# Supplementary material
Source: Research Square preprint supplement (doi:10.21203/rs.3.rs-8743768/v1)

AACI

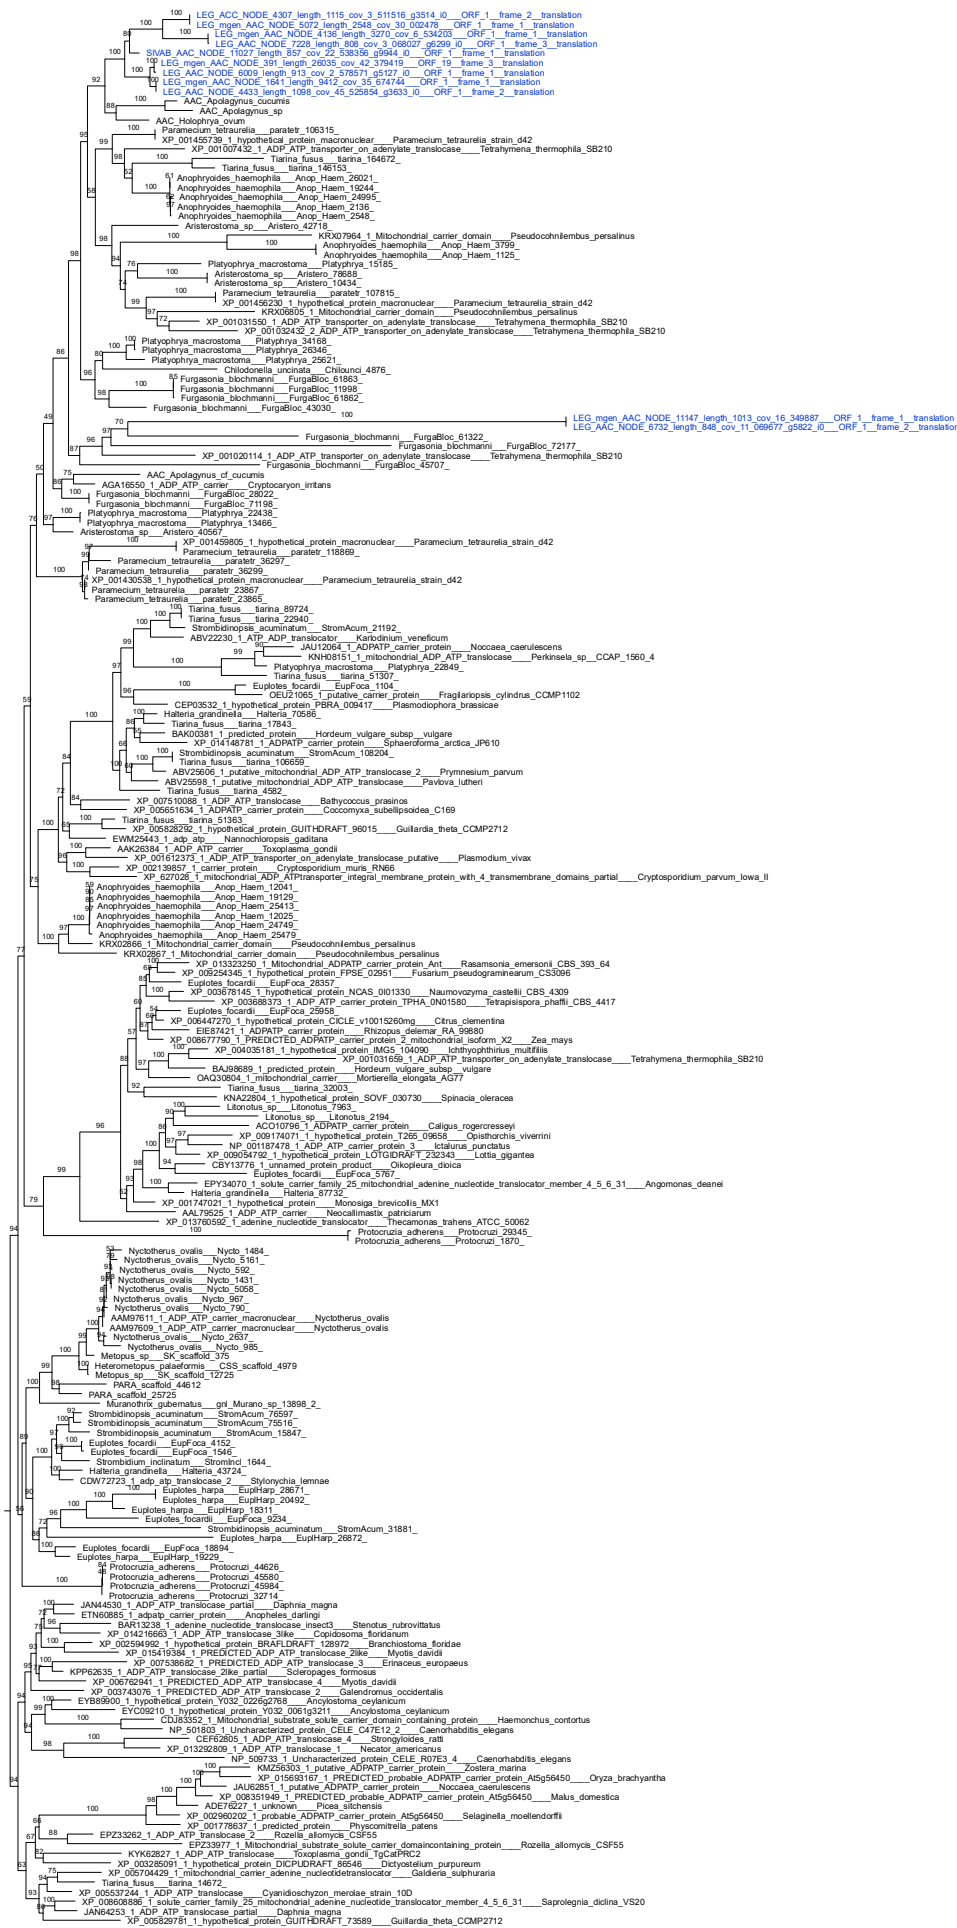

# AADH

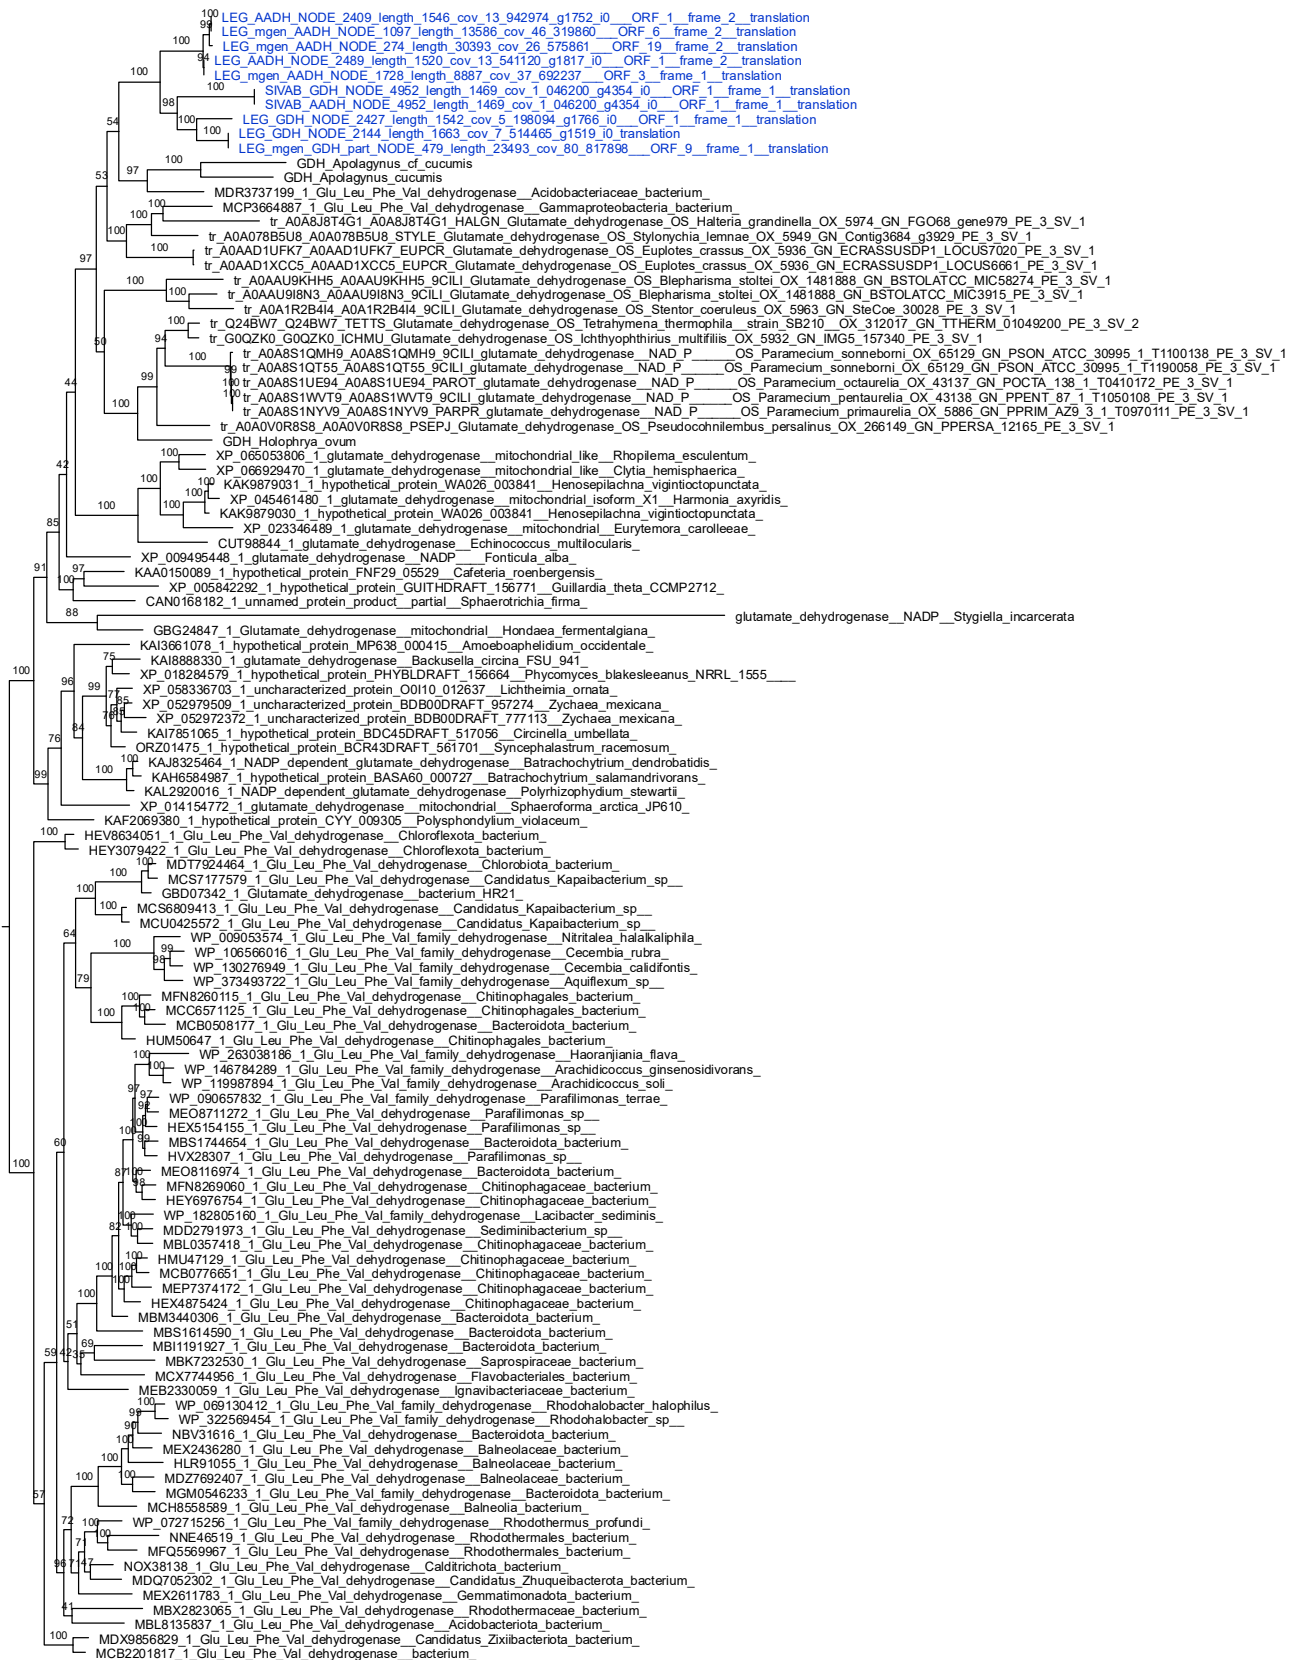



ACAT -

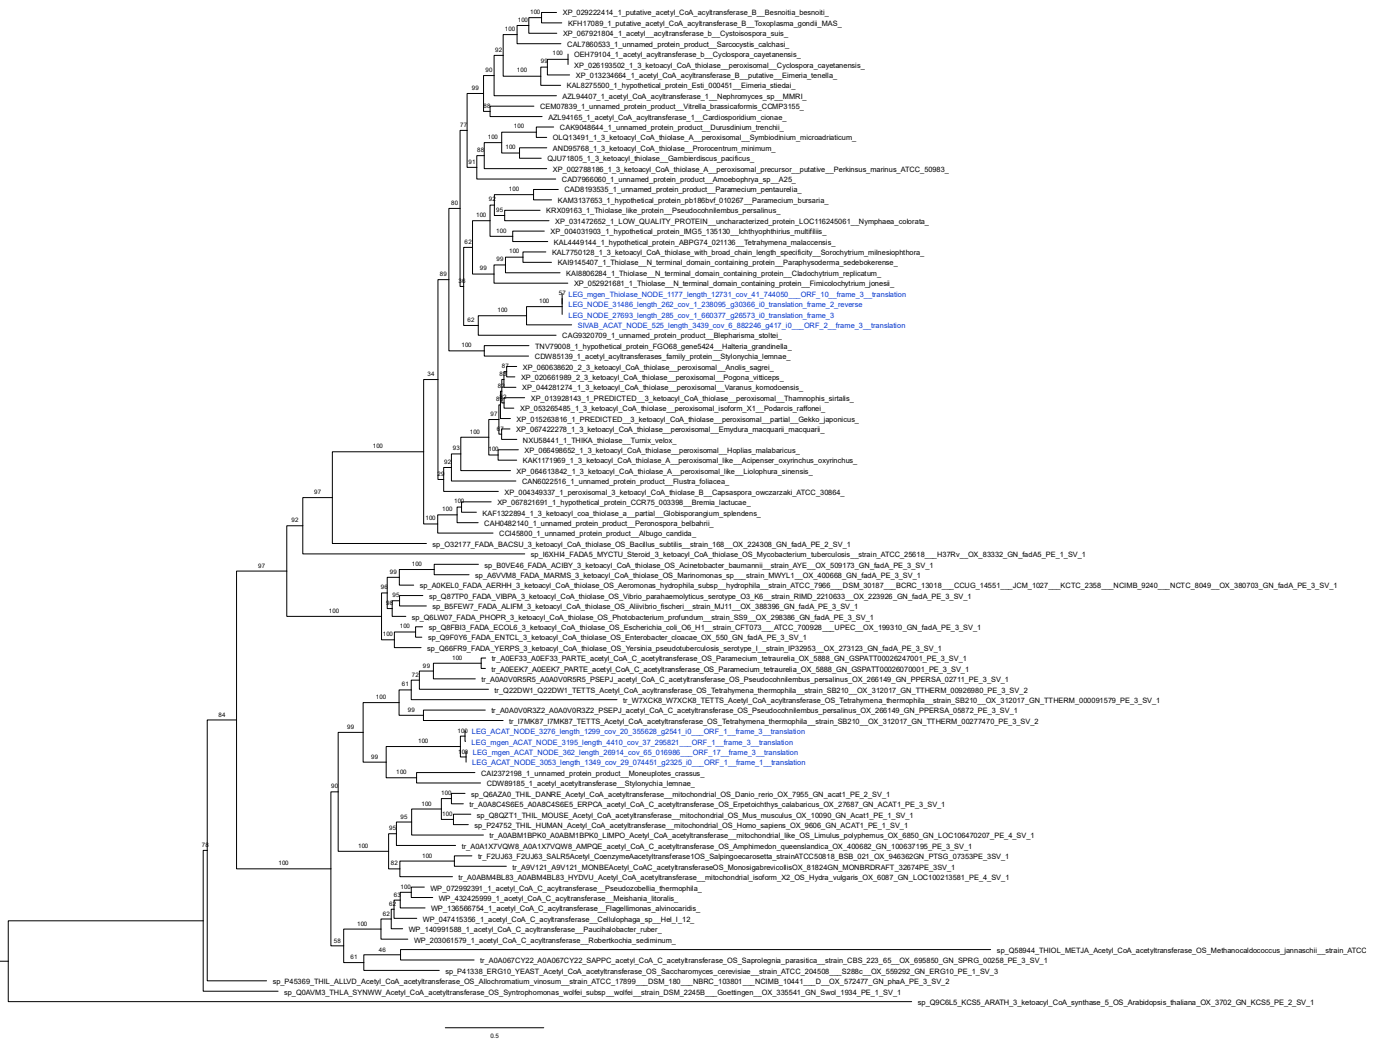

# ACTE/ACOT - acyl-CoA thioesterase

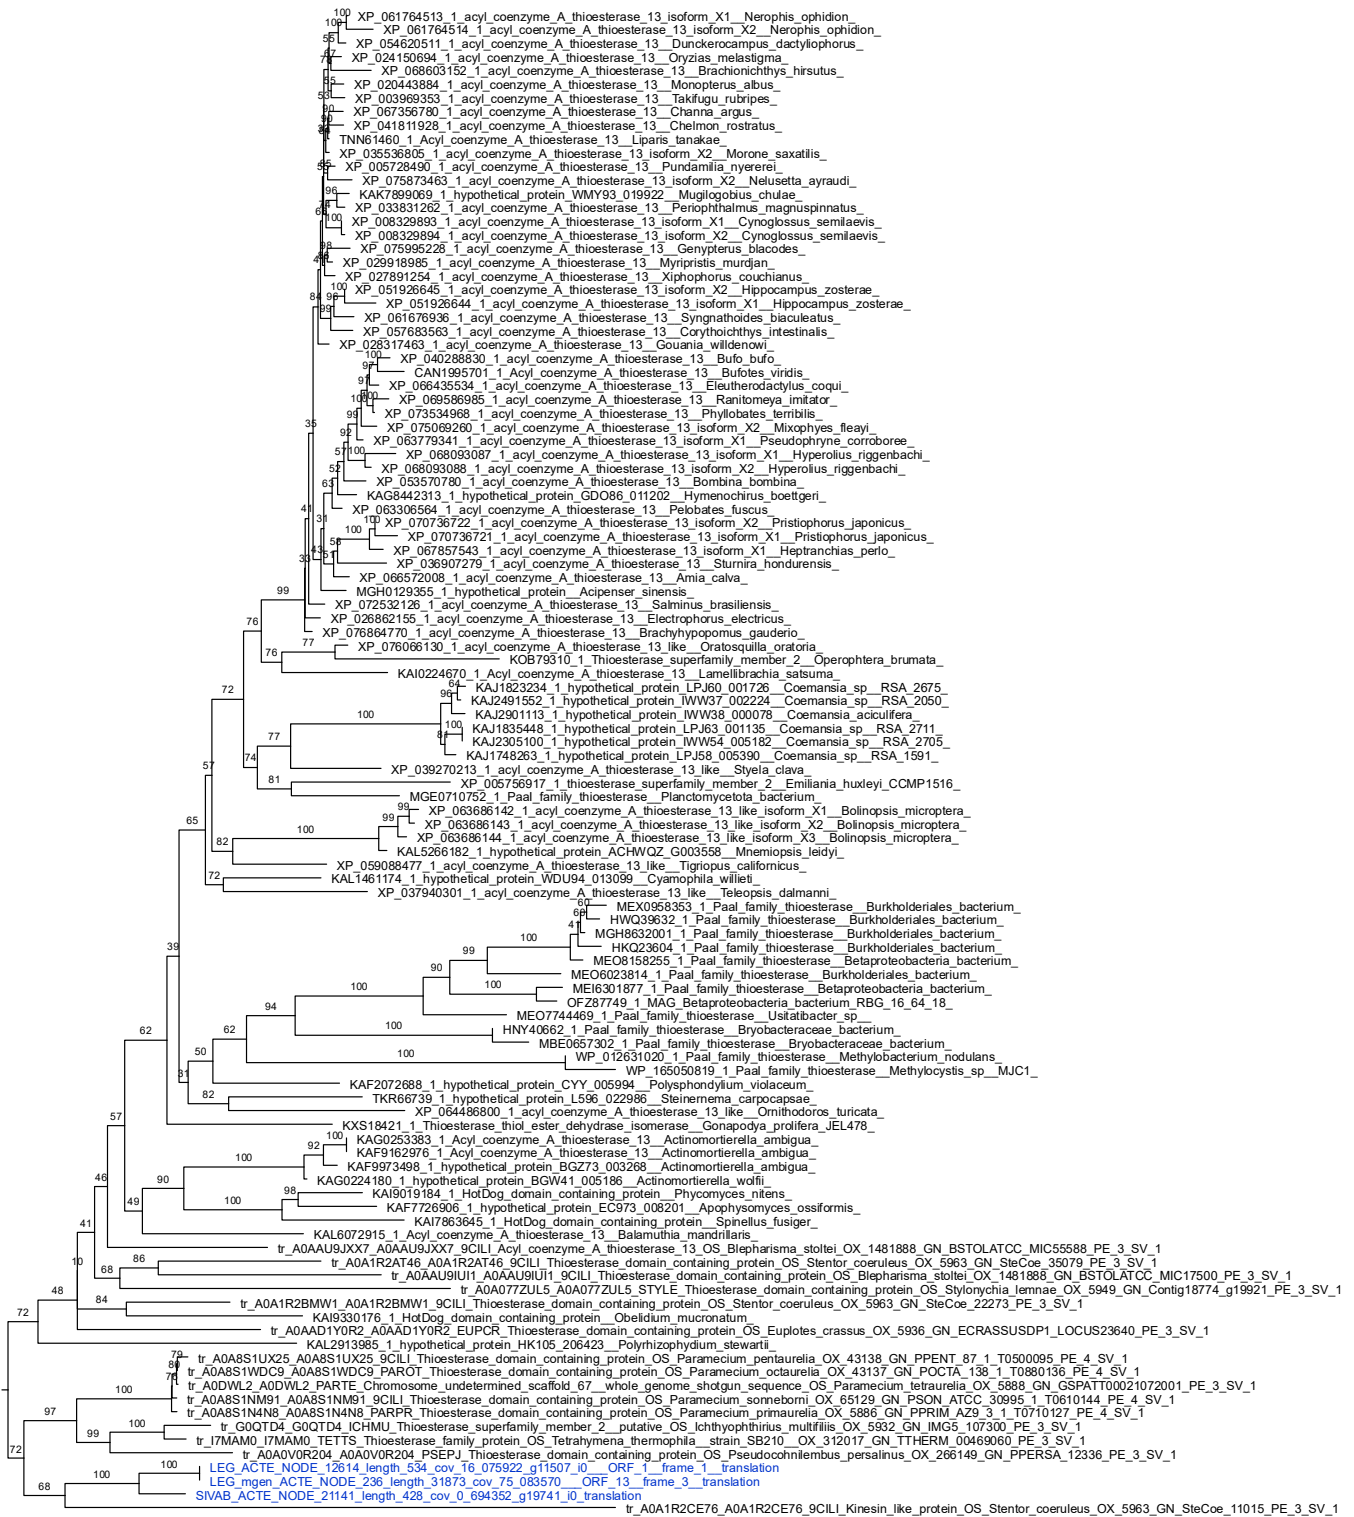

0.4

# ACO – aconythase

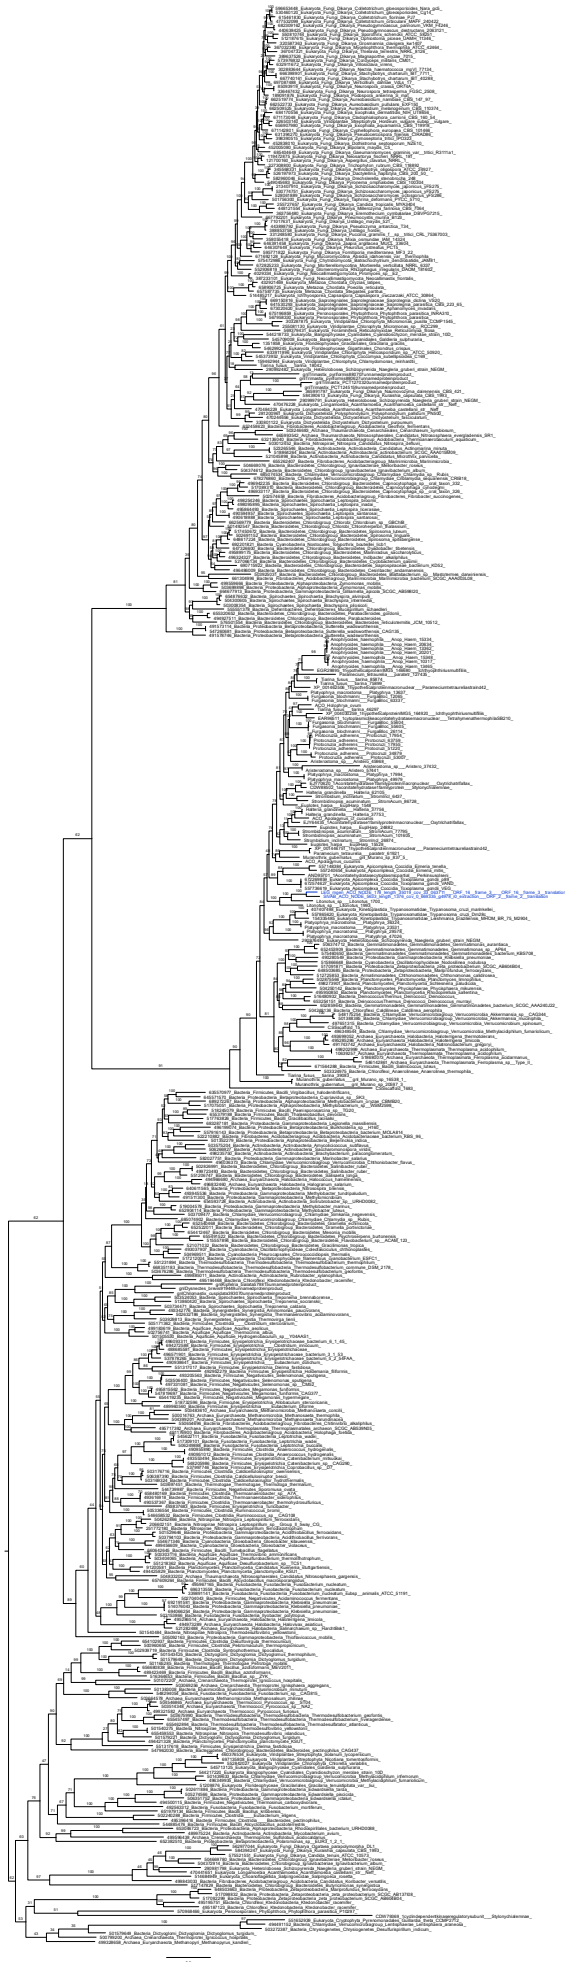



# ALDH - aldehyde dehydrogenase

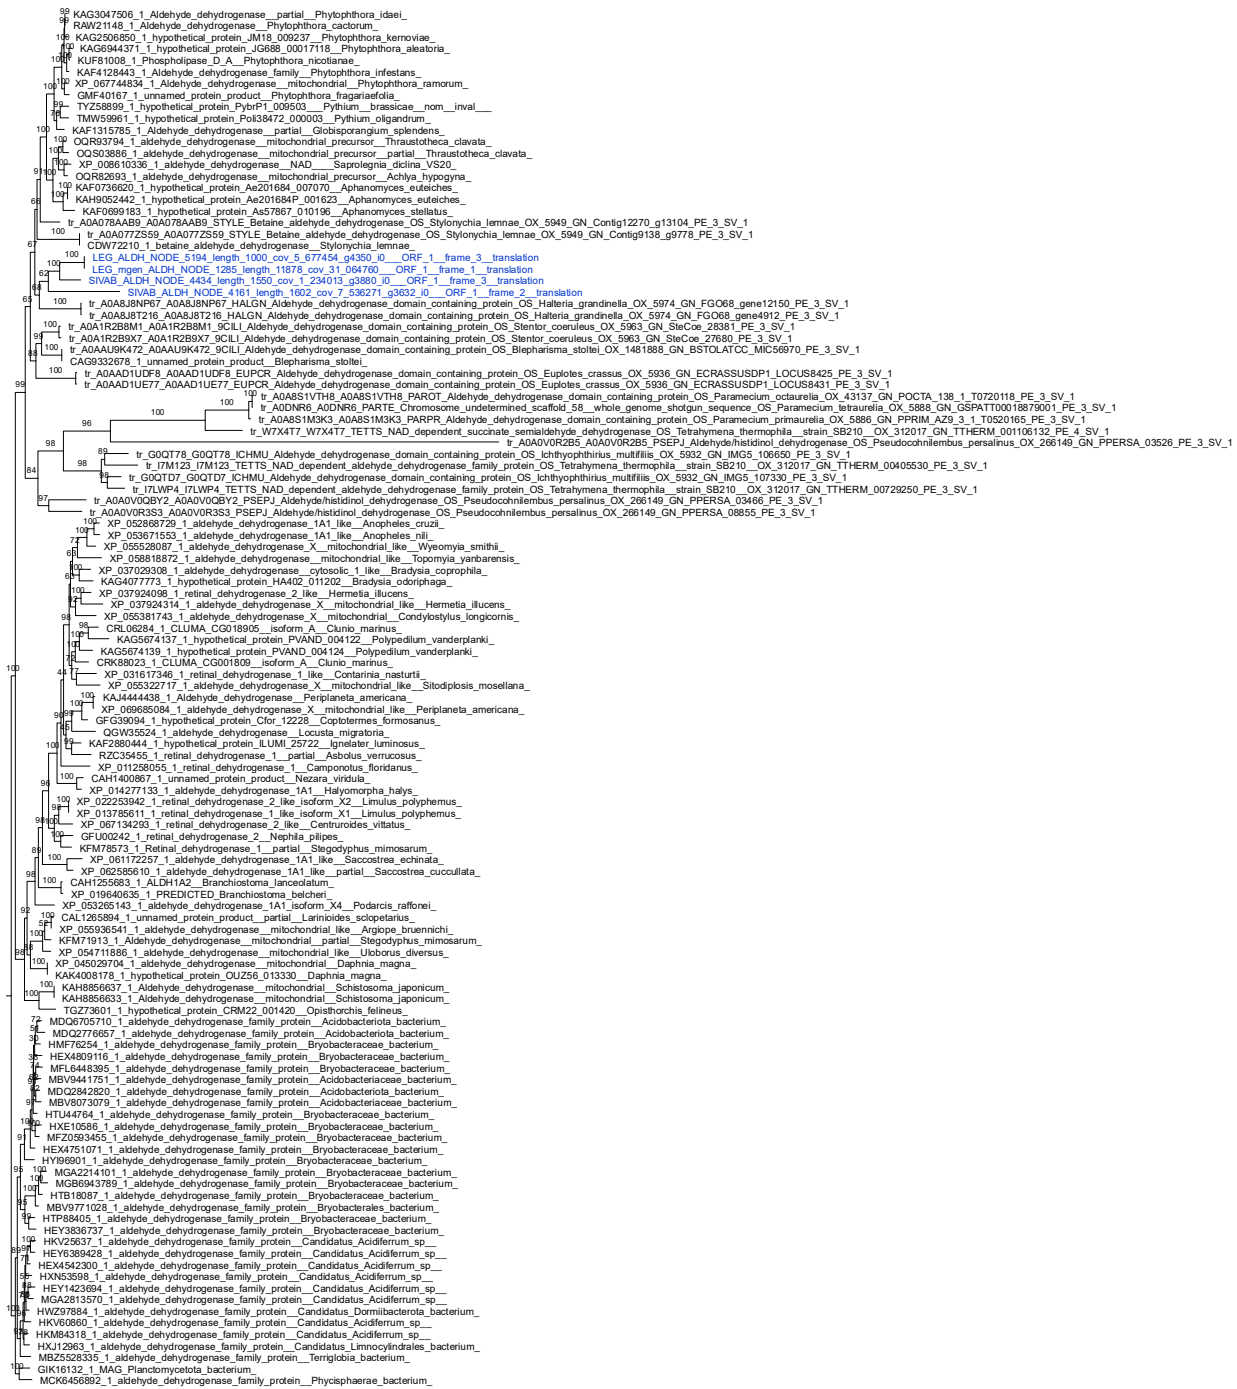

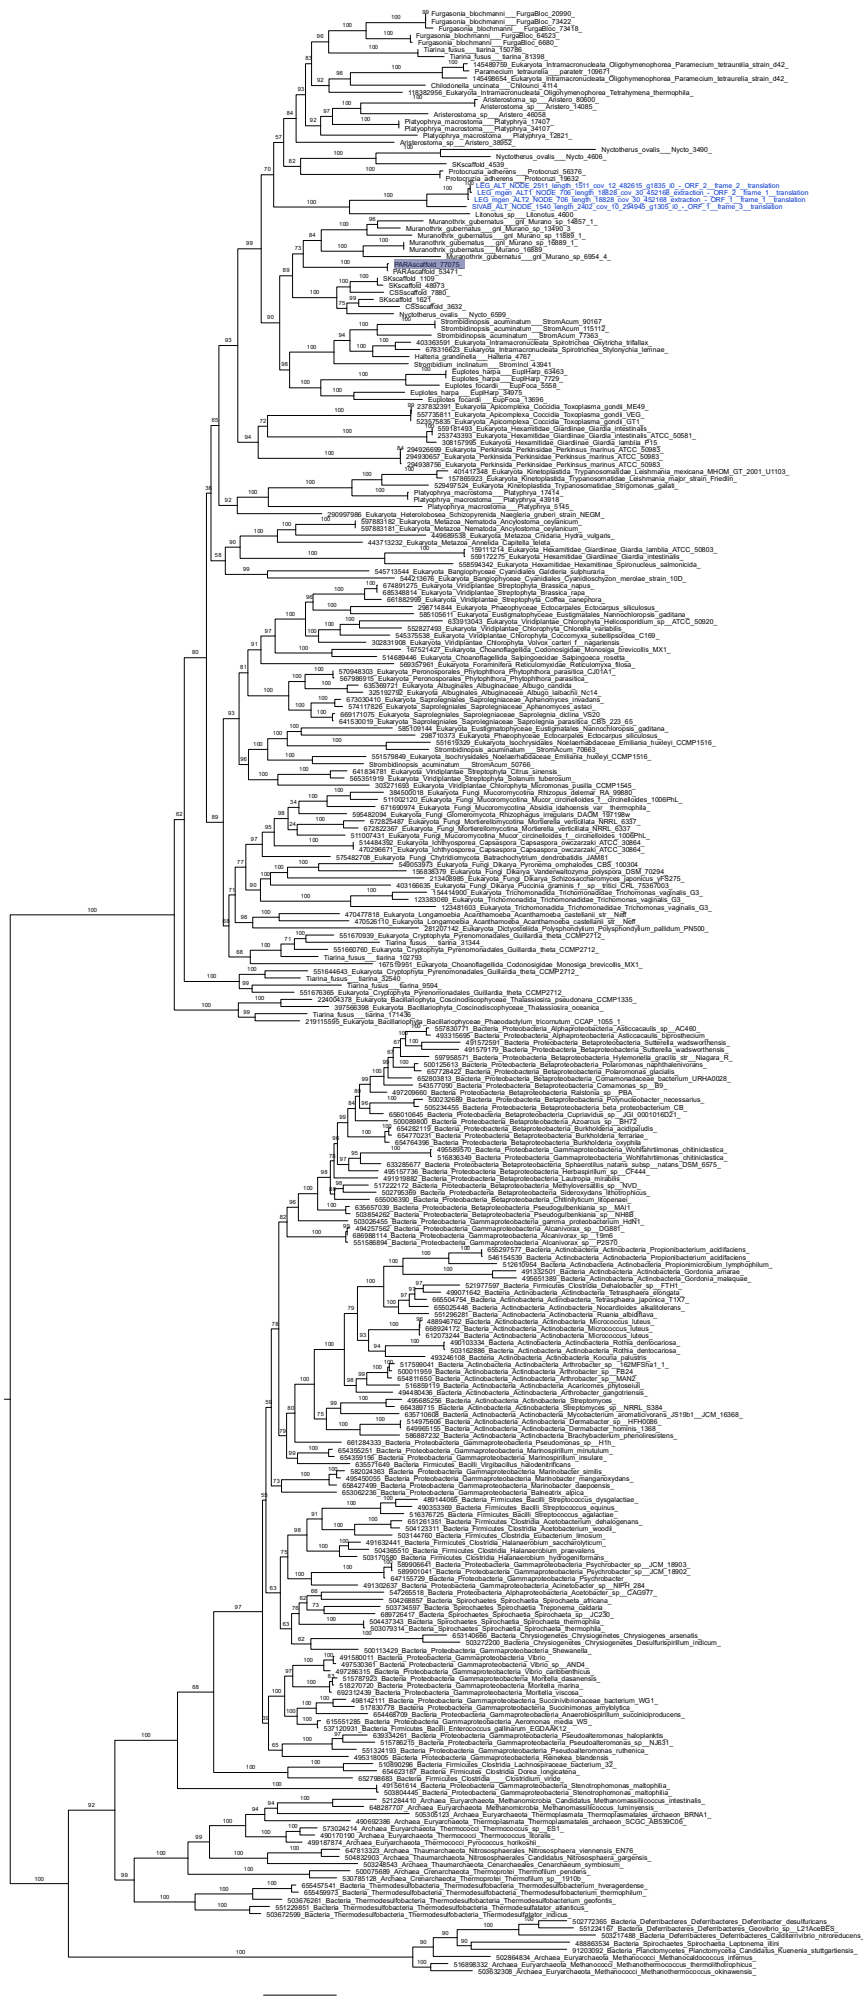

AST -

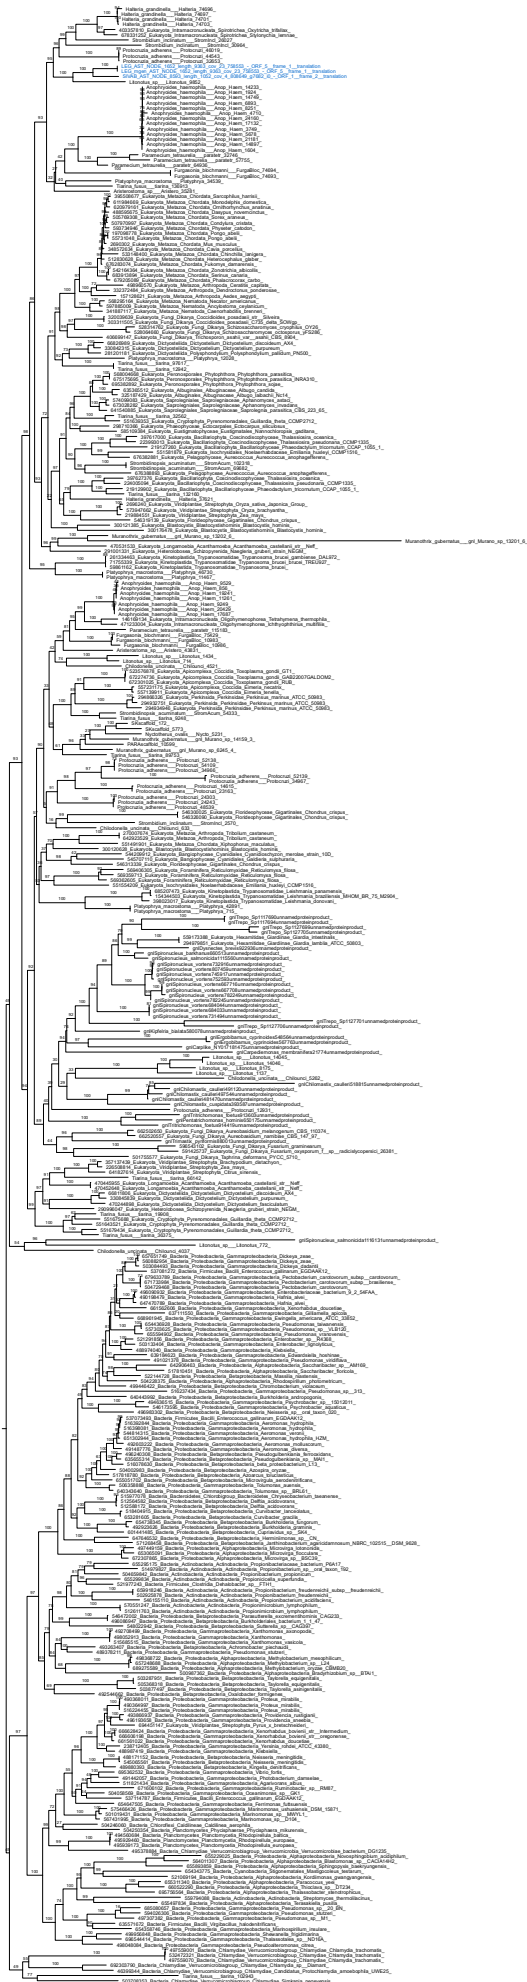



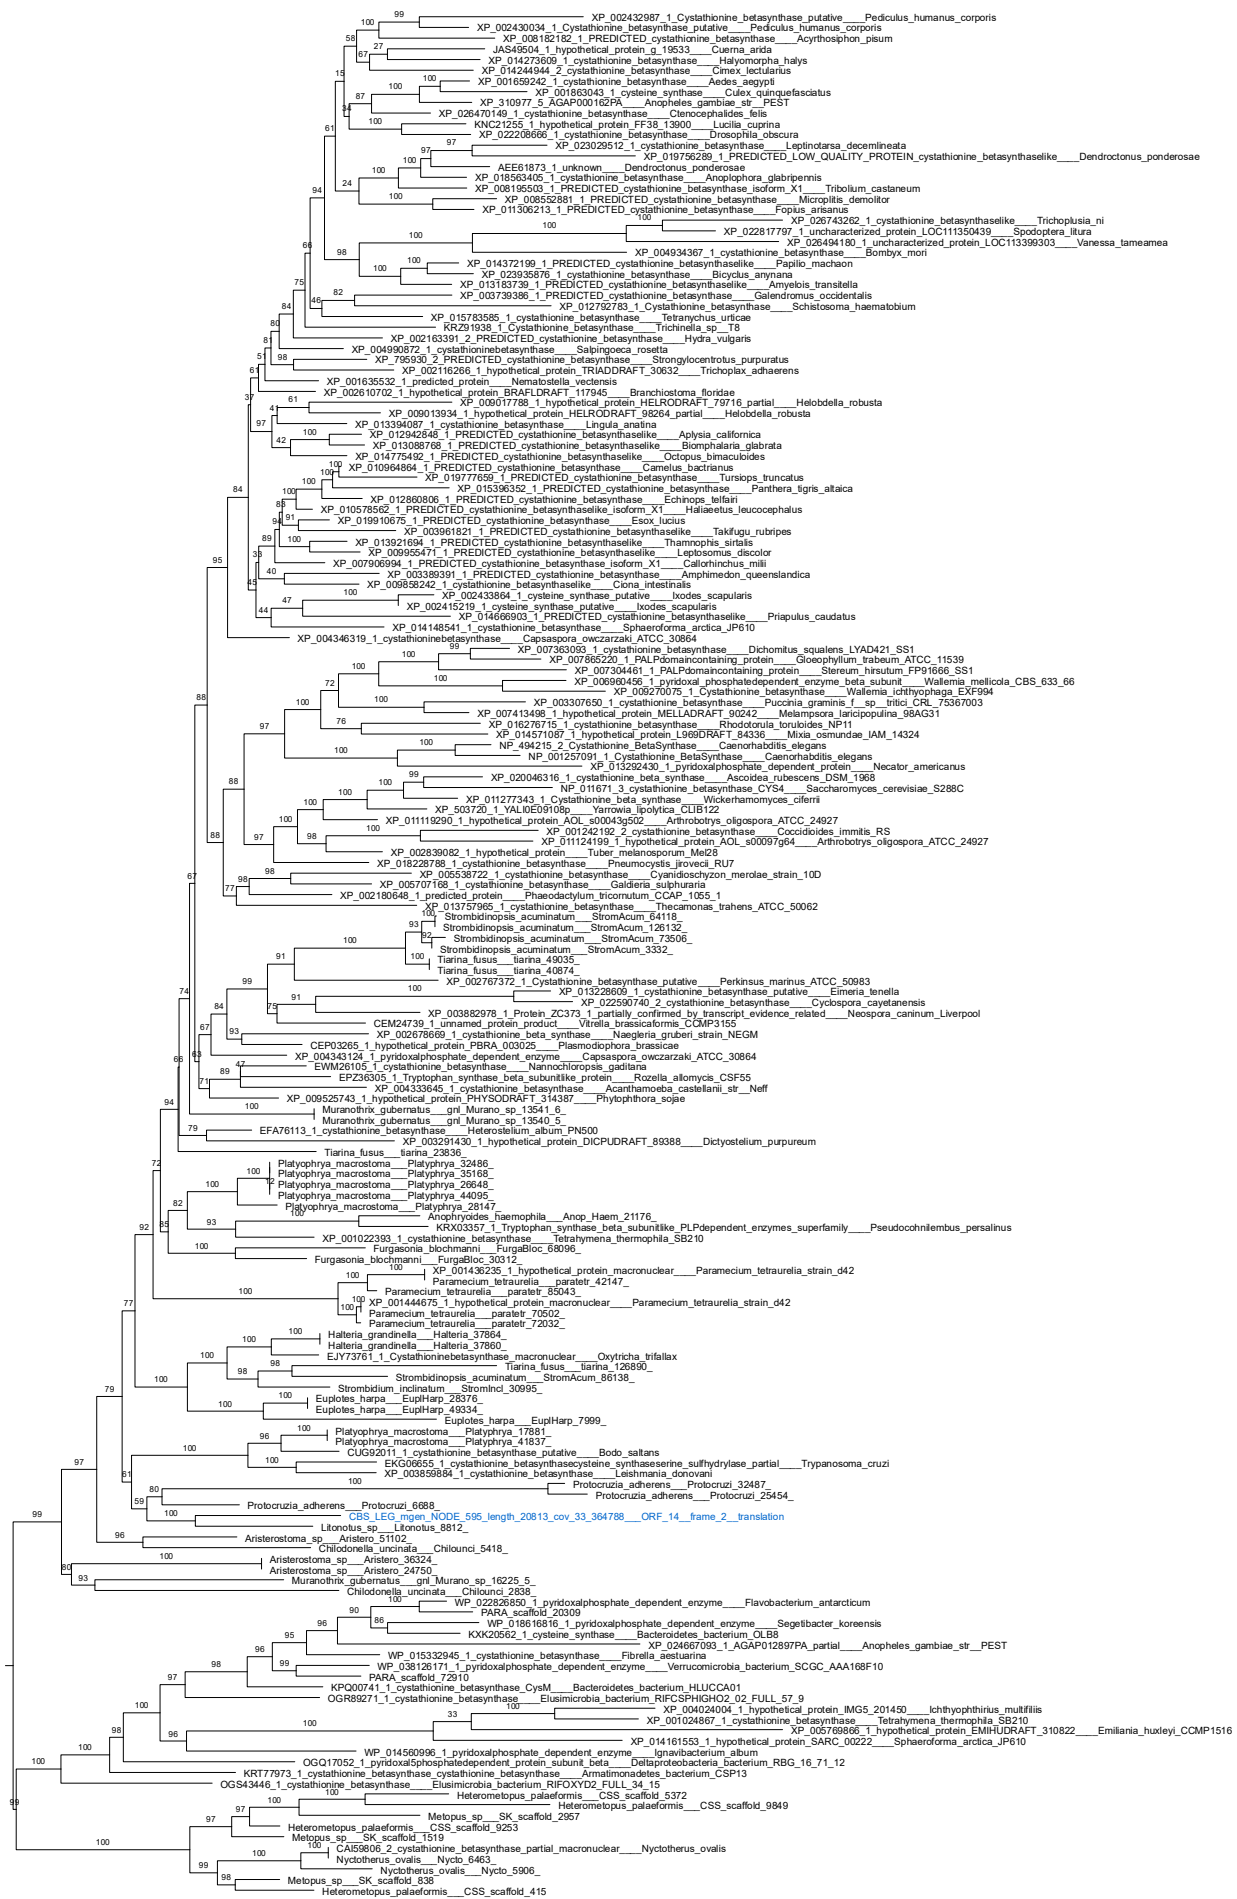

# ECH - enoyl-CoA hydratase

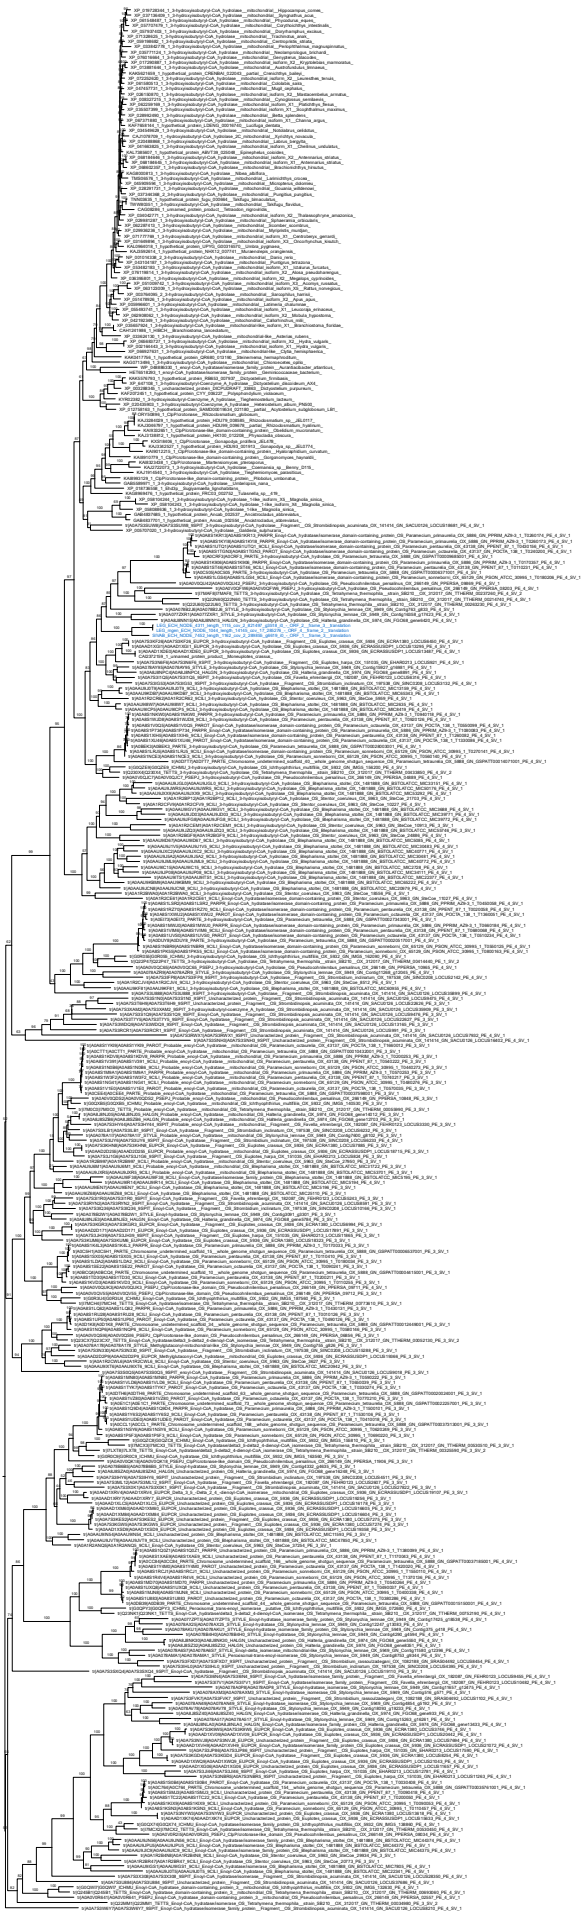





# FRD - fumarate reductase

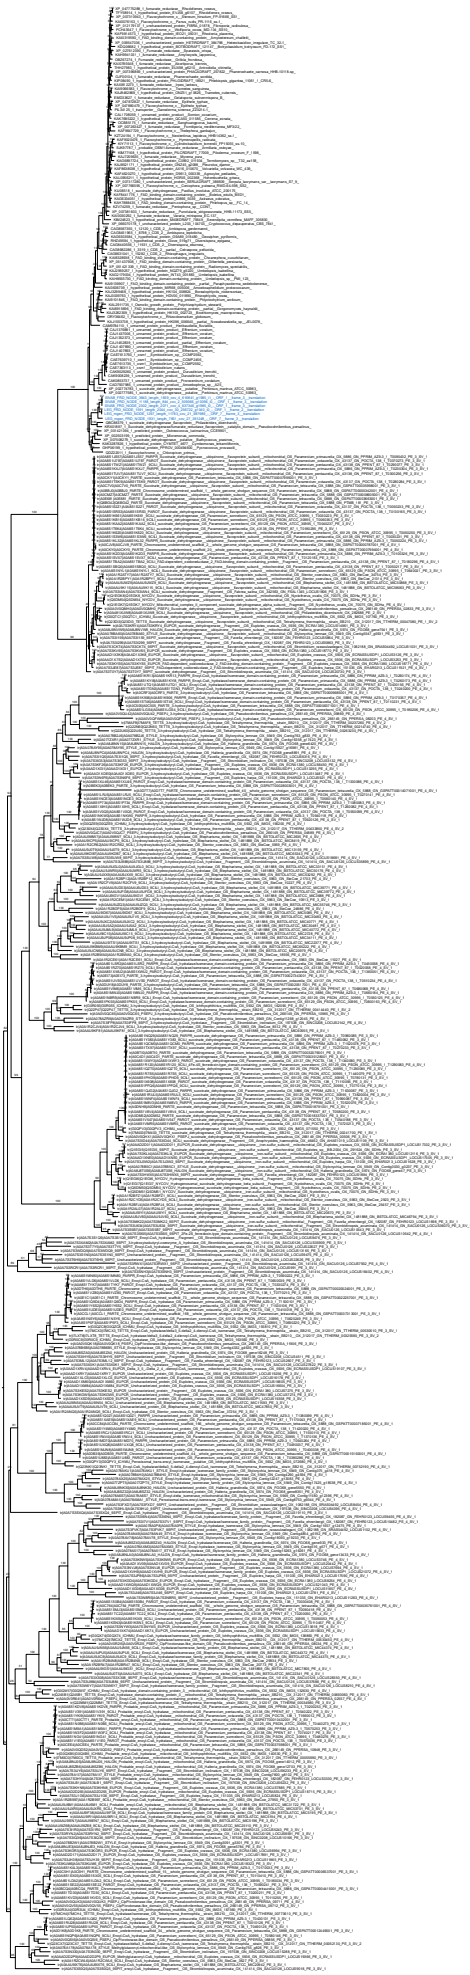

FUM -

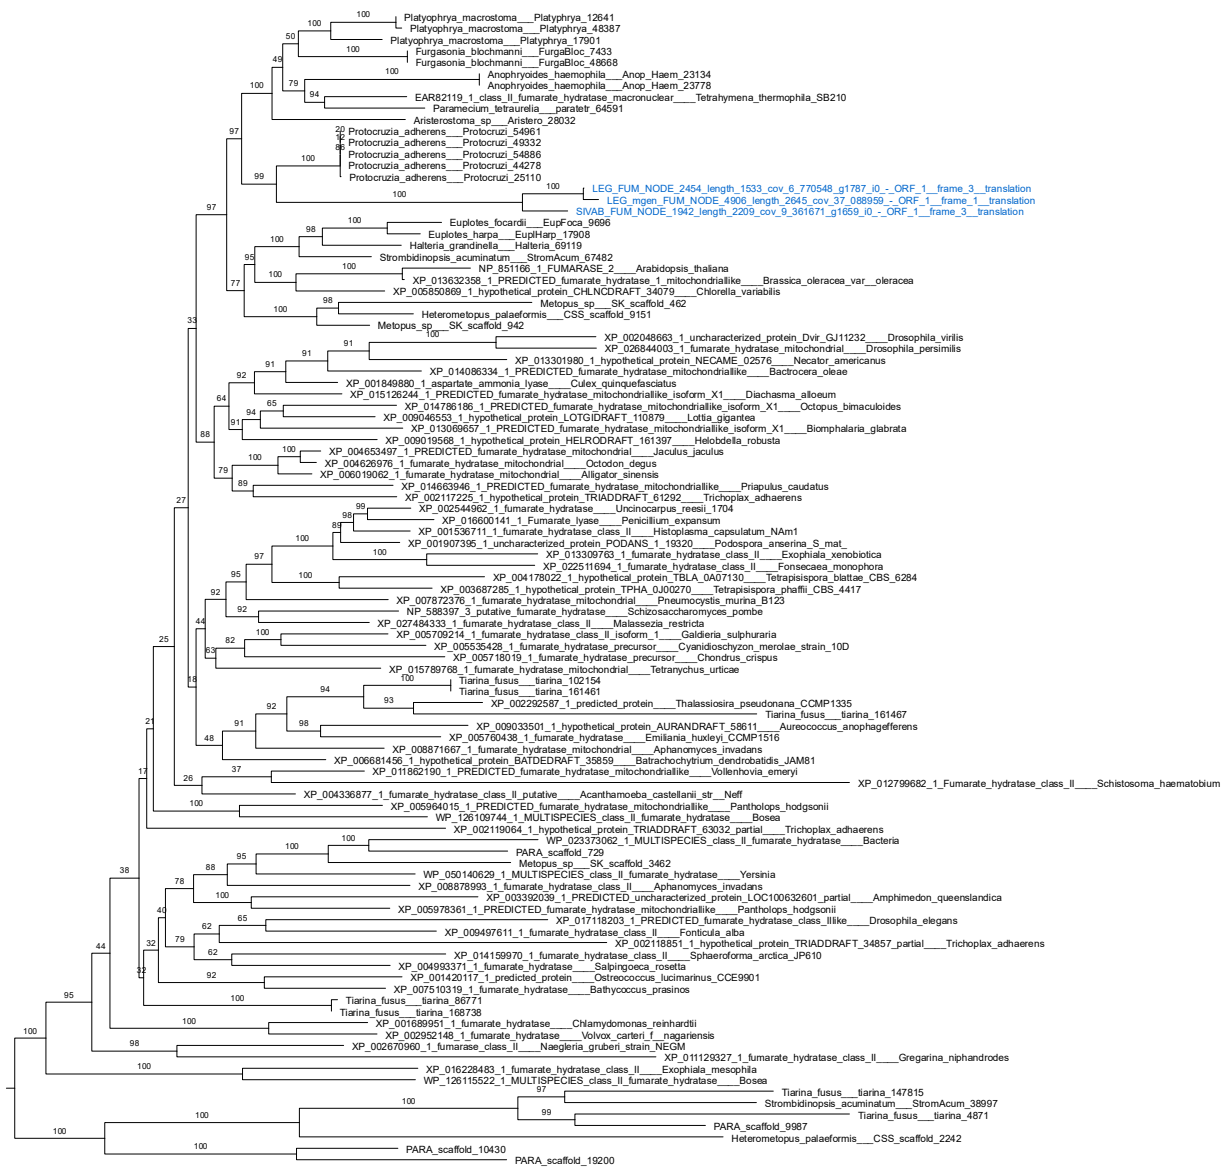

0.3

# GCSH -

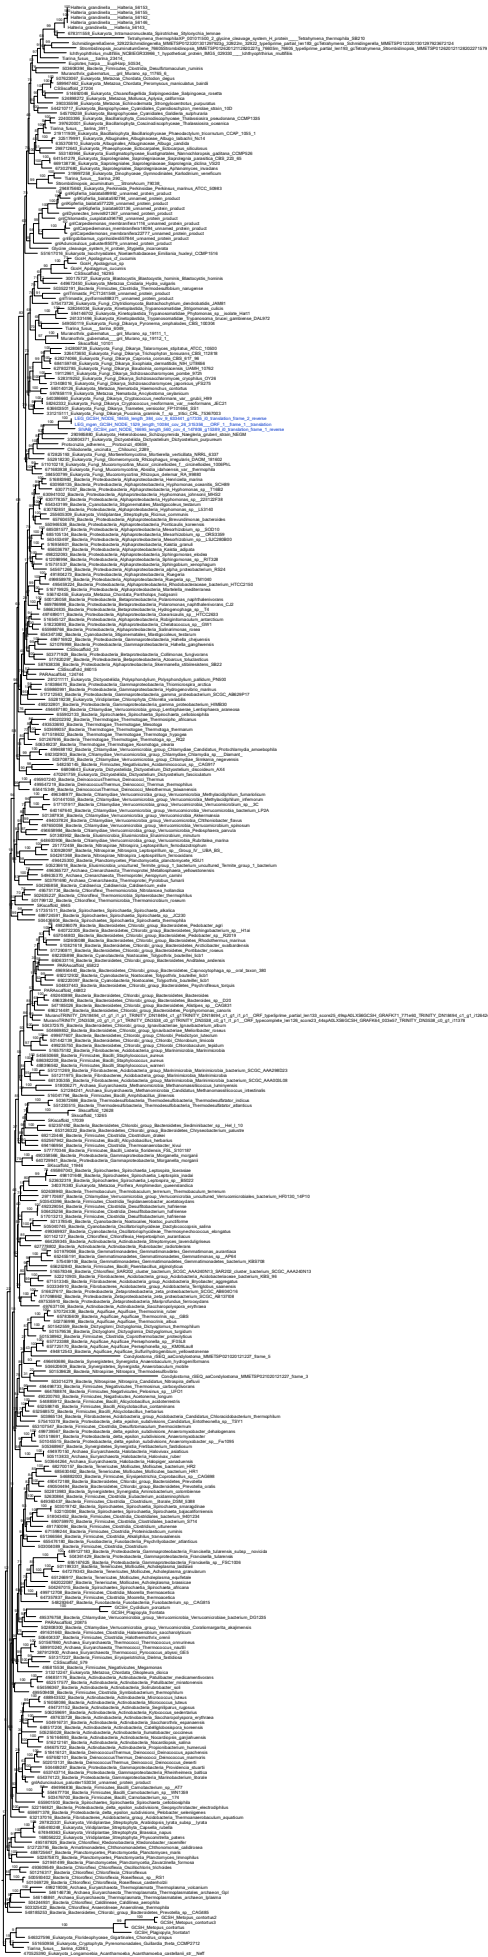

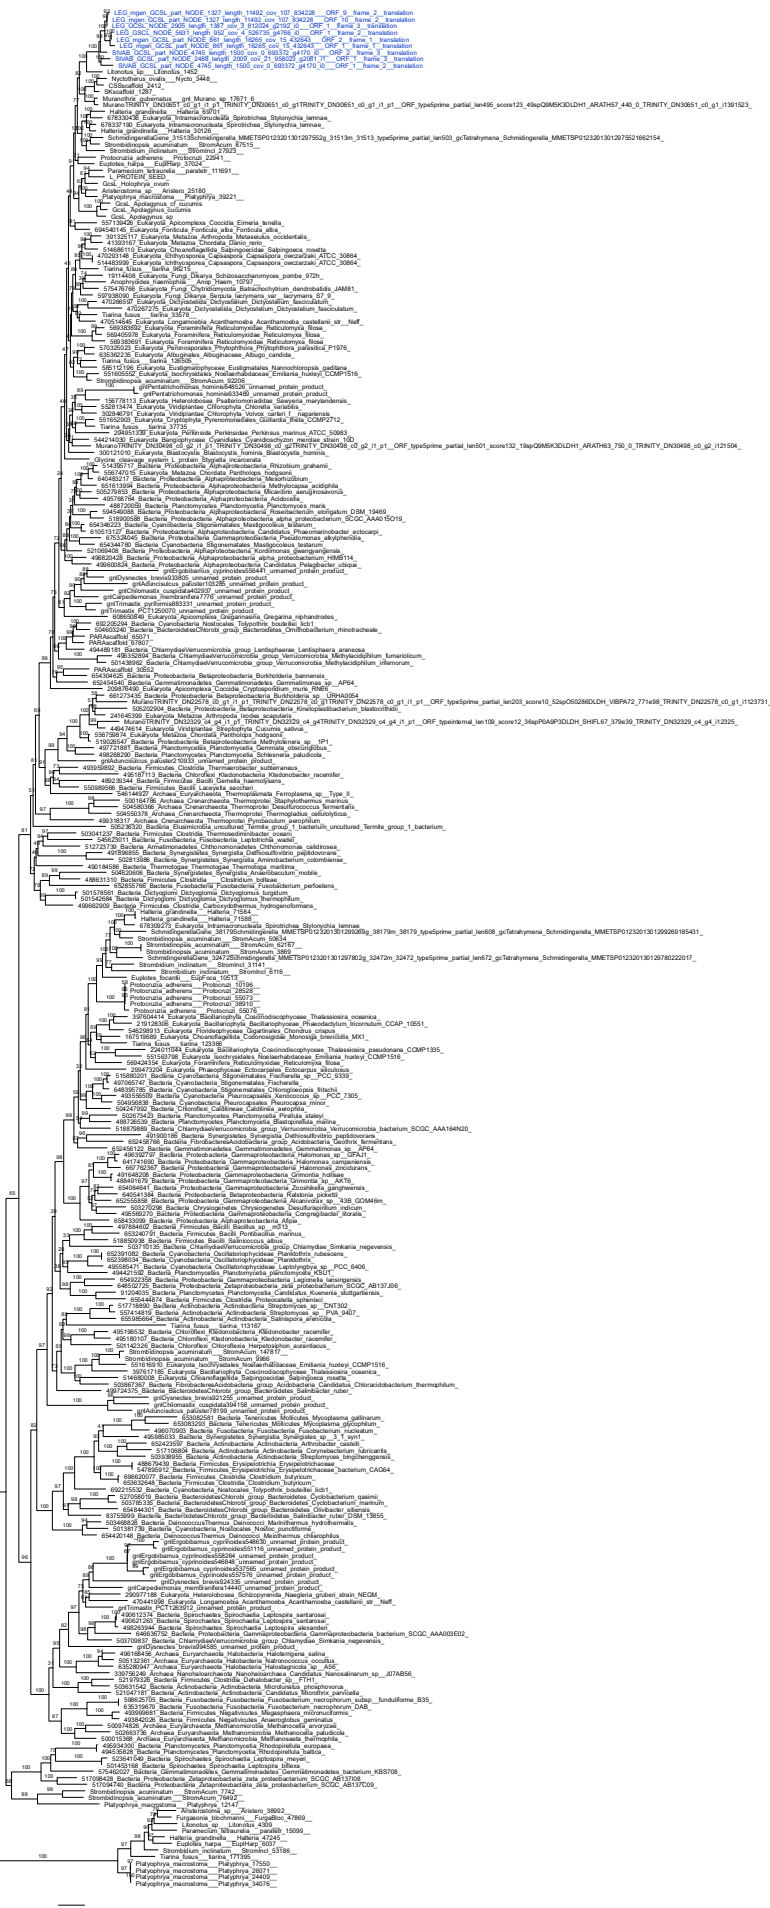

GCST -

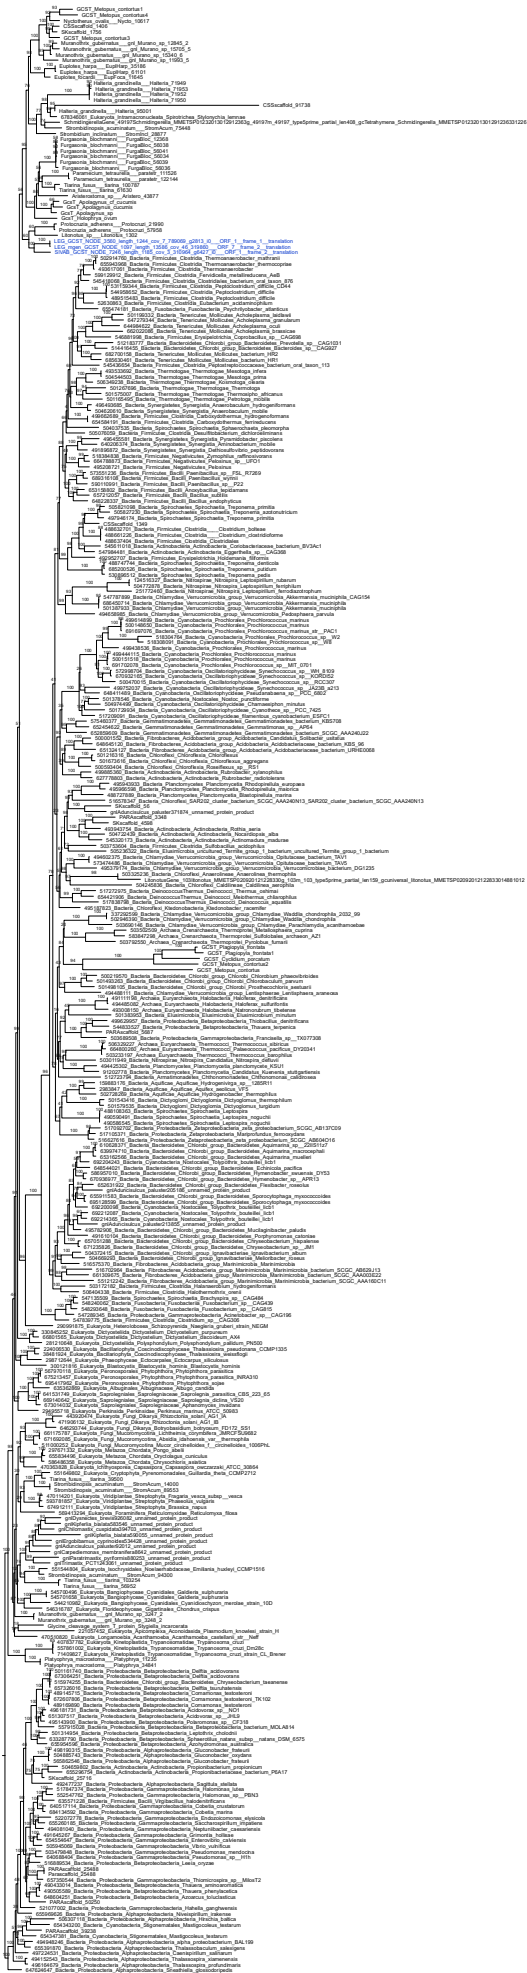

# GcvP -

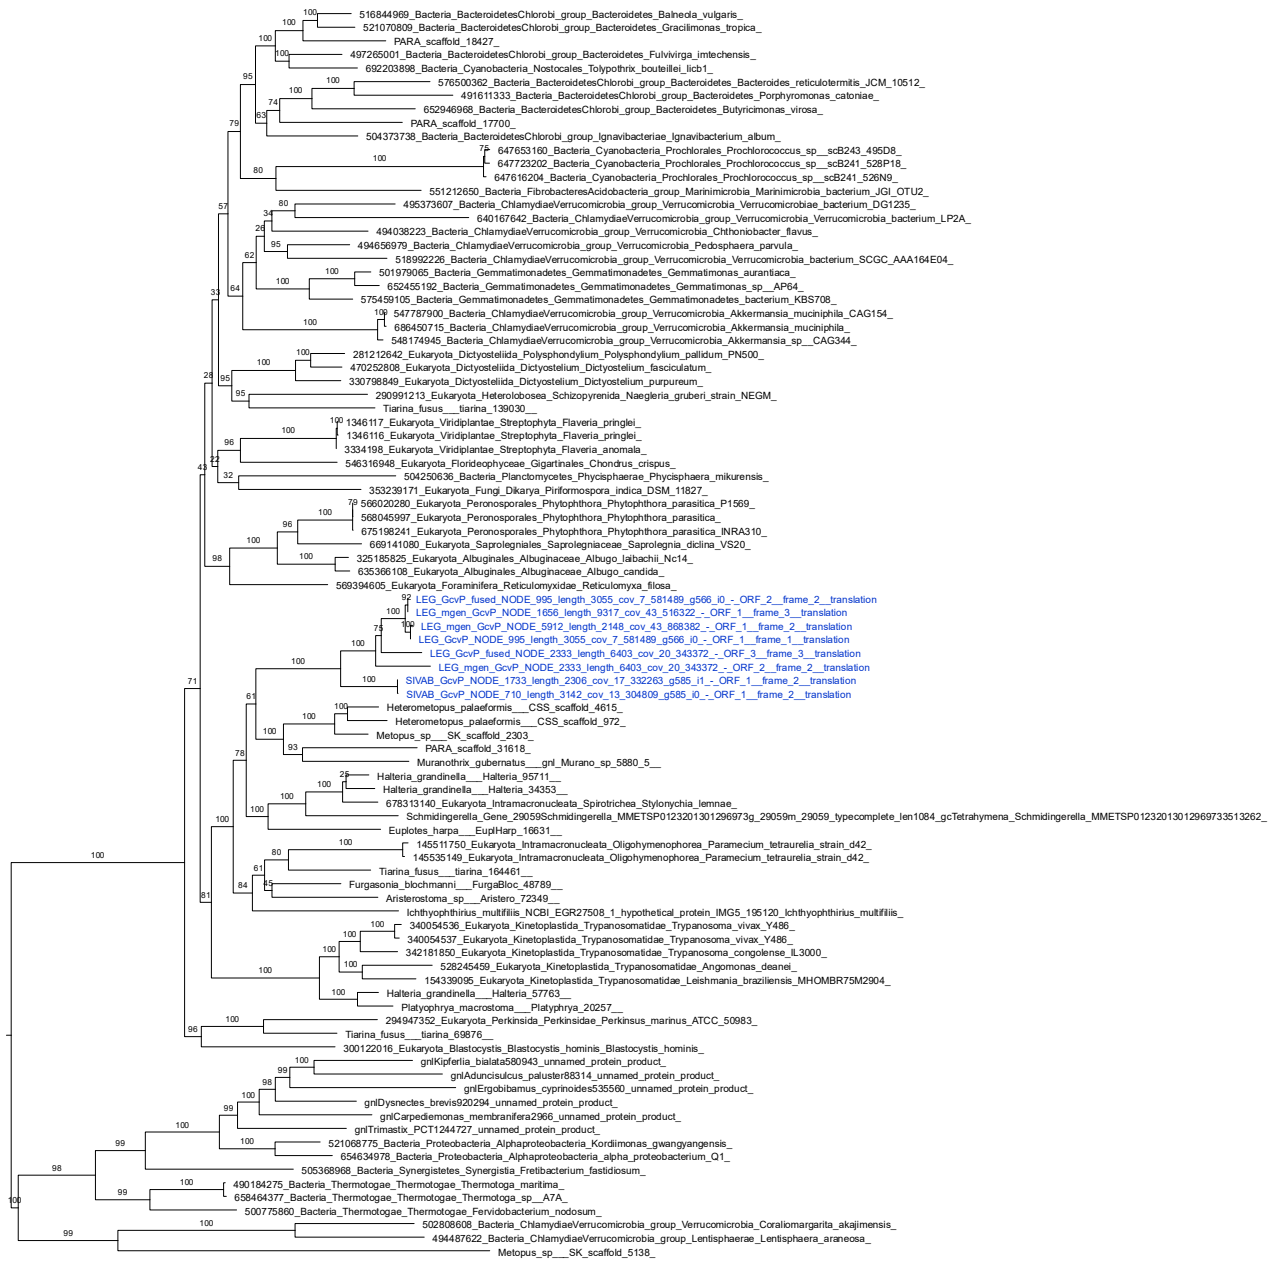



Grpe –

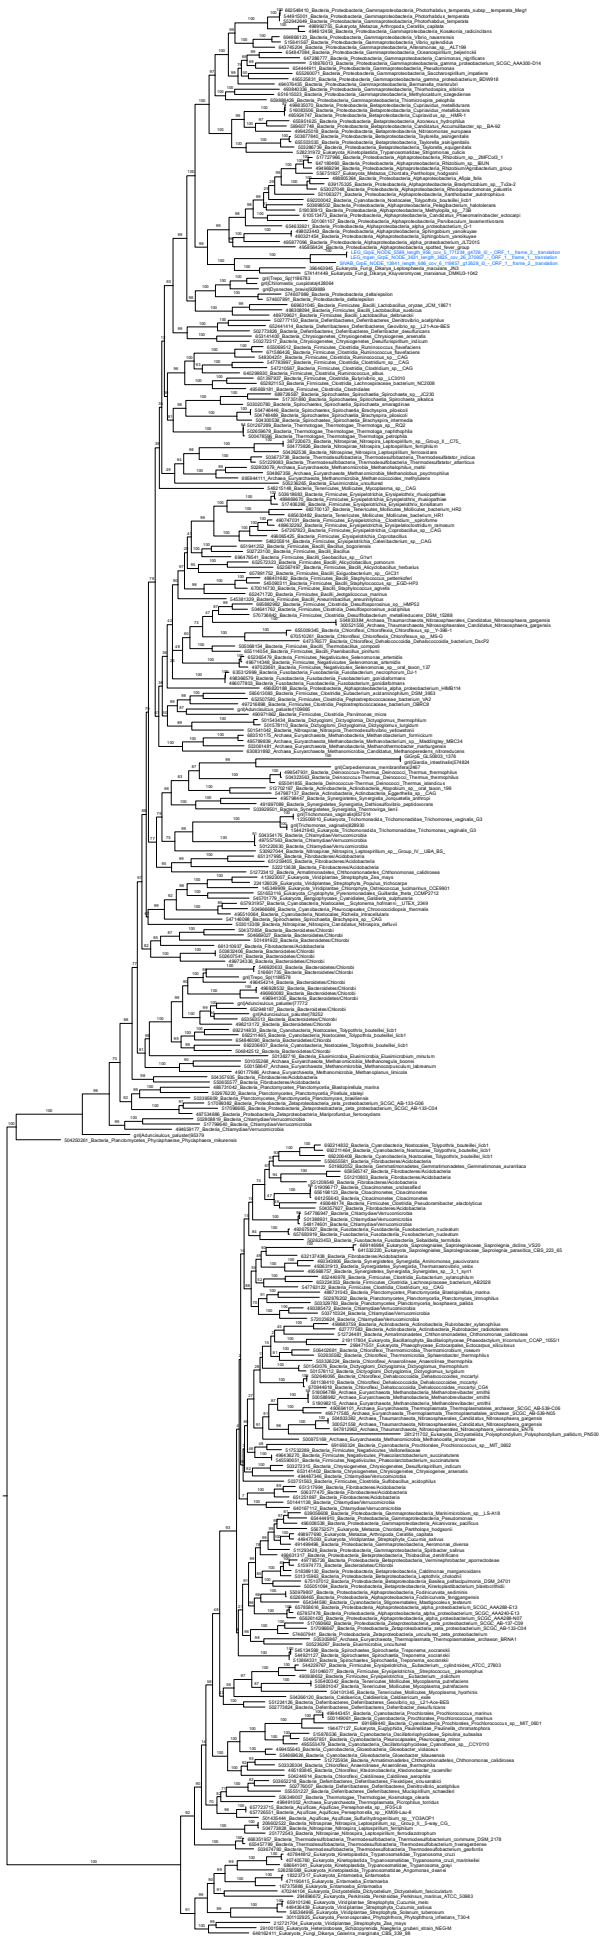



# HIBADH - 3-hydroxyisobutyrate dehydrogenase

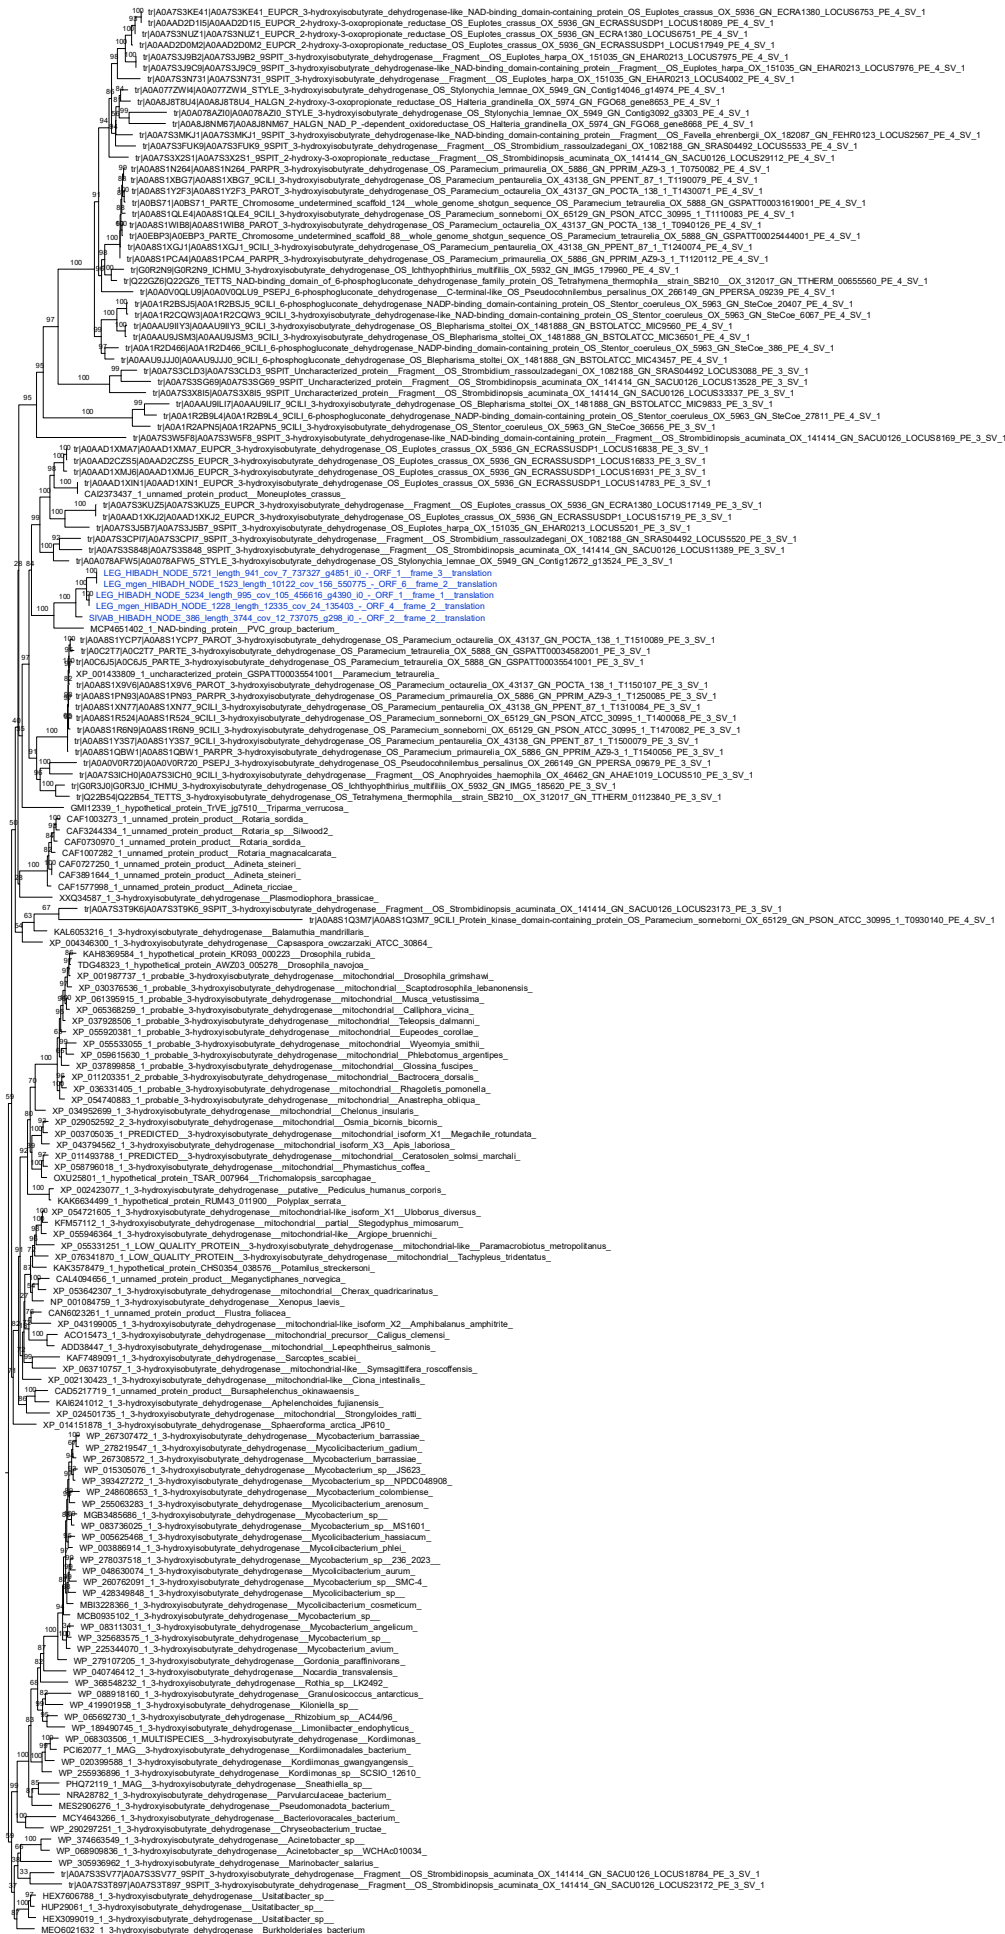









# IscS - cysteine desulfurase

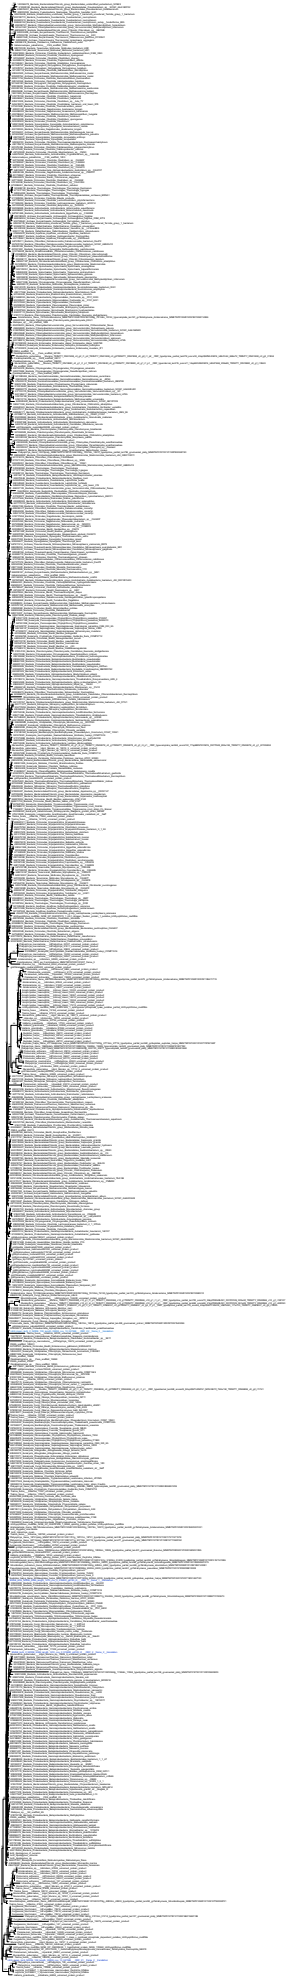

IscU

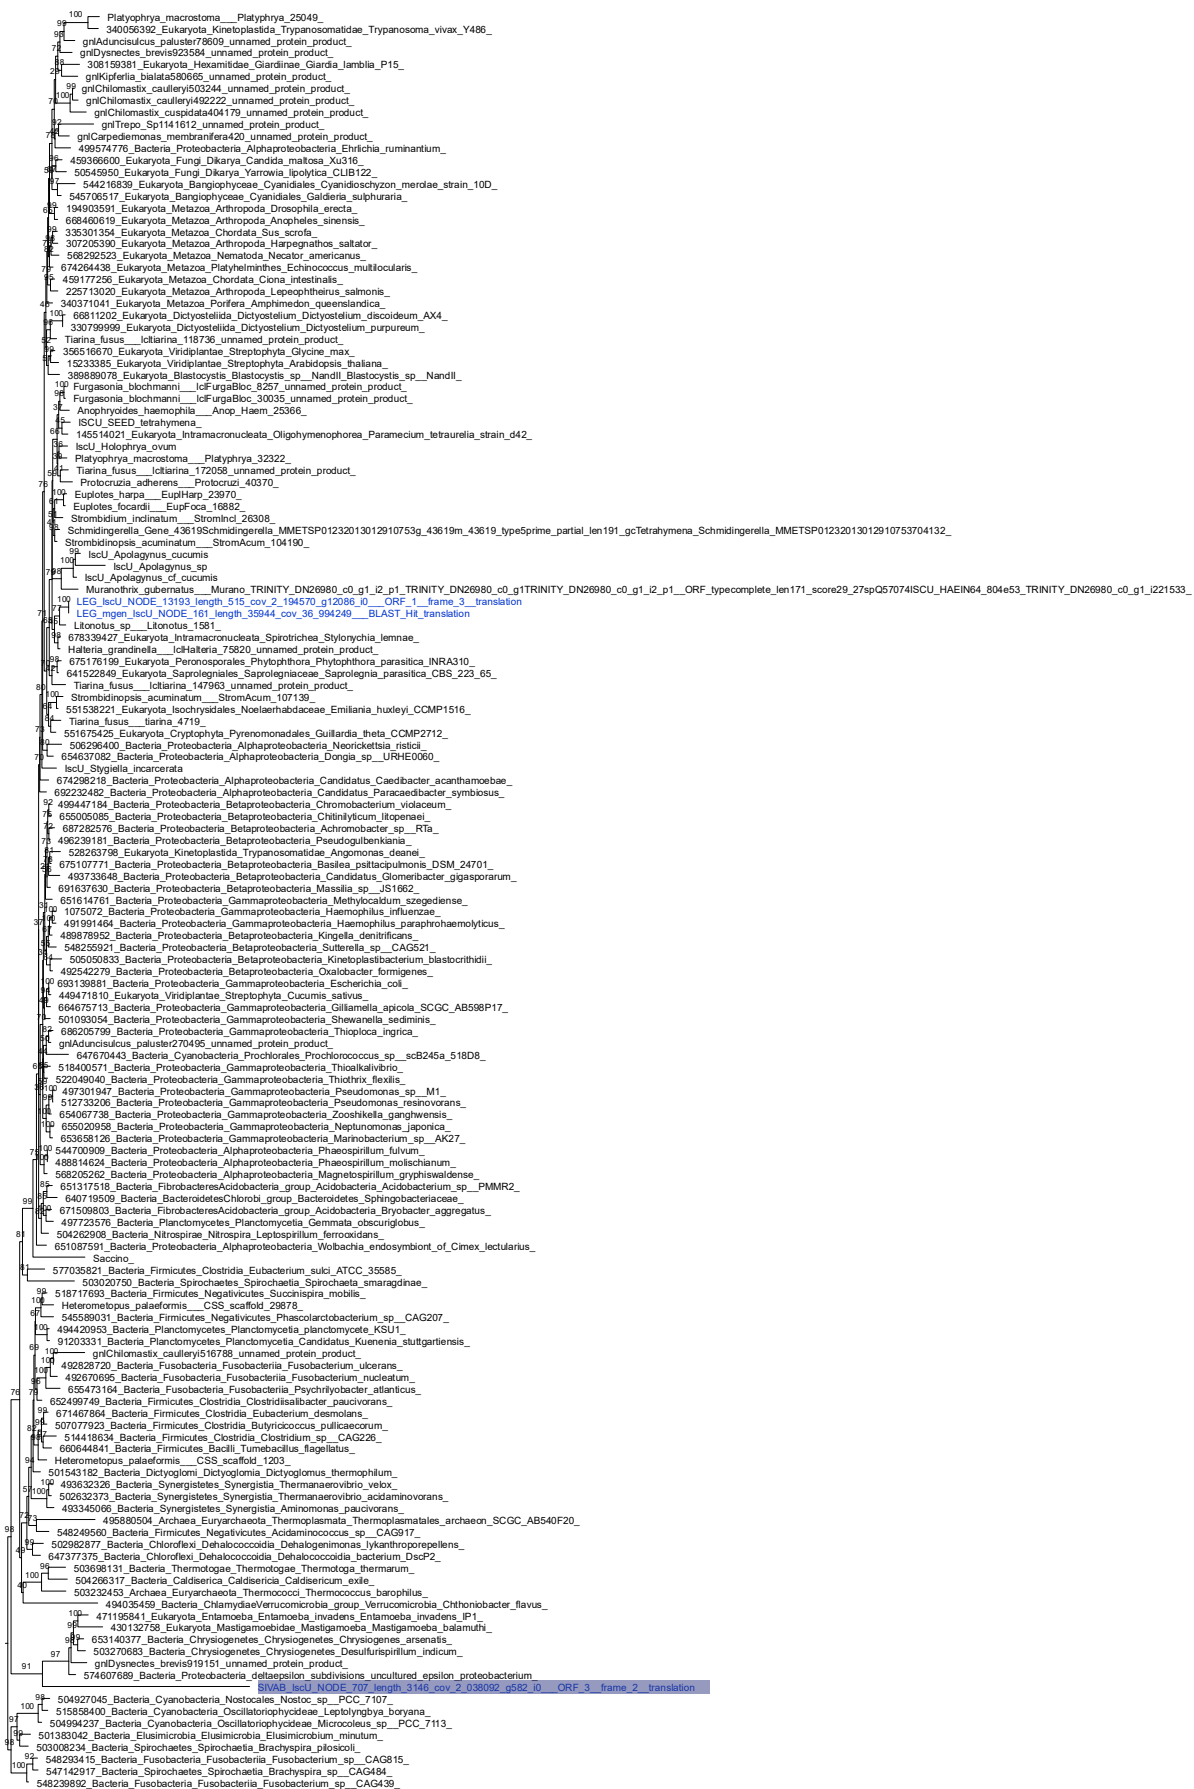



# ME - malic enzyme

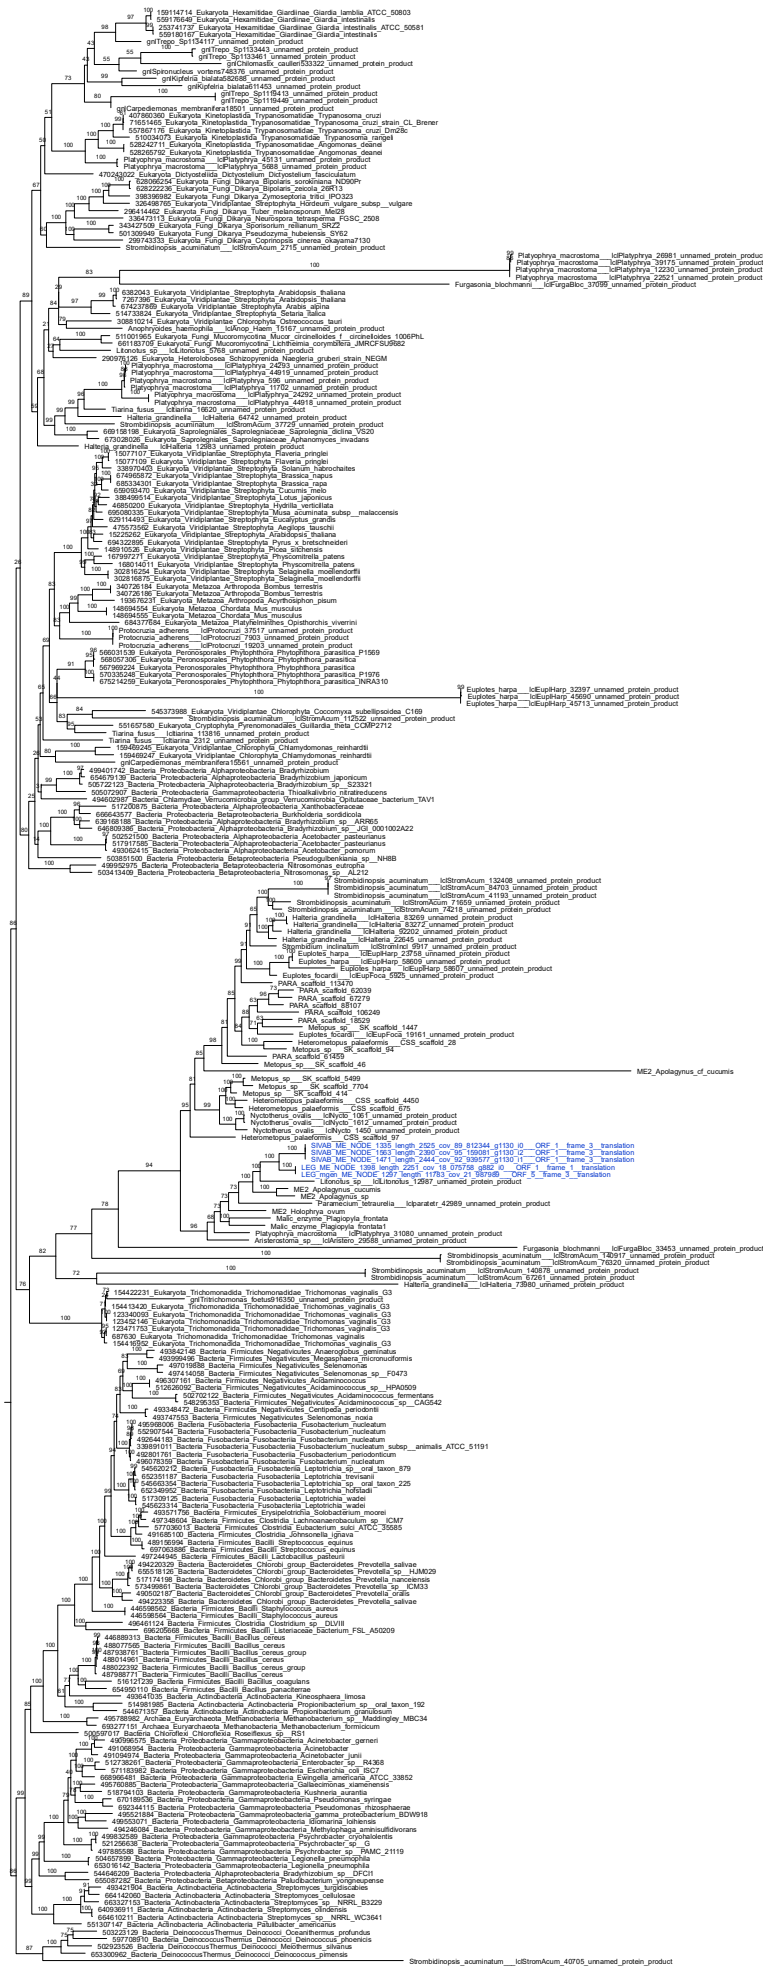



# MPPa - mitochondrial processing peptidase A

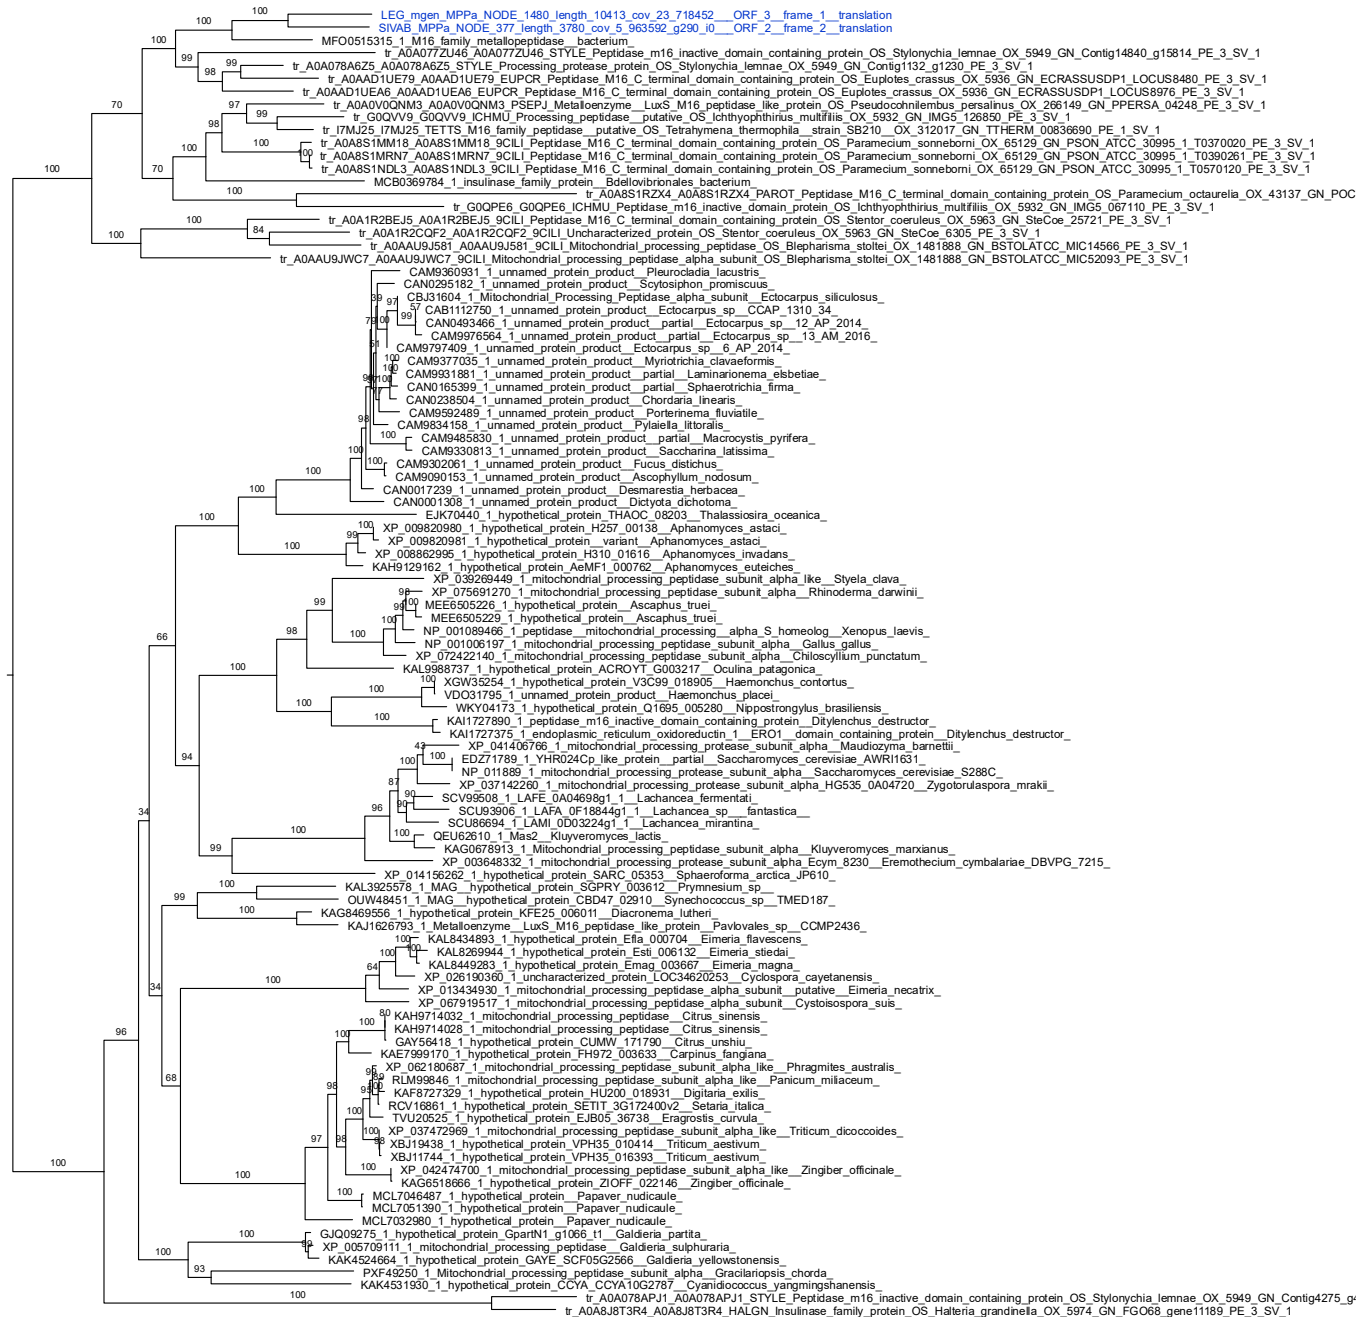

0.3



OGDHE1 -

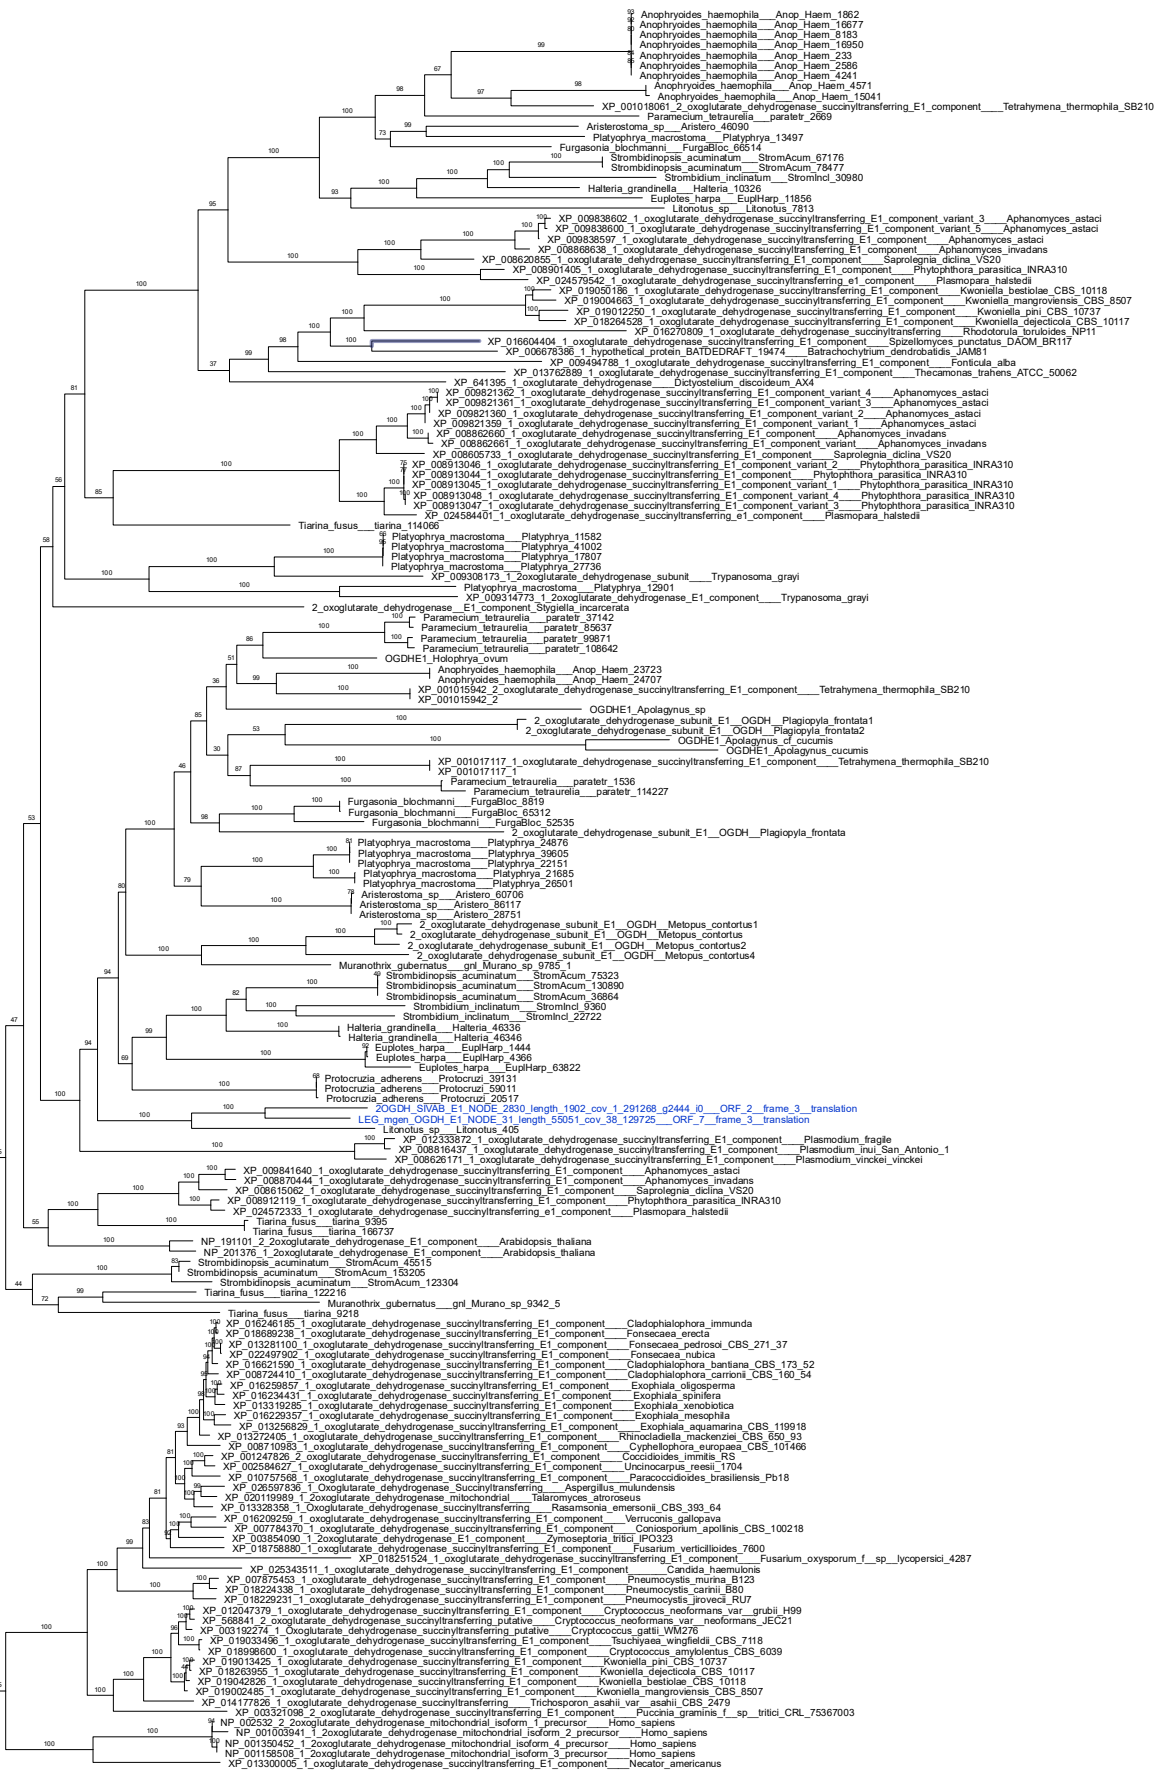

OGDHE2 -

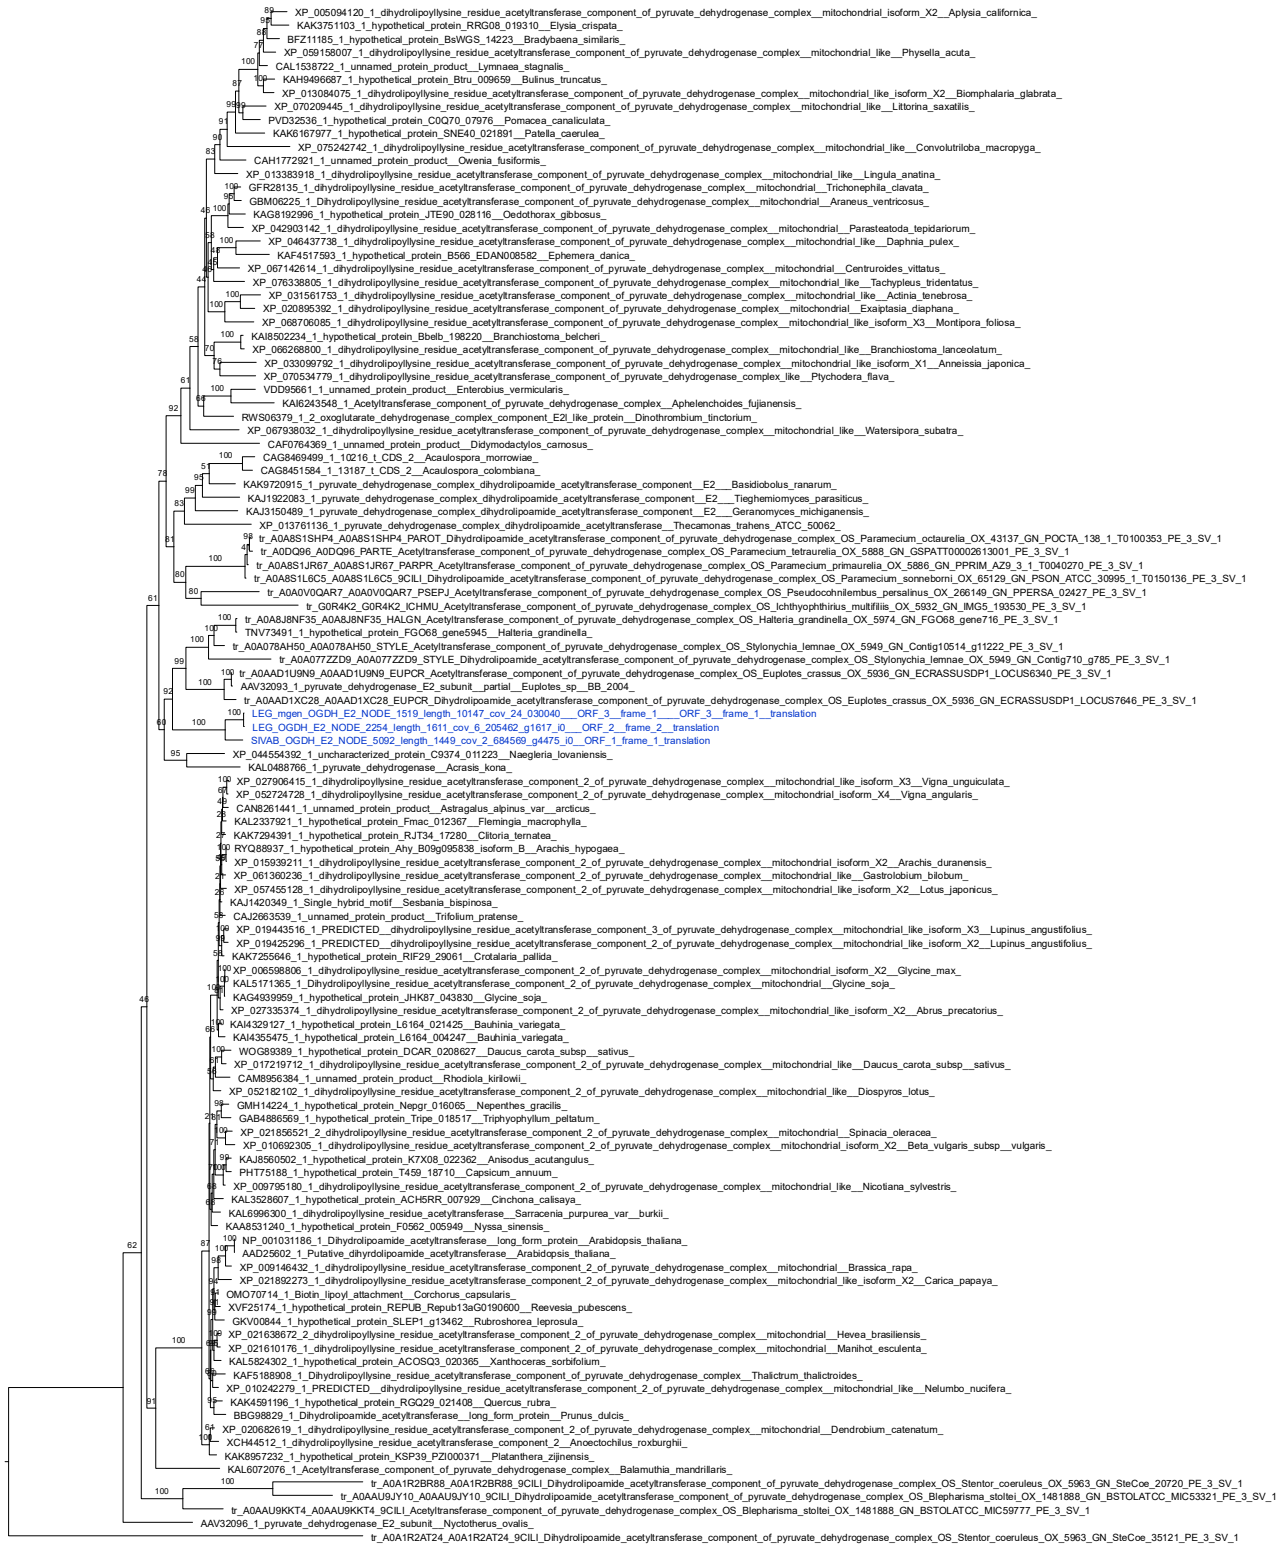





# PDHE1A – Pyruvate dehydrogenase E1A

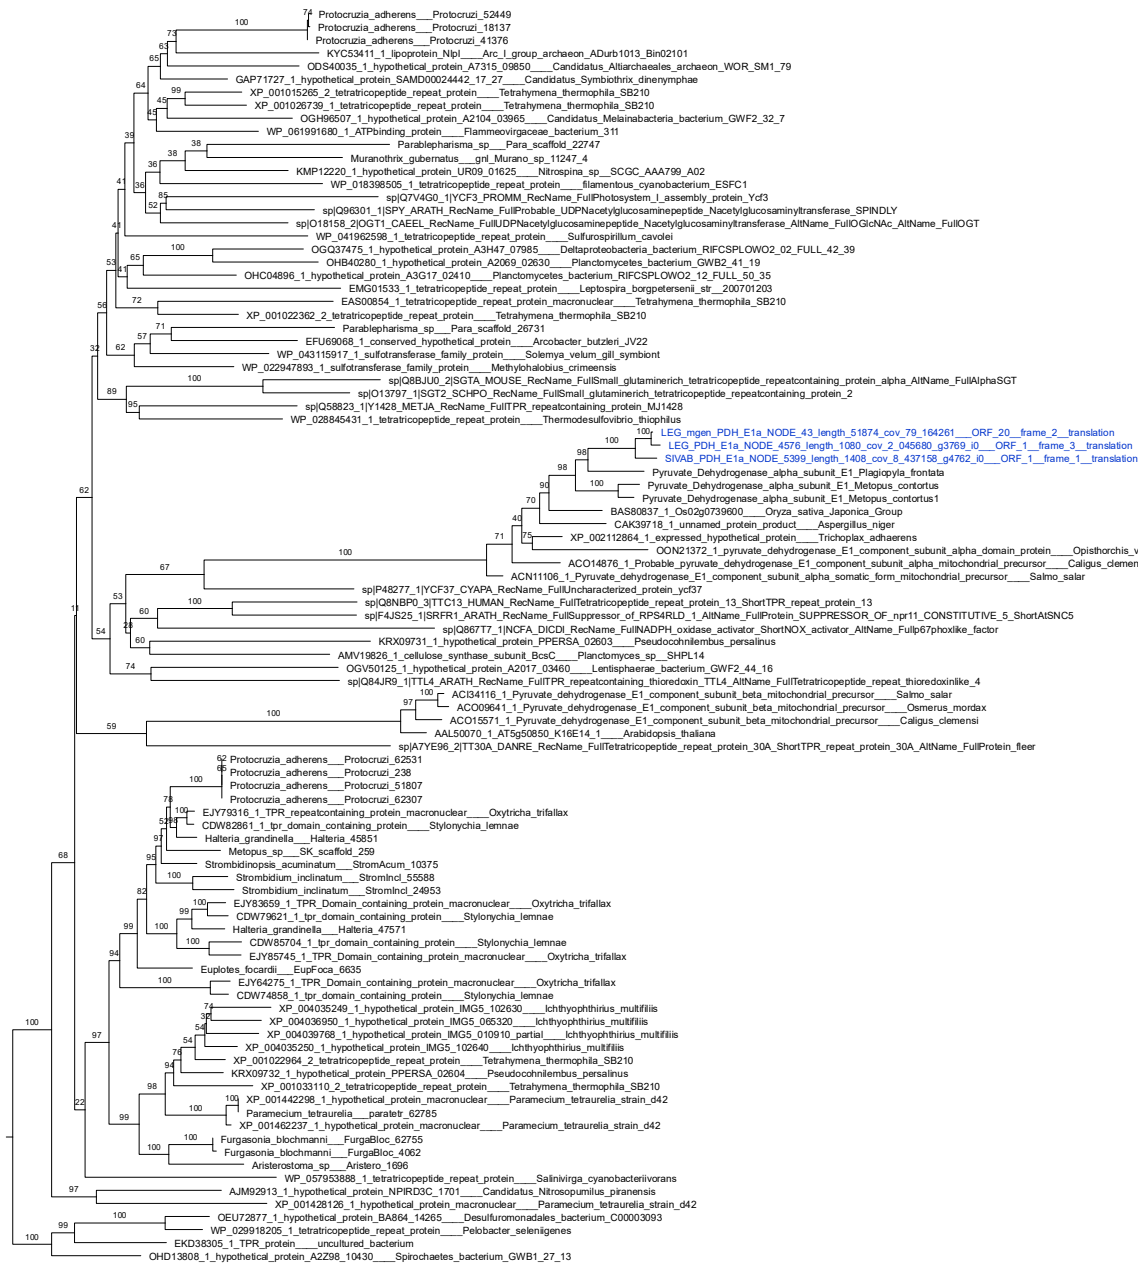

0.4



# PDHE2 – Pyruvate dehydrogenase E2

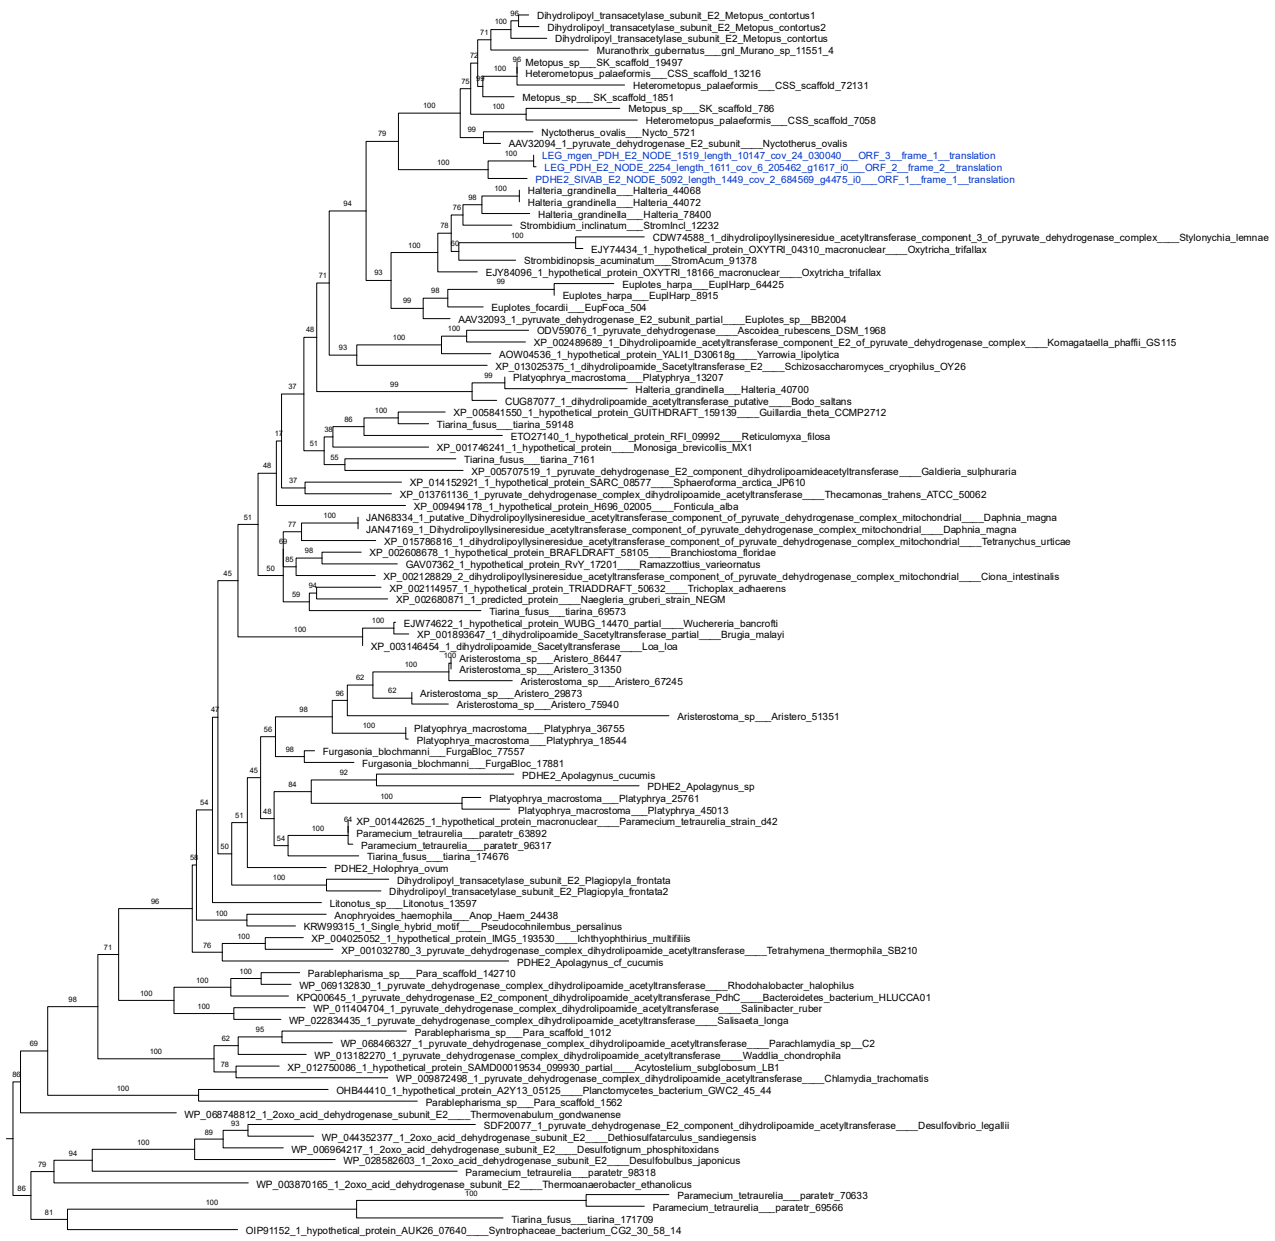



PGM -

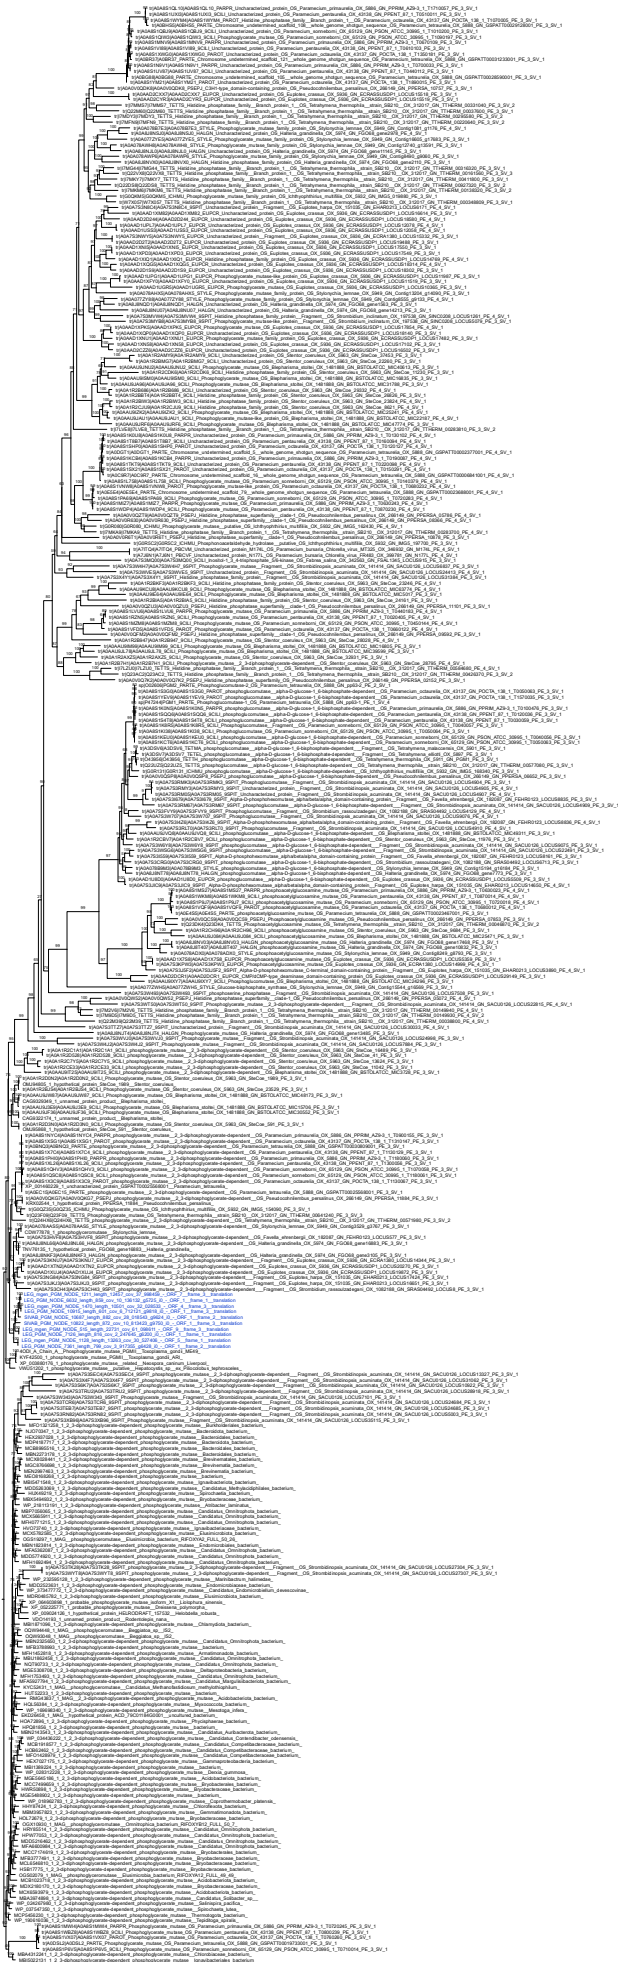



# PRODH - proline dehydrogenase

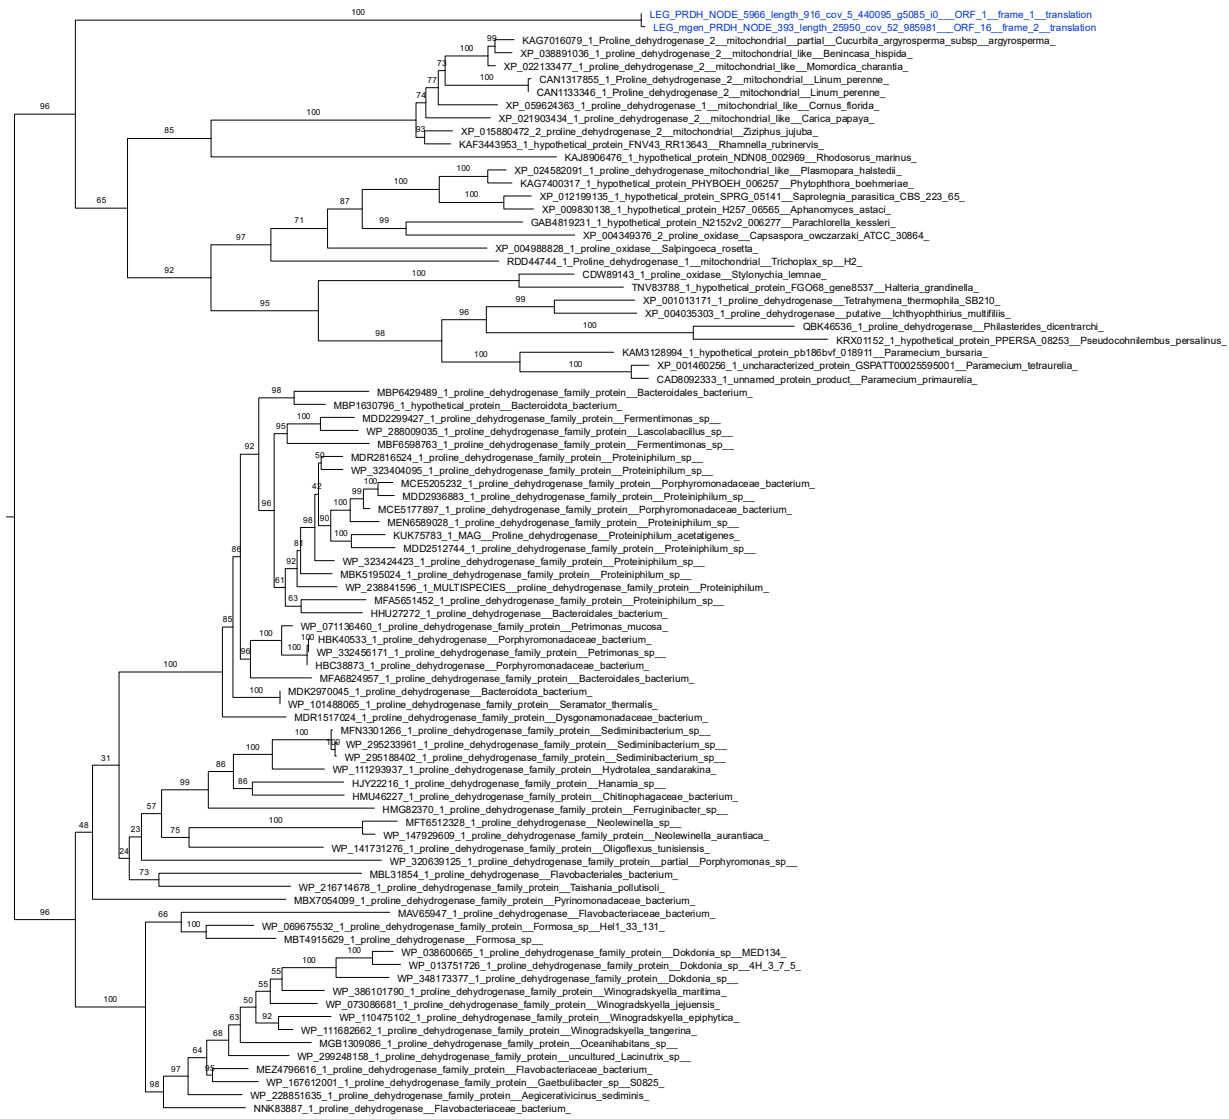

0.3

# PRX – peroxiredoxin

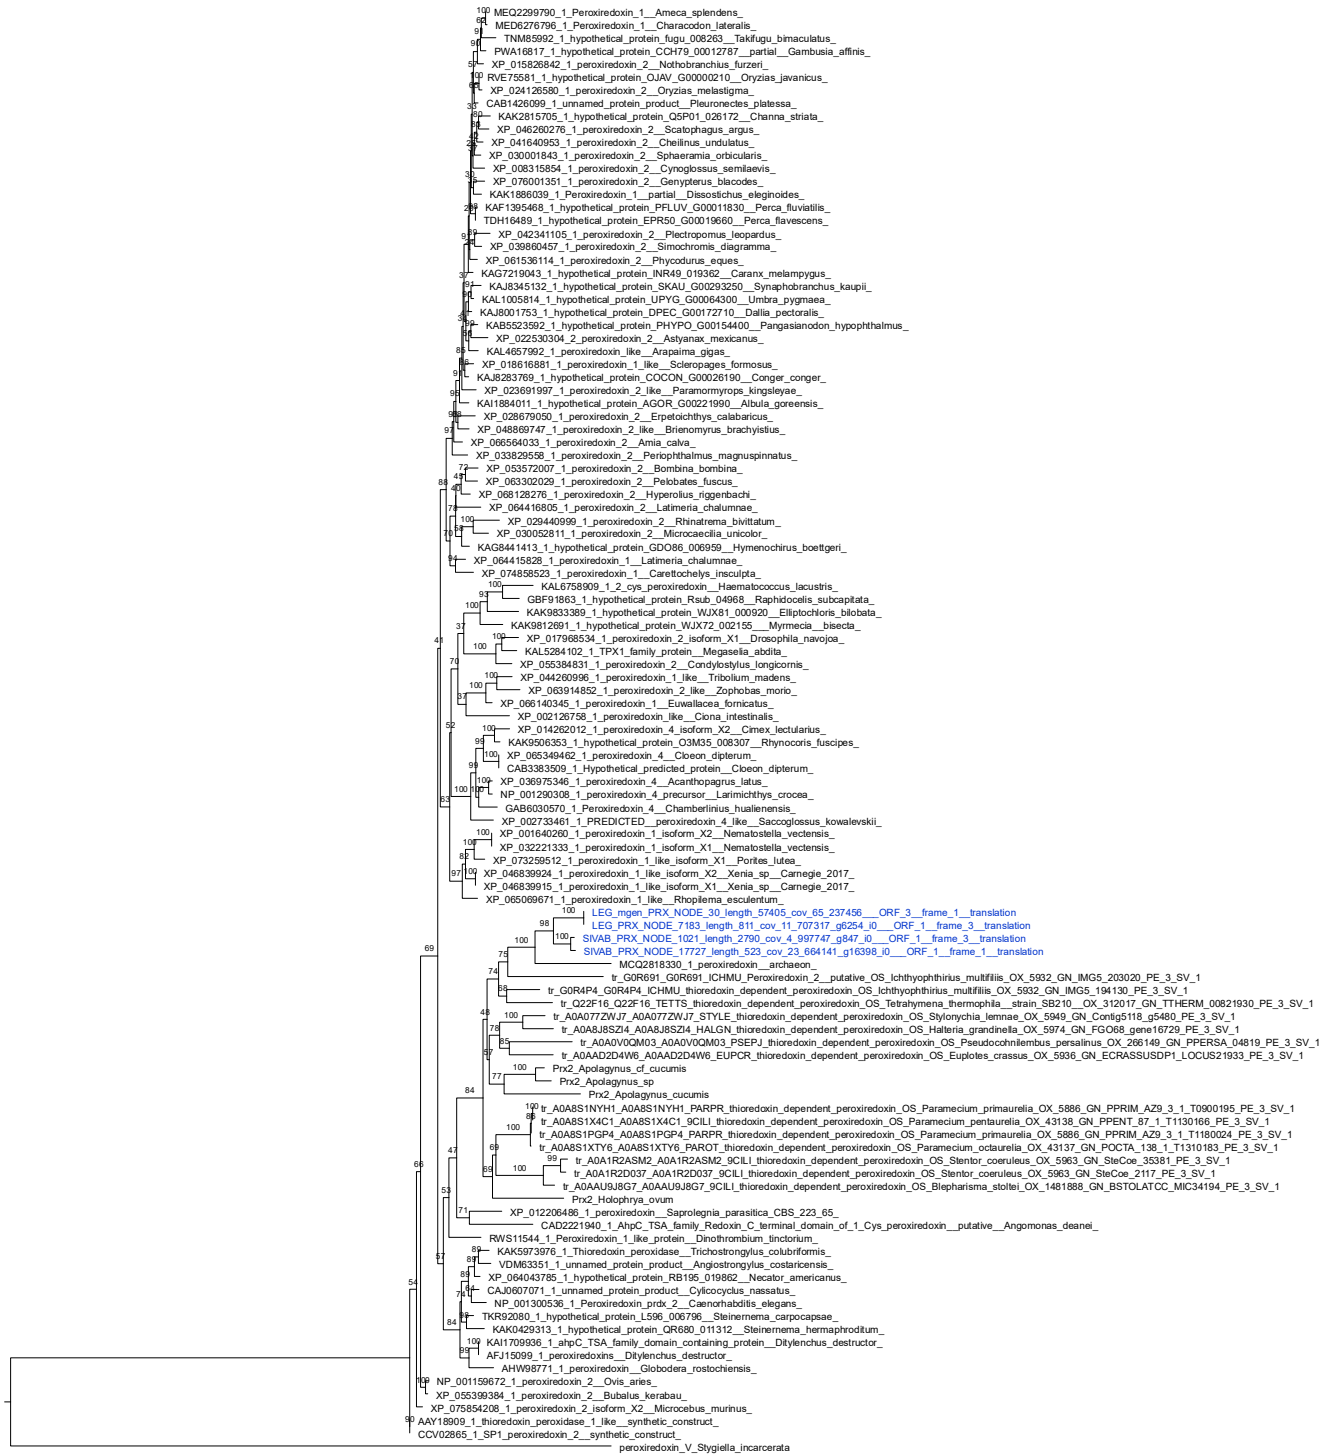



# SCSb - succinyl-CoA synthetase B

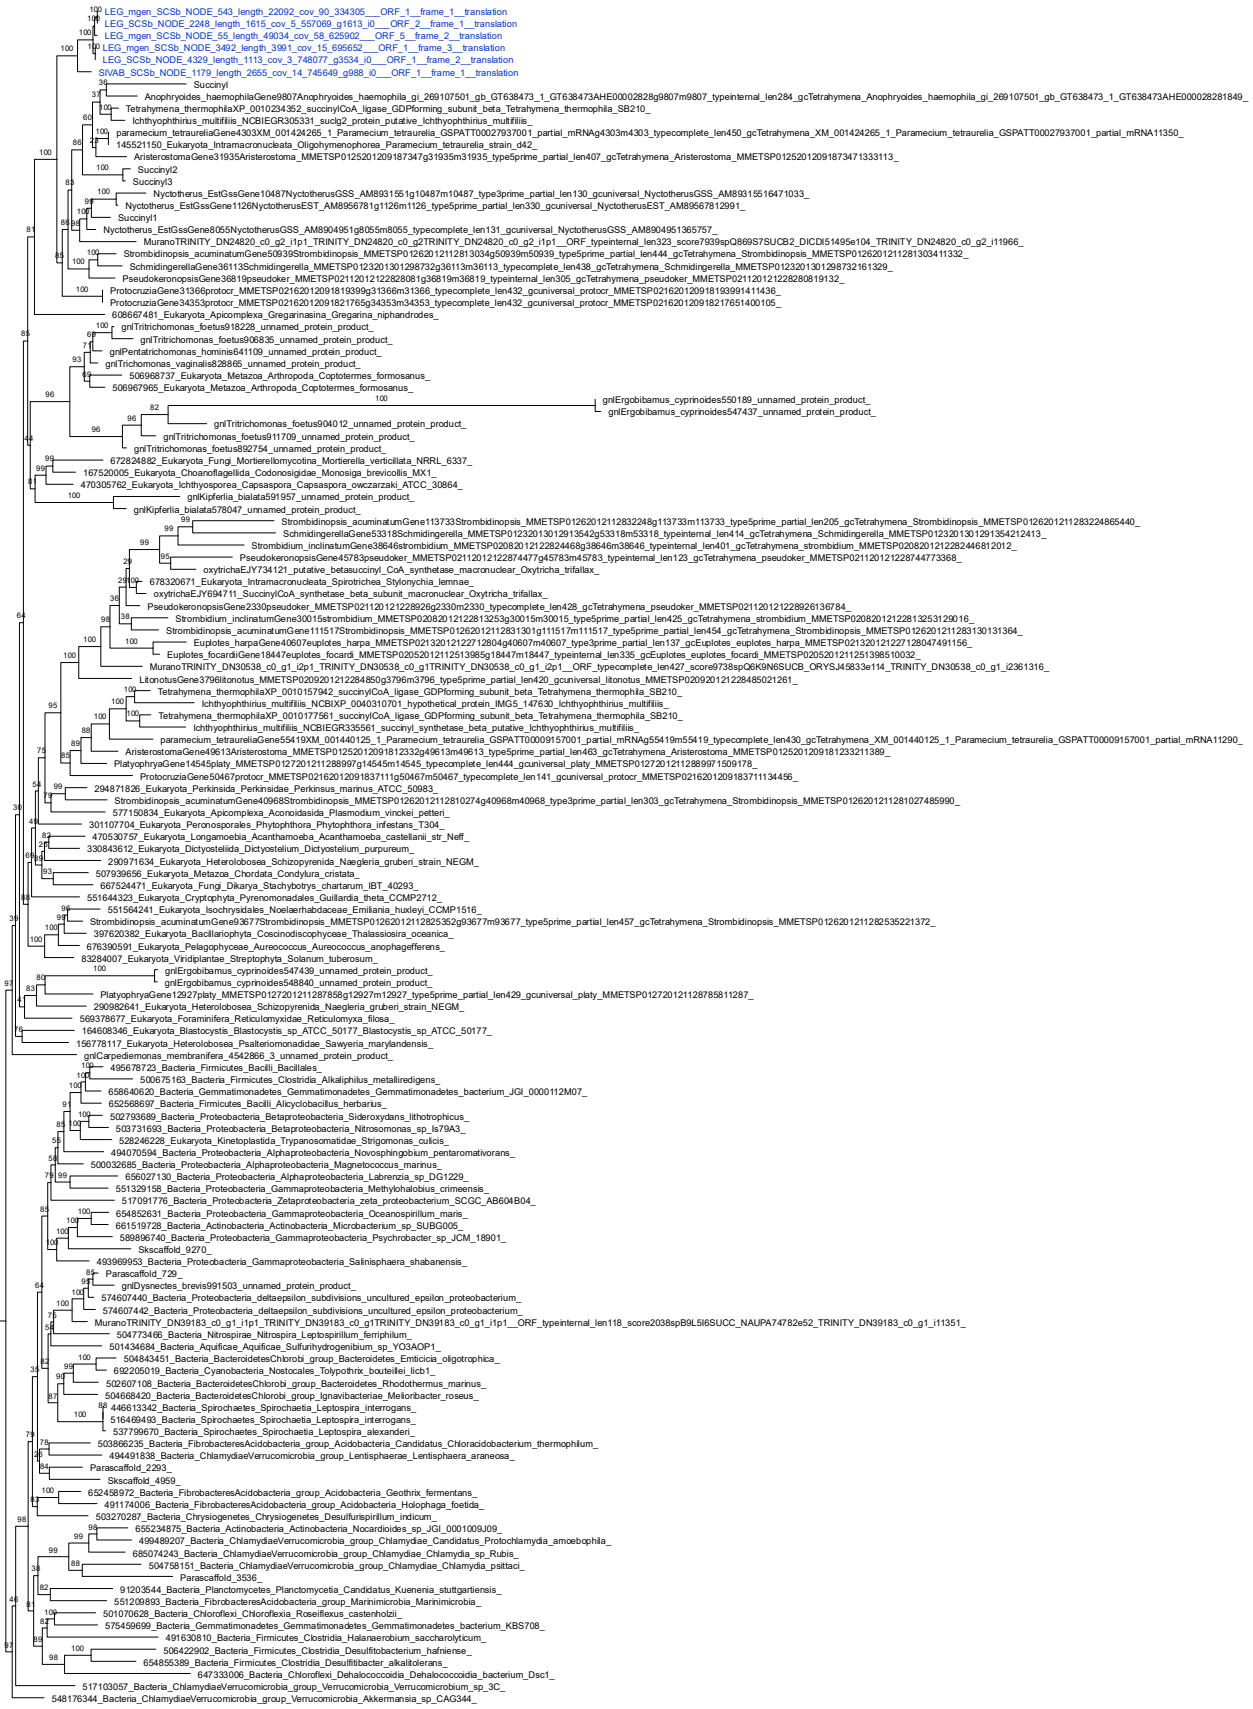

SDH –

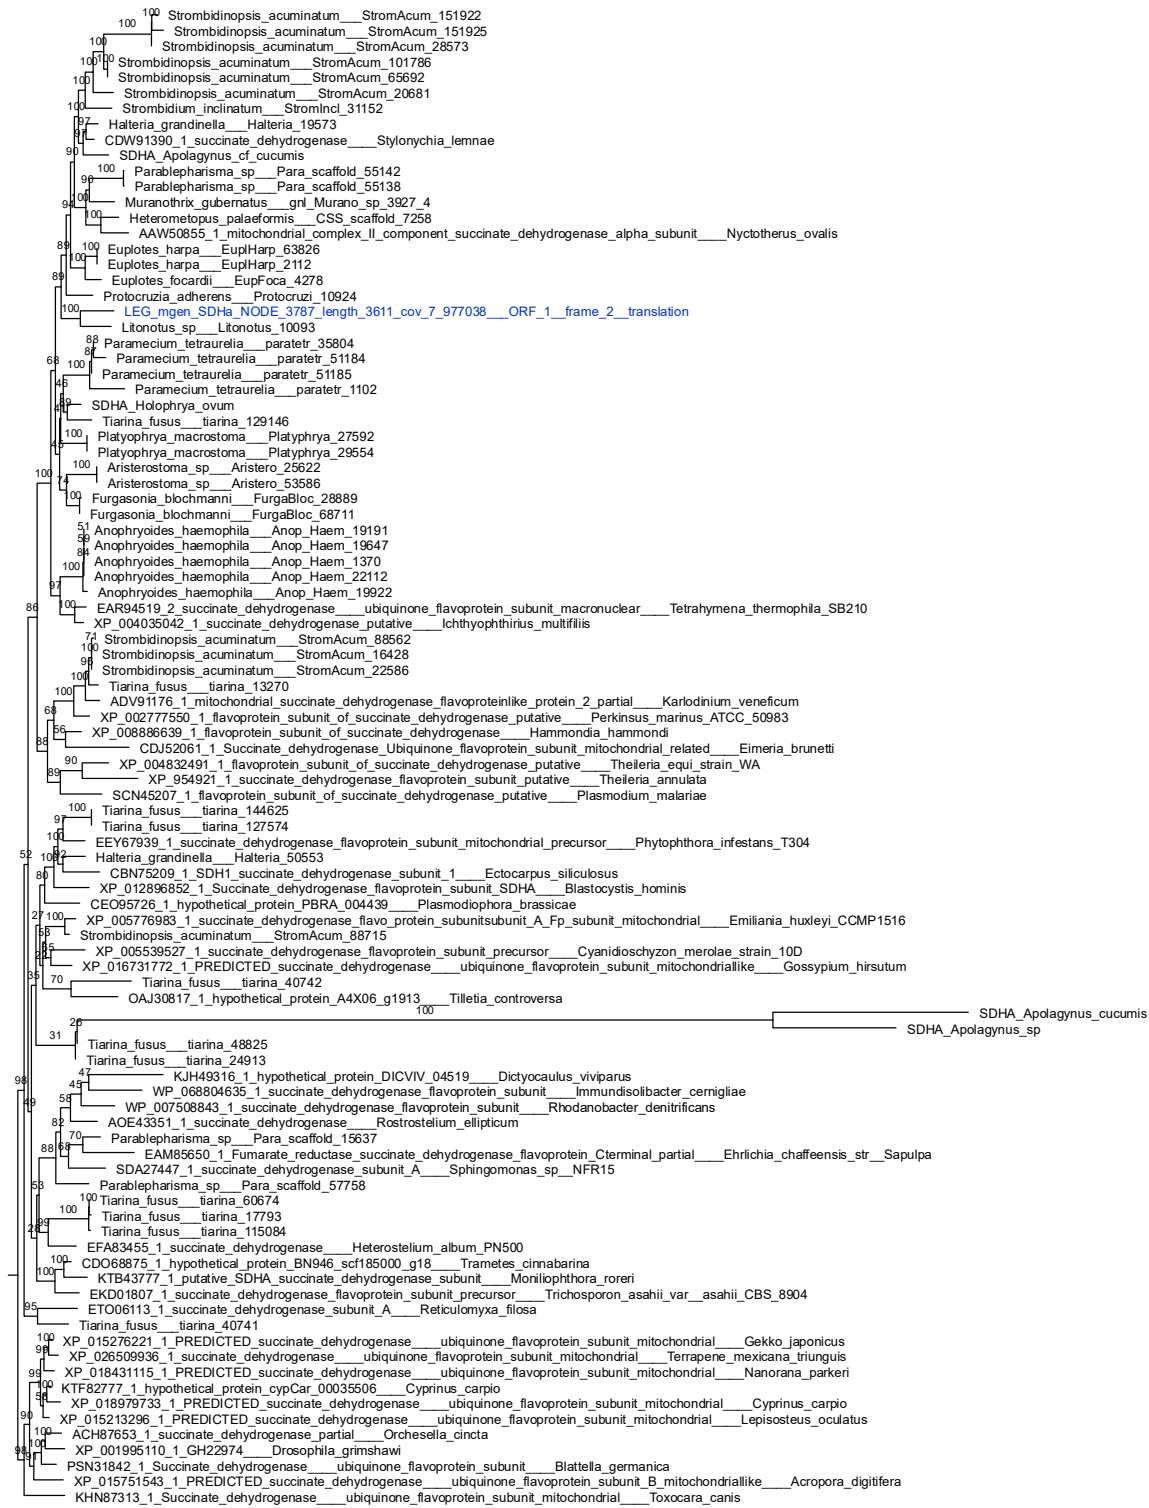

SDR

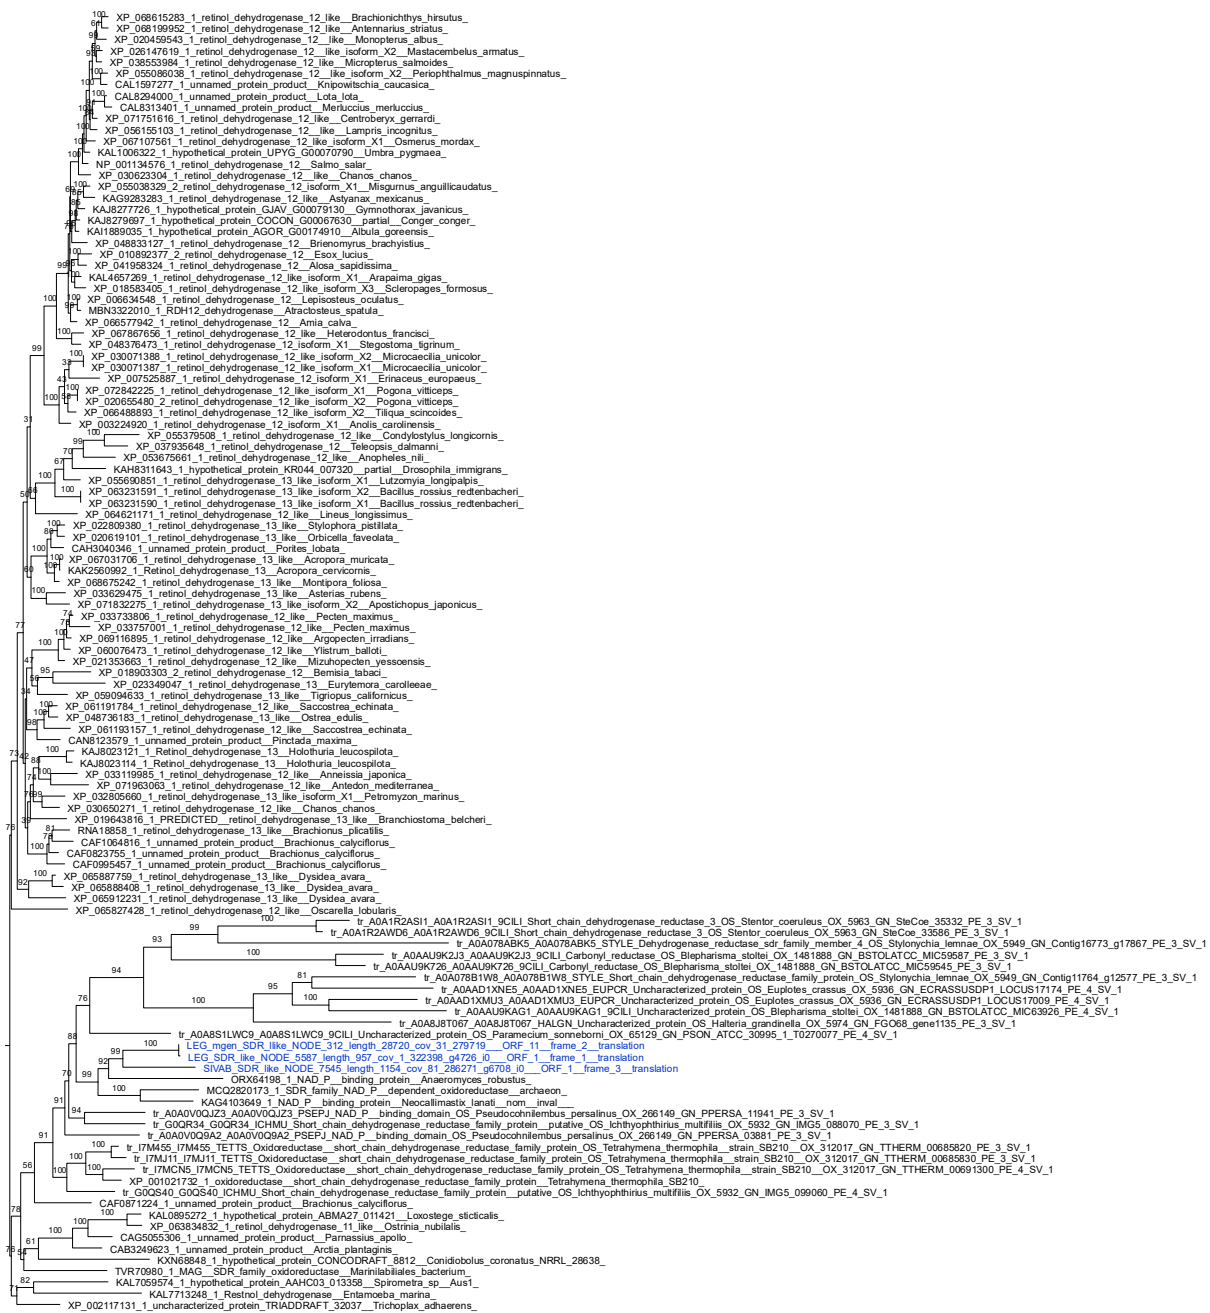

# SOD – superoxide dismutase

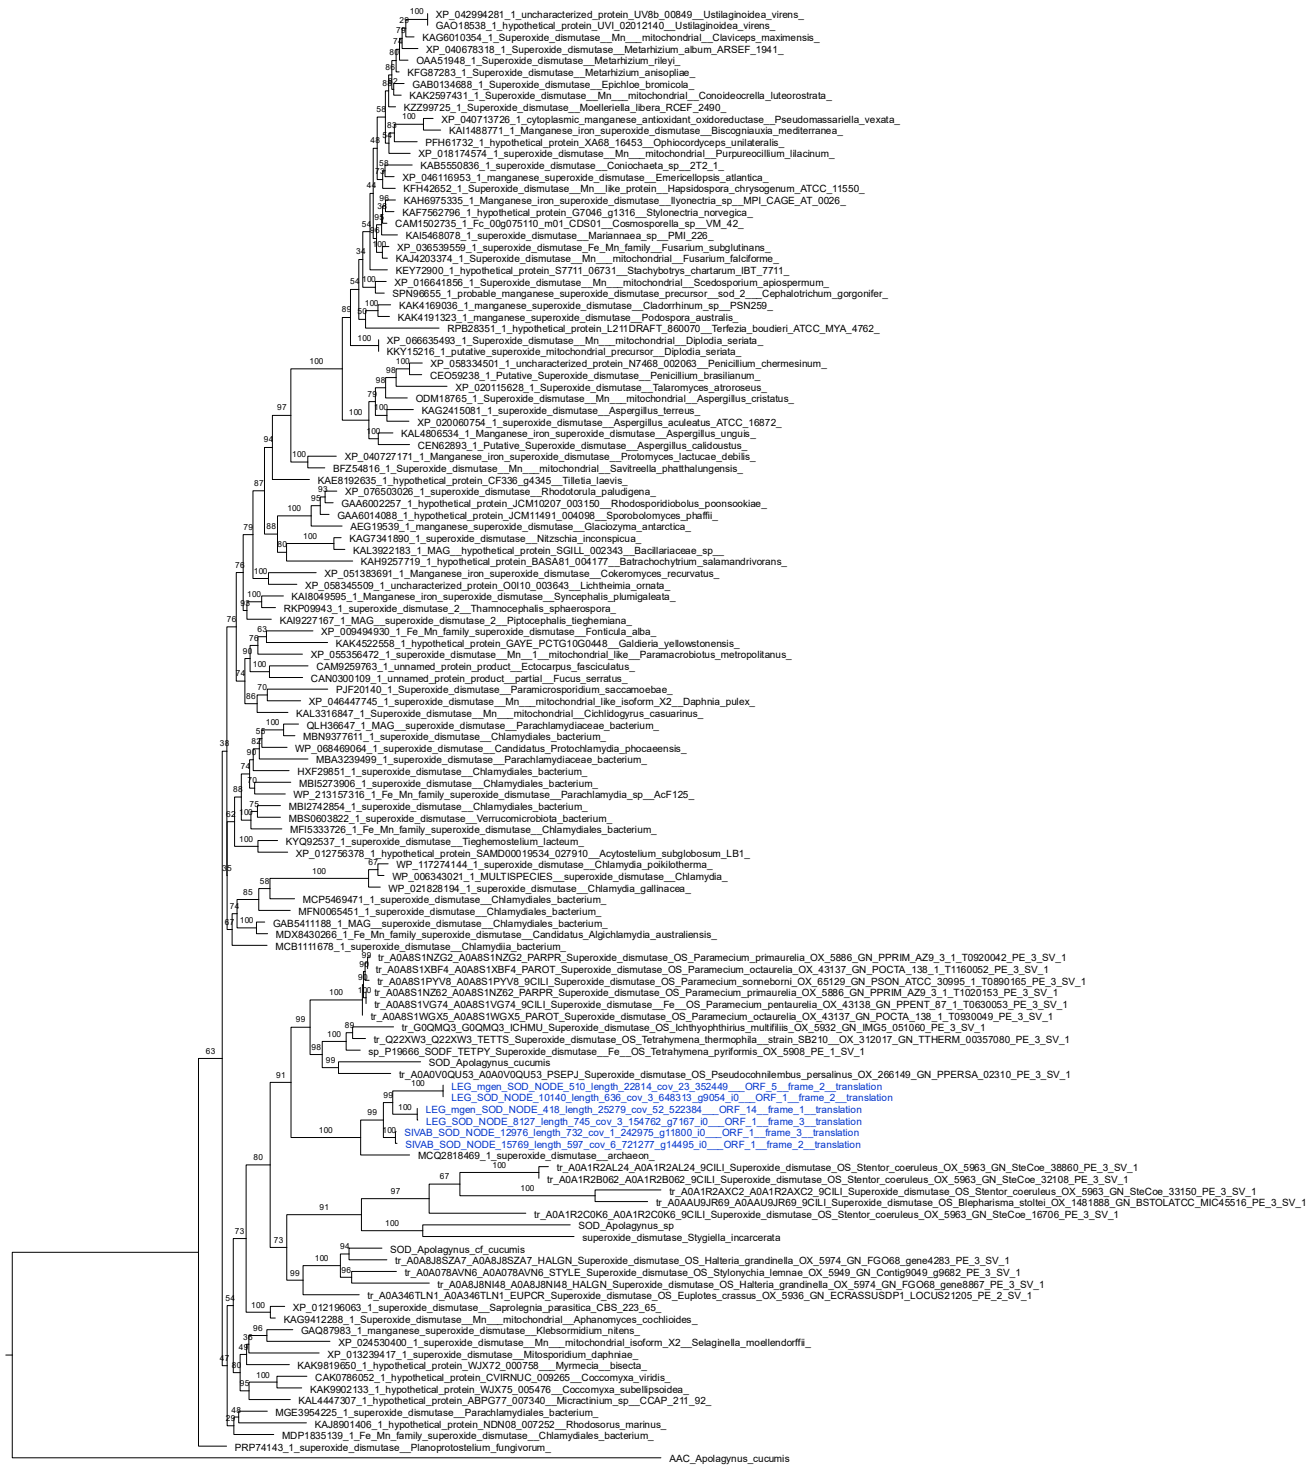

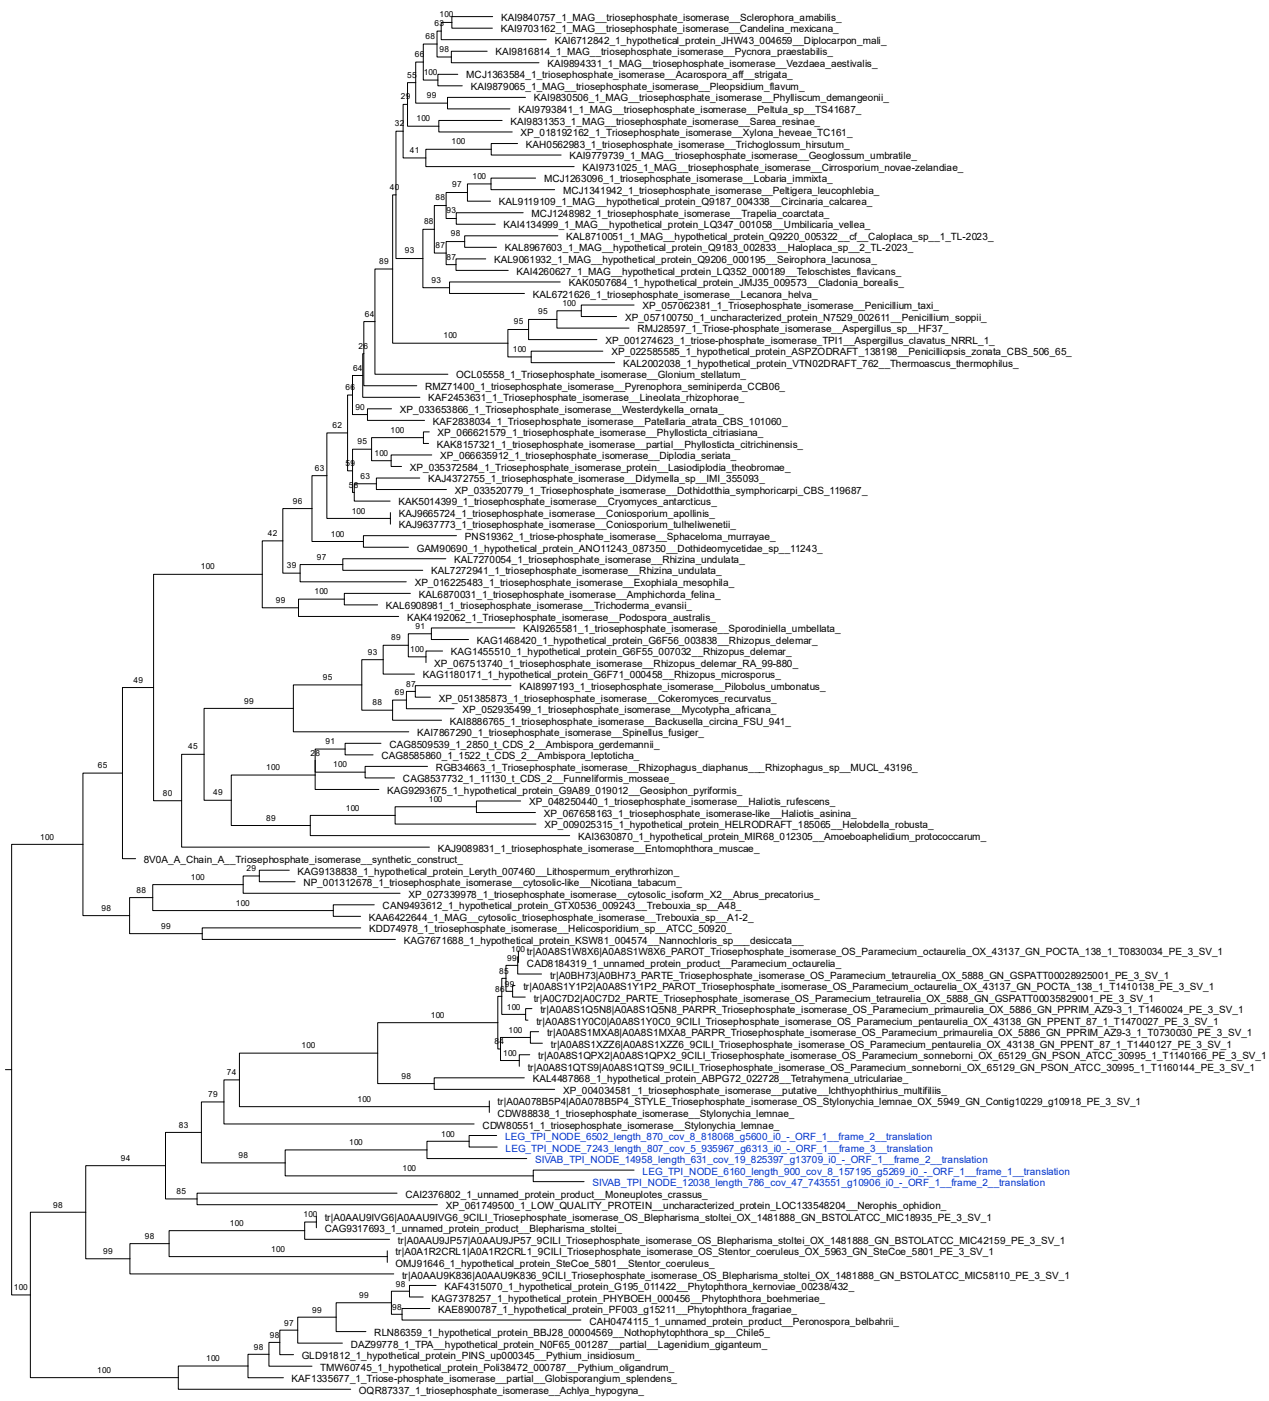

0.2

# Transmembrane proteins

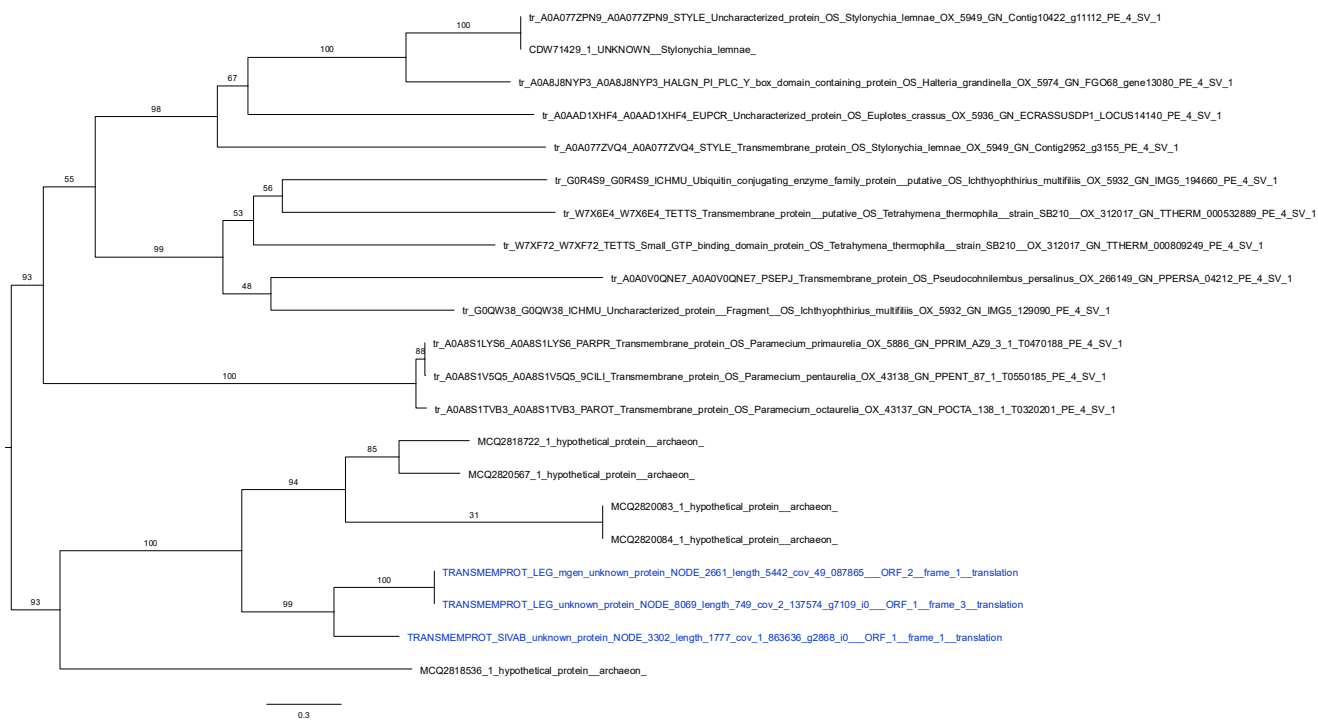

Supplement: Supplementary file 2 [file 804ad69389d3b01ddb615761.pdf]
