# Supplementary material
Source: Research Square preprint supplement (doi:10.21203/rs.3.rs-8743768/v1)
Supplement: Supplementary file 1 [file 38833fd7e713e090a18a0b6e.pdf]

## Supplementary Materials

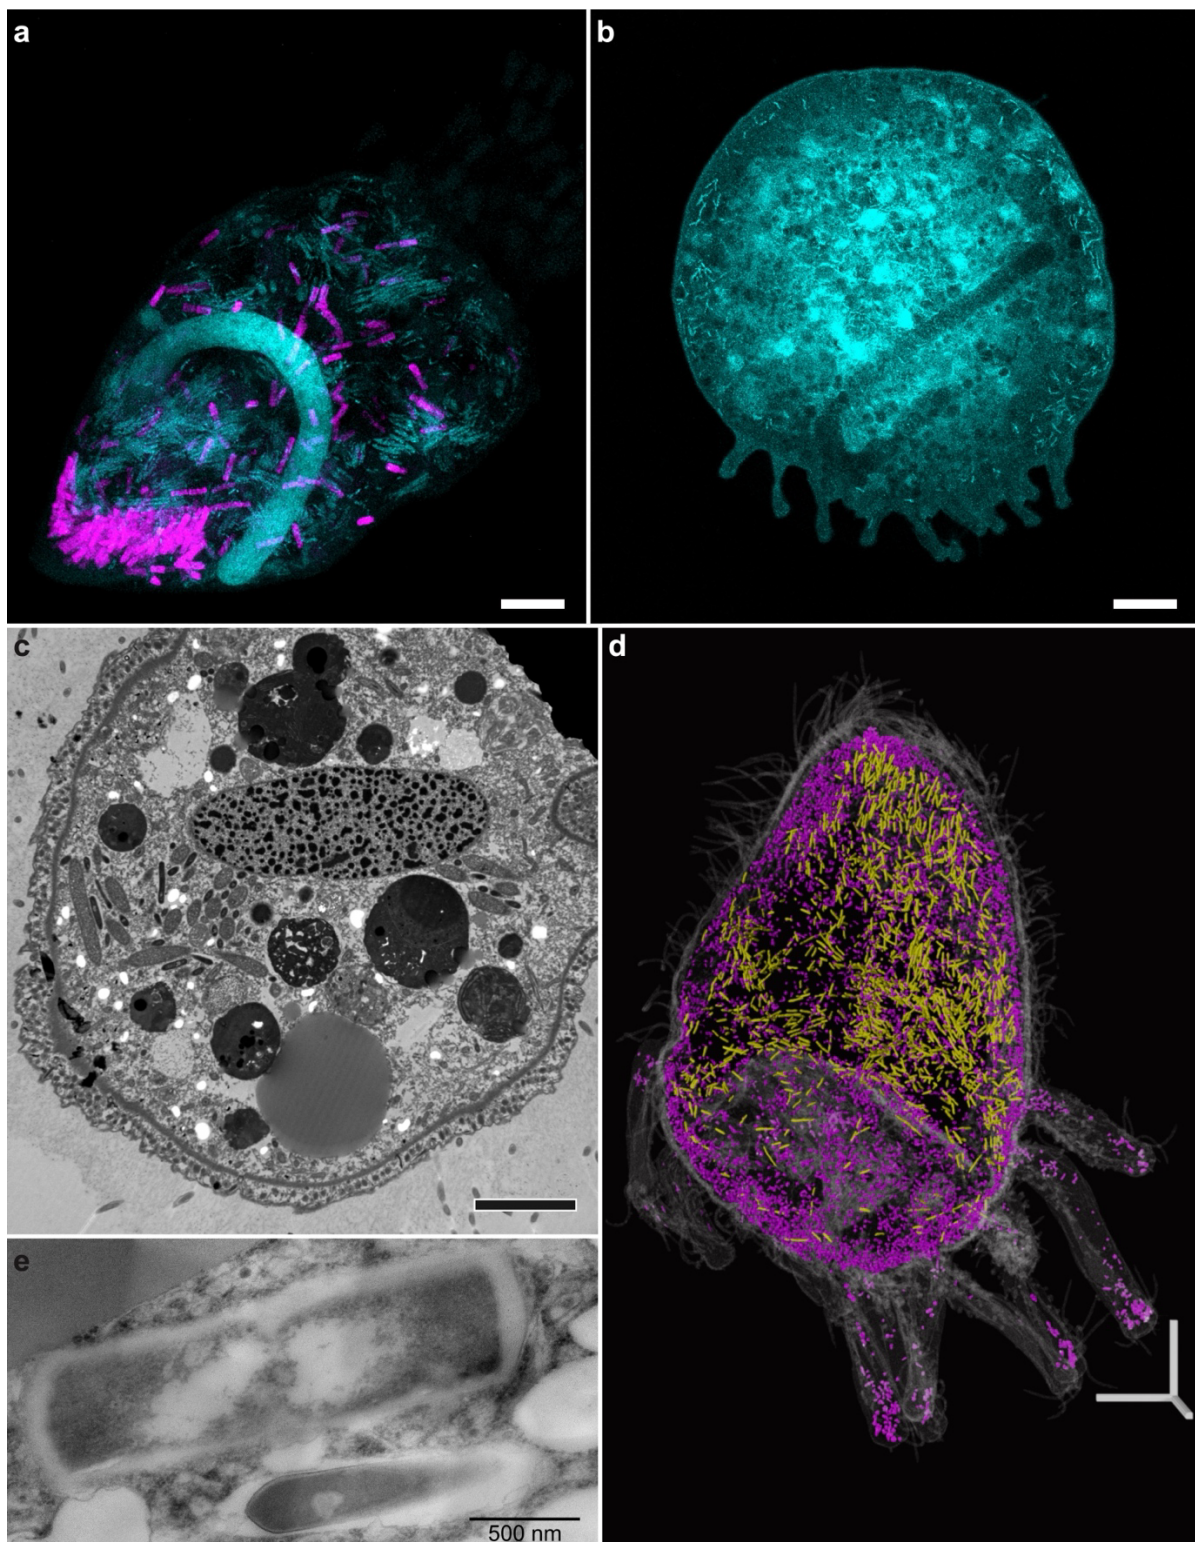

**Fig. S1. Methanogenic symbionts of *Legendrea loyzeae*.** (a) FISH signal of *Ca. Methanotherix pelomyxae* (archaeal probe with DAPI staining). (b) Autofluorescence of clustered *Methanobacterium* sp. endosymbiont. (c) TEM showing spatial distribution of symbionts in the cytoplasm. (d) 3D FIB-SEM reconstruction showing the distribution of the new type of MROs (purple) and *Methanobacterium* sp. endosymbiont (yellow). (e) TEM

showing the ultrastructure of *Ca. Methanotherix pelomyxae* (above) and *Methanobacterium* sp. (below) symbionts. Scale bars: A, B, D 10  $\mu\text{m}$ , C 5  $\mu\text{m}$ .

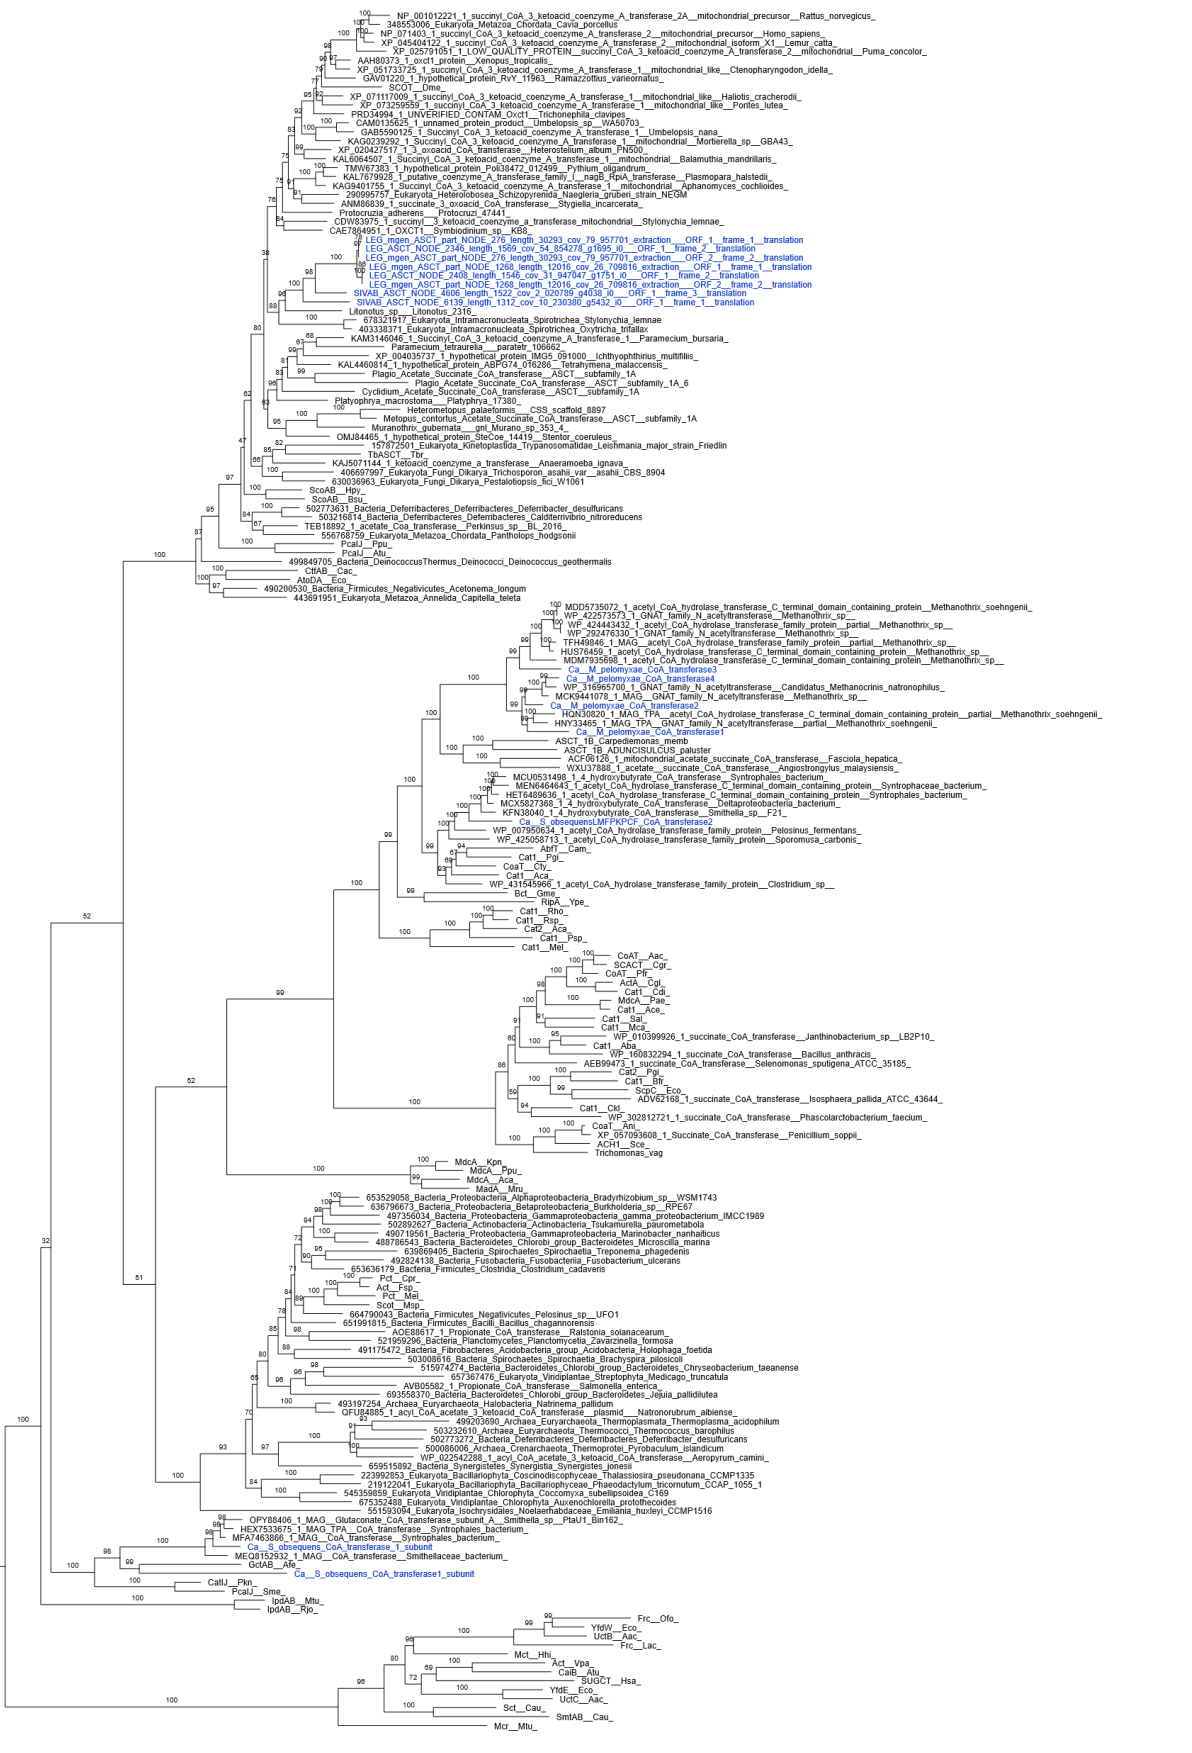

Fig. S2. RAxML phylogenetic tree of CoA-transferases.

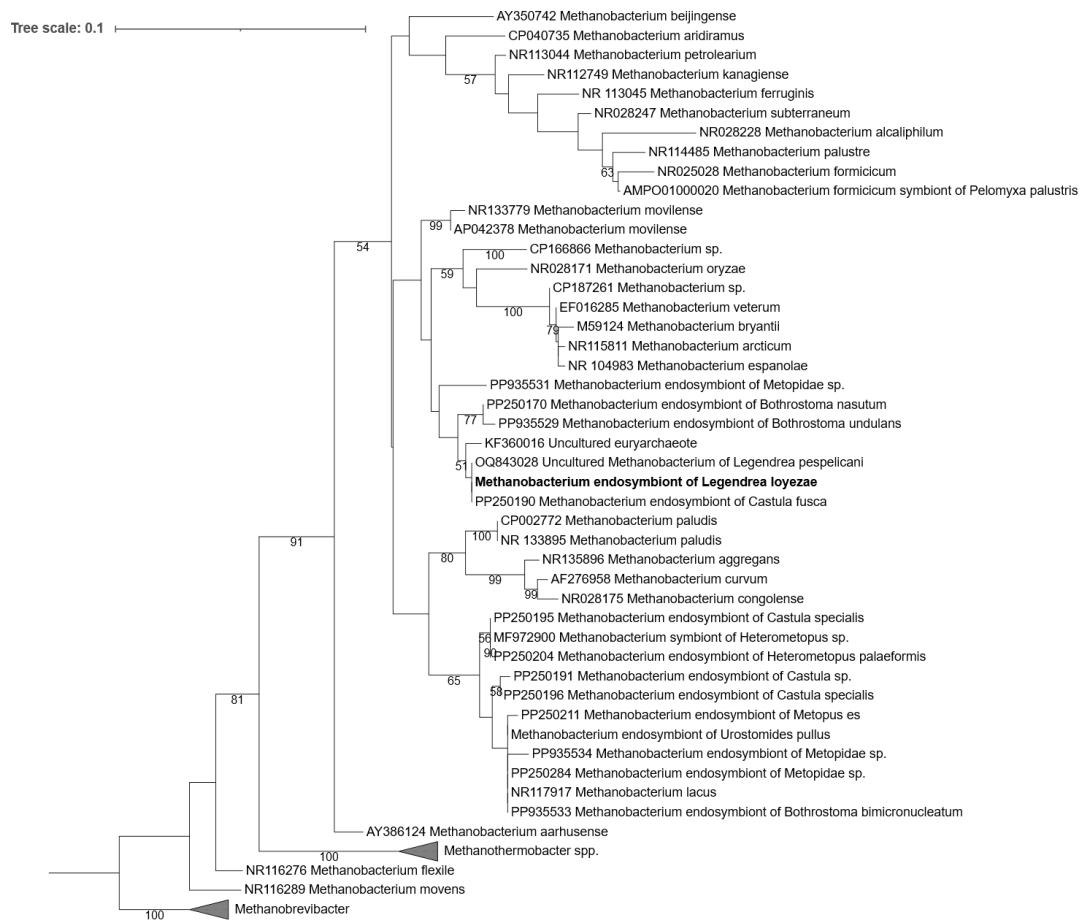

**Fig. S3.** RAxML phylogenetic tree based on 16S rRNA gene showing the position of *Methanobacterium* sp. symbiont from *Legendrea loyezae*.

Tree scale: 0.1

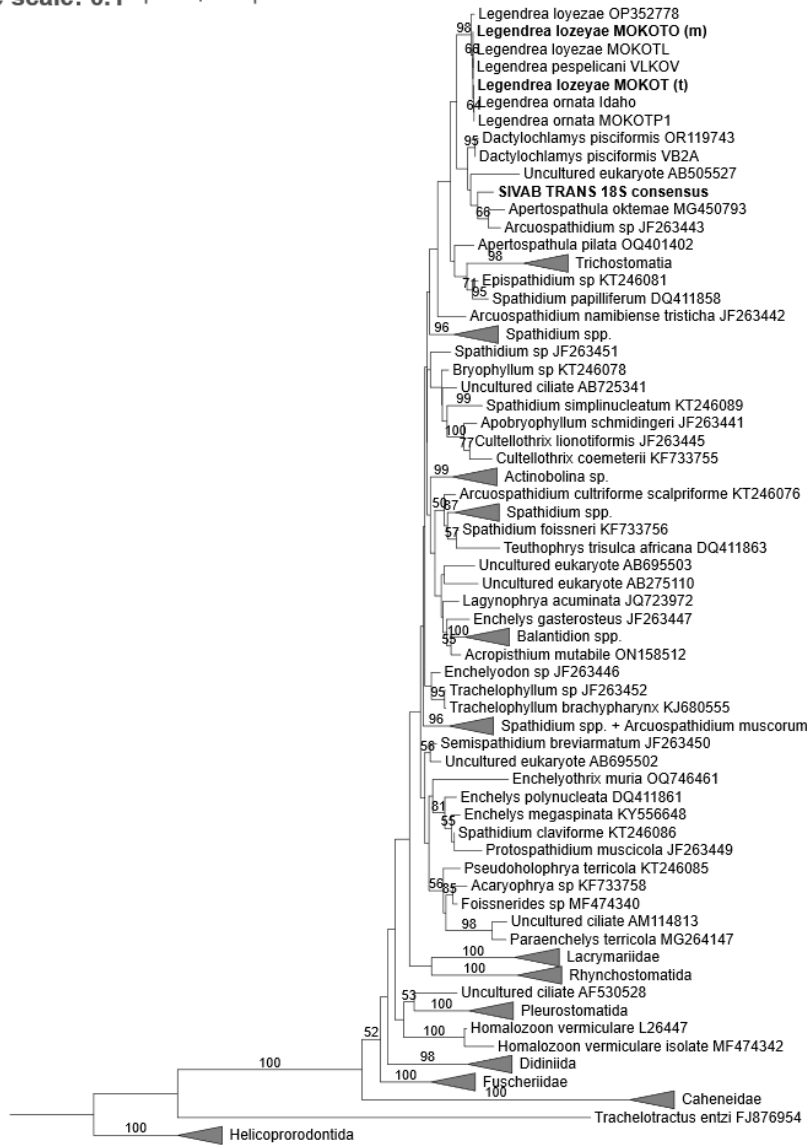

**Fig. S4.** RAxML phylogenetic tree based on 18S rRNA gene showing the relationship of *Legendrea loyzeae* and the SIVAB ciliate.

*Legendrea loyezae*

| Cells used (11) | Method           | Strain             |
|-----------------|------------------|--------------------|
| 3               | TRANSCRIPTOME    | MOKOT              |
| 2               | METAGENOME       | MOKOT              |
| 1               | TEM              | MOKOT              |
| 1               | FIB-SEM          | MOKOT              |
| 3               | FISH             | MOKOT (2), 7TL (1) |
| 1               | Autofluorescence | MOKOT              |

*Spathidium* sp.

| Cells used (3) | Method        | Strain |
|----------------|---------------|--------|
| 3              | TRANSCRIPTOME | SIVAB  |

| Strain | Habitat          | Locality                                          | Coordiantes              |
|--------|------------------|---------------------------------------------------|--------------------------|
| MOKOT  | hypoxic sediment | Small pond, Modřany, Prague, Czechia              | 49.9901275N, 14.4012394E |
| 7TL    | hypoxic sediment | Uni-Fleet-Süd, University campus, Bremen, Germany | 53.1072294N, 8.8463003E  |
| SIVAB  | hypoxic sediment | Travertine spring pool, Sivá Brada, Slovakia      | 49.0064050N, 20.7229667E |

**Table S5.** Cells of *Legendrea loyezae* used in this study, strains, and localities.

**In individual files:**

**Fig. S5.** Mitochondrial-related organelle (MRO) single protein trees collection.

**Table S1.** Spatial analysis of pairwise distances between prokaryotic symbionts.

**Table S2.** Contaminants in metagenomic and transcriptomic data.

**Table S3.** Annotated putative *Methanobacterium* sp. proteins involved in methanogenesis

**Table S4.** *Legendrea loyezae* and SIVAB MRO-targeting prediction tables

**Movie S1.** FIB-SEM based 3D model of *Legendrea loyezae* and their prokaryotic symbionts. FIB-SEM 3D model of *Legendrea loyezae* and their prokaryotic symbionts. Ca. *Methanotherix pelomyxae* (red), Ca. *Syntrophilus obsequens* (blue), *Methanobacterium* sp. (yellow), Ca. *Xociella bifrons* (green), mitochondrion-related organelle (purple), macronucleus (light blue), and oral basket (black). Scale bar: 10  $\mu$ m.
