# Supplementary material
Source: Research Square preprint supplement (doi:10.21203/rs.3.rs-8743768/v1)
Supplement: Supplementary file 1 [file 80731bc3b77b68ce6131bf31.xlsx]

## Sheet: Legend
Table S1. Spatial statistic analysis of the symbiotic consortium
Legend:
B	Methanobacterium sp.
C	Ca. Xociella bifrons
S	Ca. Syntrophilus obsequens
T	Ca. Methanothrix pelomyxae
NND	Nearest-neighbor distance
CSR test	If one symbiont is co-located in the same zone with another comapre to random spatial distribution.
Monte Carlo permutaion test	If one symbiont preferentially approaches another.
median log distance test	How close two symbionts actually are in space (absolute spatial proximity).
winner fraction test	How often one symbiont is closer to another than expected under random labeling.

## Sheet: NND_Attraction_Results
NND Attraction analysis results
focal	target	n_rows	stat	observed	perm_mean	perm_sd	p_perm	q_perm	csr_mean	csr_sd	csr_q025	csr_q975	p_csr	q_csr	ratio_obs_to_csr	expl
B	S	2970	median_log_distance	1.53013540	3.04278460	0.02529778	0.00009999	0.00029997	3.89127939	0.01065043	3.86968670	3.91193569	0.00099900	0.00099900	0.09431227	attraction (smaller)
B	C	2970	median_log_distance	3.34030532	3.04260858	0.02522948	1.00000000	1.00000000	3.76563682	0.01015998	3.74599423	3.78653596	0.00099900	0.00099900	0.65355310	attraction (smaller)
B	T	2970	median_log_distance	3.40119738	3.04306319	0.02553253	1.00000000	1.00000000	4.08227808	0.01165806	4.05966847	4.10514268	0.00099900	0.00099900	0.50606979	attraction (smaller)
C	B	874	median_log_distance	2.50190949	3.07240878	0.04529827	0.00009999	0.00029997	3.35060373	0.01714753	3.31667571	3.38258808	0.00099900	0.00099900	0.42797340	attraction (smaller)
C	S	874	median_log_distance	2.89684459	3.07235511	0.04551986	0.00029997	0.00071993	3.89116709	0.01826606	3.85586486	3.92828554	0.00099900	0.00099900	0.36997402	attraction (smaller)
C	T	874	median_log_distance	3.91282237	3.07186667	0.04540378	1.00000000	1.00000000	4.08278325	0.01914638	4.04415168	4.11926132	0.00099900	0.00099900	0.84369782	attraction (smaller)
S	B	605	median_log_distance	0.81808939	2.03709720	0.12093199	0.00009999	0.00029997	3.35019621	0.02079626	3.31003107	3.39043819	0.00099900	0.00099900	0.07949137	attraction (smaller)
S	C	605	median_log_distance	2.73248434	2.03716241	0.11957701	1.00000000	1.00000000	3.76480592	0.02113499	3.72149250	3.80551445	0.00099900	0.00099900	0.35617910	attraction (smaller)
S	T	605	median_log_distance	3.24443103	2.03934077	0.11991205	1.00000000	1.00000000	4.08377748	0.02125110	4.04000557	4.12595202	0.00099900	0.00099900	0.43199276	attraction (smaller)
T	B	346	median_log_distance	1.41143012	2.29237653	0.10266768	0.00009999	0.00029997	3.34910116	0.02594853	3.29670706	3.40095878	0.00099900	0.00099900	0.14403902	attraction (smaller)
T	C	346	median_log_distance	3.38821048	2.29515873	0.10245081	1.00000000	1.00000000	3.76581895	0.02794426	3.71274817	3.81916992	0.00099900	0.00099900	0.68549884	attraction (smaller)
T	S	346	median_log_distance	2.71557825	2.29399772	0.10390222	0.99980002	1.00000000	3.89123964	0.02722734	3.83958732	3.94678516	0.00099900	0.00099900	0.30861480	attraction (smaller)
B	S	2970	winner_fraction	0.64377104	0.33333721	0.00869492	0.00009999	0.00029997	0.33131044	0.01030825	0.31245791	0.35151515	0.00099900	0.00299700	1.94310523	enrichment (more often closest)
B	T	2970	winner_fraction	0.22323232	0.33322732	0.00858161	1.00000000	1.00000000	0.18986768	0.00838636	0.17440236	0.20707912	0.00099900	0.00299700	1.17572578	enrichment (more often closest)
B	C	2970	winner_fraction	0.13299663	0.33331535	0.00875578	1.00000000	1.00000000	0.47882189	0.01086838	0.45824074	0.49968855	1.00000000	1.00000000	0.27775805	enrichment (more often closest)
C	S	874	winner_fraction	0.30091533	0.33343833	0.01591138	0.97700230	1.00000000	0.15464989	0.01297453	0.13043478	0.17966247	0.00099900	0.00299700	1.94578438	enrichment (more often closest)
C	T	874	winner_fraction	0.11212815	0.33329291	0.01598989	1.00000000	1.00000000	0.08780320	0.00964929	0.06864989	0.10755149	0.00999001	0.01998002	1.27703935	enrichment (more often closest)
C	B	874	winner_fraction	0.58695652	0.33330881	0.01615995	0.00009999	0.00029997	0.75754691	0.01498079	0.72768879	0.78604119	1.00000000	1.00000000	0.77481211	enrichment (more often closest)
S	B	605	winner_fraction	0.88925620	0.33367529	0.01911387	0.00009999	0.00029997	0.70798017	0.01888794	0.67107438	0.74545455	0.00099900	0.00299700	1.25604677	enrichment (more often closest)
S	C	605	winner_fraction	0.07272727	0.33308917	0.01886734	1.00000000	1.00000000	0.20932231	0.01692769	0.17685950	0.24132231	1.00000000	1.00000000	0.34744157	enrichment (more often closest)
S	T	605	winner_fraction	0.03801653	0.33347380	0.01903665	1.00000000	1.00000000	0.08269752	0.01154658	0.06115702	0.10578512	1.00000000	1.00000000	0.45970579	enrichment (more often closest)
T	B	346	winner_fraction	0.72543353	0.33291734	0.02537609	0.00009999	0.00029997	0.66813006	0.02547434	0.61849711	0.71676301	0.00999001	0.01998002	1.08576694	enrichment (more often closest)
T	S	346	winner_fraction	0.17341040	0.33296792	0.02557275	1.00000000	1.00000000	0.13608092	0.01875164	0.10115607	0.17341040	0.03496503	0.05994006	1.27431824	enrichment (more often closest)
T	C	346	winner_fraction	0.10115607	0.33343035	0.02531253	1.00000000	1.00000000	0.19578902	0.02098745	0.15606936	0.23988439	1.00000000	1.00000000	0.51665855	enrichment (more often closest)
Median log distance test
focal	target	n_rows	stat	observed	perm_mean	perm_sd	p_perm	q_perm	expl
B	S	2970	median_log_distance	1.53013540	3.04278460	0.02529778	0.00009999	0.00029997	significantly attracted
C	B	874	median_log_distance	2.50190949	3.07240878	0.04529827	0.00009999	0.00029997	significantly attracted
S	B	605	median_log_distance	0.81808939	2.03709720	0.12093199	0.00009999	0.00029997	significantly attracted
T	B	346	median_log_distance	1.41143012	2.29237653	0.10266768	0.00009999	0.00029997	significantly attracted
C	S	874	median_log_distance	2.89684459	3.07235511	0.04551986	0.00029997	0.00071993	significantly attracted
T	S	346	median_log_distance	2.71557825	2.29399772	0.10390222	0.99980002	1.00000000
B	C	2970	median_log_distance	3.34030532	3.04260858	0.02522948	1.00000000	1.00000000
B	T	2970	median_log_distance	3.40119738	3.04306319	0.02553253	1.00000000	1.00000000
C	T	874	median_log_distance	3.91282237	3.07186667	0.04540378	1.00000000	1.00000000
S	C	605	median_log_distance	2.73248434	2.03716241	0.11957701	1.00000000	1.00000000
S	T	605	median_log_distance	3.24443103	2.03934077	0.11991205	1.00000000	1.00000000
T	C	346	median_log_distance	3.38821048	2.29515873	0.10245081	1.00000000	1.00000000
focal	target	n_rows	stat	observed	csr_mean	csr_sd	csr_q025	csr_q975	p_csr	q_csr	ratio_obs_to_csr	expl
S	B	605	median_log_distance	0.81808939	3.35019621	0.02079626	3.31003107	3.39043819	0.00099900	0.00099900	0.07949137	smaller => higher attraction
B	S	2970	median_log_distance	1.53013540	3.89127939	0.01065043	3.86968670	3.91193569	0.00099900	0.00099900	0.09431227	smaller => higher attraction
T	B	346	median_log_distance	1.41143012	3.34910116	0.02594853	3.29670706	3.40095878	0.00099900	0.00099900	0.14403902	smaller => higher attraction
T	S	346	median_log_distance	2.71557825	3.89123964	0.02722734	3.83958732	3.94678516	0.00099900	0.00099900	0.30861480	smaller => higher attraction
S	C	605	median_log_distance	2.73248434	3.76480592	0.02113499	3.72149250	3.80551445	0.00099900	0.00099900	0.35617910	smaller => higher attraction
C	S	874	median_log_distance	2.89684459	3.89116709	0.01826606	3.85586486	3.92828554	0.00099900	0.00099900	0.36997402	smaller => higher attraction
C	B	874	median_log_distance	2.50190949	3.35060373	0.01714753	3.31667571	3.38258808	0.00099900	0.00099900	0.42797340	smaller => higher attraction
S	T	605	median_log_distance	3.24443103	4.08377748	0.02125110	4.04000557	4.12595202	0.00099900	0.00099900	0.43199276	smaller => higher attraction
B	T	2970	median_log_distance	3.40119738	4.08227808	0.01165806	4.05966847	4.10514268	0.00099900	0.00099900	0.50606979	smaller => higher attraction
B	C	2970	median_log_distance	3.34030532	3.76563682	0.01015998	3.74599423	3.78653596	0.00099900	0.00099900	0.65355310	smaller => higher attraction
T	C	346	median_log_distance	3.38821048	3.76581895	0.02794426	3.71274817	3.81916992	0.00099900	0.00099900	0.68549884	smaller => higher attraction
C	T	874	median_log_distance	3.91282237	4.08278325	0.01914638	4.04415168	4.11926132	0.00099900	0.00099900	0.84369782	smaller => higher attraction
Winner fraction test
focal	target	n_rows	stat	observed	perm_mean	perm_sd	p_perm	q_perm	expl
S	B	605	winner_fraction	0.88925620	0.33367529	0.01911387	0.00009999	0.00029997	significantly attracted
T	B	346	winner_fraction	0.72543353	0.33291734	0.02537609	0.00009999	0.00029997	significantly attracted
B	S	2970	winner_fraction	0.64377104	0.33333721	0.00869492	0.00009999	0.00029997	significantly attracted
C	B	874	winner_fraction	0.58695652	0.33330881	0.01615995	0.00009999	0.00029997	significantly attracted
C	S	874	winner_fraction	0.30091533	0.33343833	0.01591138	0.97700230	1.00000000
B	T	2970	winner_fraction	0.22323232	0.33322732	0.00858161	1.00000000	1.00000000
T	S	346	winner_fraction	0.17341040	0.33296792	0.02557275	1.00000000	1.00000000
B	C	2970	winner_fraction	0.13299663	0.33331535	0.00875578	1.00000000	1.00000000
C	T	874	winner_fraction	0.11212815	0.33329291	0.01598989	1.00000000	1.00000000
T	C	346	winner_fraction	0.10115607	0.33343035	0.02531253	1.00000000	1.00000000
S	C	605	winner_fraction	0.07272727	0.33308917	0.01886734	1.00000000	1.00000000
S	T	605	winner_fraction	0.03801653	0.33347380	0.01903665	1.00000000	1.00000000
focal	target	n_rows	stat	observed	csr_mean	csr_sd	csr_q025	csr_q975	p_csr	q_csr	ratio_obs_to_csr	expl
S	B	605	winner_fraction	0.88925620	0.70798017	0.01888794	0.67107438	0.74545455	0.00099900	0.00299700	1.25604677	higher => more often closest
B	S	2970	winner_fraction	0.64377104	0.33131044	0.01030825	0.31245791	0.35151515	0.00099900	0.00299700	1.94310523	higher => more often closest
C	S	874	winner_fraction	0.30091533	0.15464989	0.01297453	0.13043478	0.17966247	0.00099900	0.00299700	1.94578438	higher => more often closest
B	T	2970	winner_fraction	0.22323232	0.18986768	0.00838636	0.17440236	0.20707912	0.00099900	0.00299700	1.17572578	higher => more often closest
T	B	346	winner_fraction	0.72543353	0.66813006	0.02547434	0.61849711	0.71676301	0.00999001	0.01998002	1.08576694	higher => more often closest
C	T	874	winner_fraction	0.11212815	0.08780320	0.00964929	0.06864989	0.10755149	0.00999001	0.01998002	1.27703935	higher => more often closest
T	S	346	winner_fraction	0.17341040	0.13608092	0.01875164	0.10115607	0.17341040	0.03496503	0.05994006	1.27431824	higher => more often closest
C	B	874	winner_fraction	0.58695652	0.75754691	0.01498079	0.72768879	0.78604119	1.00000000	1.00000000	0.77481211	higher => more often closest
B	C	2970	winner_fraction	0.13299663	0.47882189	0.01086838	0.45824074	0.49968855	1.00000000	1.00000000	0.27775805	higher => more often closest
T	C	346	winner_fraction	0.10115607	0.19578902	0.02098745	0.15606936	0.23988439	1.00000000	1.00000000	0.51665855	higher => more often closest
S	C	605	winner_fraction	0.07272727	0.20932231	0.01692769	0.17685950	0.24132231	1.00000000	1.00000000	0.34744157	higher => more often closest
S	T	605	winner_fraction	0.03801653	0.08269752	0.01154658	0.06115702	0.10578512	1.00000000	1.00000000	0.45970579	higher => more often closest

## Sheet: B_table
Methanobacterium sp. distance matrix
cell_id	BtoC	BtoS	BtoT
id_140052314882640	38.80721582	10.34408043	58.96609195
id_140052314884176	72.2941587	47.85491696	6.48217496
id_140052314885712	30.8587714	77.34641832	5.235649539
id_140052314887248	74.51845409	61.2780548	4.472135955
id_140052314888784	86.00581376	54.7813837	4.636809248
id_140052314890320	103.1649165	64.52906322	4.242640687
id_140052314891856	63.48228099	90.36038955	6
id_140052314893392	62.5299928	36.5650106	17
id_140052314894928	28.08445435	66.70525764	4.274065413
id_140052314896464	78.93034904	108.6738239	2.449489743
id_140052314898000	70.29931131	67.64167375	7.184021149
id_140052314915984	19.5192213	79.56129712	8.544003745
id_140052314917584	89.07300377	62.72160712	2.915475947
id_140052314919056	68.35447171	75.13718987	10.10114709
id_140052314920592	67.0133762	60.54142484	3
id_140052314922128	88.44207144	59.16924877	3.082207001
id_140052314923664	64.91532947	34.7706773	35.34119409
id_140052314925200	72.61518387	56.66388291	5.065464831
id_140052314926736	54.28697928	19	82.96828808
id_140052314928272	33.2565783	6.363961031	27.80287755
id_140052314929808	38.37492791	3.05208351	10.2741844
id_140052315013328	87.83507272	60.44832504	3.674234614
id_140052315014864	16.36289741	83.12995918	4.171673609
id_140052315016400	71.58212067	78.16009212	4.242640687
id_140052315017936	49.77951386	62.57795139	22.71563338
id_140052315019472	77	65.77233461	4.472135955
id_140052315021008	65.76473219	110.3313192	2.236067977
id_140052315022544	68.36665854	14.14213562	21.92031022
id_140052315024144	40.86563348	108.9311709	3.741657387
id_140052315025616	59.9666574	33.37663854	8.94427191
id_140052315027152	11.04536102	85.85452813	2.915475947
id_140052315028688	91.35644476	49.27981331	2.915475947
id_140052315046672	47.74934555	108.4711943	2.236067977
id_140052315048208	3.535533906	2.828427125	44.01136217
id_140052315049744	21.67948339	3.082207001	39.67366885
id_140052315051344	96.46242792	96.7729301	3.605551275
id_140052315052816	43.74357096	88.89038193	2.915475947
id_140052315054352	25.66695045	55.195481	3
id_140052315055888	53.01886457	24.85960579	15.3785565
id_140052315057424	56.66568627	36.48287269	17.20465053
id_140052315058960	88.38551918	85.28774824	3.605551275
id_140052315060496	71.49413185	38.419134	2.828427125
id_140052315062032	100.5382164	84.48661171	3.355858756
id_140052315080016	78.3070878	82.46817568	11.22497216
id_140052315081552	67.00746227	61.2780548	3
id_140052315083088	67.32755751	76.63550091	7.810249676
id_140052315084624	80.51707893	38.37968212	4.582575695
id_140052315086160	67.14908786	70.09279564	6.350852961
id_140052315087696	39.47150871	30.24896692	7.483314774
id_140052315089232	11.04536102	15.93737745	13.27905619
id_140052315090768	69.14477565	50.88221693	3.605551275
id_140052315092304	21.42428529	13.07669683	10.67707825
id_140052315093840	96.48315915	77.47257579	3.741657387
id_140052315177360	72.35909355	66.9902541	3.687809964
id_140052315178896	95.21872183	99.42206956	5.196152423
id_140052315180432	104.2234619	95.3444214	4
id_140052315181968	19.24472838	15.33492003	3.207272869
id_140052315183504	85.18802733	73.77669009	7.810249676
id_140052315185040	98.06375477	85.0940656	6.964194139
id_140052315186576	24.5456506	86.26564131	3.769491371
id_140052315188112	85.53946458	82.01219422	4.123105626
id_140052315189648	3.34511977	2.28126023	24.74930249
id_140052315191184	36.24913792	25.3179778	33.49626845
id_140052315192720	11.70469991	21.21320344	2
id_140052315210704	74.67261881	105.1522705	4.472135955
id_140052315212240	65.48854101	121.9227008	2.230104504
id_140052315213776	106.780148	91.02197537	5.830951895
id_140052315215312	92.17374897	40.26164428	21
id_140052315216848	88.36811324	84.72317806	2.85040919
id_140052315218384	94.21783271	114.7867588	2
id_140052315219920	87.66413178	89.47066558	11.91637529
id_140052315221456	107.8718978	97.3794197	3.153365582
id_140052315222992	62.77490137	58.39514849	5.024183795
id_140052315224528	61.20049019	22.09072203	37.80211634
id_140052315226064	55.33534133	62.08059278	2
id_140052315260432	91.15371633	87.80660567	6.123724357
id_140052315261968	46.5188134	105.4229577	2
id_140052315263504	100.4689007	94.37690395	8.124038405
id_140052315265040	70.75309181	115.4339638	2.121320344
id_140052315266576	86.86195945	44.14748011	25.3179778
id_140052315268112	101.1385189	96.15612305	8.717797887
id_140052315269648	104.9295878	108.8152386	2.835444011
id_140052315271184	86.79285685	78.46018098	8.94427191
id_140052315272720	98.29547294	81.44323176	6.164414003
id_140052315274256	97.39096467	95.47250913	26.03843313
id_140052315308624	78.52388172	48.76474136	26.32489316
id_140052315310160	86.33365508	64.77653896	3.674234614
id_140052315311696	47.86439178	20.1246118	89.92218859
id_140052315313232	110.6752005	96.86072475	6.964194139
id_140052315314768	62.90553803	71.22883669	11.4412273
id_140052315316304	58.00862005	96.52978815	4.123105626
id_140052315317840	91.95581818	91.75575651	5.45169892
id_140052315319376	60.35087168	27.30632401	63.77284118
id_140052315320912	41.88078318	47.54997371	6.363961031
id_140052315322448	123.0406437	111.8615215	8.031189202
id_140052315323984	76.03970135	76.02625671	9.961678213
id_140052315374736	93.61142599	128.7039621	4.368295733
id_140052315376336	120.8842421	107.2660244	8.774964387
id_140052315377808	42.52396972	98.22545539	15.26585939
id_140052315379344	28.65309756	18.02775638	15.28070679
id_140052315380880	17.69180601	42.94182111	7.874007874
id_140052315382416	85.56868586	134.9703671	5
id_140052315383952	125.9761882	118.2962383	3.535533906
id_140052315385488	62.96824597	72.13875519	4.123105626
id_140052315387024	15.74801575	46.71188286	12.02081528
id_140052315388560	91.83136719	141.2126057	2
id_140052315422928	87.66413178	95.0210503	2.236067977
id_140052315424464	116.7989726	115.0478161	7.141428429
id_140052315426000	75.10659092	72.59476565	4
id_140052315427536	115.8101895	117	12.98075499
id_140052315429072	38.54867053	97.29850975	3.16227766
id_140052315430608	131.6130693	121.1981848	16.0623784
id_140052315432144	44.55333882	105.4229577	7.280109889
id_140052315433680	120.1425508	114.1443265	5.022004022
id_140052315435216	50.3189825	97.33447488	3.535533906
id_140052315436752	103.6243215	127.5852656	3.741657387
id_140052315438288	76.99350622	117.1750827	4.898979486
id_140052315456272	67.94850992	98.5139584	7.071067812
id_140052315457808	66.12626128	116.8411961	4.077650536
id_140052315459344	30	59.40538696	10.72380529
id_140052315460880	122.4826518	120.4408569	4.898979486
id_140052315462416	43.24349662	67.74215822	13.47219359
id_140052315463952	79.51100553	92.87626177	4
id_140052315465488	69.94998213	107.1727577	3.535533906
id_140052315467024	50.65249231	84.32298691	4.352092738
id_140052315468560	83.74365648	77.94228634	11.70469991
id_140052315471120	37.80211634	44.3339599	4.472135955
id_140052315471632	77.85884664	102.6547612	15.13274595
id_140052315506000	18.89444363	58.94913061	3
id_140052315507536	53.48073191	92.13859775	8.01949165
id_140052315509072	65.56675987	125.938477	4.062019202
id_140052315510608	103.5535984	123.5113602	7.3992812
id_140052315512144	119.4005863	111.2834219	2
id_140052315513680	47.4341649	68.27884006	2.828427125
id_140052315515216	97.59098319	139.2713179	7.280109889
id_140052315516752	62.39390996	87.50142856	2.828427125
id_140052315518288	90.16651263	127.3027887	5.656854249
id_140052315519824	61.36774397	48.3011387	4.123105626
id_140052315570576	56.35601121	82.37718131	9.899494937
id_140052315572112	82.58179186	121.2943694	4.180044334
id_140052315573648	16.97056275	35.17101079	34.13209633
id_140052315575184	62.034285	85.14129009	4
id_140052315576720	140.404772	124.9359836	9.273618495
id_140052315578256	30.69686991	101.2105752	2.968189426
id_140052315579792	124.7838131	141.450816	8.602325267
id_140052315581328	105.4074604	135.5245162	5.091179049
id_140052315582864	45.67274899	74.24621202	6.08276253
id_140052315584400	80.75270893	136.0624856	5.744562647
id_140052315585936	22.02271555	62.39390996	16.61324773
id_140052315636688	89.56003573	113.2475165	2.449489743
id_140052315638224	72.45688373	113.507709	12.18605761
id_140052315639760	75.11990415	131.5978723	6.442049363
id_140052315641296	102.6693723	100.4290795	7.348469228
id_140052315642832	69.12925991	126.4679406	3.945656108
id_140052315644368	20.34698995	80.28075735	4.041451884
id_140052315645904	89.96666049	106.2355873	10.60660172
id_140052315647440	117.2476013	109.8817546	8.062257748
id_140052315648976	100.9158065	141.9330828	5.916079783
id_140052315650512	133.4503653	152.4139101	13.92838828
id_140052315652048	28.28427125	65.31462317	6.403124237
id_140052315670032	75.34833971	96.04665465	12.3926128
id_140052315671568	80.43631021	115.6287162	6.363961031
id_140052315673104	87.84645696	120.3183278	12
id_140052315674640	79.07907435	113.7717012	5
id_140052315676176	125.23977	162.0061727	17.49285568
id_140052315677776	119.0546093	143.8940583	12.72792206
id_140052315679248	78.23974532	125.0352116	5.016033559
id_140052315680784	48	95.35722311	10.22252415
id_140052315682320	49.55804677	82.24354078	8
id_140052315683856	72.45688373	94.58329662	8.602325267
id_140052315734608	93.9787088	144.5327539	10.23522518
id_140052315736144	61.54179985	89.41201634	4.740927969
id_140052315737680	98.55455342	128.7672319	9.486832981
id_140052315739216	108.3247002	125.0335346	2.771175378
id_140052315740752	75.73875566	106.2195096	4.95458441
id_140052315742288	127.694949	168.635702	14.17744688
id_140052315743824	17.02938637	67.60177512	19.31320792
id_140052315745360	13.43502884	66.9925369	22.82542442
id_140052315746896	55.04543578	88.09653796	5.385164807
id_140052315748432	101.6562836	141.3718501	16.15549442
id_140052315749968	9.433981132	55.6596802	41.82702476
id_140052315784336	38.22302971	81.70067319	2.828427125
id_140052315785872	78.38841541	141.1636225	9.192388155
id_140052315787472	50.20956084	76.0821924	5.744562647
id_140052315788944	26	82.88546314	20.02498439
id_140052315790480	29.63406559	90.64656551	6.954524803
id_140052315792016	81.81075724	122.7110427	12.02081528
id_140052315793552	78.52388172	116.0344776	20.46948949
id_140052315795088	33.13608305	66.85057965	25.94224354
id_140052315796624	51.48786265	106.2449999	3
id_140052315798160	69.67065379	133.0263132	4.041451884
id_140052315816144	69.84268036	106.4236816	17.32050808
id_140052315817680	99.2068546	156.9299207	20.92844954
id_140052315819216	62.20128616	138.2208378	12.9614814
id_140052315820752	86.33655078	142.9178085	23.08679276
id_140052315822288	48.67237409	94.81033699	11
id_140052315823824	37.13488926	113.0707743	20.04993766
id_140052315825360	36.81032464	118.9075271	18
id_140052315948368	45.65084884	34.7706773	6.363961031
id_140052315949904	86.0319708	30.49590136	19.5064092
id_140052315951440	74.67261881	34.53983208	4.582575695
id_140052315952976	119.6076921	16.97056275	4.472135955
id_140052315954512	25.16537283	2.870319797	4.222574451
id_140052315956048	34.98571137	2.236067977	20.80865205
id_140052315957584	54.59853478	41.58124577	11.87434209
id_140052315959120	40.23679908	23.04343724	31.01612484
id_140052315960656	53.57545621	2.870793981	29.4487518
id_140052315962192	107.0898521	33.14400348	4.065325973
id_140052315996560	7.071067812	4.358898944	49.88987873
id_140052315998096	2	2.886751346	85.72047597
id_140052315999632	21.56385865	2.236067977	60.67124525
id_140052316001168	69.49100661	25.17935662	8
id_140052316002704	87.88443328	3.535533906	5.772580638
id_140052316004240	5.017392683	4.129792067	45.87061757
id_140052316005776	18.38858268	1.008413957	5.896904916
id_140052316007312	32.40316464	0	14.64438965
id_140052316008848	47.09564736	5.773502692	10.63014581
id_140052316010384	52.89612462	20.49390153	48.12483766
id_140052316011920	93.34880824	51.98076567	12.52996409
id_140052316046288	26.2488095	3	23.74868417
id_140052316047824	59.95487657	2.244424836	7.515655096
id_140052316049360	38.92300091	4.527692569	16.76305461
id_140052316050896	73.00551217	50.05616	3.442357606
id_140052316052432	68.23855215	24.45403852	6.164414003
id_140052316053968	33.81952443	38.57780001	27.46777912
id_140052316055504	43.66921112	40.55859958	6.708203932
id_140052316057040	46.26920778	0	25.69055847
id_140052316058576	62.96824597	22.36067977	3
id_140052316060112	47.59114008	57.50737003	2.867229488
id_140052316061648	71.44928271	28.28427125	5.431390246
id_140052316096016	32.15587038	5.830951895	46.9893605
id_140052316097552	63.94528911	33.54101966	9.246621004
id_140052316099088	34	43	14.98332406
id_140052316100624	8.051523875	1.744204561	68.0652448
id_140052316102160	45.04442252	7.615773106	62.63385666
id_140052316103760	96.40539404	61.79805822	4.242640687
id_140052316105232	50.88221693	4.062019202	16.40121947
id_140052316106768	19	2	26.0959767
id_140052316108304	93.13431162	9.246621004	7.141428429
id_140052316109840	23.0180272	21.86327026	50.49601925
id_140052316144208	19.84943324	49.52776999	36.51027253
id_140052316145744	32.63433774	7.211102551	57.38466694
id_140052316147280	65.94694838	34.64823228	5.656854249
id_140052316148816	90.95666271	37.34514713	3.110117749
id_140052316150352	25.98076211	3.16227766	13.15294644
id_140052316151888	25.51470164	3.535533906	22.22611077
id_140052316153424	32.29674116	2.616258456	16.37432823
id_140052316154960	8.612233531	49.99310747	31.34730723
id_140052316156496	31.0585926	21.46044302	59.66611052
id_140052316158032	21.11871208	7.778174593	62.01612693
id_140052316159568	73.68174808	52.09606511	7.280109889
id_140052316193936	46.57252409	16.34013464	41.33400537
id_140052316195536	33.85262176	7.615773106	49.26459175
id_140052316197008	33.18132005	6.350852961	58.15496539
id_140052316198544	48.33218389	57.35416288	20.03746491
id_140052316200080	18.59317812	1.791875317	36.04574837
id_140052316201616	88.34591105	62.71363488	3
id_140052316203152	25.78759392	52.5832673	8.485281374
id_140052316204688	49.989999	10.04987562	30
id_140052316206224	4.123105626	11.48912529	47.60252094
id_140052316207760	44.06812907	28.58321186	21.92031022
id_140052316225744	27.80877731	4.527361247	20.54063069
id_140052316227280	85.08818954	76.85050423	5.196152423
id_140052316228816	25.07987241	46.54030511	6.363961031
id_140052316230352	20.80865205	4.242640687	5.656854249
id_140052316231888	29.08321409	4.371241793	21.98466749
id_140052316233424	87.73254812	35.41186242	6.708203932
id_140052316234960	56.66568627	31.40063694	5.656854249
id_140052316236560	47.9998616	29.08383039	5.908456493
id_140052316238032	50.40833264	22.81446909	2.828427125
id_140052316239568	35.46359896	32.82433442	5.631003598
id_140052316241104	7.03562364	5.385164807	69.8641539
id_140052316291856	82.09031811	64.24247396	3.059412043
id_140052316293392	55.1369905	13.73702389	4.108269461
id_140052316294928	89.61026727	27.03701167	10.02496883
id_140052316296528	66.04595589	49.81700508	2.494873794
id_140052316298000	37.33630941	32.66496594	88.35157044
id_140052316299536	30.08321791	16.30950643	3.535533906
id_140052316301072	75.53806987	33.7194306	3
id_140052316302608	29.14618328	64.35060217	3
id_140052316304144	20.83266666	16.01561738	49.80963762
id_140052316305680	80.58535847	51.04899607	3.31662479
id_140052316307216	23.87467277	4.123105626	7.483314774
id_140052316357968	76.1642961	8.246211251	1
id_140052316359504	20.02498439	58.72818744	9.814954576
id_140052316361040	74.7760044	28.23783113	5.065010883
id_140052316362576	40.03378226	14.728797	24.24257565
id_140052316364112	66.6708332	18.45264209	11.04536102
id_140052316365648	75.13321503	28.70540019	3.31662479
id_140052316367184	44.89988864	33.24154028	3.464101615
id_140052316368720	43.57312479	30.43215366	64.88038011
id_140052316370256	8.245930228	32.52691193	3.456729578
id_140052316371792	22.6715681	46.00543446	9.433981132
id_140052316406160	32.38054972	1	48.7903679
id_140052316407696	90.03332716	59.21148537	5
id_140052316409232	78.23681998	22.38302929	3.674234614
id_140052316410768	12.36931688	4.618802154	39.56008089
id_140052316412304	81.95730596	49.58830507	6.32455532
id_140052316413840	19.33907961	64.84597135	11.5758369
id_140052316415440	53.61902647	39.2173431	13.37908816
id_140052316416912	62.08059278	38.07886553	3.31662479
id_140052316418448	34.94281042	30.82207001	61.95159401
id_140052316419984	35.50129086	7.064237144	9.853291338
id_140052316421520	37.50446259	55.25081869	97.15871608
id_140052316472272	9.643650761	9.695359715	61.62791575
id_140052316473808	6.708203932	1.414213562	53.16954015
id_140052316475344	38.00195367	25.48083763	27.04873141
id_140052316476880	31.36251328	49.93829571	3.532048613
id_140052316478416	16.673332	66.03786792	6.670832032
id_140052316479952	3.741657387	18.01388353	4.062019202
id_140052316481488	97.73457871	33.83973965	27.02853808
id_140052316483024	64.28841264	13.45362405	4.949747468
id_140052316484560	12.66885946	4.123105626	90.64766958
id_140052316486096	9.16515139	14.43375673	21.01190139
id_140052316487632	25.8069758	0.707106781	45.61797891
id_140052316522000	78.01795349	82.51646943	5.625300387
id_140052316523536	21.11871208	73.46427703	6.782329983
id_140052316525072	4.472135955	51.73973328	6.708203932
id_140052316526608	19.23538406	1	45.04442252
id_140052316528144	65.59648272	86.16658493	2.28016878
id_140052316529744	87.47571091	32.07802986	6.670832032
id_140052316531216	69.60603422	41.41255848	7.810249676
id_140052316532752	67.42403132	36.3868108	7.211102551
id_140052316534288	23.72254306	5.277959635	10.91620588
id_140052316535824	53.68762567	24.98953417	3.464101615
id_140052316553808	49.49747468	3.535533906	14.14213562
id_140052316555344	64.78425735	21.84032967	24
id_140052316556880	29.5834523	16.95825532	7.83021071
id_140052316558416	16.52271164	3	10.02496883
id_140052316559952	17.74823935	33.04542328	14.89966443
id_140052316561488	76.1642961	76.64202503	2.121320344
id_140052316563024	77.27224599	77.67882594	5.049752469
id_140052316564560	35.11409973	42.95346319	11.70469991
id_140052316566096	77.36924454	43.32435804	9.899494937
id_140052316567632	30.47950131	25.98076211	56.32051136
id_140052316569168	12.08304597	11.18033989	52.5642464
id_140052316603536	69.74955197	26.32489316	2.886751346
id_140052316605072	7.778174593	48.92851929	12.20655562
id_140052316606672	34.92849839	68.02940541	2.828427125
id_140052316608144	62.54970905	43.5567754	3.535533906
id_140052316609680	24.68915056	54.47435138	41.79344255
id_140052316611216	65.05404333	4.009725475	22.87105061
id_140052316612752	27.43649373	26.47926408	19.23601763
id_140052316614288	30.7408523	47.93745926	10.24695077
id_140052316615824	28.63564213	63.70243323	4.062019202
id_140052316617360	7.130053879	8.485281374	17.87462775
id_140052316651728	35.44009029	30.66757245	51.26402247
id_140052316653264	37	42.96510212	16.97056275
id_140052316654800	71.82597504	61.20283849	3.635712437
id_140052316656336	49.10193479	52	2.449489743
id_140052316657872	28.17800561	1.224744871	69.43342135
id_140052316659408	77.54998388	101.3212712	9.246621004
id_140052316660944	37.96050579	93.05912099	3.535533906
id_140052316662544	28.22429999	56.45599383	2.835435426
id_140052316664016	19.00021259	48.19378038	3.259327596
id_140052316665552	41.41255848	43.8178046	4.062019202
id_140052316667088	9.407443861	2.121320344	36.19392214
id_140052316701456	32.52691193	85.42833254	5.744562647
id_140052316702992	41.12177039	66.55824517	117.2028157
id_140052316704528	61.0832906	19.85510922	5.37392454
id_140052316706064	74.33034374	2	14.31782106
id_140052316707600	54.07102858	40.46338175	68.39134755
id_140052316709136	68.97825744	4.949747468	17.70593121
id_140052316710672	38.8097625	5.536325958	39.95636411
id_140052316712208	28.65778514	2.886751346	32.53316329
id_140052316713744	63.57632546	56.72929936	19.38198463
id_140052316716304	7.549834435	61.46543744	20.0124961
id_140052316716816	33.98529094	46.14108798	68.62943975
id_140052316767568	18.59876266	2.038687486	15.22592036
id_140052316769104	8.544003745	13	12.72792206
id_140052316770640	54.63515352	70.85901495	6.32455532
id_140052316772176	28.46049894	52.0096145	4.582575695
id_140052316773712	76.23507707	62.6522349	9.227364454
id_140052316775248	82.82511696	64.45153218	13.49073756
id_140052316776784	39.34463115	44.92215489	4.242640687
id_140052316778320	43.92038251	32.83291032	21.86321111
id_140052316779856	6.557438524	70.85901495	11.40175425
id_140052316781392	43.15089802	15.65247584	66.09084657
id_140052316832144	23.31507914	2.450437371	51.36432204
id_140052316833680	33.2565783	43.0464865	19.62141687
id_140052316835216	52.34500931	28.29016319	25.98076211
id_140052316836752	64.41273166	86.56211643	7.071067812
id_140052316838288	55.31452495	36.54188069	1.739477395
id_140052316839824	35.14112308	31.50573172	13.56694403
id_140052316841424	65.49045732	46.66904756	16.18641406
id_140052316842896	73.5394253	43.56959904	10.47456538
id_140052316844432	69.4046108	72.15261603	3.605551275
id_140052316845968	37.50333319	52.49761899	77.02596965
id_140052316847504	47.54997371	105.1189802	2.915475947
id_140052316881872	82.07923002	52.54521862	2.828427125
id_140052316883408	70.20683727	116.2669343	6.670832032
id_140052316884944	98.59538784	82.45234282	6.395868163
id_140052316886480	19.4422221	81.44937078	9.110433579
id_140052316888016	36.06937759	39.97499218	32.32645975
id_140052316889552	7.141428429	42.24926035	7.348469228
id_140052316891088	16.15549442	7.810249676	27.76688675
id_140052316892624	96.93296653	94.3716059	3.741657387
id_140052316894160	69.6491206	29	12.02081528
id_140052316895696	66.00690625	78.33596978	8.722169801
id_140052316897232	104.3218174	71.26597649	3.117035262
id_140052316931600	27.16615541	2.915475947	8.485281374
id_140052316933136	26.17250466	11.1579568	87.37276464
id_140052316934672	27.62245463	83.58229478	6.164414003
id_140052316936208	77.78174593	71.56116265	5.431390246
id_140052316937744	68.7095007	81.33941546	3.729934643
id_140052316939280	51.09794516	26.0959767	42
id_140052316940816	25.3179778	89.2972564	5.431390246
id_140052316942352	48.29205131	72.62687471	2.838365276
id_140052316943888	59.01694672	45.39823785	46.35191474
id_140052316945424	19.92485885	4.062019202	74.08778577
id_140052317013136	31.37674298	37.68288736	9.486832981
id_140052317014736	31.144823	7.842193571	76.21023553
id_140052317016208	12.32882801	3.535533906	7.03562364
id_140052317017744	34.66987165	5.744562647	26.47640459
id_140052317019280	51.97114584	34.06366588	3
id_140052317020816	27.15504364	0.101117127	66.87977156
id_140052317022352	15.68438714	2	16.09347694
id_140052317023888	52.10566188	3.464101615	10.29563014
id_140052317025424	9.899494937	13.34166406	29.96664813
id_140052317026960	35.53599238	46.6193946	54.10866172
id_140052317077712	13	3.535533906	63.45076832
id_140052317079248	74.73285757	52.5642464	2.236067977
id_140052317080784	34.3220046	1.154700538	36.63331817
id_140052317082320	30.36001234	2.630360171	30.08215484
id_140052317083856	61.55485359	2.236067977	10.67707825
id_140052317085392	63.48228099	8.366600265	8.336666
id_140052317086928	49.92995093	2.236067977	25.79728668
id_140052317088528	13.90140313	42.66228558	3.535533906
id_140052317090000	54.82224455	5.386663852	8.780578128
id_140052317091536	31.06444913	63.79655163	11.02270384
id_140052317093072	42.96510212	41.20679556	5.338539126
id_140052317127440	36.79673899	0.707106781	21.3541565
id_140052317128976	46.54030511	6.403124237	21
id_140052317130512	30.87069808	14.31782106	8.124038405
id_140052317132048	37.59454675	1.966956471	6.074224847
id_140052317133584	52.52207358	0.865244247	30.77832723
id_140052317135120	25.3179778	2.121320344	81.71291208
id_140052317136656	18.81488772	2	13.15294644
id_140052317138192	22.7293601	1.086913511	7.460845832
id_140052317139728	47.21313091	1.723183489	4.497681403
id_140052317142288	29.02100011	23.02624435	4.067431757
id_140052317142800	24.20658631	1.026196322	38.00445884
id_140052317160784	15.08705549	0	28.32250011
id_140052317162320	31.99644635	9.707722281	3.464101615
id_140052317163856	48.34252786	2.449489743	9.695359715
id_140052317165392	26.43860813	17.72004515	23.6748812
id_140052317166928	49.11475955	0.615030366	11.98780177
id_140052317168464	32.80055582	8.083605508	13.46460619
id_140052317170000	42.06542523	14.69693846	30.757113
id_140052317171536	14.86606875	3.605551275	9.669539803
id_140052317173072	18	75.66042559	3.464101615
id_140052317174608	67.70496137	0	35.37630042
id_140052317258128	62.65870665	7.032686819	25.51421875
id_140052317259664	4.69041576	3.674234614	52.71622141
id_140052317261200	47.69696007	3.674234614	18.70828693
id_140052317262736	67.12674579	2.886751346	17.56416807
id_140052317264272	43.56604182	4.358898944	19.74841766
id_140052317265808	6.363961031	3.464101615	64.44377394
id_140052317267408	67.33498348	2.121320344	25.19920634
id_140052317268880	68.10286338	2.121320344	22.72663635
id_140052317270416	25.61249695	31.78049716	5.744562647
id_140052317271952	61.40032573	1.414213562	13.37908816
id_140052317273488	59.46427499	1	29.69848481
id_140052317291472	71.56116265	1.224744871	18.02775638
id_140052317293008	65.91661399	2	14.14213562
id_140052317294544	74.37069315	8.306623863	15.13274595
id_140052317296080	9.389124449	4.777378767	98.57217776
id_140052317297616	33.17779472	1.289499656	49.22259176
id_140052317299152	24.989998	13.15294644	17.60681686
id_140052317300688	51.0881591	84.24369413	58.36094585
id_140052317302224	9.486832981	15.26433752	15.5241747
id_140052317303760	28.8444102	3	49.32544982
id_140052317305296	32.44621803	3.172394292	47.37889071
id_140052317306832	72.92461861	0	22.20360331
id_140052317341200	51.41089681	46.71608627	4.245395374
id_140052317342736	29.46183973	6.633249581	48.08326112
id_140052317344272	49.60846702	4.358898944	15
id_140052317345808	20.32240143	2	26.6364412
id_140052317347344	48.83646179	2.121320344	8.660254038
id_140052317348944	22.64950331	20.54263858	5
id_140052317350416	36.19043387	8.200206019	20.94707743
id_140052317351952	46.04345773	58.78775383	2.828427125
id_140052317353488	28.27014219	4.949747468	5.444999292
id_140052317355024	45.13313639	58.52349955	4
id_140052317389392	60.51446108	2	41.58124577
id_140052317390928	69.41901757	2.449489743	29.69848481
id_140052317392464	3.64074959	5.069011521	26.44246822
id_140052317394000	50.76416059	52.97169055	5.656854249
id_140052317395536	73.36354367	17.68683023	8.725631005
id_140052317397072	46	21.9544984	13.45362405
id_140052317398608	4.472135955	10.39230485	64.42049363
id_140052317400144	31.99972932	3.153658029	10.12160428
id_140052317401680	61.40901924	2	29.96056719
id_140052317403216	58.19793811	4.69041576	7.03562364
id_140052317404752	32.44827737	13.09873561	15.53292699
id_140052317439120	82.65740371	3.398765686	9.608084678
id_140052317440720	28.7923601	6	17.21917536
id_140052317442192	40.84073608	54.08291901	38.16459563
id_140052317443728	24.99106045	5.354829623	20.52611336
id_140052317445264	35.62302626	2.236067977	55.03635162
id_140052317446800	41.54515616	63.82005954	2.828427125
id_140052317448336	32.70171392	16.87746042	32.76318177
id_140052317449872	80.81955214	2	22.63300283
id_140052317451408	43.15089802	3.535533906	3.16227766
id_140052317452944	25.56465719	14.38945083	5.037408022
id_140052317470928	30.78960864	3.464101615	43.32435804
id_140052317472464	31.1608729	5.744562647	3.605551275
id_140052317474000	48.12483766	14.86606875	20.02498439
id_140052317475536	5.230186886	2.829791794	21.80786815
id_140052317477072	15.58845727	9.433981132	41.34005322
id_140052317478608	35.39774004	3.16227766	47.58150901
id_140052317480144	21.84032967	2.449489743	64.75337829
id_140052317481744	75.13986958	18.12456896	4.242640687
id_140052317483216	38.77174953	3.807975878	4.297061991
id_140052317484752	33.98529094	5.196152423	14.14213562
id_140052317486288	29.02813648	21.90456902	2.974382234
id_140052317537040	80.9993811	10.98372492	19.09188309
id_140052317538576	44.11973108	2.995110098	9.864657915
id_140052317540112	50.56666467	2.415566793	7.505553499
id_140052317541712	32.75667871	15	28.91366459
id_140052317543184	37.90778284	18.68154169	40.41658076
id_140052317544720	48.25480755	5.401795196	8.867518355
id_140052317546256	13	3.16227766	78.36453279
id_140052317547792	42.46174749	2	46.70117772
id_140052317549328	17.72004515	2.828427125	18.92088793
id_140052317550864	32.34192326	24.75883681	3
id_140052317552400	68.13925748	3.709778825	27.24699682
id_140052317570384	47.29693436	32.68026928	12.9614814
id_140052317571920	13.10185238	29.98007429	3
id_140052317573456	25.03996805	19.07878403	5.385164807
id_140052317574992	85.81375181	23.02172887	6.164414003
id_140052317576528	39.29376541	1.414213562	40.44749683
id_140052317578064	40.07492982	2.828427125	45.82575695
id_140052317579600	20.61552813	3.535533906	29.18903904
id_140052317581136	55.71355311	55.23585792	3
id_140052317582672	5.656854249	15.3622915	15.14925741
id_140052317584208	11.78982612	2.309401077	84.69356528
id_140052317667728	40.42595392	2.15131613	25.01473855
id_140052317669264	5.385164807	50.33885179	48.22862221
id_140052317670800	42.76680956	8.94427191	6.670832032
id_140052317672336	74.57096898	0	34.90044874
id_140052317673872	7.071067812	2.828427125	14.14213562
id_140052317675408	48.88762625	68.14690015	6.403124237
id_140052317676944	10.22252415	2.236067977	66.05300902
id_140052317678480	40.79458489	22.14794662	41.43248229
id_140052317680016	85.48684109	51.4392846	7
id_140052317681552	74.79304781	49.96999099	2.828427125
id_140052317683088	75.80237463	1.732050808	16.03121954
id_140052317717456	32.17141588	28.17800561	4.242640687
id_140052317718992	29.46631192	2.445528966	52.65433236
id_140052317720528	5.830951895	2.915475947	38.75564475
id_140052317722064	74.33707016	44.77722635	3.464101615
id_140052317723600	12.72792206	3.464101615	74.57211275
id_140052317725136	47.37087713	3.464101615	9.899494937
id_140052317726672	48.51657928	4.309104134	20.21888543
id_140052317728208	51.61879503	2.828427125	11.33578405
id_140052317729744	23.86518339	4.058317644	7.41596197
id_140052317731280	29.636301	2.251638263	54.19070044
id_140052317732816	42.68297791	78.93257405	2.323308917
id_140052317750800	53.16013544	3.464101615	45.39823785
id_140052317752336	16.49730093	2.240578754	45.07097152
id_140052317753872	6.368760613	29.46637273	77.26034205
id_140052317755408	3.16227766	3.464101615	53.03772242
id_140052317756944	69.72501525	2.309401077	33.38514313
id_140052317758480	60.1781044	0	73.59907235
id_140052317760016	74.24957912	4.123105626	11.04536102
id_140052317761552	11.53256259	7.141428429	62.96824597
id_140052317763088	54.87257967	1.414213562	2.121320344
id_140052317764624	26.79492433	2.968937331	6.350852961
id_140052317815376	71.61703708	12.72792206	9.643650761
id_140052317816912	27.03106852	8.37015574	38.17467893
id_140052317818448	31.96873473	59.71599451	13.19090596
id_140052317819984	30.43024811	2.828427125	55.5967625
id_140052317821520	52.92466812	0	63.61451062
id_140052317823056	14.25000384	2.463987827	9.310427246
id_140052317824592	54.5068803	11.22497216	3
id_140052317826128	37.48418552	22.30420271	3.535533906
id_140052317827664	36.33180425	1.224744871	23.02172887
id_140052317829200	13.61245044	5.177813758	7.469723634
id_140052317830736	38.8458492	2.828427125	37.60319135
id_140052317848720	34.85456865	1.180908363	59.2189073
id_140052317850256	21.67948339	2.309401077	70.73188814
id_140052317851856	35.14256678	19.79898987	5
id_140052317853328	56.93856338	25	61.43289021
id_140052317854864	14.45683229	3.741657387	51.20058593
id_140052317856400	62.0644826	84.58132182	3.535533906
id_140052317857936	55.69560126	10.44030651	27.67670501
id_140052317859472	22.44994432	16.38596961	4.242640687
id_140052317861008	87.66413178	47.81213235	3
id_140052317862544	30.13303835	3.535533906	4.618802154
id_140052317880528	40.09987531	16.30950643	5
id_140052317882064	4.994820297	3.059585999	72.5729922
id_140052317883600	81.43293803	13.44455893	7.778174593
id_140052317885136	53.76802024	16.09347694	6.363961031
id_140052317886672	28.46049894	32.52691193	5.773502692
id_140052317888208	31.0322413	20.1246118	40.09987531
id_140052317889744	65.58963333	42.76680956	12
id_140052317891280	8.774964387	47.74934555	17.01469953
id_140052317892816	45.06885981	2.84571951	25.33887163
id_140052317894352	39.89987469	4.358898944	46.19523785
id_140052317895888	50.24561917	7.565258984	2.326078028
id_140052317946640	38.96151948	3	16.97056275
id_140052317948176	20.26811851	2.15962843	39.14811128
id_140052317949712	32.07023542	3.605551275	54.08326913
id_140052317951248	54.26466483	23.52943413	3.535533906
id_140052317952784	50.53711507	11.18033989	5.744562647
id_140052317954320	29	2.886751346	57.73502692
id_140052317955856	42.35563717	1.732050808	4.123105626
id_140052317957392	32.34873045	2.10515135	3.01297179
id_140052317958928	40.80441153	2	44.09081537
id_140052317961488	40.62019202	2	8.185352772
id_140052317962000	53.71219601	2.236067977	42.02380278
id_140052318060944	26.20281193	29.84335767	1.493296751
id_140052318062480	19.67231557	2.449489743	45.43126677
id_140052318064016	45.66180023	16.34013464	58.13776741
id_140052318065552	19.06768403	5.517470808	22.78815468
id_140052318067088	7.350418215	3.083592483	10.00031197
id_140052318068624	30.38715508	3.535533906	98.79219136
id_140052318070160	10	65.17668295	57.21013896
id_140052318071696	7.280109889	2.828427125	59.24525297
id_140052318073232	18.02775638	2.121320344	61.73329734
id_140052318074768	13.03840481	11.53256259	2.828427125
id_140052318076304	42.24183351	3.425366542	4.363168724
id_140052318110672	4.527692569	25.05992817	82.24962006
id_140052318112208	25.63201124	2.236067977	42.73172124
id_140052318113744	3.565314549	2.159440938	13.26333995
id_140052318115280	23.90018635	2.828427125	76.50099847
id_140052318116816	28.3019434	2	48.60041152
id_140052318118352	21.47091055	3	35.15679166
id_140052318119888	22.02271555	4.949747468	55.4977477
id_140052318121424	7	14.76482306	10.09950494
id_140052318122960	4	9.433981132	54.94542747
id_140052318124496	32.34192326	3.464101615	26.72077843
id_140052318126032	31.44041984	3	6.403124237
id_140052318176784	43.87482194	28.37252192	2.449489743
id_140052318178320	2.828427125	1.224744871	2.828427125
id_140052318179856	16.40121947	21.1896201	2.828427125
id_140052318181392	43.9089968	33.9411255	28.23118843
id_140052318182928	2.121320344	22	50.06995107
id_140052318184464	14.03566885	21.9089023	21
id_140052318186000	15.8113883	4.123105626	52.69724851
id_140052318187536	19.8242276	10.19803903	63.15457228
id_140052318189072	29.69848481	4.358898944	2.828427125
id_140052318190608	13.58307771	2.828427125	18.35755975
id_140052318224976	26.47640459	3	40.82891133
id_140052318226512	75.2861209	1.732050808	37.97367509
id_140052318228048	22.49444376	2.236067977	16.82260384
id_140052318229584	47.78074926	16.0623784	2.828427125
id_140052318231120	17.90251379	2	54.08326913
id_140052318232656	15.77973384	34.98571137	5.338539126
id_140052318234192	63	8.306623863	42.02380278
id_140052318235728	25.78083172	3.587770092	73.82296446
id_140052318237264	5.656854249	1.732050808	30.14962686
id_140052318238800	1.414213562	20.04993766	38.94868419
id_140052318240336	14.14217212	3.540192914	25.01594539
id_140052318274704	21.56385865	3.16227766	58.5918083
id_140052318276240	25.68435144	24.51590132	4.747472131
id_140052318277840	13.64205528	45.12583288	4.843843839
id_140052318279312	4.898979486	33.36165464	3
id_140052318280848	3.549367857	11.54700538	28.69028198
id_140052318282384	9.571957346	4.716414296	4.413161818
id_140052318283920	33.66853051	33.19279219	4.000313086
id_140052318285456	26.68332813	42.15447782	10.34408043
id_140052318286992	37.38983819	3.535533906	81.3019065
id_140052318288528	58.64106729	22.17732904	5.230954468
id_140052318322896	3	4.123105626	21.79449472
id_140052318324432	8	26.30589288	21
id_140052318325968	5.099019514	3	37.64306045
id_140052318327504	61.44156304	3.746226697	23.02709659
id_140052318329040	26.11239934	2.297128625	46.80497853
id_140052318330576	16.88194302	2.34520788	24.24871131
id_140052318332112	11.18033989	3.16227766	20.46948949
id_140052318333712	8.124038405	20.14944168	32.15587038
id_140052318335184	34.6121366	2.828427125	9.814954576
id_140052318336720	23.34523506	3.605551275	20.78460969
id_140052318338256	36.89173349	19.10497317	5.744562647
id_140052318372624	49.4165964	61.22907806	2.828427125
id_140052318374160	19	2	70.61161378
id_140052318375696	22.10868032	2.28332903	48.39829399
id_140052318377232	30.49590136	3.674234614	55.50675635
id_140052318378768	18.37535667	2.155449408	11.37056767
id_140052318380304	19.91658982	29.1572585	2.940847014
id_140052318381840	2.401288399	2.116802071	48.96767117
id_140052318383376	30.16620626	2.886751346	25.47547841
id_140052318384912	17.57839583	4.242640687	10.79351657
id_140052318387472	1.143717008	7.888741159	28.74343695
id_140052318387984	7.348469228	13.37908816	60
id_140052318422352	20.90454496	2	68.41783393
id_140052318423888	32.57299495	3	44.72135955
id_140052318425424	11.18033989	2.828427125	4.949747468
id_140052318426960	38.01315562	1.414213562	30.62678566
id_140052318428496	15.62343494	2	25.37920841
id_140052318430032	11.74624157	9.585103903	21.03887824
id_140052318431568	30.9354166	6.363961031	13.3041347
id_140052318433104	30.88689042	15.55634919	3.31662479
id_140052318434640	5.779831086	4.7635818	2.886751346
id_140052318436176	31.44837039	50.45790325	2.828427125
id_140052318486928	14.52583905	3	42.21374184
id_140052318488464	15	3	94.84724561
id_140052318490000	19.94993734	51.19570294	19.20937271
id_140052318491536	39.97499218	4.041451884	53.48831648
id_140052318493072	20.60975537	2.031258036	12.91800799
id_140052318494608	33.65130064	2.257923663	16.69528724
id_140052318496144	4.123105626	16.18641406	30.06659276
id_140052318497680	23.25506453	2.864904949	8.889113013
id_140052318499216	5.338539126	4.472135955	16.88194302
id_140052318500752	3.811239336	4.195181004	51.78240804
id_140052318502288	27.86080007	7.525468249	89.10477116
id_140052318520272	28.16025568	2.828427125	95.26279442
id_140052318521808	36.79184708	2.121320344	58.60691578
id_140052318523344	40.19950248	2.236067977	6.633249581
id_140052318524880	29.74894956	3.535533906	11.22497216
id_140052318526416	42.20189569	2.121320344	8.485281374
id_140052318527952	19.39352731	1.130948263	50.83723224
id_140052318529488	19.01745862	20.78855673	2.002569955
id_140052318531024	4	7.071067812	86.30179604
id_140052318532560	7.778174593	3	62.8251542
id_140052318534096	4.949747468	46.60001561	31.37669694
id_140052318535632	35.51056181	30.56141358	25.29822128
id_140052318602768	34.53983208	7.681145748	87.95453371
id_140052318604304	8.300237031	24.81256159	48.09085846
id_140052318605840	15.88917519	0	50.19529819
id_140052318607376	5.475661696	41.32622873	4.684668726
id_140052318608912	3.249248568	6.197712011	20.84292006
id_140052318610448	26.41968963	31.82766093	5.744562647
id_140052318611984	17.49285568	1.414213562	85.4341852
id_140052318613520	34.57504654	2.000006171	3.506046915
id_140052318615056	74.44461028	4.062019202	24.74873734
id_140052318616592	22.49660439	4.117661815	28.25933587
id_140052318634576	43.64630569	23.4520788	6.92820323
id_140052318636112	19.55343396	4.272321846	12.87957082
id_140052318637648	34	2.828427125	97.62171889
id_140052318639184	51.19084015	44.77454053	5
id_140052318640720	45.88004581	3.017320763	40.37788139
id_140052318642256	28.54814375	16.92287447	10.87407286
id_140052318643792	45.92385001	45.475268	55.07267925
id_140052318645328	5.932527847	1.74944496	37.17240996
id_140052318646864	10	35.57386681	47.12748667
id_140052318648400	22.23966417	3.467610859	24.6680728
id_140052318649936	42.47399904	11.02569202	22.5166605
id_140052318667920	15.03257454	3.734717495	31.99182136
id_140052318669456	32.55764119	2.828427125	8.485281374
id_140052318671056	30.21588986	10.44030651	111.3058848
id_140052318672528	5.099019514	18.92088793	18.05547009
id_140052318674064	32.78719262	2.34520788	16.0623784
id_140052318675600	55.76289089	10.77032961	13.19090596
id_140052318677136	7.615773106	26.2488095	83.54040938
id_140052318678672	5.477225575	9.899494937	30.6757233
id_140052318680208	14.76482306	1.732050808	40.01249805
id_140052318681744	45.70557953	2.828427125	24.55605832
id_140052318732496	9.899494937	2	90.62008607
id_140052318734032	15.3622915	3.464101615	25.40341184
id_140052318735568	7.03562364	16.30950643	45.04442252
id_140052318737104	9.577505518	2.138076849	23.81916733
id_140052318738640	29.92787447	2.95152932	4.000669062
id_140052318740176	4.953795856	0	46.42319928
id_140052318741712	7.681145748	26.47640459	40.55859958
id_140052318743248	35.62033499	43.30127019	3.572734564
id_140052318744784	7	86.2670273	11.48912529
id_140052318746320	37.69615365	2.828427125	12.02081528
id_140052318747856	24.43115609	5.79322269	23.80329776
id_140052318798608	27.77358457	3.02726835	71.63602081
id_140052318800144	44.78839135	2	51.19570294
id_140052318801680	37.16180835	21.3541565	3.605551275
id_140052318803216	51.3383061	9.736773421	10.62057274
id_140052318804752	24.22808288	4.242640687	7.681145748
id_140052318806288	7.862773763	1.157833902	57.44348542
id_140052318807824	13.34166406	1.414213562	11.83215957
id_140052318809360	6	0.577350269	49.85980345
id_140052318810896	110.1317393	2	45
id_140052318813456	41.58124577	3.464101615	80.38656604
id_140052318813968	6.964194139	2	45.76024475
id_140052318831952	34.18332927	2	5.049752469
id_140052318833488	21.10586562	18.51897466	51.59043758
id_140052318835024	7.121810648	0.638654844	55.30633191
id_140052318836560	51.55579502	3.464101615	21
id_140052318838096	27.22586844	13.43502884	14.14238852
id_140052318839632	25.74383149	0.055462099	43.98043913
id_140052318841168	50.08991915	8.124038405	3
id_140052318842704	13	3.674234614	28.03569154
id_140052318844240	12.54774635	1.742867622	17.24249707
id_140052318845776	2.828427125	5	100.6031809
id_140052318896528	4.062019202	2.309401077	30.8058436
id_140052318898064	4.358898944	2.449489743	35.24202037
id_140052318899600	14.64181814	42.04003657	4.734887165
id_140052318901136	4	43.02324953	19.89974874
id_140052318902672	12.56980509	4.242640687	57.98275606
id_140052318904208	16.98635182	2.470480877	58.47076649
id_140052318905808	30.82207001	2.886751346	4.949747468
id_140052318907280	9.435015615	2.196869985	36.05611786
id_140052318908816	33.23401872	2.449489743	20.68816087
id_140052318910352	43.09292285	10.67707825	8.062257748
id_140052318911888	52.78257288	4.242640687	29.26602125
id_140052318962640	56.69387853	4.489825656	7.924452427
id_140052318964176	22.02271555	2.828427125	17.49285568
id_140052318965712	3.837808882	9.661736028	47.99279051
id_140052318967248	20.92844954	46.34652091	17.01469953
id_140052318968784	25.46566316	43.13930922	9.246621004
id_140052318970320	29.22327839	46.95742753	47.86439178
id_140052318971856	25.17935662	32.87856445	14.07124728
id_140052318973392	26.2488095	3.464101615	95.96353474
id_140052318974928	10.34408043	20.51828453	2.828427125
id_140052318976464	32.09361307	6.403124237	13.74772708
id_140052318978000	37.77565354	46.14108798	5.744562647
id_140052319012368	44.21538194	4.582575695	17.97220076
id_140052319013904	70.50646896	2.975003639	8.450565642
id_140052319015440	20.14944168	22.29349681	7.483314774
id_140052319016976	35.6931366	1.154700538	22.20360331
id_140052319018512	17.43559577	33.30165161	33.54101966
id_140052319020112	33.30165161	3.16227766	21
id_140052319021584	28.58321186	3.741657387	63.56099433
id_140052319023120	4.582575695	2.886751346	44.73253849
id_140052319024656	40.41308688	2.899623225	29.31452689
id_140052319026192	29.15180062	37.61361566	17.51304183
id_140052319044176	38.301436	16.1245155	63.77303505
id_140052319045712	55.32630477	33.60803475	11.09053651
id_140052319047248	21.49418526	4.242640687	30.47129797
id_140052319048784	22.36067977	2.236067977	85.39906323
id_140052319050320	38.44009201	21.06862206	7.318866982
id_140052319051856	54.66260147	8.246211251	9.899494937
id_140052319053392	32.32645975	21.11871208	2.449489743
id_140052319054928	30.95157508	4.618802154	72.64296249
id_140052319056464	22.02271555	11.54700538	20.02498439
id_140052319058000	36.72873534	33.43650699	20.78460969
id_140052319059536	49.989999	12.36931688	8.031189202
id_140052319110288	8.785718395	28.61565239	62.94689988
id_140052319111888	19.23538406	3	44.06245567
id_140052319113360	19.6468827	1.224744871	52.73518749
id_140052319114896	2.828427125	7.615773106	18.70828693
id_140052319116432	25.64218024	2.697674861	5.001696158
id_140052319117968	17.33493582	35.22782991	7.071067812
id_140052319119504	29.44486373	2.828427125	101.0544408
id_140052319121040	11.51773049	3.392788083	86.80469999
id_140052319122576	59.40538696	9.899494937	5
id_140052319124112	16.55294536	15.5241747	4.242640687
id_140052319158480	33.62858151	0.045815836	38.49792399
id_140052319160016	17.11724277	9.899494937	4.358898944
id_140052319161552	20.0124961	3.741657387	11.66190379
id_140052319163088	10.63014581	2.121320344	26.4952826
id_140052319164624	5.744562647	2.236067977	43.8178046
id_140052319166160	4.898979486	18.02775638	17.32050808
id_140052319167696	34.69588896	52.19108232	12.76471618
id_140052319169232	34.0226055	3.699948538	53.41368266
id_140052319170768	54.42904631	1.414213562	17.26808685
id_140052319172304	7.03562364	13	83.63013811
id_140052319173840	26.03843313	51.7880295	10.46422477
id_140052319208208	21.84032967	8.366600265	18.35755975
id_140052319209744	21.23676058	7.211102551	13.41640786
id_140052319211280	5.385164807	4.69041576	2.828427125
id_140052319212880	5.356152349	3.694371552	5.952237136
id_140052319214352	30.42588106	17.86144897	10.77608982
id_140052319215888	21.11871208	33.52610923	68.33739825
id_140052319217424	13.01921657	2.828427125	8.306623863
id_140052319218960	8.366600265	14	25.7196423
id_140052319220496	15.93737745	31.11269837	18.46618531
id_140052319222032	22.95096697	5.024503475	24.66538252
id_140052319223568	2.256193513	2.344159106	41.96400511
id_140052319241552	12.40723391	6.412599018	36.87125887
id_140052319243088	30.3644529	3.464101615	42.53234064
id_140052319244624	23.4520788	3.16227766	25
id_140052319246160	46.10856753	2.828427125	50.08991915
id_140052319247696	14.89966443	2.121320344	29.563491
id_140052319249232	2.828427125	2.236067977	34.6554469
id_140052319250768	22.78445495	2.212857897	33.99062126
id_140052319252304	18.62793601	3	27.34958866
id_140052319253840	4.358898944	2.828427125	45.04442252
id_140052319255376	22.18107301	1.732050808	55.74047004
id_140052319289744	12.86468033	25.77789751	19
id_140052319291280	25.03996805	1	41
id_140052319292816	30.34798181	13.34166406	4.242640687
id_140052319294352	47.67598976	13.74772708	27.73986301
id_140052319295888	19.25890807	1.422247915	3.494782844
id_140052319297424	37.53664876	15	14.14213562
id_140052319299024	19.5192213	12.76714533	16.30950643
id_140052319300496	55.90169944	0	30.14962686
id_140052319302032	40.5920112	3.230341551	85.19966181
id_140052319303568	8.063453945	2.874537415	23.86022395
id_140052319305104	3.31662479	2	48.27007354
id_140052319372240	13.74766805	38.73569126	48.84202562
id_140052319373776	14.69693846	2.121320344	37.21558813
id_140052319375312	21.3541565	10.63014581	21.3541565
id_140052319376848	19.72768424	5.345536547	19.40924499
id_140052319378384	46.92547283	0	30.24896692
id_140052319379920	17.49952092	3.499864171	17.93937871
id_140052319381456	13.45337049	50.68994056	43.58296128
id_140052319382992	25.24864737	2	62.03719356
id_140052319384528	7.483314774	2.828427125	94.83142939
id_140052319386064	22.57859864	18.02085274	23.99921514
id_140052319387600	15.93737745	25.40341184	3
id_140052319405584	11.78982612	4.949747468	43.84062043
id_140052319407120	40.59949962	3.464101615	75.44099555
id_140052319408656	6.191042115	7.002588524	95.48845678
id_140052319410192	38.13135193	23.34523506	6.363961031
id_140052319411728	32.49615362	6.670832032	31.36877428
id_140052319413328	30.77336511	20.51828453	1.224744871
id_140052319414800	11.50039295	3.557471931	32.9478796
id_140052319416336	13.67479433	23.08679276	22.13594362
id_140052319417872	4	14.35270009	66.70082458
id_140052319419408	32.21043519	6.555951143	79.36756178
id_140052319453776	10.48808848	2	79.32843122
id_140052319455312	22.72043436	8.221639909	3.852648468
id_140052319456848	21.42428529	3.464101615	36.61966685
id_140052319458384	19.16443549	8.622018262	18.38477631
id_140052319459920	21.61645218	7.93086223	5.878451898
id_140052319461456	28.08914381	3.31662479	11.78982612
id_140052319462992	21.21320344	4.582575695	1.732050808
id_140052319464528	12.08304597	3	56.15158057
id_140052319466064	6.964194139	2.449489743	46.28174586
id_140052319467600	9.110433579	8.544003745	28.16025568
id_140052319469136	6.08276253	2.236067977	21.44761059
id_140052319536272	9.110433579	2.121320344	98.5139584
id_140052319537872	14.50893422	3.046811763	67.89077448
id_140052319539344	4.062019202	8.485281374	7
id_140052319540880	19.23538406	11.87434209	15.84297952
id_140052319542416	2.828427125	36.24913792	13.03840481
id_140052319543952	6.782329983	50.36864104	55.74047004
id_140052319545488	18.27566688	2	26.43860813
id_140052319547024	31.99809487	2.828427125	20.69335647
id_140052319548560	23.09761892	39.92492956	60.11655346
id_140052319550096	4.435699371	52.51973503	24.44712227
id_140052319568080	23.51653687	2.840327243	42.69449749
id_140052319569616	13.98702771	7.138710605	53.97761451
id_140052319571152	2.463252225	0	17.585217
id_140052319572688	20.22374842	14.33527119	4.242640687
id_140052319574224	39.11521443	2.449489743	23.43074903
id_140052319575760	20.63976744	2	59.76621119
id_140052319577296	8.717797887	21.11871208	7
id_140052319578896	4.971733459	0.572692634	29.17044119
id_140052319580368	35.44009029	1.224744871	6.32455532
id_140052319581904	104.4078541	32.64965543	4.062019202
id_140052319583440	33.2565783	7.280109889	75.45197148
id_140052319617808	32.28002478	2.34520788	27.80287755
id_140052319619344	15.93737745	2	40.41658076
id_140052319620880	52.21110993	5.787918451	35.62302626
id_140052319622416	22.36067977	1.732050808	4.358898944
id_140052319623952	20.42057786	1.732050808	70.00357134
id_140052319625488	54.89080069	0.577350269	21.9317122
id_140052319627024	13.62434358	2.17002797	10.15336176
id_140052319628560	49.85446085	25.40512232	3.471316034
id_140052319630096	23.04343724	3.605551275	20.09975124
id_140052319632656	24.37211521	2	37.85498646
id_140052319633168	8.267863355	2.289753808	49.43718222
id_140052319667536	18.47520861	2.828427125	89.58236434
id_140052319669072	15	3.464101615	46.09772229
id_140052319670608	48.28696319	3	4.903343546
id_140052319672144	31.70173497	3	34.6121366
id_140052319673680	43.62387193	2.746090355	38.3011015
id_140052319675216	64.0343634	6.157705136	4.007445224
id_140052319676752	2	49.76946855	58.72818744
id_140052319678288	16.673332	18.43908891	3.535533906
id_140052319679824	30.5450487	9.38083152	13
id_140052319681360	60.04997918	30.88689042	59.30430001
id_140052319732112	9.409089541	4	39.9352769
id_140052319733648	7.810249676	19.54482029	2.828427125
id_140052319735184	19.24389727	3.016478938	26.9332734
id_140052319736720	31.01142681	10.68294353	4.242815244
id_140052319738256	45.19955752	18.43908891	2.828427125
id_140052319739792	4.692086762	4.192618693	9.814954576
id_140052319741328	14.50831074	14.09289527	22.92980572
id_140052319742864	4.472135955	28.65309756	49.08156477
id_140052319744400	58.06031347	52.23504571	22.36067977
id_140052319745936	13.96424004	1	42.76680956
id_140052319747472	3.605551275	2	48.91829923
id_140052319781840	23.40939982	16.76305461	51.54609588
id_140052319783376	47.16990566	2.236067977	3.464101615
id_140052319784912	42.40479079	49.18660639	5.672092487
id_140052319786448	13.34166406	48.3011387	71.56116265
id_140052319787984	12.08304597	70.88018059	63.71028174
id_140052319789520	30.17875763	3.252587245	40.3627044
id_140052319791056	35.4541958	1.732050808	38.17066937
id_140052319792592	36.27785199	7.377922228	4.949747468
id_140052319794128	37.70278504	4.898979486	42.23742416
id_140052319795664	13.49073756	20.83266666	52.73518749
id_140052319797200	3	4.69041576	32.61901286
id_140052319815184	24.37211521	17.3781472	47.4341649
id_140052319816720	6.775839753	3.113509178	89.45416323
id_140052319818256	34.24908758	1.414213562	79.45438943
id_140052319819792	5.656854249	31.36877428	48.71344784
id_140052319821328	55.96514915	35.54556932	2.121320344
id_140052319822864	57.69748695	30.7408523	58.6003413
id_140052319824400	7.348469228	56.30275304	60.21627687
id_140052319825936	34.23448554	3.605551275	40.1248053
id_140052319827472	9.433981132	3	100.0949549
id_140052319829008	33.07567082	9.899494937	73.90534487
id_140052319879760	19.1989768	2.188526783	12.40530761
id_140052319881296	40.07492982	30.47950131	66.87301399
id_140052319882832	30.65941943	2.34520788	62.24146528
id_140052319884368	12.56980509	9.192388155	30.47950131
id_140052319885904	17.08558717	3.780961588	3.793034648
id_140052319887440	40.36087214	38.19685851	12.12435565
id_140052319888976	6.164414003	9.486832981	16.15549442
id_140052319890512	2.121320344	13.15294644	68.14690015
id_140052319892048	30.47153784	36.1054377	3.83046233
id_140052319893584	25.31614228	2.261703717	75.93694473
id_140052319895120	49.8682666	5.256675058	63.74448819
id_140052319945872	13.07669683	4.636809248	19.87460691
id_140052319947408	31.33687923	38.67815921	2.828427125
id_140052319949008	33.9705755	23.2594067	2.828427125
id_140052319950480	36.01388621	2.915475947	52.12485012
id_140052319952016	14.40512252	2.522539733	51.22326318
id_140052319953552	35.22782991	54.12023651	29.58039892
id_140052319955088	21.79449472	0	37.42993454
id_140052319956624	14.76482306	15.84297952	36.66060556
id_140052319958160	9	28.7923601	49.10193479
id_140052319959696	1.751063319	4.84590587	38.18813155
id_140052319994064	21.44761059	47.63402146	21.74856317
id_140052319995600	13.67606497	2.828427125	48.39857699
id_140052319997136	59.38013136	0.577350269	48.49742261
id_140052319998672	28.59195691	30.06659276	9.899494937
id_140052320000208	3.805752429	2.167490038	39.0994851
id_140052320001744	14.14213562	7.071067812	35.34119409
id_140052320003280	20.02498439	2.309401077	34.07345007
id_140052320004880	23.72762104	3.535533906	29.89983278
id_140052320006352	18.68154169	3	25.94224354
id_140052320007888	28.08914381	21.9544984	2
id_140052320009424	26.49508734	3.54108068	52.94798065
id_140052320027408	8.717797887	3	17.23368794
id_140052320028944	24.77902339	2.121320344	6.708203932
id_140052320030480	7.211102551	3.16227766	14.45683229
id_140052320032080	28.23118843	24.20743687	1.414213562
id_140052320033552	9	4.123105626	57.5847202
id_140052320035088	21.1896201	3.464101615	8.544003745
id_140052320036624	43.84062043	4.242640687	33.95585369
id_140052320038160	49.17316341	20.51828453	31
id_140052320039696	48.01041554	26.23928353	11.54700538
id_140052320041232	27.07341998	2.128575421	3.776488246
id_140052320042768	20.14944168	14.07124728	29.71531592
id_140052320093520	18.34762065	4.949747468	35.70068439
id_140052320095056	11.78982612	2.449489743	30.43024811
id_140052320096592	58.82176468	47.84349486	2.828427125
id_140052320098128	59.00007005	1.794942605	55.46086561
id_140052320099664	15.5241747	76.40680598	65.83312236
id_140052320101200	6.403124237	23.17326045	73.60027174
id_140052320102736	15.55634919	25.49509757	66.76825593
id_140052320104272	4.716977198	12.99020225	83.0036096
id_140052320105808	13.59304076	2.559691638	80.85110833
id_140052320107344	11.87434209	1.732050808	12.32882801
id_140052320141520	11.22497216	7.348469228	36.06244584
id_140052320143056	40.21193853	5.385164807	9.899494937
id_140052320144592	66.24198065	23.10844002	5.656854249
id_140052320146128	21.77154106	10.19803903	15.65247584
id_140052320147664	76.85050423	46.74398357	58.31237719
id_140052320149200	15.65247584	14.69693846	62.42595614
id_140052320150736	29.89983278	0.707106781	17.29161647
id_140052320152272	3.678312017	75.10825917	69.09694544
id_140052320153808	26.46741859	2.36117064	42.27098918
id_140052320155344	26.47640459	2.828427125	32.86335345
id_140052320156880	5.477225575	3.464101615	28.44292531
id_140052320174864	10.77032961	8.602325267	26.00961361
id_140052320176400	43.76650343	2.274779351	16.06078947
id_140052320177936	38.67815921	10.63014581	6.363961031
id_140052320179472	15.73958968	11.1572198	49.1633775
id_140052320181008	18.13835715	4.949747468	19
id_140052320182544	10.27075986	2.615234292	9.899494937
id_140052320184080	26.68332813	1	32.49615362
id_140052320185616	5.019859174	3.335122301	74.21654193
id_140052320187152	22.58317958	2.236067977	10.95445115
id_140052320189712	61.55485359	6.123724357	3.31662479
id_140052320190224	29.68164416	3.741657387	17.54992877
id_140052320257360	5.099019514	5.916079783	27.20294102
id_140052320258896	8.083026194	19.62279135	6.754616556
id_140052320260432	72.82665028	0.031680262	8.994603513
id_140052320261968	8.185352772	2.121320344	16.74315781
id_140052320263504	50.45790325	17.91647287	33.346664
id_140052320265040	2.236067977	10.44030651	12.18605761
id_140052320266576	2.341689993	9.45880282	79.09186958
id_140052320268112	52.50112501	25.57831515	47.7774822
id_140052320269648	10.09950494	3.674234614	3
id_140052320271184	52.10566188	3.605551275	3.535533906
id_140052320305552	19.4422221	4	45.74931693
id_140052320307088	49.73932046	29.3428015	2.121320344
id_140052320308624	9.052044969	3.465460147	9.38612002
id_140052320310160	10.77803698	7.095621641	39.54713311
id_140052320311696	53.28220361	2.283528174	36.13098249
id_140052320313232	56.12977664	2.828427125	17.6233598
id_140052320314832	39.11521443	25.82634314	5
id_140052320316304	6	19.8242276	18.41195264
id_140052320317840	43.76843171	5.545444118	34.67984003
id_140052320319376	6.557438524	5.338539126	35.34119409
id_140052320320912	14.95151614	1.495171585	59.55947593
id_140052320338896	31.97715059	3.481767121	15.38621747
id_140052320340432	9.695359715	2.236067977	6.164414003
id_140052320341968	39.8246155	4.949747468	11.3137085
id_140052320343504	37.55054698	0	33.09699447
id_140052320345040	5.385164807	17.89785834	10.60660172
id_140052320346576	24.20743687	3.464101615	79.21489759
id_140052320348112	34.07345007	2	28.65309756
id_140052320349648	5.099019514	2.34520788	67.38694236
id_140052320351184	13.89244399	2.121320344	41.15215669
id_140052320352720	29.82448658	2	32.52691193
id_140052320354256	21.9544984	2.236067977	5.656854249
id_140052320388624	17.34935157	7.483314774	10.34408043
id_140052320390160	66.87301399	4.041451884	4.582575695
id_140052320391696	3	2.886751346	83.19254774
id_140052320393232	11.5758369	15.74801575	46.54030511
id_140052320394768	3.776608773	2.941931692	50.89809526
id_140052320396368	29.84962311	8.336666	74.22263806
id_140052320397840	38.44476557	1.732050808	27.07397274
id_140052320399376	82.22530024	40.01249805	10.04987562
id_140052320400912	5.830951895	5.656854249	24.91987159
id_140052320402448	10.7884956	8.082903769	7.068155486
id_140052320436816	17.11799278	2.512502482	31.23469579
id_140052320438352	9.949874371	9.433981132	44.39594576
id_140052320439888	11.70469991	2.121320344	73.54590403
id_140052320441424	21.42428529	11.74734012	46.38965402
id_140052320442960	4.582575695	1.224744871	16.88194302
id_140052320444496	27.87471973	4.041451884	15.42724862
id_140052320446032	23.27015256	2.828427125	5.196152423
id_140052320447568	6.782329983	2.449489743	59.3338015
id_140052320449104	17.10822567	2.828427125	20.43266073
id_140052320450640	45.79301257	34.13209633	7.615773106
id_140052320452176	23.30007579	4.419936998	2.121320344
id_140052320502928	3.741657387	6.92820323	17.69180601
id_140052320504464	13.07669683	2.828427125	28.45171348
id_140052320506064	23.53720459	2.449489743	25.24876235
id_140052320507536	4.123105626	35.35533906	57.43692192
id_140052320509072	35.23833651	2.001626813	3
id_140052320510608	19	2.886751346	16.03121954
id_140052320512144	21.09502311	41.14608122	34.36568055
id_140052320513680	15.32970972	16.64331698	12.24744871
id_140052320515216	55.22680509	47.61302343	7.778174593
id_140052320516752	11.4414889	16.83642641	25.12802209
id_140052320567504	48.42520005	39.25557285	3.464101615
id_140052320569040	10.45906471	2	20.07736533
id_140052320570576	68.39590631	58.48931526	29.13760457
id_140052320572112	8.178817464	3.469891205	32.70265048
id_140052320573648	29.00338819	2.121320344	69.64088304
id_140052320575184	3.605551275	9.219544457	40.01249805
id_140052320576720	94.67312185	36.72873534	31.00806347
id_140052320578256	0.577350269	5	61.86275131
id_140052320579792	34.43835072	2.236067977	50.08991915
id_140052320581328	56.86826883	2.236067977	21.84032967
id_140052320582864	34.6299028	0	39.96056674
id_140052320600848	5.196152423	4.242640687	7.615773106
id_140052320602384	14.00487434	2.898534621	22.9658744
id_140052320603920	20.32240143	2.236067977	35.70714214
id_140052320605456	23.85372088	4.898979486	63.82397669
id_140052320606992	15.95796098	2.64095232	48.14933547
id_140052320608528	20.42057786	2	67.49074011
id_140052320610064	21.11871208	14.76482306	37.62977544
id_140052320611600	45.92385001	3.16227766	13.15294644
id_140052320613136	19.64908004	19.40342048	8.441439314
id_140052320615696	12.88409873	5.385164807	12.24744871
id_140052320616208	43.22539508	0	36.90729537
id_140052320683344	21.16649463	8.307329719	33.00462058
id_140052320684880	19.69467834	2.159045763	3.327442866
id_140052320686416	24.77902339	8.124038405	29.08607914
id_140052320687952	21.2331185	2.518409147	47.45891484
id_140052320689488	5.744562647	11.35781669	52.03844733
id_140052320691024	16.55294536	3.464101615	17.74823935
id_140052320692560	49.9391682	3.535533906	13.09727028
id_140052320694096	16.43167673	3.741657387	19.5192213
id_140052320695632	1.414213562	3.605551275	8.717797887
id_140052320697168	21.9317122	2	38.32753579
id_140052320715152	21.53515588	1.4969168	18.82771756
id_140052320716688	29.6157091	2	45.31247902
id_140052320718224	29.69848481	11.35781669	2.828427125
id_140052320719760	19.8106266	1.995261772	37.95905301
id_140052320721296	1.291018178	9.899494937	17.17410025
id_140052320722832	42.02380278	13.67479433	15.16575089
id_140052320724368	21.42428529	3	64.08587988
id_140052320725904	28.3019434	5.656854249	21.84032967
id_140052320727440	42.48529157	7.348469228	5.744562647
id_140052320728976	44.15880433	34.14674216	14.86606875
id_140052320730512	35.55980877	21.09502311	13.67479433
id_140052320748496	7.204577098	8.521117683	49.90439385
id_140052320750032	25.11048424	3.681243741	3.538093994
id_140052320751568	7.348469228	15.03329638	4.69041576
id_140052320753104	3.16227766	2.828427125	3.464101615
id_140052320754640	28.3019434	2.449489743	65.2725057
id_140052320756176	72.69112738	60.24118193	25.70992026
id_140052320757712	53.93514624	66.17401303	29.74894956
id_140052320759248	47.80167361	0	27.82085549
id_140052320760784	7.071067812	26.1629509	39.67366885
id_140052320762320	45.0555213	52.32590181	13.60147051
id_140052320763856	24.04163056	25.37715508	46.49731175
id_140052320830992	31.96873473	3.605551275	54.53439282
id_140052320832528	54.01851534	4.041451884	4.242640687
id_140052320834064	24.91580404	2.010956427	2.331579499
id_140052320835600	8.774964387	17.29161647	62.36184731
id_140052320837136	30.66757245	5.744562647	39.00640973
id_140052320838672	15.5241747	5.338539126	52.30678732
id_140052320840208	9.38083152	9.643650761	3.464101615
id_140052320841744	25.17935662	4.527692569	30.81395788
id_140052320843344	19.23538406	1	43.65775991
id_140052320844880	69.53416426	9.246621004	17.1464282
id_140052320879248	3	12.32882801	28.3019434
id_140052320880784	28.89636655	20.72438178	58.10335619
id_140052320882320	5.261476201	33.494853	59.31054824
id_140052320883856	7.397853655	9.961014613	4.113711097
id_140052320885392	9.187936628	16.96167051	82.09898097
id_140052320886928	27.03701167	6.442049363	28.39013913
id_140052320888464	42.42640687	9	6.164414003
id_140052320890000	7.478732097	7.071067812	44.48891383
id_140052320891536	18.6681547	10.77032961	84.59314393
id_140052320893072	17.74823935	48.02082881	81.03085832
id_140052320894608	12.04159458	2.449489743	45.66180023
id_140052320912592	17.3781472	3.16227766	7.071067812
id_140052320914128	31.40063694	21.1896201	6.363961031
id_140052320915728	15.09966887	4.472135955	41.68932717
id_140052320917264	12.24744871	3	35.0142828
id_140052320918800	21	19.31320792	38.69108424
id_140052320920336	10.5814669	12.78644929	0
id_140052320921872	44.51688951	0	39.98444731
id_140052320923408	23.53273652	2	41.49270842
id_140052320924944	4.242640687	8.602325267	18.78829423
id_140052320926480	29.11861996	9.413461596	3.035248666
id_140052320977232	19.53906637	21.03541363	46.38218631
id_140052320978768	31.591138	7.211102551	19.11805429
id_140052320980304	29.42787794	4.618802154	27.91057147
id_140052320981840	32.77193922	44.20407221	26.2488095
id_140052320983376	5.656854249	3	40.8900966
id_140052320984912	7.141428429	13.43502884	43.14510401
id_140052320986448	2.307386426	3.005147008	32.54097985
id_140052320987984	36.05551275	3.605551275	54.15717866
id_140052320989520	4.72316322	3.003440832	79.57625281
id_140052320991056	28.23118843	43.9089968	45.5521679
id_140052320992592	5.744562647	39.63584237	49.84977432
id_140052321026960	16.58312395	16.40121947	55.87486018
id_140052321028496	14.56021978	5.385164807	33.58571125
id_140052321030032	17	3	102.0098035
id_140052321031568	10.62616357	2.828541327	36.50193661
id_140052321033104	51.36146415	2.121320344	56.62155067
id_140052321034640	28.99137803	3.31662479	10.04987562
id_140052321036176	2.34520788	13.49073756	29.03446228
id_140052321037712	30.56141358	11.70469991	2
id_140052321039248	36.89173349	28.17800561	10
id_140052321040784	18.90432541	2.987777202	14.55765222
id_140052321042320	48.17675788	23.36664289	73.57988856
id_140052321060304	17.61401607	2.132596847	95.44982587
id_140052321061840	24.59136304	12.45535072	4.586651588
id_140052321063376	41.06093034	18	3
id_140052321064912	34.89870657	0.054679112	39.01525515
id_140052321066448	42.73172124	19.79898987	12.72792206
id_140052321068048	13.34166406	2.449489743	87.78382539
id_140052321069584	20.85665361	4.062019202	49.01020302
id_140052321071120	36.0727617	2.876560901	58.21585898
id_140052321072656	16.25611038	12.76343739	29.30615527
id_140052321074192	43.31281566	15.77973384	41.60528813
id_140052321141328	32.92635696	3.55E-15	13.05947601
id_140052321142864	21.96344937	4.209502948	22.20603595
id_140052321144400	4.582575695	25	39.8246155
id_140052321145936	4.429449599	2.837176879	37.70184783
id_140052321147472	19.44708063	2.938748101	31.78127224
id_140052321149008	24.10394159	15.32970972	2.449489743
id_140052321150544	18.60107524	9.848857802	8.485281374
id_140052321152080	14.35270009	2.121320344	38.75564475
id_140052321153616	29.42787794	3	83.156479
id_140052321155152	15.92179004	2.000023639	47.38006323
id_140052321156688	5.744562647	1.732050808	20.42057786
id_140052321174288	46.35191474	7.071067812	50.7740091
id_140052321175824	77.19390914	2.286584947	65.14131923
id_140052321177360	38.23610859	2.34520788	35.24202037
id_140052321178960	23.89560629	2	21.21320344
id_140052321180432	45.45327271	32.14031736	57.83165223
id_140052321181968	62.18520724	2.34520788	82.13403679
id_140052321183504	2.236067977	4.582575695	12.80624847
id_140052321185040	74.89914904	0	57.74928456
id_140052321186576	61.59552013	6.338637983	5.888903079
id_140052321188112	54.67632029	0.577350269	18.54723699
id_140052321189648	6.403124237	4.242640687	13.60147051
id_140052321224016	36.48986708	2.502811036	77.70163677
id_140052321225552	30.77336511	1.732050808	35.86084215
id_140052321227088	8.001302484	2.007131189	32.31885651
id_140052321228624	44.77722635	16.15549442	11.70469991
id_140052321230160	25.46566316	2.121320344	51.12729212
id_140052321231696	36.03843221	0.707106781	66.08330439
id_140052321233232	24.11173639	1.082690153	16.76715565
id_140052321234768	24.19998166	54.43275526	69.89155298
id_140052321236304	13.49073756	3.464101615	48.26489407
id_140052321237840	93.25770746	7.549834435	78.94935085
id_140052321272208	30.11086009	2	30.50324389
id_140052321273744	56.9473441	0.577350269	30.61045573
id_140052321275280	26.40378426	4.007668475	42.43252918
id_140052321276816	48.88251221	3.535533906	39.30648801
id_140052321278352	5.222699544	2.828942661	30.88442287
id_140052321279888	5.385164807	1.414213562	20.27313493
id_140052321281424	102.7910502	15.011107	88.51553536
id_140052321282960	45.2757679	2.374723728	18.21731349
id_140052321284496	40.16217126	14.31782106	75.98684097
id_140052321286032	28.3019434	2.828427125	15.42724862
id_140052321287568	19.33907961	38.05259518	12.4498996
id_140052321305552	74.49161027	0	63.98437309
id_140052321307088	33.91657286	2.294986509	13.83193064
id_140052321308624	24.53568829	3.31662479	9.848857802
id_140052321310160	29.01970621	2.520172948	64.55055432
id_140052321311696	27.44084547	2.236067977	31.82766093
id_140052321313232	5.099019514	37.21558813	30.8058436
id_140052321314768	11.0015711	2.309401077	36.41118649
id_140052321316304	8.329544663	3.535533906	8.778073108
id_140052321317840	13.45736574	41.10569854	52.8455006
id_140052321319376	48.24935233	5.049752469	18.24828759
id_140052321320912	95.16827202	14.31782106	81.52300289
id_140052321388048	11.44552314	5.656854249	23.67136104
id_140052321389584	30.7408523	5.656854249	22.75961335
id_140052321391120	18.81488772	2	22.58317958
id_140052321392656	26.67396618	5.922130676	0.197014924
id_140052321394192	81.74032842	15.14018002	51.92504263
id_140052321395728	15.58845727	2.828427125	41.71930009
id_140052321398352	7.499655624	3.535533906	14.94396694
id_140052321398864	56.66568627	2.828427125	20.63976744
id_140052321400400	21	2.236067977	51
id_140052321401936	99.54396014	15.90597372	85.19389649
id_140052321469072	6.041522987	2.449489743	56.08921465
id_140052321470608	17.1741934	1.500248537	24.88693979
id_140052321472144	39.47368287	37.04886596	47.37589954
id_140052321473680	20.71231518	45.45327271	88.19863945
id_140052321475216	41.89839468	2	12.42276874
id_140052321476752	66.14388597	0.027399875	26.27888071
id_140052321478288	24.35159132	1	19.74841766
id_140052321479824	0	31.46646171	17.46962666
id_140052321481360	56.8690967	20.5028225	50.20930543
id_140052321482896	29.45768247	2.833840509	22.66283751
id_140052321484432	40.57092555	4.242640687	14.28285686
id_140052321502480	36.82390528	2.828427125	54.01851534
id_140052321504016	8.885574216	2	78.15807481
id_140052321505552	18.13835715	2.449489743	29.15475947
id_140052321507088	53.60970061	9.848857802	24
id_140052321508624	23.85372088	16.97056275	5.830951895
id_140052321510160	2	3	53.82378656
id_140052321511696	96.42095208	13.43502884	82.06095296
id_140052321513232	67.690472	1.414213562	51.56549234
id_140052321514768	11.35781669	2.828427125	27.82085549
id_140052321516304	33.39161571	1	32.38826948
id_140052321534288	20.22374842	4.242640687	83.78544026
id_140052321535824	11.19004449	3.011084105	46.04648707
id_140052321537360	17.05338625	1.935447682	42.55360283
id_140052321538896	20.00168199	2.047415406	21.70612767
id_140052321540432	19.40360791	3	57.21013896
id_140052321541968	22.25766193	2.29685621	11.24477901
id_140052321543504	34.75696905	34.68769565	39.60308088
id_140052321545040	21.66794868	12.18605761	43.18564576
id_140052321546576	30.59411708	2.121320344	20.03746491
id_140052321548112	24.74668302	17.75595247	8.869191338
id_140052321549648	18.53855335	2.553487886	11.67537178
id_140052321600400	23.4520788	6.442049363	32.58834147
id_140052321601936	26.30589288	2	53.44155686
id_140052321603472	40.80441153	1	22.04540769
id_140052321605008	34.40930107	5.049752469	19.33907961
id_140052321606544	48.83646179	2	12.08304597
id_140052321608080	48.61069841	2	2
id_140052321609616	41.90513696	1.528337188	56.19438401
id_140052321611152	36.61966685	70.65408693	93.1557835
id_140052321612688	49.28488612	14.86606875	50.48762225
id_140052321614224	49.83974318	15.58845727	0.707106781
id_140052321615760	53.86086658	0	5.898402748
id_140052321633744	60.73606488	0	18.67905579
id_140052321635280	9	15.29705854	3
id_140052321636816	13.96424004	9.433981132	70.04284403
id_140052321638352	29.69848481	1.414213562	45.70557953
id_140052321639888	2.34520788	24.74873734	48.08326112
id_140052321641424	22.97825059	2.121320344	11.09053651
id_140052321642960	22.82542442	53.4976635	75.71657678
id_140052321644496	43.76258038	2.288936106	51.93317625
id_140052321646032	3.096076205	4.050608362	50.60044298
id_140052321647568	12.02081528	2	23.02172887
id_140052321681936	39.33192088	2.886751346	13.07669683
id_140052321683472	67.36331908	7.535926788	17.85388292
id_140052321685008	45.20970831	3.035506717	38.26955749
id_140052321686544	23.15167381	6	2.236067977
id_140052321688080	25.01624558	2.121320344	80.87713752
id_140052321689616	32.42215824	27.83530488	63.61546791
id_140052321691152	21.37755833	2.828427125	9.433981132
id_140052321692688	39.05607003	4.381398782	17.04318824
id_140052321694224	20.58474583	2.709734951	38.31263914
id_140052321695760	17.02938637	1.414213562	17.67766953
id_140052321697296	33.54101966	1.224744871	37.69615365
id_140052321748048	65.59032855	2.022674629	22.77414274
id_140052321749584	63.1585307	2.121320344	10.9772492
id_140052321751120	44.28317965	6.08276253	11.48912529
id_140052321752656	7.348469228	47.45524207	66.0454389
id_140052321754192	36.52773303	17.71829769	2.401854411
id_140052321755728	5.049752469	8.831760866	19.39071943
id_140052321757264	21.21320344	2.886751346	24.91987159
id_140052321758800	33.37663854	1.414213562	19.20937271
id_140052321760336	21	4.062019202	8.062257748
id_140052321761872	42.43624762	2.828427125	13.65120538
id_140052321812624	33	3.535533906	46.4865572
id_140052321814160	26.00961361	2.828427125	32.64965543
id_140052321815696	5	3.464101615	47.67598976
id_140052321817232	4.684584751	3.457744911	32.26980501
id_140052321818768	20.29398279	9.537359347	12.7589393
id_140052321820304	20.83266666	0.707106781	46.4865572
id_140052321821840	17.34935157	51	67.6609193
id_140052321823376	30.49590136	71.02816343	90.38805231
id_140052321824912	4.729994814	7.112594225	57.81394726
id_140052321826448	29.27456234	1	20.22374842
id_140052321827984	55.35792626	4.582575695	4.949747468
id_140052321862352	35.52463934	6	10.29563014
id_140052321863888	59	2.236067977	34.87119155
id_140052321865424	20.32240143	3.674234614	21.9544984
id_140052321866960	71.80529228	14.31782106	79.92496481
id_140052321868496	21.10183916	1.108089273	10.48635374
id_140052321870032	54.81788029	4.69041576	5
id_140052321871568	5.113825855	3.717028304	49.36605516
id_140052321873104	42.76714968	1.797272184	20.90374248
id_140052321874640	10.04987562	13.3041347	19.6977156
id_140052321876176	34.44737626	1.472462251	27.24909908
id_140052321877712	4.949747468	3	31.70173497
id_140052321912144	17.49285568	5	17.69180601
id_140052321913680	63.39558344	10.39230485	28.56571371
id_140052321915216	24.51530134	4.618802154	58.8812364
id_140052321916752	45.74931693	3.082207001	65.49045732
id_140052321918288	13.95091563	13.67856308	42.01376634
id_140052321919824	40.07492982	1.414213562	17.89785834
id_140052321921360	17.43902431	2.417300736	24.01237761
id_140052321922896	62.42595614	11.04536102	3.31662479
id_140052321924432	90.49309366	17.69180601	7.071067812
id_140052321925968	93.39164845	3.082207001	11.83215957
id_140052321943952	18.90232182	2	24.00394464
id_140052321945488	5.49601381	2.207758193	16.74318912
id_140052321947024	57.6020833	39.79949748	69.41901757
id_140052321948560	31.83551476	3.464101615	9.486832981
id_140052321950096	14.57200175	19.87984358	4.618802154
id_140052321951632	19.4422221	1.732050808	19.41648784
id_140052321953232	11.64068681	6.299932539	15.58845727
id_140052321954704	35.79152733	2.828427125	59.51600384
id_140052321956240	66.08173938	0	18.88889736
id_140052321957776	6.782329983	3.464101615	3.674234614
id_140052321959312	8.873473086	2.015862281	43.22933982
id_140052322026448	17.1464282	13.43502884	43.17406629
id_140052322027984	38.90372733	1	8.185352772
id_140052322029520	51.0881591	24.53568829	65.74191966
id_140052322031056	2.121320344	3.535533906	27.87471973
id_140052322032592	23.60954214	2.265075285	36.2720336
id_140052322034128	4.582575695	15.13274595	46.71188286
id_140052322035664	20.51828453	1.414213562	64.52131431
id_140052322037200	9.486832981	2.828427125	52.47856705
id_140052322038736	0	3.741657387	49.74937186
id_140052322040272	9.899494937	1.154700538	35.51056181
id_140052322041808	77.90600537	36.357937	47.07986295
id_140052322059792	7.280109889	2.34520788	90.55937279
id_140052322061328	8.062257748	8.082903769	44.45597073
id_140052322062864	46.67138624	4.197300438	10.32098137
id_140052322064400	37.12312367	3.067890092	6
id_140052322065936	56.33826408	11.22497216	8.062257748
id_140052322067536	16.15549442	2.449489743	62.14499175
id_140052322069008	28.21875277	2.20101855	79.43865917
id_140052322070544	82.7163829	0	3.535533906
id_140052322072080	38.89730068	3	4.898979486
id_140052322073616	15.42724862	3	6.403124237
id_140052322107984	28.86173938	3	61.3351449
id_140052322109520	24.77902339	3.464101615	13.45362405
id_140052322111056	51.2445119	33.13608305	69.68500556
id_140052322112592	16.55294536	4.041451884	16.74813422
id_140052322114128	27.51363298	2.915475947	7.141428429
id_140052322115664	35.39774004	2.121320344	11.44552314
id_140052322117200	29.39387691	62.17716623	87.01723967
id_140052322118736	13.85530942	4.891839488	61.30699564
id_140052322120272	42.45378419	2.302330845	3.607084897
id_140052322121808	29.9833287	1.732050808	60.34069937
id_140052322123344	6.371204015	27.11304962	11.03934398
id_140052322174096	46.04345773	1.732050808	13.34166406
id_140052322175632	47.22287581	1	21.21320344
id_140052322177232	19.20937271	7.778174593	106.3860893
id_140052322178704	34.88552709	45.48626166	27.96426291
id_140052322180240	3.078247715	3.086911352	64.37918302
id_140052322181776	12.80624847	3	12.68857754
id_140052322183312	66.01847159	0	14.83935578
id_140052322184848	21.37755833	18.49324201	25.03996805
id_140052322186384	13.67479433	7	76.4198927
id_140052322187920	1.303964689	74.48235646	57.52628064
id_140052322239248	82.15056119	0	65.96140267
id_140052322240784	46.38991803	14.01133916	6.375151333
id_140052322242320	55.47972603	2.121320344	45.90206967
id_140052322243856	11.90547036	1.04869055	61.28904349
id_140052322245456	37.69615365	2.236067977	85.5628424
id_140052322247056	10.34408043	2.236067977	28.4956137
id_140052322248592	81.0617722	0.208343094	81.82643725
id_140052322250128	8.554783908	8.638416573	34.72861855
id_140052322251664	65.00769185	14.2126704	50.48762225
id_140052322253200	37.27989745	2.121320344	26.12198131
id_140052322254736	72.31182476	1	26.19160171
id_140052322289104	38.01955327	1.215953239	25.58294874
id_140052322290640	23.6748812	8.717797887	73.19152956
id_140052322292176	57.84461946	6.403124237	75.18975994
id_140052322293712	22.75961335	48.20788317	5.656854249
id_140052322295248	25.72936066	3	30.62678566
id_140052322296784	19.33907961	2.236067977	20.04993766
id_140052322298320	21.9317122	51.41984053	62.2655603
id_140052322299856	3.049229685	5.175676013	25.49598316
id_140052322301392	62.06205892	0.577350269	24.91655145
id_140052322302928	18.13173191	2.066263401	87.61856183
id_140052322337296	15.5241747	3	41.41255848
id_140052322338832	44.51825747	0	43.0197178
id_140052322340368	23.74868417	3.535533906	75.69676347
id_140052322341904	18.23985763	20.50609665	84.15679693
id_140052322343440	4.949747468	1.414213562	31.63858404
id_140052322344976	7.267031964	23.0822491	32.68443895
id_140052322346512	12.84523258	2.121320344	54.5710546
id_140052322348048	17.52617638	15.9235418	48.75587947
id_140052322349584	5.830951895	9.643650761	15.42724862
id_140052322351120	15.97659966	4.520081545	57.18834572
id_140052322352656	18.54723699	2.886751346	39.96248241
id_140052322387024	58.46389605	21.49912994	90.80179818
id_140052322388560	85.46728018	0	76.35278314
id_140052322390096	16.1245155	3.464101615	69.6491206
id_140052322391632	45.26588119	3.31662479	40.82891133
id_140052322393168	8.94427191	9.433981132	64.35060217
id_140052322394704	38.18376618	1.732050808	41.02438299
id_140052322396240	33.79688425	0	61.18910563
id_140052322397776	35.07135583	3.741657387	44.92215489
id_140052322399312	162.7175467	75.5314504	54.52980836
id_140052322400848	7.348469228	32.06243908	5
id_140052322418832	36.72873534	6.708203932	9.899494937
id_140052322420368	35.68613176	9	86.1684397
id_140052322421904	58.27102899	28.48739958	94.43565474
id_140052322423440	7.778174593	16.91153453	59.67411499
id_140052322424976	44.95553359	6.123724357	33.95585369
id_140052322426512	3.464101615	1.732050808	74.02702209
id_140052322428112	1.837117307	48.61069841	42.47352116
id_140052322429584	34.55625492	2.121320344	10.39229121
id_140052322431120	19.6468827	2.828427125	46.5295605
id_140052322432656	27.90770872	2.01269321	10.93210733
id_140052322434192	11	6.403124237	14.17744688
id_140052322468560	47.85394446	2.236067977	30.09983389
id_140052322470160	20	7.778174593	2.915475947
id_140052322471696	20.59126028	4.041451884	86.88498144
id_140052322473232	50.6779874	10.32841209	26.27488115
id_140052322474768	48.46648326	4.123105626	43.2087954
id_140052322476304	93.16949796	0.817245551	67.68796842
id_140052322477840	7.681145748	1.732050808	3.535533906
id_140052322479376	77.75685734	1.251882293	31.47297546
id_140052322480912	34.09083261	16.15783504	5.818528229
id_140052322482512	19.79898987	5.744562647	20.73644135
id_140052322484048	21.41613859	5.867943238	72.80260131
id_140052322534864	5.204689381	15.56467724	49.09121642
id_140052322536400	41.91658383	0.707106781	46.021734
id_140052322537936	68.65857558	6.403124237	50.03998401
id_140052322539536	13.52776252	3.464101615	4.706831584
id_140052322541136	85.21278015	0	77.80169859
id_140052322542672	60.63418922	0	46.80071097
id_140052322545232	66.82065549	1	18.92088793
id_140052322545744	65.31046826	1.014196641	37.25167028
id_140052322547280	9.246621004	2.915475947	34.77786652
id_140052322548880	19.72308292	11.3137085	78.51963661
id_140052322566864	39.60561365	7.182325227	52.42821215
id_140052322568400	21.09502311	38.94868419	5.385164807
id_140052322569936	66.59579566	2.449489743	11.40175425
id_140052322571536	47.10626285	10.44030651	37.22902094
id_140052322573072	37.20215048	3	46.27094121
id_140052322574608	3.326710103	11.83465005	2.828427125
id_140052322576144	57.24660635	2.311883718	11.30136329
id_140052322577680	34.48225534	2.121320344	17.73561846
id_140052322579216	9.848857802	4.242640687	6
id_140052322581776	35.35533906	23.09761892	80.85480814
id_140052322582288	54.95452666	9.055385138	45.26588119
id_140052322649424	3.290286013	0.479762575	72.45546639
id_140052322650960	11	1.414213562	19.20937271
id_140052322652496	7	2.236067977	57.80138407
id_140052322654032	25.69046516	2.828427125	21.49418526
id_140052322655568	12.4498996	1.414213562	8
id_140052322657104	18.76166304	2.828427125	76.69419796
id_140052322658640	17.80449381	3.464101615	57.48912941
id_140052322660176	26.96479313	3.537103319	28.78251991
id_140052322661712	27.16615541	2.236067977	38.83297568
id_140052322663248	4.123105626	4.242640687	54.31390246
id_140052322697616	80.90117428	3	29.52964612
id_140052322699152	3.116432911	34.68863287	65.88368927
id_140052322700688	20.42057786	32.34192326	83.74962686
id_140052322702224	64.12487817	2.449489743	9.949874371
id_140052322703760	3.535533906	4.472135955	56.72741841
id_140052322705296	12.72792206	3	38.53569774
id_140052322706896	21.49418526	4.618802154	71.72168431
id_140052322708368	61.70677985	0.141377712	25.13597767
id_140052322709904	11.38232464	2	18.1491643
id_140052322711440	49.74937186	17.72004515	37.21558813
id_140052322712976	44.12482295	44.01136217	91.20307012
id_140052322747344	87.68694316	0	46.19523785
id_140052322748880	37	4.242640687	35.95830919
id_140052322750416	76.42643522	2.121320344	22.82542442
id_140052322751952	44.9771871	1.744532548	19.64202944
id_140052322753488	21.61076368	21.4140461	2.311155531
id_140052322755024	35.16390195	0	76.08547825
id_140052322756560	19.09188309	2.236067977	34.07345007
id_140052322758096	10.09950494	2.121320344	9.407443861
id_140052322759632	16.58312395	3.535533906	12.24744871
id_140052322761168	23.28089345	20.35927307	81.89017035
id_140052322762704	13.15294644	2.828427125	47.38143096
id_140052322797072	17.57839583	1.732050808	26.19160171
id_140052322798608	11.44552314	2.828427125	17.88854382
id_140052322800144	68.44705983	2.828427125	16.40121947
id_140052322801680	33.61382336	0.021318121	0.060351208
id_140052322803216	28.60069929	1.732050808	36.12478374
id_140052322804816	52.61014515	0	25.77614339
id_140052322807376	11.18931084	7.778174593	2.886751346
id_140052322807888	47.34448226	15.93737745	118.5495677
id_140052322809424	31.27299154	47.84349486	4.041451884
id_140052322810960	32.54228019	8	29.06028217
id_140052322845328	24.91987159	1.732050808	63.60817558
id_140052322846864	38.53569774	2.449489743	25.07987241
id_140052322848464	31.65438358	2.236067977	57.15767665
id_140052322850000	18.49324201	1.414213562	15.65247584
id_140052322851536	79.21791489	0	62.4629035
id_140052322853072	53.41558058	0.440876591	37.80193156
id_140052322854608	72.82669377	0	5.309539671
id_140052322856208	0.631853735	20.37494557	37.31304549
id_140052322857744	92.53871921	0.764799338	64.05096929
id_140052322859280	20.22374842	13.01921657	48.01041554
id_140052322860816	25.70992026	2.309401077	54.66260147
id_140052322878800	29.13760457	30.77336511	8.717797887
id_140052322880336	4.356519527	10.96965511	31.2682541
id_140052322881872	8.300812565	7.437398779	29.42092354
id_140052322883408	31.40063694	2.121320344	3.16227766
id_140052322884944	22.11334439	1.414213562	2.828427125
id_140052322886480	33.76012506	6.62367414	61.92053666
id_140052322888016	51.86038951	2.121320344	34.0147027
id_140052322889552	41.21892769	20.42057786	79.68688725
id_140052322891088	15.1090247	1.647921171	15.51076671
id_140052322892624	102.0441081	28.72281323	86.7755726
id_140052322943376	27.38612788	2.449489743	10.48808848
id_140052322944912	22.11334439	1.732050808	55.39855594
id_140052322946448	4.123105626	4.123105626	12.20655562
id_140052322947984	65.32681359	0	5.774819435
id_140052322949520	37.37907894	2	57.41223016
id_140052322951056	10.90957803	11.03652481	28.54187264
id_140052322952592	62.05642594	2.121320344	30.08321791
id_140052322954128	22.04540769	39.01281841	10.79351657
id_140052322955664	55.30822724	6	43.35896678
id_140052322957200	9.899494937	18.27566688	49.60846702
id_140052322958736	11.18033989	20.85665361	11.85326959
id_140052322976720	51.31276644	2.886751346	15.55634919
id_140052322978256	34.49637662	16.58312395	3.464101615
id_140052322979792	55.2255846	1.019852352	37.04715818
id_140052322981328	90.89004346	1.224744871	66.06814664
id_140052322982864	12.20655562	2.121320344	15.23154621
id_140052322984400	12.14594038	2.363466623	19.27096444
id_140052322985936	10.6892422	4	37.85012582
id_140052322987472	34.17280362	14.26414081	46.48433981
id_140052322989008	45.82575695	2.121320344	69.71728624
id_140052322990544	11.7260394	31.40063694	18.78829423
id_140052322992080	66.70832032	2	35.0142828
id_140052323042832	36.63331817	2.121320344	47.05316142
id_140052323044368	53.32447843	12.38951169	3.464101615
id_140052323045904	44.91102315	3.605551275	30.29851482
id_140052323047440	14.07124728	53.88877434	96.43132271
id_140052323048976	4.125901125	30.58535511	63.97575558
id_140052323050576	22.4749701	2.267283498	50.2052758
id_140052323052048	38.55761148	3	9.341059833
id_140052323053584	34.10898386	2.84E-14	12.2676789
id_140052323055120	12.32882801	36.41428291	6.403124237
id_140052323056656	53.70718556	7.085785638	4.012933806
id_140052323123792	19.13112647	2.449489743	47.97916214
id_140052323125328	2.121320344	2.121320344	24.35159132
id_140052323126864	16.3894351	3.032496977	63.77919532
id_140052323128400	9.899494937	2	26.43860813
id_140052323129936	50.64582905	1.224744871	25.94224354
id_140052323131472	3.543799532	2.121320344	32.70856394
id_140052323133008	35.74912586	1	11.44552314
id_140052323134544	33.23401872	3.31662479	40.57092555
id_140052323136080	48.08326112	2.121320344	47.87483681
id_140052323137616	27.55005761	5.461580031	3.720496814
id_140052323139152	4.875515084	7.109074772	13.75186797
id_140052323173520	62.46599075	0.707106781	40.75536774
id_140052323175120	41.89853892	0	33.25635978
id_140052323176592	42.39905885	2.239651931	39.03685933
id_140052323178128	10.19803903	13.37908816	14.45683229
id_140052323179664	27.22131518	36.23534186	64.68384652
id_140052323181200	41.27953488	3	45.254834
id_140052323182736	44.32832052	2.828427125	45.02221674
id_140052323184272	20.97617696	1.732050808	24.61706725
id_140052323185808	4.253686362	6.018641966	11.33620594
id_140052323187344	35.80502758	2.34520788	29.13760457
id_140052323221712	12.96366057	2.500715154	20.0371985
id_140052323223248	39.30648801	10.60660172	68.48357467
id_140052323224784	43.13930922	22.8035085	95.60334722
id_140052323226320	17.57839583	48.36320916	61.74139616
id_140052323227856	11.93619445	3.01825577	59.34475834
id_140052323229392	26.0959767	6.670832032	30.69201851
id_140052323230928	30.9354166	1.414213562	35.665109
id_140052323232464	42.90138463	0	1.66692341
id_140052323234000	29.30318223	0.227146767	55.00022435
id_140052323235536	4.242640687	2.121320344	42.11887938
id_140052323237072	41.01225182	3	29.63100611
id_140052323304784	10.90979923	15.20710578	51.37765485
id_140052323306320	28.12845785	4.41741676	47.95118937
id_140052323307856	6.670832032	2.121320344	59.78294071
id_140052323309392	39.3192065	0	94.5409964
id_140052323310928	48.7031343	2.467654165	68.84477279
id_140052323312464	22.11334439	24.04163056	118.6781361
id_140052323314000	5.830951895	26.2488095	100.5335765
id_140052323315536	67.5775193	0.763357179	45.14973128
id_140052323317072	87.93747779	3.535533906	2.121320344
id_140052323318608	61.40032573	4.358898944	7
id_140052323353040	16.30946979	4.993176582	38.2696198
id_140052323354640	4.242770833	13.93945806	45.35988944
id_140052323356176	18.33049861	0	28.74192322
id_140052323357712	30.01268291	2.588676014	9.328446493
id_140052323359248	22.02271555	35.58089375	10.48808848
id_140052323360784	43.27817002	2	7.874007874
id_140052323362320	26.9351072	2.886751346	78.70196948
id_140052323363856	52.64028875	8.774964387	12.12435565
id_140052323365392	47.81213235	1.732050808	67.66830868
id_140052323366928	44.56381685	27.35970764	58.49220262
id_140052323368464	16.76381695	2.121320344	92.03965006
id_140052323419216	47.18050445	26.69269563	68.60757976
id_140052323420752	178.8686669	74.65922582	43.47413024
id_140052323422288	6.08276253	1.224744871	106.5316854
id_140052323423824	2.76332588	11.3669385	22.22566018
id_140052323425360	39.33192088	3.741657387	4.358898944
id_140052323426896	7.018869684	0	22.27247529
id_140052323428432	3.605551275	2	90.02777349
id_140052323429968	69.89635184	3.31662479	33.63034344
id_140052323431504	17.97220076	51.93264869	53.82378656
id_140052323433040	54.60769177	13.92838828	44.98888752
id_140052323467408	33.23166921	2.374631707	23.89865323
id_140052323468944	16.88194302	19	92.84934033
id_140052323470480	31.20897307	3.464101615	11.35781669
id_140052323472016	43.28972164	2	15.55634919
id_140052323473552	34.0881211	10.48808848	39.39543121
id_140052323475088	25.15949125	1	114.629839
id_140052323476688	12.09073011	20.67718716	9.145384788
id_140052323478160	53.07541804	14.76482306	26.70205985
id_140052323479696	66.84309987	0	19.79898987
id_140052323481232	45.29900661	18.84144368	68.85128902
id_140052323482768	80.1685724	2.828427125	18.02775638
id_140052323533584	21.26029163	2.828427125	5
id_140052323535120	43.88621651	2.449489743	21.1896201
id_140052323536656	64.89221833	3.16227766	32.71085447
id_140052323538256	17.60681686	6.670832032	32.24903099
id_140052323539728	43.73785546	3.741657387	91.02197537
id_140052323541264	50.84289528	2	8.746427842
id_140052323542800	15.58845727	21.79449472	9.407443861
id_140052323544336	39.96500861	2.912085239	75.08509349
id_140052323545872	9.605085429	11.32665365	51.94200718
id_140052323547408	29.9833287	2.828427125	54.13871073
id_140052323548944	33.83784863	0	71.50524456
id_140052323566928	48.38388161	3.674234614	25.23885893
id_140052323568464	12.36931688	2.449489743	12.18605761
id_140052323570000	39.9592292	2.379402574	5.488846095
id_140052323571536	32.95451411	0	47.27578661
id_140052323573072	15.29705854	5.049752469	54.95452666
id_140052323574608	36.59231806	1.732050808	36.11257361
id_140052323576144	46.49731175	29.76575213	77.30459236
id_140052323577680	11.20053763	2.828427125	4.078206333
id_140052323579216	31.52776554	6.92820323	9.055385138
id_140052323580752	58.74593893	0.710016571	26
id_140052323615120	46.10856753	1.414213562	60.14981297
id_140052323616656	20.27313493	17.52141547	35.74912586
id_140052323618192	9.899494937	4	42.29657197
id_140052323619792	22.49444376	2.828427125	75.96709814
id_140052323621392	17.62717749	2.275756573	69.4402812
id_140052323622864	81.28960573	5.385164807	45.62893819
id_140052323624400	38.13135193	4.527692569	6.363961031
id_140052323626000	47.21228654	28.16025568	69.53416426
id_140052323627536	43.43798747	15.05951007	2.867172839
id_140052323629072	9.071934884	3.048779957	24.17632651
id_140052323630608	71.02816343	51.19570294	92.28217596
id_140052323697744	17.02938637	3	18.49324201
id_140052323699280	35.15679166	2.236067977	30.757113
id_140052323700816	31.05259371	18.54473875	46.66987407
id_140052323702352	20.04993766	3	44.67661581
id_140052323703888	46.07602413	2.828427125	4.582575695
id_140052323705424	9.273618495	3.535533906	86.61408661
id_140052323706960	49.01775121	6.697461897	28.45689059
id_140052323708496	41.01219331	1.224744871	42.94182111
id_140052323710032	11	2.828427125	10.95445115
id_140052323711568	24.73863375	2	58.5918083
id_140052323729552	4.123105626	0	24.69817807
id_140052323731088	52.49761899	1	47.07440918
id_140052323732624	13.61136795	0	22.20491121
id_140052323734160	14.16823031	2.217901121	31.10053188
id_140052323735696	5.018744372	1.160074515	39.15468009
id_140052323737232	37.33630941	14.45683229	63.34824386
id_140052323738832	26.1629509	3.464101615	48.74423043
id_140052323740304	6.153118628	1	77.51486595
id_140052323741840	20.51828453	3	79.12648103
id_140052323743376	94.11693755	21.22790044	0
id_140052323744912	17.67766953	3	29.563491
id_140052323762896	62.10475022	3	18.35755975
id_140052323764432	78.03008055	0.969980982	65.20825964
id_140052323765968	3	2.34520788	20.4450483
id_140052323767504	2.121320344	75.33923281	5.196152423
id_140052323769040	27.22131518	9.237604307	69.67065379
id_140052323770640	32.89376841	3.464101615	11.83215957
id_140052323772176	3.714818639	2.854328913	48.16047467
id_140052323773712	7.071067812	8.031189202	56.50663678
id_140052323775248	119.80818	46.07602413	110.5667219
id_140052323776784	162.0223633	46.71422755	46.49533013
id_140052323778320	39.2173431	7.810249676	93.10746479
id_140052323829072	83.53012083	0	79.84522767
id_140052323830608	5.665151875	44.07149015	59.17461366
id_140052323832144	20	31.06444913	6.403124237
id_140052323833680	46.50806382	12.04159458	31.1608729
id_140052323835216	63.5767253	2	31.08054054
id_140052323836752	39.66391327	28.47838538	6.578244257
id_140052323838288	11.88170857	2.427942517	14.07803938
id_140052323839824	50.72474741	2.236067977	11.78982612
id_140052323841360	15.55634919	2	26.40075756
id_140052323842896	20	2	84.09022449
id_140052323893648	17.20465053	56.5862174	55.03635162
id_140052323895184	5.385164807	7.810249676	12.08304597
id_140052323896720	90.46546302	3.31662479	61.84658438
id_140052323898256	81.04936767	1	32.39598741
id_140052323899792	26.46696054	7.874007874	19.05255888
id_140052323901328	22.89104628	3.535533906	79.35363886
id_140052323902864	77.83315489	19.10497317	1.732050808
id_140052323904400	1.224744871	2.828427125	10.29563014
id_140052323905936	38.83140422	2.00883732	35.23682924
id_140052323907472	7.57443587	3	35.72439016
id_140052323909008	48.39421453	0	55.58776844
id_140052323926992	43.8178046	0	47.38143096
id_140052323928528	38.08783705	2	71.33369951
id_140052323930064	95.53009997	2.449489743	68.27884006
id_140052323931600	39.81205847	4.618802154	44.41846463
id_140052323933136	22.91180808	3.032833445	49.67364609
id_140052323934672	1.074186942	7.969922233	36.57274291
id_140052323936208	34.01015881	1.414213562	87.73402768
id_140052323937744	33.51909182	1.154700538	37.14212894
id_140052323939280	5	12.72792206	52.32590181
id_140052323940816	86.72172435	0	66.84737604
id_140052323942352	46.15192304	2.309401077	52.35456045
id_140052324009552	13.31146693	0.624746431	51.43624145
id_140052324011088	23.53720459	17.23368794	28.37252192
id_140052324012624	9.486832981	10.02496883	92.17917335
id_140052324014160	12.74758746	45.07994122	30.7930079
id_140052324015696	54.67174773	9	64.93843238
id_140052324017232	69.8140387	23.43074903	78.96201618
id_140052324018832	65.61249881	4.69041576	20.20725942
id_140052324020368	53.20033337	3.708863634	8.539925058
id_140052324021968	24.10394159	4.472135955	19.23538406
id_140052324023504	7.549834435	9.433981132	26.1629509
id_140052324041488	22.43127959	2.987954192	66.96890219
id_140052324043024	30.38091506	2.121320344	20.09975124
id_140052324044624	9.167262165	1.618813649	5.959800278
id_140052324046224	2.236067977	7.071067812	50.72474741
id_140052324047760	34.06649787	3.249296775	53.79314049
id_140052324049296	41.95235393	9.539392014	78.41555968
id_140052324050832	6.164414003	19.94993734	45.61797891
id_140052324052368	7.657872447	19.31475136	23.09196226
id_140052324053904	8.544003745	4.527692569	20.32240143
id_140052324055440	10.44030651	13.37908816	23.33452378
id_140052324056976	8.346116222	3.598170028	30.75234206
id_140052324091344	43.37049688	21.42428529	2.121320344
id_140052324092880	42.42640687	13.89244399	101.0544408
id_140052324094416	19.10497317	2.828427125	55.23585792
id_140052324095952	41.78864369	0	49.49574071
id_140052324097488	18.48444092	0	4.67956668
id_140052324099024	18.49324201	2.236067977	95.54580054
id_140052324100560	36.85661607	10.08619119	96.73635611
id_140052324102096	55.91064299	4.123105626	40.02499219
id_140052324103632	49.35585072	10.86278049	32.44996148
id_140052324105168	18.26454513	8.120236253	48.88507629
id_140052324139536	9.797958971	4	34.3220046
id_140052324141072	99.52889028	0	45.18849411
id_140052324142608	53.01886457	3.16227766	80.08120878
id_140052324144144	16.26345597	5.477225575	81.61494961
id_140052324145680	47.45524207	0	123.7780271
id_140052324147216	36.46916506	2.121320344	8.336666
id_140052324148752	38.20699285	3.731501109	40.30674705
id_140052324150288	20.63976744	17.72004515	50.6359556
id_140052324151824	14.03566885	26.0959767	44.72135955
id_140052324153360	54.16641026	17.72004515	90.64766958
id_140052324154896	56.38262144	19.07878403	2
id_140052324172880	22.737634	2.236067977	59.06352512
id_140052324174416	8.746427842	1.732050808	74.16872656
id_140052324175952	12.04159458	7.615773106	84.69356528
id_140052324177488	27.29468813	36.02776707	23.93741841
id_140052324179024	34.46737588	4.242640687	31.84336666
id_140052324180560	61.69278726	1	3.535533906
id_140052324182096	43.54882318	0	40.42276586
id_140052324183632	12.72792206	2.828427125	60.24118193
id_140052324185168	21.54288729	7.040140339	46.65714272
id_140052324186704	3.464101615	13.15294644	60.63827174
id_140052324237456	39.63584237	2.236067977	32.14031736
id_140052324238992	21.9317122	3	77.83957862
id_140052324240528	5.787918451	2	47.38143096
id_140052324242064	38.27531842	1.732050808	5.830951895
id_140052324243600	43.80371991	0	27.18830437
id_140052324245136	14.45683229	0.707106781	22.71563338
id_140052324246672	46.27094121	1	68.42148785
id_140052324248208	13.15562029	15.16808494	89.9870791
id_140052324249744	7.874007874	2.886751346	42.3792402
id_140052324251280	36.79359216	15.37563835	71.35055972
id_140052324252880	21.40093456	1.732050808	47.21228654
id_140052324320016	9.899494937	2.121320344	19.05255888
id_140052324321552	19.10276846	2.275459099	19.86850827
id_140052324323088	35.45898315	20.79969568	1.561594168
id_140052324324688	22.29349681	6.363961031	19.67231557
id_140052324326160	53.97221507	15.84297952	28.33725463
id_140052324327696	44.31703961	4.123105626	89.56003573
id_140052324329232	9.433981132	10.34408043	28.33725463
id_140052324330768	7.10002487	2.905710505	32.35972689
id_140052324332368	43.9089968	1.732050808	63.31666447
id_140052324333904	6.004851269	2.312098736	57.54713285
id_140052324335504	22.82542442	2.828427125	56.40035461
id_140052324353488	24.554814	3.28008413	94.29196488
id_140052324355024	23.09491286	1.414213562	65.17668295
id_140052324356560	35.24202037	2.449489743	79.12648103
id_140052324358096	45.81484476	41.09744518	11.44552314
id_140052324359632	35.63705936	0	86.45808233
id_140052324361168	2.236067977	3.464101615	39.97499218
id_140052324362768	42	2.886751346	36.74234614
id_140052324364304	22.56102835	23.68543856	15
id_140052324365840	14.45683229	1.414213562	33.54101966
id_140052324367376	38.54867053	3	46.1356695
id_140052324385360	21.70616435	10.17967358	108.4035041
id_140052324386896	20.59691681	2	34.02311139
id_140052324388432	44.69899328	2	32.83291032
id_140052324389968	4.623310502	1.414213562	21.9544984
id_140052324391504	10.45244177	1.481379081	111.5087883
id_140052324393040	36.26292873	2.236067977	24.35159132
id_140052324394576	98.31073187	3.16227766	43.54308211
id_140052324396112	21.65640783	16.15549442	141.6686274
id_140052324397648	14.41745486	2.726607777	2.302632671
id_140052324399184	15.22916993	1.579180097	19.60205886
id_140052324400720	30.24896692	24.59674775	3.535533906
id_140052324451472	19.01315334	2	55.90169944
id_140052324453072	40.5092582	17.2626765	53.68426213
id_140052324454544	64.34538115	16.67481379	77.02806893
id_140052324456080	60.0124987	2.236067977	75.8419409
id_140052324457616	64.84007849	20.39246481	1.414687106
id_140052324459152	35.21363372	3.464101615	97.78547949
id_140052324460688	27.91057147	28.60069929	41.02438299
id_140052324462224	139.5460882	34.22583883	58.95874172
id_140052324463760	23.60084744	3.31662479	6.363961031
id_140052324465296	17.50341346	2.236885821	25.20313191
id_140052324483280	32.38054972	22.20360331	81.17265549
id_140052324484816	12.84523258	3.535533906	75.29276194
id_140052324486352	20.63976744	3.605551275	56.54201977
id_140052324487888	39.3192065	3	47.68647607
id_140052324489424	1.17260394	3.605551275	48.67237409
id_140052324490960	23.21310735	27.67169418	15.8937625
id_140052324492496	30.13303835	9.192388155	30.46309242
id_140052324494096	5.745017094	12.77454069	109.7046851
id_140052324495568	36.95040686	9.909548476	49.00381133
id_140052324497104	6.480740698	13.43502884	30.78960864
id_140052324498640	6.475484752	8.932024353	64.24638136
id_140052324565840	18.89270551	2.900817923	17.32893019
id_140052324567440	18.84144368	0	93.9946807
id_140052324568976	5.047625904	2.828661591	27.14788801
id_140052324570512	40.58494571	2.932138849	63.03604532
id_140052324572048	18.5876303	2.828427125	19.09188309
id_140052324573584	34.88630057	2.135816762	56.04538123
id_140052324575120	6.354132514	3.674234614	52.32590181
id_140052324576656	22.97524264	15.5666594	6.261979264
id_140052324578192	13.60147051	33.9705755	45.61067127
id_140052324579728	9.620002103	10.18239113	11.69584387
id_140052324581264	34.6714237	0	82.47140468
id_140052324615632	24.93992783	22.71563338	76.75285011
id_140052324617168	23.79075451	5	36.05551275
id_140052324618704	29.76657387	3.212038278	2
id_140052324620240	34.19064199	34.0147027	8.544003745
id_140052324621776	31.01522763	0.91718122	41.43398577
id_140052324623312	29.81610303	46.65833259	14.31782106
id_140052324624848	43.9089968	2	42.3083916
id_140052324626384	31.78049716	3.464101615	77.33369253
id_140052324627984	21.79449472	4.242640687	51.90375709
id_140052324629520	9.634232065	1.618853186	12.02399214
id_140052324680272	21.3541565	3	9.949874371
id_140052324681808	26.30589288	2.449489743	22
id_140052324683344	59.67411499	3.674234614	11.40175425
id_140052324684880	11.18033989	7.141428429	62.89674077
id_140052324686416	35.06788864	1.002670966	58.00479088
id_140052324687952	55.33534133	34.05877273	45.79301257
id_140052324689488	15.26433752	2.828427125	114.9826074
id_140052324691024	25.78759392	5.916079783	14.86606875
id_140052324692560	30.56141358	10.65363788	33.27160952
id_140052324694096	44.56042581	0.707106781	64.52462847
id_140052324695632	20.68816087	2.121320344	65.37583651
id_140052324730000	20.83266666	3.605551275	50.69516742
id_140052324731536	16.88194302	17.33493582	87.82368701
id_140052324733136	30.13567338	3.127579562	48.13008906
id_140052324734608	7	23.02172887	5.049752469
id_140052324736144	19.6468827	11.5758369	37.33630941
id_140052324737680	32.40940987	6.099363632	90.2078346
id_140052324739216	25.62632248	0	77.32876274
id_140052324740752	11.35781669	5.656854249	26.00961361
id_140052324742288	15.17745794	17.88007834	1.798833554
id_140052324743824	45.16635916	45.27692569	116.3529114
id_140052324761808	29.03446228	1	46.41120554
id_140052324763344	8.246211251	2.34520788	126.0991673
id_140052324764880	25.70992026	17.97220076	56.36488268
id_140052324766416	51.86520992	2	13.67479433
id_140052324767952	6.403124237	2	29.44486373
id_140052324769488	44.20407221	1.732050808	54.41966556
id_140052324771024	4.69041576	24.77902339	6.480740698
id_140052324772560	23.11264797	19.69118338	8.261865096
id_140052324774096	54.73572873	4.041451884	38.60051813
id_140052324775632	13.60147051	15.14925741	22.64950331
id_140052324777168	34.2206625	1.81773617	13.53103205
id_140052324811536	32.35191693	2.455373325	68.47161434
id_140052324813072	40.26164428	2.828427125	66.03786792
id_140052324814608	79.06326581	12.08304597	33.42154993
id_140052324816208	5.273237048	26.00975318	24.51055867
id_140052324817680	52.43711709	4.641792139	66.10768558
id_140052324819216	33.13608305	4.898979486	26.77685568
id_140052324820752	18.11077028	2.828427125	75.11324783
id_140052324822288	32.46536616	3.674234614	57.81003373
id_140052324823824	4.490687072	4.488893325	3.286151783
id_140052324825360	22.40313728	0.720425599	43.56253374
id_140052324826896	48.67237409	18.6681547	5
id_140052324877648	19.79898987	2.915475947	95.65040512
id_140052324879184	20.61552813	38.40572874	57.21013896
id_140052324880720	18.05547009	4	130.3418582
id_140052324882256	35.93048845	2	35.22782991
id_140052324883792	37.60319135	2	51.61879503
id_140052324885392	38.71692137	4.949747468	43.94314509
[truncated: 972 more rows]

## Sheet: C_table
Ca. Xociella bifrons distance matrix
cell_id	CtoT	CtoS	CtoB
id_140370304828112	8.757885836	10.00082644	5.8588925
id_140370304829712	64.89221833	36.07630802	22.82542442
id_140370304831248	84.72644276	5.68E-14	12.47298547
id_140370304832784	75.00002605	2.849392564	5.886961102
id_140370304834320	61.68933642	8.109552676	4.696939077
id_140370304835920	22.09072203	7.810249676	12.24744871
id_140370304837456	41.10719032	1.692789135	2.240433569
id_140370304838992	12.12435565	11.70469991	1.732050808
id_140370304840528	79.19249277	23.46560901	10.27099633
id_140370304842064	20.82066281	7	5.477225575
id_140370304843600	56.00892786	43.56604182	4.582575695
id_140370304910736	48.5386444	3.674234614	2.828427125
id_140370304912272	43.01011088	9.62770974	17.6232528
id_140370304913808	14.62873884	17.32050808	11.54700538
id_140370304915344	74.91662032	14.31782106	13.07669683
id_140370304916880	54.26959521	5.142323982	4.622733823
id_140370304918416	25.94647602	4.735627351	10.29601728
id_140370304919952	67.8657141	6.00348915	10.86200007
id_140370304921488	91.40274912	4.625633104	9.432514095
id_140370304923088	49.97508332	47.89905264	8.166417961
id_140370304924560	7.681145748	12.70826503	12.88409873
id_140370304958928	28.4956137	30.6757233	13.41640786
id_140370304960464	40.12298868	6.527632164	3.218719572
id_140370304962000	69.93704761	27.79380222	23.3385572
id_140370304963536	26.80986253	27.3150564	8.5622973
id_140370304965072	43.60668886	6.45414817	4.078595044
id_140370304966608	32.42062694	13.38387031	9.364093482
id_140370304968144	83.87527396	23.20378675	10.56217064
id_140370304969680	28.33725463	26.15339366	11.91637529
id_140370304971216	5.338539126	31.46426545	2.828427125
id_140370304972752	85.35806933	2.121320344	7.483314774
id_140370304974288	42.04759208	28.39013913	12.16552506
id_140370304992272	64.2804011	14.96275389	8.652425791
id_140370304993808	10.11771038	21.6254551	22.24197776
id_140370304995344	87.41733519	41.40502481	23.55399772
id_140370304996880	0.707106781	11.3137085	4.063329951
id_140370304998416	35.61860071	6.779732968	11.00261284
id_140370304999952	58.1623967	41.88259821	12.70989133
id_140370305001488	27.80108522	9.935252193	12.24616508
id_140370305003024	69.19537557	20.61552813	13.6381817
id_140370305004560	8.293119377	3.328763523	12.00371595
id_140370305006096	52.82045058	40.82891133	20.14944168
id_140370305024080	15.02452055	36.21167251	14.04155019
id_140370305025616	86.67756342	69.6634768	34.71310992
id_140370305027152	51.6139516	4.242640687	3.605551275
id_140370305028688	57.643541	56.86281521	12.68415388
id_140370305030224	2.53553562	16.47288619	7.344996712
id_140370305031760	66.02373612	51.14532354	2.084824192
id_140370305033360	25.67099531	11	5.385164807
id_140370305034896	36.95943723	3.464101615	4.062019202
id_140370305036432	58.80921039	13.89331209	13.00153929
id_140370305037968	58.95221212	17.81885005	2.08821522
id_140370305039504	9.282785833	0	5.152987011
id_140370305123024	65.22273647	15.58129316	4.850773784
id_140370305124560	56.59505279	54.15717866	21.1896201
id_140370305126096	33.346664	12.80624847	25.67099531
id_140370305127632	65.06257983	16.93876862	9.208229859
id_140370305129232	32.33358113	4.589734224	14.6940077
id_140370305130768	61.58816507	2.70925812	7.520913997
id_140370305132304	87.72174649	4.041451884	5.682908212
id_140370305133904	20.9464504	3.261998208	2.084862451
id_140370305135440	29.03000762	25.21616254	36.94592329
id_140370305136976	9	26.2488095	6.164414003
id_140370305138512	33.14107449	43.2089486	31.20379944
id_140370305156496	43.4281015	0.707106781	18.81488772
id_140370305158032	27.45507713	5.490108318	3.183055694
id_140370305159568	5.315611433	3.918764304	3.047953504
id_140370305161104	62.34982055	4.220353981	4.87656116
id_140370305162640	27.5001919	2.015121703	5.786035325
id_140370305164176	29.68164416	27.33130074	18.92088793
id_140370305165776	59.10847465	61.90258688	16.06378059
id_140370305167312	32.19631631	0	4.631741552
id_140370305168848	0.028658256	61.09764704	4.639884765
id_140370305170448	9.690811868	11.02023587	3.179978885
id_140370305204880	82.13542074	1	13.60267412
id_140370305206480	46.34259739	4.4360274	6.443515738
id_140370305208080	44.27649203	3.50727958	2.411009386
id_140370305209616	20.20725942	34.14674216	21.11871208
id_140370305211152	50.00600169	6.245778403	21.1369284
id_140370305212688	59.52465154	19.09457697	12.93627635
id_140370305214224	54.46099522	69.46581893	12.08304597
id_140370305215760	56.19306637	5.688071974	2.739998441
id_140370305217296	46.20355948	11.31418478	26.37867236
id_140370305218832	42.59146783	13.13460195	2.121320344
id_140370305220368	56.78908346	7.071067812	6.403124237
id_140370305271120	49.67841498	8.82712497	18.53453863
id_140370305272656	13.50989702	21.166659	1.616648754
id_140370305274192	13.19413193	23.00168606	8.292712774
id_140370305275728	64.63624963	9.471461443	15.86583452
id_140370305277264	13.08330146	16.94320775	4.773563762
id_140370305278800	12.88409873	0	5
id_140370305280336	31.04834939	16.15549442	7.681145748
id_140370305281936	39.89987469	9.407443861	3.605551275
id_140370305283536	23.22683598	25.32522279	32.58848873
id_140370305285008	8.273496598	28.06615862	5.140948614
id_140370305302992	68.5096721	5.489580684	13.26184829
id_140370305304528	99.47301799	11.41291641	7.084456073
id_140370305306064	51.23475383	17.23368794	4
id_140370305307600	21.25082746	10.31768402	3.042347252
id_140370305309136	91.59914933	15.71725831	4.741314527
id_140370305310672	13.63856198	7.644503216	8.272230538
id_140370305312272	87.74695827	3.736490567	3.157855166
id_140370305313872	10	23.28089345	5.385164807
id_140370305315472	50.09279831	38.08361246	22.97517712
id_140370305317008	32.01562119	14.86606875	6
id_140370305318544	30.95157508	14.79864859	7.03562364
id_140370305352912	28.91366459	13.74772708	6.363961031
id_140370305354448	27.85677655	13.45362405	7.483314774
id_140370305355984	24.74873734	15.77973384	0.707106781
id_140370305357520	44.24929378	68.02940541	17.43559577
id_140370305359120	30.05898274	52.810544	27.91884075
id_140370305360656	7.681145748	16.61324773	13.34166406
id_140370305362192	49.60846702	4.242640687	5.099019514
id_140370305363728	83.60023923	9.273618495	24.77902339
id_140370305365264	33.31997446	39.32057104	4.982552126
id_140370305366800	54.96362433	15.55634919	7.03562364
id_140370305401168	62.20128616	19.4422221	12.68857754
id_140370305402768	21.12914772	70.77233389	7.105665647
id_140370305404304	15.5241747	8.124038405	18.35755975
id_140370305405840	16.09347694	4.898979486	4.123105626
id_140370305407376	52.35456045	7.141428429	13.27905619
id_140370305408976	7.562269728	42.32946327	14.20297929
id_140370305410512	89.09086915	7.053213827	15.00001151
id_140370305412048	11.63073465	8.157288127	7.368130989
id_140370305413584	49.01936396	51.11824327	10
id_140370305415184	24.37211521	10.34408043	9.433981132
id_140370305416784	57.45432969	12.84523258	16.24807681
id_140370305451152	43.37049688	13.67479433	7.681145748
id_140370305452688	29.59387102	14.14219648	9.559773226
id_140370305454288	10.93576034	5.267782725	3.274957708
id_140370305455824	10.83144307	35.2690415	14.52996435
id_140370305457360	28.03344901	1.168799621	3.847782422
id_140370305458896	41.08527717	4.898979486	6
id_140370305460432	37.00675614	12.04159458	14.52583905
id_140370305461968	6.285571346	62.35875925	5.038122566
id_140370305463568	39.01722513	3.535533906	4.999764296
id_140370305465104	17.18303634	45.45688955	4.223380147
id_140370305499472	41.48493703	2.121320344	13
id_140370305501008	10.79351657	6.782329983	12.32882801
id_140370305502544	19.07609941	9.45462514	4.954249181
id_140370305504144	31.90611227	4.69041576	5.099019514
id_140370305505680	3.535533906	18.57417562	33.42154993
id_140370305507216	57.218878	9.695359715	3.16227766
id_140370305508752	2.2286955	62.66060067	24.56647608
id_140370305510288	101.3360745	2	19.26136028
id_140370305511888	3.102389353	27.54756713	13.01546285
id_140370305513424	12.49099609	33.85860689	34.53975584
id_140370305515024	30.21889686	52.25189945	5.60512376
id_140370305582224	81.76184929	5.385164807	9.110433579
id_140370305583760	5.916079783	41.91658383	22.29349681
id_140370305585296	47.96873982	11.09053651	6.363961031
id_140370305586896	16.57486825	42.91572095	34.11873684
id_140370305588432	23.08096857	49.1469734	44.34422331
id_140370305589968	62.74153329	12.88409873	17.69180601
id_140370305591504	46.20666419	4.519051438	9.480855324
id_140370305593040	8.774964387	22.8035085	25.01999201
id_140370305594576	65.99074723	14.87698239	10.26295595
id_140370305596112	3.706228108	11.95835709	4.109309487
id_140370305614096	44.50752669	25.4225462	26.69285828
id_140370305615696	18.4261075	10.29059811	4.022581467
id_140370305617232	46.995579	34.21644585	24.27339208
id_140370305618768	52.69724851	47.60252094	47.87483681
id_140370305620304	63.37325675	3.362132616	5.853004527
id_140370305621840	64.58567237	6.390608063	7.238238205
id_140370305623376	60.94259594	25.03996805	15.58845727
id_140370305624976	82.4742384	14.69693846	18.24828759
id_140370305626512	84.83907748	0	5.248993029
id_140370305628048	2.296269514	36.22138849	8.702656948
id_140370305629648	35.40156796	6.213497194	14.18380804
id_140370305664016	87.91541354	4.300583441	2.056254139
id_140370305665552	20.73912811	4.723328661	13.41730542
id_140370305667152	80.96295449	13.92838828	4.949747468
id_140370305668688	90.68933583	14.82352269	6.604993232
id_140370305670224	90.51946189	22.90194906	14.30382427
id_140370305671760	50.12553412	3.425764548	20.36138798
id_140370305673296	60.59774374	55.74834124	28.51633238
id_140370305674832	21.77671127	25.99867498	22.89721911
id_140370305676368	48.55399645	4.655652434	4.267396367
id_140370305677968	51.96457875	20.93524335	21.14707361
id_140370305712336	37.48332963	22.4053565	9.16515139
id_140370305713872	74.97401279	35.53643208	31.16164462
id_140370305715408	11.03730079	10.1400905	19.26728111
id_140370305716944	4.13934711	31.7126252	17.08479647
id_140370305718480	4.358898944	7.348469228	27.16615541
id_140370305720016	7.490050311	22.81755612	4.103853688
id_140370305721616	13.92838828	62.17716623	4.472135955
id_140370305724112	6.608933222	18.97572545	9.247227006
id_140370305724624	12.33055924	37.93555365	7.645255716
id_140370305726160	10.05581315	40.22191741	11.2124522
id_140370305727696	4.123105626	54.89080069	19.4422221
id_140370305745680	38.90639583	23.40572356	31.90641373
id_140370305747216	11.09053651	72.1734023	24.2899156
id_140370305748752	4.754098957	23.30836053	7.071963513
id_140370305750288	9.004319276	36.67703018	21.79415199
id_140370305751824	4.832315076	56.57999307	20.58620355
id_140370305753360	33.80837366	1.446929211	3.217418009
id_140370305754896	18.75279757	11.42458394	11.64323482
id_140370305756432	90.14387592	46.59259384	53.43992264
id_140370305757968	67.39436178	45.54119015	38.27531842
id_140370305760528	79.7684148	43.94314509	50.17967716
id_140370305761040	17.23368794	18	40.91454509
id_140370305828176	3	35.61852043	11.78679332
id_140370305829712	21.79449472	27	47.75981575
id_140370305831248	70.63285355	54.67174773	33.86738844
id_140370305832784	47.85394446	48.49742261	16.97056275
id_140370305834320	24.36941947	40.37507926	35.48374979
id_140370305835856	30.09983389	45.32107677	43.19722213
id_140370305837392	51.28352562	63.29296959	23.21637353
id_140370305838928	13.64618871	73.20667716	20.31150923
id_140370305840464	17.35256026	65.03250746	9.994092157
id_140370305877520	42.43819035	4.242640687	0
id_140370305879056	48.47197111	72.7941242	3.063550028
id_140370305880592	45.87750485	2.58828955	6.51199567
id_140370305882128	28.09698901	40.41728937	9.008537769
id_140370305883664	59.63619464	22.39219148	9.876527831
id_140370305885264	92.68979648	11.55183326	7.000669745
id_140370305886800	37	15.16697716	16.72783556
id_140370305888400	32.80243893	36.24913792	4.472135955
id_140370305890000	68.24954212	29.22327839	7.874007874
id_140370305891536	43.53614909	11.19135129	4.028518277
id_140370305925904	93.43262292	5.6981177	3.845692466
id_140370305927440	74.82872963	6.354796594	18.32570758
id_140370305928976	80.64231134	4.366698493	9.842222017
id_140370305930512	14.91745097	5.500384937	8.019942869
id_140370305932048	35.35533906	21.11871208	20.04993766
id_140370305933648	20.08697761	34.07147679	20.68904029
id_140370305935184	4.041451884	14.75106718	1.154700538
id_140370305936720	36.11540599	7.72970861	15.66870744
id_140370305938256	79.18227249	9.769423862	3.878605669
id_140370305939792	103.1501255	40.97341139	36.42476711
id_140370305941328	47.84349486	3.674234614	18.05547009
id_140370305975696	44.10490134	15.39153583	11.60053692
id_140370305977296	29.48241409	5.160105923	14.07828475
id_140370305978832	8.831581788	48.23489337	2.408147868
id_140370305980432	46.35730795	24.22808288	10.04987562
id_140370305981968	31.1602959	6.259499775	7.740121749
id_140370305983504	89.24847517	4.011693141	17.06434114
id_140370305985040	101.9117265	20.68816087	12.32882801
id_140370305986640	85.81604125	2	5.567285088
id_140370305988240	40.16217126	24.35159132	10.44030651
id_140370305989840	67.02277545	30.26762851	7.380897777
id_140370306056976	28.14621551	1.047352097	2.820316226
id_140370306058512	9.744275319	18.17293467	1.397865184
id_140370306060048	84.64225655	5.214866856	11.76280233
id_140370306061584	5.196152423	3.741657387	4.123105626
id_140370306063120	47.13655636	4.203691494	3.541857248
id_140370306064656	24.44531385	3.225569051	2
id_140370306066192	65.99615531	20.98019777	3.473004684
id_140370306067792	92.47546553	17.17374911	9.496751487
id_140370306069328	68.37742303	25.51337282	26.33138841
id_140370306070864	68.44705983	35.07135583	23.53720459
id_140370306072400	28.21001866	18.82700893	6.268985868
id_140370306106768	6.147772889	6.765230217	5.358676349
id_140370306108304	47.16990566	9.643650761	4.949747468
id_140370306109840	35.8459585	47.22755603	13.79619987
id_140370306111440	52.28313631	29.87609055	8.395525026
id_140370306112976	23.50323255	6.37583214	2.987904901
id_140370306114576	17.60941948	1.756482953	2.389133804
id_140370306116112	36.20304724	33.24645351	2.167399589
id_140370306117648	22.50649672	8.983718331	8.245580409
id_140370306119248	80.05556897	7.541279616	4.364906508
id_140370306120848	45.03441933	13.16344816	5.724657241
id_140370306155280	39.41740078	9.638708727	5.122357704
id_140370306156816	71.66937979	4.618802154	10.24695077
id_140370306158352	72.46372894	3.494738618	6.938852973
id_140370306159888	38.48376281	23.79075451	6
id_140370306161424	50.73073128	23.49020965	21.23184487
id_140370306162960	23.85372088	4.618802154	11.53256259
id_140370306164496	6.08276253	8.485281374	9.848857802
id_140370306166032	35.40896809	6.886129208	3.68618263
id_140370306167568	0	15.52191525	3.404380675
id_140370306169104	26.98147513	5	18.86796226
id_140370306170640	36.06937759	9.16515139	10.44030651
id_140370306205072	66.21178143	32.66496594	27.60434748
id_140370306206608	49	25.96150997	12.24744871
id_140370306208144	62.62716997	8.882476081	3.097981126
id_140370306209680	3.730016896	13.26126498	9.190364295
id_140370306211216	52.79038927	14.1887677	8.205933197
id_140370306212816	34.23564491	13.71689524	5.830636778
id_140370306214416	22.22611077	2.236067977	7.681145748
id_140370306215952	21.9544984	7.615773106	27.38612788
id_140370306217488	22.93468988	5.385164807	4.242640687
id_140370306219024	56.09893132	36.57816591	12.31654606
id_140370306237008	36.41370016	14.34357166	12.29068994
id_140370306238544	14.82147631	4	10.00316971
id_140370306240080	50.03998401	4.123105626	3.535533906
id_140370306241616	66.53856588	36.78328668	18.67069503
id_140370306243216	21.11871208	14.07124728	22.84731932
id_140370306244816	20.64637266	40.51993162	5.119427899
id_140370306246352	42.81414264	15.51849954	0.299279274
id_140370306247952	14.33527119	30.49590136	12.32882801
id_140370306249552	6.164414003	6.782329983	6.32455532
id_140370306251088	6.656667461	5.177693908	12.29596872
id_140370306252624	18.38477631	4.358898944	15.16575089
id_140370306286992	60.09159675	3.741657387	12.72792206
id_140370306288528	24.15241747	1.006282897	2.121320344
id_140370306290064	48.70318265	33.83784863	19.84943324
id_140370306291600	13.37435101	3.322705461	10.42984008
id_140370306293136	26.89497817	20.0548049	10.12983832
id_140370306294672	45.69413918	28.07114026	3.360160967
id_140370306296208	1.743124932	10.65907017	6.545006744
id_140370306297808	62.00531334	23.33452378	22.20557255
id_140370306299344	38.39260068	11.13145668	10.20844399
id_140370306300944	14.59659153	11.00423792	25.68173026
id_140370306351696	84.02937311	7.776810576	21.77708037
id_140370306353232	14.91383012	2.724764928	5.490578778
id_140370306354832	50.21490756	5.656854249	2.587930019
id_140370306356432	6.534144031	7.1693128	4.339174252
id_140370306358032	59.20304046	44.64302857	12.72792206
id_140370306359568	29.47880595	6.164414003	6.708203932
id_140370306361104	24.49151363	6.128232502	5.083130013
id_140370306362640	68.39801687	8	6.057222515
id_140370306364176	99.2068546	63.28506933	14.07124728
id_140370306365712	31.88013546	3.746528835	11.65486953
id_140370306367248	84.07236201	9.503410852	3.553465497
id_140370306418000	11.96750923	8.65276685	6.020772173
id_140370306419536	35.35533906	28.44292531	4
id_140370306421072	92.78469701	14.73091986	27.73084925
id_140370306422608	7.806283599	3.171193938	10.5419976
id_140370306424144	9.596498512	10.96343263	12.03223893
id_140370306425744	62.01216319	27.10156956	20.34151114
id_140370306427280	8.033414126	0.27770422	2.352037401
id_140370306428816	50.86391746	5.296855532	2.121320344
id_140370306430416	51.48786265	6.403124237	10.67707825
id_140370306431888	24.91987159	9.38083152	4.949747468
id_140370306466320	9.273618495	13.85640646	19.13112647
id_140370306467856	45.36154779	6.274490946	29.49561652
id_140370306469456	56.20655042	6.167252496	11.51540567
id_140370306470992	40.90423386	2.451480757	4.926868541
id_140370306472528	29.61987462	9.216928938	11.96111941
id_140370306474064	56.81562288	18.29522792	29.47088358
id_140370306475600	13.92838828	30.28200786	0
id_140370306477136	8.077037644	13.59588747	21.63231289
id_140370306478672	19.88075697	7.504729153	5.212789611
id_140370306480208	7.216158706	3.577489918	15.61702158
id_140370306481744	8.774964387	20.32240143	11.18033989
id_140370306499728	38.89542428	21.08964045	5.88451086
id_140370306501328	75.61084578	9	8.062257748
id_140370306502864	31.58918473	1.756879651	8.07907655
id_140370306504464	15.66959016	3.780827173	3.678938071
id_140370306506064	28.73560649	5.845231322	2.168847296
id_140370306507600	63.43011082	35.86328486	4.242640687
id_140370306509136	21.82639235	14.30782255	8.455041293
id_140370306510672	4.96343376	23.133866	19.33593337
id_140370306512208	39.03844259	16.88194302	11.70469991
id_140370306513744	14.07124728	6.92820323	22.36067977
id_140370306548112	67.4594406	3.851895723	27.15532436
id_140370306549648	31.52290369	10.6048248	11.4284739
id_140370306551184	4.242640687	24.10394159	10.63014581
id_140370306552720	58.42088668	8.485281374	29.9833287
id_140370306554320	43.37105037	3.512910592	10.72844788
id_140370306555920	30.0732566	4.191854237	11.4533752
id_140370306557520	58.19381044	6.143587219	26.36709218
id_140370306559120	58.62593283	6.403124237	13.96424004
id_140370306560656	38.44654943	13.74798875	8.239642887
id_140370306562256	53.05953175	2.925858052	0.416551771
id_140370306563856	60.9672043	3.16227766	5.385164807
id_140370306614608	42.93017587	18.02775638	4.582575695
id_140370306616144	2.601703392	9.830633835	5.702268773
id_140370306617680	79.17270769	16.85239265	13.80744702
id_140370306619216	30.6757233	9.219544457	5.049752469
id_140370306620752	14.14213562	6	18.46618531
id_140370306622288	17.66700071	10.06901463	5.34131014
id_140370306623888	29.69848481	9.589911029	10.23459648
id_140370306625424	71.54027776	12.68398765	19.39195824
id_140370306627024	28.89745078	7.127134141	5.305985392
id_140370306628496	45.45327271	18.92088793	6.557438524
id_140370306662864	77.25494895	2.56388595	5.335508801
id_140370306664400	90.84267236	19.2965528	2.161178986
id_140370306665936	17.1464282	32.15587038	6.363961031
id_140370306667472	49.35279121	12.94168198	18.70767477
id_140370306669008	59.77457654	22.89104628	16.58312395
id_140370306670544	44.21219889	3.940086952	4.624973125
id_140370306672080	42.29521161	24.28013176	11.53109315
id_140370306673616	32.61901286	3.16227766	20.32240143
id_140370306675152	18.89165057	8.811681521	17.47081628
id_140370306676688	88.04552101	3.385317877	3.003596164
id_140370306678224	24.8260883	9.049562245	2.566220073
id_140370306696208	35.19516739	10.8169483	9.576651291
id_140370306697744	29.33428029	9.486832981	5.431390246
id_140370306699344	17.71456698	10.02233659	1.788704586
id_140370306700880	44.79681314	3.525707153	10.7105261
id_140370306702416	40.84115571	9.16515139	5.830951895
id_140370306703952	94.33451118	16.29417074	10.63014581
id_140370306705488	61.53330877	3.354031494	13.16602809
id_140370306707024	37.85032505	2.853917897	11.60775204
id_140370306708624	55.77059094	79.19701365	1.403245672
id_140370306710224	23.72486868	27.66959129	20.2493061
id_140370306728272	12.03347008	6.599242236	4.121662663
id_140370306729808	17.4218242	3.380385781	1.75788195
id_140370306731344	52.09606511	6.442049363	12.24744871
id_140370306732880	57.01754116	20.85665361	9.949874371
id_140370306734416	57.6756941	5.898422005	0.687606798
id_140370306736016	10.31044419	0	7.518615844
id_140370306737552	29.05167809	31.28897569	13.92838828
id_140370306739088	53.00943312	15.8113883	5.656854249
id_140370306740688	47.38143096	13.74772708	10.48808848
id_140370306742224	17.32050808	15.74801575	3
id_140370306743760	35.74912586	33.67491648	27.22131518
id_140370306827280	7.211102551	9	10.77032961
id_140370306828816	39.13755764	32.14094788	20.34539384
id_140370306830352	19.34296209	21.56869441	22.5124891
id_140370306831888	46.9446004	11.62689005	20.52169638
id_140370306833424	15.55820286	28.56092819	6.054490387
id_140370306834960	4.123105626	1.414213562	9.539392014
id_140370306836496	11.50623798	6.498528083	3.18991793
id_140370306838032	26.42360872	34.66973858	13.15108871
id_140370306839568	38.14000341	3.257305286	3.002543311
id_140370306841104	2.563854266	9.914311687	5.326832622
id_140370306859088	23.4520788	25.07987241	30.14962686
id_140370306860624	106.5025212	27.32232979	8.968842639
id_140370306862160	27.98551944	3.473499323	3.005884152
id_140370306863696	19.49965916	50.90755847	31.41435712
id_140370306865296	81.28970118	5.872621915	13.24618783
id_140370306866832	43.13694689	30.64723853	21.27495906
id_140370306868368	61.52235366	33.9411255	19.94993734
id_140370306869904	33.346664	20	26.83281573
id_140370306871440	10.67707825	6.964194139	6.041522987
id_140370306872976	65.44652128	19.41994765	5.220599576
id_140370306874512	28.29016319	8	10.78751694
id_140370306924944	15.91664307	26.61822155	45.4541833
id_140370306926480	53.46183305	20.15507124	17.74990047
id_140370306928080	57.98275606	19.20937271	11.40175425
id_140370306929616	58.15496539	33.61547263	14.45683229
id_140370306931152	5.036049641	46.10707082	45.89128505
id_140370306932752	43.21065486	19.05418341	41.39261779
id_140370306934288	15.13274595	36.55133376	38.27531842
id_140370306935888	32.75667871	44.32268042	16.24807681
id_140370306937424	45.7807381	22.3919049	25.11448702
id_140370306939024	15.58845727	12.70826503	15.42724862
id_140370306940560	48.91959942	8.001518177	8.640555141
id_140370306991312	18.65510745	2.953073386	27.23373229
id_140370306992912	1.47451383	42.38280003	46.67097673
id_140370306994512	18.22876833	8.134804811	17.40134884
id_140370306996048	2.121320344	20.32240143	26.28687886
id_140370306997584	56.75385449	52.64028875	45.12205669
id_140370306999120	23.67804174	2.7084901	15.15192541
id_140370307000656	77.05032862	39.64594945	46.12259932
id_140370307002192	24.29880745	11.35530624	2.796906775
id_140370307003728	61.97580173	4.898979486	12.24744871
id_140370307005264	12.12435565	16.24807681	25.47547841
id_140370307056016	18.78829423	20.04993766	19.4422221
id_140370307057552	3.431260964	4.746743349	5.658019252
id_140370307059088	46.63242486	24.84125678	25.91366892
id_140370307060688	0.577350269	39.6484552	42.29657197
id_140370307062224	5.292901307	3.627829022	17.41966422
id_140370307063760	27.94416732	8.894241914	1.143524701
id_140370307065296	41.30375286	87.16650733	11.44552314
id_140370307066896	18.49324201	12.88409873	15.03329638
id_140370307068496	16.88194302	4.062019202	14.69693846
id_140370307070032	41.01197782	12.72286465	7.105615829
id_140370307071568	216.0897902	17.04218628	12.07840984
id_140370307089616	74.35550837	25.13631634	39.47202503
id_140370307091152	164.1564122	7.490055543	5.223062079
id_140370307092752	6.542069184	40.70336669	26.60904367
id_140370307094352	55.4616985	20.63976744	18.38477631
id_140370307095888	21.93698775	1.911534414	15.9879658
id_140370307097424	41.74639943	10.14074733	1.856475247
id_140370307098960	20	2	2.000100729
id_140370307100496	44.07678651	11.82625661	9.007758184
id_140370307102032	91.06072452	34.5286711	18.58320954
id_140370307103568	221.4091236	21	25.48528987
id_140370307137936	51.3955251	27.66767066	30.43024811
id_140370307139472	14.05161908	4.571841267	9.988676259
id_140370307141072	8.298815199	10.90575517	2.422798397
id_140370307142672	20.51828453	38.28837944	34.7706773
id_140370307144272	177.7245059	13	9.695359715
id_140370307145872	48.07327555	19.62628367	11.75386987
id_140370307147472	65.03226131	31.57671579	24.85850865
id_140370307149008	60.86872024	32.81839247	9.805581656
id_140370307150608	0	31.6093622	28.12685187
id_140370307152208	17.60788326	7	4.219556151
id_140370307153808	175.0028571	14.56021978	8.602325267
id_140370307204624	22.89054787	0.650338572	3.937362931
id_140370307206160	99.58069329	24.53815745	16.63236566
id_140370307207696	41.37601222	7.109205872	12.15551399
id_140370307209296	50.03998401	6.32455532	5.196152423
id_140370307210896	43.60045871	20.82066281	10.24695077
id_140370307212496	74.10128204	19.01315334	11.5758369
id_140370307213968	42.05948169	21.3541565	35.22782991
id_140370307215504	131.0343466	7.348469228	6.557438524
id_140370307217040	5.157218601	4.966724755	6.782170631
id_140370307218640	47.57337816	30.16008424	20.01195973
id_140370307236624	39.7114593	27.91057147	20.63976744
id_140370307238224	79.71774322	3.782526724	4.949747468
id_140370307239760	108.2497113	0.707106781	6.708203932
id_140370307241360	91.35924655	50.76035747	9.060944508
id_140370307242960	25.41211028	3.464101615	4.321798712
id_140370307244560	20.33469941	13.19090596	3
id_140370307246160	131.8483978	56.35601121	46.28174586
id_140370307247760	72.48626829	3.033829573	1.717395984
id_140370307249296	73.57825287	48.6387998	16.20759111
id_140370307250896	60.45153	3	19.42234118
id_140370307285328	24.92247067	5.781333586	2.011326609
id_140370307286864	81.16192826	51.25901907	41.9698786
id_140370307288400	129.6341005	46.40043103	10.46422477
id_140370307290000	5.099019514	11.5758369	6.164414003
id_140370307291536	57.50211026	5	2.816991834
id_140370307293136	97.74456507	16.91153453	25.70992026
id_140370307294672	52.39274759	15.03329638	28.08914381
id_140370307296208	25.91867215	6.544077187	8
id_140370307297744	39.11521443	15.13274595	23.42007686
id_140370307299344	5.029677651	17.69913245	13.45749053
id_140370307300944	30.09983389	11.3137085	16.0623784
id_140370307368144	58.1893461	5.656854249	18.49324201
id_140370307369744	3	4.618802154	0
id_140370307371344	89.77317826	12.46090949	13.55497632
id_140370307372944	4.000935048	3.464101615	3.653508251
id_140370307374480	40.66866254	1.311565295	16.83609185
id_140370307376080	5.947524978	19.82834783	5.224721646
id_140370307377680	31.40063694	30.62678566	10.81665383
id_140370307379280	120.8072213	55.28770411	26.71888054
id_140370307380880	95.30280238	8.23665575	16.07051725
id_140370307382416	54.4885309	6.363961031	5.196152423
id_140370307416848	121.0537071	34.89985673	10.04987562
id_140370307418448	18.52624448	18.0610159	9.079679869
id_140370307419984	30.08508589	2.828722849	6.531373681
id_140370307421584	9.486832981	33.1662479	22.04540769
id_140370307423184	115.7108465	33.9705755	44.91102315
id_140370307424720	50.46781152	12.12435565	14.14213562
id_140370307426320	52.50714237	8	22.64950331
id_140370307427856	25.66991155	2.828427125	3.072234657
id_140370307429392	38.94868419	4.69041576	7.810249676
id_140370307430928	33.86658791	0.873598865	12.76350289
id_140370307448976	82.4738379	25.03612236	21.97977984
id_140370307450512	51.50728104	23.67136104	27.31300057
id_140370307452048	86.62271989	31.79250597	18.55510596
id_140370307453584	37.83973174	2.201145534	4.70607922
id_140370307455184	0	21.71634643	8.870664655
id_140370307456720	84.66699475	19.5192213	8.062257748
id_140370307458320	115.4229962	2.965403992	13.02851248
id_140370307460816	1.732050808	2.828427125	7.505553499
id_140370307461328	13.67718357	2.646808225	2.309401077
id_140370307462864	81.15417426	13.27905619	29.68164416
id_140370307464400	69.11584478	2.886751346	0
id_140370307498768	18.20277933	31.80571029	15.09277595
id_140370307500304	55.33751272	21.48663955	13.86629207
id_140370307501840	60.44989349	6.690072553	2.310156341
id_140370307503440	75.92759709	28.7923601	22.15851981
id_140370307505040	87.36131867	6.708203932	5
id_140370307506640	95.43243537	98.42213119	27.03151053
id_140370307508240	7.301760719	0.551601958	2.121774256
id_140370307509840	94.005319	36.45545227	22.71563338
id_140370307511440	3.250799203	8.985077978	6.369316458
id_140370307512976	27.91298415	5.617074842	10.16652655
id_140370307547344	14.62873884	8.124038405	13.67479433
id_140370307548944	58.53239034	3.822456216	2.460488479
id_140370307550480	19.81635385	3.511053461	9.146774318
id_140370307552080	61.7967462	0	6.092912553
id_140370307553680	24.04837064	5.879525941	4.382357513
id_140370307555216	134.1678054	23.15167381	5.049752469
id_140370307556816	3.470109502	5.433298681	9.874523097
id_140370307558352	4	0	7.725348954
id_140370307559888	37.33630941	53.27288241	36.15245497
id_140370307561424	25	1.076179956	2.84E-14
id_140370307563024	119.5604815	17.32050808	2.454890047
id_140370307597456	42.85841952	24.36514897	12.50735149
id_140370307599056	102.5845422	8.438666134	7.264092358
id_140370307600656	55.65069631	16.01561738	14.45683229
id_140370307602256	28.07363355	4.990160311	2.940128891
id_140370307603856	15.07659478	12.03249175	4.19889495
id_140370307605392	75.76938696	3.741657387	4.041451884
id_140370307606992	111.086156	4.334551682	5.031118287
id_140370307608592	33.79866566	8.932276989	6.429380637
id_140370307610192	66.44017357	46.31193203	53.98471976
id_140370307611728	60.80296045	5.049752469	13.78404875
id_140370307646096	78.95568377	40.41658076	36.59234893
id_140370307647696	51.32620179	2.029311228	7.424797971
id_140370307649296	2.828427125	14.2126704	11.35781669
id_140370307650896	131.91285	25.009998	28.75760769
id_140370307652432	42.46174749	11.3137085	11.5758369
id_140370307654032	63.91755415	13.78623959	0.383055035
id_140370307655568	29.24979581	11.98024039	4.960331262
id_140370307657104	22.64950331	22.11334439	21.65640783
id_140370307658704	62.4899992	56.96490147	65.520989
id_140370307660240	11.16714443	1.443967992	2.451695535
id_140370307711056	7.313960175	7.138914705	9.864799688
id_140370307712592	39.44207463	13.97480243	30.46761119
id_140370307714128	66.71581522	3.31662479	24.43358345
id_140370307715728	11.35350579	3.411915372	2.351037169
id_140370307717264	17.34576204	29.57994796	14.54494435
id_140370307718864	36.82390528	20.09975124	21.40093456
id_140370307720464	11	12.12435565	10.24695077
id_140370307722960	12.29661854	9.978452241	5.231791388
id_140370307723472	116.8250945	9.527850973	10.78028248
id_140370307725008	96.16555264	5.697728063	5.853876616
id_140370307726544	22.54991708	3	14.59300657
id_140370307777296	68.70953355	6.92820323	14.4222051
id_140370307778832	83.79909399	25.94263942	12.62263553
id_140370307780432	134.3449356	7.523712192	9.649800537
id_140370307781968	51.68747193	9.012254816	12.79852897
id_140370307783504	65.36818798	46.1356695	43.17406629
id_140370307785040	33.3389151	11.11688911	4.024922457
id_140370307786640	36.19392214	5.477225575	7
id_140370307788176	32.64804701	9.208138165	5.203557136
id_140370307789712	0.39972339	17.53524963	4.660307914
id_140370307791312	55.27686917	98.56335566	18.72024284
id_140370307792848	40.25417713	19.14433325	9.998804162
id_140370307827280	30.57005894	13.36849505	6.670307338
id_140370307828880	29.20883303	82.31097826	21.01931134
id_140370307830480	28.49197802	5.872797812	9.931961366
id_140370307832080	3.764886376	6.909813356	6.870873082
id_140370307833680	19.55420692	6.419790891	11.46877562
id_140370307835280	89.20762299	6.350852961	2.828427125
id_140370307836880	113.0737471	0.875504135	2.530037086
id_140370307838480	33.18132005	11.44552314	1.414213562
id_140370307840080	66.93816633	36	8.630083812
id_140370307841680	58.82209116	14.70239265	6.453861882
id_140370307859728	4.772634339	8.786676225	9.847407353
id_140370307861328	53.70487022	13.23060556	2.558067563
id_140370307862928	95.54580054	10.77032961	15.8113883
id_140370307864528	46.17358552	4.582575695	3.16227766
id_140370307866064	70.00357134	30.03331484	27.94637722
id_140370307867600	9.61412445	45.40033262	40.49227305
id_140370307869136	103.2656065	10.46357408	6.889063783
id_140370307870672	52.44044241	31.591138	17
id_140370307872272	51.63332257	2.886751346	9.486832981
id_140370307873808	92.49148739	15.99962227	15.94238822
id_140370307908176	31.55307232	10.28023193	3.874572937
id_140370307909776	36.71027257	0	1.340371818
id_140370307911376	11.3137085	17.12951157	15.67960966
id_140370307912976	14.86606875	14.24780685	4.69041576
id_140370307914576	53.63767333	15.5241747	9.38083152
id_140370307916112	83.86894539	24.69817807	16.88194302
id_140370307917648	110.2787272	22.81631137	6.076587958
id_140370307919248	70.17834424	13.47219359	24.04163056
id_140370307920784	57.45050813	10.03118616	16.5601084
id_140370307922320	44.12105444	26.06309313	30.87842596
id_140370307923920	53.47729908	20.23487232	4.371953944
id_140370307990992	134.5362405	201.7647145	89.37001734
id_140370307992592	170.1078865	12.59505958	18
id_140370307994192	178.3704227	43.04346606	38.3112282
id_140370307995792	39.1856076	71.15068064	43.63072457
id_140370307997392	39.00119587	70.07099252	26.93446264
id_140370307998992	141.8273598	86.03487665	6.32455532
id_140370308000592	144.1018833	49.13196226	38.71918213
id_140370308002128	217.7075676	137.7333108	33.23915504
id_140370308003728	143.5221548	55.71858095	40.46639949
id_140370308005328	130.6483831	50.25932749	28.58321186
id_140370308056144	201.4199593	144.5302736	92.24424101
id_140370308057680	153.1992167	66.633325	10.81665383
id_140370308059216	206.6301043	183.7253385	34.66987165
id_140370308060816	194.2243725	177.5960036	39.41916087
id_140370308062416	85.22351271	165.4872537	43.92330617
id_140370308064016	189.1903803	179.2651667	46.18441296
id_140370308066576	125.1520732	57.83905774	25.96443529
id_140370308067088	140.6556078	65.03845017	45.22167622
id_140370308068688	126.0575362	77.64182893	2.963719698
id_140370308070224	193.339452	140.4454409	56.76975373
id_140370308121040	187.3225976	147.1249336	18.41127946
id_140370308122640	46.76858283	67.2424523	9.559826223
id_140370308124240	185.7013732	169.7085737	41.15823125
id_140370308125840	172.5199186	170.4492416	44.97777894
id_140370308127440	182.9873765	142.9979524	53.5074747
id_140370308129040	111.7805133	46.6434996	12.53363619
id_140370308130640	82.78904229	105.2309727	45.19851064
id_140370308132240	109.2874352	29.3212673	26.52505507
id_140370308133840	141.7815221	18.27566688	32.54228019
id_140370308135440	63.84080721	100.2729042	36.56901801
id_140370308153488	170.1205455	29.00861941	9.273618495
id_140370308155088	134.7937074	140.9944838	32.57219264
id_140370308156624	99.48789054	33.29655366	14.24475313
id_140370308158224	169.2145478	149.9691227	58.05898062
id_140370308159824	96.70073181	18.51355597	19.02358543
id_140370308161424	66.34330681	80.48114506	3.177019033
id_140370308163024	169.7132222	14.78073895	45.07446529
id_140370308164624	138.8233526	104.2224198	80.90088632
id_140370308166224	172.687888	92.7234782	74.30529732
id_140370308167824	157.6711147	17.60432804	44.50361268
id_140370308169424	71.3456981	22.05021862	16.35584245
id_140370308187472	98.35649445	18.70828693	16.97056275
id_140370308189072	158.4931891	0	24.29937457
id_140370308190672	152.6686216	87.50104127	63.87395541
id_140370308192272	79.05785267	6.477269727	4.584013806
id_140370308193872	152.2684531	148.251033	13.65755205
id_140370308195408	71.28708009	115.3437507	34.01643605
id_140370308197008	159.5468882	25.84506138	13.40533705
id_140370308198608	71.68472921	21.8167001	30.6789151
id_140370308200144	146.8100338	75.71427882	51.11923516
id_140370308201744	161.8732972	20.52333805	46.81588065
id_140370308236176	183.2102617	72.97944916	56.17828762
id_140370308237776	74.66007903	40.26326396	18.60434779
id_140370308239376	89.98348906	89.85986155	22.68205422
id_140370308240912	93.34878259	114.8179127	29.58973794
id_140370308242512	54.51698656	17.42248304	16.47849128
id_140370308244112	75.45315886	53.84368927	3.455887713
id_140370308245712	163.260528	75.32595834	53.12249994
id_140370308247312	122.8596552	98.33709835	61.30697342
id_140370308248912	146.7785451	7.505553499	29.37884058
id_140370308250512	51.52219191	108.8869251	43.41238682
id_140370308301264	49.07339617	58.48602585	12.67973425
id_140370308302800	137.5751317	57.62360955	17.32061205
id_140370308304336	118.1713571	106.0709607	0.577350269
id_140370308305936	154.6738504	102.1861047	77.31106001
id_140370308307536	104.5943834	120.4246531	16.94892399
id_140370308309136	174.6650582	48.14746301	39.88584741
id_140370308310672	67.84541252	24.22808288	4.062019202
id_140370308312272	86.95401083	72.22880312	36.74234614
id_140370308313872	146.1574493	71.67984375	50.53711507
id_140370308315472	89.08833783	88.1183823	34
id_140370308317072	66	19.54482029	4.582575695
id_140370308335056	145.5300656	53.76802024	28.10693865
id_140370308336656	128.2263623	87.21238444	64.89221833
id_140370308338192	119.065594	85.39735745	64.92864831
id_140370308339792	135.7923211	41.32620117	16.1345374
id_140370308341392	76.19519923	39.62411616	5.43535016
id_140370308342992	147.6888621	126.2259878	86.27861844
id_140370308345552	105.399241	94.20191081	42.68489194
id_140370308346064	116.512161	105.4235771	6.626357273
id_140370308347600	66.09841148	83.86894539	58.55766389
id_140370308349200	85.64767671	100.4917282	28.05629311
id_140370308399952	160.792233	43.19869787	22.16530334
id_140370308401552	125.3515058	106.400188	62.59392942
id_140370308403152	115.9525765	81.2034482	47.05316142
id_140370308404752	102.3291918	75.81354791	37.54435899
id_140370308406288	80.458565	112.0861013	34.13755221
id_140370308407888	157.0261729	38.52235371	33.39056768
id_140370308409488	145.4879482	75.53058148	59.72285704
id_140370308411024	139.78016	48.55403538	33.47993267
id_140370308412624	147.732867	117.6647781	78.24960064
id_140370308414224	39.85298012	38.0820164	18.11415384
id_140370308465040	126.4001582	74.47818473	7
id_140370308466640	71.21538083	45.57260237	9.457470293
id_140370308468176	99.34262403	52.65915489	11.61404908
id_140370308469712	124.7530834	41.62049239	9.971455547
id_140370308471312	128.3029767	79.57722047	59.90441215
id_140370308472848	96.36389365	53.07070755	23.02172887
id_140370308474448	127.5888278	62.95174136	36.77546568
id_140370308476048	45.3431362	58.1893461	20.33469941
id_140370308477648	158.9189105	25.09840982	10.53186904
id_140370308479184	70.44681928	28.53647882	5.810727887
id_140370308480784	125.177645	49.46904076	5.992255742
id_140370308515216	63.53739057	75.96051606	8.062257748
id_140370308516816	56.59505279	36.5650106	6.782329983
id_140370308518352	21.11871208	57.80138407	6.782329983
id_140370308519888	140.6269704	8.320117617	3.069634701
id_140370308521424	5.338539126	56.97367813	9.643650761
id_140370308523024	156.5375354	113.0575075	94.47751055
id_140370308524624	129.7474658	37.79433659	10.92262612
id_140370308526224	65.73431372	69.53416426	40.26164428
id_140370308527824	116.9358799	91.53141537	57.72347876
id_140370308529360	94.81561053	93.30594836	19.4422221
id_140370308563792	127.8045383	19.4422221	7
id_140370308565328	36.78011762	6.138255701	15.84343583
id_140370308566928	102.6752533	0	4.915068149
id_140370308568528	145.9740292	48.95910386	29.07183889
id_140370308570128	79.98749902	83.48053665	37.10795063
id_140370308571664	138.2517494	42.53287369	38.78533387
id_140370308573200	141.0411204	13.57337158	14.65894827
id_140370308574736	120.4685109	12.64580953	3.538964785
id_140370308576272	103.5241118	58.59685612	64.23825924
id_140370308577872	149.5359489	29.74894956	31.08054054
id_140370308595856	49.51647306	62.82979756	26.72115171
id_140370308597456	161.1404896	47.24028241	41.7736609
id_140370308598992	125.9021515	22.51703701	8.096457087
id_140370308600592	86.19017994	74.51978264	65.30975988
id_140370308602128	12.02081528	50.75560099	2.402568325
id_140370308603728	84.37725378	39.70452974	5.818210554
id_140370308605328	88.16086395	26.58080282	2.050219314
id_140370308606928	92.52567211	57.41950888	75.72318007
id_140370308608528	99.20054666	37.62686555	4.456688366
id_140370308610128	141.483322	12.88228888	3.913532765
id_140370308611728	148.9317458	33.41741093	26.00123682
id_140370308662544	87.13796202	33.68760709	13.50745826
id_140370308664144	96.23743351	32.4540639	16.49677872
id_140370308665680	122.4132346	57.02630972	16.24807681
id_140370308667216	5	66.28725368	27.29468813
id_140370308668752	125.3554945	61.74949393	14.43375673
id_140370308670288	4.199275578	88.67361381	8.419600454
id_140370308671888	109.141663	19.10430737	10.65320596
id_140370308673488	121.4888159	18.0509934	10.24343833
id_140370308675088	109.2819952	4.330947821	4.091116448
id_140370308676624	70.35766001	55.10235944	19.91589145
id_140370308710992	24.60805521	103.4723718	26.66847008
id_140370308712592	86.19164693	58.89821729	3
id_140370308714192	33.3791213	45.90797559	48.71753555
id_140370308715792	95.5610499	37.29453472	21.3111196
id_140370308717392	136.636797	3.278632771	6.80633929
id_140370308718928	82.15229759	118.0381294	26.92582404
id_140370308720464	97.28823156	55.80322571	15
id_140370308722000	94.43516294	125.8650071	31.67017524
id_140370308723600	6.403124237	89.13753418	17.94435844
id_140370308725200	87.78382539	40.41451884	41.2371192
id_140370308759632	70.2414928	115.5468519	11.11135203
id_140370308761232	123.4746938	8.660254038	5.830951895
id_140370308762832	11.02012239	84.19904591	11.70873168
id_140370308764368	18.81488772	51.32250968	31.44041984
id_140370308765904	4.541032548	9.850320806	5.618593039
id_140370308767504	58.55766389	108.4711943	26.90724809
id_140370308769040	59.14474452	53.14134203	12.32692201
id_140370308770640	93	35.93048845	34
id_140370308772176	15.00679902	34.53186552	31.39696302
id_140370308773712	60.67124525	112.0803283	31.32091953
id_140370308775312	66.76298394	3.98779706	5.542851166
id_140370308809744	49.29503018	0.577350269	16.26345597
id_140370308811344	37.13374955	1.969448488	3.410195438
id_140370308812880	66.61080993	8.544003745	25.01999201
id_140370308814416	40.53979637	117.1298396	7.206654526
id_140370308816016	8.83039035	50.23049086	44.15695679
id_140370308818640	70.9436396	90.91204541	45.17742799
id_140370308819152	92.57429449	88.32893071	32.58834147
id_140370308820752	94.10205048	48.04104838	13.06523918
id_140370308822288	46.27094121	31.46426545	24.36185543
id_140370308823888	103.8235638	42.24456839	42.49902018
id_140370308874640	15.93737745	13.67479433	6.403124237
id_140370308876240	81.5747852	61.1875375	40.5503966
id_140370308877840	75.6439026	31.79622619	52.12485012
id_140370308879440	60.40615066	68.81772328	61.84032694
id_140370308881040	50.83237061	72.83883795	43.0311561
id_140370308882640	128.4298535	41.70720952	30.73426857
id_140370308884176	71.36525765	74.24957912	65.49045732
id_140370308885776	10.48890742	13.24454091	5.185729746
id_140370308887376	14.56577731	82.26616582	13.63092768
id_140370308888976	68.10171199	61.86371085	51.75302233
id_140370308890576	105.4656342	61.03277808	11.18033989
id_140370308925008	35.77708764	0	19.5192213
id_140370308926608	63.74579827	1.457937742	14.91238567
id_140370308928208	49.12229636	8.082903769	5
id_140370308929744	120.4117934	58.62593283	47.69696007
id_140370308931280	32.60880319	6.941907858	14.49355851
id_140370308932880	61.97580173	6.403124237	4
id_140370308935376	42.43239643	15.10336868	13.02092297
id_140370308935888	76.32168761	23.60084744	42.43819035
id_140370308937424	50.35871325	5.431390246	4.358898944
id_140370308938960	49.04437842	19.16107687	49.50017295
id_140370308973392	9.949874371	74.69270379	17
id_140370308974992	25.55493126	25.41039865	33.8826
id_140370308976592	60.20679546	11.54700538	8.24870153
id_140370308978192	106.4690866	14.15661705	12.83857834
id_140370308979792	41.92556866	2.371950235	14.62775908
id_140370308981328	5.700877125	26.2488095	10.72380529
id_140370308982928	51.20702452	33.97980506	49.05610533
id_140370308984528	61.08191222	2	8.306623863
id_140370308986128	3.990306526	55.65939694	49.83816783
id_140370308987664	46.95694265	4.652390687	13.76145677
id_140370309863120	91.21387602	124.0093638	59.94913543
id_140370309863376	75.30712139	127.7195254	59.47309016
id_140370309865040	135.3218386	145.0586088	6.782329983
id_140370309866640	27.81584929	129.0602687	73.544377
id_140370309868240	46.98930919	131.4558161	67.60470705
id_140370309869776	224.9733318	4.062019202	34.38022688
id_140370309871248	128.8378891	151.4435605	1.827209161
id_140370309871440	185.5816425	15.13321528	24.28314507
id_140370309873040	49.36598019	84.48668534	7.483314774
id_140370309907472	189.9505993	12.02081528	21.20981585
id_140370309910608	214.100802	155.5817818	4.713357132
id_140370309912208	155.3199701	189.0181282	12.4210661
id_140370309913808	123.2268291	26.77826999	26.22827702
id_140370309915408	191.2543182	21.94515693	21.43574336
id_140370309917008	175.9431726	4.582575695	12.66885946
id_140370309918544	215.4286995	146.9848834	1.642978433
id_140370309920144	201.2982861	56.05354583	28.74021573
id_140370309921744	199.6496932	10.04987562	11.22497216
id_140370309972496	132.858745	38.89087297	33.01026254
id_140370309974032	92.67709427	26.25393338	21.58834811
id_140370309975632	207.2335756	24.95917748	35.84015225
id_140370309977232	194.3656348	37.86819246	35.34119409
id_140370309978832	200.9452662	83.70185183	75.38567503
id_140370309980432	142.87757	102.1763182	29.49576241
id_140370309982224	160.9153747	117.4755571	16.08915994
id_140370309983760	119.760535	40.09350157	26.1928221
id_140370309985360	203.4698995	40.42276586	48.47679857
id_140370309986960	164.8605471	92.24966125	16.76305461
id_140370310021392	145.6093514	57.86945256	37.8581132
id_140370310022992	189.7086123	66.37708928	36.9593999
id_140370310024592	124.4232509	38.84531374	48.15276709
id_140370310026192	199.8416678	169.5566845	80.27167551
id_140370310027792	209.6789727	156.7852535	2.143554877
id_140370310029392	212.5793969	176.6069081	101.5972441
id_140370310030992	210.779899	138.9003792	3.460427033
id_140370310032528	29.624897	80.76066821	30.57777359
id_140370310034128	168.5022255	19.33907961	21.40093456
id_140370310035728	125.7820506	177.4923305	81.39384491
id_140370310037328	193.7587152	153.8161888	89.9715544

## Sheet: S_table
Ca. Syntrophilus obsequens distance matrix
cell_id	StoC	StoT	StoB
id_139886662533264	11.02011426	3.210846107	2.236169927
id_139886662534800	33.82930807	17.79577589	0.439101491
id_139886662536336	10.91053971	11.57875819	2.035306766
id_139886662537872	4.438419044	31.3282016	2.928303624
id_139886662539408	25.58185845	4.250470146	2.828427125
id_139886662540944	13.36804486	41.57734346	4.969912657
id_139886662542544	46.30272286	2.814628146	2.000025186
id_139886662544016	17.13382156	13.63810018	1.540995866
id_139886662545552	55.9202727	20.83138692	3.464101615
id_139886662547088	24.77646147	12.00475532	1.899912173
id_139886662548688	5.306260039	33.7917489	0
id_139886662599504	51.60794291	15.6537018	0
id_139886662601040	31.99420043	22.20943152	0.841134165
id_139886662602576	48.19160035	54.91728711	7.599024019
id_139886662604176	53.98930918	4.949747468	2.28290988
id_139886662605776	37.05857734	29.83977269	1.905301425
id_139886662607312	16.9325718	51.17574417	0.160048838
id_139886662608912	7.079343929	5.003492934	3.535533906
id_139886662610512	3.337034027	30.73343208	3.169855815
id_139886662612048	38.23049817	2.951518834	2.40949149
id_139886662613584	36.92696695	34.84203408	2.588631334
id_139886662664336	56.51237374	15.52423039	1.437805491
id_139886662665872	51.84041275	24.04476515	2.507956352
id_139886662667408	12.7786872	7.152898677	1.448967952
id_139886662668944	56.93298742	20.84180719	0
id_139886662670480	13.73132018	22.91606322	3.095530881
id_139886662672016	66.60622517	21.74810858	2.309401077
id_139886662673616	61.15252866	14.55236168	3.02543215
id_139886662675088	22.75268226	12.70922631	2.557082035
id_139886662676624	47.32432331	3.734605225	2.038578266
id_139886662678160	14.17544279	51.81116975	3.074339892
id_139886662679696	5.229163047	69.21514517	2.494334168
id_139886662730448	26.92111662	3.535533906	2.018230418
id_139886662732048	57.58335843	8.840309832	4.520517386
id_139886662733584	36.30467591	21.35721653	2.562939745
id_139886662735184	4.928374512	7.557492896	3.362120236
id_139886662736784	15.51818479	60.0622949	2.40669204
id_139886662738384	15.2293845	46.94795719	2.328042408
id_139886662739920	23.02535529	48.46422668	3.912048244
id_139886662741520	24.65435573	3.813794558	2.100319426
id_139886662743120	18.49994652	24.27661591	7.000199414
id_139886662744656	5.128763591	79.48762247	2.44626439
id_139886662762640	21.05935508	11.95118956	3.23581113
id_139886662764176	11.54356257	3.069315229	3.219408569
id_139886662765712	24.60514505	9.942063588	0
id_139886662767248	27.7964746	6.3419063	0
id_139886662768784	25.15079238	23.73343755	2.871659216
id_139886662770320	11.95587179	41.89755425	2.490662173
id_139886662771920	35.21606547	10.69121752	2.650254195
id_139886662773392	13.32758065	54.63183257	2.899550624
id_139886662774928	10.33662414	45.85825888	1.518623809
id_139886662776464	20.01339246	44.16565383	3.493086763
id_139886662778000	14.81912208	61.66919676	2.527354821
id_139886662828752	20.0656923	15.55634919	2.313329062
id_139886662830288	4.674773431	51.20287096	1.906031308
id_139886662831888	23.59398925	8.785101639	2.027285554
id_139886662833424	38.762209	22.70454706	0
id_139886662834960	7.228215408	5	1.000191496
id_139886662836496	15.00929567	28.31240697	2.000322286
id_139886662838032	19.10698325	7.097278084	2.828427125
id_139886662839632	0	81.63619806	4.470143341
id_139886662841168	58.8176008	9.27081139	2.008528308
id_139886662842768	7.796607999	14.20727448	13
id_139886662844368	10.06630338	4.225581679	3.414622083
id_139886662878736	10.04198769	25.9235729	1.218188086
id_139886662880272	6.109160057	51.91854345	1.295170346
id_139886662881808	17.6206275	50.01012254	1.360838164
id_139886662883344	11.48499048	17.94328374	2.134798723
id_139886662884944	3.292810618	19.10741687	4.515038334
id_139886662886544	1.732050808	36.72018982	2.615565055
id_139886662888080	11.86194818	3.527286629	2.995190892
id_139886662889616	3.857758819	24.88796948	2.828427125
id_139886662891152	12.3856641	13.41520161	2.002843406
id_139886663582800	33.176798	19.36951592	1.829627796
id_139886663584336	6.225742579	35.83024439	2.517161771
id_139886663585872	49.08854798	6.350852961	3.506169625
id_139886663587408	62.02014496	46.28585445	0.93382505
id_139886663589008	39.06777001	64.17675591	1.438072931
id_139886663590544	41.21791582	39.96490869	3.969300789
id_139886663592144	16.62520545	11.68098404	2
id_139886663593744	17.49800841	41.01446847	2.336874347
id_139886663595344	80.30541596	67.64629537	0
id_139886663596880	4.79670274	23.7299666	2.886751346
id_139886663614928	32.68076572	48.68812993	1.893398548
id_139886663616464	4.041451884	24.95799988	2.720661936
id_139886663618000	70.34476239	15.2831353	0
id_139886663619600	30.99519658	11.69990865	2
id_139886663621200	6.041717855	40.07706303	2.880143832
id_139886663622800	9.526009657	5.004608866	2.033699583
id_139886663624336	23.14561607	33.66544682	2.892173508
id_139886663625872	27.82709039	2.500263434	4.263100258
id_139886663627472	41.35643583	46.42436071	0.577350269
id_139886663629008	2.624942066	29	1
id_139886663630608	21.01199163	6.882415226	0.707106781
id_139886663681424	4.463069823	6.418462599	2.189752317
id_139886663683024	18.01603569	7.17786623	1.342371833
id_139886663684560	68.90582565	24.7091816	2.54E-13
id_139886663686160	2.508841629	6.382777756	2.010998701
id_139886663687760	8.586526039	7	1.870694826
id_139886663689360	31.08592088	17.74490475	0
id_139886663690896	9.577885461	33.38020016	2.034203098
id_139886663692496	26.24499302	41.57318172	2
id_139886663694096	25.6695294	42.77586644	4.581902987
id_139886663695632	16.26345597	29.00106083	3.004673728
id_139886663713616	24.87857632	12.09998719	2.17904935
id_139886663715216	9.306089271	46.64222012	4.043904897
id_139886663716816	27.61304562	58.16316665	2.121320344
id_139886663718416	40.2369198	45.46236321	2.828427125
id_139886663720016	35.75314928	32.72713554	3.623056273
id_139886663721552	8.059808828	4.340969217	9
id_139886663723152	9.703759244	15.82695859	2
id_139886663724688	16.33695284	57.71754879	2.350523814
id_139886663726288	1.070651047	16.51677512	2.167954969
id_139886663727888	29.17575578	2.177598944	0.595958252
id_139886663778640	16.84736708	10.5259017	2.001863491
id_139886663780176	6	2.843243512	2
id_139886663781776	2.384638982	20.13712014	2.121320344
id_139886663783312	4.517626872	16.86369583	2.134688772
id_139886663784912	11.44000855	20.20869907	2.439198488
id_139886663786512	37.58317122	32.20958581	2.886751346
id_139886663788112	23.03628494	18.86518672	2.245651166
id_139886663789712	43.20678951	11.55940083	0
id_139886663791248	3.91140124	15.4151598	2.891369747
id_139886663792848	46.80876825	29.87365041	3.001913374
id_139886663794384	12.9351056	24.3413894	2
id_139886663828816	12.63048833	9.345517716	3.145701876
id_139886663830288	2.732483004	19.05255888	2.130684505
id_139886663831824	8.206627054	8.279437149	2.235500822
id_139886663833424	49.06748373	2.231005047	1.030685346
id_139886663834960	43.00163741	17.93809724	2.19323557
id_139886663836496	22.83556578	30.34411321	1
id_139886663838032	8.86556336	23.02522334	2.056319841
id_139886663839568	21.24824749	23.82326528	2.238370699
id_139886663841104	6.2394527	59.2985674	3.110104006
id_139886663842640	11.35497293	5.844510369	2.537487448
id_139886663860688	2.851145268	24.14430532	2.165146472
id_139886663862288	38.24243611	46.16307512	0.595186627
id_139886663863888	2.932677686	31.61677921	3.091452463
id_139886663865488	0	2.346565721	1
id_139886663867024	4.143122027	32.17221666	2.84857544
id_139886663868624	26.65293405	48.92075955	1.449870534
id_139886663870160	2.318338165	29.78282723	3.501038125
id_139886663871696	6.450284084	5.656854249	3.0425685
id_139886663873296	9.380145287	5.988445408	3.535533906
id_139886663874832	0.098198421	18.65577109	3.223705479
id_139886663876368	21.03192727	10.12036602	1.896744027
id_139886663959888	16.06249431	3.537115341	1
id_139886663961488	4.211866659	17.92588986	2
id_139886663963024	4.27035761	28.91795769	3.000091062
id_139886663964624	23.98524046	6.577317113	2.133040435
id_139886663966224	24.99103975	3.422971715	3.522417917
id_139886663967824	16.00526954	31.0061755	2.121320344
id_139886663969360	28.66510051	27.98783843	3.583269194
id_139886663970960	34.00898638	7.691309058	2.134984048
id_139886663972560	0.155035413	17.45467513	7.708350086
id_139886663974160	62.05681679	4.161094883	2.498696658
id_139886663992144	20.1918437	5.675856293	1
id_139886663993680	23.91441969	15.72352879	2.32232005
id_139886663995216	33.79825671	3.834037903	6.018682439
id_139886663996752	5.894285675	12.89339281	3.213627976
id_139886663998288	3.763466088	65.03931094	1.455363941
id_139886663999824	12.94103975	55.60329398	2.896397336
id_139886664001360	50.22822316	7.261834459	0
id_139886664002896	3.021040147	37.48331958	2.237422269
id_139886664004496	20.95429103	5.960266953	2.032813674
id_139886664006032	6.492282556	70.56205698	3.255990703
id_139886664007632	19.57833604	18.24256683	2.140695525
id_139886664042000	31.52117453	18.25627763	3.233736937
id_139886664043600	4.23234561	65.2424693	2.438971088
id_139886664045200	15.84874781	46.82582738	1.645380128
id_139886664046800	73.04975215	4.05006945	0
id_139886664048336	2.890482874	2.780946408	2.051234074
id_139886664049936	10.96965511	8.603515431	2.314798536
id_139886664051536	27.6127552	15.66505631	1.38249267
id_139886664053136	60.64080011	15.29512263	0.269644079
id_139886664054736	18.25131887	65.50618317	2.225698675
id_139886664056336	39.34118831	27.6693897	2.744093086
id_139886664090704	38.4995338	3.122261963	2.018664908
id_139886664092304	6.676589491	6.267124025	1.63358178
id_139886664093904	9.64687511	1.52058705	3.660218572
id_139886664095440	3.571637494	4.618802154	4.651557461
id_139886664096976	28.21455363	31.24567827	0
id_139886664098512	14.22748805	8.936605488	2.394490072
id_139886664100048	5.139340301	17.12470231	2.808503117
id_139886664101648	4.621056993	60.22243073	2.139896917
id_139886664103184	23.68167252	18.09113434	0
id_139886664104784	32.77011662	4.116772073	2.453285541
id_139886664139152	6.110477965	9.290803068	1.899316198
id_139886664140752	3.916066593	1	3.246827755
id_139886664142288	20.65836806	10.48705869	1.78E-14
id_139886664143824	13.03328467	57.36377979	2.176789262
id_139886664145360	9.779442911	11.59955067	3.243064539
id_139886664146896	7.103123321	13.89094153	3.186860728
id_139886664148432	7.902607308	32.80470203	15.13971137
id_139886664149968	7.325678172	8.507087006	2.191128032
id_139886664151504	11.40990767	13.43939476	1.397515521
id_139886664153040	8.485281374	3.734115993	2.147659215
id_139886664154576	9.791739042	1.154700538	2.012391565
id_139886664172624	29.50424976	44.45597073	3.686033108
id_139886664174160	16.5015411	43.25943817	2.828427125
id_139886664175696	17.20137845	49.78878049	2.846666874
id_139886664177232	11.57966947	42.92683167	1.842414197
id_139886664178768	18.9675082	35.22571688	2.687172023
id_139886664180304	8.341550788	2.155621979	3.648782314
id_139886664181840	31.57657754	42.38246868	2.317213887
id_139886664183440	9.567266526	35.74227421	0
id_139886664184976	2.540797055	75.38286058	3.598295112
id_139886664186576	11.42107227	19.02341381	2.829901144
id_139886664221008	27.30613526	22.68809012	2
id_139886664222608	45.70557953	50.65570057	4.949747468
id_139886664224208	44.59820624	52.70673581	5.338539126
id_139886664225744	1.494240175	25.73832289	2.277141183
id_139886664227280	1.493124415	10.14305693	2.563321807
id_139886664228816	6.403701422	42.38517632	1.763503028
id_139886664230352	7.109697502	25.57962451	2.195725507
id_139886664231888	7.102260542	6.368829203	2.820920028
id_139886664233424	8.757743242	25.97808781	4.245071521
id_139886664234960	6.008461364	34.37483195	1.904661635
id_139886664236560	8.258944831	39.69526694	2
id_139886664287312	15.05311587	86.84662762	2.56061513
id_139886664288848	25.08753915	71.55676193	2.18780186
id_139886664290448	14.47331384	85.12230707	3.134026851
id_139886664291984	2.86890468	80.49936088	3.31133111
id_139886664293584	5	51.63054267	2.462354337
id_139886664295120	4.022964984	32.84319877	2.057965273
id_139886664296656	4.909562529	3.874543633	3.137779199
id_139886664298192	3.36993917	35.52769073	2.025220087
id_139886664299792	3.756644139	17.18533465	2.331051054
id_139886664301328	12.90646643	25.39506668	2.451209574
id_139886664352080	3.85597141	94.99182849	2.512426908
id_139886664353616	32.93685652	3.49355883	2.398916831
id_139886664355152	0	3.464101615	0
id_139886664356688	0	31.70982301	0.242735865
id_139886664358224	21.68781853	43.3859056	1.283284674
id_139886664359824	27.82105816	56.88781664	2.172911061
id_139886664361360	9.636692948	20.09632148	0.364973463
id_139886664363920	8.122131309	8.725608744	2.635308685
id_139886664364432	1.996219332	86.02319558	3.48095009
id_139886664365968	13.47305289	34.06514569	3.240471595
id_139886664367504	36.9125189	7.980188216	19.57404025
id_139886664401872	9.497764868	7	2.443914794
id_139886664403472	5.434799915	36.39389913	7.048927646
id_139886664405008	25.38907241	2.948391196	2.286554322
id_139886664406608	33.80115668	18.94701917	2.418147068
id_139886664408144	27.20345391	10.91257808	3.101677755
id_139886664409680	4.377585592	43	3
id_139886664411216	3.645248246	37.74780487	4.949747468
id_139886664412752	5.847477503	39.66397242	2.297928304
id_139886664414352	7.903947536	14.58625209	4.217374468
id_139886664415888	4.348934376	19.69876747	2.38431626
id_139886664450320	19.26241961	29.572442	3.464101615
id_139886664451920	6.752707142	38.35237535	1.824308883
id_139886664453456	40.08516512	18.46833333	6.544417163
id_139886664454992	4.44867929	42.59596168	2.032795493
id_139886664456528	40.33971826	86.80441407	1.626849868
id_139886664458064	20.73470524	41.84313555	0.308814704
id_139886664459600	32.36479867	4.19322346	2.750024133
id_139886664461136	2.643457116	52.50485023	2.140810437
id_139886664462672	25.43994736	10.30454331	2.360296551
id_139886664464208	5.207005081	43.92654034	2.167228079
id_139886664465744	10.33343979	16.68580549	2.447811295
id_139886664500112	16.11775449	11.32576537	2.389039446
id_139886664501712	19.0417617	85.22310341	2.650374049
id_139886664503248	10.88976049	5.016339687	2.296875357
id_139886664504784	11.65580141	44.45022543	2.288471149
id_139886664506384	1.243021565	24.68964876	1.850866105
id_139886664507984	22.2311317	53.46102049	2.121320344
id_139886664509520	9.250314975	23.31507954	2.519819868
id_139886664511056	3.572991053	28.90576808	2.886751346
id_139886664512592	57.12592807	7.570063712	1.889546959
id_139886664514192	2.284864766	30.04406088	2.435872481
id_139886664548560	33.59209923	35.57856815	0.709021505
id_139886664550096	16.83731534	5.837972907	1.503276017
id_139886664551632	4.714204837	40.68375244	2.31786845
id_139886664553232	5.757714682	69.38500728	3.213587484
id_139886664554832	2.385139602	20.16636517	2.332386426
id_139886664556368	85.78071953	36.58730113	2.121320344
id_139886664557904	2.248336301	72.19023738	2.444796613
id_139886664559440	24.34550094	8.797301784	2.03331754
id_139886664560976	28.5809713	31.23619439	3
id_139886664562512	39.84191299	2.828978876	2.030959892
id_139886664564048	25.00325451	49.69924139	2.330737074
id_139886664598416	30.08584404	45.53009535	2.121320344
id_139886664599952	20.85379198	13.23534229	2.541812213
id_139886664601488	10.15318593	49.61571565	0.218961823
id_139886664603088	32.65528854	8.231907282	2.887109596
id_139886664604624	38.79276886	3.777521738	1.673964967
id_139886664606224	13.88732856	22.29954652	3.868940168
id_139886664607824	25.85467038	53.06861596	3.978678133
id_139886664609360	26.56147702	24.7143107	1.157525793
id_139886664610896	26.10678426	10.53379799	2.519280264
id_139886664612432	10.3704854	31.03619736	0
id_139886664647504	8.487515188	73.93122147	4.051320294
id_139886664649040	18.66260577	4.914641221	2.402674265
id_139886664650640	12.49875045	5.489727795	2.542122787
id_139886664652240	2.902822995	21.76288353	3.089043343
id_139886664653840	41.73063714	8.937815313	4.132215821
id_139886664655440	29.26796017	119.1905186	3.136561765
id_139886664656976	2	17.27001715	1.736815249
id_139886664658512	4.428424954	3.513965595	3.429322422
id_139886664660048	14.84925486	5.391256995	2.009320981
id_139886664661584	8.522302437	23.62709082	3.167907959
id_139886664712336	11.17471742	82.95397437	2.235272095
id_139886664713936	3.659213399	3.559851225	2.126084045
id_139886664715536	24.53312599	4.041451884	2.194777624
id_139886664717136	89.35128521	11.82921797	0.058516549
id_139886664718736	21.50654407	5.044072928	3.723624397
id_139886664720336	5.196152423	45.37235303	3.586830621
id_139886664721936	7.434185509	4.313199528	8.973594433
id_139886664723536	6.391652613	13.57290416	2.430141086
id_139886664725072	15.26583291	18.18380402	2.765595241
id_139886664726672	19.4523095	1.001378494	3.916221281
id_139886664728208	31.71975838	81.27254677	1.24E-14
id_139886664746192	125.9017347	36.07000044	4.018475182
id_139886664747728	24.62505497	13.80147978	1.340667295
id_139886664749264	23.48098244	19.91613584	1.498421416
id_139886664750864	5.006331923	8.230519483	2.462245978
id_139886664752464	0	8.939134944	2.521829025
id_139886664754000	2.886751346	87.83539847	1.447617776
id_139886664755600	33.86246666	26.70496642	0.404897604
id_139886664757136	20.92640761	34.12949014	1.063448818
id_139886664758736	3.340798331	8.017867627	2.491766718
id_139886664760272	110.2742313	4.732703197	1.414213562
id_139886664794704	21.5524486	37.95666217	2.886788146
id_139886664796304	7.200763449	84.39928679	2.121298924
id_139886664797904	30.08333904	12.98248898	1.649384186
id_139886664799504	2.828427125	97.40459042	2.828427125
id_139886664801104	13.67631414	10.28060397	2.514179811
id_139886664802704	19.92028628	60.43686877	0.010400375
id_139886664804240	35.35208705	39.64433457	2.048686592
id_139886664805840	95.64459786	2.297010451	2.309402582
id_139886664807440	12.90377305	82.712524	1.00245301
id_139886664809040	9.246076115	4.151131629	2.198968501
id_139886664843472	13.55024408	97.76172101	3.136951267
id_139886664845072	25.0113926	57.64850461	3.421871185
id_139886664846672	29.51230326	14.81181227	1
id_139886664848272	6.759310739	68.48547502	0.630892854
id_139886664849808	19.39005153	38.04468257	0.043818431
id_139886664851344	4.205982587	36.33828644	3.547719719
id_139886664852944	22.75694022	66.59901404	1.42E-14
id_139886664854480	4.924754765	103.6139351	2.485938074
id_139886664856080	31.53807054	17.82992132	0
id_139886664857680	6.450385023	14.14681469	1.134158586
id_139886664859280	5.15573939	59.44045556	3.074778523
id_139886664893712	1.338035684	42.38510253	0.101425297
id_139886664895312	8.949176158	8.518244914	3.079845278
id_139886664896912	25.81424969	80.72161693	0
id_139886664898512	7.320862096	13.4871261	2.035187817
id_139886664900112	25.18756392	106.5889191	0
id_139886664901712	1.90254936	5.990361355	1.553442503
id_139886664903248	25.75784293	2.481783558	2.149986936
id_139886664904848	18.78975609	39.80516471	0
id_139886664906448	15.20704979	33.42709363	0.585513874
id_139886664908048	12.7180644	5.000005662	2.455187577
id_139886664942416	15.462451	29.4687216	3.073797028
id_139886664943952	52.57364943	13.27472397	2.973337033
id_139886664945488	12.7939943	35.7165378	1.010677816
id_139886664947024	6.101994601	27.26947805	2.728281731
id_139886664948560	47.51841748	109.3252029	12.68857754
id_139886664950160	17.43871923	4.132941286	2.473152486
id_139886664951696	0.1902328	18.33504461	3.157281662
id_139886664953296	23.77349902	44.25108185	2.321312797
id_139886664954832	30.13539471	22.52443697	3.599910191
id_139886664956432	46.65652359	29.68143982	1.48812657
id_139886665007248	21.78449035	73.25615072	1.414213562
id_139886665008784	29.18983629	59.8434113	0
id_139886665010320	44.22264094	37.98549046	0.852993354
id_139886665011920	10.31480861	26.30620509	2.201327322
id_139886665013520	18.72696674	23.29603314	2.886751346
id_139886665015120	14.03786083	94.0555636	1
id_139886665016720	33.30813282	10.69503063	2.841908761
id_139886665018320	17.08595643	8.751569355	2.371624798
id_139886665019856	18.5100101	64.82628503	0.024578134
id_139886665021456	8.797711637	57.07246602	1.650409882
id_139886665023056	2.08809265	10.12055982	2.1842081
id_139886665057488	16.37027962	7.071067812	2.256850146
id_139886665059088	24.21642296	34.45367052	3.252000253
id_139886665060688	20.02014763	87.90844207	1.112349237
id_139886665062288	26.36870118	20.427241	2.27356309
id_139886665063888	10.38583813	41.36097771	3.543663417
id_139886665065488	35.17101079	110.5667219	11.48912529
id_139886665067024	9.005838259	5	2.126135746
id_139886665068560	1.371293557	18.8558652	1.864756595
id_139886665070096	24.36041109	17.50399628	2.734596878
id_139886665071632	16.49157825	89.62650705	1.14E-13
id_139886665106000	21.47557846	25.64711349	2
id_139886665107600	11.86611118	2.136602906	2.409523666
id_139886665109200	36.04711927	12.58934228	1
id_139886665110800	7.013353026	1.210123545	2.06444989
id_139886665112400	24.97400584	51.64610525	2.889934998
id_139886665113936	3.279844134	21.24307281	1.942652988
id_139886665115536	0.585494992	26.91596351	2.53665923
id_139886665117072	26.78217866	61.92860451	2.795016255
id_139886665118672	29.11763896	56.16821475	0
id_139886665120208	23.18902727	5.372114265	3.212048802
id_139886665154640	12.18998534	40.38914956	3.05221087
id_139886665156240	12.22770102	12.33501647	1.739659689
id_139886665157840	24.41912999	9.589388303	0.875028725
id_139886665159440	14.52461341	34.92035026	2.414448722
id_139886665161040	8.727912403	84.34109305	2.896987223
id_139886665162640	5.764610904	64.92666631	3.552781256
id_139886665164240	33.34146655	39.75094951	2.585238517
id_139886665165840	16.11838601	5.422798983	2.531709938
id_139886665167376	45.28265795	1.330404156	2.239932107
id_139886665168912	43.03656159	46.95327023	2.410219913
id_139886665170512	3.542918089	2.846150731	3.429501557
id_139886665204944	18.68272589	3.172148952	2.224086947
id_139886665206480	27.91680195	20.6793534	0
id_139886665208016	9.783581878	3.47957521	1.404367189
id_139886665209552	18.89150344	66.72279728	2.044260139
id_139886665211152	36.84848058	26.19907272	0.844852362
id_139886665212752	19.48077787	40.54476251	1.482012359
id_139886665214288	25.95400405	55.84807183	1.856692453
id_139886665215824	0.84528182	122.1101761	3.703627234
id_139886665217424	23.36165202	3.879716966	1.942401008
id_139886665219024	5.789880774	78.03222539	2.266165945
id_139886665253392	36.14244019	25.45846943	2.12840461
id_139886665254992	4.870896754	30.97327695	0
id_139886665256592	60.1522175	47.22900413	3.415951462
id_139886665258192	18.04855395	74.20582208	2
id_139886665259792	6.574933954	6.348032769	0.634811088
id_139886665261392	17.1919519	57.89761893	0
id_139886665262992	36.33952516	10.23330884	2.126665915
id_139886665264528	24.3652876	65.92099215	0
id_139886665266128	10.59958346	112.3690376	2.121320344
id_139886665267728	51.01298146	6.110816087	1.159092616
id_139886665318544	2.491181156	57.70419094	1.818051034
id_139886665320144	5.196152423	26.65401258	0
id_139886665321680	55.18898525	35.33502009	1.434477856
id_139886665323216	31.82284388	43.88203304	2.681137528
id_139886665324816	12.44870275	51.70931155	4.177459979
id_139886665326416	6.971907176	32.14278951	0
id_139886665328016	61.09484279	0.707106781	3.003672075
id_139886665329616	3.341871446	18.87900988	0
id_139886665331216	4.43359386	78.11749679	2.795770444
id_139886665332752	28.10255589	102.5246857	2.354904667
id_139886665334288	3.680922728	56.34331142	3.998600533
id_139886665368720	33.50432396	2	2.543399273
id_139886665370320	25.75681823	79.34324266	1.644994276
id_139886665371856	24.06492202	7.461973282	2.723394898
id_139886665373392	16.63447924	66.55804916	2.886751346
id_139886665374928	34.76296018	8.271916984	1.420942759
id_139886665376528	20.62858101	62.80207792	0.114473612
id_139886665378128	20.20210977	3.344761993	2.315921162
id_139886665379664	10.53882725	109.7875119	1.450521128
id_139886665381200	75.23961722	55.87486018	6.363961031
id_139886665382800	2.275218069	46.83631999	2.492341638
id_139886665400848	23.35156397	5.196152423	2.060635781
id_139886665402448	22.07402285	93.78587222	0.198432531
id_139886665404048	88.57697098	32.2165615	3.004175313
id_139886665405584	32.63425805	27.30438211	0.57746258
id_139886665407184	25.87768712	42.22561116	3.561488977
id_139886665408784	5.779809912	8.389423694	2.367355107
id_139886665410384	13.26482498	20.71732868	1.321714189
id_139886665411984	44.15415338	38.69229958	0.097420992
id_139886665413520	4.392364646	4.700107391	0
id_139886665415120	42.15206132	30.43779475	1.156368476
id_139886665416656	7.073709012	56.61489023	2.886751346
id_139886665467472	6.419969159	46.89804662	1
id_139886665469072	7.82865233	49.37662337	3.318203227
id_139886665470608	45.63030519	29.15669616	4.727041461
id_139886665472208	15.91034225	24.82764687	3.338433046
id_139886665473808	5.885094953	0.721959107	1.54222668
id_139886665475408	1.7741013	12.23093037	2.213578709
id_139886665476944	21.76209497	12.37125573	1.750047882
id_139886665478544	9.588141529	2.82959353	2.440645033
id_139886665480080	4	2.224562234	8.113620294
id_139886665481616	50.14738194	11.47697177	1.15E-13
id_139886665516048	83.91342018	44.44207497	0
id_139886665517648	6.437437753	21.16287689	2.912954392
id_139886665519184	28.08383633	5.674179018	1
id_139886665520784	4.721380468	12.24169634	2.168810354
id_139886665522384	11.19441575	8.566504639	2.642697371
id_139886665523984	85.01460412	74.41384855	0
id_139886665525584	8.709308081	39.27137415	2.828441508
id_139886665527184	4.115183136	30.31870775	3.535533906
id_139886665528784	12.78226785	48.65722883	2.828427125
id_139886665530256	43.85726469	27.04365675	1
id_139886665548240	47.88580556	4.242640687	1.019495421
id_139886665549840	2	31.2392814	2.335967513
id_139886665551440	21.34123885	23.52055918	2.256695514
id_139886665553040	5.863520362	46.23311508	2.121320344
id_139886665554640	27.30980654	67.19778551	2.365638785
id_139886665556240	63.4717178	59.14162865	0
id_139886665557840	50.15397367	41.24638739	3.55E-15
id_139886665559440	37.66203989	31.18719485	0
id_139886665560976	5.570888894	50.71875162	0
id_139886665562576	10.09687894	31.14415716	1.751856395
id_139886665564112	36.42469945	7.208753256	1.015013283
id_139886665614928	6.027609435	42.43769504	1.884288718
id_139886665616528	16.0877609	4.130040825	2.118765816
id_139886665618128	39.042055	10.35968698	3
id_139886665619664	18.04446119	37.06438334	2.222210061
id_139886665621264	57.90182386	27.98071402	0.334079291
id_139886665622864	10.49307744	6.394237804	2.668640811
id_139886665624464	21.66719277	37.99564682	3.052231162
id_139886665626064	53.35630603	7.375668081	0
id_139886665627664	4.114089851	79.23036712	1.11277785
id_139886665629200	46.27279654	28.55471093	1.482603063
id_139886666184208	4.266863082	174.8112818	3.244224154
id_139886666184464	14.60690763	159.62538	2.203327881
id_139886666186256	13.72614744	201.9614779	6.92820323
id_139886666204304	18.95560086	109.0178218	3.099811514
id_139886666205904	0	117.2377389	2.063592531
id_139886666207440	3.773463071	115.044936	2.714938605
id_139886666208912	6.658318242	18.15880152	1
id_139886666209104	6.16764554	35.95624429	2.33251573
id_139886666210704	54.10536386	63.60422713	0
id_139886666212304	39.09901752	81.98995989	0.124988324
id_139886666215376	15.37102645	124.7334606	2.3662192
id_139886666216976	62.60944659	58.69938972	0.301010081
id_139886666218576	3.195323243	134.8171057	2.292418077
id_139886666285776	0.261242047	113.0322482	2.182317658
id_139886666287376	17.90538393	21.16114807	1.000048713
id_139886666288976	2.616300453	61.6900766	2.393475134
id_139886666290512	59.71941687	18.04220036	1.42E-14
id_139886666292112	10.2559875	4.710186857	1.445209668
id_139886666293648	19.85882452	80.55575871	2.801294726
id_139886666295184	5.206353607	86.17759039	3.464101615
id_139886666296784	4.344160388	56.99160822	1.94541984
id_139886666298384	0.80007617	32.62339436	2.737316226
id_139886666299984	57.95694797	3.448568668	0
id_139886666334416	72.08547481	21.24632526	0
id_139886666336208	49.1034772	2.430558102	0.133390303
id_139886666337808	1.669302978	65.44224212	3.02315671
id_139886666339408	36.02046169	42.87367265	2.014794748
id_139886666341008	33.20331216	29.21155811	2
id_139886666342608	2.084488136	43.46051899	1.130370382
id_139886666344144	2.801330852	31.33607232	2.337097268
id_139886666345680	19.74475669	28.2817996	2.756376258
id_139886666347280	7.640125186	57.19972131	2.131454772
id_139886666348880	25.36009711	54.50489195	2.317478184
id_139886666350480	4.857182619	48.23708127	4.419440682
id_139886666384912	29.24307945	23.47369741	2.064824245
id_139886666386448	14.27979542	40.23967938	1.618733503
id_139886666387984	20.71215681	7.303684804	1.780873941
id_139886666389584	2.901646993	30.17458048	2.830175176
id_139886666391184	7.45683353	135.5382276	2.49E-14
id_139886666392720	30.92740465	63.82114653	2.372404765
id_139886666394256	26.38854849	7.901556354	10.36356516
id_139886666395856	20.42295312	4.939341174	2.048130606
id_139886666397456	5.133781317	1.802417963	3.094742832
id_139886666398992	7.459983445	16.36367634	2.198503392
id_139886666449744	12.12020036	19.62928578	2.313975302
id_139886666451344	5.281100523	49.67480581	2.828669945
id_139886666452944	3.640712661	3.506513229	2.828427125
id_139886666454544	11.96415943	3.833467921	2.734431897
id_139886666456144	29.88590828	37.35681463	1.523263657
id_139886666457744	3.006074895	49.05697405	2.485159867
id_139886666459280	0.997686669	4.891463582	4.835123148
id_139886666460816	12.05154528	80.38135119	2.893798198
id_139886666462416	25.19734574	5.151778617	2.082416242
id_139886666463952	5.902525381	4.34667058	2.36467993
id_139886666498384	18.18186108	42.33676876	4.955579037
id_139886666499984	54.90152942	78.46986729	1.167744754
id_139886666501520	16.82737321	192.7449194	2.22E-16
id_139886666503120	13.0031489	6.928565148	2.13881994
id_139886666504720	3.825119147	64.48913557	2.322965187
id_139886666506320	15.42864454	3.016678813	1.766474633
id_139886666507920	18.47033315	11.24456344	3.082267972
id_139886666509520	6.798068447	15.52270662	2.828479027
id_139886666511056	64.01726519	23.06134557	0.948890639
id_139886666512656	3.464101615	33.49340977	2.468076206
id_139886666514256	42.60362839	30.78474639	2.602025524
id_139886666532304	6.489126276	54.47095893	2.429846156
id_139886666533904	27.92684161	23.37964161	2.121320344
id_139886666535504	5.016349113	55.78447868	3.171507372
id_139886666537104	33.16791247	67.58691535	2.470972098
id_139886666538640	47.20409385	4.242640687	2.222520771
id_139886666540240	52.09045283	89.02706847	2.333171949
id_139886666541776	7.455605536	134.8621165	1.859727256
id_139886666543376	11.36979217	77.07463915	13.37973746
id_139886666544976	6.513402152	67.02652144	2.148729476
id_139886666546512	44.6353549	4.041451884	3.06208167
id_139886666580944	20.53958305	49.82856489	2.064961984
id_139886666582480	8.980731371	58.3343817	0
id_139886666584080	6.221520281	11.0390464	2.589127665
id_139886666585680	1.154700538	6.05229183	3.614673979
id_139886666587216	7.427236141	25.45584412	2.505124054
id_139886666588752	1.414213562	89.5304479	2.321739022
id_139886666590288	26.29122728	17.93802782	1.758461447
id_139886666591824	9.781487722	26.63211444	2.353741646
id_139886666593424	3.269115874	25.08964632	2.848339357
id_139886666594960	9.007864854	44.04758128	2.169528036
id_139886666629328	23.82720372	39.33642705	3.114877987
id_139886666630864	4.626739054	2.055699273	1.227830287
id_139886666632464	13.28039926	36.78321813	2.85002745
id_139886666634064	12.328493	43.21956118	1.894182789
id_139886666635664	30.19274531	15.51886386	2.546956605
id_139886666637264	12.81759136	8.522814736	2.321668951
id_139886666638864	8.509100095	18.82368104	1.415652907
id_139886666640464	50.22393783	60.12343566	1.837914949
id_139886666641936	4.027870396	73.44763441	2.121320344
id_139886666643536	23.47343348	161.9622456	0.370631876
id_139886666645136	15.19300527	6.733615027	2.969988755
id_139886666712336	4.436016825	35.92126999	2.2808645
id_139886666713872	34.03096701	4.039516141	2.673435204
id_139886666715472	24.16549105	5.479349759	2.886751346
id_139886666717072	6.067277566	36.97737908	2.471161749
id_139886666718672	73.7748934	28.36107695	2.576360415
id_139886666720272	1.707676037	39.46875729	2.052438211
id_139886666721808	35.47734449	4.333125986	2.167899275
id_139886666723408	2.739366328	21.97720658	1.265353598
id_139886666725008	2.873402624	23.04050514	2.85730958
id_139886666726608	4.909406955	46.59065266	1.870989924

## Sheet: T_table
Ca. Methanothrix pelomyxae distance matrix
cell_id	TtoC	TtoS	TtoB
id_139826404901584	34.8522223	38.34215867	4.777732137
id_139826404903120	8.566268803	32.06012845	4.703008179
id_139826404904656	41.51846409	36.2750173	2.797457951
id_139826404906256	8.082903769	7.717972669	3.464101615
id_139826404907856	11.40562917	30.96843495	5.656854249
id_139826404909456	19.10126631	11.33315538	6.782284492
id_139826404911056	27.01847906	46.64861838	5.397564634
id_139826404912656	17.26046374	46.1879731	11.68824787
id_139826404914256	11.2744949	24.97073303	10.39620751
id_139826404915856	38.00264437	52.81540935	6.363961031
id_139826404933840	31.59679121	2	7.214841456
id_139826404935440	20.13896757	59.21030916	4
id_139826404937040	34.44148346	4.342176269	7.174134437
id_139826404938640	34.04832417	4.032874235	4.683305959
id_139826404940240	43.70481653	25.78801781	4.606327868
id_139826404941840	81.42516247	36.72991477	3.467656145
id_139826404943376	12.21595932	10.85224057	3.209843211
id_139826404944976	17.30694346	25.28819234	9.300141233
id_139826404946512	44.26732408	17.91681311	3.003888527
id_139826404948112	24.79015516	43.30614848	3.711206532
id_139826404949712	3.793973799	20.09787962	5.884964148
id_139826404984144	22.60193561	14.67554593	4.423926716
id_139826404985744	30.48403235	15.61184268	6.395728521
id_139826404987280	67.11324586	16.49026175	4.062930227
id_139826404988880	29.64127479	13.67577706	3.964639968
id_139826404990480	18.31271816	7.409001445	10.97069088
id_139826404992080	3.576413036	23.94210676	3.241953373
id_139826404993552	41.93727537	10.37892387	2.828427125
id_139826404995152	9.369464474	3.702820937	4.630187752
id_139826404996688	7.710718368	14.23322074	5.934596946
id_139826404998288	2.314092291	28.74323392	12.02082105
id_139826405032656	44.40848142	30.48318141	9.926910288
id_139826405034192	39.67058521	42.11274648	2.82880241
id_139826405035728	28.32318039	7.505553499	3
id_139826405037264	40.42563426	8.317232161	3.600954343
id_139826405038864	35.90700125	28.45528817	4.045645335
id_139826405040464	56.1269874	43.46315398	2.863576428
id_139826405042000	51.5664308	61.85884878	4.031092598
id_139826405043536	21.93266032	73.23731488	2.74643023
id_139826405045072	39.19055221	2.87290235	3.535533906
id_139826405046608	75.32006639	51.38783519	3.036535084
id_139826405048144	33.89987354	33.08013577	4.389973655
id_139826405066192	21.32413522	7.176689022	3.353197669
id_139826405067792	55.74925054	20.16007771	6.413169325
id_139826405069392	55.9531356	35.77743693	8.086391715
id_139826405070928	41.49530357	11.93057796	3.841486239
id_139826405072528	54.77399651	47.22074771	3
id_139826405074128	15.90973778	42.47362802	3.137116347
id_139826405076752	4.756290634	32.52691193	3.111760135
id_139826405077264	38.73348365	3.564051581	3.268897186
id_139826405078864	42.41963332	5.013557777	3.757943483
id_139826405080400	34.43268094	52.93164823	11.70023414
id_139826405147536	32.61180181	13.03657545	3
id_139826405149072	8.427500853	9.647340275	5.716843193
id_139826405150608	67.01998794	60.36068229	6.168771111
id_139826405152208	43.04299107	57.67925557	3.565471296
id_139826405153808	61.21747581	37.80498185	4.673689497
id_139826405155408	4.088687715	36.05879885	10.21999457
id_139826405156944	70.74868142	58.36866865	2.985711993
id_139826405158480	77.82851462	34.27964884	3.000317936
id_139826405160080	29.31744071	44.4070918	3.464840527
id_139826405161680	60.49920069	29.1737551	3.535533906
id_139826405212496	67.21574091	3.86750419	7.294479106
id_139826405214096	46.03285779	41.39225862	5.730905195
id_139826405215696	14.15793233	29.49213538	4
id_139826405217296	66.10652053	3.583598494	7.440132591
id_139826405218896	4.633248985	25.44616529	6.379579089
id_139826405220496	78.09404123	44.81803512	4
id_139826405222096	64.07051259	13.7471608	3.520639174
id_139826405223696	54.43721694	9.253099652	3.392036639
id_139826405225296	56.2087221	87.38634705	2.493394913
id_139826405226832	67.12953289	16.41309107	5.156224457
id_139826405228368	7.392464496	6.064418531	4.434968934
id_139826405246416	34.61830718	49.52190618	6.748695982
id_139826405247888	75.38091227	42.51120246	3.873492617
id_139826405249424	42.59329018	52.14364046	4.516317623
id_139826405250960	38.42770092	33.92067988	5.038269107
id_139826405252496	18.07758782	10.97246768	3.66457891
id_139826405254096	53.51385367	24.37961682	13.24204696
id_139826405255696	38.230372	4.203908783	2.980951767
id_139826405257232	22.06612322	33.76244973	2.96418643
id_139826405258832	90.20846212	42.03088396	3.129172654
id_139826405260368	67.67735769	16.11150186	4.189523229
id_139826405311120	50.91168825	27.77341093	10.43083769
id_139826405312720	26.6154914	32.90457446	2
id_139826405314320	33.96951565	13.69906327	4.831560317
id_139826405315856	69.9469262	9.505713103	1.427499358
id_139826405317392	6.880568658	4.191361828	5.90161005
id_139826405318992	74.52318913	70.73209474	8.917421882
id_139826405320528	52.2713077	35.37066569	3.544623067
id_139826405322128	89.32765159	59.13394802	4.536762512
id_139826405323664	50.75528514	60.03317465	3.807023209
id_139826405325264	45.90174653	57.83683505	4.097595768
id_139826405326800	4.470461654	14.03824636	12.77045231
id_139826405344848	59.27649114	73.83185342	3.377850407
id_139826405346448	76.49657692	51.50060751	6.002671531
id_139826405349072	68.42062611	69.13060757	3.921603921
id_139826405349584	83.91944204	34.81713306	4.962925446
id_139826405351120	68.24710214	25.47813666	2.886751346
id_139826405352656	49.70298574	40.93426914	4.370053504
id_139826405354256	51.74634609	83.39903601	6.015966735
id_139826405355856	37.10358681	36.00045823	15.36164705
id_139826405357456	79.51831123	72.41814768	3.158787868
id_139826405359056	49.07924665	31.41419394	3.617563496
id_139826405393488	53.7607776	13.63924114	6.394291205
id_139826405395024	67.2559839	62.93250353	3.745173902
id_139826405396624	86.79032507	71.51843872	6.423950526
id_139826405398224	5.055160567	17.77801969	7.394831445
id_139826405399760	74.28944391	98.73431811	2.754566313
id_139826405401360	9.853936809	29.82448415	10.75632718
id_139826405402896	8.485363606	39.82453153	16.77791464
id_139826405404496	53.97703571	26.09267075	7.87731252
id_139826405406096	32.84914035	61.04075692	2.895774468
id_139826405407696	25.86807788	6.350852961	8.782696228
id_139826405442064	79.68739855	97.30241546	3.868576319
id_139826405443664	11.55452191	27.86578544	27.31518779
id_139826405445264	82.42949091	69.45785629	2.774595997
id_139826405446864	20.19565005	62.54702825	4.071875509
id_139826405448464	68.8829306	39.30596947	3.065895054
id_139826405450000	72.79092055	80.12514452	3.089251688
id_139826405451536	96.21831912	88.39573385	3.764984785
id_139826405453136	30.72132504	98.9993718	4.138311988
id_139826405454736	4.341262171	52.29046352	3.019729512
id_139826405456272	41.11300654	85.80192871	3.226922424
id_139826405457872	22.23220076	74.92474505	3.156175061
id_139826405492304	72.86649353	93.15404392	4.183428445
id_139826405493840	73.89942337	104.2704107	2.464258529
id_139826405495440	90.41989586	88.33154358	3.907888803
id_139826405497040	102.5879597	78.24254298	3.945685947
id_139826405498576	47.29111641	61.72964696	2.717809473
id_139826405500176	49.08854583	100.6022551	2.417986824
id_139826405501776	16.45631634	3.333552398	2
id_139826405503376	11.90060629	84.17797237	3.054483161
id_139826405504912	73.42281479	89.61603643	4.603601083
id_139826405506448	39.03437325	33.09887346	7.484535155
id_139826405557264	17.32050808	4.034365203	27.41119323
id_139826405558864	56.94232205	44.12145376	3.22629189
id_139826405560400	48.6530747	56.64856473	5.015603758
id_139826405562000	55.16528459	124.1055995	2.68053506
id_139826405563600	37.15573571	54.89598282	4.66146577
id_139826405565136	45.01538242	114.5172555	2.165222222
id_139826405566736	81.62473259	75.61583416	6.368174997
id_139826405568272	33.65469801	45.43753389	5.734527373
id_139826405569872	21.27316142	86.61571001	3.430426992
id_139826405571408	85.35478981	123.9627829	4.217078803
id_139826405622224	59.69667672	48.18057207	4
id_139826405623760	69.38088631	95.04100158	4.925564144
id_139826405625296	67.48549348	71.69308515	3.135057702
id_139826405626832	77.51823732	91.97320989	4.106043227
id_139826405628432	73.83678213	92.76791728	2.396939669
id_139826405630032	3	42.49126281	4.120391951
id_139826405631632	69.65120391	136.8470643	6.118034398
id_139826405633232	51.32223289	97.21492181	6.677871528
id_139826405634832	40.02438619	54.5698876	3.090398198
id_139826405636368	13.54295494	81.9124902	3.193454657
id_139826405637904	49.95663643	87.28085069	3.21805099
id_139826405655952	37.60264801	105.9111622	3.245626691
id_139826406010640	27.85982021	108.6478533	34.50674933
id_139826406010896	12.02081528	64.33737031	4.688269693
id_139826406012560	5.474651786	80.92403907	9.39530915
id_139826406014160	5	4.548269014	4.487045683
id_139826406032208	4.112232686	33.86092832	4.727720336
id_139826406033808	32.88647869	46.66904756	8.254183109
id_139826406035280	8.489742699	7.698781106	32.98881627
id_139826406035472	1.244997818	49.34454126	51.47050365
id_139826406037072	28.08499249	2	9.92164536
id_139826406038608	5.884854574	15.55211686	3.683415917
id_139826406041680	5.201168661	1.610707529	6.92875332
id_139826406043280	3.736066084	4.209428906	5.644188788
id_139826406044880	3.08607947	5.308554412	8.125582089
id_139826406046480	41.67608292	27.17618098	5.580445488
id_139826406113680	19.04392092	4.375698957	4.208627984
id_139826406115280	62.10536441	4.130862035	2.330935584
id_139826406116880	42.21012251	5.172136562	1.638732573
id_139826406118480	53.82183758	7.186341911	5.260006429
id_139826406120080	5.081039061	5.668338283	23.26762305
id_139826406121680	39.63312153	3.174294611	19.04954739
id_139826406123280	6.578829639	5.065172876	2.622842638
id_139826406124880	40.6287848	14.02860769	12.25593554
id_139826406126416	0	25.8327785	13.57150591
id_139826406128016	54.75576687	4.078227458	6.354383754
id_139826406195408	22.64630298	4.930135618	2.991247191
id_139826406197008	50.86851295	16.16580754	5.215900353
id_139826406198608	50.09217062	3.922261771	6.67273584
id_139826406200208	22.47498054	5.898005673	13.27905619
id_139826406201808	5.512750794	5.300818894	12.73303052
id_139826406203408	3.850913544	3.464101615	4.495828717
id_139826406205008	47.0987931	9.397988779	4.257006243
id_139826406206608	55.4402797	16.03298222	11.75430021
id_139826406208208	12.90823351	23.18576587	2.253519809
id_139826406209744	25.10085403	15.70403665	5.698652878
id_139826406211344	21.08529685	3.704998957	5.24497535
id_139826406229392	0	6.099802284	4.959825638
id_139826406230992	7.43109357	3.499689508	3.55322933
id_139826406232592	24.81252551	4.289355718	9.836843209
id_139826406234192	64.25485919	10.29904967	2.413552079
id_139826406235728	21.63974032	4.618802154	4.04923414
id_139826406237264	13.85798354	8.401385872	5.995781044
id_139826406238864	2.728988224	4.299195729	3.509527917
id_139826406240464	16.07418607	0.707106781	2.994468107
id_139826406242064	3.58876353	11.61224468	4.057869401
id_139826406243664	14.44985651	4.135852842	2.121320344
id_139826406261712	22.8313167	5.279546028	3.406935178
id_139826406263312	20.85552332	4.041451884	3.172078451
id_139826406264912	2.828875134	1.263584214	3.903016955
id_139826406266512	9.588491412	8.510359018	6.161480156
id_139826406268112	26.26533817	1.741531029	4.891420143
id_139826406269712	47.53288972	35.25286285	4.327327687
id_139826406271248	3.553439762	4.70436911	6.377324477
id_139826406272848	47.94661844	4.805506252	7.691319989
id_139826406274448	37.96824258	19.87757282	2.592814995
id_139826406276048	26.82858178	2.95359351	4.230274574
id_139826406326864	7.181952375	17.74752959	4.440459294
id_139826406328464	66.9311875	2.680747711	9.486821777
id_139826406330064	17.36445378	2.770841456	0.91560599
id_139826406331664	11.85195067	17.40832725	2.610709106
id_139826406333264	7.066340294	4.389349568	10.75754937
id_139826406334864	108.1488576	3.158016746	3.078943672
id_139826406336400	11.65944165	5.009237617	2.828427125
id_139826406338000	15.39471267	24.86615511	6.700897882
id_139826406339600	36.67344665	8.793342226	0.970336549
id_139826406341136	37.87424718	15.28098776	5.758928597
id_139826406375504	50.99533473	28.31146925	2.312202243
id_139826406377104	18.39790928	5	7.224135343
id_139826406378704	24.18922542	22.89046483	4.390925869
id_139826406380304	26.84738013	4.147558018	7.178162721
id_139826406381904	19.70515435	6.081119069	3.598895566
id_139826406383504	19.09554544	23.78653257	13.92599705
id_139826406385104	35.60283307	23.09401077	4.682563596
id_139826406386576	0.513188136	6.470144384	3.291899316
id_139826406388176	9.65017333	10.13277548	3.588120759
id_139826406389776	55.66252088	17.27723234	3.901899952
id_139826406391312	4.16746535	2.70506724	2.279577288
id_139826406409296	41.94502883	5.803064609	1.873998399
id_139826406410896	15.58261437	6	2.016969859
id_139826406412496	51.60560984	9.981697809	4.971573218
id_139826406414032	14.74814253	3.348058317	5.180309417
id_139826406415632	30.91984554	1.250636794	2.872934084
id_139826406417232	4.972992104	3.362113498	2.450905662
id_139826406418832	8.660569775	4.243686705	3.28087696
id_139826406420432	57.16553437	4.391118306	11.19613291
id_139826406422032	38.63104583	4.242640687	4.523904463
id_139826406423632	17.36632953	5.159279692	5
id_139826406458064	2.94105012	2.063395157	2.847006748
id_139826406459664	8.92988983	48.91550787	5.45984951
id_139826406461200	31.48435803	29.13184347	24.65127238
id_139826406462800	33.41359492	9.881149299	3.736896996
id_139826406464336	9.31545258	3.049995538	4.866015751
id_139826406465872	90.12991649	5.765747418	5.68E-14
id_139826406467472	52.41301259	24.89144426	5.812141168
id_139826406469008	31.73865183	21.36195996	2.121320344
id_139826406470608	36.83967707	8.165308812	12.83406749
id_139826406472144	35.05300184	5.911150228	5.000000358
id_139826406539344	23.12666996	0.732589827	2.886751346
id_139826406540880	0.152712439	14.92716198	3.380497848
id_139826406542480	20.98673301	22.52099844	4.234139328
id_139826406544080	6.021236359	4.734314874	1.399275897
id_139826406545680	6.997170769	28.56994111	6.774049438
id_139826406547280	1.76584514	2	6.119653169
id_139826406548816	21.20411122	4.170575149	3.922495523
id_139826406550416	9.908847428	6.4466715	6.321556326
id_139826406551952	7.140034825	3.103167445	10.95994451
id_139826406553552	25.52222795	7.298999322	2.48092055
id_139826406555088	26.89911084	9.113167726	19.23817145
id_139826406589520	36.44372595	6.350852961	4.265097191
id_139826406591120	22.43318146	4.525911745	5.935754877
id_139826406592656	28.92888518	2.005563054	3.941340011
id_139826406594256	21.70856237	7.942213643	12.82983424
id_139826406595856	21.93952326	7.187905507	8.425963212
id_139826406597456	36.89257709	10.03946423	0.357931624
id_139826406599056	9.764863231	1.946338961	0.407499764
id_139826406600656	7.533344681	2.649496162	2.828427125
id_139826406602256	37.76072591	10.172655	6.452429405
id_139826406603856	35.743498	14.17523953	2.336877339
id_139826406638288	50.83784875	8.565485657	3.7365335
id_139826406639888	61.09276484	12.09257148	5.599206978
id_139826406641488	11.38994801	4.327103005	3.515494471
id_139826406643088	6.481772757	2.329718898	3.513773212
id_139826406644688	4.688239161	9.948908463	4.041451884
id_139826406646288	5.206409704	18.68369616	11.87797555
id_139826406647888	4.787730625	6.054530484	6.038226096
id_139826406649488	3.401311083	11.83151522	14.88751132
id_139826406651088	60.54463645	3.922483476	4.804331691
id_139826406652624	13.29784934	9.751784546	2.828427125
id_139826406670672	32.00622806	2.900014941	7.614428654
id_139826406672272	71.31402658	27.77740326	7.910140388
id_139826406673872	96.75684392	26.95637431	11.66838371
id_139826406675472	23.93118751	3.951739493	2.484324191
id_139826406677072	4.424497507	13.26670023	2.121320344
id_139826406678672	30.62719098	3.393665799	4.094215653
id_139826406680272	8.842442559	5.771953275	3.438769405
id_139826406681872	9.325772374	3.535533906	4.833600544
id_139826406683472	18.01905943	9.097191521	2.950926603
id_139826406685008	21.13688484	14.94754493	3
id_139826406686608	47.1197391	4.016985135	4.068182327
id_139826406721040	30.79428076	10.85010268	0.333398357
id_139826406722640	26.41245555	10.02805653	6.673077884
id_139826406724240	10.72258218	18.28526601	3.684796224
id_139826406725840	36.08709977	4.265785555	2.888090569
id_139826406727440	29.70591908	1.947292422	5.13408541
id_139826406729040	53.61831299	21.44344479	3.669424718
id_139826406730640	3.891449146	7.273646156	3.610083852
id_139826406732240	89.8795324	45.18798995	4.095253075
id_139826406733840	8.058821011	19.52715406	4.551709722
id_139826406735440	6.000088209	16.84415146	6.261635719
id_139826406786256	31.55639903	10.49897188	3.324730452
id_139826406787856	14.50382169	3.593852131	3.520866222
id_139826406789456	29.69466773	1.645665224	9.073584618
id_139826406791056	45.47945211	9.303139022	2.121320344
id_139826406792656	10.66596691	38.24151572	24.1199891
id_139826406794256	17.62598368	1	2.07120877
id_139826406795856	6.349846081	4.28389721	3.308217717
id_139826406797456	44.80017696	32.37540915	1.493204133
id_139826406799056	26.96489611	4.330473937	3.419205699
id_139826406800656	17.37889003	16.26345597	5.808204312
id_139826406818704	12.93453241	13.55858112	3.378517948
id_139826406820304	16.99824246	19	2.828427125
id_139826406821904	29.89722548	6.573446963	4.827807857
id_139826406823440	36.60328189	27.00053047	3.07024653
id_139826406825040	24.18558748	8.369567465	2
id_139826406826576	13.21938007	28.1224381	22.42908868
id_139826406828176	2.832617996	3.239458622	3.459078787
id_139826406829776	9.812084378	4.618802154	3.205099111
id_139826406831376	16.18723834	3.277815587	18.87832706
id_139826406832976	9.816948146	10.44256542	3.746734106
id_139826406867408	0.217493197	10.17991173	2.971308237
id_139826406869008	13.82440927	12.93340029	4.051420702
id_139826406870608	28.62180021	29.69056396	3.682018053
id_139826406872208	18.08523038	7.83550039	2.21660606
id_139826406873808	29.15762086	33.3283257	3.617146823
id_139826406875408	5.103094722	8.382096063	2.778659796
id_139826406876944	29.81426588	36.54308093	10.33736884
id_139826406878480	20.50761686	7.907005733	1.766154602
id_139826406880016	10.87396205	4.950281843	3.789419305
id_139826406881552	34.57385363	46.89733589	3.147510729
id_139826406883152	29.58457624	2.943392313	8.106354347
id_139826406950352	11.06564665	5.754596232	3.637070743
id_139826406951824	37.58721832	2.899726642	2.828427125
id_139826406953424	0	36.06765173	22.19031946
id_139826406955024	53.53720255	54.2703785	4.196030169
id_139826406956624	36.03100187	4.949747468	6.593990294
id_139826406958160	21.40598964	7.660614847	4.422156902
id_139826406959696	14.1186356	9.202402194	6.350852961
id_139826406961232	47.25164215	4.995613619	4.242640687
id_139826406962832	22.99076285	19.00906308	22.5166605
id_139826406964368	2.908375642	36.06244945	4.794316579
