# Supplementary material
Source: Research Square preprint supplement (doi:10.21203/rs.3.rs-8743768/v1)
Supplement: Supplementary file 2 [file 8cb704ff701c5a06f842706c.xlsx]

## Sheet: Gastrotrich ribosomal seq
Table S2 Contaminants
Gastrotrich ribosomal sequences
>LEG_metagenome_18S_rRNA_NODE_723_length_18455_cov_25.661883	TCTGGTTGATCCTGCCAGTTGTCACATGCTTGTCTCAAAGATTAAGCCATGCATGTCTAAGTACACACTGTGGCACAGTGAAACCGCGAATGGCTCATTAAATCAGTTATGGTTTATTAGATCGTGCGTTCTTATGTGGATAACTGTGGTAATTCTAGAGCTAATACATGCAACTGGCCCTAACTTAACGGAGGGGCGCTTTTATTAGATCAAAATCAATCAGACTTCGGTCTGTATTTGTGATGACTCTGGATAACTTTGTGCCGACCGCATGGCCTTGCGCCGGCGGCGTATCTTTCAAATGTCTGCCCTATCAACTTTCGATGGTAGGTGACATGCCTACCATGGTTGTAACGGGTAACGGAGAATCAGGGTTCGATTCCGGAGAGGGAGCCTGAG…
>LEG_trans_GASTRO_18S_1	TGCCAGTTGTCACATGCTTGTCTCAAAGATTAAGCCATGCATGTCTAAGTACACACTGTGGCACAGTGAAACCGCAAATGGCTCATTAAATCAGTTATGGTTTATTAGATCGTGCGTTCTTATGTGGATAACTGTGGTAATTCTAGAGCTAATACATGCAACTGGCCCTAACTTAACGGAGGGGCGCTTTTATTAGATCAAAATCAATCAGACTTCGGTCTGTAATTGTGATGACTCTGGATAACTTTGTGCCGACCGCATGGCCTTGCGCCGGCGGCGTATCTTTCAAATGTCTGCCCTATCAACTTTCGATGGTAGGTGACATRCCTACCATGGTTGTMACGGGTAACGGAGAATCAGGGTTCGATTCCGGAGAGGGAGCCTGAGAAACGGCTACCA…
>LEG_trans_GASTRO_18S_2	TGGTTGTAACGGGTAACGGAGAATCAGGGTTCGATTCCGGAGAGGGAGCCTGAGAAACGGCTACCACATCCAAGGTAGGCAGCAGGCGCGCAAATTACCCACTCCCGGCACGGGGAGGTAGTGACGAAAAATAACAATGCTGGGCTTCAAGTCCGGTAATTGGAATGAGTACACTTTAAATCCTTTAACGAGGATCTAGTGGAGGGCAAGTCTGGTGCCAGCAGCCGCGGTAATTCCAGCTCCACGAGCATGTACGTAAGTTGTTGCAGTTAAAAAGCTCGTAGTTGGATCTCAGGCTTGTGGCCGGTGGTCCGCTCGATACGGGTGTGCACTGCCGTGCCCGGCCTACGTCTGGTTTAAAAGTCTATAGTGCTCTTAACCGGGTGCTATAGAATGCCA…
>LEG_trans_GASTRO_18S_3	TGGTTGTAACGGGTAACGGAGAATTAGGGTTCGATTCCGGAGAGGGAGCCTGAGAAACGGCTACCACATCCAAGGAAGGCAGCAGGCGCGCAAATTACCCACTCCCGGCACGGGGAGGTAGTGACGAAAAATAACAATGCTGGGCTTCAAGTCCGGTAATTGGAATGAGTACACTTTAAATCCTTTAACGAGGATCTAGTGGAGGGCAAGTCTGGTGCCAGCAGCCGCGGTAATTCCAGCTCCACGAGCATGTACGTAAGTTGTTGCAGTTAAAAAGCTCGTAGTTGGATCTCAGGCTTGTGGCCGGTGGTCCGCTCGATACGGGTGTGCACTGCCGTGCCCGGCCTACGTCTGGTTTAAAAGTCTATAGTGCTCTTAACCGGGTGCTATAGAATGCCA…
>LEG_trans_GASTRO_28S_A	AAATAGGAAAAGCCCATAGCCGAATTCTGCTGTCCTCGACGGCAGCTAGAAGTTGTGGCGTTGGGAACTGCCTTTTGTAACCGATCGGTCGGGCTACGCGACTCCTCTTGATTGTGGTTTGCCCATAGCAGGTGAAAGGCCTATAGCTTCGTAGCCTCGTGCAGAAGACCGGCGGTGATGGCAGTCCTTAGAGTCGGTTTGTTTGGGATTGCAGACCGAAGTAGGTGGTAAACTCCACCTAAGGCTAAATACGATCGCGAGTCCGATAGCGCACAAGTACCGTGAGGGACAGTTGAAAAGAACTTTGAAGAGAGAGTTCAAAGTACGTGAAACCGTTCAGAGGTAAACGGGTAGAAAGTCGAATTGAGAGCTGACAATCAAGCCGTAACCGTGTCGGCA…
>LEG_trans_GASTRO_28S_B	GCACAAGTACCGTGAGGGACAGTTGAAAAGAACTTTGAAGAGAGAGTTCAAAGTACGTGAAACCGTTCAGAGGTAAACGGGTAGAAAGTCGAATTGAAAGTTGACAATCAAGCCGTTGGTTAAGTCTGAGTTGGGCTGGTAGTACGTTAAAGGCTGCCAGTTTGCTTGTAAGGCTGGCTACGGTTGTACTTGTTGACTTTGGATCGCCGCAACGGCAGTGTCTGACCGGCTGGCGTCAGCTCCTCTGGTTGATGAGGATCCGTATGGGTCTTTTTTCATCGGCACATGGGCAGGCGTCCCGCGTACACAGCACAGTCGCTACATAAAGCAGTTTAAGCGTTCCAACTGGTTGTCGTTCGTTTTGTATTGGCAGTCTGATCTTAAACAAGTTCACCTGTT…
>LEG_trans_GASTRO_28S_C	CCGGCGGTGATGGCAGTCCTTAGAGTCGGTTTGTTTGGGATTGCAGACCGAAGTAGGTGGTAAACTCCACCTAAGGCTAAATACGATCGCGAGTCCGATAGCGCACAAGTACCGTGAGGGACAGTTGAAAAGAACTTTGAAGAGAGAGTTCAAAGTACGTGAAACCGTTCAGAGGTAAACGGGTAGAAAGTCGAATTTAAAGTTGACAATCAAACCGTTGGTTTAGTCTGAGTTGGGCTGGCAGCACGTTAAAGGTTGCCAGTTTACTTGTAAGGCTAACTACGGTTGTATTTGTTGATTTTGGATCGCCGCGACGGCAGTGTCCTGACCGGCTGGCGTCTATTCCTCTGGTCAATGTAGATCCGTATGGGTCTTTAAATGTTGGCACATGGATAGGCG…
>LEG_trans_GASTRO_28S_D	GAAGACCGGCGGTGATGGCAGTCCTTAGAGTCGGTTTGTTTGGGATTGCAGACCGAAGTAGGTGGTAAACTCCACCTAAGGCTAAATACGATCGCGAGTCCGATAGCGCACAAGTACCGTGAGGGACAGTTGAAAAGAACTTTGAAGAGAGAGTTCAAAGTACGTGAAACCGTTCAGAGGTAAACGGGTAGAAAGTCGAATTGAAGGTTGACAATCAAGCCGTTGGCTAAGTCTGAGTTGGGCTGGTAGCACGTTAAAGGCTGCCAGTTTGCTCGTATGGCTGGCTACGGTTGTACTTGTTGGCCTTGGATCGCCGCGACGGCAGTGACTGACCGGCTGGCGTCAGCTCCTCTGGTCGACGTAGATCCGTATGGGTCTCAACATCGGCACATGGGCAGG…

## Sheet: Contaminant BINs
Contaminant BINs
Name	Completeness	Contamination	Coding_Density	Contig_N50	Average_Gene_Length	Genome_Size	GC_Content	CDS	Contigs	Max_Contig_Length	org
bin3	51.75%	9.82%	0.851	10001	267.9	1419726	0.34%	1507	201	51774	Trichorickettsia related
bin4	59.41%	0.36%	0.871	12941	267.5	757214	0.32%	825	104	48567	Tisiphia sp.
