# Supplementary material
Source: Research Square preprint supplement (doi:10.21203/rs.3.rs-8743768/v1)
Supplement: Supplementary file 3 [file aea2c15c4c92c2335878f2b7.xlsx]

## Sheet: Transcripts annotated 
methanogenesis_modules	contig	seed_ortholog	evalue	score	eggNOG_OGs	max_annot_lvl	COG_category	Description	Preferred_name	GOs	EC	KEGG_ko	KEGG_Pathway	KEGG_Module	KEGG_Reaction	KEGG_rclass	BRITE	KEGG_TC	CAZy	BiGG_Reaction	PFAMs
Formylmethanofuran dehydrogenase (Fmd/Fwd)	NODE_1189_length_2538_cov_3_746856_g716_i0_1	386456.JQKN01000009_gene1138	6.379999999999999e-69	220.0	COG1029@1|root,arCOG01499@2157|Archaea,2XTPW@28890|Euryarchaeota,23PCR@183925|Methanobacteria	183925|Methanobacteria	C	Formylmethanofuran dehydrogenase, subunit B	fwdB	-	1.2.7.12	ko:K00201	ko00680,ko01100,ko01120,ko01200,map00680,map01100,map01120,map01200	M00567	R03015,R08060	RC00197,RC00323	ko00000,ko00001,ko00002,ko01000	-	-	-	Molybdopterin
Formylmethanofuran dehydrogenase (Fmd/Fwd)	NODE_1189_length_2538_cov_3_746856_g716_i0_2	386456.JQKN01000009_gene1138	2.0699999999999997e-229	638.0	COG1029@1|root,arCOG01499@2157|Archaea,2XTPW@28890|Euryarchaeota,23PCR@183925|Methanobacteria	183925|Methanobacteria	C	Formylmethanofuran dehydrogenase, subunit B	fwdB	-	1.2.7.12	ko:K00201	ko00680,ko01100,ko01120,ko01200,map00680,map01100,map01120,map01200	M00567	R03015,R08060	RC00197,RC00323	ko00000,ko00001,ko00002,ko01000	-	-	-	Molybdopterin
Formylmethanofuran dehydrogenase (Fmd/Fwd)	NODE_1189_length_2538_cov_3_746856_g716_i0_3	386456.JQKN01000009_gene1139	1.22e-257	716.0	COG1229@1|root,arCOG04461@2157|Archaea,2XV5V@28890|Euryarchaeota,23PHQ@183925|Methanobacteria	183925|Methanobacteria	C	formylmethanofuran dehydrogenase, subunit A	fwdA	-	1.2.7.12	ko:K00200	ko00680,ko01100,ko01120,ko01130,ko01200,map00680,map01100,map01120,map01130,map01200	M00567	R03015,R08060	RC00197,RC00323	ko00000,ko00001,ko00002,ko01000	-	-	-	Amidohydro_3
Formylmethanofuran dehydrogenase (Fmd/Fwd)	NODE_4204_length_1131_cov_2_774102_g3415_i0_1	224719.Abm4_0139	1.9400000000000002e-35	121.0	COG1145@1|root,arCOG00292@2157|Archaea,2XZVJ@28890|Euryarchaeota,23P6X@183925|Methanobacteria	183925|Methanobacteria	C	4Fe-4S binding domain	fwdG	-	-	ko:K11260	ko00680,ko01100,ko01120,ko01200,map00680,map01100,map01120,map01200	M00567	R03015,R08060,R11743	RC00197,RC00323	ko00000,ko00001,ko00002	-	-	-	Fer4
Formylmethanofuran dehydrogenase (Fmd/Fwd)	NODE_4204_length_1131_cov_2_774102_g3415_i0_2	877455.Metbo_2513	1.57e-35	133.0	COG1145@1|root,arCOG02180@2157|Archaea,2XV84@28890|Euryarchaeota,23PCF@183925|Methanobacteria	183925|Methanobacteria	C	4Fe-4S dicluster domain	fwdF	-	-	ko:K00205	ko00680,ko01100,ko01120,ko01200,map00680,map01100,map01120,map01200	M00567	R03015,R08060,R11743	RC00197,RC00323	ko00000,ko00001,ko00002	-	-	-	Fer4
Formylmethanofuran dehydrogenase (Fmd/Fwd)	NODE_4204_length_1131_cov_2_774102_g3415_i0_3	877455.Metbo_2514	2.02e-59	187.0	COG1146@1|root,arCOG04891@2157|Archaea,2Y0QJ@28890|Euryarchaeota,23PKS@183925|Methanobacteria	183925|Methanobacteria	C	Helix-turn-helix	fwdH	-	-	ko:K00204	ko00680,ko01100,ko01120,ko01200,map00680,map01100,map01120,map01200	M00567	R03015,R08060,R11743	RC00197,RC00323	ko00000,ko00001,ko00002	-	-	-	Fer4,HTH_3
Formyltransferase (Ftr)	NODE_767_length_4109_cov_10_240089_g422_i0_6	192952.MM_1321	7.83e-92	278.0	COG2037@1|root,arCOG02695@2157|Archaea,2XT8E@28890|Euryarchaeota,2N97E@224756|Methanomicrobia	224756|Methanomicrobia	H	Catalyzes the reversible transfer of a formyl group from formylmethanofuran (formyl-MFR) to tetrahydromethanopterin (H(4)MPT) so as to produce 5-formyl tetrahydromethanopterin (5- formyl-H(4)MPT) and methanofuran (MFR)	ftr	GO:0005575,GO:0005622,GO:0005623,GO:0005737,GO:0044424,GO:0044464	2.3.1.101	ko:K00672	ko00680,ko01100,ko01120,ko01200,map00680,map01100,map01120,map01200	M00567	R03390	RC00197,RC00870,RC02881	ko00000,ko00001,ko00002,ko01000	-	-	-	FTR,FTR_C
Formyltransferase (Ftr)	NODE_770_length_4070_cov_10_249437_g422_i1_7	192952.MM_1321	7.83e-92	278.0	COG2037@1|root,arCOG02695@2157|Archaea,2XT8E@28890|Euryarchaeota,2N97E@224756|Methanomicrobia	224756|Methanomicrobia	H	Catalyzes the reversible transfer of a formyl group from formylmethanofuran (formyl-MFR) to tetrahydromethanopterin (H(4)MPT) so as to produce 5-formyl tetrahydromethanopterin (5- formyl-H(4)MPT) and methanofuran (MFR)	ftr	GO:0005575,GO:0005622,GO:0005623,GO:0005737,GO:0044424,GO:0044464	2.3.1.101	ko:K00672	ko00680,ko01100,ko01120,ko01200,map00680,map01100,map01120,map01200	M00567	R03390	RC00197,RC00870,RC02881	ko00000,ko00001,ko00002,ko01000	-	-	-	FTR,FTR_C
Formyltransferase (Ftr)	NODE_5505_length_966_cov_1_994401_g4649_i0_2	386456.JQKN01000003_gene420	2.69e-38	139.0	COG2037@1|root,arCOG02695@2157|Archaea,2XUV2@28890|Euryarchaeota,23NJN@183925|Methanobacteria	183925|Methanobacteria	C	Formylmethanofuran-tetrahydromethanopterin formyltransferase	ftr1	-	2.3.1.101	ko:K00672	ko00680,ko01100,ko01120,ko01200,map00680,map01100,map01120,map01200	M00567	R03390	RC00197,RC00870,RC02881	ko00000,ko00001,ko00002,ko01000	-	-	-	FTR,FTR_C
H4MPT C1 conversions (Mch/Mtd/Mer)	NODE_9534_length_665_cov_2_533784_g8460_i0_1	386456.JQKN01000011_gene745	8.48e-121	354.0	COG2141@1|root,arCOG02410@2157|Archaea,2XTN9@28890|Euryarchaeota,23NQ0@183925|Methanobacteria	183925|Methanobacteria	C	Catalyzes the reversible reduction of methylene-H(4)MPT to methyl-H(4)MPT	mer	-	1.5.98.2	ko:K00320	ko00680,ko01100,ko01120,ko01200,map00680,map01100,map01120,map01200	M00567	R04464	RC01607	ko00000,ko00001,ko00002,ko01000	-	-	-	Bac_luciferase
Heterodisulfide reductase / electron bifurcation (Hdr/Mvh)	NODE_1351_length_2300_cov_6_207903_g842_i0_2	386456.JQKN01000013_gene3055	9.57e-198	551.0	COG1941@1|root,arCOG02472@2157|Archaea,2XV6A@28890|Euryarchaeota,23NKE@183925|Methanobacteria	183925|Methanobacteria	C	NADH ubiquinone oxidoreductase, 20 Kd subunit	mvhG	-	1.8.98.5	ko:K14128	ko00680,map00680	-	R00019,R11943	RC00011	ko00000,ko00001,ko01000	-	-	-	Oxidored_q6
Hydrogenases (NiFe / F420 / Eha/Ehb / Frh/Vhu/Vhc)	NODE_1351_length_2300_cov_6_207903_g842_i0_3	386456.JQKN01000013_gene3054	1.66e-100	291.0	COG1908@1|root,arCOG02475@2157|Archaea,2XY1E@28890|Euryarchaeota,23NY4@183925|Methanobacteria	183925|Methanobacteria	C	PFAM Methyl-viologen-reducing hydrogenase, delta subunit	mvhD1	-	1.8.98.5,1.8.98.6	ko:K14127	ko00680,map00680	-	R00019,R11943,R11944	RC00011	ko00000,ko00001,ko01000	-	-	-	FlpD
Hydrogenases (NiFe / F420 / Eha/Ehb / Frh/Vhu/Vhc)	NODE_902_length_3391_cov_16_397830_g499_i0_1	386456.JQKN01000012_gene1019	5.42e-275	754.0	COG0374@1|root,arCOG01549@2157|Archaea,2XSXP@28890|Euryarchaeota,23NW4@183925|Methanobacteria	183925|Methanobacteria	C	Belongs to the NiFe NiFeSe hydrogenase large subunit family	frhA	-	1.12.98.1	ko:K00440	ko00680,ko01100,ko01120,map00680,map01100,map01120	-	R03025	RC02628	ko00000,ko00001,ko01000	-	-	-	NiFeSe_Hases
Hydrogenases (NiFe / F420 / Eha/Ehb / Frh/Vhu/Vhc)	NODE_902_length_3391_cov_16_397830_g499_i0_2	386456.JQKN01000012_gene1020	9.03e-101	293.0	COG0680@1|root,arCOG04429@2157|Archaea,2XY3C@28890|Euryarchaeota,23P27@183925|Methanobacteria	183925|Methanobacteria	C	Coenzyme F420-reducing hydrogenase, delta subunit	frhD	-	-	ko:K00442	ko00680,ko01100,ko01120,map00680,map01100,map01120	-	R03025	RC02628	ko00000,ko00001	-	-	-	HycI
Hydrogenases (NiFe / F420 / Eha/Ehb / Frh/Vhu/Vhc)	NODE_902_length_3391_cov_16_397830_g499_i0_3	386456.JQKN01000012_gene1021	3.8e-161	455.0	COG1941@1|root,arCOG02473@2157|Archaea,2XUXH@28890|Euryarchaeota,23NTB@183925|Methanobacteria	183925|Methanobacteria	C	TIGRFAM Coenzyme F420 hydrogenase, subunit gamma	frhG	-	1.12.98.1	ko:K00443	ko00680,ko01100,ko01120,map00680,map01100,map01120	-	R03025	RC02628	ko00000,ko00001,ko01000	-	-	-	Fer4,Fer4_4,Oxidored_q6
Hydrogenases (NiFe / F420 / Eha/Ehb / Frh/Vhu/Vhc)	NODE_902_length_3391_cov_16_397830_g499_i0_4	386456.JQKN01000012_gene1022	9.48e-181	505.0	COG1035@1|root,arCOG02651@2157|Archaea,2XUH6@28890|Euryarchaeota,23NWU@183925|Methanobacteria	183925|Methanobacteria	C	PFAM Coenzyme F420 hydrogenase dehydrogenase beta subunit	frhB1	-	1.12.98.1	ko:K00441	ko00680,ko01100,ko01120,map00680,map01100,map01120	-	R03025	RC02628	ko00000,ko00001,ko01000	-	-	-	FrhB_FdhB_C,FrhB_FdhB_N
Hydrogenases (NiFe / F420 / Eha/Ehb / Frh/Vhu/Vhc)	NODE_2146_length_1662_cov_14_848962_g1520_i0_1	572546.Arcpr_1589	1.51e-68	226.0	COG1035@1|root,arCOG02650@2157|Archaea,2XVXF@28890|Euryarchaeota,2462X@183980|Archaeoglobi	28890|Euryarchaeota	C	PFAM Coenzyme F420 hydrogenase dehydrogenase beta subunit	-	-	1.1.98.4,1.12.98.1	ko:K00441,ko:K22174	ko00680,ko01100,ko01120,map00680,map01100,map01120	-	R03025	RC02628	ko00000,ko00001,ko01000	-	-	-	Fer4_21,FrhB_FdhB_C,FrhB_FdhB_N
Hydrogenases (NiFe / F420 / Eha/Ehb / Frh/Vhu/Vhc)	NODE_6081_length_907_cov_3_458034_g5195_i0_1	386456.JQKN01000008_gene1463	4.1e-06	48.5	COG1340@1|root,arCOG01159@2157|Archaea,2Y87Y@28890|Euryarchaeota,23PX9@183925|Methanobacteria	183925|Methanobacteria	S	haloacid dehalogenase-like hydrolase	-	-	3.1.3.3	ko:K01079	ko00260,ko00680,ko01100,ko01120,ko01130,ko01200,ko01230,map00260,map00680,map01100,map01120,map01130,map01200,map01230	M00020	R00582	RC00017	ko00000,ko00001,ko00002,ko01000,ko01009	-	-	-	HAD
Hydrogenases (NiFe / F420 / Eha/Ehb / Frh/Vhu/Vhc)	NODE_6081_length_907_cov_3_458034_g5195_i0_2	386456.JQKN01000008_gene1463	1.29e-58	196.0	COG1340@1|root,arCOG01159@2157|Archaea,2Y87Y@28890|Euryarchaeota,23PX9@183925|Methanobacteria	183925|Methanobacteria	S	haloacid dehalogenase-like hydrolase	-	-	3.1.3.3	ko:K01079	ko00260,ko00680,ko01100,ko01120,ko01130,ko01200,ko01230,map00260,map00680,map01100,map01120,map01130,map01200,map01230	M00020	R00582	RC00017	ko00000,ko00001,ko00002,ko01000,ko01009	-	-	-	HAD
Methyl-coenzyme M reductase (McrABG/D)	NODE_535_length_5851_cov_45_745241_g289_i0_1	386456.JQKN01000013_gene3030	1.63e-282	776.0	COG4054@1|root,arCOG04860@2157|Archaea,2XTPD@28890|Euryarchaeota,23PH5@183925|Methanobacteria	183925|Methanobacteria	H	methyl-coenzyme M reductase, beta subunit	mcrB	-	2.8.4.1	ko:K00401	ko00680,ko01100,ko01120,ko01200,map00680,map01100,map01120,map01200	M00356,M00357,M00563,M00567	R04541	RC00011,RC01542	ko00000,ko00001,ko00002,ko01000	-	-	-	MCR_beta,MCR_beta_N
Methyl-coenzyme M reductase (McrABG/D)	NODE_535_length_5851_cov_45_745241_g289_i0_2	386456.JQKN01000013_gene3031	2.3300000000000002e-85	253.0	COG4055@1|root,arCOG04859@2157|Archaea,2Y4A7@28890|Euryarchaeota,23PQM@183925|Methanobacteria	183925|Methanobacteria	H	Methyl-coenzyme M reductase	mcrD	-	-	ko:K03422	ko00680,ko01100,ko01120,map00680,map01100,map01120	-	-	-	ko00000,ko00001	-	-	-	MCR_D
Methyl-coenzyme M reductase (McrABG/D)	NODE_535_length_5851_cov_45_745241_g289_i0_3	386456.JQKN01000013_gene3032	5.1e-132	375.0	COG4056@1|root,arCOG03225@2157|Archaea,2XW32@28890|Euryarchaeota,23NZ6@183925|Methanobacteria	183925|Methanobacteria	H	Methyl-coenzyme M reductase	mcrC	-	-	ko:K03421	ko00680,ko01100,ko01120,map00680,map01100,map01120	-	-	-	ko00000,ko00001	-	-	-	-
Methyl-coenzyme M reductase (McrABG/D)	NODE_535_length_5851_cov_45_745241_g289_i0_4	386456.JQKN01000013_gene3033	7.52e-162	455.0	COG4057@1|root,arCOG04858@2157|Archaea,2XSVR@28890|Euryarchaeota,23PA4@183925|Methanobacteria	183925|Methanobacteria	H	methyl-coenzyme M reductase, gamma subunit	mcrG	-	2.8.4.1	ko:K00402	ko00680,ko01100,ko01120,ko01200,map00680,map01100,map01120,map01200	M00356,M00357,M00563,M00567	R04541	RC00011,RC01542	ko00000,ko00001,ko00002,ko01000	-	-	-	MCR_gamma
Methyl-coenzyme M reductase (McrABG/D)	NODE_535_length_5851_cov_45_745241_g289_i0_5	386456.JQKN01000013_gene3034	0.0	993.0	COG4058@1|root,arCOG04857@2157|Archaea,2XTF8@28890|Euryarchaeota,23PD2@183925|Methanobacteria	183925|Methanobacteria	H	Reduction of methyl-coenzyme M (2-(methylthio) ethanesulfonic acid) with 7-mercaptoheptanoylthreonine phosphate to methane and a heterodisulfide	mcrA	-	2.8.4.1	ko:K00399	ko00680,ko01100,ko01120,ko01200,map00680,map01100,map01120,map01200	M00356,M00357,M00563,M00567	R04541	RC00011,RC01542	ko00000,ko00001,ko00002,ko01000	-	-	-	MCR_alpha,MCR_alpha_N
Methyl-coenzyme M reductase (McrABG/D)	NODE_918_length_3317_cov_3933_438964_g390_i1_1	192952.MM_1244	6.81e-30	117.0	COG4054@1|root,arCOG04860@2157|Archaea,2XTPD@28890|Euryarchaeota,2N9BX@224756|Methanomicrobia	224756|Methanomicrobia	H	PFAM Methyl-coenzyme M reductase, beta subunit	mcrB	-	2.8.4.1	ko:K00401	ko00680,ko01100,ko01120,ko01200,map00680,map01100,map01120,map01200	M00356,M00357,M00563,M00567	R04541	RC00011,RC01542	ko00000,ko00001,ko00002,ko01000	-	-	-	MCR_beta,MCR_beta_N
Methyl-coenzyme M reductase (McrABG/D)	NODE_918_length_3317_cov_3933_438964_g390_i1_2	192952.MM_1243	3.0599999999999995e-42	145.0	COG4055@1|root,arCOG04859@2157|Archaea,2XZ5V@28890|Euryarchaeota,2NBJT@224756|Methanomicrobia	224756|Methanomicrobia	H	Methyl-coenzyme M reductase operon protein D	mcrD	-	-	ko:K03422	ko00680,ko01100,ko01120,map00680,map01100,map01120	-	-	-	ko00000,ko00001	-	-	-	MCR_D
Methyl-coenzyme M reductase (McrABG/D)	NODE_918_length_3317_cov_3933_438964_g390_i1_3	192952.MM_1241	6.540000000000001e-116	339.0	COG4057@1|root,arCOG04858@2157|Archaea,2XSVR@28890|Euryarchaeota,2N92T@224756|Methanomicrobia	224756|Methanomicrobia	H	PFAM Methyl-coenzyme M reductase gamma subunit	mcrG	-	2.8.4.1	ko:K00402	ko00680,ko01100,ko01120,ko01200,map00680,map01100,map01120,map01200	M00356,M00357,M00563,M00567	R04541	RC00011,RC01542	ko00000,ko00001,ko00002,ko01000	-	-	-	MCR_gamma
Methyl-coenzyme M reductase (McrABG/D)	NODE_918_length_3317_cov_3933_438964_g390_i1_4	1041930.Mtc_0908	1.4700000000000001e-276	771.0	COG4058@1|root,arCOG04857@2157|Archaea,2XTF8@28890|Euryarchaeota,2N90K@224756|Methanomicrobia	224756|Methanomicrobia	H	Reduction of methyl-coenzyme M (2-(methylthio) ethanesulfonic acid) with 7-mercaptoheptanoylthreonine phosphate to methane and a heterodisulfide	mcrA	-	2.8.4.1	ko:K00399	ko00680,ko01100,ko01120,ko01200,map00680,map01100,map01120,map01200	M00356,M00357,M00563,M00567	R04541	RC00011,RC01542	ko00000,ko00001,ko00002,ko01000	-	-	-	MCR_alpha,MCR_alpha_N
Methyl-H4MPT:CoM methyltransferase (MtrABCDEFGH)	NODE_535_length_5851_cov_45_745241_g289_i0_6	1220534.B655_1095	1.62e-161	457.0	COG4059@1|root,arCOG04870@2157|Archaea,2XTGG@28890|Euryarchaeota,23NPM@183925|Methanobacteria	183925|Methanobacteria	H	Part of a complex that catalyzes the formation of methyl-coenzyme M and tetrahydromethanopterin from coenzyme M and methyl-tetrahydromethanopterin. This is an energy-conserving, sodium-ion translocating step	mtrE	-	2.1.1.86	ko:K00581	ko00680,ko01100,ko01120,ko01200,map00680,map01100,map01120,map01200	M00357,M00567	R04347	RC00035,RC00113,RC02892	ko00000,ko00001,ko00002,ko01000	-	-	-	MtrE
Methyl-H4MPT:CoM methyltransferase (MtrABCDEFGH)	NODE_970_length_3146_cov_11_908233_g549_i0_1	386456.JQKN01000013_gene3035	5.33e-38	135.0	COG4059@1|root,arCOG04870@2157|Archaea,2XTGG@28890|Euryarchaeota,23NPM@183925|Methanobacteria	183925|Methanobacteria	H	Part of a complex that catalyzes the formation of methyl-coenzyme M and tetrahydromethanopterin from coenzyme M and methyl-tetrahydromethanopterin. This is an energy-conserving, sodium-ion translocating step	mtrE	-	2.1.1.86	ko:K00581	ko00680,ko01100,ko01120,ko01200,map00680,map01100,map01120,map01200	M00357,M00567	R04347	RC00035,RC00113,RC02892	ko00000,ko00001,ko00002,ko01000	-	-	-	MtrE
Methyl-H4MPT:CoM methyltransferase (MtrABCDEFGH)	NODE_970_length_3146_cov_11_908233_g549_i0_2	386456.JQKN01000013_gene3036	1.2200000000000001e-123	357.0	COG4060@1|root,arCOG04869@2157|Archaea,2XWIA@28890|Euryarchaeota,23P19@183925|Methanobacteria	183925|Methanobacteria	H	Part of a complex that catalyzes the formation of methyl-coenzyme M and tetrahydromethanopterin from coenzyme M and methyl-tetrahydromethanopterin. This is an energy-conserving, sodium-ion translocating step	mtrD	-	2.1.1.86	ko:K00580	ko00680,ko01100,ko01120,ko01200,map00680,map01100,map01120,map01200	M00357,M00567	R04347	RC00035,RC00113,RC02892	ko00000,ko00001,ko00002,ko01000	-	-	-	MtrD
Methyl-H4MPT:CoM methyltransferase (MtrABCDEFGH)	NODE_970_length_3146_cov_11_908233_g549_i0_3	877455.Metbo_0356	1.01e-123	360.0	COG4061@1|root,arCOG04868@2157|Archaea,2XYI9@28890|Euryarchaeota,23P45@183925|Methanobacteria	183925|Methanobacteria	H	Part of a complex that catalyzes the formation of methyl-coenzyme M and tetrahydromethanopterin from coenzyme M and methyl-tetrahydromethanopterin. This is an energy-conserving, sodium-ion translocating step	mtrC	-	2.1.1.86	ko:K00579	ko00680,ko01100,ko01120,ko01200,map00680,map01100,map01120,map01200	M00357,M00567	R04347	RC00035,RC00113,RC02892	ko00000,ko00001,ko00002,ko01000	-	-	-	MtrC
Methyl-H4MPT:CoM methyltransferase (MtrABCDEFGH)	NODE_970_length_3146_cov_11_908233_g549_i0_4	1220534.B655_1098	7.52e-51	162.0	COG4062@1|root,arCOG04867@2157|Archaea,2Y1G5@28890|Euryarchaeota,23P8S@183925|Methanobacteria	183925|Methanobacteria	H	Part of a complex that catalyzes the formation of methyl-coenzyme M and tetrahydromethanopterin from coenzyme M and methyl-tetrahydromethanopterin. This is an energy-conserving, sodium-ion translocating step	mtrB	-	2.1.1.86	ko:K00578	ko00680,ko01100,ko01120,ko01200,map00680,map01100,map01120,map01200	M00357,M00567	R04347	RC00035,RC00113,RC02892	ko00000,ko00001,ko00002,ko01000	-	-	-	MtrB
Methyl-H4MPT:CoM methyltransferase (MtrABCDEFGH)	NODE_970_length_3146_cov_11_908233_g549_i0_5	386456.JQKN01000013_gene3039	1.1e-146	416.0	COG4063@1|root,arCOG03221@2157|Archaea,2XWSE@28890|Euryarchaeota,23PC8@183925|Methanobacteria	183925|Methanobacteria	H	Part of a complex that catalyzes the formation of methyl-coenzyme M and tetrahydromethanopterin from coenzyme M and methyl-tetrahydromethanopterin. This is an energy-conserving, sodium-ion translocating step	mtrA	-	2.1.1.86	ko:K00577	ko00680,ko01100,ko01120,ko01200,map00680,map01100,map01120,map01200	M00357,M00567	R04347	RC00035,RC00113,RC02892	ko00000,ko00001,ko00002,ko01000	-	-	-	MtrA
Methyl-H4MPT:CoM methyltransferase (MtrABCDEFGH)	NODE_970_length_3146_cov_11_908233_g549_i0_6	1220534.B655_1100	2.3e-32	113.0	COG4218@1|root,arCOG03381@2157|Archaea,2Y1CV@28890|Euryarchaeota,23PUK@183925|Methanobacteria	183925|Methanobacteria	H	Part of a complex that catalyzes the formation of methyl-coenzyme M and tetrahydromethanopterin from coenzyme M and methyl-tetrahydromethanopterin. This is an energy-conserving, sodium-ion translocating step	mtrF	-	2.1.1.86	ko:K00582	ko00680,ko01100,ko01120,ko01200,map00680,map01100,map01120,map01200	M00357,M00567	R04347	RC00035,RC00113,RC02892	ko00000,ko00001,ko00002,ko01000	-	-	-	MtrF
Methyl-H4MPT:CoM methyltransferase (MtrABCDEFGH)	NODE_970_length_3146_cov_11_908233_g549_i0_7	1220534.B655_1101	1.55e-05	43.9	COG4064@1|root,arCOG03380@2157|Archaea,2Y18S@28890|Euryarchaeota,23P9U@183925|Methanobacteria	183925|Methanobacteria	H	Part of a complex that catalyzes the formation of methyl-coenzyme M and tetrahydromethanopterin from coenzyme M and methyl-tetrahydromethanopterin. This is an energy-conserving, sodium-ion translocating step	mtrG	-	2.1.1.86	ko:K00583	ko00680,ko01100,ko01120,ko01200,map00680,map01100,map01120,map01200	M00357,M00567	R04347	RC00035,RC00113,RC02892	ko00000,ko00001,ko00002,ko01000	-	-	-	MtrG
none	NODE_1351_length_2300_cov_6_207903_g842_i0_1	386456.JQKN01000013_gene3056	5.63e-187	528.0	COG0374@1|root,arCOG01549@2157|Archaea,2XTHE@28890|Euryarchaeota,23NPA@183925|Methanobacteria	183925|Methanobacteria	C	Belongs to the NiFe NiFeSe hydrogenase large subunit family	mvhA	-	1.8.98.5	ko:K14126	ko00680,map00680	-.1	R00019,R11943	RC00011	ko00000,ko00001,ko01000	-.2	-.3	-.4	NiFeSe_Hases
none	NODE_202_length_14943_cov_47_542233_g105_i0_2	351160.RCIX2574	3.8499999999999997e-45	153.0	COG1102@1|root,arCOG01037@2157|Archaea,2XWPB@28890|Euryarchaeota,2N9PR@224756|Methanomicrobia	224756|Methanomicrobia	F	Belongs to the cytidylate kinase family. Type 2 subfamily	cmk	-	2.7.4.25	ko:K00945	ko00240,ko01100,map00240,map01100	M00052	R00158,R00512,R01665	RC00002	ko00000,ko00001,ko00002,ko01000	-	-	-	Cytidylate_kin2
none	NODE_202_length_14943_cov_47_542233_g105_i0_3	192952.MM_2152	5.8399999999999996e-55	181.0	COG1422@1|root,arCOG02673@2157|Archaea,2XSX8@28890|Euryarchaeota,2N9PG@224756|Methanomicrobia	224756|Methanomicrobia	U	Integral membrane protein DUF106	-	-	-	-	-	-	-	-	-	-	-	-	DUF106
none	NODE_202_length_14943_cov_47_542233_g105_i0_4	1094980.Mpsy_1123	1.4999999999999998e-221	628.0	COG5253@1|root,arCOG04169@2157|Archaea,2XT9A@28890|Euryarchaeota,2N9AJ@224756|Methanomicrobia	224756|Methanomicrobia	U	The central subunit of the protein translocation channel SecYEG. Consists of two halves formed by TMs 1-5 and 6-10. These two domains form a lateral gate at the front which open onto the bilayer between TMs 2 and 7, and are clamped together by SecE at the back. The channel is closed by both a pore ring composed of hydrophobic SecY resides and a short helix (helix 2A) on the extracellular side of …	secY	-	-	ko:K03076	ko02024,ko03060,ko03070,map02024,map03060,map03070	M00335	-	-	ko00000,ko00001,ko00002,ko02044	3.A.5	-	-	Plug_translocon,SecY
none	NODE_202_length_14943_cov_47_542233_g105_i0_5	269797.Mbar_A0088	2.3400000000000002e-29	110.0	COG0200@1|root,arCOG00779@2157|Archaea,2XWM3@28890|Euryarchaeota,2N9U7@224756|Methanomicrobia	224756|Methanomicrobia	J	binds to the 23S rRNA	rpl15	-	-	ko:K02876	ko03010,map03010	M00178,M00179	-	-	br01610,ko00000,ko00001,ko00002,ko03011	-	-	-	Ribosomal_L27A
none	NODE_202_length_14943_cov_47_542233_g105_i0_6	192952.MM_2145	2.4499999999999998e-62	195.0	COG1841@1|root,arCOG04086@2157|Archaea,2XWGP@28890|Euryarchaeota,2N9JA@224756|Methanomicrobia	224756|Methanomicrobia	J	TIGRFAM ribosomal protein L30P	rpl30	-	-	ko:K02907	ko03010,map03010	M00178,M00179	-	-	br01610,ko00000,ko00001,ko00002,ko03011	-	-	-	Ribosomal_L30
none	NODE_202_length_14943_cov_47_542233_g105_i0_7	1094980.Mpsy_1126	5.29e-102	300.0	COG0098@1|root,arCOG04087@2157|Archaea,2XUQU@28890|Euryarchaeota,2N954@224756|Methanomicrobia	224756|Methanomicrobia	J	With S4 and S12 plays an important role in translational accuracy	rps5	-	-	ko:K02988	ko03010,map03010	M00178,M00179	-	-	br01610,ko00000,ko00001,ko00002,ko03011	-	-	-	Ribosomal_S5,Ribosomal_S5_C
none	NODE_202_length_14943_cov_47_542233_g105_i0_8	269797.Mbar_A0091	3.89e-56	181.0	COG0256@1|root,arCOG04088@2157|Archaea,2XTWT@28890|Euryarchaeota,2N9SW@224756|Methanomicrobia	224756|Methanomicrobia	J	This is one of the proteins that binds and probably mediates the attachment of the 5S RNA into the large ribosomal subunit, where it forms part of the central protuberance	rpl18	-	-	ko:K02881	ko03010,map03010	M00178,M00179	-	-	br01610,ko00000,ko00001,ko00002,ko03011	-	-	-	Ribosomal_L5e
none	NODE_202_length_14943_cov_47_542233_g105_i0_9	192952.MM_2142	4.56e-51	167.0	COG2147@1|root,arCOG04089@2157|Archaea,2XWU1@28890|Euryarchaeota,2N9QQ@224756|Methanomicrobia	224756|Methanomicrobia	J	binds to the 23S rRNA	rpl19e	-	-	ko:K02885	ko03010,map03010	M00177,M00179	-	-	br01610,ko00000,ko00001,ko00002,ko03011	-	-	-	Ribosomal_L19e
none	NODE_202_length_14943_cov_47_542233_g105_i0_10	1094980.Mpsy_1129	2.73e-35	125.0	COG1717@1|root,arCOG00781@2157|Archaea,2XSZ4@28890|Euryarchaeota,2N9TN@224756|Methanomicrobia	224756|Methanomicrobia	J	PFAM Ribosomal protein	rpl32e	-	-	ko:K02912	ko03010,map03010	M00177,M00179	-	-	br01610,ko00000,ko00001,ko00002,ko03011	-	-	-	Ribosomal_L32e
none	NODE_202_length_14943_cov_47_542233_g105_i0_11	1094980.Mpsy_1130	3.5e-64	202.0	COG0097@1|root,arCOG04090@2157|Archaea,2XTIS@28890|Euryarchaeota,2N9KP@224756|Methanomicrobia	224756|Methanomicrobia	J	This protein binds to the 23S rRNA, and is important in its secondary structure. It is located near the subunit interface in the base of the L7 L12 stalk, and near the tRNA binding site of the peptidyltransferase center	rpl6	-	-	ko:K02933	ko03010,map03010	M00178,M00179	-	-	br01610,ko00000,ko00001,ko00002,ko03011	-	-	-	Ribosomal_L6
none	NODE_202_length_14943_cov_47_542233_g105_i0_12	351160.RCIX2561	6.119999999999999e-61	190.0	COG0096@1|root,arCOG04091@2157|Archaea,2XWMU@28890|Euryarchaeota,2N9Q6@224756|Methanomicrobia	224756|Methanomicrobia	J	One of the primary rRNA binding proteins, it binds directly to 16S rRNA central domain where it helps coordinate assembly of the platform of the 30S subunit	rps8	-	-	ko:K02994	ko03010,map03010	M00178,M00179	-	-	br01610,ko00000,ko00001,ko00002,ko03011	-	-	-	Ribosomal_S8
none	NODE_202_length_14943_cov_47_542233_g105_i0_13	387631.Asulf_00114	3.7799999999999996e-24	91.3	COG0199@1|root,arCOG00782@2157|Archaea,2Y04R@28890|Euryarchaeota	28890|Euryarchaeota	J	Binds 16S rRNA, required for the assembly of 30S particles	rps14	-	-	ko:K02954	ko03010,map03010	M00178,M00179	-	-	br01610,ko00000,ko00001,ko00002,ko03011	-	-	-	Ribosomal_S14
none	NODE_202_length_14943_cov_47_542233_g105_i0_14	192952.MM_2137	2.16e-65	204.0	COG0094@1|root,arCOG04092@2157|Archaea,2XTRN@28890|Euryarchaeota,2N9KJ@224756|Methanomicrobia	224756|Methanomicrobia	J	This is 1 of the proteins that binds and probably mediates the attachment of the 5S RNA into the large ribosomal subunit, where it forms part of the central protuberance. In the 70S ribosome it contacts protein S13 of the 30S subunit (bridge B1b), connecting the 2 subunits	rpl5	-	-	ko:K02931	ko03010,map03010	M00178,M00179	-	-	br01610,ko00000,ko00001,ko00002,ko03011	-	-	-	Ribosomal_L5,Ribosomal_L5_C
none	NODE_202_length_14943_cov_47_542233_g105_i0_15	1041930.Mtc_1335	3.08e-79	244.0	COG1471@1|root,arCOG04093@2157|Archaea,2XT03@28890|Euryarchaeota,2N9HR@224756|Methanomicrobia	224756|Methanomicrobia	J	Belongs to the eukaryotic ribosomal protein eS4 family	rps4e	-	-	ko:K02987	ko03010,map03010	M00177,M00179	-	-	br01610,ko00000,ko00001,ko00002,ko03011	-	-	-	KOW,RS4NT,Ribosomal_S4e,S4
none	NODE_202_length_14943_cov_47_542233_g105_i0_16	323259.Mhun_2242	7.93e-41	138.0	COG0198@1|root,arCOG04094@2157|Archaea,2XXV4@28890|Euryarchaeota,2N9XR@224756|Methanomicrobia	224756|Methanomicrobia	J	One of two assembly initiator proteins, it binds directly to the 5'-end of the 23S rRNA, where it nucleates assembly of the 50S subunit	rpl24	-	-	ko:K02895	ko03010,map03010	M00178,M00179	-	-	br01610,ko00000,ko00001,ko00002,ko03011	-	-	-	KOW,Ribosomal_L26
none	NODE_202_length_14943_cov_47_542233_g105_i0_17	269797.Mbar_A0100	1.1399999999999999e-62	194.0	COG0093@1|root,arCOG04095@2157|Archaea,2XWM6@28890|Euryarchaeota,2N9SH@224756|Methanomicrobia	224756|Methanomicrobia	J	Binds to 23S rRNA. Forms part of two intersubunit bridges in the 70S ribosome	rpl14	-	-	ko:K02874	ko03010,map03010	M00178,M00179	-	-	br01610,ko00000,ko00001,ko00002,ko03011	-	-	-	Ribosomal_L14
none	NODE_202_length_14943_cov_47_542233_g105_i0_18	304371.MCP_2230	2.43e-48	156.0	COG0186@1|root,arCOG04096@2157|Archaea,2XYPE@28890|Euryarchaeota,2N9XI@224756|Methanomicrobia	224756|Methanomicrobia	J	One of the primary rRNA binding proteins, it binds specifically to the 5'-end of 16S ribosomal RNA	rps17	-	-	ko:K02961	ko03010,map03010	M00178,M00179	-	-	br01610,ko00000,ko00001,ko00002,ko03011	-	-	-	Ribosomal_S17
none	NODE_202_length_14943_cov_47_542233_g105_i0_19	339860.Msp_0900	1.78e-28	105.0	COG1588@1|root,arCOG00784@2157|Archaea,2Y0EN@28890|Euryarchaeota,23PQP@183925|Methanobacteria	183925|Methanobacteria	J	Part of ribonuclease P, a protein complex that generates mature tRNA molecules by cleaving their 5'-ends	rnp1	-	3.1.26.5	ko:K03538	ko03008,ko03013,map03008,map03013	-	-	-	ko00000,ko00001,ko01000,ko03009,ko03016,ko03029	-	-	-	UPF0086
none	NODE_202_length_14943_cov_47_542233_g105_i0_20	269797.Mbar_A0103	6.3e-19	79.3	COG0255@1|root,arCOG00785@2157|Archaea,2XZUQ@28890|Euryarchaeota,2NA4R@224756|Methanomicrobia	224756|Methanomicrobia	J	Belongs to the universal ribosomal protein uL29 family	rpl29	-	-	ko:K02904	ko03010,map03010	M00178,M00179	-	-	br01610,ko00000,ko00001,ko00002,ko03011	-	-	-	Ribosomal_L29
none	NODE_202_length_14943_cov_47_542233_g105_i0_21	1094980.Mpsy_1140	4.07e-94	286.0	COG0092@1|root,arCOG04097@2157|Archaea,2XTHR@28890|Euryarchaeota,2N95N@224756|Methanomicrobia	224756|Methanomicrobia	J	Binds the lower part of the 30S subunit head	rps3	-	-	ko:K02982	ko03010,map03010	M00178,M00179	-	-	br01610,ko00000,ko00001,ko00002,ko03011	-	-	-	KH_2,Ribosomal_S3_C
none	NODE_202_length_14943_cov_47_542233_g105_i0_22	1220534.B655_1955	7.19e-55	176.0	COG0091@1|root,arCOG04098@2157|Archaea,2XWGN@28890|Euryarchaeota,23P12@183925|Methanobacteria	183925|Methanobacteria	J	The globular domain of the protein is located near the polypeptide exit tunnel on the outside of the subunit, while an extended beta-hairpin is found that lines the wall of the exit tunnel in the center of the 70S ribosome	rpl22	-	-	ko:K02890	ko03010,map03010	M00178,M00179	-	-	br01610,ko00000,ko00001,ko00002,ko03011	-	-	-	Ribosomal_L22
none	NODE_202_length_14943_cov_47_542233_g105_i0_23	192952.MM_2128	1.5399999999999999e-55	177.0	COG0185@1|root,arCOG04099@2157|Archaea,2XWI9@28890|Euryarchaeota,2N9PW@224756|Methanomicrobia	224756|Methanomicrobia	J	Protein S19 forms a complex with S13 that binds strongly to the 16S ribosomal RNA	rps19p	-	-	ko:K02965	ko03010,map03010	M00178,M00179	-	-	br01610,ko00000,ko00001,ko00002,ko03011	-	-	-	Ribosomal_S19
none	NODE_202_length_14943_cov_47_542233_g105_i0_24	351160.RCIX2544	9.720000000000001e-122	352.0	COG0090@1|root,arCOG04067@2157|Archaea,2XTCS@28890|Euryarchaeota,2N99T@224756|Methanomicrobia	224756|Methanomicrobia	J	One of the primary rRNA binding proteins. Required for association of the 30S and 50S subunits to form the 70S ribosome, for tRNA binding and peptide bond formation. It has been suggested to have peptidyltransferase activity	rpl2	-	-	ko:K02886	ko03010,map03010	M00178,M00179	-	-	br01610,ko00000,ko00001,ko00002,ko03011	-	-	-	Ribosomal_L2,Ribosomal_L2_C
none	NODE_202_length_14943_cov_47_542233_g105_i0_25	351160.RCIX2543	6.84e-25	95.5	COG0089@1|root,arCOG04072@2157|Archaea,2XYPG@28890|Euryarchaeota,2N9ZC@224756|Methanomicrobia	224756|Methanomicrobia	J	Binds to 23S rRNA. One of the proteins that surrounds the polypeptide exit tunnel on the outside of the ribosome	rpl23	-	-	ko:K02892	ko03010,map03010	M00178,M00179	-	-	br01610,ko00000,ko00001,ko00002,ko03011	-	-	-	Ribosomal_L23
none	NODE_202_length_14943_cov_47_542233_g105_i0_26	192952.MM_2125	1.2e-108	320.0	COG0469@1|root,arCOG04071@2157|Archaea,2XTXX@28890|Euryarchaeota,2N9DG@224756|Methanomicrobia	224756|Methanomicrobia	J	One of the primary rRNA binding proteins, this protein initially binds near the 5'-end of the 23S rRNA. It is important during the early stages of 50S assembly. It makes multiple contacts with different domains of the 23S rRNA in the assembled 50S subunit and ribosome	rpl4	-	-	ko:K02930	ko03010,map03010	M00177,M00179	-	-	br01610,ko00000,ko00001,ko00002,ko03011	-	-	-	Ribosomal_L4
none	NODE_202_length_14943_cov_47_542233_g105_i0_27	521011.Mpal_0442	4.4e-133	389.0	COG0087@1|root,arCOG04070@2157|Archaea,2XT9B@28890|Euryarchaeota,2N98A@224756|Methanomicrobia	224756|Methanomicrobia	J	One of the primary rRNA binding proteins, it binds directly near the 3'-end of the 23S rRNA, where it nucleates assembly of the 50S subunit	rpl3	-	-	ko:K02906	ko03010,map03010	M00178,M00179	-	-	br01610,ko00000,ko00001,ko00002,ko03011	-	-	-	Ribosomal_L3
none	NODE_202_length_14943_cov_47_542233_g105_i0_28	304371.MCP_2219	9.72e-48	164.0	COG2106@1|root,arCOG04069@2157|Archaea,2XSZI@28890|Euryarchaeota	28890|Euryarchaeota	S	Putative RNA methyltransferase	-	-	-	ko:K09142	-	-	-	-	ko00000	-	-	-	Methyltrn_RNA_3
none	NODE_6589_length_863_cov_1_875949_g5683_i0_1	386456.JQKN01000001_gene2220	1.77e-86	257.0	COG4008@1|root,arCOG04853@2157|Archaea,2XX3S@28890|Euryarchaeota,23PIY@183925|Methanobacteria	183925|Methanobacteria	K	methanogenesis marker domain 9	-	-	-	-	-	-	-	-	-	-	-	-	-
none	NODE_6589_length_863_cov_1_875949_g5683_i0_2	386456.JQKN01000001_gene2219	1.5799999999999999e-55	178.0	COG1648@1|root,arCOG01044@2157|Archaea,2XWMY@28890|Euryarchaeota,23P2N@183925|Methanobacteria	183925|Methanobacteria	H	synthase	cysG	-	1.3.1.76,4.99.1.4	ko:K02304	ko00860,ko01100,ko01110,ko01120,map00860,map01100,map01110,map01120	M00121	R02864,R03947	RC01012,RC01034	ko00000,ko00001,ko00002,ko01000	-	-	-	NAD_binding_7
none	NODE_378_length_8010_cov_8_778632_g203_i0_1	269797.Mbar_A3687	3.6800000000000004e-57	183.0	COG0049@1|root,arCOG04254@2157|Archaea,2XTDC@28890|Euryarchaeota,2N9K7@224756|Methanomicrobia	224756|Methanomicrobia	J	One of the primary rRNA binding proteins, it binds directly to 16S rRNA where it nucleates assembly of the head domain of the 30S subunit. Is located at the subunit interface close to the decoding center	rps7	-	-	ko:K02992	ko03010,map03010	M00178,M00179	-	-	br01610,ko00000,ko00001,ko00002,ko03011	-	-	-	Ribosomal_S7
none	NODE_378_length_8010_cov_8_778632_g203_i0_2	572546.Arcpr_0982	2.16e-74	225.0	COG0048@1|root,arCOG04255@2157|Archaea,2XX4A@28890|Euryarchaeota,2465W@183980|Archaeoglobi	183980|Archaeoglobi	J	With S4 and S5 plays an important role in translational accuracy. Located at the interface of the 30S and 50S subunits	rps12	-	-	ko:K02950	ko03010,map03010	M00178,M00179	-	-	br01610,ko00000,ko00001,ko00002,ko03011	-	-	-	Ribosom_S12_S23
none	NODE_378_length_8010_cov_8_778632_g203_i0_3	1094980.Mpsy_1011	3.19e-60	189.0	COG0195@1|root,arCOG01760@2157|Archaea,2XYAY@28890|Euryarchaeota,2N9SC@224756|Methanomicrobia	224756|Methanomicrobia	K	transcription termination protein NusA	nusA	-	-	ko:K02600	-	-	-	-	ko00000,ko03009,ko03021	-	-	-	KH_2
none	NODE_378_length_8010_cov_8_778632_g203_i0_4	351160.LRC359	2.18e-30	110.0	COG1911@1|root,arCOG01752@2157|Archaea,2Y0CU@28890|Euryarchaeota,2NA2A@224756|Methanomicrobia	224756|Methanomicrobia	J	PFAM ribosomal protein L7Ae L30e S12e Gadd45	rpl30e	-	-	ko:K02908	ko03010,map03010	M00177,M00179	-	-	br01610,ko00000,ko00001,ko00002,ko03011	-	-	-	Ribosomal_L7Ae
none	NODE_378_length_8010_cov_8_778632_g203_i0_5	1041930.Mtc_2147	2.6e-168	482.0	COG0086@1|root,arCOG04256@2157|Archaea,2XTJ6@28890|Euryarchaeota,2N927@224756|Methanomicrobia	224756|Methanomicrobia	K	DNA-dependent RNA polymerase catalyzes the transcription of DNA into RNA using the four ribonucleoside triphosphates as substrates	rpoA2	-	2.7.7.6	ko:K03042	ko00230,ko00240,ko01100,ko03020,map00230,map00240,map01100,map03020	M00184	R00435,R00441,R00442,R00443	RC02795	br01611,ko00000,ko00001,ko00002,ko01000,ko03021	-	-	-	RNA_pol_Rpb1_5
none	NODE_378_length_8010_cov_8_778632_g203_i0_6	1094980.Mpsy_1008	1.0800000000000001e-85	276.0	COG0086@1|root,arCOG04257@2157|Archaea,2XTBZ@28890|Euryarchaeota,2N96G@224756|Methanomicrobia	224756|Methanomicrobia	K	DNA-dependent RNA polymerase catalyzes the transcription of DNA into RNA using the four ribonucleoside triphosphates as substrates	rpoA1	-	2.7.7.6	ko:K03041	ko00230,ko00240,ko01100,ko03020,map00230,map00240,map01100,map03020	M00184	R00435,R00441,R00442,R00443	RC02795	br01611,ko00000,ko00001,ko00002,ko01000,ko03021	-	-	-	RNA_pol_Rpb1_1,RNA_pol_Rpb1_2,RNA_pol_Rpb1_3,RNA_pol_Rpb1_4,RNA_pol_Rpb1_5
none	NODE_378_length_8010_cov_8_778632_g203_i0_7	269797.Mbar_A3692	1.0699999999999999e-48	174.0	COG0086@1|root,arCOG04257@2157|Archaea,2XTBZ@28890|Euryarchaeota,2N96G@224756|Methanomicrobia	224756|Methanomicrobia	K	DNA-dependent RNA polymerase catalyzes the transcription of DNA into RNA using the four ribonucleoside triphosphates as substrates	rpoA1	-	2.7.7.6	ko:K03041	ko00230,ko00240,ko01100,ko03020,map00230,map00240,map01100,map03020	M00184	R00435,R00441,R00442,R00443	RC02795	br01611,ko00000,ko00001,ko00002,ko01000,ko03021	-	-	-	RNA_pol_Rpb1_1,RNA_pol_Rpb1_2,RNA_pol_Rpb1_3,RNA_pol_Rpb1_4,RNA_pol_Rpb1_5
none	NODE_378_length_8010_cov_8_778632_g203_i0_8	351160.LRC357	9.370000000000001e-271	765.0	COG0086@1|root,arCOG04257@2157|Archaea,2XTBZ@28890|Euryarchaeota,2N96G@224756|Methanomicrobia	224756|Methanomicrobia	K	DNA-dependent RNA polymerase catalyzes the transcription of DNA into RNA using the four ribonucleoside triphosphates as substrates	rpoA1	-	2.7.7.6	ko:K03041	ko00230,ko00240,ko01100,ko03020,map00230,map00240,map01100,map03020	M00184	R00435,R00441,R00442,R00443	RC02795	br01611,ko00000,ko00001,ko00002,ko01000,ko03021	-	-	-	RNA_pol_Rpb1_1,RNA_pol_Rpb1_2,RNA_pol_Rpb1_3,RNA_pol_Rpb1_4,RNA_pol_Rpb1_5
none	NODE_378_length_8010_cov_8_778632_g203_i0_9	269797.Mbar_A3693	0.0	927.0	COG0085@1|root,arCOG01762@2157|Archaea,2XU1X@28890|Euryarchaeota,2N93R@224756|Methanomicrobia	224756|Methanomicrobia	K	DNA-dependent RNA polymerase catalyzes the transcription of DNA into RNA using the four ribonucleoside triphosphates as substrates	rpoB2	-	2.7.7.6	ko:K03044	ko00230,ko00240,ko01100,ko03020,map00230,map00240,map01100,map03020	M00184	R00435,R00441,R00442,R00443	RC02795	br01611,ko00000,ko00001,ko00002,ko01000,ko03021	-	-	-	RNA_pol_Rpb2_4,RNA_pol_Rpb2_5,RNA_pol_Rpb2_6,RNA_pol_Rpb2_7
none	NODE_378_length_8010_cov_8_778632_g203_i0_10	269797.Mbar_A3694	5.12e-145	424.0	COG0085@1|root,arCOG01762@2157|Archaea,2XU9Q@28890|Euryarchaeota,2N99Y@224756|Methanomicrobia	224756|Methanomicrobia	K	Belongs to the RNA polymerase beta chain family	rpoB1	-	2.7.7.6	ko:K03045	ko00230,ko00240,ko01100,ko03020,map00230,map00240,map01100,map03020	M00184	R00435,R00441,R00442,R00443	RC02795	br01611,ko00000,ko00001,ko00002,ko01000,ko03021	-	-	-	RNA_pol_Rpb2_1,RNA_pol_Rpb2_2,RNA_pol_Rpb2_3
none	NODE_483_length_6479_cov_8_404621_g262_i0_1	192952.MM_0911	6.279999999999999e-242	681.0	COG1123@1|root,arCOG00185@2157|Archaea,2Y7KQ@28890|Euryarchaeota,2N960@224756|Methanomicrobia	224756|Methanomicrobia	E	PFAM ABC transporter	atw-1	-	-	ko:K00400	ko00680,ko01100,ko01120,map00680,map01100,map01120	-	-	-	ko00000,ko00001	-	-	-	ABC_tran
none	NODE_483_length_6479_cov_8_404621_g262_i0_2	269797.Mbar_A0706	2.27e-155	459.0	COG4070@1|root,arCOG04900@2157|Archaea,2XU32@28890|Euryarchaeota,2N90Y@224756|Methanomicrobia	224756|Methanomicrobia	O	Belongs to the UPF0288 family	-	-	-	-	-	-	-	-	-	-	-	-	-
none	NODE_483_length_6479_cov_8_404621_g262_i0_3	269797.Mbar_A0705	3.17e-37	131.0	COG4029@1|root,arCOG04901@2157|Archaea,2XZQS@28890|Euryarchaeota,2N9W1@224756|Methanomicrobia	224756|Methanomicrobia	S	Uncharacterized protein conserved in archaea (DUF2102)	-	-	-	-	-	-	-	-	-	-	-	-	DUF2102
none	NODE_483_length_6479_cov_8_404621_g262_i0_4	1041930.Mtc_1852	2.25e-58	185.0	COG4050@1|root,arCOG04903@2157|Archaea,2XY68@28890|Euryarchaeota,2N9PJ@224756|Methanomicrobia	224756|Methanomicrobia	S	Uncharacterized protein conserved in archaea (DUF2112)	-	-	-	-	-	-	-	-	-	-	-	-	DUF2112
none	NODE_483_length_6479_cov_8_404621_g262_i0_5	368407.Memar_2061	3.47e-196	555.0	COG1924@1|root,arCOG02679@2157|Archaea,2XU50@28890|Euryarchaeota,2N92J@224756|Methanomicrobia	224756|Methanomicrobia	I	PFAM ATPase, BadF BadG BcrA BcrD type	-	-	-	-	-	-	-	-	-	-	-	-	BcrAD_BadFG
none	NODE_483_length_6479_cov_8_404621_g262_i0_6	1041930.Mtc_1850	1.76e-37	135.0	COG4051@1|root,arCOG04904@2157|Archaea,2Y0XT@28890|Euryarchaeota,2N9XA@224756|Methanomicrobia	224756|Methanomicrobia	S	Uncharacterized protein conserved in archaea (DUF2113)	-	-	-	-	-	-	-	-	-	-	-	-	DUF2113
none	NODE_483_length_6479_cov_8_404621_g262_i0_7	351160.LRC174	2.3e-86	264.0	COG4052@1|root,arCOG03226@2157|Archaea,2XTWG@28890|Euryarchaeota,2N9D6@224756|Methanomicrobia	224756|Methanomicrobia	S	methanogenesis marker protein 7	-	-	-	-	-	-	-	-	-	-	-	-	MCR_C
none	NODE_661_length_4804_cov_4_709152_g359_i0_1	304371.MCP_1638	6.2300000000000004e-58	189.0	COG1608@1|root,arCOG00860@2157|Archaea,2XSUI@28890|Euryarchaeota,2N9PA@224756|Methanomicrobia	224756|Methanomicrobia	I	Catalyzes the formation of isopentenyl diphosphate (IPP), the building block of all isoprenoids	-	-	2.7.4.26	ko:K06981	ko00900,ko01110,ko01130,map00900,map01110,map01130	-	R10093	RC00002	ko00000,ko00001,ko01000	-	-	-	AA_kinase
none	NODE_661_length_4804_cov_4_709152_g359_i0_2	391623.TERMP_00143	9.32e-66	217.0	COG1577@1|root,arCOG01028@2157|Archaea,2XSUB@28890|Euryarchaeota,2437V@183968|Thermococci	183968|Thermococci	F	Catalyzes the phosphorylation of (R)-mevalonate (MVA) to (R)-mevalonate 5-phosphate (MVAP). Functions in the mevalonate (MVA) pathway leading to isopentenyl diphosphate (IPP), a key precursor for the biosynthesis of isoprenoid compounds such as archaeal membrane lipids	mvk	GO:0003674,GO:0003824,GO:0004496,GO:0005575,GO:0005622,GO:0005623,GO:0005737,GO:0005829,GO:0006084,GO:0006139,GO:0006163,GO:0006629,GO:0006637,GO:0006644,GO:0006720,GO:0006725,GO:0006732,GO:0006753,GO:0006790,GO:0006793,GO:0006796,GO:0006807,GO:0008150,GO:0008152,GO:0008202,GO:0008299,GO:0008610,GO:0008654,GO:0009058,GO:0009117,GO:0009150,GO:0009240,GO:0009259,GO:0009987,GO:0016125,GO:0016301,GO:…	2.7.1.36	ko:K00869	ko00900,ko01100,ko01110,ko01130,ko04146,map00900,map01100,map01110,map01130,map04146	M00095	R02245	RC00002,RC00017	ko00000,ko00001,ko00002,ko01000	-	-	-	GHMP_kinases_C,GHMP_kinases_N
none	NODE_661_length_4804_cov_4_709152_g359_i0_3	269797.Mbar_A1422	3.98e-106	315.0	COG1355@1|root,arCOG01728@2157|Archaea,2XVYU@28890|Euryarchaeota,2N9H3@224756|Methanomicrobia	224756|Methanomicrobia	S	Belongs to the MEMO1 family	-	-	-	ko:K06990	-	-	-	-	ko00000,ko04812	-	-	-	Memo
none	NODE_661_length_4804_cov_4_709152_g359_i0_4	1041930.Mtc_2281	3.1200000000000002e-99	293.0	COG0052@1|root,arCOG04245@2157|Archaea,2XTHM@28890|Euryarchaeota,2N9BZ@224756|Methanomicrobia	224756|Methanomicrobia	J	Belongs to the universal ribosomal protein uS2 family	rps2	-	-	ko:K02967	ko03010,map03010	M00178,M00179	-	-	br01610,ko00000,ko00001,ko00002,ko03011	-	-	-	Ribosomal_S2
none	NODE_661_length_4804_cov_4_709152_g359_i0_5	521011.Mpal_2380	8.52e-21	83.6	COG1758@1|root,arCOG01268@2157|Archaea,2XZSW@28890|Euryarchaeota,2NA2R@224756|Methanomicrobia	224756|Methanomicrobia	K	DNA-dependent RNA polymerase catalyzes the transcription of DNA into RNA using the four ribonucleoside triphosphates as substrates	rpoK	-	2.7.7.6	ko:K03055	ko00230,ko00240,ko01100,ko03020,map00230,map00240,map01100,map03020	M00184	R00435,R00441,R00442,R00443	RC02795	br01611,ko00000,ko00001,ko00002,ko01000,ko03021	-	-	-	RNA_pol_Rpb6
none	NODE_661_length_4804_cov_4_709152_g359_i0_6	304371.MCP_1644	1.24e-24	93.6	COG1644@1|root,arCOG04244@2157|Archaea,2Y03I@28890|Euryarchaeota,2NA2D@224756|Methanomicrobia	224756|Methanomicrobia	K	DNA-dependent RNA polymerase catalyzes the transcription of DNA into RNA using the four ribonucleoside triphosphates as substrates	rpoN	-	2.7.7.6	ko:K03058	ko00230,ko00240,ko01100,ko03020,map00230,map00240,map01100,map03020	M00184	R00435,R00441,R00442,R00443	RC02795	br01611,ko00000,ko00001,ko00002,ko01000,ko03021	-	-	-	RNA_pol_N
none	NODE_661_length_4804_cov_4_709152_g359_i0_7	1094980.Mpsy_0878	7.57e-55	175.0	COG0088@1|root,arCOG04243@2157|Archaea,2XWK0@28890|Euryarchaeota,2N9S9@224756|Methanomicrobia	224756|Methanomicrobia	J	Belongs to the universal ribosomal protein uS9 family	rps9	-	-	ko:K02996	ko03010,map03010	M00178,M00179	-	-	br01610,ko00000,ko00001,ko00002,ko03011	-	-	-	Ribosomal_S9
none	NODE_661_length_4804_cov_4_709152_g359_i0_8	1041930.Mtc_2276	1.05e-47	157.0	COG0102@1|root,arCOG04242@2157|Archaea,2XWN6@28890|Euryarchaeota,2N9Q5@224756|Methanomicrobia	224756|Methanomicrobia	J	This protein is one of the early assembly proteins of the 50S ribosomal subunit, although it is not seen to bind rRNA by itself. It is important during the early stages of 50S assembly	rpl13	-	-	ko:K02871	ko03010,map03010	M00178,M00179	-	-	br01610,ko00000,ko00001,ko00002,ko03011	-	-	-	Ribosomal_L13
none	NODE_661_length_4804_cov_4_709152_g359_i0_9	1041930.Mtc_2275	2.4799999999999996e-42	142.0	COG1727@1|root,arCOG00780@2157|Archaea,2XZ6R@28890|Euryarchaeota,2N9UH@224756|Methanomicrobia	224756|Methanomicrobia	J	Belongs to the eukaryotic ribosomal protein eL18 family	rpl18e	-	-	ko:K02883	ko03010,map03010	M00177,M00179	-	-	br01610,ko00000,ko00001,ko00002,ko03011	-	-	-	Ribosomal_L18
none	NODE_750_length_4189_cov_10_072643_g412_i0_1	1094980.Mpsy_2551	4.99e-94	290.0	COG0484@1|root,arCOG06880@1|root,arCOG02846@2157|Archaea,arCOG06880@2157|Archaea,2XV5D@28890|Euryarchaeota,2N95Q@224756|Methanomicrobia	224756|Methanomicrobia	O	ATP binding to DnaK triggers the release of the substrate protein, thus completing the reaction cycle. Several rounds of ATP-dependent interactions between DnaJ, DnaK and GrpE are required for fully efficient folding. Also involved, together with DnaK and GrpE, in the DNA replication of plasmids through activation of initiation proteins	dnaJ	-	-	ko:K03686	-	-	-	-	ko00000,ko03029,ko03110	-	-	-	DnaJ,DnaJ_C,DnaJ_CXXCXGXG
none	NODE_750_length_4189_cov_10_072643_g412_i0_2	1041930.Mtc_1154	4.74e-290	810.0	COG0443@1|root,arCOG03060@2157|Archaea,2XT86@28890|Euryarchaeota,2N91T@224756|Methanomicrobia	224756|Methanomicrobia	O	Heat shock 70 kDa protein	dnaK	-	-	ko:K04043	ko03018,ko04212,ko05152,map03018,map04212,map05152	-	-	-	ko00000,ko00001,ko03019,ko03029,ko03110,ko04147	1.A.33.1	-	-	HSP70
none	NODE_750_length_4189_cov_10_072643_g412_i0_3	1121422.AUMW01000027_gene434	9.2e-29	113.0	COG0576@1|root,COG0576@2|Bacteria,1V6G2@1239|Firmicutes,24MQK@186801|Clostridia,26214@186807|Peptococcaceae	186801|Clostridia	O	Participates actively in the response to hyperosmotic and heat shock by preventing the aggregation of stress-denatured proteins, in association with DnaK and GrpE. It is the nucleotide exchange factor for DnaK and may function as a thermosensor. Unfolded proteins bind initially to DnaJ	grpE	-	-	ko:K03687	-	-	-	-	ko00000,ko03029,ko03110	-	-	-	GrpE
none	NODE_750_length_4189_cov_10_072643_g412_i0_4	224325.AF_2238	7.67e-77	248.0	COG0459@1|root,arCOG01257@2157|Archaea,2XUDQ@28890|Euryarchaeota,245PX@183980|Archaeoglobi	183980|Archaeoglobi	O	PFAM Chaperonin Cpn60 TCP-1	-	-	-	ko:K22447	-	-	-	-	ko00000,ko03110	-	-	-	Cpn60_TCP1
none	NODE_767_length_4109_cov_10_240089_g422_i0_1	1094980.Mpsy_1767	1.98e-74	228.0	COG1014@1|root,arCOG01603@2157|Archaea,2XVFR@28890|Euryarchaeota,2N9J1@224756|Methanomicrobia	224756|Methanomicrobia	C	TIGRFAM pyruvate ketoisovalerate oxidoreductase, gamma subunit	porC-1	-	1.2.7.1	ko:K00172	ko00010,ko00020,ko00620,ko00633,ko00640,ko00650,ko00680,ko00720,ko01100,ko01120,ko01130,ko01200,map00010,map00020,map00620,map00633,map00640,map00650,map00680,map00720,map01100,map01120,map01130,map01200	M00173,M00307,M00374,M00620	R01196,R01199,R08034	RC00004,RC00250,RC02742,RC02833	br01601,ko00000,ko00001,ko00002,ko01000	-	-	-	POR
none	NODE_767_length_4109_cov_10_240089_g422_i0_2	1121456.ATVA01000013_gene1042	2.87e-18	79.3	COG1144@1|root,COG1144@2|Bacteria,1NM08@1224|Proteobacteria,42SV1@68525|delta/epsilon subdivisions,2X5PM@28221|Deltaproteobacteria	28221|Deltaproteobacteria	C	4Fe-4S binding domain	-	-	1.2.7.1	ko:K00171	ko00010,ko00020,ko00620,ko00633,ko00640,ko00650,ko00680,ko00720,ko01100,ko01120,ko01130,ko01200,map00010,map00020,map00620,map00633,map00640,map00650,map00680,map00720,map01100,map01120,map01130,map01200	M00173,M00307,M00374,M00620	R01196,R01199,R08034	RC00004,RC00250,RC02742,RC02833	br01601,ko00000,ko00001,ko00002,ko01000	-	-	-	Fer4
none	NODE_767_length_4109_cov_10_240089_g422_i0_3	192952.MM_1340	9.53e-168	482.0	COG0674@1|root,arCOG01608@2157|Archaea,2XTB0@28890|Euryarchaeota,2N98Z@224756|Methanomicrobia	224756|Methanomicrobia	C	PFAM pyruvate flavodoxin ferredoxin oxidoreductase domain protein	porA-1	-	1.2.7.1	ko:K00169	ko00010,ko00020,ko00620,ko00633,ko00640,ko00650,ko00680,ko00720,ko01100,ko01120,ko01130,ko01200,map00010,map00020,map00620,map00633,map00640,map00650,map00680,map00720,map01100,map01120,map01130,map01200	M00173,M00307,M00374,M00620	R01196,R01199,R08034	RC00004,RC00250,RC02742,RC02833	br01601,ko00000,ko00001,ko00002,ko01000	-	-	-	PFOR_II,POR_N
none	NODE_767_length_4109_cov_10_240089_g422_i0_4	593750.Metfor_2541	4.03e-124	363.0	COG1013@1|root,arCOG01601@2157|Archaea,2XT3E@28890|Euryarchaeota,2N989@224756|Methanomicrobia	224756|Methanomicrobia	C	thiamine pyrophosphate enzyme domain protein TPP-binding	porB-1	-	1.2.7.1	ko:K00170	ko00010,ko00020,ko00620,ko00633,ko00640,ko00650,ko00680,ko00720,ko01100,ko01120,ko01130,ko01200,map00010,map00020,map00620,map00633,map00640,map00650,map00680,map00720,map01100,map01120,map01130,map01200	M00173,M00307,M00374,M00620	R01196,R01199,R08034	RC00004,RC00250,RC02742,RC02833	br01601,ko00000,ko00001,ko00002,ko01000	-	-	-	TPP_enzyme_C
none	NODE_767_length_4109_cov_10_240089_g422_i0_5	304371.MCP_2615	1.6499999999999998e-52	173.0	COG3363@1|root,arCOG04727@2157|Archaea,2XTEV@28890|Euryarchaeota	28890|Euryarchaeota	F	Catalyzes the cyclization of 5-formylamidoimidazole-4- carboxamide ribonucleotide to IMP	purO	-	3.5.4.10	ko:K11176	ko00230,ko01100,ko01110,ko01130,map00230,map01100,map01110,map01130	M00048	R01127	RC00456	ko00000,ko00001,ko00002,ko01000	-	-	-	IMP_cyclohyd
none	NODE_770_length_4070_cov_10_249437_g422_i1_1	1094980.Mpsy_1767	1.98e-74	228.0	COG1014@1|root,arCOG01603@2157|Archaea,2XVFR@28890|Euryarchaeota,2N9J1@224756|Methanomicrobia	224756|Methanomicrobia	C	TIGRFAM pyruvate ketoisovalerate oxidoreductase, gamma subunit	porC-1	-	1.2.7.1	ko:K00172	ko00010,ko00020,ko00620,ko00633,ko00640,ko00650,ko00680,ko00720,ko01100,ko01120,ko01130,ko01200,map00010,map00020,map00620,map00633,map00640,map00650,map00680,map00720,map01100,map01120,map01130,map01200	M00173,M00307,M00374,M00620	R01196,R01199,R08034	RC00004,RC00250,RC02742,RC02833	br01601,ko00000,ko00001,ko00002,ko01000	-	-	-	POR
none	NODE_770_length_4070_cov_10_249437_g422_i1_2	1121456.ATVA01000013_gene1042	2.87e-18	79.3	COG1144@1|root,COG1144@2|Bacteria,1NM08@1224|Proteobacteria,42SV1@68525|delta/epsilon subdivisions,2X5PM@28221|Deltaproteobacteria	28221|Deltaproteobacteria	C	4Fe-4S binding domain	-	-	1.2.7.1	ko:K00171	ko00010,ko00020,ko00620,ko00633,ko00640,ko00650,ko00680,ko00720,ko01100,ko01120,ko01130,ko01200,map00010,map00020,map00620,map00633,map00640,map00650,map00680,map00720,map01100,map01120,map01130,map01200	M00173,M00307,M00374,M00620	R01196,R01199,R08034	RC00004,RC00250,RC02742,RC02833	br01601,ko00000,ko00001,ko00002,ko01000	-	-	-	Fer4
none	NODE_770_length_4070_cov_10_249437_g422_i1_3	192952.MM_1340	9.53e-168	482.0	COG0674@1|root,arCOG01608@2157|Archaea,2XTB0@28890|Euryarchaeota,2N98Z@224756|Methanomicrobia	224756|Methanomicrobia	C	PFAM pyruvate flavodoxin ferredoxin oxidoreductase domain protein	porA-1	-	1.2.7.1	ko:K00169	ko00010,ko00020,ko00620,ko00633,ko00640,ko00650,ko00680,ko00720,ko01100,ko01120,ko01130,ko01200,map00010,map00020,map00620,map00633,map00640,map00650,map00680,map00720,map01100,map01120,map01130,map01200	M00173,M00307,M00374,M00620	R01196,R01199,R08034	RC00004,RC00250,RC02742,RC02833	br01601,ko00000,ko00001,ko00002,ko01000	-	-	-	PFOR_II,POR_N
none	NODE_770_length_4070_cov_10_249437_g422_i1_4	264732.Moth_1591	0.000411	42.4	COG1013@1|root,COG1013@2|Bacteria,1TPF0@1239|Firmicutes,24BE5@186801|Clostridia,42HZF@68295|Thermoanaerobacterales	186801|Clostridia	C	Thiamine pyrophosphate enzyme, C-terminal TPP binding domain	-	GO:0003674,GO:0003824,GO:0005488,GO:0006082,GO:0008150,GO:0008152,GO:0009056,GO:0009987,GO:0016054,GO:0016491,GO:0016625,GO:0016903,GO:0019752,GO:0033609,GO:0033611,GO:0043436,GO:0043648,GO:0043649,GO:0044237,GO:0044248,GO:0044281,GO:0044282,GO:0046395,GO:0048037,GO:0051536,GO:0051539,GO:0051540,GO:0055114,GO:0071704,GO:1901575	1.2.7.1,1.2.7.10	ko:K00170,ko:K19071	ko00010,ko00020,ko00620,ko00633,ko00640,ko00650,ko00680,ko00720,ko01100,ko01120,ko01130,ko01200,map00010,map00020,map00620,map00633,map00640,map00650,map00680,map00720,map01100,map01120,map01130,map01200	M00173,M00307,M00374,M00620	R01196,R01199,R08034	RC00004,RC00250,RC02742,RC02833	br01601,ko00000,ko00001,ko00002,ko01000	-	-	-	TPP_enzyme_C
none	NODE_770_length_4070_cov_10_249437_g422_i1_5	593750.Metfor_2541	1.21e-75	236.0	COG1013@1|root,arCOG01601@2157|Archaea,2XT3E@28890|Euryarchaeota,2N989@224756|Methanomicrobia	224756|Methanomicrobia	C	thiamine pyrophosphate enzyme domain protein TPP-binding	porB-1	-	1.2.7.1	ko:K00170	ko00010,ko00020,ko00620,ko00633,ko00640,ko00650,ko00680,ko00720,ko01100,ko01120,ko01130,ko01200,map00010,map00020,map00620,map00633,map00640,map00650,map00680,map00720,map01100,map01120,map01130,map01200	M00173,M00307,M00374,M00620	R01196,R01199,R08034	RC00004,RC00250,RC02742,RC02833	br01601,ko00000,ko00001,ko00002,ko01000	-	-	-	TPP_enzyme_C
none	NODE_770_length_4070_cov_10_249437_g422_i1_6	304371.MCP_2615	1.6499999999999998e-52	173.0	COG3363@1|root,arCOG04727@2157|Archaea,2XTEV@28890|Euryarchaeota	28890|Euryarchaeota	F	Catalyzes the cyclization of 5-formylamidoimidazole-4- carboxamide ribonucleotide to IMP	purO	-	3.5.4.10	ko:K11176	ko00230,ko01100,ko01110,ko01130,map00230,map01100,map01110,map01130	M00048	R01127	RC00456	ko00000,ko00001,ko00002,ko01000	-	-	-	IMP_cyclohyd
none	NODE_2146_length_1662_cov_14_848962_g1520_i0_2	269797.Mbar_A1073	4.85e-75	236.0	COG0012@1|root,arCOG00357@2157|Archaea,2XTZG@28890|Euryarchaeota,2N94X@224756|Methanomicrobia	224756|Methanomicrobia	J	TGS domain protein	-	-	-	ko:K06942	-	-	-	-	ko00000,ko03009	-	-	-	MMR_HSR1,MMR_HSR1_C,TGS
none	NODE_1425_length_2219_cov_687_667288_g903_i0_1	693661.Arcve_0328	1.8e-254	723.0	COG0365@1|root,arCOG01529@2157|Archaea,2XTAB@28890|Euryarchaeota,246QT@183980|Archaeoglobi	183980|Archaeoglobi	I	Catalyzes the conversion of acetate into acetyl-CoA (AcCoA), an essential intermediate at the junction of anabolic and catabolic pathways. AcsA undergoes a two-step reaction. In the first half reaction, AcsA combines acetate with ATP to form acetyl-adenylate (AcAMP) intermediate. In the second half reaction, it can then transfer the acetyl group from AcAMP to the sulfhydryl group of CoA, forming …	-	-	6.2.1.1	ko:K01895	ko00010,ko00620,ko00640,ko00680,ko00720,ko01100,ko01110,ko01120,ko01130,ko01200,map00010,map00620,map00640,map00680,map00720,map01100,map01110,map01120,map01130,map01200	M00357	R00235,R00236,R00316,R00926,R01354	RC00004,RC00012,RC00043,RC00070,RC02746,RC02816	ko00000,ko00001,ko00002,ko01000,ko01004	-	-	-	ACAS_N,AMP-binding,AMP-binding_C
none	NODE_1757_length_1885_cov_16_086093_g1182_i0_1	386456.JQKN01000002_gene2606	2.23e-199	583.0	COG1305@1|root,arCOG02165@2157|Archaea,2XXMP@28890|Euryarchaeota,23PG0@183925|Methanobacteria	183925|Methanobacteria	E	PFAM Transglutaminase-like	-	-	-	-	-	-	-	-	-	-	-	-	DUF4015,PMBR,Transglut_core
none	NODE_1124_length_2686_cov_2_783773_g662_i0_1	1220534.B655_0396	9.21e-10	57.4	COG1396@1|root,arCOG01866@2157|Archaea,2XTT6@28890|Euryarchaeota,23NZK@183925|Methanobacteria	183925|Methanobacteria	K	Helix-turn-helix XRE-family like proteins	-	-	-	-	-	-	-	-	-	-	-	-	Cupin_2,HTH_19,HTH_3
none	NODE_1124_length_2686_cov_2_783773_g662_i0_2	192952.MM_3180	2.11e-204	580.0	COG0365@1|root,arCOG04201@2157|Archaea,2XSTQ@28890|Euryarchaeota,2N9F4@224756|Methanomicrobia	224756|Methanomicrobia	I	PFAM AMP-dependent synthetase and ligase	-	-	6.2.1.1	ko:K01895	ko00010,ko00620,ko00640,ko00680,ko00720,ko01100,ko01110,ko01120,ko01130,ko01200,map00010,map00620,map00640,map00680,map00720,map01100,map01110,map01120,map01130,map01200	M00357	R00235,R00236,R00316,R00926,R01354	RC00004,RC00012,RC00043,RC00070,RC02746,RC02816	ko00000,ko00001,ko00002,ko01000,ko01004	-	-	-	AMP-binding,AMP-binding_C,HTH_17
none	NODE_1124_length_2686_cov_2_783773_g662_i0_3	269797.Mbar_A2172	2.2500000000000002e-87	278.0	COG0365@1|root,arCOG04201@2157|Archaea,2XSTQ@28890|Euryarchaeota,2N9F4@224756|Methanomicrobia	224756|Methanomicrobia	I	PFAM AMP-dependent synthetase and ligase	-	-	6.2.1.1	ko:K01895	ko00010,ko00620,ko00640,ko00680,ko00720,ko01100,ko01110,ko01120,ko01130,ko01200,map00010,map00620,map00640,map00680,map00720,map01100,map01110,map01120,map01130,map01200	M00357	R00235,R00236,R00316,R00926,R01354	RC00004,RC00012,RC00043,RC00070,RC02746,RC02816	ko00000,ko00001,ko00002,ko01000,ko01004	-	-	-	AMP-binding,AMP-binding_C,HTH_17
none	NODE_1124_length_2686_cov_2_783773_g662_i0_4	877455.Metbo_2453	2.13e-86	264.0	COG0674@1|root,arCOG01607@2157|Archaea,2XW4W@28890|Euryarchaeota,23PE7@183925|Methanobacteria	183925|Methanobacteria	C	ferredoxin oxidoreductase	-	-	1.2.7.7	ko:K00186	ko00280,ko01100,map00280,map01100	-	R07160,R08566,R08567	RC00004,RC02833,RC02856	br01601,ko00000,ko00001,ko01000	-	-	-	PFOR_II,POR_N
none	NODE_2226_length_1629_cov_2_287918_g1591_i0_1	868131.MSWAN_0873	1.15e-09	57.0	arCOG11509@1|root,arCOG11509@2157|Archaea,2Y3KG@28890|Euryarchaeota	28890|Euryarchaeota	-	-	-	-	-	-	-	-	-	-	-	-	-	-	-
none	NODE_2226_length_1629_cov_2_287918_g1591_i0_2	386456.JQKN01000016_gene908	1.5699999999999998e-81	255.0	COG0369@1|root,COG1773@1|root,arCOG02430@2157|Archaea,arCOG04391@2157|Archaea,2XV44@28890|Euryarchaeota,23NS7@183925|Methanobacteria	183925|Methanobacteria	C	Catalyzes the reduction of hydroxylamine to form NH(3) and H(2)O	hcp	-	1.7.99.1	ko:K05601	ko00910,map00910	-	R00143	RC02797	ko00000,ko00001,ko01000	-	-	-	Prismane,Rubredoxin
none	NODE_2226_length_1629_cov_2_287918_g1591_i0_3	386456.JQKN01000016_gene908	3.66e-77	243.0	COG0369@1|root,COG1773@1|root,arCOG02430@2157|Archaea,arCOG04391@2157|Archaea,2XV44@28890|Euryarchaeota,23NS7@183925|Methanobacteria	183925|Methanobacteria	C	Catalyzes the reduction of hydroxylamine to form NH(3) and H(2)O	hcp	-	1.7.99.1	ko:K05601	ko00910,map00910	-	R00143	RC02797	ko00000,ko00001,ko01000	-	-	-	Prismane,Rubredoxin
none	NODE_2229_length_1626_cov_7_184160_g1594_i0_1	386456.JQKN01000001_gene2126	4.23e-131	374.0	COG0081@1|root,arCOG04289@2157|Archaea,2XTJF@28890|Euryarchaeota,23NR7@183925|Methanobacteria	183925|Methanobacteria	J	Binds directly to 23S rRNA. Probably involved in E site tRNA release	rpl1	-	-	ko:K02863	ko03010,map03010	M00178,M00179	-	-	br01610,ko00000,ko00001,ko00002,ko03011	-	-	-	Ribosomal_L1
none	NODE_2229_length_1626_cov_7_184160_g1594_i0_2	386456.JQKN01000001_gene2125	2.25e-145	418.0	COG0244@1|root,arCOG04288@2157|Archaea,2XU7C@28890|Euryarchaeota,23NKW@183925|Methanobacteria	183925|Methanobacteria	J	Forms part of the ribosomal stalk, playing a central role in the interaction of the ribosome with GTP-bound translation factors	rpl10	-	-	ko:K02864	ko03010,map03010	M00178,M00179	-	-	br01610,ko00000,ko00001,ko00002,ko03011	-	-	-	Ribosomal_L10
none	NODE_2633_length_1466_cov_3_904523_g1939_i0_1	868131.MSWAN_1885	4.8e-45	155.0	COG0730@1|root,arCOG02050@2157|Archaea,2XXQV@28890|Euryarchaeota,23PE9@183925|Methanobacteria	183925|Methanobacteria	S	Sulfite exporter TauE/SafE	-	-	-	ko:K07090	-	-	-	-	ko00000	-	-	-	TauE
none	NODE_2633_length_1466_cov_3_904523_g1939_i0_2	304371.MCP_2424	2.26e-143	414.0	COG0162@1|root,arCOG01886@2157|Archaea,2XTA0@28890|Euryarchaeota,2N98T@224756|Methanomicrobia	224756|Methanomicrobia	J	Catalyzes the attachment of tyrosine to tRNA(Tyr) in a two-step reaction tyrosine is first activated by ATP to form Tyr- AMP and then transferred to the acceptor end of tRNA(Tyr)	tyrS	-	6.1.1.1	ko:K01866	ko00970,map00970	M00359,M00360	R02918	RC00055,RC00523	ko00000,ko00001,ko00002,ko01000,ko01007,ko03016,ko03029	-	-	-	tRNA-synt_1b
none	NODE_2692_length_1451_cov_4_301161_g1995_i0_1	1158318.ATXC01000002_gene1643	4.58e-187	529.0	COG1260@1|root,COG1260@2|Bacteria,2G3U0@200783|Aquificae	200783|Aquificae	I	Myo-inositol-1-phosphate synthase	-	-	5.5.1.4	ko:K01858	ko00521,ko00562,ko01100,ko01130,map00521,map00562,map01100,map01130	-	R07324	RC01804	ko00000,ko00001,ko01000	-	-	-	Inos-1-P_synth
none	NODE_3270_length_1301_cov_2_431596_g2535_i0_1	1220534.B655_0897	4.98e-86	273.0	COG1123@1|root,arCOG00185@2157|Archaea,2XVG9@28890|Euryarchaeota,23NK9@183925|Methanobacteria	183925|Methanobacteria	E	ATPases associated with a variety of cellular activities	-	-	-	ko:K00400	ko00680,ko01100,ko01120,map00680,map01100,map01120	-	-	-	ko00000,ko00001	-	-	-	ABC_tran
none	NODE_3270_length_1301_cov_2_431596_g2535_i0_2	1094980.Mpsy_1642	2.73e-30	122.0	COG0143@1|root,arCOG00810@2157|Archaea,2XTG5@28890|Euryarchaeota,2N99D@224756|Methanomicrobia	224756|Methanomicrobia	J	Is required not only for elongation of protein synthesis but also for the initiation of all mRNA translation through initiator tRNA(fMet) aminoacylation	metG	-	6.1.1.10	ko:K01874	ko00450,ko00970,map00450,map00970	M00359,M00360	R03659,R04773	RC00055,RC00523	ko00000,ko00001,ko00002,ko01000,ko01007,ko03016	-	-	iAF692.Mbar_A0543	Anticodon_1,tRNA-synt_1g,tRNA_bind
none	NODE_3437_length_1268_cov_4_027615_g2695_i0_1	386456.JQKN01000001_gene1959	6.23e-120	354.0	COG2048@1|root,arCOG00964@2157|Archaea,2XXYP@28890|Euryarchaeota,23NZ8@183925|Methanobacteria	183925|Methanobacteria	C	reductase, subunit	-	-	1.8.7.3,1.8.98.4,1.8.98.5,1.8.98.6	ko:K03390	ko00680,ko01100,ko01120,ko01200,map00680,map01100,map01120,map01200	M00356,M00357,M00563,M00567	R04540,R11928,R11931,R11943,R11944	RC00011	ko00000,ko00001,ko00002,ko01000	-	-	-	Fer4_8
none	NODE_3437_length_1268_cov_4_027615_g2695_i0_2	386456.JQKN01000001_gene1960	1.41e-77	238.0	COG2048@1|root,arCOG00338@2157|Archaea,2XTWJ@28890|Euryarchaeota,23NJW@183925|Methanobacteria	183925|Methanobacteria	C	reductase, subunit	hdrB1	-	1.8.7.3,1.8.98.4,1.8.98.5,1.8.98.6	ko:K03389	ko00680,ko01100,ko01120,ko01200,map00680,map01100,map01120,map01200	M00356,M00357,M00563,M00567	R04540,R11928,R11931,R11943,R11944	RC00011	ko00000,ko00001,ko00002,ko01000	-	-	-	CCG
none	NODE_3880_length_1184_cov_2_114311_g3112_i0_1	386456.JQKN01000007_gene3348	4.09e-12	63.9	COG1390@1|root,arCOG00869@2157|Archaea,2Y782@28890|Euryarchaeota,23P3B@183925|Methanobacteria	183925|Methanobacteria	C	Produces ATP from ADP in the presence of a proton gradient across the membrane	atpE	-	-	ko:K02121	ko00190,ko01100,map00190,map01100	M00159	-	-	ko00000,ko00001,ko00002	3.A.2.2,3.A.2.3	-	-	vATP-synt_E
none	NODE_3880_length_1184_cov_2_114311_g3112_i0_2	386456.JQKN01000007_gene3349	1.29e-118	351.0	COG1527@1|root,arCOG02459@2157|Archaea,2XTK5@28890|Euryarchaeota,23NMG@183925|Methanobacteria	183925|Methanobacteria	C	Produces ATP from ADP in the presence of a proton gradient across the membrane	atpC	-	-	ko:K02119	ko00190,ko01100,map00190,map01100	M00159	-	-	ko00000,ko00001,ko00002	3.A.2.2,3.A.2.3	-	-	vATP-synt_AC39
none	NODE_3880_length_1184_cov_2_114311_g3112_i0_3	386456.JQKN01000007_gene3349	6.54e-19	84.7	COG1527@1|root,arCOG02459@2157|Archaea,2XTK5@28890|Euryarchaeota,23NMG@183925|Methanobacteria	183925|Methanobacteria	C	Produces ATP from ADP in the presence of a proton gradient across the membrane	atpC	-	-	ko:K02119	ko00190,ko01100,map00190,map01100	M00159	-	-	ko00000,ko00001,ko00002	3.A.2.2,3.A.2.3	-	-	vATP-synt_AC39
none	NODE_3880_length_1184_cov_2_114311_g3112_i0_4	386456.JQKN01000007_gene3350	1.93e-06	46.6	COG1436@1|root,arCOG04102@2157|Archaea,2Y1TB@28890|Euryarchaeota,23P7Q@183925|Methanobacteria	183925|Methanobacteria	C	Produces ATP from ADP in the presence of a proton gradient across the membrane	ahaF	-	-	ko:K02122	ko00190,ko01100,map00190,map01100	M00159	-	-	ko00000,ko00001,ko00002	3.A.2.2,3.A.2.3	-	-	ATP-synt_F
none	NODE_4594_length_1077_cov_2_913347_g3787_i0_1	386456.JQKN01000001_gene1750	1.24e-114	333.0	COG1471@1|root,arCOG04093@2157|Archaea,2XT03@28890|Euryarchaeota,23NT9@183925|Methanobacteria	183925|Methanobacteria	J	Belongs to the eukaryotic ribosomal protein eS4 family	rps4e	-	-	ko:K02987	ko03010,map03010	M00177,M00179	-	-	br01610,ko00000,ko00001,ko00002,ko03011	-	-	-	RS4NT,Ribosomal_S4e,S4
none	NODE_4594_length_1077_cov_2_913347_g3787_i0_2	386456.JQKN01000001_gene1749	1.53e-90	267.0	COG0094@1|root,arCOG04092@2157|Archaea,2XTRN@28890|Euryarchaeota,23NYU@183925|Methanobacteria	183925|Methanobacteria	J	This is 1 of the proteins that binds and probably mediates the attachment of the 5S RNA into the large ribosomal subunit, where it forms part of the central protuberance. In the 70S ribosome it contacts protein S13 of the 30S subunit (bridge B1b), connecting the 2 subunits	rpl5	-	-	ko:K02931	ko03010,map03010	M00178,M00179	-	-	br01610,ko00000,ko00001,ko00002,ko03011	-	-	-	Ribosomal_L5,Ribosomal_L5_C
none	NODE_4628_length_1073_cov_2_334000_g1591_i1_1	386456.JQKN01000016_gene908	3.69e-54	185.0	COG0369@1|root,COG1773@1|root,arCOG02430@2157|Archaea,arCOG04391@2157|Archaea,2XV44@28890|Euryarchaeota,23NS7@183925|Methanobacteria	183925|Methanobacteria	C	Catalyzes the reduction of hydroxylamine to form NH(3) and H(2)O	hcp	-	1.7.99.1	ko:K05601	ko00910,map00910	-	R00143	RC02797	ko00000,ko00001,ko01000	-	-	-	Prismane,Rubredoxin
none	NODE_4628_length_1073_cov_2_334000_g1591_i1_2	386456.JQKN01000016_gene909	3.53e-09	53.9	arCOG10257@1|root,arCOG10257@2157|Archaea	2157|Archaea	-	-	-	-	-	-	-	-	-	-	-	-	-	-	-
none	NODE_4752_length_1055_cov_3_226069_g3937_i0_1	386456.JQKN01000002_gene2647	1.28e-206	587.0	COG0466@1|root,arCOG02160@2157|Archaea,2XTT0@28890|Euryarchaeota,23NR2@183925|Methanobacteria	183925|Methanobacteria	O	Belongs to the peptidase S16 family	-	-	3.4.21.53	ko:K04076	-	-	-	-	ko00000,ko01000,ko01002	-	-	-	AAA_32,Lon_C,Mg_chelatase,Sigma54_activat
none	NODE_5256_length_993_cov_3_542391_g4412_i0_1	877455.Metbo_0347	8.509999999999999e-52	182.0	COG1408@1|root,arCOG01156@2157|Archaea,2Y1DW@28890|Euryarchaeota,23PMV@183925|Methanobacteria	183925|Methanobacteria	S	Calcineurin-like phosphoesterase superfamily domain	-	-	-	ko:K07098	-	-	-	-	ko00000	-	-	-	Metallophos
none	NODE_5350_length_984_cov_2_604830_g4502_i0_1	868131.MSWAN_2320	1.15e-22	96.7	COG1148@1|root,arCOG02235@2157|Archaea,2XT3X@28890|Euryarchaeota,23NUK@183925|Methanobacteria	183925|Methanobacteria	C	Pyridine nucleotide-disulphide oxidoreductase	-	-	1.8.7.3,1.8.98.4,1.8.98.5,1.8.98.6	ko:K03388	ko00680,ko01100,ko01120,ko01200,map00680,map01100,map01120,map01200	M00356,M00357,M00563,M00567	R04540,R11928,R11931,R11943,R11944	RC00011	ko00000,ko00001,ko00002,ko01000	-	-	-	Fer4,Fer4_4,Pyr_redox_2
none	NODE_5350_length_984_cov_2_604830_g4502_i0_2	877455.Metbo_0164	5.48e-168	486.0	COG1148@1|root,arCOG02235@2157|Archaea,2XT3X@28890|Euryarchaeota,23NUK@183925|Methanobacteria	183925|Methanobacteria	C	Pyridine nucleotide-disulphide oxidoreductase	-	-	1.8.7.3,1.8.98.4,1.8.98.5,1.8.98.6	ko:K03388	ko00680,ko01100,ko01120,ko01200,map00680,map01100,map01120,map01200	M00356,M00357,M00563,M00567	R04540,R11928,R11931,R11943,R11944	RC00011	ko00000,ko00001,ko00002,ko01000	-	-	-	Fer4,Fer4_4,Pyr_redox_2
none	NODE_5505_length_966_cov_1_994401_g4649_i0_1	386456.JQKN01000003_gene422	8.28e-16	75.1	COG1145@1|root,arCOG02179@2157|Archaea,2XW8N@28890|Euryarchaeota,23PJX@183925|Methanobacteria	183925|Methanobacteria	C	4Fe-4S binding domain	-	-	-	-	-	-	-	-	-	-	-	-	Fer4,Fer4_7
none	NODE_5571_length_958_cov_2_610169_g4712_i0_1	386456.JQKN01000001_gene2273	6.41e-145	428.0	COG0480@1|root,arCOG01559@2157|Archaea,2XUMQ@28890|Euryarchaeota,23NSP@183925|Methanobacteria	183925|Methanobacteria	J	Catalyzes the GTP-dependent ribosomal translocation step during translation elongation. During this step, the ribosome changes from the pre-translocational (PRE) to the post- translocational (POST) state as the newly formed A-site-bound peptidyl-tRNA and P-site-bound deacylated tRNA move to the P and E sites, respectively. Catalyzes the coordinated movement of the two tRNA molecules, the mRNA and…	fusA	-	-	ko:K03234	ko04152,ko04921,map04152,map04921	-	-	-	ko00000,ko00001,ko03012,ko04147	-	-	-	EFG_C,EFG_II,EFG_IV,GTP_EFTU,GTP_EFTU_D2
none	NODE_5571_length_958_cov_2_610169_g4712_i0_2	1220534.B655_1642	2.04e-16	70.9	COG5256@1|root,arCOG01561@2157|Archaea	2157|Archaea	J	This protein promotes the GTP-dependent binding of aminoacyl-tRNA to the A-site of ribosomes during protein biosynthesis	tuf	GO:0005575,GO:0005622,GO:0005623,GO:0005737,GO:0044424,GO:0044464	-	ko:K03231	ko03013,ko05134,map03013,map05134	-	-	-	ko00000,ko00001,ko03012,ko03016,ko03019,ko04131,ko04147	-	-	-	GTP_EFTU,GTP_EFTU_D2,GTP_EFTU_D3
none	NODE_5645_length_950_cov_2_925884_g4780_i0_1	351160.LRC110	1.53e-54	186.0	COG2239@1|root,arCOG00634@2157|Archaea,2XWIB@28890|Euryarchaeota,2NA5Y@224756|Methanomicrobia	224756|Methanomicrobia	P	MgtE intracellular N domain	-	-	-	-	-	-	-	-	-	-	-	-	CBS,MgtE_N,PRC
none	NODE_5645_length_950_cov_2_925884_g4780_i0_2	304371.MCP_1805	7.54e-05	46.6	COG2239@1|root,arCOG00634@2157|Archaea,2XWIB@28890|Euryarchaeota,2NA5Y@224756|Methanomicrobia	224756|Methanomicrobia	P	MgtE intracellular N domain	-	-	-	-	-	-	-	-	-	-	-	-	CBS,MgtE_N,PRC
none	NODE_5645_length_950_cov_2_925884_g4780_i0_3	1041930.Mtc_1296	3.01e-08	53.9	COG1522@1|root,arCOG01580@2157|Archaea,2XZQD@28890|Euryarchaeota	28890|Euryarchaeota	K	helix_turn_helix ASNC type	-	-	-	ko:K03718	-	-	-	-	ko00000,ko03000	-	-	-	AsnC_trans_reg,HTH_24,HTH_AsnC-type
none	NODE_6124_length_904_cov_1_909747_g5235_i0_1	386456.JQKN01000007_gene3351	9.66e-133	394.0	COG1155@1|root,arCOG00868@2157|Archaea,2XT8I@28890|Euryarchaeota,23NK7@183925|Methanobacteria	183925|Methanobacteria	C	Produces ATP from ADP in the presence of a proton gradient across the membrane. The archaeal alpha chain is a catalytic subunit	atpA	-	3.6.3.14,3.6.3.15	ko:K02117	ko00190,ko01100,map00190,map01100	M00159	-	-	ko00000,ko00001,ko00002,ko01000	3.A.2.2,3.A.2.3	-	-	ATP-synt_ab,ATP-synt_ab_N,ATP-synt_ab_Xtn
none	NODE_6124_length_904_cov_1_909747_g5235_i0_2	1220534.B655_0739	1.58e-12	64.3	COG1155@1|root,arCOG00868@2157|Archaea,2XT8I@28890|Euryarchaeota,23NK7@183925|Methanobacteria	183925|Methanobacteria	C	Produces ATP from ADP in the presence of a proton gradient across the membrane. The archaeal alpha chain is a catalytic subunit	atpA	-	3.6.3.14,3.6.3.15	ko:K02117	ko00190,ko01100,map00190,map01100	M00159	-	-	ko00000,ko00001,ko00002,ko01000	3.A.2.2,3.A.2.3	-	-	ATP-synt_ab,ATP-synt_ab_N,ATP-synt_ab_Xtn
none	NODE_6556_length_866_cov_2_139975_g5650_i0_1	386456.JQKN01000001_gene2114	1.3e-52	185.0	COG1305@1|root,arCOG02165@2157|Archaea	2157|Archaea	E	PFAM Transglutaminase-like	-	-	-	-	-	-	-	-	-	-	-	-	DUF4015,PMBR,Transglut_core
none	NODE_7286_length_805_cov_1_759563_g6353_i0_1	1220534.B655_1636	9.41e-71	223.0	COG0086@1|root,arCOG04256@2157|Archaea,2XTJ6@28890|Euryarchaeota,23NJ1@183925|Methanobacteria	183925|Methanobacteria	K	DNA-dependent RNA polymerase catalyzes the transcription of DNA into RNA using the four ribonucleoside triphosphates as substrates	rpoA2	-	2.7.7.6	ko:K03042	ko00230,ko00240,ko01100,ko03020,map00230,map00240,map01100,map03020	M00184	R00435,R00441,R00442,R00443	RC02795	br01611,ko00000,ko00001,ko00002,ko01000,ko03021	-	-	-	RNA_pol_Rpb1_5
none	NODE_7286_length_805_cov_1_759563_g6353_i0_2	386456.JQKN01000001_gene2269	3.62e-59	183.0	COG1911@1|root,arCOG01752@2157|Archaea,2Y0CU@28890|Euryarchaeota,23P69@183925|Methanobacteria	183925|Methanobacteria	J	Belongs to the eukaryotic ribosomal protein eL30 family	rpl30e	-	-	ko:K02908	ko03010,map03010	M00177,M00179	-	-	br01610,ko00000,ko00001,ko00002,ko03011	-	-	-	Ribosomal_L7Ae
none	NODE_7286_length_805_cov_1_759563_g6353_i0_3	386456.JQKN01000001_gene2270	2.36e-08	52.4	COG0195@1|root,arCOG01760@2157|Archaea,2XYAY@28890|Euryarchaeota,23P28@183925|Methanobacteria	183925|Methanobacteria	K	Participates in transcription termination	nusA	-	-	ko:K02600	-	-	-	-	ko00000,ko03009,ko03021	-	-	-	KH_2
none	NODE_7618_length_783_cov_2_642254_g6678_i0_1	386456.JQKN01000001_gene1813	1.07e-56	193.0	COG0532@1|root,arCOG01560@2157|Archaea,2XU09@28890|Euryarchaeota,23NSX@183925|Methanobacteria	183925|Methanobacteria	J	Function in general translation initiation by promoting the binding of the formylmethionine-tRNA to ribosomes. Seems to function along with eIF-2	infB	-	-	ko:K03243	ko03013,map03013	-	-	-	ko00000,ko00001,ko03012	-	-	-	GTP_EFTU,GTP_EFTU_D2,GTP_EFTU_D4,IF-2
none	NODE_7899_length_762_cov_2_060958_g6945_i0_1	386456.JQKN01000008_gene1550	1.04e-77	254.0	COG1287@1|root,arCOG02044@2157|Archaea,2XU59@28890|Euryarchaeota,23NKH@183925|Methanobacteria	183925|Methanobacteria	M	PFAM Oligosaccharyl transferase STT3 subunit	-	-	2.4.99.18,2.4.99.21	ko:K07151,ko:K21306	ko00510,ko00513,ko01100,ko04141,map00510,map00513,map01100,map04141	M00072	R04216,R05976	RC00005,RC00482	ko00000,ko00001,ko00002,ko01000,ko01003	-	GT66	-	STT3
none	NODE_7899_length_762_cov_2_060958_g6945_i0_2	877455.Metbo_0534	2.63e-12	66.6	COG1287@1|root,arCOG02044@2157|Archaea,2XU59@28890|Euryarchaeota,23NKH@183925|Methanobacteria	183925|Methanobacteria	M	PFAM Oligosaccharyl transferase STT3 subunit	-	-	2.4.99.18,2.4.99.21	ko:K07151,ko:K21306	ko00510,ko00513,ko01100,ko04141,map00510,map00513,map01100,map04141	M00072	R04216,R05976	RC00005,RC00482	ko00000,ko00001,ko00002,ko01000,ko01003	-	GT66	-	STT3
none	NODE_8030_length_752_cov_2_243004_g7070_i0_1	386456.JQKN01000007_gene3352	2.25e-91	284.0	COG1156@1|root,arCOG00865@2157|Archaea,2XSYQ@28890|Euryarchaeota,23NSM@183925|Methanobacteria	183925|Methanobacteria	C	Produces ATP from ADP in the presence of a proton gradient across the membrane. The archaeal beta chain is a regulatory subunit	atpB	-	-	ko:K02118	ko00190,ko01100,map00190,map01100	M00159	-	-	ko00000,ko00001,ko00002	3.A.2.2,3.A.2.3	-	-	ATP-synt_ab,ATP-synt_ab_N
none	NODE_10167_length_635_cov_2_007117_g9081_i0_1	386456.JQKN01000008_gene1385	7.09e-36	128.0	COG1592@1|root,arCOG01097@2157|Archaea,2XWSA@28890|Euryarchaeota,23P2X@183925|Methanobacteria	183925|Methanobacteria	C	Rubrerythrin	-	-	-	-	-	-	-	-	-	-	-	-	Rubrerythrin
none	NODE_10167_length_635_cov_2_007117_g9081_i0_2	386456.JQKN01000008_gene1385	3.63e-46	153.0	COG1592@1|root,arCOG01097@2157|Archaea,2XWSA@28890|Euryarchaeota,23P2X@183925|Methanobacteria	183925|Methanobacteria	C	Rubrerythrin	-	-	-	-	-	-	-	-	-	-	-	-	Rubrerythrin
none	NODE_11955_length_560_cov_1_860370_g10852_i0_1	1220534.B655_0179	3.04e-19	88.6	COG1405@1|root,arCOG01981@2157|Archaea,2XT0Z@28890|Euryarchaeota,23NWZ@183925|Methanobacteria	183925|Methanobacteria	K	Stabilizes TBP binding to an archaeal box-A promoter. Also responsible for recruiting RNA polymerase II to the pre- initiation complex (DNA-TBP-TFIIB)	tfb	-	-	ko:K03124	ko03022,ko05169,ko05203,map03022,map05169,map05203	-	-	-	ko00000,ko00001,ko03021	-	-	-	TFIIB,TF_Zn_Ribbon
none	NODE_12191_length_551_cov_1_133891_g11086_i0_1	386456.JQKN01000001_gene1743	1.0699999999999999e-60	191.0	COG0256@1|root,arCOG04088@2157|Archaea,2XTWT@28890|Euryarchaeota,23P0B@183925|Methanobacteria	183925|Methanobacteria	J	This is one of the proteins that binds and probably mediates the attachment of the 5S RNA into the large ribosomal subunit, where it forms part of the central protuberance	rpl18	-	-	ko:K02881	ko03010,map03010	M00178,M00179	-	-	br01610,ko00000,ko00001,ko00002,ko03011	-	-	-	Ribosomal_L18_c,Ribosomal_L5e
none	NODE_12191_length_551_cov_1_133891_g11086_i0_2	386456.JQKN01000001_gene1742	2.32e-15	72.8	COG0098@1|root,arCOG04087@2157|Archaea,2XUQU@28890|Euryarchaeota,23NQT@183925|Methanobacteria	183925|Methanobacteria	J	With S4 and S12 plays an important role in translational accuracy	rps5	-	-	ko:K02988	ko03010,map03010	M00178,M00179	-	-	br01610,ko00000,ko00001,ko00002,ko03011	-	-	-	Ribosomal_S5,Ribosomal_S5_C
none	NODE_12191_length_551_cov_1_133891_g11086_i0_3	386456.JQKN01000001_gene1742	2.26e-09	56.2	COG0098@1|root,arCOG04087@2157|Archaea,2XUQU@28890|Euryarchaeota,23NQT@183925|Methanobacteria	183925|Methanobacteria	J	With S4 and S12 plays an important role in translational accuracy	rps5	-	-	ko:K02988	ko03010,map03010	M00178,M00179	-	-	br01610,ko00000,ko00001,ko00002,ko03011	-	-	-	Ribosomal_S5,Ribosomal_S5_C
none	NODE_14502_length_476_cov_1_813896_g13388_i0_1	386456.JQKN01000002_gene2495	1.51e-91	283.0	COG0459@1|root,arCOG01257@2157|Archaea,2XUDQ@28890|Euryarchaeota,23NWX@183925|Methanobacteria	183925|Methanobacteria	O	Belongs to the TCP-1 chaperonin family	-	-	-	ko:K22447	-	-	-	-	ko00000,ko03110	-	-	-	Cpn60_TCP1
none	NODE_15216_length_459_cov_2_015544_g14101_i0_1	386456.JQKN01000008_gene1414	4.91e-72	230.0	COG1746@1|root,arCOG04249@2157|Archaea,2XT5J@28890|Euryarchaeota,23NVX@183925|Methanobacteria	183925|Methanobacteria	J	Catalyzes the addition and repair of the essential 3'- terminal CCA sequence in tRNAs without using a nucleic acid template. Adds these three nucleotides in the order of C, C, and A to the tRNA nucleotide-73, using CTP and ATP as substrates and producing inorganic pyrophosphate	cca	-	2.7.7.72	ko:K07558	-	-	R09382,R09383,R09384,R09386	RC00078	ko00000,ko01000,ko03016	-	-	-	NTP_transf_2,tRNA_NucTransf2
none	NODE_15300_length_457_cov_1_984375_g14185_i0_1	386456.JQKN01000015_gene2931	5.180000000000001e-56	187.0	COG0151@1|root,arCOG04415@2157|Archaea,2XTRV@28890|Euryarchaeota,23NMV@183925|Methanobacteria	183925|Methanobacteria	F	Phosphoribosylglycinamide synthetase, ATP-grasp (A) domain	purD	-	6.3.4.13	ko:K01945	ko00230,ko01100,ko01110,ko01130,map00230,map01100,map01110,map01130	M00048	R04144	RC00090,RC00166	ko00000,ko00001,ko00002,ko01000	-	-	-	GARS_A,GARS_C,GARS_N
none	NODE_15300_length_457_cov_1_984375_g14185_i0_2	386456.JQKN01000015_gene2931	2.28e-16	77.8	COG0151@1|root,arCOG04415@2157|Archaea,2XTRV@28890|Euryarchaeota,23NMV@183925|Methanobacteria	183925|Methanobacteria	F	Phosphoribosylglycinamide synthetase, ATP-grasp (A) domain	purD	-	6.3.4.13	ko:K01945	ko00230,ko01100,ko01110,ko01130,map00230,map01100,map01110,map01130	M00048	R04144	RC00090,RC00166	ko00000,ko00001,ko00002,ko01000	-	-	-	GARS_A,GARS_C,GARS_N
none	NODE_15861_length_442_cov_1_257453_g14746_i0_1	386456.JQKN01000008_gene1418	3.34e-90	270.0	COG1830@1|root,arCOG04044@2157|Archaea,2XTBQ@28890|Euryarchaeota,23NT7@183925|Methanobacteria	183925|Methanobacteria	E	Catalyzes a transaldol reaction between 6-deoxy-5- ketofructose 1-phosphate (DKFP) and L-aspartate semialdehyde (ASA) with an elimination of hydroxypyruvaldehyde phosphate to yield 2- amino-3,7-dideoxy-D-threo-hept-6-ulosonate (ADH). Plays a key role in an alternative pathway of the biosynthesis of 3-dehydroquinate (DHQ), which is involved in the canonical pathway for the biosynthesis of aromatic…	aroA'	-	2.2.1.10,4.1.2.13	ko:K16306	ko00010,ko00030,ko00051,ko00400,ko00680,ko01100,ko01110,ko01120,ko01130,ko01200,ko01230,map00010,map00030,map00051,map00400,map00680,map01100,map01110,map01120,map01130,map01200,map01230	M00001	R01068,R01070,R02568,R08568	RC00438,RC00439,RC00721,RC02301	ko00000,ko00001,ko00002,ko01000	-	-	-	DeoC
none	NODE_16572_length_424_cov_1_752137_g15455_i0_1	1220534.B655_1350	1.87e-67	218.0	COG0215@1|root,arCOG00486@2157|Archaea,2XTRY@28890|Euryarchaeota,23NUS@183925|Methanobacteria	183925|Methanobacteria	J	Belongs to the class-I aminoacyl-tRNA synthetase family	cysS	-	6.1.1.16	ko:K01883	ko00970,map00970	M00359,M00360	R03650	RC00055,RC00523	ko00000,ko00001,ko00002,ko01000,ko01007,ko03016	-	-	-	DALR_2,tRNA-synt_1e,tRNA-synt_1g
none	NODE_17385_length_405_cov_3_078313_g16267_i0_1	386456.JQKN01000001_gene1732	1.9100000000000002e-56	178.0	COG0099@1|root,arCOG01722@2157|Archaea,2XWHE@28890|Euryarchaeota,23P1M@183925|Methanobacteria	183925|Methanobacteria	J	Located at the top of the head of the 30S subunit, it contacts several helices of the 16S rRNA. In the 70S ribosome it contacts the 23S rRNA (bridge B1a) and protein L5 of the 50S subunit (bridge B1b), connecting the 2 subunits	rps13	-	-	ko:K02952	ko03010,map03010	M00178,M00179	-	-	br01610,ko00000,ko00001,ko00002,ko03011	-	-	-	Ribosomal_S13
none	NODE_18741_length_380_cov_1_146580_g17621_i0_1	192952.MM_1101	1.3100000000000001e-43	155.0	COG0343@1|root,arCOG00989@2157|Archaea,2XTFH@28890|Euryarchaeota,2N9F2@224756|Methanomicrobia	224756|Methanomicrobia	J	Exchanges the guanine residue with 7-cyano-7- deazaguanine (preQ0) at position 15 in the dihydrouridine loop (D- loop) of archaeal tRNAs	tgtA	-	2.4.2.48	ko:K18779	-	-	-	-	ko00000,ko01000,ko03016	-	-	-	TGT
none	NODE_19036_length_375_cov_2_377483_g17916_i0_1	386456.JQKN01000007_gene3189	1.05e-50	175.0	COG0294@1|root,arCOG01978@2157|Archaea,2XTEW@28890|Euryarchaeota,23NP0@183925|Methanobacteria	183925|Methanobacteria	H	TIGRFAM dihydropteroate synthase-related protein	-	-	-	-	-	-	-	-	-	-	-	-	DUF4346,Pterin_bind
none	NODE_19636_length_365_cov_2_253425_g18516_i0_1	1220534.B655_0070	2.58e-16	77.0	COG3874@1|root,arCOG04972@2157|Archaea,2Y18Q@28890|Euryarchaeota,23P94@183925|Methanobacteria	183925|Methanobacteria	S	Sporulation protein YtfJ (Spore_YtfJ)	-	-	-	-	-	-	-	-	-	-	-	-	Spore_YtfJ
none	NODE_4495_length_1091_cov_2_571709_g3693_i0_1	868131.MSWAN_0116	9.01e-34	129.0	COG0243@1|root,arCOG01492@2157|Archaea,2Y8AB@28890|Euryarchaeota,23PDM@183925|Methanobacteria	183925|Methanobacteria	C	Molybdopterin oxidoreductase Fe4S4 domain	-	-	1.17.1.9	ko:K00123	ko00630,ko00680,ko01100,ko01120,ko01200,map00630,map00680,map01100,map01120,map01200	-	R00519	RC02796	ko00000,ko00001,ko01000	-	-	-	Molybdop_Fe4S4,Molybdopterin,Molydop_binding
none	NODE_4495_length_1091_cov_2_571709_g3693_i0_2	868131.MSWAN_0116	2.69e-183	526.0	COG0243@1|root,arCOG01492@2157|Archaea,2Y8AB@28890|Euryarchaeota,23PDM@183925|Methanobacteria	183925|Methanobacteria	C	Molybdopterin oxidoreductase Fe4S4 domain	-	-	1.17.1.9	ko:K00123	ko00630,ko00680,ko01100,ko01120,ko01200,map00630,map00680,map01100,map01120,map01200	-	R00519	RC02796	ko00000,ko00001,ko01000	-	-	-	Molybdop_Fe4S4,Molybdopterin,Molydop_binding
none	NODE_25267_length_301_cov_1_758772_g24147_i0_1	386456.JQKN01000024_gene575	2.5600000000000003e-47	166.0	COG0674@1|root,arCOG01606@2157|Archaea,2XSUJ@28890|Euryarchaeota,23PZ0@183925|Methanobacteria	183925|Methanobacteria	C	TIGRFAM 2-oxoacid acceptor oxidoreductase, alpha subunit	-	-	-	-	-	-	-	-	-	-	-	-	POR,POR_N
none	NODE_25437_length_300_cov_1_444934_g24317_i0_1	5888.CAK72616	5e-17	82.4	COG0474@1|root,KOG0204@2759|Eukaryota,3ZAUE@5878|Ciliophora	2759|Eukaryota	P	Belongs to the cation transport ATPase (P-type) (TC 3.A.3) family	-	-	3.6.3.8	ko:K01537,ko:K05850	ko04020,ko04022,ko04024,ko04261,ko04925,ko04970,ko04972,map04020,map04022,map04024,map04261,map04925,map04970,map04972	-	-	-	ko00000,ko00001,ko01000	3.A.3.2	-	-	Cation_ATPase,Cation_ATPase_C,Cation_ATPase_N,E1-E2_ATPase,Hydrolase,Hydrolase_3

## Sheet: Metagenomic contigs annotated
methanogenesis_modules	contig	seed_ortholog	evalue	score	eggNOG_OGs	max_annot_lvl	COG_category	Description	Preferred_name	GOs	EC	KEGG_ko	KEGG_Pathway	KEGG_Module	KEGG_Reaction	KEGG_rclass	BRITE	KEGG_TC	CAZy	BiGG_Reaction	PFAMs
Formylmethanofuran dehydrogenase (Fmd/Fwd)	NODE_18964_length_548_cov_0.334917_1	1220534.B655_2242	6.080000000000001e-27	105.0	COG1145@1|root,arCOG02180@2157|Archaea	2157|Archaea	C	PFAM 4Fe-4S ferredoxin, iron-sulfur binding domain protein	fwdF	-	1.1.98.4	ko:K00205,ko:K02573,ko:K22174	ko00680,ko01100,ko01120,ko01200,map00680,map01100,map01120,map01200	M00567	R03015,R08060,R11743	RC00197,RC00323	ko00000,ko00001,ko00002,ko01000	-	-	-	Fer4,Fer4_4,Fer4_7
Formyltransferase (Ftr)	NODE_18624_length_559_cov_0.493056_1	386456.JQKN01000003_gene420	1.31e-113	332.0	COG2037@1|root,arCOG02695@2157|Archaea,2XUV2@28890|Euryarchaeota,23NJN@183925|Methanobacteria	183925|Methanobacteria	C	Formylmethanofuran-tetrahydromethanopterin formyltransferase	ftr1	-	2.3.1.101	ko:K00672	ko00680,ko01100,ko01120,ko01200,map00680,map01100,map01120,map01200	M00567	R03390	RC00197,RC00870,RC02881	ko00000,ko00001,ko00002,ko01000	-	-	-	FTR,FTR_C
Hydrogenase maturation proteins (HypABCDEF)	NODE_6331_length_1994_cov_0.610605_3	386456.JQKN01000002_gene2658	2.2900000000000002e-29	109.0	COG0680@1|root,arCOG04429@2157|Archaea,2XXAF@28890|Euryarchaeota,23P79@183925|Methanobacteria	183925|Methanobacteria	C	hydrogenase maturation protease HycI	hycI	-	3.4.23.51	ko:K08315	-	-	-	-	ko00000,ko01000,ko01002	-	-	-	HycI
Hydrogenase maturation proteins (HypABCDEF)	NODE_2025_length_7422_cov_3.820288_4	386456.JQKN01000008_gene1564	1.02e-40	135.0	COG0298@1|root,arCOG04427@2157|Archaea,2Y0AJ@28890|Euryarchaeota,23P77@183925|Methanobacteria	183925|Methanobacteria	O	Hydrogenase assembly chaperone hypC hupF	hypC	-	-	ko:K04653	-	-	-	-	ko00000	-	-	-	HupF_HypC
Hydrogenases (NiFe / F420 / Eha/Ehb / Frh/Vhu/Vhc)	NODE_22918_length_450_cov_0.591331_1	386456.JQKN01000012_gene1019	1.45e-91	278.0	COG0374@1|root,arCOG01549@2157|Archaea,2XSXP@28890|Euryarchaeota,23NW4@183925|Methanobacteria	183925|Methanobacteria	C	Belongs to the NiFe NiFeSe hydrogenase large subunit family	frhA	-	1.12.98.1	ko:K00440	ko00680,ko01100,ko01120,map00680,map01100,map01120	-	R03025	RC02628	ko00000,ko00001,ko01000	-	-	-	NiFeSe_Hases
Hydrogenases (NiFe / F420 / Eha/Ehb / Frh/Vhu/Vhc)	NODE_21375_length_485_cov_0.363128_1	386456.JQKN01000003_gene415	2.03e-94	285.0	COG3261@1|root,arCOG01547@2157|Archaea,2Y7K6@28890|Euryarchaeota	28890|Euryarchaeota	C	PFAM NADH-ubiquinone oxidoreductase, chain 49kDa	ehaO	-	-	ko:K14106	-	-	-	-	ko00000	-	-	-	Complex1_49kDa,NiFeSe_Hases
Hydrogenases (NiFe / F420 / Eha/Ehb / Frh/Vhu/Vhc)	NODE_9763_length_1186_cov_0.525968_2	386456.JQKN01000007_gene3179	4.36e-25	101.0	COG1877@1|root,arCOG01216@2157|Archaea,2Y7FW@28890|Euryarchaeota	28890|Euryarchaeota	G	Removes the phosphate from trehalose 6-phosphate to produce free trehalose	-	-	3.1.3.12	ko:K01087	ko00500,ko01100,map00500,map01100	-	R02778	RC00017	ko00000,ko00001,ko01000	-	-	-	Trehalose_PPase
Hydrogenases (NiFe / F420 / Eha/Ehb / Frh/Vhu/Vhc)	NODE_965_length_14917_cov_2.021231_2	386456.JQKN01000016_gene912	3.08e-120	347.0	COG1707@1|root,arCOG00813@2157|Archaea,2XT8A@28890|Euryarchaeota,23P1F@183925|Methanobacteria	183925|Methanobacteria	S	PFAM amino acid-binding ACT domain protein	ehbQ	-	-	ko:K06862	-	-	-	-	ko00000	-	-	-	ACT_4
Methyl-coenzyme M reductase (McrABG/D)	NODE_8281_length_1447_cov_0.601515_1	386456.JQKN01000013_gene3019	1.8e-75	234.0	COG4052@1|root,arCOG03226@2157|Archaea,2XTWG@28890|Euryarchaeota,23NNP@183925|Methanobacteria	183925|Methanobacteria	S	Methyl-coenzyme M reductase operon protein C	-	-	-	-	-	-	-	-	-	-	-	-	MCR_C
	NODE_24393_length_423_cov_0.945946_1	386456.JQKN01000023_gene80	5.24e-80	243.0	COG2520@1|root,arCOG00033@2157|Archaea,2Y83R@28890|Euryarchaeota,23PX8@183925|Methanobacteria	183925|Methanobacteria	J	S-adenosyl-L-methionine-dependent transferase that acts as a component of the wyosine derivatives biosynthesis pathway. Catalyzes the transfer of the alpha-amino-alpha-carboxypropyl (acp) group from S-adenosyl-L-methionine to 4-demethylwyosine (imG-14), forming 7-aminocarboxypropyl-demethylwyosine (wybutosine-86) at position 37 of tRNA(Phe)	taw2	-	2.5.1.114	ko:K07055	-.1	-.2	-.3	-.4	ko00000,ko01000,ko03016	-.5	-.6	-.7	Met_10
	NODE_23781_length_434_cov_0.534202_1	386456.JQKN01000016_gene924	6.120000000000001e-75	236.0	COG2303@1|root,arCOG02232@2157|Archaea,2Y89C@28890|Euryarchaeota,23NTI@183925|Methanobacteria	183925|Methanobacteria	E	PFAM Glucose-methanol-choline oxidoreductase, N-terminal	-	-	-	-	-	-	-	-	-	-	-	-	GMC_oxred_N
	NODE_23608_length_437_cov_0.612903_1	1168034.FH5T_14825	5.7599999999999995e-67	213.0	COG0701@1|root,COG0701@2|Bacteria,4NDUJ@976|Bacteroidetes,2FNF8@200643|Bacteroidia	976|Bacteroidetes	P	Psort location CytoplasmicMembrane, score 10.00	-	-	-	ko:K07089	-	-	-	-	ko00000	-	-	-	ArsP_1
	NODE_23195_length_445_cov_0.374214_1	386456.JQKN01000001_gene2240	1.58e-86	264.0	COG0674@1|root,arCOG01607@2157|Archaea,2Y7K5@28890|Euryarchaeota,23NP4@183925|Methanobacteria	183925|Methanobacteria	C	ferredoxin oxidoreductase	korA	-	1.2.7.11,1.2.7.3	ko:K00174	ko00010,ko00020,ko00620,ko00650,ko00720,ko01100,ko01120,ko01130,ko01200,map00010,map00020,map00620,map00650,map00720,map01100,map01120,map01130,map01200	M00009,M00011,M00173,M00620	R01196,R01197	RC00004,RC02742,RC02833	br01601,ko00000,ko00001,ko00002,ko01000	-	-	-	PFOR_II,POR_N
	NODE_23010_length_448_cov_0.588785_1	386456.JQKN01000007_gene3188	3.55e-93	279.0	COG0037@1|root,arCOG00042@2157|Archaea,2XTEZ@28890|Euryarchaeota,23NX6@183925|Methanobacteria	183925|Methanobacteria	D	PP-loop family	-	-	-	-	-	-	-	-	-	-	-	-	ATP_bind_3,zn-ribbon_14
	NODE_22951_length_449_cov_0.667702_1	877455.Metbo_0144	5.09e-47	158.0	COG4871@1|root,arCOG00297@2157|Archaea,2XZDM@28890|Euryarchaeota	28890|Euryarchaeota	K	Putative Fe-S cluster	-	-	-	-	-	-	-	-	-	-	-	-	FeS,HTH_20
	NODE_22927_length_450_cov_0.396285_1	386456.JQKN01000001_gene2320	1.13e-65	205.0	COG1309@1|root,arCOG02645@2157|Archaea,2XVKI@28890|Euryarchaeota,23PWA@183925|Methanobacteria	183925|Methanobacteria	K	Bacterial regulatory proteins, tetR family	-	-	-	-	-	-	-	-	-	-	-	-	TetR_N
	NODE_22772_length_453_cov_0.524540_1	868131.MSWAN_1562	1.19e-81	248.0	COG1798@1|root,arCOG04161@2157|Archaea,2XV63@28890|Euryarchaeota,23NX5@183925|Methanobacteria	183925|Methanobacteria	J	S-adenosyl-L-methionine-dependent methyltransferase that catalyzes the trimethylation of the amino group of the modified target histidine residue in translation elongation factor 2 (EF- 2), to form an intermediate called diphthine. The three successive methylation reactions represent the second step of diphthamide biosynthesis	dphB	-	2.1.1.98	ko:K20215	-	-	R04481,R08468,R08469,R10306	RC00003,RC00190,RC01155,RC02136,RC02308	ko00000,ko01000	-	-	-	TP_methylase
	NODE_22510_length_459_cov_0.352410_1	1220534.B655_1988	4.86e-90	268.0	COG2043@1|root,arCOG02289@2157|Archaea,2Y4UM@28890|Euryarchaeota	28890|Euryarchaeota	S	Uncharacterised ArCR, COG2043	-	-	-	-	-	-	-	-	-	-	-	-	DUF169
	NODE_22470_length_460_cov_0.204204_1	386456.JQKN01000002_gene2408	1.64e-69	224.0	arCOG00144@1|root,arCOG00144@2157|Archaea,2XWMT@28890|Euryarchaeota	28890|Euryarchaeota	G	Major facilitator superfamily	-	-	-	-	-	-	-	-	-	-	-	-	MFS_1
	NODE_22372_length_462_cov_0.367164_1	877455.Metbo_2407	5.95e-78	239.0	COG1013@1|root,arCOG01599@2157|Archaea,2XUSE@28890|Euryarchaeota,23NM1@183925|Methanobacteria	183925|Methanobacteria	C	PFAM Thiamine pyrophosphate enzyme, C-terminal	korB	-	1.2.7.11,1.2.7.3	ko:K00175	ko00010,ko00020,ko00620,ko00650,ko00720,ko01100,ko01120,ko01130,ko01200,map00010,map00020,map00620,map00650,map00720,map01100,map01120,map01130,map01200	M00009,M00011,M00173,M00620	R01196,R01197	RC00004,RC02742,RC02833	br01601,ko00000,ko00001,ko00002,ko01000	-	-	-	TPP_enzyme_C
	NODE_22013_length_470_cov_0.408163_1	386456.JQKN01000001_gene1835	7.92e-82	246.0	COG1458@1|root,arCOG00720@2157|Archaea,2XUK7@28890|Euryarchaeota	28890|Euryarchaeota	V	Belongs to the UPF0278 family	-	-	-	ko:K09006	-	-	-	-	ko00000	-	-	-	PIN_5
	NODE_21673_length_478_cov_0.470085_1	386456.JQKN01000002_gene2758	2.62e-100	304.0	COG0466@1|root,arCOG02162@2157|Archaea,2XVMC@28890|Euryarchaeota,23PXW@183925|Methanobacteria	183925|Methanobacteria	O	Magnesium chelatase, subunit ChlI	-	-	3.4.21.53	ko:K01338	ko04112,map04112	-	-	-	ko00000,ko00001,ko01000,ko01002	-	-	-	AAA_32,Mg_chelatase,Sigma54_activat
	NODE_21274_length_487_cov_0.705556_1	386456.JQKN01000018_gene593	1.5899999999999998e-67	215.0	COG2073@1|root,arCOG00651@2157|Archaea,2XTVD@28890|Euryarchaeota,23PDH@183925|Methanobacteria	183925|Methanobacteria	H	Cobalamin synthesis G C-terminus	cbiG	-	3.7.1.12	ko:K02189	ko00860,ko01100,map00860,map01100	-	R07772	RC01545,RC02097	ko00000,ko00001,ko01000	-	-	-	CbiG_C,CbiG_N
	NODE_21160_length_490_cov_1.033058_1	40215.BBOS01000012_gene2970	5.5700000000000004e-105	311.0	COG1088@1|root,COG1088@2|Bacteria,1MU5E@1224|Proteobacteria,1RP7G@1236|Gammaproteobacteria,3NIR1@468|Moraxellaceae	1236|Gammaproteobacteria	M	RmlD substrate binding domain	rfbB	GO:0000271,GO:0003674,GO:0003824,GO:0005488,GO:0005515,GO:0005575,GO:0005622,GO:0005623,GO:0005737,GO:0005829,GO:0005975,GO:0005976,GO:0006139,GO:0006629,GO:0006725,GO:0006807,GO:0008150,GO:0008152,GO:0008460,GO:0008610,GO:0008653,GO:0009058,GO:0009059,GO:0009103,GO:0009225,GO:0009226,GO:0009987,GO:0016051,GO:0016829,GO:0016835,GO:0016836,GO:0018130,GO:0019438,GO:0033692,GO:0034637,GO:0034641,GO:…	4.2.1.46	ko:K01710	ko00521,ko00523,ko00525,ko01055,ko01130,map00521,map00523,map00525,map01055,map01130	M00793	R06513	RC00402	ko00000,ko00001,ko00002,ko01000	-	-	iB21_1397.B21_01936,iECBD_1354.ECBD_1614,iECB_1328.ECB_01947,iECD_1391.ECD_01947,iECIAI39_1322.ECIAI39_0974,iECO26_1355.ECO26_2952,iECSF_1327.ECSF_1930	GDP_Man_Dehyd
	NODE_21054_length_493_cov_0.587432_1	386456.JQKN01000001_gene2343	5.3300000000000005e-86	261.0	COG0492@1|root,arCOG01296@2157|Archaea,2XTJW@28890|Euryarchaeota,23PBJ@183925|Methanobacteria	183925|Methanobacteria	O	Pyridine nucleotide-disulphide oxidoreductase	trxB	-	1.8.1.9	ko:K00384	ko00450,map00450	-	R02016,R03596,R09372	RC00013,RC02518,RC02873	ko00000,ko00001,ko01000	-	-	-	Pyr_redox_2
	NODE_20804_length_499_cov_0.693548_1	386456.JQKN01000011_gene821	7.41e-55	182.0	arCOG06495@1|root,arCOG06495@2157|Archaea,2XZ2I@28890|Euryarchaeota,23P4T@183925|Methanobacteria	183925|Methanobacteria	-	-	-	-	-	-	-	-	-	-	-	-	-	-	-
	NODE_20820_length_499_cov_0.387097_1	386456.JQKN01000007_gene3330	1.3e-92	276.0	COG1712@1|root,arCOG00254@2157|Archaea,2XUNA@28890|Euryarchaeota,23NXM@183925|Methanobacteria	183925|Methanobacteria	H	Specifically catalyzes the NAD or NADP-dependent dehydrogenation of L-aspartate to iminoaspartate	nadX	-	1.4.1.21	ko:K06989	ko00760,ko01100,map00760,map01100	-	R07407,R07410	RC02566	ko00000,ko00001,ko01000	-	-	-	DUF108,NAD_binding_3
	NODE_20475_length_507_cov_0.510526_1	386456.JQKN01000002_gene2844	8.730000000000001e-59	193.0	COG0577@1|root,arCOG02312@2157|Archaea,2XUEE@28890|Euryarchaeota	28890|Euryarchaeota	V	ABC-type antimicrobial peptide transport system, permease component	-	GO:0005575,GO:0005623,GO:0005886,GO:0016020,GO:0044464,GO:0071944	-	ko:K02004	-	M00258	-	-	ko00000,ko00002,ko02000	3.A.1	-	-	FtsX,MacB_PCD
	NODE_20375_length_510_cov_0.308094_1	386456.JQKN01000013_gene3009	1.4699999999999999e-89	270.0	COG0037@1|root,arCOG00042@2157|Archaea,2XTPY@28890|Euryarchaeota,23NSQ@183925|Methanobacteria	183925|Methanobacteria	D	PP-loop family	-	-	-	-	-	-	-	-	-	-	-	-	ATP_bind_3
	NODE_20014_length_519_cov_0.405612_1	386456.JQKN01000017_gene836	1.1900000000000001e-64	209.0	COG1085@1|root,arCOG00420@2157|Archaea,2Y3A2@28890|Euryarchaeota	28890|Euryarchaeota	C	UDP-glucose:hexose-1-phosphate uridylyltransferase activity	-	-	-	-	-	-	-	-	-	-	-	-	-
	NODE_19813_length_524_cov_0.299748_1	386456.JQKN01000005_gene447	7.68e-86	259.0	COG0289@1|root,arCOG04393@2157|Archaea,2XTJU@28890|Euryarchaeota,23NSH@183925|Methanobacteria	183925|Methanobacteria	E	Catalyzes the conversion of 4-hydroxy- tetrahydrodipicolinate (HTPA) to tetrahydrodipicolinate	dapB	-	1.17.1.8	ko:K00215	ko00261,ko00300,ko01100,ko01110,ko01120,ko01130,ko01230,map00261,map00300,map01100,map01110,map01120,map01130,map01230	M00016,M00525,M00526,M00527	R04198,R04199	RC00478	ko00000,ko00001,ko00002,ko01000	-	-	-	DapB_C,DapB_N
	NODE_19583_length_530_cov_0.642680_1	386456.JQKN01000010_gene682	7.74e-55	183.0	arCOG06480@1|root,arCOG06480@2157|Archaea,2Y408@28890|Euryarchaeota,23PP7@183925|Methanobacteria	183925|Methanobacteria	-	-	-	-	-	-	-	-	-	-	-	-	-	-	-
	NODE_19527_length_532_cov_0.251852_1	386456.JQKN01000008_gene1428	3.76e-90	269.0	COG0120@1|root,arCOG01122@2157|Archaea,2XTXI@28890|Euryarchaeota,23PER@183925|Methanobacteria	183925|Methanobacteria	G	Catalyzes the reversible conversion of ribose-5- phosphate to ribulose 5-phosphate	rpiA	-	5.3.1.6	ko:K01807	ko00030,ko00710,ko01100,ko01110,ko01120,ko01130,ko01200,ko01230,map00030,map00710,map01100,map01110,map01120,map01130,map01200,map01230	M00004,M00007,M00165,M00167,M00580	R01056	RC00434	ko00000,ko00001,ko00002,ko01000	-	-	-	Rib_5-P_isom_A
	NODE_19277_length_539_cov_0.388350_1	386456.JQKN01000002_gene2751	1.04e-124	360.0	COG1405@1|root,arCOG01981@2157|Archaea,2XT0Z@28890|Euryarchaeota,23NWZ@183925|Methanobacteria	183925|Methanobacteria	K	Stabilizes TBP binding to an archaeal box-A promoter. Also responsible for recruiting RNA polymerase II to the pre- initiation complex (DNA-TBP-TFIIB)	tfb	-	-	ko:K03124	ko03022,ko05169,ko05203,map03022,map05169,map05203	-	-	-	ko00000,ko00001,ko03021	-	-	-	TFIIB,TF_Zn_Ribbon
	NODE_19109_length_544_cov_0.455635_1	1220534.B655_1327	6.03e-81	244.0	COG0716@1|root,arCOG00519@2157|Archaea,2XXTN@28890|Euryarchaeota	28890|Euryarchaeota	C	Flavodoxin	-	GO:0000166,GO:0003674,GO:0003824,GO:0004729,GO:0005488,GO:0005575,GO:0005622,GO:0005623,GO:0005737,GO:0005829,GO:0006725,GO:0006778,GO:0006779,GO:0006783,GO:0006807,GO:0008150,GO:0008152,GO:0009058,GO:0009987,GO:0010181,GO:0016491,GO:0016627,GO:0016634,GO:0016635,GO:0018130,GO:0019438,GO:0032553,GO:0033013,GO:0033014,GO:0034641,GO:0036094,GO:0042168,GO:0042440,GO:0043167,GO:0043168,GO:0044237,GO:…	-	-	-	-	-	-	-	-	-	-	Flavodoxin_3,Flavodoxin_5
	NODE_18966_length_548_cov_0.301663_1	386456.JQKN01000001_gene1642	2.7e-102	303.0	COG1899@1|root,arCOG04142@2157|Archaea,2XSTD@28890|Euryarchaeota,23NS4@183925|Methanobacteria	183925|Methanobacteria	O	Deoxyhypusine synthase	dys	-	2.5.1.46	ko:K00809	-	-	-	-	ko00000,ko01000	-	-	-	DS
	NODE_18917_length_549_cov_0.672986_1	386456.JQKN01000001_gene1745	7.88e-07	47.8	COG1717@1|root,arCOG00781@2157|Archaea,2XSZ4@28890|Euryarchaeota,23P55@183925|Methanobacteria	183925|Methanobacteria	J	ribosomal protein	-	-	-	ko:K02912	ko03010,map03010	M00177,M00179	-	-	br01610,ko00000,ko00001,ko00002,ko03011	-	-	-	Ribosomal_L32e
	NODE_18917_length_549_cov_0.672986_2	386456.JQKN01000001_gene1746	6.0599999999999994e-89	263.0	COG0097@1|root,arCOG04090@2157|Archaea,2XTIS@28890|Euryarchaeota,23PAC@183925|Methanobacteria	183925|Methanobacteria	J	This protein binds to the 23S rRNA, and is important in its secondary structure. It is located near the subunit interface in the base of the L7 L12 stalk, and near the tRNA binding site of the peptidyltransferase center	rpl6	-	-	ko:K02933	ko03010,map03010	M00178,M00179	-	-	br01610,ko00000,ko00001,ko00002,ko03011	-	-	-	Ribosomal_L6
	NODE_18885_length_550_cov_0.612293_1	386456.JQKN01000001_gene1793	1.61e-63	198.0	COG1881@1|root,arCOG04702@2157|Archaea,2XXMX@28890|Euryarchaeota	28890|Euryarchaeota	S	COG1881 Phospholipid-binding protein	pebP	-	-	ko:K06910	-	-	-	-	ko00000	-	-	-	PBP
	NODE_18890_length_550_cov_0.449173_1	386456.JQKN01000001_gene2213	3.3999999999999997e-96	283.0	COG2048@1|root,arCOG00342@2157|Archaea,2XUTV@28890|Euryarchaeota	28890|Euryarchaeota	C	PFAM Cysteine-rich	-	-	1.8.7.3,1.8.98.4,1.8.98.5,1.8.98.6	ko:K03389,ko:K22481	ko00680,ko01100,ko01120,ko01200,map00680,map01100,map01120,map01200	M00356,M00357,M00563,M00567	R04540,R11928,R11931,R11943,R11944	RC00011	ko00000,ko00001,ko00002,ko01000	-	-	iAF692.Mbar_A1954	CCG
	NODE_18280_length_570_cov_0.638826_1	386456.JQKN01000017_gene835	3.63e-96	293.0	COG0607@1|root,arCOG00517@1|root,arCOG00517@2157|Archaea,arCOG02021@2157|Archaea,2XSV0@28890|Euryarchaeota	28890|Euryarchaeota	P	COG0607 Rhodanese-related sulfurtransferase	-	-	2.8.1.1,2.8.1.2,3.1.2.6	ko:K01011,ko:K01069	ko00270,ko00620,ko00920,ko01100,ko01120,ko04122,map00270,map00620,map00920,map01100,map01120,map04122	-	R01736,R01931,R03105,R03106	RC00004,RC00137,RC00214	ko00000,ko00001,ko01000	-	-	-	Lactamase_B,Rhodanese
	NODE_18236_length_572_cov_0.584270_1	386456.JQKN01000001_gene1941	1.89e-69	220.0	COG0182@1|root,arCOG01123@2157|Archaea,2Y86P@28890|Euryarchaeota,23NMI@183925|Methanobacteria	183925|Methanobacteria	J	Catalyzes the interconversion of methylthioribose-1- phosphate (MTR-1-P) into methylthioribulose-1-phosphate (MTRu-1- P)	-	-	5.3.1.23	ko:K08963	ko00270,ko01100,map00270,map01100	M00034	R04420	RC01151	ko00000,ko00001,ko00002,ko01000	-	-	-	IF-2B
	NODE_18051_length_578_cov_0.968958_1	386456.JQKN01000001_gene1676	3.72e-91	271.0	COG1500@1|root,arCOG04187@2157|Archaea,2XTNH@28890|Euryarchaeota,23NNI@183925|Methanobacteria	183925|Methanobacteria	J	Shwachman-Bodian-Diamond syndrome (SBDS) protein	-	-	-	ko:K14574	ko03008,map03008	-	-	-	ko00000,ko00001,ko03009	-	-	-	SBDS,SBDS_C
	NODE_18065_length_578_cov_0.518847_1	386456.JQKN01000008_gene1443	8.35e-83	250.0	COG0450@1|root,arCOG00312@2157|Archaea,2XTKD@28890|Euryarchaeota	28890|Euryarchaeota	O	Thiol-specific peroxidase that catalyzes the reduction of hydrogen peroxide and organic hydroperoxides to water and alcohols, respectively. Plays a role in cell protection against oxidative stress by detoxifying peroxides	-	GO:0003674,GO:0003824,GO:0008150,GO:0008152,GO:0009628,GO:0009636,GO:0009987,GO:0016209,GO:0016491,GO:0016684,GO:0042221,GO:0050896,GO:0051716,GO:0051920,GO:0055114,GO:0070482,GO:0070887,GO:0071453,GO:0097237,GO:0098754,GO:0098869,GO:1990748	1.11.1.15	ko:K03386	ko04214,map04214	-	-	-	ko00000,ko00001,ko01000,ko04147	-	-	-	1-cysPrx_C,AhpC-TSA
	NODE_17851_length_586_cov_0.520697_1	386456.JQKN01000001_gene1778	2.02e-71	221.0	COG1392@1|root,arCOG02640@2157|Archaea,2XWHY@28890|Euryarchaeota	28890|Euryarchaeota	K	Phosphate transport regulator	-	-	-	ko:K07220	-	-	-	-	ko00000	-	-	-	PhoU_div
	NODE_17853_length_586_cov_0.464052_1	1123355.JHYO01000001_gene3170	1.4399999999999998e-30	120.0	COG0463@1|root,COG0463@2|Bacteria,1R1YK@1224|Proteobacteria,2UDJK@28211|Alphaproteobacteria,3719Z@31993|Methylocystaceae	28211|Alphaproteobacteria	M	Glycosyltransferase like family 2	-	-	-	-	-	-	-	-	-	-	-	-	Glycos_transf_2
	NODE_17648_length_593_cov_1.060086_1	386456.JQKN01000001_gene1939	3.1099999999999997e-89	265.0	COG4051@1|root,arCOG04904@2157|Archaea,2XZNG@28890|Euryarchaeota,23P52@183925|Methanobacteria	183925|Methanobacteria	S	Methanogenesis marker protein 17	-	-	-	-	-	-	-	-	-	-	-	-	DUF2113
	NODE_17613_length_595_cov_0.418803_1	386456.JQKN01000002_gene2406	5.35e-78	243.0	COG0826@1|root,arCOG03202@2157|Archaea,2XVHF@28890|Euryarchaeota,23NUE@183925|Methanobacteria	183925|Methanobacteria	O	peptidase	-	-	-	ko:K08303	ko05120,map05120	-	-	-	ko00000,ko00001,ko01000,ko01002	-	-	-	Peptidase_U32
	NODE_16509_length_639_cov_0.292969_1	386456.JQKN01000001_gene2333	1.9e-121	354.0	COG1131@1|root,arCOG00194@2157|Archaea,2XTJV@28890|Euryarchaeota	28890|Euryarchaeota	E	ABC-type multidrug transport system, ATPase component	-	-	-	ko:K01990	-	M00254	-	-	ko00000,ko00002,ko02000	3.A.1	-	-	ABC_tran,DUF4162
	NODE_16068_length_659_cov_0.484962_1	386456.JQKN01000017_gene876	8.48e-113	333.0	COG1267@1|root,COG1865@1|root,arCOG01869@2157|Archaea,arCOG01870@2157|Archaea,2XZTX@28890|Euryarchaeota,23P8Z@183925|Methanobacteria	183925|Methanobacteria	I	PFAM Phosphatidylglycerophosphatase A	cobZ	-	-	-	-	-	-	-	-	-	-	-	CbiZ,PgpA
	NODE_16030_length_660_cov_0.803002_1	386456.JQKN01000011_gene728	6.78e-127	372.0	COG2133@1|root,arCOG03597@1|root,arCOG02796@2157|Archaea,arCOG03597@2157|Archaea	2157|Archaea	S	Protein of unknown function (DUF2769)	-	-	-	-	-	-	-	-	-	-	-	-	DUF2769,GSDH
	NODE_15965_length_663_cov_0.628731_1	386456.JQKN01000015_gene2920	8.52e-130	373.0	COG0496@1|root,arCOG02303@2157|Archaea,2XT5R@28890|Euryarchaeota,23NXQ@183925|Methanobacteria	183925|Methanobacteria	S	Nucleotidase that shows phosphatase activity on nucleoside 5'-monophosphates	surE	-	3.1.3.5	ko:K03787	ko00230,ko00240,ko00760,ko01100,ko01110,map00230,map00240,map00760,map01100,map01110	-	R00183,R00511,R00963,R01126,R01227,R01569,R01664,R01968,R02088,R02102,R02323,R02719,R03346	RC00017	ko00000,ko00001,ko01000	-	-	-	SurE
	NODE_15911_length_666_cov_0.628942_1	386456.JQKN01000003_gene359	8.74e-69	218.0	COG0053@1|root,arCOG01474@2157|Archaea,2XU96@28890|Euryarchaeota,23PIB@183925|Methanobacteria	183925|Methanobacteria	P	Cation efflux family	-	-	-	-	-	-	-	-	-	-	-	-	Cation_efflux,ZT_dimer
	NODE_15869_length_668_cov_0.393715_1	386456.JQKN01000001_gene1911	8.639999999999999e-94	295.0	arCOG02348@1|root,arCOG07605@1|root,arCOG02348@2157|Archaea,arCOG07605@2157|Archaea	2157|Archaea	T	Histidine kinase-like ATPases	-	-	-	-	-	-	-	-	-	-	-	-	GAF,GAF_2,HATPase_c,HisKA,PAS,PAS_3,PAS_4,PAS_9
	NODE_15438_length_690_cov_0.456483_1	386456.JQKN01000017_gene879	9e-110	320.0	COG0035@1|root,arCOG04128@2157|Archaea,2XUU0@28890|Euryarchaeota,23PNM@183925|Methanobacteria	183925|Methanobacteria	F	Uracil phosphoribosyltransferase	upp	-	2.4.2.9	ko:K00761	ko00240,ko01100,map00240,map01100	-	R00966	RC00063	ko00000,ko00001,ko01000	-	-	-	UPRTase
	NODE_15438_length_690_cov_0.456483_2	386456.JQKN01000017_gene879	1.97e-05	45.4	COG0035@1|root,arCOG04128@2157|Archaea,2XUU0@28890|Euryarchaeota,23PNM@183925|Methanobacteria	183925|Methanobacteria	F	Uracil phosphoribosyltransferase	upp	-	2.4.2.9	ko:K00761	ko00240,ko01100,map00240,map01100	-	R00966	RC00063	ko00000,ko00001,ko01000	-	-	-	UPRTase
	NODE_15383_length_693_cov_0.618375_1	679926.Mpet_1408	2.59e-30	117.0	COG0500@1|root,arCOG01773@2157|Archaea	2157|Archaea	Q	Methyltransferase type 11	-	-	-	-	-	-	-	-	-	-	-	-	Methyltransf_11,Methyltransf_23
	NODE_15313_length_696_cov_0.449912_1	386456.JQKN01000021_gene48	5.59e-51	169.0	arCOG02449@1|root,arCOG02449@2157|Archaea,2XZ1K@28890|Euryarchaeota	28890|Euryarchaeota	C	PFAM 4Fe-4S ferredoxin, iron-sulfur binding domain protein	-	-	-	-	-	-	-	-	-	-	-	-	-
	NODE_15313_length_696_cov_0.449912_2	386456.JQKN01000021_gene48	1.89e-42	148.0	arCOG02449@1|root,arCOG02449@2157|Archaea,2XZ1K@28890|Euryarchaeota	28890|Euryarchaeota	C	PFAM 4Fe-4S ferredoxin, iron-sulfur binding domain protein	-	-	-	-	-	-	-	-	-	-	-	-	-
	NODE_15190_length_702_cov_0.848696_1	386456.JQKN01000002_gene2775	2.75e-110	324.0	COG0379@1|root,arCOG04459@2157|Archaea,2XUGT@28890|Euryarchaeota,23NN6@183925|Methanobacteria	183925|Methanobacteria	H	Catalyzes the condensation of iminoaspartate with dihydroxyacetone phosphate to form quinolinate	nadA	-	2.5.1.72	ko:K03517	ko00760,ko01100,map00760,map01100	M00115	R04292	RC01119	ko00000,ko00001,ko00002,ko01000	-	-	-	NadA
	NODE_15028_length_711_cov_0.529110_1	386456.JQKN01000007_gene3250	2.99e-96	293.0	COG1784@1|root,arCOG04469@2157|Archaea,2XSZ3@28890|Euryarchaeota,23NTY@183925|Methanobacteria	183925|Methanobacteria	S	Tripartite tricarboxylate transporter TctA family	-	-	-	ko:K08971	-	-	-	-	ko00000	-	-	-	TctA
	NODE_14977_length_714_cov_0.514480_1	1499967.BAYZ01000190_gene3854	3.34e-07	50.1	COG0778@1|root,COG0778@2|Bacteria,2NQ10@2323|unclassified Bacteria	2|Bacteria	C	Putative TM nitroreductase	-	-	-	-	-	-	-	-	-	-	-	-	Nitroreductase,TM1586_NiRdase
	NODE_14977_length_714_cov_0.514480_2	386456.JQKN01000014_gene3079	1.5400000000000003e-110	328.0	COG1896@1|root,arCOG04311@2157|Archaea,2XVI0@28890|Euryarchaeota	28890|Euryarchaeota	S	HD domain	-	-	-	ko:K07023	-	-	-	-	ko00000	-	-	-	HD_3
	NODE_14889_length_719_cov_0.888514_1	386456.JQKN01000001_gene2324	4.58e-44	150.0	arCOG02703@1|root,arCOG02703@2157|Archaea,2XY9N@28890|Euryarchaeota	28890|Euryarchaeota	Q	Protein-L-isoaspartate(D-aspartate) O-methyltransferase (PCMT)	-	-	-	-	-	-	-	-	-	-	-	-	Methyltransf_11
	NODE_14707_length_730_cov_0.628524_1	386456.JQKN01000002_gene2707	1.3799999999999999e-119	349.0	COG0491@1|root,arCOG00504@2157|Archaea	2157|Archaea	S	COG0491 Zn-dependent hydrolases, including glyoxylases	-	-	-	-	-	-	-	-	-	-	-	-	Lactamase_B
	NODE_14709_length_730_cov_0.562189_1	386456.JQKN01000025_gene583	1.2600000000000001e-129	375.0	COG0122@1|root,arCOG00464@2157|Archaea,2XU5Y@28890|Euryarchaeota,23NZ2@183925|Methanobacteria	183925|Methanobacteria	L	8-oxoguanine DNA glycosylase, N-terminal domain	ogg	-	4.2.99.18	ko:K03660	ko03410,map03410	-	-	-	ko00000,ko00001,ko01000,ko03400	-	-	-	HhH-GPD,OGG_N
	NODE_14682_length_731_cov_0.609272_1	386456.JQKN01000009_gene1217	2.5e-40	147.0	COG2208@1|root,arCOG07678@1|root,arCOG06893@2157|Archaea,arCOG07678@2157|Archaea,2Y2MD@28890|Euryarchaeota,23PHZ@183925|Methanobacteria	183925|Methanobacteria	T	Sigma factor PP2C-like phosphatases	-	-	3.1.3.3	ko:K07315	-	-	-	-	ko00000,ko01000,ko03021	-	-	-	SpoIIE
	NODE_14682_length_731_cov_0.609272_2	386456.JQKN01000009_gene1217	5.389999999999999e-68	224.0	COG2208@1|root,arCOG07678@1|root,arCOG06893@2157|Archaea,arCOG07678@2157|Archaea,2Y2MD@28890|Euryarchaeota,23PHZ@183925|Methanobacteria	183925|Methanobacteria	T	Sigma factor PP2C-like phosphatases	-	-	3.1.3.3	ko:K07315	-	-	-	-	ko00000,ko01000,ko03021	-	-	-	SpoIIE
	NODE_14690_length_731_cov_0.298013_1	877455.Metbo_0503	2.1600000000000003e-43	155.0	COG3610@1|root,arCOG06476@2157|Archaea	2157|Archaea	S	Putative threonine/serine exporter	-	-	-	-	-	-	-	-	-	-	-	-	ThrE,ThrE_2
	NODE_14185_length_764_cov_0.522763_1	386456.JQKN01000001_gene2319	8.380000000000001e-123	360.0	COG1453@1|root,arCOG01625@2157|Archaea,2XU1N@28890|Euryarchaeota,23NXI@183925|Methanobacteria	183925|Methanobacteria	C	Aldo/keto reductase family	-	-	-	ko:K07079	-	-	-	-	ko00000	-	-	-	Aldo_ket_red,Fer4_17
	NODE_14138_length_767_cov_0.653125_1	675635.Psed_2644	3.95e-08	53.9	arCOG08693@1|root,339YK@2|Bacteria,2H5DJ@201174|Actinobacteria	201174|Actinobacteria	-	-	-	-	-	-	-	-	-	-	-	-	-	-	-
	NODE_14138_length_767_cov_0.653125_2	386456.JQKN01000007_gene3246	2.58e-90	273.0	arCOG01220@1|root,arCOG01220@2157|Archaea,2XYGI@28890|Euryarchaeota,23P4Q@183925|Methanobacteria	183925|Methanobacteria	J	Ribosomal protein L11 methyltransferase (PrmA)	-	-	-	-	-	-	-	-	-	-	-	-	PrmA
	NODE_14086_length_770_cov_0.720062_1	1220534.B655_0496	5.72e-29	108.0	COG1814@1|root,arCOG01091@2157|Archaea,2Y6U6@28890|Euryarchaeota,23PJI@183925|Methanobacteria	183925|Methanobacteria	S	VIT family	-	-	-	-	-	-	-	-	-	-	-	-	VIT1
	NODE_14086_length_770_cov_0.720062_2	386456.JQKN01000001_gene1837	2.42e-91	274.0	COG1831@1|root,arCOG00893@2157|Archaea,2XTX7@28890|Euryarchaeota	28890|Euryarchaeota	S	metal-dependent hydrolase (Urease superfamily)	tatD	-	-	ko:K07049	-	-	-	-	ko00000	-	-	-	TatD_DNase
	NODE_14078_length_771_cov_0.262422_1	386456.JQKN01000002_gene2753	1.41e-107	322.0	COG0392@1|root,arCOG00899@2157|Archaea,2XTI1@28890|Euryarchaeota,23NKG@183925|Methanobacteria	183925|Methanobacteria	S	Lysylphosphatidylglycerol synthase TM region	-	-	-	ko:K07027	-	-	-	-	ko00000,ko02000	4.D.2	-	-	LPG_synthase_TM
	NODE_14043_length_773_cov_0.331269_1	1220534.B655_0933	4.66e-65	205.0	COG1971@1|root,arCOG04898@2157|Archaea,2XZBX@28890|Euryarchaeota	28890|Euryarchaeota	U	Probably functions as a manganese efflux pump	mntP	-	-	-	-	-	-	-	-	-	-	-	Mntp
	NODE_13942_length_779_cov_0.725460_1	386456.JQKN01000002_gene2511	1.69e-149	429.0	COG1903@1|root,arCOG04383@2157|Archaea,2XV53@28890|Euryarchaeota,23NQ2@183925|Methanobacteria	183925|Methanobacteria	H	Catalyzes the methylation of C-1 in cobalt-precorrin-5B to form cobalt-precorrin-6A	cbiD	-	2.1.1.195	ko:K02188	ko00860,ko01100,map00860,map01100	-	R07773	RC00003,RC02051	ko00000,ko00001,ko01000	-	-	-	CbiD
	NODE_13705_length_795_cov_1.101796_1	868131.MSWAN_0460	1.62e-140	402.0	COG1097@1|root,arCOG00678@2157|Archaea,2XWEN@28890|Euryarchaeota,23P36@183925|Methanobacteria	183925|Methanobacteria	J	Non-catalytic component of the exosome, which is a complex involved in RNA degradation. Increases the RNA binding and the efficiency of RNA degradation. Confers strong poly(A) specificity to the exosome	rrp4	-	-	ko:K03679	ko03018,map03018	M00390,M00391	-	-	ko00000,ko00001,ko00002,ko03019	-	-	-	ECR1_N,KH_6
	NODE_13641_length_799_cov_0.514881_1	386456.JQKN01000002_gene2877	6.27e-117	356.0	COG1241@1|root,arCOG00439@2157|Archaea,2XT5D@28890|Euryarchaeota,23NN9@183925|Methanobacteria	183925|Methanobacteria	L	Belongs to the MCM family	mcm	-	-	ko:K10726	ko03030,map03030	-	-	-	ko00000,ko00001,ko01000,ko03032	-	-	-	MCM,MCM_N,MCM_OB
	NODE_13388_length_817_cov_0.505797_1	386456.JQKN01000001_gene1892	3.48e-87	273.0	COG0479@1|root,arCOG00963@2157|Archaea,2Y85K@28890|Euryarchaeota,23PZE@183925|Methanobacteria	183925|Methanobacteria	C	2Fe-2S iron-sulfur cluster binding domain	-	-	1.3.4.1	ko:K18210	ko00720,ko01120,ko01200,map00720,map01120,map01200	M00620	R10660	RC00045	ko00000,ko00001,ko00002,ko01000	-	-	-	CCG,Fer2_3,Fer4_8
	NODE_13346_length_821_cov_0.406340_1	1220534.B655_1667	2.8e-77	248.0	COG0661@1|root,arCOG01189@2157|Archaea,2XT2I@28890|Euryarchaeota,23PD0@183925|Methanobacteria	183925|Methanobacteria	S	ABC1 family	-	-	-	ko:K03688	-	-	-	-	ko00000	-	-	-	ABC1
	NODE_13346_length_821_cov_0.406340_2	386456.JQKN01000002_gene2595	1.6e-12	65.9	COG2324@1|root,arCOG02835@2157|Archaea,2XTQ8@28890|Euryarchaeota	28890|Euryarchaeota	S	Carotene biosynthesis associated membrane protein	cruF	-	4.2.1.161	ko:K08977	-	-	-	-	ko00000,ko01000	-	-	-	Caroten_synth
	NODE_13251_length_828_cov_0.714693_1	386456.JQKN01000008_gene1543	3.65e-139	405.0	COG0722@1|root,arCOG00245@2157|Archaea,2XU8C@28890|Euryarchaeota,23PCA@183925|Methanobacteria	183925|Methanobacteria	E	prephenate dehydrogenase	-	-	1.3.1.12	ko:K04517	ko00400,ko00401,ko01100,ko01110,ko01130,ko01230,map00400,map00401,map01100,map01110,map01130,map01230	M00025	R01728	RC00125	ko00000,ko00001,ko00002,ko01000	-	-	-	PDH
	NODE_12656_length_873_cov_0.343164_1	386456.JQKN01000001_gene2030	1.47e-132	379.0	COG2220@1|root,arCOG00497@2157|Archaea,2XTCN@28890|Euryarchaeota,23NUI@183925|Methanobacteria	183925|Methanobacteria	S	Belongs to the UPF0173 family	-	-	-	-	-	-	-	-	-	-	-	-	Lactamase_B_3
	NODE_12656_length_873_cov_0.343164_2	386456.JQKN01000001_gene2029	9.27e-17	79.0	COG1378@1|root,arCOG02038@2157|Archaea,2Y7G1@28890|Euryarchaeota,23PYW@183925|Methanobacteria	183925|Methanobacteria	K	transcriptional	-	-	-	-	-	-	-	-	-	-	-	-	-
	NODE_12407_length_896_cov_0.330299_1	386456.JQKN01000007_gene3209	1.1e-61	196.0	COG0704@1|root,arCOG00232@2157|Archaea,2XUZ9@28890|Euryarchaeota,23PQ2@183925|Methanobacteria	183925|Methanobacteria	P	Plays a role in the regulation of phosphate uptake	-	-	-	ko:K02039	-	-	-	-	ko00000	-	-	-	PhoU
	NODE_12407_length_896_cov_0.330299_2	386456.JQKN01000007_gene3212	1.41e-78	239.0	COG1117@1|root,arCOG00231@2157|Archaea,2XTJK@28890|Euryarchaeota,23NU9@183925|Methanobacteria	183925|Methanobacteria	P	Part of the ABC transporter complex PstSACB involved in phosphate import. Responsible for energy coupling to the transport system	pstB	-	3.6.3.27	ko:K02036	ko02010,map02010	M00222	-	-	ko00000,ko00001,ko00002,ko01000,ko02000	3.A.1.7	-	-	ABC_tran
	NODE_12379_length_898_cov_0.350195_1	1047013.AQSP01000108_gene2063	0.000178	47.4	COG1983@1|root,COG1983@2|Bacteria	2|Bacteria	KT	positive regulation of macromolecule biosynthetic process	-	-	-	ko:K03973	-	-	-	-	ko00000,ko02048,ko03000	-	-	-	PspC
	NODE_12162_length_918_cov_0.338812_1	868131.MSWAN_1195	2.46e-90	268.0	COG0571@1|root,arCOG03457@2157|Archaea,2XXYW@28890|Euryarchaeota,23PJW@183925|Methanobacteria	183925|Methanobacteria	K	Ribonuclease III family	rnc	-	3.1.26.3	ko:K03685	ko03008,ko05205,map03008,map05205	-	-	-	ko00000,ko00001,ko01000,ko03009,ko03019,ko03036	-	-	-	Ribonucleas_3_3,dsrm
	NODE_12086_length_923_cov_0.458543_1	386456.JQKN01000008_gene1411	2.63e-11	64.3	COG0143@1|root,arCOG00810@2157|Archaea,2XTG5@28890|Euryarchaeota,23NVU@183925|Methanobacteria	183925|Methanobacteria	J	Is required not only for elongation of protein synthesis but also for the initiation of all mRNA translation through initiator tRNA(fMet) aminoacylation	metG	-	6.1.1.10	ko:K01874	ko00450,ko00970,map00450,map00970	M00359,M00360	R03659,R04773	RC00055,RC00523	ko00000,ko00001,ko00002,ko01000,ko01007,ko03016	-	-	-	Anticodon_1,tRNA-synt_1g,tRNA_bind
	NODE_12086_length_923_cov_0.458543_2	386456.JQKN01000008_gene1410	1.71e-130	385.0	COG1771@1|root,arCOG03198@2157|Archaea,2XUYJ@28890|Euryarchaeota,23NME@183925|Methanobacteria	183925|Methanobacteria	S	Protein of unknown function (DUF530)	-	-	-	ko:K09724	-	-	-	-	ko00000	-	-	-	DUF530
	NODE_11993_length_932_cov_0.525466_1	386456.JQKN01000004_gene135	8.13e-80	263.0	arCOG10249@1|root,arCOG10249@2157|Archaea	2157|Archaea	-	-	-	-	-	-	-	-	-	-	-	-	-	-	-
	NODE_11857_length_944_cov_0.596083_1	386456.JQKN01000001_gene2086	1.05e-118	364.0	COG1239@1|root,COG1240@1|root,arCOG00438@2157|Archaea,arCOG06472@2157|Archaea,2XUP4@28890|Euryarchaeota	28890|Euryarchaeota	H	magnesium chelatase	chlID	-	6.6.1.1	ko:K03404,ko:K03405	ko00860,ko01100,ko01110,map00860,map01100,map01110	-	R03877	RC01012	ko00000,ko00001,ko01000	-	-	-	Mg_chelatase,VWA_2
	NODE_11721_length_956_cov_0.417370_2	386456.JQKN01000008_gene1371	2.54e-65	213.0	COG0784@1|root,COG3920@1|root,arCOG02335@2157|Archaea,arCOG02386@2157|Archaea	2157|Archaea	T	response regulator, receiver	-	-	-	-	-	-	-	-	-	-	-	-	BAT,GAF_2,HATPase_c,HTH_10,HisKA,HisKA_2,PAS_4,PAS_9,Response_reg
	NODE_11478_length_978_cov_0.658049_1	386456.JQKN01000004_gene143	1.75e-08	55.5	COG1701@1|root,arCOG04262@2157|Archaea,2XTAP@28890|Euryarchaeota,23NZF@183925|Methanobacteria	183925|Methanobacteria	S	Pfam:DUF137	panC	-	6.3.2.36	ko:K09722	ko00410,ko00770,ko01100,map00410,map00770,map01100	-	R09379	RC00096,RC00141	ko00000,ko00001,ko01000	-	-	-	PPS_PS
	NODE_11478_length_978_cov_0.658049_2	386456.JQKN01000004_gene142	1.3e-86	260.0	COG0237@1|root,arCOG01045@2157|Archaea,2XWNJ@28890|Euryarchaeota,23P67@183925|Methanobacteria	183925|Methanobacteria	H	AAA domain	coaE	-	-	-	-	-	-	-	-	-	-	-	AAA_17
	NODE_11478_length_978_cov_0.658049_3	386456.JQKN01000004_gene141	0.000297	41.2	COG1931@1|root,arCOG01043@2157|Archaea	2157|Archaea	H	Belongs to the UPF0201 family	-	-	-	ko:K09736	-	-	-	-	ko00000	-	-	-	RNA_binding
	NODE_11442_length_982_cov_0.673684_1	386456.JQKN01000023_gene70	2.19e-109	322.0	COG2513@1|root,arCOG00581@2157|Archaea,2Y86J@28890|Euryarchaeota	28890|Euryarchaeota	G	COG2513 PEP phosphonomutase and related enzymes	-	-	4.1.3.30,5.4.2.9	ko:K01841,ko:K03417	ko00440,ko00640,ko01100,ko01120,ko01130,map00440,map00640,map01100,map01120,map01130	-	R00409,R00661	RC00286,RC00287,RC02792	ko00000,ko00001,ko01000	-	-	-	PEP_mutase
	NODE_11395_length_987_cov_0.506977_1	386456.JQKN01000001_gene2038	1.05e-35	129.0	arCOG06505@1|root,arCOG06505@2157|Archaea,2Y0DW@28890|Euryarchaeota	28890|Euryarchaeota	-	-	-	-	-	-	-	-	-	-	-	-	-	-	-
	NODE_11395_length_987_cov_0.506977_2	386456.JQKN01000001_gene2037	9.03e-97	285.0	COG1838@1|root,arCOG04406@2157|Archaea,2XXBQ@28890|Euryarchaeota,23NZT@183925|Methanobacteria	183925|Methanobacteria	C	Fumarase C-terminus	fumA3	-	4.2.1.2	ko:K01678	ko00020,ko00620,ko00720,ko01100,ko01110,ko01120,ko01130,ko01200,map00020,map00620,map00720,map01100,map01110,map01120,map01130,map01200	M00009,M00011,M00173,M00374,M00620	R01082	RC00443	ko00000,ko00001,ko00002,ko01000	-	-	-	Fumerase_C
	NODE_11354_length_991_cov_0.528935_2	386456.JQKN01000007_gene3185	1.43e-132	383.0	COG1578@1|root,arCOG04410@2157|Archaea,2XWGU@28890|Euryarchaeota,23NZ1@183925|Methanobacteria	183925|Methanobacteria	S	Protein of unknown function DUF89	-	-	-	ko:K09116	-	-	-	-	ko00000	-	-	-	DUF89
	NODE_11323_length_994_cov_1.138408_1	386456.JQKN01000015_gene2924	3.93e-135	390.0	COG4020@1|root,arCOG04885@2157|Archaea,2XV89@28890|Euryarchaeota,23NJ2@183925|Methanobacteria	183925|Methanobacteria	S	Belongs to the UPF0285 family	-	-	-	-	-	-	-	-	-	-	-	-	-
	NODE_11316_length_995_cov_0.976959_1	386456.JQKN01000001_gene2179	2.2200000000000002e-181	513.0	COG1223@1|root,arCOG04163@2157|Archaea,2XUPW@28890|Euryarchaeota,23NRE@183925|Methanobacteria	183925|Methanobacteria	O	AAA ATPase	-	-	-	ko:K07392	-	-	-	-	ko00000	-	-	-	AAA
	NODE_11251_length_1002_cov_0.587429_1	386456.JQKN01000001_gene2036	4.17e-178	513.0	COG3356@1|root,arCOG04351@2157|Archaea,2XVEY@28890|Euryarchaeota,23NN7@183925|Methanobacteria	183925|Methanobacteria	S	Predicted membrane protein (DUF2070)	-	-	-	ko:K08979	-	-	-	-	ko00000	-	-	-	DUF2070
	NODE_11158_length_1012_cov_0.541243_1	386456.JQKN01000008_gene1494	6.300000000000001e-36	137.0	arCOG02555@1|root,arCOG02555@2157|Archaea	2157|Archaea	-	-	-	-	-	-	-	-	-	-	-	-	-	-	Big_5,Chlam_PMP
	NODE_11141_length_1014_cov_0.760992_1	386456.JQKN01000012_gene1052	2.03e-154	452.0	COG0417@1|root,arCOG00328@2157|Archaea,2XU1K@28890|Euryarchaeota,23NV0@183925|Methanobacteria	183925|Methanobacteria	L	DNA polymerase, family B, exonuclease domain	polB1	-	2.7.7.7	ko:K02319	ko00230,ko00240,ko01100,ko03030,map00230,map00240,map01100,map03030	-	R00375,R00376,R00377,R00378	RC02795	ko00000,ko00001,ko01000,ko03032	-	-	-	DNA_pol_B,DNA_pol_B_exo1
	NODE_11102_length_1018_cov_0.453423_1	386456.JQKN01000008_gene1367	4.74e-113	332.0	COG1108@1|root,arCOG01006@2157|Archaea,2XTNB@28890|Euryarchaeota	28890|Euryarchaeota	P	COG1108 ABC-type Mn2 Zn2 transport systems permease components	znuB1	-	-	ko:K02075,ko:K09816	ko02010,map02010	M00242,M00244	-	-	ko00000,ko00001,ko00002,ko02000	3.A.1.15,3.A.1.15.3,3.A.1.15.5	-	iAF692.Mbar_A0996	ABC-3
	NODE_10922_length_1037_cov_0.793407_1	386456.JQKN01000013_gene3070	5.81e-45	149.0	COG1838@1|root,arCOG04406@2157|Archaea,2Y3WH@28890|Euryarchaeota,23PKG@183925|Methanobacteria	183925|Methanobacteria	C	Fumarase C-terminus	-	-	4.2.1.2	ko:K01678	ko00020,ko00620,ko00720,ko01100,ko01110,ko01120,ko01130,ko01200,map00020,map00620,map00720,map01100,map01110,map01120,map01130,map01200	M00009,M00011,M00173,M00374,M00620	R01082	RC00443	ko00000,ko00001,ko00002,ko01000	-	-	-	Fumerase_C
	NODE_10922_length_1037_cov_0.793407_2	386456.JQKN01000013_gene3069	9.32e-120	354.0	COG0076@1|root,arCOG00027@2157|Archaea,2XT09@28890|Euryarchaeota,23PE2@183925|Methanobacteria	183925|Methanobacteria	E	Catalyzes the decarboxylation of L-tyrosine to produce tyramine for methanofuran biosynthesis. Can also catalyze the decarboxylation of L-aspartate to produce beta-alanine for coenzyme A (CoA) biosynthesis	mfnA	-	4.1.1.11,4.1.1.25	ko:K18933	ko00350,ko00410,ko00680,ko00770,ko01100,ko01110,map00350,map00410,map00680,map00770,map01100,map01110	-	R00489,R00736	RC00299	ko00000,ko00001,ko01000	-	-	-	Pyridoxal_deC
	NODE_10847_length_1048_cov_1.220413_1	386456.JQKN01000008_gene1442	9.24e-122	350.0	COG0605@1|root,arCOG04147@2157|Archaea,2XUDD@28890|Euryarchaeota	28890|Euryarchaeota	P	Destroys radicals which are normally produced within the cells and which are toxic to biological systems	sod	-	1.15.1.1	ko:K04564	ko04013,ko04068,ko04146,ko04211,ko04212,ko04213,ko05016,map04013,map04068,map04146,map04211,map04212,map04213,map05016	-	-	-	ko00000,ko00001,ko01000	-	-	-	Sod_Fe_C,Sod_Fe_N
	NODE_10847_length_1048_cov_1.220413_2	386456.JQKN01000008_gene1441	2.25e-46	160.0	COG1541@1|root,arCOG02620@2157|Archaea,2XU3A@28890|Euryarchaeota	28890|Euryarchaeota	H	coenzyme F390 synthetase	paaK	-	6.2.1.30	ko:K01912	ko00360,ko01120,ko05111,map00360,map01120,map05111	-	R02539	RC00004,RC00014	ko00000,ko00001,ko01000	-	-	-	AMP-binding,AMP-binding_C_2
	NODE_10759_length_1058_cov_0.886144_1	386456.JQKN01000008_gene1391	7.6e-65	227.0	COG0419@1|root,arCOG00368@2157|Archaea,2XTC7@28890|Euryarchaeota	28890|Euryarchaeota	L	Part of the Rad50 Mre11 complex, which is involved in the early steps of DNA double-strand break (DSB) repair. The complex may facilitate opening of the processed DNA ends to aid in the recruitment of HerA and NurA. Rad50 controls the balance between DNA end bridging and DNA resection via ATP-dependent structural rearrangements of the Rad50 Mre11 complex	rad50	GO:0003674,GO:0005488,GO:0005515,GO:0042802	-	ko:K03546	-	-	-	-	ko00000,ko03400	-	-	-	AAA_15,AAA_21,AAA_23,Rad50_zn_hook,SMC_N
	NODE_10761_length_1058_cov_0.537057_1	386456.JQKN01000005_gene496	1.01e-16	78.6	arCOG06454@1|root,arCOG06454@2157|Archaea,2XWG7@28890|Euryarchaeota,23NTT@183925|Methanobacteria	183925|Methanobacteria	S	Zc3h12a-like Ribonuclease NYN domain	-	-	-	-	-	-	-	-	-	-	-	-	RNase_Zc3h12a
	NODE_10761_length_1058_cov_0.537057_2	386456.JQKN01000005_gene497	1.21e-147	419.0	COG1409@1|root,arCOG01153@2157|Archaea,2XWZF@28890|Euryarchaeota,23NZ7@183925|Methanobacteria	183925|Methanobacteria	S	Calcineurin-like phosphoesterase superfamily domain	-	-	-	-	-	-	-	-	-	-	-	-	Metallophos,Metallophos_2
	NODE_10761_length_1058_cov_0.537057_3	877455.Metbo_0965	1.23e-17	76.6	COG1308@1|root,arCOG04061@2157|Archaea,2XXYV@28890|Euryarchaeota,23P5R@183925|Methanobacteria	183925|Methanobacteria	K	Contacts the emerging nascent chain on the ribosome	nac	-	-	ko:K03626	-	-	-	-	ko00000	-	-	-	NAC
	NODE_10754_length_1059_cov_0.482833_1	386456.JQKN01000007_gene3184	2.5199999999999997e-104	309.0	COG2084@1|root,arCOG00247@2157|Archaea,2Y21D@28890|Euryarchaeota,23PPX@183925|Methanobacteria	183925|Methanobacteria	I	6-phosphogluconate dehydrogenase, NAD-binding	-	-	-	-	-	-	-	-	-	-	-	-	DUF1932,F420_oxidored
	NODE_10754_length_1059_cov_0.482833_2	1220534.B655_0786	5.1e-28	107.0	COG0785@1|root,arCOG02398@2157|Archaea,2Y10F@28890|Euryarchaeota,23PT1@183925|Methanobacteria	183925|Methanobacteria	O	PFAM Cytochrome C biogenesis protein transmembrane region	-	-	-	ko:K06196	-	-	-	-	ko00000,ko02000	5.A.1.2	-	-	DsbD
	NODE_10578_length_1078_cov_0.902208_1	386456.JQKN01000001_gene1841	2.61e-169	477.0	COG0074@1|root,arCOG01339@2157|Archaea,2XTI3@28890|Euryarchaeota,23NJ9@183925|Methanobacteria	183925|Methanobacteria	C	Succinyl-CoA synthetase functions in the citric acid cycle (TCA), coupling the hydrolysis of succinyl-CoA to the synthesis of either ATP or GTP and thus represents the only step of substrate-level phosphorylation in the TCA. The alpha subunit of the enzyme binds the substrates coenzyme A and phosphate, while succinate binding and nucleotide specificity is provided by the beta subunit	sucD	-	6.2.1.5	ko:K01902	ko00020,ko00640,ko00660,ko00720,ko01100,ko01110,ko01120,ko01130,ko01200,map00020,map00640,map00660,map00720,map01100,map01110,map01120,map01130,map01200	M00009,M00011,M00173,M00374,M00620	R00405,R02404	RC00004,RC00014	ko00000,ko00001,ko00002,ko01000	-	-	-	CoA_binding,Ligase_CoA
	NODE_10471_length_1091_cov_0.724066_1	386456.JQKN01000008_gene1402	4.6e-124	359.0	COG0451@1|root,arCOG01369@2157|Archaea,2XTRS@28890|Euryarchaeota,23NPZ@183925|Methanobacteria	183925|Methanobacteria	M	UDP-glucose 4-epimerase	galE	-	5.1.3.2	ko:K01784	ko00052,ko00520,ko01100,map00052,map00520,map01100	M00361,M00362,M00632	R00291,R02984	RC00289	ko00000,ko00001,ko00002,ko01000	-	-	-	Epimerase
	NODE_9996_length_1152_cov_0.603902_1	1046625.AFQY01000003_gene2479	1.82e-129	372.0	COG4757@1|root,COG4757@2|Bacteria,1Q1V6@1224|Proteobacteria,1RT3H@1236|Gammaproteobacteria,3NJ71@468|Moraxellaceae	1236|Gammaproteobacteria	S	Serine aminopeptidase, S33	-	-	-	-	-	-	-	-	-	-	-	-	Abhydrolase_6,Hydrolase_4
	NODE_9996_length_1152_cov_0.603902_2	1046625.AFQY01000003_gene2478	2.72e-116	334.0	COG1309@1|root,COG1309@2|Bacteria,1RDIP@1224|Proteobacteria,1SDKT@1236|Gammaproteobacteria,3NNAV@468|Moraxellaceae	1236|Gammaproteobacteria	K	Bacterial regulatory proteins, tetR family	-	-	-	-	-	-	-	-	-	-	-	-	TetR_C_13,TetR_N
	NODE_9946_length_1158_cov_0.618817_1	386456.JQKN01000010_gene711	1.28e-196	552.0	COG0520@1|root,arCOG00065@2157|Archaea,2XSYI@28890|Euryarchaeota	28890|Euryarchaeota	E	Cysteine desulfurase	nifS	-	2.8.1.7,4.4.1.16	ko:K11717	ko00450,ko01100,map00450,map01100	-	R03599,R11528	RC00961,RC01789,RC02313	ko00000,ko00001,ko01000	-	-	-	Aminotran_5
	NODE_9895_length_1166_cov_0.629451_3	386456.JQKN01000010_gene714	7.74e-137	392.0	COG1571@1|root,arCOG01116@2157|Archaea,2XTUY@28890|Euryarchaeota,23NTV@183925|Methanobacteria	183925|Methanobacteria	S	marker protein 11	-	-	-	-	-	-	-	-	-	-	-	-	DUF1743
	NODE_9886_length_1167_cov_0.669231_1	880526.KE386488_gene1027	1.2199999999999999e-82	263.0	COG0297@1|root,COG0297@2|Bacteria,4PKP8@976|Bacteroidetes,2G0CZ@200643|Bacteroidia,22UN6@171550|Rikenellaceae	976|Bacteroidetes	G	Glycosyl transferase 4-like domain	-	-	-	-	-	-	-	-	-	-	-	-	Glyco_transf_4,Glyco_transf_5,Glycos_transf_1
	NODE_9827_length_1177_cov_0.552381_1	386456.JQKN01000001_gene1892	7.460000000000001e-26	105.0	COG0479@1|root,arCOG00963@2157|Archaea,2Y85K@28890|Euryarchaeota,23PZE@183925|Methanobacteria	183925|Methanobacteria	C	2Fe-2S iron-sulfur cluster binding domain	-	-	1.3.4.1	ko:K18210	ko00720,ko01120,ko01200,map00720,map01120,map01200	M00620	R10660	RC00045	ko00000,ko00001,ko00002,ko01000	-	-	-	CCG,Fer2_3,Fer4_8
	NODE_9827_length_1177_cov_0.552381_2	386456.JQKN01000001_gene1891	4.21e-132	378.0	COG0565@1|root,arCOG01018@2157|Archaea,2XUIY@28890|Euryarchaeota,23NM0@183925|Methanobacteria	183925|Methanobacteria	J	TIGRFAM RNA methyltransferase, TrmH	-	-	-	-	-	-	-	-	-	-	-	-	SpoU_methylase
	NODE_9783_length_1183_cov_0.474432_2	386456.JQKN01000004_gene129	1.84e-49	169.0	COG3635@1|root,arCOG01696@2157|Archaea,2XU1U@28890|Euryarchaeota,23NN3@183925|Methanobacteria	183925|Methanobacteria	G	phosphoglycerate mutase	-	-	5.4.2.12	ko:K15635	ko00010,ko00260,ko00680,ko01100,ko01110,ko01120,ko01130,ko01200,ko01230,map00010,map00260,map00680,map01100,map01110,map01120,map01130,map01200,map01230	M00001,M00002,M00003	R01518	RC00536	ko00000,ko00001,ko00002,ko01000	-	-	-	Metalloenzyme,PhosphMutase
	NODE_9783_length_1183_cov_0.474432_3	386456.JQKN01000004_gene128	3.1200000000000004e-125	364.0	COG0460@1|root,arCOG01351@2157|Archaea,2XSWF@28890|Euryarchaeota,23NKT@183925|Methanobacteria	183925|Methanobacteria	E	homoserine dehydrogenase	hom	-	1.1.1.3	ko:K00003	ko00260,ko00270,ko00300,ko01100,ko01110,ko01120,ko01130,ko01230,map00260,map00270,map00300,map01100,map01110,map01120,map01130,map01230	M00017,M00018	R01773,R01775	RC00087	ko00000,ko00001,ko00002,ko01000	-	-	-	Homoserine_dh,NAD_binding_3
	NODE_9769_length_1185_cov_0.343100_1	386456.JQKN01000008_gene1437	2.4500000000000003e-43	148.0	COG1920@1|root,arCOG04472@2157|Archaea,2XX3C@28890|Euryarchaeota,23P40@183925|Methanobacteria	183925|Methanobacteria	H	Guanylyltransferase that catalyzes the activation of 2- phospho-L-lactate (LP) as (2S)-lactyl-2-diphospho-5'-guanosine (LPPG), via the condensation of LP with GTP. Is involved in the biosynthesis of coenzyme F420, a hydride carrier cofactor	cofC	-	2.7.7.68	ko:K14941	ko00680,ko01120,map00680,map01120	M00378	R09397	RC00002	ko00000,ko00001,ko00002,ko01000	-	-	-	CofC
	NODE_9769_length_1185_cov_0.343100_2	386456.JQKN01000008_gene1436	3.78e-81	249.0	arCOG10173@1|root,arCOG10173@2157|Archaea	2157|Archaea	-	-	-	-	-	-	-	-	-	-	-	-	-	-	-
	NODE_9763_length_1186_cov_0.525968_1	386456.JQKN01000007_gene3178	2.5e-163	467.0	COG1323@1|root,arCOG03224@2157|Archaea,2Y3AB@28890|Euryarchaeota,23PEZ@183925|Methanobacteria	183925|Methanobacteria	S	Cytidyltransferase-related C-terminal region	-	-	-	-	-	-	-	-	-	-	-	-	HIGH_NTase1,HIGH_NTase1_ass
	NODE_9763_length_1186_cov_0.525968_3	386456.JQKN01000007_gene3178	1.69e-07	52.0	COG1323@1|root,arCOG03224@2157|Archaea,2Y3AB@28890|Euryarchaeota,23PEZ@183925|Methanobacteria	183925|Methanobacteria	S	Cytidyltransferase-related C-terminal region	-	-	-	-	-	-	-	-	-	-	-	-	HIGH_NTase1,HIGH_NTase1_ass
	NODE_9746_length_1187_cov_0.631132_1	877455.Metbo_0096	1.58e-09	57.4	COG0496@1|root,arCOG02303@2157|Archaea,2XT5R@28890|Euryarchaeota,23NXQ@183925|Methanobacteria	183925|Methanobacteria	S	Nucleotidase that shows phosphatase activity on nucleoside 5'-monophosphates	surE	-	3.1.3.5	ko:K03787	ko00230,ko00240,ko00760,ko01100,ko01110,map00230,map00240,map00760,map01100,map01110	-	R00183,R00511,R00963,R01126,R01227,R01569,R01664,R01968,R02088,R02102,R02323,R02719,R03346	RC00017	ko00000,ko00001,ko01000	-	-	-	SurE
	NODE_9746_length_1187_cov_0.631132_2	386456.JQKN01000015_gene2919	1.5299999999999998e-94	285.0	arCOG06496@1|root,arCOG06496@2157|Archaea,2XYCK@28890|Euryarchaeota,23P2Y@183925|Methanobacteria	183925|Methanobacteria	V	Restriction endonuclease	-	-	-	-	-	-	-	-	-	-	-	-	Mrr_cat
	NODE_9709_length_1192_cov_0.408451_1	386456.JQKN01000011_gene756	2.2e-94	286.0	COG0784@1|root,arCOG02348@1|root,arCOG02348@2157|Archaea,arCOG02386@2157|Archaea	2157|Archaea	T	response regulator, receiver	-	-	-	-	-	-	-	-	-	-	-	-	BAT,GAF_2,HATPase_c,HTH_10,HisKA,HisKA_2,PAS_3,PAS_4,PAS_9,Response_reg
	NODE_9709_length_1192_cov_0.408451_2	386456.JQKN01000011_gene757	4.16e-80	245.0	COG4742@1|root,arCOG04362@2157|Archaea,2Y7NG@28890|Euryarchaeota,23PX0@183925|Methanobacteria	183925|Methanobacteria	K	Domain of unknown function (DUF1724)	-	-	-	-	-	-	-	-	-	-	-	-	DUF1724
	NODE_9671_length_1198_cov_0.871148_1	386456.JQKN01000001_gene1672	1.41e-70	215.0	COG1325@1|root,arCOG01042@2157|Archaea,2Y01Q@28890|Euryarchaeota,23P6T@183925|Methanobacteria	183925|Methanobacteria	J	RNA binding	-	-	-	ko:K07581	-	-	-	-	ko00000	-	-	-	RNA_binding
	NODE_9671_length_1198_cov_0.871148_2	386456.JQKN01000001_gene1673	1.16e-107	316.0	COG1603@1|root,arCOG00307@2157|Archaea,2XU7Q@28890|Euryarchaeota,23P4P@183925|Methanobacteria	183925|Methanobacteria	J	Part of ribonuclease P, a protein complex that generates mature tRNA molecules by cleaving their 5'-ends	rnp3	-	3.1.26.5	ko:K03539	ko03008,ko03013,map03008,map03013	-	-	-	ko00000,ko00001,ko01000,ko03009,ko03016,ko03029	-	-	-	RNase_P_p30
	NODE_9660_length_1199_cov_0.774254_1	386456.JQKN01000001_gene1930	1.51e-93	276.0	COG0521@1|root,arCOG00214@2157|Archaea,2XWJF@28890|Euryarchaeota,23PN5@183925|Methanobacteria	183925|Methanobacteria	H	TIGRFAM molybdenum cofactor synthesis	moaB	-	2.7.7.75	ko:K03638	ko00790,ko01100,map00790,map01100	-	R09726	RC00002	ko00000,ko00001,ko01000	-	-	-	MoCF_biosynth
	NODE_9565_length_1210_cov_0.795937_1	386456.JQKN01000001_gene1791	2.18e-236	664.0	COG1245@1|root,arCOG00187@2157|Archaea,2XSZE@28890|Euryarchaeota,23NKN@183925|Methanobacteria	183925|Methanobacteria	E	RNase L inhibitor	-	-	-	ko:K06174	-	-	-	-	ko00000,ko03009	-	-	-	ABC_tran,Fer4,RLI
	NODE_9422_length_1231_cov_0.614130_1	1330700.JQNC01000003_gene184	9.69e-26	102.0	COG5502@1|root,COG5502@2|Bacteria,1WJW9@1297|Deinococcus-Thermus	1297|Deinococcus-Thermus	S	Uncharacterized conserved protein (DUF2267)	-	-	-	-	-	-	-	-	-	-	-	-	DUF2267
	NODE_9422_length_1231_cov_0.614130_3	1120977.JHUX01000004_gene2184	3.94e-14	67.8	COG2155@1|root,COG2155@2|Bacteria,1N77I@1224|Proteobacteria,1SHMF@1236|Gammaproteobacteria,3NPGK@468|Moraxellaceae	1236|Gammaproteobacteria	S	Domain of unknown function (DUF378)	-	-	-	ko:K09779	-	-	-	-	ko00000	-	-	-	DUF378
	NODE_9401_length_1234_cov_0.843722_1	386456.JQKN01000008_gene1618	4.75e-33	115.0	COG1742@1|root,arCOG07820@2157|Archaea	2157|Archaea	S	PFAM Uncharacterised BCR, YnfA UPF0060 family	-	-	-	ko:K09771	-	-	-	-	ko00000,ko02000	2.A.7.26	-	-	UPF0060
	NODE_9401_length_1234_cov_0.843722_2	386456.JQKN01000002_gene2805	1.5999999999999998e-141	407.0	COG1474@1|root,arCOG00467@2157|Archaea,2XTRB@28890|Euryarchaeota,23NW6@183925|Methanobacteria	183925|Methanobacteria	L	Involved in regulation of DNA replication	-	-	-	ko:K10725	-	-	-	-	ko00000,ko03032	-	-	-	-
	NODE_9394_length_1237_cov_0.304505_1	386456.JQKN01000001_gene1804	5.15e-31	108.0	COG1998@1|root,arCOG04183@2157|Archaea,2XZZ0@28890|Euryarchaeota,23PUT@183925|Methanobacteria	183925|Methanobacteria	J	Belongs to the eukaryotic ribosomal protein eS31 family	rps27ae	-	-	ko:K02977	ko03010,map03010	M00177,M00179	-	-	br01610,ko00000,ko00001,ko00002,ko03011,ko04147	-	-	-	Ribosomal_S27
	NODE_9394_length_1237_cov_0.304505_2	386456.JQKN01000001_gene1803	1.78e-184	525.0	COG0165@1|root,arCOG01748@2157|Archaea,2XUWS@28890|Euryarchaeota,23NTZ@183925|Methanobacteria	183925|Methanobacteria	E	argininosuccinate lyase	argH	-	4.3.2.1	ko:K01755	ko00220,ko00250,ko01100,ko01110,ko01130,ko01230,map00220,map00250,map01100,map01110,map01130,map01230	M00029,M00844,M00845	R01086	RC00445,RC00447	ko00000,ko00001,ko00002,ko01000,ko04147	-	-	-	ASL_C2,Lyase_1
	NODE_9358_length_1246_cov_0.412869_1	504472.Slin_0544	6.84e-12	70.9	COG0457@1|root,COG1680@1|root,COG0457@2|Bacteria,COG1680@2|Bacteria,4NI1Z@976|Bacteroidetes,47Q5S@768503|Cytophagia	976|Bacteroidetes	V	Beta-lactamase	-	-	-	-	-	-	-	-	-	-	-	-	Beta-lactamase,DUF3471,TPR_2,TPR_8
	NODE_9123_length_1287_cov_0.893966_1	386456.JQKN01000002_gene2651	2.55e-91	279.0	COG0530@1|root,arCOG02881@2157|Archaea,2XVHN@28890|Euryarchaeota,23PNH@183925|Methanobacteria	183925|Methanobacteria	P	K -dependent Na Ca	-	-	-	ko:K07301	-	-	-	-	ko00000,ko02000	2.A.19.5	-	-	Na_Ca_ex
	NODE_9123_length_1287_cov_0.893966_2	1220534.B655_2201	7.73e-48	157.0	COG1055@1|root,arCOG00238@2157|Archaea	2157|Archaea	P	Citrate transporter	-	-	-	ko:K14445	-	-	-	-	ko00000,ko02000	2.A.47.1	-	-	CitMHS,Na_sulph_symp
	NODE_9038_length_1302_cov_0.676596_1	386456.JQKN01000001_gene2083	4.79e-34	123.0	COG1852@1|root,arCOG02078@2157|Archaea,2XWB4@28890|Euryarchaeota,23P3P@183925|Methanobacteria	183925|Methanobacteria	S	Protein of unknown function DUF116	-	-	-	ko:K09729	-	-	-	-	ko00000	-	-	-	DUF116
	NODE_9038_length_1302_cov_0.676596_2	386456.JQKN01000001_gene2084	4.52e-86	256.0	arCOG03197@1|root,arCOG03197@2157|Archaea,2XZKC@28890|Euryarchaeota,23PPA@183925|Methanobacteria	183925|Methanobacteria	-	-	-	-	-	-	-	-	-	-	-	-	-	-	-
	NODE_9038_length_1302_cov_0.676596_3	386456.JQKN01000001_gene2085	6.580000000000001e-32	110.0	arCOG04838@1|root,arCOG04838@2157|Archaea,2Y1E7@28890|Euryarchaeota,23PTY@183925|Methanobacteria	183925|Methanobacteria	-	-	-	-	-	-	-	-	-	-	-	-	-	-	-
	NODE_9038_length_1302_cov_0.676596_4	868131.MSWAN_0373	4.48e-25	103.0	COG1239@1|root,COG1240@1|root,arCOG05423@1|root,arCOG00438@2157|Archaea,arCOG05423@2157|Archaea,arCOG06472@2157|Archaea,2XUP4@28890|Euryarchaeota	28890|Euryarchaeota	H	magnesium chelatase	chlID	-	6.6.1.1	ko:K03404,ko:K03405	ko00860,ko01100,ko01110,map00860,map01100,map01110	-	R03877	RC01012	ko00000,ko00001,ko01000	-	-	-	Mg_chelatase,VWA_2
	NODE_8919_length_1322_cov_0.589958_1	74546.PMT9312_1303	7.21e-108	321.0	COG0022@1|root,COG0022@2|Bacteria,1GIZ5@1117|Cyanobacteria,1MNRP@1212|Prochloraceae	1117|Cyanobacteria	C	Alternative locus ID	-	-	1.2.4.1	ko:K00162	ko00010,ko00020,ko00620,ko01100,ko01110,ko01120,ko01130,ko01200,ko04066,ko04922,ko05230,map00010,map00020,map00620,map01100,map01110,map01120,map01130,map01200,map04066,map04922,map05230	M00307	R00014,R00209,R01699,R03270	RC00004,RC00027,RC00627,RC02742,RC02744,RC02882	br01601,ko00000,ko00001,ko00002,ko01000	-	-	-	Transket_pyr,Transketolase_C
	NODE_8919_length_1322_cov_0.589958_2	237368.SCABRO_00211	4.4200000000000003e-66	211.0	COG0500@1|root,COG2226@2|Bacteria	2|Bacteria	Q	methyltransferase	-	-	-	-	-	-	-	-	-	-	-	-	Methyltransf_11,Methyltransf_23
	NODE_8842_length_1336_cov_0.478081_1	386456.JQKN01000005_gene509	1.1700000000000002e-43	153.0	COG0463@1|root,arCOG01385@2157|Archaea,2XZI8@28890|Euryarchaeota	28890|Euryarchaeota	M	Glycosyltransferase like family 2	-	-	-	-	-	-	-	-	-	-	-	-	Glycos_transf_2
	NODE_8842_length_1336_cov_0.478081_2	386456.JQKN01000005_gene511	1.69e-120	348.0	COG0247@1|root,arCOG00333@2157|Archaea,2Y85G@28890|Euryarchaeota,23PDX@183925|Methanobacteria	183925|Methanobacteria	C	Cysteine-rich domain	-	-	-	-	-	-	-	-	-	-	-	-	CCG
	NODE_8842_length_1336_cov_0.478081_3	386456.JQKN01000005_gene512	8.18e-14	71.6	COG1139@1|root,arCOG00335@2157|Archaea,2Y85J@28890|Euryarchaeota,23PHX@183925|Methanobacteria	183925|Methanobacteria	C	LUD domain	-	-	-	ko:K00782	-	-	-	-	ko00000	-	-	-	Fer4_8,LUD_dom
	NODE_8802_length_1344_cov_1.307313_1	386456.JQKN01000014_gene3091	9.98e-208	590.0	COG2244@1|root,arCOG02209@2157|Archaea,2XVDT@28890|Euryarchaeota,23NPY@183925|Methanobacteria	183925|Methanobacteria	S	MviN-like protein	-	-	-	-	-	-	-	-	-	-	-	-	Polysacc_synt,Polysacc_synt_C
	NODE_8470_length_1410_cov_1.063133_1	868131.MSWAN_0463	1.0300000000000001e-22	88.6	COG1997@1|root,arCOG04208@2157|Archaea,2XYWD@28890|Euryarchaeota,23P4A@183925|Methanobacteria	183925|Methanobacteria	J	50S ribosomal protein L37Ae	rpl37ae	-	-	ko:K02921	ko03010,map03010	M00177,M00179	-	-	br01610,ko00000,ko00001,ko00002,ko03011	-	-	-	Ribosomal_L37ae
	NODE_8470_length_1410_cov_1.063133_2	386456.JQKN01000001_gene1680	5.25e-149	424.0	COG2123@1|root,arCOG01574@2157|Archaea,2XWTK@28890|Euryarchaeota,23NYE@183925|Methanobacteria	183925|Methanobacteria	J	Non-catalytic component of the exosome, which is a complex involved in RNA degradation. Contributes to the structuring of the Rrp41 active site	rrp42	-	-	ko:K12589	ko03018,map03018	M00390,M00391	-	-	ko00000,ko00001,ko00002,ko03019	-	-	-	RNase_PH,RNase_PH_C
	NODE_8470_length_1410_cov_1.063133_3	386456.JQKN01000001_gene1679	2.47e-35	126.0	COG0689@1|root,arCOG01575@2157|Archaea,2XVHI@28890|Euryarchaeota,23NWI@183925|Methanobacteria	183925|Methanobacteria	J	Catalytic component of the exosome, which is a complex involved in RNA degradation. Has 3'- 5' exoribonuclease activity. Can also synthesize heteropolymeric RNA-tails	rrp41	-	-	ko:K11600	ko03018,map03018	M00390,M00391	-	-	ko00000,ko00001,ko00002,ko03019	-	-	-	RNase_PH,RNase_PH_C
	NODE_8281_length_1447_cov_0.601515_2	386456.JQKN01000013_gene3020	6.08e-63	206.0	COG1408@1|root,arCOG01156@2157|Archaea,2Y1DW@28890|Euryarchaeota,23PMV@183925|Methanobacteria	183925|Methanobacteria	S	Calcineurin-like phosphoesterase superfamily domain	-	-	-	ko:K07098	-	-	-	-	ko00000	-	-	-	Metallophos
	NODE_8281_length_1447_cov_0.601515_3	386456.JQKN01000008_gene1389	1.13e-28	116.0	COG0433@1|root,arCOG00280@2157|Archaea,2XZQZ@28890|Euryarchaeota	28890|Euryarchaeota	L	Domain of unknown function DUF87	-	-	-	ko:K06915	-	-	-	-	ko00000	-	-	-	DUF87
	NODE_7962_length_1519_cov_1.507184_1	1218084.BBJK01000173_gene7896	7.000000000000001e-119	353.0	COG0601@1|root,COG0601@2|Bacteria,1MU8Z@1224|Proteobacteria,2VNVT@28216|Betaproteobacteria,1K1FP@119060|Burkholderiaceae	28216|Betaproteobacteria	P	PFAM binding-protein-dependent transport systems inner membrane component	-	-	-	ko:K02033	ko02024,map02024	M00239	-	-	ko00000,ko00001,ko00002,ko02000	3.A.1.5	-	-	BPD_transp_1
	NODE_7962_length_1519_cov_1.507184_2	1122214.AQWH01000008_gene1497	3.67e-48	165.0	COG1173@1|root,COG1173@2|Bacteria,1MW3R@1224|Proteobacteria,2TUCW@28211|Alphaproteobacteria,2PKK0@255475|Aurantimonadaceae	28211|Alphaproteobacteria	U	N-terminal TM domain of oligopeptide transport permease C	-	-	-	ko:K02034	ko02024,map02024	M00239	-	-	ko00000,ko00001,ko00002,ko02000	3.A.1.5	-	-	BPD_transp_1,OppC_N
	NODE_7904_length_1534_cov_1.552950_1	1220534.B655_0651	1.86e-122	373.0	2DZ66@1|root,2N56N@2157|Archaea,2Y3V8@28890|Euryarchaeota	28890|Euryarchaeota	S	Alcohol acetyltransferase	-	-	-	-	-	-	-	-	-	-	-	-	AATase
	NODE_7868_length_1543_cov_0.501412_1	386456.JQKN01000002_gene2709	1.69e-48	159.0	COG1846@1|root,arCOG03182@2157|Archaea,2Y4F4@28890|Euryarchaeota	28890|Euryarchaeota	K	Regulatory protein MarR	-	-	-	-	-	-	-	-	-	-	-	-	MarR,MarR_2
	NODE_7868_length_1543_cov_0.501412_2	386456.JQKN01000002_gene2709	6.88e-06	47.4	COG1846@1|root,arCOG03182@2157|Archaea,2Y4F4@28890|Euryarchaeota	28890|Euryarchaeota	K	Regulatory protein MarR	-	-	-	-	-	-	-	-	-	-	-	-	MarR,MarR_2
	NODE_7868_length_1543_cov_0.501412_3	386456.JQKN01000002_gene2712	4.4e-103	305.0	COG0519@1|root,arCOG00085@2157|Archaea,2XT82@28890|Euryarchaeota,23NX7@183925|Methanobacteria	183925|Methanobacteria	F	Catalyzes the synthesis of GMP from XMP	guaAB	-	6.3.5.2	ko:K01951	ko00230,ko00983,ko01100,map00230,map00983,map01100	M00050	R01230,R01231,R08244	RC00010,RC00204	ko00000,ko00001,ko00002,ko01000,ko01002	-	-	-	GMP_synt_C,NAD_synthase
	NODE_7803_length_1559_cov_3.900140_1	1341181.FLJC2902T_22200	6.88e-64	213.0	COG4123@1|root,COG4123@2|Bacteria,4NGDY@976|Bacteroidetes,1HZFW@117743|Flavobacteriia,2NVJ4@237|Flavobacterium	976|Bacteroidetes	S	Dimerisation domain	-	-	-	-	-	-	-	-	-	-	-	-	Dimerisation2,Methyltransf_2
	NODE_7784_length_1566_cov_0.804726_1	304371.MCP_2219	1.73e-76	241.0	COG2106@1|root,arCOG04069@2157|Archaea,2XSZI@28890|Euryarchaeota	28890|Euryarchaeota	S	Putative RNA methyltransferase	-	-	-	ko:K09142	-	-	-	-	ko00000	-	-	-	Methyltrn_RNA_3
	NODE_7784_length_1566_cov_0.804726_2	1230457.C476_07483	1.46e-39	142.0	COG0087@1|root,arCOG04070@2157|Archaea,2XT9B@28890|Euryarchaeota,23S4Y@183963|Halobacteria	183963|Halobacteria	J	One of the primary rRNA binding proteins, it binds directly near the 3'-end of the 23S rRNA, where it nucleates assembly of the 50S subunit	rpl3	-	-	ko:K02906	ko03010,map03010	M00178,M00179	-	-	br01610,ko00000,ko00001,ko00002,ko03011	-	-	-	Ribosomal_L3
	NODE_7707_length_1587_cov_1.113699_1	868131.MSWAN_1884	3.92e-152	432.0	COG1145@1|root,arCOG00296@2157|Archaea,2XUE5@28890|Euryarchaeota	28890|Euryarchaeota	C	PFAM 4Fe-4S ferredoxin, iron-sulfur binding domain protein	-	-	-	-	-	-	-	-	-	-	-	-	Fer4,Fer4_21,Fer4_9
	NODE_7695_length_1589_cov_0.493160_1	1220534.B655_2341	1.23e-08	53.1	arCOG07909@1|root,arCOG07909@2157|Archaea	2157|Archaea	-	-	-	-	-	-	-	-	-	-	-	-	-	-	-
	NODE_7695_length_1589_cov_0.493160_2	386456.JQKN01000001_gene1690	4.0099999999999997e-128	374.0	COG0524@1|root,arCOG00016@2157|Archaea,2Y1CI@28890|Euryarchaeota,23PKJ@183925|Methanobacteria	183925|Methanobacteria	G	pfkB family carbohydrate kinase	-	-	-	-	-	-	-	-	-	-	-	-	PfkB
	NODE_7695_length_1589_cov_0.493160_3	386456.JQKN01000001_gene1689	4.7899999999999993e-54	177.0	COG1411@1|root,arCOG00616@2157|Archaea,2XYJ0@28890|Euryarchaeota,23P3Y@183925|Methanobacteria	183925|Methanobacteria	E	Belongs to the HisA HisF family	hisAF	-	5.3.1.16	ko:K01814	ko00340,ko01100,ko01110,ko01230,map00340,map01100,map01110,map01230	M00026	R04640	RC00945	ko00000,ko00001,ko00002,ko01000	-	-	-	His_biosynth
	NODE_7691_length_1590_cov_0.674641_1	1220534.B655_2223	8.67e-24	96.7	arCOG06478@1|root,arCOG06478@2157|Archaea	2157|Archaea	S	Short repeat of unknown function (DUF308)	-	-	-	-	-	-	-	-	-	-	-	-	DUF308
	NODE_7691_length_1590_cov_0.674641_2	386456.JQKN01000001_gene2310	2.1e-17	82.4	COG0628@1|root,arCOG02642@2157|Archaea,2XU4M@28890|Euryarchaeota	28890|Euryarchaeota	S	Permease	-	-	-	-	-	-	-	-	-	-	-	-	AI-2E_transport
	NODE_7691_length_1590_cov_0.674641_3	386456.JQKN01000001_gene2310	1.25e-124	363.0	COG0628@1|root,arCOG02642@2157|Archaea,2XU4M@28890|Euryarchaeota	28890|Euryarchaeota	S	Permease	-	-	-	-	-	-	-	-	-	-	-	-	AI-2E_transport
	NODE_7663_length_1597_cov_0.467347_1	386456.JQKN01000018_gene597	1.6699999999999998e-45	159.0	COG1311@1|root,arCOG04455@2157|Archaea,2XSUG@28890|Euryarchaeota,23NMR@183925|Methanobacteria	183925|Methanobacteria	L	Possesses two activities a DNA synthesis (polymerase) and an exonucleolytic activity that degrades single-stranded DNA in the 3' to 5' direction. Has a template-primer preference which is characteristic of a replicative DNA polymerase	polB	-	2.7.7.7	ko:K02323	ko00230,ko00240,ko01100,ko03030,map00230,map00240,map01100,map03030	M00264	R00375,R00376,R00377,R00378	RC02795	ko00000,ko00001,ko00002,ko01000,ko03032	-	-	-	DNA_pol_E_B
	NODE_7663_length_1597_cov_0.467347_2	386456.JQKN01000018_gene596	4.45e-97	287.0	COG0235@1|root,arCOG04226@2157|Archaea,2XX10@28890|Euryarchaeota,23P5P@183925|Methanobacteria	183925|Methanobacteria	G	Class II aldolase	-	-	4.1.2.17	ko:K01628	ko00051,ko01120,map00051,map01120	-	R02262	RC00603,RC00604	ko00000,ko00001,ko01000	-	-	-	Aldolase_II
	NODE_7663_length_1597_cov_0.467347_3	386456.JQKN01000018_gene594	9.32e-39	130.0	COG1698@1|root,arCOG04308@2157|Archaea,2XZVX@28890|Euryarchaeota	28890|Euryarchaeota	S	Belongs to the UPF0147 family	-	-	-	ko:K09721	-	-	-	-	ko00000	-	-	-	UPF0147
	NODE_7599_length_1613_cov_0.858681_2	1321815.HMPREF9193_01072	9.41e-93	284.0	COG0330@1|root,COG0330@2|Bacteria,2J73X@203691|Spirochaetes	203691|Spirochaetes	O	PFAM SPFH domain Band 7 family	-	-	-	-	-	-	-	-	-	-	-	-	Band_7,Band_7_C
	NODE_7547_length_1627_cov_1.070000_1	386456.JQKN01000007_gene3349	4.94e-104	312.0	COG1527@1|root,arCOG02459@2157|Archaea,2XTK5@28890|Euryarchaeota,23NMG@183925|Methanobacteria	183925|Methanobacteria	C	Produces ATP from ADP in the presence of a proton gradient across the membrane	atpC	-	-	ko:K02119	ko00190,ko01100,map00190,map01100	M00159	-	-	ko00000,ko00001,ko00002	3.A.2.2,3.A.2.3	-	-	vATP-synt_AC39
	NODE_7547_length_1627_cov_1.070000_2	386456.JQKN01000007_gene3348	1.83e-76	235.0	COG1390@1|root,arCOG00869@2157|Archaea,2Y782@28890|Euryarchaeota,23P3B@183925|Methanobacteria	183925|Methanobacteria	C	Produces ATP from ADP in the presence of a proton gradient across the membrane	atpE	-	-	ko:K02121	ko00190,ko01100,map00190,map01100	M00159	-	-	ko00000,ko00001,ko00002	3.A.2.2,3.A.2.3	-	-	vATP-synt_E
	NODE_7547_length_1627_cov_1.070000_3	634498.mru_0697	2.5800000000000004e-27	103.0	COG0636@1|root,arCOG02455@2157|Archaea,2XU5U@28890|Euryarchaeota,23PJJ@183925|Methanobacteria	183925|Methanobacteria	C	Belongs to the V-ATPase proteolipid subunit family	ahaK	-	-	ko:K02124	ko00190,ko01100,map00190,map01100	M00159	-	-	ko00000,ko00001,ko00002	3.A.2.2,3.A.2.3	-	-	ATP-synt_C
	NODE_7463_length_1647_cov_0.475658_1	386456.JQKN01000018_gene598	2.17e-47	158.0	arCOG09687@1|root,arCOG09687@2157|Archaea	2157|Archaea	-	-	-	-	-	-	-	-	-	-	-	-	-	-	-
	NODE_7463_length_1647_cov_0.475658_2	386456.JQKN01000018_gene597	9.61e-113	340.0	COG1311@1|root,arCOG04455@2157|Archaea,2XSUG@28890|Euryarchaeota,23NMR@183925|Methanobacteria	183925|Methanobacteria	L	Possesses two activities a DNA synthesis (polymerase) and an exonucleolytic activity that degrades single-stranded DNA in the 3' to 5' direction. Has a template-primer preference which is characteristic of a replicative DNA polymerase	polB	-	2.7.7.7	ko:K02323	ko00230,ko00240,ko01100,ko03030,map00230,map00240,map01100,map03030	M00264	R00375,R00376,R00377,R00378	RC02795	ko00000,ko00001,ko00002,ko01000,ko03032	-	-	-	DNA_pol_E_B
	NODE_7443_length_1653_cov_0.971822_1	386456.JQKN01000002_gene2599	5.24e-49	160.0	arCOG10244@1|root,arCOG10244@2157|Archaea	386456.JQKN01000002_gene2599|-	-	-	-	-	-	-	-	-	-	-	-	-	-	-	-
	NODE_7443_length_1653_cov_0.971822_2	386456.JQKN01000002_gene2598	2.29e-127	369.0	COG0101@1|root,arCOG04449@2157|Archaea,2XTH5@28890|Euryarchaeota,23NZW@183925|Methanobacteria	183925|Methanobacteria	J	Formation of pseudouridine at positions 38, 39 and 40 in the anticodon stem and loop of transfer RNAs	truA	-	5.4.99.12	ko:K06173	-	-	-	-	ko00000,ko01000,ko03016	-	-	-	PseudoU_synth_1
	NODE_7392_length_1667_cov_0.866234_1	1144888.CM001467_gene40	7.04e-103	306.0	COG1192@1|root,COG1192@2|Bacteria,1MV43@1224|Proteobacteria,2TSWH@28211|Alphaproteobacteria,47EWD@766|Rickettsiales	766|Rickettsiales	D	involved in chromosome partitioning	parA	-	-	ko:K03496	-	-	-	-	ko00000,ko03036,ko04812	-	-	-	AAA_31
	NODE_7392_length_1667_cov_0.866234_2	357244.OTBS_1041	1.63e-66	216.0	COG1475@1|root,COG1475@2|Bacteria,1MW2E@1224|Proteobacteria,2TSTN@28211|Alphaproteobacteria,47F6R@766|Rickettsiales	766|Rickettsiales	K	Belongs to the ParB family	parB	-	-	ko:K03497	-	-	-	-	ko00000,ko03000,ko03036,ko04812	-	-	-	ParBc
	NODE_7378_length_1670_cov_0.610499_1	386456.JQKN01000022_gene62	8.229999999999999e-104	316.0	COG5621@1|root,arCOG12321@2157|Archaea,2Y2ME@28890|Euryarchaeota	28890|Euryarchaeota	S	Lipocalin-like domain	-	-	-	-	-	-	-	-	-	-	-	-	CrtC,Lipocalin_9
	NODE_7231_length_1706_cov_0.955035_1	697282.Mettu_3170	5.3799999999999995e-186	543.0	COG0513@1|root,COG0513@2|Bacteria,1MU49@1224|Proteobacteria,1RMWA@1236|Gammaproteobacteria,1XER8@135618|Methylococcales	135618|Methylococcales	JKL	DEAD-box RNA helicase involved in various cellular processes at low temperature, including ribosome biogenesis, mRNA degradation and translation initiation	deaD	-	3.6.4.13	ko:K05592	ko03018,map03018	-	-	-	ko00000,ko00001,ko01000,ko03009,ko03019	-	-	-	DEAD,DbpA,Helicase_C
	NODE_7198_length_1713_cov_0.582598_1	452659.RrIowa_1273	1.48e-87	261.0	COG1670@1|root,COG1670@2|Bacteria,1N619@1224|Proteobacteria,2UDSR@28211|Alphaproteobacteria,47FSU@766|Rickettsiales	766|Rickettsiales	J	COG1670 Acetyltransferases, including N-acetylases of ribosomal proteins	rimJ	-	2.3.1.128	ko:K03790	-	-	-	-	ko00000,ko01000,ko03009	-	-	-	Acetyltransf_3
	NODE_7198_length_1713_cov_0.582598_2	272951.rsib_orf1028	5.65e-107	314.0	COG0603@1|root,COG0603@2|Bacteria,1MU5V@1224|Proteobacteria,2TU7F@28211|Alphaproteobacteria	28211|Alphaproteobacteria	F	Catalyzes the ATP-dependent conversion of 7-carboxy-7- deazaguanine (CDG) to 7-cyano-7-deazaguanine (preQ(0))	queC	-	6.3.4.20	ko:K06920	ko00790,ko01100,map00790,map01100	-	R09978	RC00959	ko00000,ko00001,ko01000,ko03016	-	-	-	QueC
	NODE_7178_length_1720_cov_0.541745_2	386456.JQKN01000007_gene3267	4.1400000000000003e-85	259.0	COG1994@1|root,arCOG00614@2157|Archaea,2XX7B@28890|Euryarchaeota,23PMM@183925|Methanobacteria	183925|Methanobacteria	S	Peptidase M50	-	-	-	-	-	-	-	-	-	-	-	-	-
	NODE_7178_length_1720_cov_0.541745_3	386456.JQKN01000007_gene3270	1.2700000000000002e-79	239.0	COG0537@1|root,arCOG00419@2157|Archaea	2157|Archaea	FG	COG0537 Diadenosine tetraphosphate (Ap4A) hydrolase and other HIT family	-	-	2.7.7.53	ko:K19710	ko00230,map00230	-	R00126,R01618	RC00002,RC02753,RC02795	ko00000,ko00001,ko01000	-	-	-	HIT
	NODE_7105_length_1738_cov_0.760397_1	386456.JQKN01000002_gene2662	1.6e-233	655.0	COG0769@1|root,arCOG02820@2157|Archaea,2XVZG@28890|Euryarchaeota,23NVK@183925|Methanobacteria	183925|Methanobacteria	M	Mur ligase middle domain	-	-	6.3.2.13,6.3.2.8	ko:K01924,ko:K01928	ko00300,ko00471,ko00550,ko01100,map00300,map00471,map00550,map01100	-	R02788,R03193	RC00064,RC00090,RC00141	ko00000,ko00001,ko01000,ko01011	-	-	-	Mur_ligase_C,Mur_ligase_M
	NODE_7105_length_1738_cov_0.760397_2	386456.JQKN01000002_gene2661	2.99e-23	96.7	COG0472@1|root,arCOG03199@2157|Archaea,2XUMW@28890|Euryarchaeota,23NKU@183925|Methanobacteria	183925|Methanobacteria	M	PFAM Glycosyl transferase family 4	-	-	2.7.8.13	ko:K01000	ko00550,ko01100,ko01502,map00550,map01100,map01502	-	R05629,R05630	RC00002,RC02753	ko00000,ko00001,ko01000,ko01011	9.B.146	-	-	Glycos_transf_4,MraY_sig1
	NODE_7103_length_1739_cov_0.913772_1	386456.JQKN01000011_gene742	2.18e-307	854.0	COG1328@1|root,arCOG03714@1|root,arCOG03714@2157|Archaea,arCOG04889@2157|Archaea,2XT2S@28890|Euryarchaeota,23NKA@183925|Methanobacteria	183925|Methanobacteria	F	Ribonucleoside-triphosphate reductase	nrdD	-	1.1.98.6	ko:K21636	ko00230,ko00240,ko01100,map00230,map00240,map01100	M00053	R11633,R11634,R11635,R11636	RC00613	ko00000,ko00001,ko00002,ko01000	-	-	-	ATP-cone,NRDD
	NODE_7103_length_1739_cov_0.913772_2	386456.JQKN01000011_gene739	5.39e-12	65.5	COG0778@1|root,arCOG00289@2157|Archaea,2XXHD@28890|Euryarchaeota,23P6W@183925|Methanobacteria	183925|Methanobacteria	C	Nitroreductase family	-	-	-	-	-	-	-	-	-	-	-	-	Fer4,Nitroreductase
	NODE_7080_length_1743_cov_1.008045_1	877455.Metbo_2363	7.459999999999999e-54	176.0	arCOG14019@1|root,arCOG14019@2157|Archaea	2157|Archaea	-	-	-	-	-	-	-	-	-	-	-	-	-	-	-
	NODE_7080_length_1743_cov_1.008045_2	386456.JQKN01000002_gene2685	5.02e-70	216.0	COG1617@1|root,arCOG02197@2157|Archaea,2Y789@28890|Euryarchaeota,23P8E@183925|Methanobacteria	183925|Methanobacteria	S	Kinase binding protein CGI-121	-	-	-	ko:K09119	-	-	-	-	ko00000,ko03016	-	-	-	CGI-121
	NODE_7080_length_1743_cov_1.008045_3	386456.JQKN01000002_gene2686	9.979999999999999e-104	309.0	arCOG00116@1|root,arCOG00116@2157|Archaea,2XVDZ@28890|Euryarchaeota,23P3A@183925|Methanobacteria	183925|Methanobacteria	S	Belongs to the DegT DnrJ EryC1 family	-	-	-	-	-	-	-	-	-	-	-	-	DegT_DnrJ_EryC1
	NODE_7076_length_1746_cov_1.314392_1	386456.JQKN01000002_gene2381	2.34e-106	311.0	COG1387@1|root,arCOG00304@2157|Archaea,2XVZY@28890|Euryarchaeota,23NXR@183925|Methanobacteria	183925|Methanobacteria	E	DNA polymerase alpha chain like domain	-	-	-	ko:K04477	-	-	-	-	ko00000	-	-	-	PHP
	NODE_7076_length_1746_cov_1.314392_2	386456.JQKN01000003_gene260	8.47e-22	90.5	COG0584@1|root,arCOG00701@2157|Archaea,2XXRI@28890|Euryarchaeota	28890|Euryarchaeota	C	glycerophosphoryl diester phosphodiesterase	glpQ	-	3.1.4.46	ko:K01126	ko00564,map00564	-	R01030,R01470	RC00017,RC00425	ko00000,ko00001,ko01000	-	-	-	GDPD
	NODE_7076_length_1746_cov_1.314392_3	386456.JQKN01000003_gene260	3.1999999999999996e-53	173.0	COG0584@1|root,arCOG00701@2157|Archaea,2XXRI@28890|Euryarchaeota	28890|Euryarchaeota	C	glycerophosphoryl diester phosphodiesterase	glpQ	-	3.1.4.46	ko:K01126	ko00564,map00564	-	R01030,R01470	RC00017,RC00425	ko00000,ko00001,ko01000	-	-	-	GDPD
	NODE_7076_length_1746_cov_1.314392_4	868131.MSWAN_0487	6.69e-05	42.7	arCOG14014@1|root,arCOG14014@2157|Archaea	2157|Archaea	-	-	-	-	-	-	-	-	-	-	-	-	-	-	-
	NODE_7026_length_1766_cov_0.460647_1	386456.JQKN01000016_gene889	3.1e-149	426.0	COG0517@1|root,arCOG00600@2157|Archaea,2XX02@28890|Euryarchaeota,23NYD@183925|Methanobacteria	183925|Methanobacteria	S	Domain in cystathionine beta-synthase and other proteins.	-	-	-	-	-	-	-	-	-	-	-	-	CBS
	NODE_7026_length_1766_cov_0.460647_2	386456.JQKN01000016_gene890	8.38e-146	416.0	COG0517@1|root,arCOG00602@2157|Archaea,2XYM5@28890|Euryarchaeota	28890|Euryarchaeota	S	PFAM CBS domain	-	-	-	-	-	-	-	-	-	-	-	-	CBS
	NODE_7026_length_1766_cov_0.460647_3	386456.JQKN01000016_gene891	1.32e-09	56.6	COG0517@1|root,arCOG00606@2157|Archaea,2XX11@28890|Euryarchaeota,23PS9@183925|Methanobacteria	183925|Methanobacteria	S	Domain in cystathionine beta-synthase and other proteins.	-	-	-	-	-	-	-	-	-	-	-	-	CBS
	NODE_6953_length_1783_cov_7.494565_1	88036.EFJ27196	1.8e-90	286.0	COG1063@1|root,KOG0024@2759|Eukaryota,37JEC@33090|Viridiplantae,3GICV@35493|Streptophyta	35493|Streptophyta	Q	Alcohol dehydrogenase GroES-like domain	-	-	-	-	-	-	-	-	-	-	-	-	ADH_N,ADH_N_assoc,ADH_zinc_N
	NODE_6801_length_1829_cov_0.537015_1	575586.HMPREF0016_00332	0.0	905.0	COG0160@1|root,COG0160@2|Bacteria,1MWY6@1224|Proteobacteria,1RQKU@1236|Gammaproteobacteria,3NJ5V@468|Moraxellaceae	1236|Gammaproteobacteria	E	Belongs to the class-III pyridoxal-phosphate-dependent aminotransferase family	dat	-	2.6.1.76	ko:K00836	ko00260,ko01100,ko01120,ko01210,ko01230,map00260,map01100,map01120,map01210,map01230	M00033	R06977	RC00006,RC00062	ko00000,ko00001,ko00002,ko01000,ko01007	-	-	-	Aminotran_3
	NODE_6801_length_1829_cov_0.537015_2	575586.HMPREF0016_00331	6.48e-102	308.0	COG0076@1|root,COG0076@2|Bacteria,1MWUX@1224|Proteobacteria,1RQ8G@1236|Gammaproteobacteria,3NIHU@468|Moraxellaceae	1236|Gammaproteobacteria	E	Pyridoxal-dependent decarboxylase conserved domain	ddc	-	4.1.1.86	ko:K13745	ko00260,ko01120,map00260,map01120	-	R07650	RC00299	ko00000,ko00001,ko01000	-	-	-	Pyridoxal_deC
	NODE_6656_length_1874_cov_0.974242_1	868131.MSWAN_0016	3.11e-102	300.0	COG0655@1|root,arCOG02573@2157|Archaea,2XVV1@28890|Euryarchaeota,23PJ0@183925|Methanobacteria	183925|Methanobacteria	S	PFAM NADPH-dependent FMN reductase	-	-	-	-	-	-	-	-	-	-	-	-	FMN_red
	NODE_6640_length_1880_cov_0.689675_1	386456.JQKN01000005_gene434	6.24e-133	381.0	COG1321@1|root,arCOG02099@2157|Archaea,2XSWC@28890|Euryarchaeota,23P0S@183925|Methanobacteria	183925|Methanobacteria	K	Iron dependent	-	-	-	ko:K03709	-	-	-	-	ko00000,ko03000	-	-	-	Fe_dep_repr_C,Fe_dep_repress,FeoA
	NODE_6640_length_1880_cov_0.689675_2	386456.JQKN01000005_gene433	4.04e-170	497.0	COG0370@1|root,arCOG00359@2157|Archaea,2XU46@28890|Euryarchaeota,23NWG@183925|Methanobacteria	183925|Methanobacteria	P	Ferrous iron transport protein B	-	-	-	ko:K04759	-	-	-	-	ko00000,ko02000	9.A.8.1	-	-	FeoB_C,FeoB_N,Gate
	NODE_6558_length_1914_cov_0.627868_1	1220534.B655_2192	1.97e-34	127.0	COG4012@1|root,arCOG04365@2157|Archaea,2XUWU@28890|Euryarchaeota,23PCC@183925|Methanobacteria	183925|Methanobacteria	S	Putative pyruvate format-lyase activating enzyme (DUF1786)	-	-	-	-	-	-	-	-	-	-	-	-	DUF1786
	NODE_6558_length_1914_cov_0.627868_2	386456.JQKN01000014_gene3096	1.26e-285	783.0	COG1350@1|root,arCOG01432@2157|Archaea,2Y845@28890|Euryarchaeota,23PBY@183925|Methanobacteria	183925|Methanobacteria	E	The beta subunit is responsible for the synthesis of L- tryptophan from indole and L-serine	-	-	4.2.1.20	ko:K06001	ko00260,ko00400,ko01100,ko01110,ko01130,ko01230,map00260,map00400,map01100,map01110,map01130,map01230	M00023	R00674,R02340,R02722	RC00209,RC00210,RC00700,RC00701,RC02868	ko00000,ko00001,ko00002,ko01000	-	-	-	PALP
	NODE_6459_length_1949_cov_0.794731_1	386456.JQKN01000004_gene152	0.0	1135.0	COG0178@1|root,arCOG04694@2157|Archaea,2XTDU@28890|Euryarchaeota,23NKS@183925|Methanobacteria	183925|Methanobacteria	L	The UvrABC repair system catalyzes the recognition and processing of DNA lesions. UvrA is an ATPase and a DNA-binding protein. A damage recognition complex composed of 2 UvrA and 2 UvrB subunits scans DNA for abnormalities. When the presence of a lesion has been verified by UvrB, the UvrA molecules dissociate	uvrA	-	-	ko:K03701	ko03420,map03420	-	-	-	ko00000,ko00001,ko03400	-	-	-	ABC_tran
	NODE_6406_length_1969_cov_0.889794_1	903818.KI912268_gene1754	1.5599999999999998e-61	192.0	COG1898@1|root,COG1898@2|Bacteria	2|Bacteria	M	dTDP-4-dehydrorhamnose 3,5-epimerase activity	rfbC	-	5.1.3.13	ko:K01790	ko00521,ko00523,ko01130,map00521,map00523,map01130	M00793	R06514	RC01531	ko00000,ko00001,ko00002,ko01000	-	-	-	dTDP_sugar_isom
	NODE_6406_length_1969_cov_0.889794_2	903818.KI912268_gene1753	8.789999999999999e-120	348.0	COG1209@1|root,COG1209@2|Bacteria,3Y2ZJ@57723|Acidobacteria	57723|Acidobacteria	M	Catalyzes the formation of dTDP-glucose, from dTTP and glucose 1-phosphate, as well as its pyrophosphorolysis	-	-	2.7.7.24	ko:K00973	ko00521,ko00523,ko00525,ko01130,map00521,map00523,map00525,map01130	M00793	R02328	RC00002	ko00000,ko00001,ko00002,ko01000	-	-	-	NTP_transferase
	NODE_6406_length_1969_cov_0.889794_3	543728.Vapar_2744	1.47e-72	238.0	COG1123@1|root,COG4172@2|Bacteria,1MU09@1224|Proteobacteria,2VH5T@28216|Betaproteobacteria,4AAM3@80864|Comamonadaceae	28216|Betaproteobacteria	P	Belongs to the ABC transporter superfamily	gsiA	-	-	ko:K02031,ko:K02032,ko:K13896	ko02010,ko02024,map02010,map02024	M00239,M00349	-	-	ko00000,ko00001,ko00002,ko02000	3.A.1.5,3.A.1.5.21,3.A.1.5.24	-	-	ABC_tran,oligo_HPY
	NODE_6389_length_1976_cov_0.743104_3	386456.JQKN01000008_gene1390	4.07e-69	232.0	COG0420@1|root,arCOG00397@2157|Archaea,2XWH1@28890|Euryarchaeota	28890|Euryarchaeota	L	Part of the Rad50 Mre11 complex, which is involved in the early steps of DNA double-strand break (DSB) repair. The complex may facilitate opening of the processed DNA ends to aid in the recruitment of HerA and NurA. Mre11 binds to DSB ends and has both double-stranded 3'-5' exonuclease activity and single- stranded endonuclease activity	mre11	-	-	ko:K03547	-	-	-	-	ko00000,ko03400	-	-	-	Metallophos
	NODE_6350_length_1989_cov_0.901719_1	765952.PUV_25430	7.85e-150	433.0	COG0859@1|root,COG0859@2|Bacteria,2JFNJ@204428|Chlamydiae	204428|Chlamydiae	M	Glycosyltransferase family 9 (heptosyltransferase)	rfaF	-	-	ko:K02843	ko00540,ko01100,map00540,map01100	M00080	-	-	ko00000,ko00001,ko00002,ko01000,ko01003,ko01005	-	GT9	-	Glyco_transf_9
	NODE_6350_length_1989_cov_0.901719_2	264201.pc0182	4.89e-94	285.0	COG1682@1|root,COG1682@2|Bacteria,2JGGU@204428|Chlamydiae	204428|Chlamydiae	GM	ABC-2 type transporter	-	-	-	ko:K09690	ko02010,map02010	M00250	-	-	ko00000,ko00001,ko00002,ko02000	3.A.1.103	-	-	ABC2_membrane
	NODE_6331_length_1994_cov_0.610605_1	386456.JQKN01000002_gene2660	1.4699999999999998e-119	353.0	COG0458@1|root,arCOG01596@2157|Archaea,2XTZE@28890|Euryarchaeota,23NUY@183925|Methanobacteria	183925|Methanobacteria	E	ATP-grasp domain	-	-	-	-	-	-	-	-	-	-	-	-	ATP-grasp_3,CPSase_L_D2
	NODE_6331_length_1994_cov_0.610605_2	386456.JQKN01000002_gene2659	1.7899999999999999e-62	193.0	COG0599@1|root,arCOG02148@2157|Archaea,2Y09M@28890|Euryarchaeota	28890|Euryarchaeota	S	PFAM Carboxymuconolactone decarboxylase	-	-	4.1.1.44	ko:K01607	ko00362,ko01100,ko01120,ko01220,map00362,map01100,map01120,map01220	-	R03470	RC00938	ko00000,ko00001,ko01000	-	-	-	CMD
	NODE_6331_length_1994_cov_0.610605_4	386456.JQKN01000002_gene2657	5.82e-06	48.1	COG4076@1|root,arCOG04843@2157|Archaea,2XVYG@28890|Euryarchaeota,23P44@183925|Methanobacteria	183925|Methanobacteria	Q	Ribosomal RNA adenine dimethylase	-	-	-	-	-	-	-	-	-	-	-	-	Methyltransf_25,Methyltransf_31,PrmA
	NODE_6321_length_1996_cov_0.928304_1	272951.rsib_orf84	1.36e-231	655.0	COG0595@1|root,COG0595@2|Bacteria,1MUGV@1224|Proteobacteria,2TQTR@28211|Alphaproteobacteria,47EU4@766|Rickettsiales	766|Rickettsiales	S	metallo-beta-lactamase	-	-	-	ko:K12574	ko03018,map03018	-	-	-	ko00000,ko00001,ko01000,ko03019	-	-	-	Lactamase_B,Lactamase_B_2,RMMBL
	NODE_6258_length_2018_cov_0.864093_1	386456.JQKN01000002_gene2818	9.439999999999999e-274	771.0	COG0365@1|root,arCOG01529@2157|Archaea,2XTAB@28890|Euryarchaeota,23NWY@183925|Methanobacteria	183925|Methanobacteria	I	TIGRFAM Acetate-CoA ligase	-	-	6.2.1.1	ko:K01895	ko00010,ko00620,ko00640,ko00680,ko00720,ko01100,ko01110,ko01120,ko01130,ko01200,map00010,map00620,map00640,map00680,map00720,map01100,map01110,map01120,map01130,map01200	M00357	R00235,R00236,R00316,R00926,R01354	RC00004,RC00012,RC00043,RC00070,RC02746,RC02816	ko00000,ko00001,ko00002,ko01000,ko01004	-	-	-	ACAS_N,AMP-binding,AMP-binding_C
	NODE_6252_length_2020_cov_0.605917_1	1046625.AFQY01000004_gene2672	2.9600000000000002e-33	124.0	COG1004@1|root,COG1004@2|Bacteria,1MW5U@1224|Proteobacteria,1RMVW@1236|Gammaproteobacteria,3NJSX@468|Moraxellaceae	1236|Gammaproteobacteria	M	Belongs to the UDP-glucose GDP-mannose dehydrogenase family	ugd	-	1.1.1.22	ko:K00012	ko00040,ko00053,ko00520,ko01100,map00040,map00053,map00520,map01100	M00014,M00129,M00361,M00362	R00286	RC00291	ko00000,ko00001,ko00002,ko01000	-	-	-	UDPG_MGDP_dh,UDPG_MGDP_dh_C,UDPG_MGDP_dh_N
	NODE_6252_length_2020_cov_0.605917_2	1046625.AFQY01000004_gene2673	5.8899999999999996e-229	629.0	COG0115@1|root,COG0115@2|Bacteria,1MVB0@1224|Proteobacteria,1RP6Z@1236|Gammaproteobacteria,3NK5G@468|Moraxellaceae	1236|Gammaproteobacteria	E	Belongs to the class-IV pyridoxal-phosphate-dependent aminotransferase family	ilvE	GO:0003674,GO:0003824,GO:0004084,GO:0005488,GO:0005515,GO:0005575,GO:0005622,GO:0005623,GO:0005737,GO:0005829,GO:0006082,GO:0006520,GO:0006531,GO:0006532,GO:0006551,GO:0006573,GO:0006807,GO:0008150,GO:0008152,GO:0008483,GO:0008652,GO:0009058,GO:0009066,GO:0009067,GO:0009081,GO:0009082,GO:0009098,GO:0009099,GO:0009987,GO:0016053,GO:0016740,GO:0016769,GO:0019752,GO:0042802,GO:0043436,GO:0043648,GO:…	2.6.1.42	ko:K00826	ko00270,ko00280,ko00290,ko00770,ko01100,ko01110,ko01130,ko01210,ko01230,map00270,map00280,map00290,map00770,map01100,map01110,map01130,map01210,map01230	M00019,M00036,M00119,M00570	R01090,R01214,R02199,R10991	RC00006,RC00036	ko00000,ko00001,ko00002,ko01000,ko01007	-	-	iB21_1397.B21_03597,iECBD_1354.ECBD_4269,iECB_1328.ECB_03648,iECD_1391.ECD_03648,iECO103_1326.ECO103_4394	Aminotran_4
	NODE_6252_length_2020_cov_0.605917_3	1046625.AFQY01000004_gene2674	5.449999999999999e-180	526.0	COG1391@1|root,COG1391@2|Bacteria,1MU4I@1224|Proteobacteria,1RP9N@1236|Gammaproteobacteria,3NJBF@468|Moraxellaceae	1236|Gammaproteobacteria	H	Involved in the regulation of glutamine synthetase GlnA, a key enzyme in the process to assimilate ammonia. When cellular nitrogen levels are high, the C-terminal adenylyl transferase (AT) inactivates GlnA by covalent transfer of an adenylyl group from ATP to specific tyrosine residue of GlnA, thus reducing its activity. Conversely, when nitrogen levels are low, the N-terminal adenylyl removase (…	glnE	GO:0000166,GO:0000287,GO:0000820,GO:0003674,GO:0003824,GO:0005488,GO:0005524,GO:0005575,GO:0005622,GO:0005623,GO:0005737,GO:0005829,GO:0006082,GO:0006520,GO:0006521,GO:0006541,GO:0006542,GO:0006807,GO:0008144,GO:0008150,GO:0008152,GO:0008652,GO:0008882,GO:0009058,GO:0009064,GO:0009084,GO:0009987,GO:0010565,GO:0016053,GO:0016740,GO:0016772,GO:0016779,GO:0017076,GO:0019222,GO:0019752,GO:0030554,GO:…	2.7.7.42,2.7.7.89	ko:K00982	-	-	-	-	ko00000,ko01000	-	-	-	GlnD_UR_UTase,GlnE
	NODE_6206_length_2038_cov_0.548404_1	386456.JQKN01000007_gene3261	2.31e-12	65.9	arCOG10259@1|root,arCOG10259@2157|Archaea	2157|Archaea	-	-	-	-	-	-	-	-	-	-	-	-	-	-	-
	NODE_6206_length_2038_cov_0.548404_2	1220534.B655_1409	5.77e-91	270.0	COG2041@1|root,arCOG00266@2157|Archaea	2157|Archaea	P	COG2041 Sulfite oxidase and related enzymes	-	-	-	-	-	-	-	-	-	-	-	-	Ni_hydr_CYTB,Oxidored_molyb
	NODE_6206_length_2038_cov_0.548404_3	304371.MCP_2089	7.33e-10	58.9	arCOG09498@1|root,arCOG09498@2157|Archaea,2Y5MP@28890|Euryarchaeota,2NBCR@224756|Methanomicrobia	224756|Methanomicrobia	-	-	-	-	-	-	-	-	-	-	-	-	-	-	-
	NODE_6206_length_2038_cov_0.548404_4	386456.JQKN01000007_gene3266	2.46e-162	464.0	COG1944@1|root,arCOG02882@2157|Archaea,2XUE0@28890|Euryarchaeota,23NW8@183925|Methanobacteria	183925|Methanobacteria	S	methanogenesis marker protein 1	-	-	-	ko:K09136	-	-	-	-	ko00000,ko03009	-	-	-	YcaO
	NODE_6057_length_2097_cov_1.225888_1	386456.JQKN01000013_gene3068	8.72e-145	430.0	COG0574@1|root,arCOG01111@2157|Archaea,2XU2T@28890|Euryarchaeota,23NJM@183925|Methanobacteria	183925|Methanobacteria	G	Catalyzes the phosphorylation of pyruvate to phosphoenolpyruvate	ppsA	-	2.7.9.2	ko:K01007	ko00620,ko00680,ko00720,ko01100,ko01120,ko01200,map00620,map00680,map00720,map01100,map01120,map01200	M00173,M00374	R00199	RC00002,RC00015	ko00000,ko00001,ko00002,ko01000	-	-	-	PEP-utilizers,PEP-utilizers_C,PPDK_N
	NODE_6057_length_2097_cov_1.225888_2	386456.JQKN01000013_gene3067	3.09e-96	281.0	COG0197@1|root,arCOG04113@2157|Archaea,2XTHT@28890|Euryarchaeota,23P09@183925|Methanobacteria	183925|Methanobacteria	J	Belongs to the universal ribosomal protein uL16 family	rpl10e	-	-	ko:K02866	ko03010,map03010	M00177,M00179	-	-	br01610,ko00000,ko00001,ko00002,ko03011	-	-	-	Ribosomal_L16
	NODE_6057_length_2097_cov_1.225888_3	386456.JQKN01000013_gene3066	5.49e-145	412.0	COG3640@1|root,arCOG00587@2157|Archaea,2XW7J@28890|Euryarchaeota	28890|Euryarchaeota	D	PFAM Cobyrinic acid a,c-diamide synthase	-	-	-	ko:K07321	-	-	-	-	ko00000	-	-	-	CbiA
	NODE_6011_length_2110_cov_2.452849_2	1444711.CCJF01000005_gene622	1.3700000000000001e-125	375.0	COG1134@1|root,COG1134@2|Bacteria,2JGB8@204428|Chlamydiae	204428|Chlamydiae	GM	ABC transporter	-	-	-	ko:K09691	ko02010,map02010	M00250	-	-	ko00000,ko00001,ko00002,ko02000	3.A.1.103	-	-	ABC_tran
	NODE_6007_length_2111_cov_1.180948_1	91604.ID47_05475	3e-27	111.0	COG3039@1|root,COG3039@2|Bacteria,1MXTN@1224|Proteobacteria,2TYT4@28211|Alphaproteobacteria,47EXJ@766|Rickettsiales	766|Rickettsiales	L	Transposase DDE domain	-	-	-	-	-	-	-	-	-	-	-	-	DDE_Tnp_1,DDE_Tnp_1_5
	NODE_6007_length_2111_cov_1.180948_2	521045.Kole_0088	2.29e-86	259.0	COG4974@1|root,COG4974@2|Bacteria	2|Bacteria	L	Belongs to the 'phage' integrase family	-	-	-	-	-	-	-	-	-	-	-	-	PRiA4_ORF3
	NODE_6007_length_2111_cov_1.180948_4	997346.HMPREF9374_0572	3.23e-15	74.3	COG0582@1|root,COG0582@2|Bacteria,1UXIE@1239|Firmicutes,4I6XQ@91061|Bacilli,27CYH@186824|Thermoactinomycetaceae	91061|Bacilli	L	Phage integrase family	-	-	-	-	-	-	-	-	-	-	-	-	Phage_integrase
	NODE_5990_length_2116_cov_0.713424_1	334545.CCMG01000015_gene1208	1.44e-214	615.0	COG1132@1|root,COG1132@2|Bacteria,1MUBM@1224|Proteobacteria,2TQMR@28211|Alphaproteobacteria,47ET5@766|Rickettsiales	766|Rickettsiales	V	COG1132 ABC-type multidrug transport system, ATPase and permease components	abcT3	-	-	ko:K06147,ko:K18893	ko02010,map02010	-	-	-	ko00000,ko00001,ko02000	3.A.1,3.A.1.106,3.A.1.109,3.A.1.21	-	-	ABC_membrane,ABC_tran
	NODE_5990_length_2116_cov_0.713424_2	357244.OTBS_0003	2.17e-10	61.6	COG3736@1|root,COG3736@2|Bacteria,1MXRC@1224|Proteobacteria,2U2AZ@28211|Alphaproteobacteria,47FGS@766|Rickettsiales	766|Rickettsiales	U	VirB8 protein	-	-	-	ko:K03203	ko03070,map03070	M00333	-	-	ko00000,ko00001,ko00002,ko02044	3.A.7	-	-	VirB8
	NODE_5980_length_2120_cov_1.156046_1	323261.Noc_2780	7.930000000000001e-179	510.0	COG0766@1|root,COG0766@2|Bacteria,1MUH7@1224|Proteobacteria,1RN91@1236|Gammaproteobacteria,1WXB6@135613|Chromatiales	135613|Chromatiales	M	Cell wall formation. Adds enolpyruvyl to UDP-N- acetylglucosamine	murA	-	2.5.1.7	ko:K00790	ko00520,ko00550,ko01100,map00520,map00550,map01100	-	R00660	RC00350	ko00000,ko00001,ko01000,ko01011	-	-	-	EPSP_synthase
	NODE_5980_length_2120_cov_1.156046_2	83406.HDN1F_06460	1.58e-94	285.0	COG0327@1|root,COG0327@2|Bacteria,1MVUN@1224|Proteobacteria,1RNBU@1236|Gammaproteobacteria,1J4NY@118884|unclassified Gammaproteobacteria	1236|Gammaproteobacteria	S	NIF3 (NGG1p interacting factor 3)	ybgI	GO:0003674,GO:0005488,GO:0005515,GO:0005575,GO:0005622,GO:0005623,GO:0005737,GO:0005829,GO:0008150,GO:0009314,GO:0009628,GO:0010212,GO:0042802,GO:0043167,GO:0043169,GO:0044424,GO:0044444,GO:0044464,GO:0046872,GO:0050896	-	-	-	-	-	-	-	-	-	-	NIF3
	NODE_5864_length_2169_cov_0.671401_1	1122604.JONR01000026_gene2952	7.74e-147	431.0	COG0527@1|root,COG0527@2|Bacteria,1MW3H@1224|Proteobacteria,1RN1G@1236|Gammaproteobacteria,1X4R3@135614|Xanthomonadales	135614|Xanthomonadales	E	homoserine dehydrogenase	thrA	-	1.1.1.3,2.7.2.4	ko:K12524	ko00260,ko00261,ko00270,ko00300,ko01100,ko01110,ko01120,ko01130,ko01230,map00260,map00261,map00270,map00300,map01100,map01110,map01120,map01130,map01230	M00016,M00017,M00018,M00526,M00527	R00480,R01773,R01775	RC00002,RC00043,RC00087	ko00000,ko00001,ko00002,ko01000	-	-	-	AA_kinase,ACT,ACT_7,Homoserine_dh,NAD_binding_3
	NODE_5864_length_2169_cov_0.671401_2	1056820.KB900699_gene1248	1.9999999999999998e-26	99.8	COG1551@1|root,COG1551@2|Bacteria,1N6PG@1224|Proteobacteria,1SCB4@1236|Gammaproteobacteria,2PNWZ@256005|Alteromonadales genera incertae sedis	1236|Gammaproteobacteria	T	Global regulator protein family	csrA	-	-	ko:K03563	ko02020,ko02025,ko02026,ko05111,map02020,map02025,map02026,map05111	-	-	-	ko00000,ko00001,ko03019	-	-	-	CsrA
	NODE_5862_length_2170_cov_1.054332_1	386456.JQKN01000004_gene125	8.580000000000001e-163	471.0	COG0367@1|root,arCOG00071@2157|Archaea,2XSYP@28890|Euryarchaeota,23NSW@183925|Methanobacteria	183925|Methanobacteria	E	TIGRFAM asparagine synthase (glutamine-hydrolyzing)	asnB	-	6.3.5.4	ko:K01953	ko00250,ko01100,ko01110,map00250,map01100,map01110	-	R00578	RC00010	ko00000,ko00001,ko01000,ko01002	-	-	-	Asn_synthase,GATase_7
	NODE_5862_length_2170_cov_1.054332_2	386456.JQKN01000004_gene126	5.83e-30	107.0	COG0721@1|root,arCOG02726@2157|Archaea,2Y0RR@28890|Euryarchaeota,23P81@183925|Methanobacteria	183925|Methanobacteria	J	TIGRFAM Asp-tRNA(Asn) Glu-tRNA(Gln) amidotransferase, subunit C	gatC	-	6.3.5.6,6.3.5.7	ko:K02435	ko00970,ko01100,map00970,map01100	-	R03905,R04212	RC00010	ko00000,ko00001,ko01000,ko03029	-	-	-	-
	NODE_5862_length_2170_cov_1.054332_3	386456.JQKN01000004_gene127	3.62e-79	239.0	COG2061@1|root,arCOG04396@2157|Archaea,2XWMD@28890|Euryarchaeota,23P6Q@183925|Methanobacteria	183925|Methanobacteria	E	allosteric regulator of homoserine dehydrogenase	-	-	-	-	-	-	-	-	-	-	-	-	-
	NODE_5862_length_2170_cov_1.054332_4	386456.JQKN01000004_gene128	3.07e-23	96.7	COG0460@1|root,arCOG01351@2157|Archaea,2XSWF@28890|Euryarchaeota,23NKT@183925|Methanobacteria	183925|Methanobacteria	E	homoserine dehydrogenase	hom	-	1.1.1.3	ko:K00003	ko00260,ko00270,ko00300,ko01100,ko01110,ko01120,ko01130,ko01230,map00260,map00270,map00300,map01100,map01110,map01120,map01130,map01230	M00017,M00018	R01773,R01775	RC00087	ko00000,ko00001,ko00002,ko01000	-	-	-	Homoserine_dh,NAD_binding_3
	NODE_5847_length_2176_cov_0.597365_1	589924.Ferp_0854	7.69e-92	289.0	COG0621@1|root,arCOG01358@2157|Archaea,2XSVB@28890|Euryarchaeota,2460N@183980|Archaeoglobi	183980|Archaeoglobi	J	MiaB-like tRNA modifying enzyme	-	-	2.8.4.5	ko:K15865	-	-	R10649	RC00003,RC03221	ko00000,ko01000,ko03016	-	-	-	Radical_SAM,TRAM,UPF0004
	NODE_5796_length_2195_cov_0.860735_1	386456.JQKN01000010_gene674	1.6999999999999998e-208	585.0	COG0303@1|root,arCOG00216@2157|Archaea,2XT05@28890|Euryarchaeota,23PDA@183925|Methanobacteria	183925|Methanobacteria	H	TIGRFAM molybdenum cofactor synthesis	moeA1	-	2.10.1.1	ko:K03750	ko00790,ko01100,map00790,map01100	-	R09735	RC03462	ko00000,ko00001,ko01000	-	-	-	MoCF_biosynth,MoeA_C,MoeA_N
	NODE_5796_length_2195_cov_0.860735_2	386456.JQKN01000010_gene673	2.57e-103	313.0	COG0750@1|root,arCOG04064@2157|Archaea,2XSZP@28890|Euryarchaeota,23NP1@183925|Methanobacteria	183925|Methanobacteria	M	Domain present in PSD-95, Dlg, and ZO-1/2.	-	-	-	-	-	-	-	-	-	-	-	-	PDZ_2,Peptidase_M50
	NODE_5778_length_2202_cov_0.898313_1	386456.JQKN01000008_gene1441	8.61e-64	206.0	COG1541@1|root,arCOG02620@2157|Archaea,2XU3A@28890|Euryarchaeota	28890|Euryarchaeota	H	coenzyme F390 synthetase	paaK	-	6.2.1.30	ko:K01912	ko00360,ko01120,ko05111,map00360,map01120,map05111	-	R02539	RC00004,RC00014	ko00000,ko00001,ko01000	-	-	-	AMP-binding,AMP-binding_C_2
	NODE_5778_length_2202_cov_0.898313_2	386456.JQKN01000008_gene1441	3.51e-15	74.7	COG1541@1|root,arCOG02620@2157|Archaea,2XU3A@28890|Euryarchaeota	28890|Euryarchaeota	H	coenzyme F390 synthetase	paaK	-	6.2.1.30	ko:K01912	ko00360,ko01120,ko05111,map00360,map01120,map05111	-	R02539	RC00004,RC00014	ko00000,ko00001,ko01000	-	-	-	AMP-binding,AMP-binding_C_2
	NODE_5778_length_2202_cov_0.898313_3	386456.JQKN01000008_gene1440	1.81e-72	221.0	COG4747@1|root,arCOG04444@2157|Archaea,2XXTI@28890|Euryarchaeota,23PPU@183925|Methanobacteria	183925|Methanobacteria	S	PFAM amino acid-binding ACT domain protein	-	-	-	-	-	-	-	-	-	-	-	-	-
	NODE_5778_length_2202_cov_0.898313_4	868131.MSWAN_1226	9.04e-07	57.4	arCOG01917@1|root,arCOG06115@1|root,arCOG07910@1|root,arCOG01917@2157|Archaea,arCOG06115@2157|Archaea,arCOG07910@2157|Archaea	2157|Archaea	S	Short C-terminal domain	-	-	1.17.4.1	ko:K00525,ko:K09940	ko00230,ko00240,ko01100,map00230,map00240,map01100	M00053	R02017,R02018,R02019,R02024	RC00613	ko00000,ko00001,ko00002,ko01000,ko03400	-	-	-	DZR,SHOCT,bPH_3,zinc_ribbon_2
	NODE_5778_length_2202_cov_0.898313_5	386456.JQKN01000008_gene1438	1.01e-64	204.0	COG0351@1|root,arCOG00020@2157|Archaea,2XSW8@28890|Euryarchaeota,23PCW@183925|Methanobacteria	183925|Methanobacteria	H	Phosphomethylpyrimidine kinase	thiD	-	2.7.1.49,2.7.4.7	ko:K00941	ko00730,ko01100,map00730,map01100	M00127	R03471,R04509	RC00002,RC00017	ko00000,ko00001,ko00002,ko01000	-	-	-	Phos_pyr_kin
	NODE_5736_length_2221_cov_0.969914_1	386456.JQKN01000014_gene3091	1.91e-06	49.3	COG2244@1|root,arCOG02209@2157|Archaea,2XVDT@28890|Euryarchaeota,23NPY@183925|Methanobacteria	183925|Methanobacteria	S	MviN-like protein	-	-	-	-	-	-	-	-	-	-	-	-	Polysacc_synt,Polysacc_synt_C
	NODE_5736_length_2221_cov_0.969914_2	386456.JQKN01000009_gene1192	4.14e-101	300.0	COG2005@1|root,COG3585@1|root,arCOG00223@2157|Archaea,arCOG00228@2157|Archaea	2157|Archaea	H	PFAM TOBE domain	modA	-	2.10.1.1,3.6.1.55	ko:K02019,ko:K03574,ko:K03750,ko:K07219	ko00790,ko01100,map00790,map01100	-	R09735	RC03462	ko00000,ko00001,ko01000,ko03000,ko03400	-	-	-	HTH_1,TOBE
	NODE_5736_length_2221_cov_0.969914_3	386456.JQKN01000014_gene3088	5.63e-115	332.0	COG0131@1|root,arCOG04398@2157|Archaea,2XT2K@28890|Euryarchaeota,23NY9@183925|Methanobacteria	183925|Methanobacteria	E	Imidazoleglycerol-phosphate dehydratase	hisB	-	4.2.1.19	ko:K01693	ko00340,ko01100,ko01110,ko01230,map00340,map01100,map01110,map01230	M00026	R03457	RC00932	ko00000,ko00001,ko00002,ko01000	-	-	-	IGPD
	NODE_5736_length_2221_cov_0.969914_5	386456.JQKN01000014_gene3091	0.000531	42.0	COG2244@1|root,arCOG02209@2157|Archaea,2XVDT@28890|Euryarchaeota,23NPY@183925|Methanobacteria	183925|Methanobacteria	S	MviN-like protein	-	-	-	-	-	-	-	-	-	-	-	-	Polysacc_synt,Polysacc_synt_C
	NODE_5611_length_2285_cov_0.537535_2	386456.JQKN01000007_gene3342	1.67e-182	511.0	arCOG09718@1|root,arCOG09718@2157|Archaea,2Y2AB@28890|Euryarchaeota,23PGM@183925|Methanobacteria	183925|Methanobacteria	-	-	-	-	-	-	-	-	-	-	-	-	-	-	-
	NODE_5611_length_2285_cov_0.537535_3	386456.JQKN01000007_gene3343	1.28e-83	254.0	COG1951@1|root,arCOG04407@2157|Archaea,2Y3C1@28890|Euryarchaeota,23PCX@183925|Methanobacteria	183925|Methanobacteria	C	Fumarate hydratase (Fumerase)	fumA2	-	4.2.1.2	ko:K01677	ko00020,ko00620,ko00720,ko01100,ko01110,ko01120,ko01130,ko01200,map00020,map00620,map00720,map01100,map01110,map01120,map01130,map01200	M00009,M00011,M00173,M00374,M00620	R01082	RC00443	ko00000,ko00001,ko00002,ko01000	-	-	-	Fumerase
	NODE_5611_length_2285_cov_0.537535_4	386456.JQKN01000007_gene3343	4.49e-61	194.0	COG1951@1|root,arCOG04407@2157|Archaea,2Y3C1@28890|Euryarchaeota,23PCX@183925|Methanobacteria	183925|Methanobacteria	C	Fumarate hydratase (Fumerase)	fumA2	-	4.2.1.2	ko:K01677	ko00020,ko00620,ko00720,ko01100,ko01110,ko01120,ko01130,ko01200,map00020,map00620,map00720,map01100,map01110,map01120,map01130,map01200	M00009,M00011,M00173,M00374,M00620	R01082	RC00443	ko00000,ko00001,ko00002,ko01000	-	-	-	Fumerase
	NODE_5611_length_2285_cov_0.537535_5	386456.JQKN01000007_gene3344	1.04e-51	170.0	COG0372@1|root,arCOG04237@2157|Archaea,2XT24@28890|Euryarchaeota,23PEN@183925|Methanobacteria	183925|Methanobacteria	C	PFAM Citrate	-	-	2.3.3.1	ko:K01647	ko00020,ko00630,ko01100,ko01110,ko01120,ko01130,ko01200,ko01210,ko01230,map00020,map00630,map01100,map01110,map01120,map01130,map01200,map01210,map01230	M00009,M00010,M00012,M00740	R00351	RC00004,RC00067	br01601,ko00000,ko00001,ko00002,ko01000	-	-	-	Citrate_synt
	NODE_5597_length_2291_cov_1.123383_2	497965.Cyan7822_4473	1.65e-11	67.8	COG0500@1|root,COG2226@2|Bacteria,1G4QP@1117|Cyanobacteria,3KI3J@43988|Cyanothece	1117|Cyanobacteria	Q	Putative S-adenosyl-L-methionine-dependent methyltransferase	-	-	-	-	-	-	-	-	-	-	-	-	Methyltransf_11,Methyltransf_25
	NODE_5597_length_2291_cov_1.123383_3	180332.JTGN01000009_gene4346	2.9e-05	55.1	COG1653@1|root,COG1653@2|Bacteria,1UNFN@1239|Firmicutes,24EYG@186801|Clostridia	186801|Clostridia	G	PFAM Bacterial extracellular solute-binding	-	-	-	ko:K02027,ko:K17244	ko02010,map02010	M00207,M00601	-	-	ko00000,ko00001,ko00002,ko02000	3.A.1.1,3.A.1.1.40	-	-	SBP_bac_1,SBP_bac_8
	NODE_5567_length_2304_cov_0.564538_1	386456.JQKN01000012_gene966	3.66e-53	172.0	arCOG06478@1|root,arCOG06478@2157|Archaea,2Y1B4@28890|Euryarchaeota,23P9B@183925|Methanobacteria	183925|Methanobacteria	S	Short repeat of unknown function (DUF308)	-	-	-	-	-	-	-	-	-	-	-	-	DUF308
	NODE_5567_length_2304_cov_0.564538_2	386456.JQKN01000012_gene967	3.43e-62	194.0	COG0393@1|root,arCOG02287@2157|Archaea,2XYRF@28890|Euryarchaeota,23PPY@183925|Methanobacteria	183925|Methanobacteria	S	Belongs to the UPF0145 family	-	-	-	-	-	-	-	-	-	-	-	-	YbjQ_1
	NODE_5567_length_2304_cov_0.564538_3	386456.JQKN01000012_gene968	2.25e-216	603.0	COG0012@1|root,arCOG00357@2157|Archaea,2XTZG@28890|Euryarchaeota,23NMZ@183925|Methanobacteria	183925|Methanobacteria	J	PFAM GTPase of	-	-	-	ko:K06942	-	-	-	-	ko00000,ko03009	-	-	-	MMR_HSR1,MMR_HSR1_C,TGS
	NODE_5563_length_2305_cov_0.437098_2	386456.JQKN01000008_gene1526	5.23e-114	330.0	COG4073@1|root,arCOG04894@2157|Archaea,2XXIZ@28890|Euryarchaeota,23PKZ@183925|Methanobacteria	183925|Methanobacteria	S	Uncharacterized protein conserved in archaea (DUF2119)	-	-	-	-	-	-	-	-	-	-	-	-	DUF2119
	NODE_5563_length_2305_cov_0.437098_3	386456.JQKN01000008_gene1527	1.85e-216	603.0	COG0499@1|root,arCOG04137@2157|Archaea,2XT4S@28890|Euryarchaeota,23PCS@183925|Methanobacteria	183925|Methanobacteria	H	May play a key role in the regulation of the intracellular concentration of adenosylhomocysteine	ahcY	-	3.3.1.1	ko:K01251	ko00270,ko01100,map00270,map01100	M00035	R00192,R04936	RC00056,RC00069,RC01161,RC01243	ko00000,ko00001,ko00002,ko01000,ko01009,ko04147	-	-	-	AdoHcyase,AdoHcyase_NAD
	NODE_5527_length_2320_cov_0.552668_1	386456.JQKN01000007_gene3344	1.18e-120	350.0	COG0372@1|root,arCOG04237@2157|Archaea,2XT24@28890|Euryarchaeota,23PEN@183925|Methanobacteria	183925|Methanobacteria	C	PFAM Citrate	-	-	2.3.3.1	ko:K01647	ko00020,ko00630,ko01100,ko01110,ko01120,ko01130,ko01200,ko01210,ko01230,map00020,map00630,map01100,map01110,map01120,map01130,map01200,map01210,map01230	M00009,M00010,M00012,M00740	R00351	RC00004,RC00067	br01601,ko00000,ko00001,ko00002,ko01000	-	-	-	Citrate_synt
	NODE_5527_length_2320_cov_0.552668_2	386456.JQKN01000007_gene3345	9.46e-13	66.2	COG2811@1|root,arCOG03363@2157|Archaea,2Y1ZV@28890|Euryarchaeota,23PTV@183925|Methanobacteria	183925|Methanobacteria	C	subunit H	ahaH	-	-	ko:K02107	ko00190,map00190	M00159	-	-	ko00000,ko00001,ko00002	3.A.2.2,3.A.2.3	-	-	-
	NODE_5527_length_2320_cov_0.552668_3	386456.JQKN01000007_gene3346	1.52e-199	573.0	COG1269@1|root,arCOG04138@2157|Archaea,2XTQP@28890|Euryarchaeota,23NV6@183925|Methanobacteria	183925|Methanobacteria	C	Belongs to the V-ATPase 116 kDa subunit family	ahaI	-	-	ko:K02123	ko00190,ko01100,map00190,map01100	M00159	-	-	ko00000,ko00001,ko00002	3.A.2.2,3.A.2.3	-	-	V_ATPase_I
	NODE_5521_length_2324_cov_0.753300_1	386456.JQKN01000008_gene1407	1.42e-16	75.9	arCOG06473@1|root,arCOG06473@2157|Archaea,2Y4Z3@28890|Euryarchaeota,23PQD@183925|Methanobacteria	183925|Methanobacteria	-	-	-	-	-	-	-	-	-	-	-	-	-	-	Class_IIIsignal
	NODE_5521_length_2324_cov_0.753300_2	386456.JQKN01000008_gene1406	3.38e-50	164.0	arCOG03821@1|root,arCOG03821@2157|Archaea,2Y5R7@28890|Euryarchaeota,23PTX@183925|Methanobacteria	183925|Methanobacteria	-	-	-	-	-	-	-	-	-	-	-	-	-	-	-
	NODE_5521_length_2324_cov_0.753300_3	386456.JQKN01000008_gene1405	2e-87	263.0	COG1818@1|root,arCOG00084@2157|Archaea,2Y1NS@28890|Euryarchaeota	28890|Euryarchaeota	S	THUMP	-	-	-	ko:K06963	-	-	-	-	ko00000,ko03016	-	-	-	THUMP
	NODE_5521_length_2324_cov_0.753300_4	386456.JQKN01000008_gene1404	6.87e-57	183.0	COG4052@1|root,arCOG03226@2157|Archaea	2157|Archaea	S	methanogenesis marker protein 7	-	-	-	-	-	-	-	-	-	-	-	-	MCR_C
	NODE_5521_length_2324_cov_0.753300_5	386456.JQKN01000008_gene1403	2.29e-21	85.5	arCOG02718@1|root,arCOG02718@2157|Archaea	2157|Archaea	S	TIGRFAM TIGR00304 family protein	-	-	-	-	-	-	-	-	-	-	-	-	DUF131
	NODE_5493_length_2338_cov_1.142469_1	386456.JQKN01000004_gene168	1.74e-53	178.0	COG3359@1|root,arCOG03130@2157|Archaea,2Y790@28890|Euryarchaeota,23PGT@183925|Methanobacteria	183925|Methanobacteria	L	RNase_H superfamily	-	-	-	ko:K07502	-	-	-	-	ko00000	-	-	-	RNase_H_2
	NODE_5493_length_2338_cov_1.142469_2	386456.JQKN01000004_gene207	4.62e-144	411.0	COG0455@1|root,arCOG00589@2157|Archaea,2XT20@28890|Euryarchaeota	28890|Euryarchaeota	D	Belongs to the ParA family	parA1	-	-	ko:K03609	-	-	-	-	ko00000,ko03036,ko04812	-	-	-	AAA_31,CbiA,ParA
	NODE_5493_length_2338_cov_1.142469_3	386456.JQKN01000004_gene206	5.999999999999999e-76	229.0	COG1513@1|root,arCOG01488@2157|Archaea,2XXG9@28890|Euryarchaeota	28890|Euryarchaeota	F	PFAM CMP dCMP deaminase zinc-binding	codA	-	3.5.4.1	ko:K01485	ko00240,ko00330,ko01100,map00240,map00330,map01100	-	R00974,R01411,R02922	RC00074,RC00514,RC00809	ko00000,ko00001,ko01000	-	-	-	dCMP_cyt_deam_1
	NODE_5376_length_2397_cov_1.003965_1	1094980.Mpsy_2552	1.11e-86	274.0	COG1970@1|root,arCOG01959@2157|Archaea,2XV1N@28890|Euryarchaeota,2NBGS@224756|Methanomicrobia	224756|Methanomicrobia	P	cellular potassium ion transport	-	-	-	ko:K03499	-	-	-	-	ko00000,ko02000	2.A.38.1,2.A.38.4	-	-	TrkA_C,TrkA_N
	NODE_5376_length_2397_cov_1.003965_2	667014.Thein_1046	2.13e-51	171.0	COG1573@1|root,COG1573@2|Bacteria,2GH9D@200940|Thermodesulfobacteria	200940|Thermodesulfobacteria	L	Uracil DNA glycosylase superfamily	-	-	3.2.2.27	ko:K21929	ko03410,map03410	-	-	-	ko00000,ko00001,ko01000,ko03400	-	-	-	UDG
	NODE_5332_length_2416_cov_1.593709_1	386456.JQKN01000002_gene2833	1.44e-110	323.0	COG1926@1|root,arCOG00041@2157|Archaea,2XWHP@28890|Euryarchaeota	28890|Euryarchaeota	F	phosphoribosyltransferases	prt	-	-	-	-	-	-	-	-	-	-	-	Pribosyltran
	NODE_5332_length_2416_cov_1.593709_2	868131.MSWAN_1582	3.0999999999999995e-43	144.0	arCOG13995@1|root,arCOG13995@2157|Archaea	2157|Archaea	-	-	-	-	-	-	-	-	-	-	-	-	-	-	-
	NODE_5332_length_2416_cov_1.593709_3	386456.JQKN01000002_gene2834	8.46e-56	178.0	arCOG03459@1|root,arCOG03459@2157|Archaea	2157|Archaea	-	-	-	-	-	-	-	-	-	-	-	-	-	-	-
	NODE_5332_length_2416_cov_1.593709_4	1220534.B655_1829	6.25e-22	90.9	COG0170@1|root,arCOG01880@2157|Archaea,2XY6G@28890|Euryarchaeota,23PK0@183925|Methanobacteria	183925|Methanobacteria	I	PFAM phosphatidate cytidylyltransferase	-	-	-	-	-	-	-	-	-	-	-	-	-
	NODE_5284_length_2437_cov_0.926840_1	386456.JQKN01000004_gene138	2.33e-08	55.1	arCOG10451@1|root,arCOG10451@2157|Archaea	2157|Archaea	-	-	-	-	-	-	-	-	-	-	-	-	-	-	-
	NODE_5284_length_2437_cov_0.926840_3	386456.JQKN01000004_gene139	2e-99	298.0	arCOG07604@1|root,arCOG07604@2157|Archaea,2XZUF@28890|Euryarchaeota,23P7U@183925|Methanobacteria	183925|Methanobacteria	-	-	-	-	-	-	-	-	-	-	-	-	-	-	-
	NODE_5284_length_2437_cov_0.926840_4	386456.JQKN01000004_gene140	5.04e-123	355.0	COG2102@1|root,arCOG00035@2157|Archaea,2XTNJ@28890|Euryarchaeota,23NZ0@183925|Methanobacteria	183925|Methanobacteria	S	metal-binding-domain 4Fe-4S-binding-domain containing ABC transporter	-	-	6.3.1.14	ko:K06927	-	-	R03613	RC00358	ko00000,ko01000,ko03012	-	-	-	Diphthami_syn_2
	NODE_5284_length_2437_cov_0.926840_5	386456.JQKN01000004_gene141	2.04e-30	110.0	COG1931@1|root,arCOG01043@2157|Archaea	2157|Archaea	H	Belongs to the UPF0201 family	-	-	-	ko:K09736	-	-	-	-	ko00000	-	-	-	RNA_binding
	NODE_5064_length_2554_cov_1.880099_1	1196095.GAPWK_1602	2.39e-212	677.0	COG1020@1|root,COG1020@2|Bacteria,1QK4F@1224|Proteobacteria,1RPAG@1236|Gammaproteobacteria	1236|Gammaproteobacteria	Q	COG1020 Non-ribosomal peptide synthetase modules and related proteins	-	-	-	-	-	-	-	-	-	-	-	-	AMP-binding,AMP-binding_C,Condensation,PP-binding,Thioesterase
	NODE_4948_length_2622_cov_0.742285_1	386456.JQKN01000001_gene2345	5.1699999999999995e-256	709.0	COG0252@1|root,arCOG01924@2157|Archaea,2XTN1@28890|Euryarchaeota,23NMW@183925|Methanobacteria	183925|Methanobacteria	J	Allows the formation of correctly charged Gln-tRNA(Gln) through the transamidation of misacylated Glu-tRNA(Gln) in organisms which lack glutaminyl-tRNA synthetase. The reaction takes place in the presence of glutamine and ATP through an activated gamma-phospho-Glu-tRNA(Gln). The GatDE system is specific for glutamate and does not act on aspartate	gatD	-	6.3.5.7	ko:K09482	ko00970,ko01100,map00970,map01100	-	R03905	RC00010	ko00000,ko00001,ko01000	-	-	-	Asparaginase
	NODE_4948_length_2622_cov_0.742285_2	386456.JQKN01000001_gene2344	2.2700000000000003e-235	662.0	COG2511@1|root,arCOG01719@2157|Archaea,2XT73@28890|Euryarchaeota,23NQ4@183925|Methanobacteria	183925|Methanobacteria	J	Allows the formation of correctly charged Gln-tRNA(Gln) through the transamidation of misacylated Glu-tRNA(Gln) in organisms which lack glutaminyl-tRNA synthetase. The reaction takes place in the presence of glutamine and ATP through an activated gamma-phospho-Glu-tRNA(Gln). The GatDE system is specific for glutamate and does not act on aspartate	gatE	-	6.3.5.7	ko:K03330	ko00970,ko01100,map00970,map01100	-	R03905	RC00010	ko00000,ko00001,ko01000	-	-	-	GAD,GatB_N,GatB_Yqey
	NODE_4877_length_2669_cov_0.830055_1	338963.Pcar_1977	3.35e-55	181.0	COG0428@1|root,COG0428@2|Bacteria,1MWEZ@1224|Proteobacteria,42NT2@68525|delta/epsilon subdivisions,2WJM5@28221|Deltaproteobacteria,43SQR@69541|Desulfuromonadales	28221|Deltaproteobacteria	P	ZIP Zinc transporter	gufA	-	-	ko:K07238	-	-	-	-	ko00000,ko02000	2.A.5.5	-	-	Zip
	NODE_4877_length_2669_cov_0.830055_2	406327.Mevan_0209	8.470000000000001e-110	318.0	COG2406@1|root,arCOG01093@2157|Archaea,2XV6V@28890|Euryarchaeota,23RDT@183939|Methanococci	183939|Methanococci	S	PFAM Ferritin, Dps family protein	-	-	-	-	-	-	-	-	-	-	-	-	Ferritin
	NODE_4877_length_2669_cov_0.830055_3	868131.MSWAN_1201	1.26e-78	236.0	arCOG14007@1|root,arCOG14007@2157|Archaea	2157|Archaea	-	-	-	-	-	-	-	-	-	-	-	-	-	-	-
	NODE_4877_length_2669_cov_0.830055_5	386456.JQKN01000008_gene1606	3.29e-45	148.0	COG1581@1|root,arCOG01753@2157|Archaea,2XZH4@28890|Euryarchaeota,23PPK@183925|Methanobacteria	183925|Methanobacteria	K	Binds double-stranded DNA tightly but without sequence specificity. It is distributed uniformly and abundantly on the chromosome, suggesting a role in chromatin architecture. However, it does not significantly compact DNA. Binds rRNA and mRNA in vivo. May play a role in maintaining the structural and functional stability of RNA, and, perhaps, ribosomes	-	-	-	ko:K03622	-	-	-	-	ko00000	-	-	-	Alba
	NODE_4871_length_2674_cov_0.967413_1	386456.JQKN01000012_gene1063	2.73e-66	203.0	COG1513@1|root,arCOG01488@2157|Archaea,2XXZW@28890|Euryarchaeota	28890|Euryarchaeota	F	PFAM CMP dCMP deaminase zinc-binding	-	-	3.5.4.1	ko:K01485	ko00240,ko00330,ko01100,map00240,map00330,map01100	-	R00974,R01411,R02922	RC00074,RC00514,RC00809	ko00000,ko00001,ko01000	-	-	-	dCMP_cyt_deam_1
	NODE_4871_length_2674_cov_0.967413_2	386456.JQKN01000012_gene1062	3.38e-58	185.0	COG0454@1|root,arCOG00844@2157|Archaea	2157|Archaea	K	COG0454 Histone acetyltransferase HPA2 and related acetyltransferases	-	-	-	-	-	-	-	-	-	-	-	-	Acetyltransf_1
	NODE_4871_length_2674_cov_0.967413_3	386456.JQKN01000012_gene1055	1.9600000000000002e-85	258.0	COG0454@1|root,arCOG00826@2157|Archaea,2Y88B@28890|Euryarchaeota,23PQW@183925|Methanobacteria	183925|Methanobacteria	K	PFAM GCN5-related N-acetyltransferase	-	-	-	-	-	-	-	-	-	-	-	-	Acetyltransf_1
	NODE_4871_length_2674_cov_0.967413_4	386456.JQKN01000017_gene850	1.52e-44	146.0	arCOG03597@1|root,arCOG03597@2157|Archaea,2Y60H@28890|Euryarchaeota	28890|Euryarchaeota	S	Protein of unknown function (DUF2769)	-	-	-	-	-	-	-	-	-	-	-	-	DUF2769
	NODE_4871_length_2674_cov_0.967413_5	386456.JQKN01000017_gene850	3.1699999999999997e-38	130.0	arCOG03597@1|root,arCOG03597@2157|Archaea,2Y60H@28890|Euryarchaeota	28890|Euryarchaeota	S	Protein of unknown function (DUF2769)	-	-	-	-	-	-	-	-	-	-	-	-	DUF2769
	NODE_4856_length_2684_cov_1.439578_1	386456.JQKN01000001_gene2178	7.54e-31	115.0	COG0648@1|root,arCOG01894@2157|Archaea,2XU62@28890|Euryarchaeota,23PF5@183925|Methanobacteria	183925|Methanobacteria	G	TIM barrel	-	-	3.1.21.2	ko:K01151	ko03410,map03410	-	-	-	ko00000,ko00001,ko01000,ko03400	-	-	-	AP_endonuc_2
	NODE_4856_length_2684_cov_1.439578_2	386456.JQKN01000001_gene2178	2.21e-32	120.0	COG0648@1|root,arCOG01894@2157|Archaea,2XU62@28890|Euryarchaeota,23PF5@183925|Methanobacteria	183925|Methanobacteria	G	TIM barrel	-	-	3.1.21.2	ko:K01151	ko03410,map03410	-	-	-	ko00000,ko00001,ko01000,ko03400	-	-	-	AP_endonuc_2
	NODE_4856_length_2684_cov_1.439578_3	386456.JQKN01000001_gene2178	3.85e-33	121.0	COG0648@1|root,arCOG01894@2157|Archaea,2XU62@28890|Euryarchaeota,23PF5@183925|Methanobacteria	183925|Methanobacteria	G	TIM barrel	-	-	3.1.21.2	ko:K01151	ko03410,map03410	-	-	-	ko00000,ko00001,ko01000,ko03400	-	-	-	AP_endonuc_2
	NODE_4856_length_2684_cov_1.439578_4	386456.JQKN01000001_gene2177	2.21e-127	369.0	COG1533@1|root,arCOG01290@2157|Archaea,2XTYE@28890|Euryarchaeota,23PJ5@183925|Methanobacteria	183925|Methanobacteria	L	Elongator protein 3, MiaB family, Radical SAM	-	-	-	-	-	-	-	-	-	-	-	-	Radical_SAM
	NODE_4856_length_2684_cov_1.439578_5	1218173.BALCAV_0201580	6.38e-22	90.5	COG5649@1|root,COG5649@2|Bacteria,1VF35@1239|Firmicutes,4HQN0@91061|Bacilli,1ZIJ5@1386|Bacillus	91061|Bacilli	S	Domain of unknown function (DU1801)	-	-	-	-	-	-	-	-	-	-	-	-	DUF1801
	NODE_4856_length_2684_cov_1.439578_6	1220534.B655_0717	2.15e-15	74.7	COG1413@1|root,arCOG02966@2157|Archaea	2157|Archaea	C	PBS lyase HEAT domain protein repeat-containing protein	-	-	3.6.4.12	ko:K10844	ko03022,ko03420,map03022,map03420	M00290	-	-	ko00000,ko00001,ko00002,ko01000,ko03021,ko03400	-	-	-	Cnd1,HEAT_2
	NODE_4797_length_2719_cov_0.913194_1	386456.JQKN01000010_gene716	4.669999999999999e-68	216.0	COG0041@1|root,arCOG02464@2157|Archaea,2XU0P@28890|Euryarchaeota,23NNV@183925|Methanobacteria	183925|Methanobacteria	F	Catalyzes the conversion of N5-carboxyaminoimidazole ribonucleotide (N5-CAIR) to 4-carboxy-5-aminoimidazole ribonucleotide (CAIR)	purE	-	5.4.99.18	ko:K01588	ko00230,ko01100,ko01110,ko01130,map00230,map01100,map01110,map01130	M00048	R07405	RC01947	ko00000,ko00001,ko00002,ko01000	-	-	-	AIRC
	NODE_4797_length_2719_cov_0.913194_2	386456.JQKN01000010_gene716	5e-08	53.5	COG0041@1|root,arCOG02464@2157|Archaea,2XU0P@28890|Euryarchaeota,23NNV@183925|Methanobacteria	183925|Methanobacteria	F	Catalyzes the conversion of N5-carboxyaminoimidazole ribonucleotide (N5-CAIR) to 4-carboxy-5-aminoimidazole ribonucleotide (CAIR)	purE	-	5.4.99.18	ko:K01588	ko00230,ko01100,ko01110,ko01130,map00230,map01100,map01110,map01130	M00048	R07405	RC01947	ko00000,ko00001,ko00002,ko01000	-	-	-	AIRC
	NODE_4797_length_2719_cov_0.913194_3	386456.JQKN01000010_gene715	5.52e-238	674.0	COG0463@1|root,arCOG00894@2157|Archaea,2XVMR@28890|Euryarchaeota,23NJF@183925|Methanobacteria	183925|Methanobacteria	M	PFAM Glycosyl transferase family 2	-	-	-	-	-	-	-	-	-	-	-	-	Glycos_transf_2
	NODE_4797_length_2719_cov_0.913194_4	1220534.B655_2040	1.0200000000000001e-35	125.0	COG1571@1|root,arCOG01116@2157|Archaea,2XTUY@28890|Euryarchaeota,23NTV@183925|Methanobacteria	183925|Methanobacteria	S	marker protein 11	-	-	-	-	-	-	-	-	-	-	-	-	DUF1743
	NODE_4653_length_2831_cov_1.034763_1	386456.JQKN01000002_gene2694	2.35e-55	181.0	COG0657@1|root,arCOG02638@2157|Archaea,2XTFN@28890|Euryarchaeota,23PUS@183925|Methanobacteria	183925|Methanobacteria	I	alpha/beta hydrolase fold	-	-	-	-	-	-	-	-	-	-	-	-	Abhydrolase_3
	NODE_4653_length_2831_cov_1.034763_2	386456.JQKN01000002_gene2692	5.97e-249	687.0	COG1602@1|root,arCOG04269@2157|Archaea,2XTEQ@28890|Euryarchaeota,23NMK@183925|Methanobacteria	183925|Methanobacteria	S	Archaeal Nre, N-terminal	-	-	-	-	-	-	-	-	-	-	-	-	Nre_C,Nre_N
	NODE_4653_length_2831_cov_1.034763_3	1047013.AQSP01000131_gene1807	1.3399999999999998e-34	126.0	COG2020@1|root,COG2020@2|Bacteria	2|Bacteria	O	methyltransferase activity	-	-	-	-	-	-	-	-	-	-	-	-	DUF1295,PEMT
	NODE_4653_length_2831_cov_1.034763_4	386456.JQKN01000002_gene2686	1.0699999999999999e-60	197.0	arCOG00116@1|root,arCOG00116@2157|Archaea,2XVDZ@28890|Euryarchaeota,23P3A@183925|Methanobacteria	183925|Methanobacteria	S	Belongs to the DegT DnrJ EryC1 family	-	-	-	-	-	-	-	-	-	-	-	-	DegT_DnrJ_EryC1
	NODE_4635_length_2843_cov_0.886230_1	386456.JQKN01000014_gene3118	1.42e-87	265.0	COG3527@1|root,arCOG03340@2157|Archaea,2XUAU@28890|Euryarchaeota	28890|Euryarchaeota	Q	PFAM Alpha-acetolactate decarboxylase	-	-	4.1.1.5	ko:K01575	ko00650,ko00660,map00650,map00660	-	R02948	RC00812	ko00000,ko00001,ko01000	-	-	-	AAL_decarboxy
	NODE_4635_length_2843_cov_0.886230_2	386456.JQKN01000014_gene3117	1.5399999999999999e-69	217.0	COG3548@1|root,arCOG04887@2157|Archaea,2XUMU@28890|Euryarchaeota,23PS6@183925|Methanobacteria	183925|Methanobacteria	S	Protein of unknown function (DUF1211)	-	-	-	-	-	-	-	-	-	-	-	-	DUF1211
	NODE_4635_length_2843_cov_0.886230_3	386456.JQKN01000014_gene3116	2.77e-93	282.0	COG2768@1|root,arCOG02448@2157|Archaea,2XW30@28890|Euryarchaeota,23PAX@183925|Methanobacteria	183925|Methanobacteria	C	Domain of unknown function (DUF362)	-	-	-	ko:K07138	-	-	-	-	ko00000	-	-	-	DUF362,Fer4
	NODE_4635_length_2843_cov_0.886230_4	386456.JQKN01000014_gene3116	3.99e-46	158.0	COG2768@1|root,arCOG02448@2157|Archaea,2XW30@28890|Euryarchaeota,23PAX@183925|Methanobacteria	183925|Methanobacteria	C	Domain of unknown function (DUF362)	-	-	-	ko:K07138	-	-	-	-	ko00000	-	-	-	DUF362,Fer4
	NODE_4552_length_2911_cov_1.448635_1	1220534.B655_1829	1.17e-70	218.0	COG0170@1|root,arCOG01880@2157|Archaea,2XY6G@28890|Euryarchaeota,23PK0@183925|Methanobacteria	183925|Methanobacteria	I	PFAM phosphatidate cytidylyltransferase	-	-	-	-	-	-	-	-	-	-	-	-	-
	NODE_4552_length_2911_cov_1.448635_2	868131.MSWAN_0533	1.1700000000000001e-29	116.0	COG3548@1|root,arCOG04887@2157|Archaea	2157|Archaea	S	integral membrane protein	-	-	-	-	-	-	-	-	-	-	-	-	DUF1211
	NODE_4552_length_2911_cov_1.448635_3	1220534.B655_1828	1.83e-84	254.0	COG0125@1|root,arCOG01893@2157|Archaea,2XZ7Z@28890|Euryarchaeota,23PMA@183925|Methanobacteria	183925|Methanobacteria	F	thymidylate kinase	-	-	2.7.4.9	ko:K00943	ko00240,ko01100,map00240,map01100	M00053	R02094,R02098	RC00002	ko00000,ko00001,ko00002,ko01000	-	-	-	Thymidylate_kin
	NODE_4552_length_2911_cov_1.448635_5	386456.JQKN01000002_gene2838	1.38e-136	395.0	COG0697@1|root,arCOG00273@2157|Archaea,2XX1A@28890|Euryarchaeota	28890|Euryarchaeota	G	EamA-like transporter family	-	-	-	-	-	-	-	-	-	-	-	-	EamA
	NODE_4509_length_2946_cov_0.944661_1	386456.JQKN01000001_gene1705	1.0700000000000001e-163	462.0	COG4022@1|root,arCOG04893@2157|Archaea,2XVN1@28890|Euryarchaeota,23PAA@183925|Methanobacteria	183925|Methanobacteria	S	Uncharacterized protein conserved in archaea (DUF2099)	-	-	-	-	-	-	-	-	-	-	-	-	DUF2099
	NODE_4509_length_2946_cov_0.944661_2	386456.JQKN01000001_gene2346	2.74e-68	208.0	COG0517@1|root,arCOG00606@2157|Archaea	2157|Archaea	I	CBS domain	-	-	-	-	-	-	-	-	-	-	-	-	CBS
	NODE_4509_length_2946_cov_0.944661_3	386456.JQKN01000001_gene2347	2.64e-245	679.0	COG0422@1|root,arCOG02741@2157|Archaea,2XTMD@28890|Euryarchaeota,23NTD@183925|Methanobacteria	183925|Methanobacteria	H	Catalyzes the synthesis of the hydroxymethylpyrimidine phosphate (HMP-P) moiety of thiamine from aminoimidazole ribotide (AIR) in a radical S-adenosyl-L-methionine (SAM)-dependent reaction	thiC	-	4.1.99.17	ko:K03147	ko00730,ko01100,map00730,map01100	M00127	R03472	RC03251,RC03252	ko00000,ko00001,ko00002,ko01000	-	-	-	ThiC_Rad_SAM
	NODE_4407_length_3028_cov_0.950707_1	386456.JQKN01000001_gene1781	1.3e-81	247.0	COG0009@1|root,arCOG01952@2157|Archaea,2XVGC@28890|Euryarchaeota,23P1X@183925|Methanobacteria	183925|Methanobacteria	J	Sua5 YciO YrdC YwlC	-	-	2.7.7.87	ko:K07566	-	-	R10463	RC00745	ko00000,ko01000,ko03009,ko03016	-	-	-	Sua5_yciO_yrdC
	NODE_4407_length_3028_cov_0.950707_2	386456.JQKN01000001_gene1784	4.43e-124	358.0	COG0468@1|root,arCOG00417@2157|Archaea,2XTI2@28890|Euryarchaeota,23NZU@183925|Methanobacteria	183925|Methanobacteria	L	Involved in DNA repair and in homologous recombination. May regulate the cleavage reactions of the branch-structured DNA. Has a very weak ATPase activity that is not stimulated by DNA. Binds DNA but does not promote DNA strands exchange	radB	-	-	ko:K04484	-	-	-	-	ko00000,ko03400	-	-	-	Rad51
	NODE_4407_length_3028_cov_0.950707_3	386456.JQKN01000001_gene1786	3.24e-240	664.0	COG0436@1|root,arCOG04897@2157|Archaea,2XURI@28890|Euryarchaeota,23NXC@183925|Methanobacteria	183925|Methanobacteria	E	PFAM Aminotransferase, class I	-	-	-	-	-	-	-	-	-	-	-	-	Aminotran_1_2
	NODE_4407_length_3028_cov_0.950707_4	386456.JQKN01000001_gene1791	2.28e-12	65.9	COG1245@1|root,arCOG00187@2157|Archaea,2XSZE@28890|Euryarchaeota,23NKN@183925|Methanobacteria	183925|Methanobacteria	E	RNase L inhibitor	-	-	-	ko:K06174	-	-	-	-	ko00000,ko03009	-	-	-	ABC_tran,Fer4,RLI
	NODE_4395_length_3035_cov_0.697387_1	386456.JQKN01000002_gene2480	5.02e-56	181.0	COG1235@1|root,arCOG00499@2157|Archaea,2XT48@28890|Euryarchaeota,23NXG@183925|Methanobacteria	183925|Methanobacteria	S	Beta-lactamase superfamily domain	-	-	-	-	-	-	-	-	-	-	-	-	Lactamase_B_2
	NODE_4395_length_3035_cov_0.697387_2	386456.JQKN01000002_gene2481	6.73e-149	427.0	COG4079@1|root,arCOG03213@2157|Archaea,2XW0G@28890|Euryarchaeota,23PI1@183925|Methanobacteria	183925|Methanobacteria	S	Uncharacterized protein conserved in archaea (DUF2121)	-	-	-	-	-	-	-	-	-	-	-	-	DUF2121
	NODE_4395_length_3035_cov_0.697387_3	386456.JQKN01000002_gene2482	4.27e-237	671.0	COG1331@1|root,arCOG02007@2157|Archaea,2XU5Q@28890|Euryarchaeota	28890|Euryarchaeota	O	COG1331 Highly conserved protein containing a thioredoxin domain	-	-	-	ko:K06888	-	-	-	-	ko00000	-	-	-	GlcNAc_2-epim,Thioredox_DsbH
	NODE_4297_length_3122_cov_1.131886_1	386456.JQKN01000002_gene2664	8.23e-164	469.0	arCOG06687@1|root,arCOG06687@2157|Archaea,2XVCV@28890|Euryarchaeota,23NSD@183925|Methanobacteria	183925|Methanobacteria	-	-	-	-	-	-	-	-	-	-	-	-	-	-	-
	NODE_4297_length_3122_cov_1.131886_2	386456.JQKN01000001_gene1928	8.09e-85	254.0	COG0461@1|root,arCOG00029@2157|Archaea,2XVNG@28890|Euryarchaeota,23P1H@183925|Methanobacteria	183925|Methanobacteria	F	Catalyzes the transfer of a ribosyl phosphate group from 5-phosphoribose 1-diphosphate to orotate, leading to the formation of orotidine monophosphate (OMP)	pyrE	-	2.4.2.10	ko:K00762	ko00240,ko01100,map00240,map01100	M00051	R01870	RC00611	ko00000,ko00001,ko00002,ko01000	-	-	-	Pribosyltran
	NODE_4232_length_3184_cov_0.807982_1	386456.JQKN01000009_gene1119	4.2e-128	371.0	COG0524@1|root,arCOG00014@2157|Archaea,2XU7Z@28890|Euryarchaeota,23NQZ@183925|Methanobacteria	183925|Methanobacteria	G	Belongs to the carbohydrate kinase PfkB family	-	-	2.7.1.213,2.7.1.73	ko:K22026	ko00230,ko00240,map00230,map00240	-	R00513,R01131,R01228	RC00002,RC00017	ko00000,ko00001,ko01000	-	-	-	PfkB
	NODE_4232_length_3184_cov_0.807982_2	386456.JQKN01000009_gene1122	3.91e-05	46.2	COG0583@1|root,arCOG00225@2157|Archaea,2XYM3@28890|Euryarchaeota,23P3T@183925|Methanobacteria	183925|Methanobacteria	K	Bacterial regulatory helix-turn-helix protein, lysR family	-	-	-	-	-	-	-	-	-	-	-	-	HTH_1
	NODE_4232_length_3184_cov_0.807982_5	386456.JQKN01000009_gene1122	4.23e-102	304.0	COG0583@1|root,arCOG00225@2157|Archaea,2XYM3@28890|Euryarchaeota,23P3T@183925|Methanobacteria	183925|Methanobacteria	K	Bacterial regulatory helix-turn-helix protein, lysR family	-	-	-	-	-	-	-	-	-	-	-	-	HTH_1
	NODE_4216_length_3195_cov_0.583442_1	386456.JQKN01000010_gene678	1.4999999999999998e-147	421.0	COG1131@1|root,arCOG00196@2157|Archaea,2Y7W4@28890|Euryarchaeota	28890|Euryarchaeota	V	ABC-type multidrug transport system ATPase component	-	-	-	ko:K01990	-	M00254	-	-	ko00000,ko00002,ko02000	3.A.1	-	-	ABC_tran,DUF4162
	NODE_4216_length_3195_cov_0.583442_2	386456.JQKN01000010_gene677	2.51e-95	280.0	COG0225@1|root,arCOG02816@2157|Archaea,2XWKA@28890|Euryarchaeota,23P6F@183925|Methanobacteria	183925|Methanobacteria	O	Has an important function as a repair enzyme for proteins that have been inactivated by oxidation. Catalyzes the reversible oxidation-reduction of methionine sulfoxide in proteins to methionine	msrA	-	1.8.4.11	ko:K07304	-	-	-	-	ko00000,ko01000	-	-	-	PMSR
	NODE_4216_length_3195_cov_0.583442_3	386456.JQKN01000010_gene676	5.87e-53	170.0	arCOG06471@1|root,arCOG06471@2157|Archaea,2Y0HU@28890|Euryarchaeota,23P6U@183925|Methanobacteria	183925|Methanobacteria	S	MTH538 TIR-like domain (DUF1863)	-	-	-	-	-	-	-	-	-	-	-	-	-
	NODE_4216_length_3195_cov_0.583442_4	386456.JQKN01000001_gene2258	1.35e-44	154.0	COG3409@1|root,arCOG05171@2157|Archaea	2157|Archaea	M	Peptidoglycan-binding domain 1 protein	-	-	-	-	-	-	-	-	-	-	-	-	PG_binding_1
	NODE_4199_length_3214_cov_0.856495_2	868131.MSWAN_0337	2.18e-32	117.0	arCOG11303@1|root,arCOG11303@2157|Archaea	2157|Archaea	-	-	-	-	-	-	-	-	-	-	-	-	-	-	-
	NODE_4199_length_3214_cov_0.856495_3	386456.JQKN01000014_gene3095	4.9900000000000006e-259	714.0	COG0269@1|root,arCOG00103@2157|Archaea,2XUYW@28890|Euryarchaeota,23NJH@183925|Methanobacteria	183925|Methanobacteria	G	Catalyzes the condensation of formaldehyde with tetrahydromethanopterin (H(4)MPT) to 5,10- methylenetetrahydromethanopterin	fae-hps	-	4.1.2.43,4.2.1.147	ko:K13812	ko00030,ko00680,ko01100,ko01120,ko01200,ko01230,map00030,map00680,map01100,map01120,map01200,map01230	M00345,M00580	R05338,R08058	RC00421,RC00422,RC01583,RC01795	ko00000,ko00001,ko00002,ko01000	-	-	-	Fae,OMPdecase
	NODE_3998_length_3384_cov_0.809948_2	1220534.B655_0361	3.14e-94	328.0	arCOG07611@1|root,arCOG07611@2157|Archaea,2Y6AM@28890|Euryarchaeota,23PGQ@183925|Methanobacteria	183925|Methanobacteria	M	Domain of unknown function DUF11	-	-	-	-	-	-	-	-	-	-	-	-	DUF11
	NODE_3998_length_3384_cov_0.809948_3	868131.MSWAN_1024	8.9e-59	197.0	COG0367@1|root,arCOG00071@2157|Archaea,2XSYP@28890|Euryarchaeota,23NSW@183925|Methanobacteria	183925|Methanobacteria	E	TIGRFAM asparagine synthase (glutamine-hydrolyzing)	asnB	-	6.3.5.4	ko:K01953	ko00250,ko01100,ko01110,map00250,map01100,map01110	-	R00578	RC00010	ko00000,ko00001,ko01000,ko01002	-	-	-	Asn_synthase,GATase_7
	NODE_3793_length_3607_cov_0.854023_1	1220534.B655_0672	3.4499999999999996e-30	114.0	arCOG01788@1|root,arCOG01788@2157|Archaea	2157|Archaea	S	PFAM methyltransferase	-	-	-	-	-	-	-	-	-	-	-	-	Methyltransf_25
	NODE_3793_length_3607_cov_0.854023_2	386456.JQKN01000013_gene2983	0.000225	43.5	COG0454@1|root,arCOG00845@2157|Archaea,2Y5I2@28890|Euryarchaeota	28890|Euryarchaeota	K	Acetyltransferase (GNAT) family	-	-	-	-	-	-	-	-	-	-	-	-	-
	NODE_3793_length_3607_cov_0.854023_3	386456.JQKN01000013_gene2984	6.37e-14	68.2	COG0784@1|root,arCOG06537@2157|Archaea	386456.JQKN01000013_gene2984|-	T	response regulator, receiver	-	-	-	-	-	-	-	-	-	-	-	-	-
	NODE_3793_length_3607_cov_0.854023_4	386456.JQKN01000013_gene2984	7.75e-15	69.7	COG0784@1|root,arCOG06537@2157|Archaea	386456.JQKN01000013_gene2984|-	T	response regulator, receiver	-	-	-	-	-	-	-	-	-	-	-	-	-
	NODE_3793_length_3607_cov_0.854023_5	386456.JQKN01000013_gene2985	2.64e-217	604.0	COG1060@1|root,arCOG00657@2157|Archaea,2XT78@28890|Euryarchaeota,23NJP@183925|Methanobacteria	183925|Methanobacteria	H	Catalyzes the radical-mediated transfer of the hydroxybenzyl group from 4-hydroxyphenylpyruvate (HPP) to 5-amino- 6-ribitylamino-2,4(1H,3H)-pyrimidinedione to form 7,8-didemethyl- 8-hydroxy-5-deazariboflavin (FO)	cofG	-	2.5.1.77	ko:K11780	ko00680,ko01120,map00680,map01120	M00378	R09396	RC01381,RC03002,RC03007	ko00000,ko00001,ko00002,ko01000	-	-	-	Radical_SAM
	NODE_3793_length_3607_cov_0.854023_6	386456.JQKN01000013_gene2986	1.98e-62	195.0	COG4077@1|root,arCOG04873@2157|Archaea,2Y02U@28890|Euryarchaeota,23P7C@183925|Methanobacteria	183925|Methanobacteria	S	Uncharacterized protein conserved in archaea (DUF2120)	-	-	-	-	-	-	-	-	-	-	-	-	DUF2120
	NODE_3793_length_3607_cov_0.854023_7	386456.JQKN01000013_gene2987	3.12e-75	234.0	COG1469@1|root,arCOG04301@2157|Archaea,2XT11@28890|Euryarchaeota,23NNB@183925|Methanobacteria	183925|Methanobacteria	H	Converts GTP to 7,8-dihydro-D-neopterin 2',3'-cyclic phosphate, the first intermediate in the biosynthesis of coenzyme methanopterin	mptA	-	3.5.4.39	ko:K17488	ko00790,map00790	-	R10348	RC02504,RC03131	ko00000,ko00001,ko01000	-	-	-	GCHY-1
	NODE_3685_length_3745_cov_1.660862_2	395961.Cyan7425_2664	4.54e-48	166.0	COG1453@1|root,COG1453@2|Bacteria	2|Bacteria	S	Aldo/keto reductase family	asrA	-	-	ko:K16950	ko00920,ko01120,map00920,map01120	-	R00858,R10146	RC00065	ko00000,ko00001	-	-	-	Aldo_ket_red,Fer4_22
	NODE_3685_length_3745_cov_1.660862_3	395961.Cyan7425_2664	6.1299999999999995e-84	261.0	COG1453@1|root,COG1453@2|Bacteria	2|Bacteria	S	Aldo/keto reductase family	asrA	-	-	ko:K16950	ko00920,ko01120,map00920,map01120	-	R00858,R10146	RC00065	ko00000,ko00001	-	-	-	Aldo_ket_red,Fer4_22
	NODE_3685_length_3745_cov_1.660862_4	247490.KSU1_A0075	5.36e-99	298.0	COG0543@1|root,COG0543@2|Bacteria,2IYBB@203682|Planctomycetes	203682|Planctomycetes	C	Iron-sulfur cluster binding domain of dihydroorotate dehydrogenase B	-	-	-	-	-	-	-	-	-	-	-	-	DHODB_Fe-S_bind,FAD_binding_6,NAD_binding_1
	NODE_3685_length_3745_cov_1.660862_5	1134912.AJTV01000021_gene3009	1.52e-110	326.0	COG1941@1|root,COG1941@2|Bacteria,1NS0E@1224|Proteobacteria,2TVJC@28211|Alphaproteobacteria,36ZAX@31993|Methylocystaceae	28211|Alphaproteobacteria	C	NADH ubiquinone oxidoreductase, 20 Kd subunit	-	-	1.12.1.2	ko:K18007	-	-	-	-	ko00000,ko01000	-	-	-	Oxidored_q6
	NODE_3668_length_3779_cov_0.675794_1	386456.JQKN01000002_gene2738	2.01e-41	138.0	COG0231@1|root,arCOG04277@2157|Archaea,2XX3E@28890|Euryarchaeota,23PK8@183925|Methanobacteria	183925|Methanobacteria	J	Functions by promoting the formation of the first peptide bond	eif5a	-	-	ko:K03263	-	-	-	-	ko00000,ko03012	-	-	-	eIF-5a
	NODE_3668_length_3779_cov_0.675794_2	386456.JQKN01000002_gene2737	9.03e-149	425.0	COG0010@1|root,arCOG01700@2157|Archaea,2XTEP@28890|Euryarchaeota,23NYZ@183925|Methanobacteria	183925|Methanobacteria	E	Belongs to the arginase family	-	-	3.5.3.11	ko:K01480	ko00330,ko01100,map00330,map01100	M00133	R01157	RC00024,RC00329	ko00000,ko00001,ko00002,ko01000	-	-	-	Arginase
	NODE_3668_length_3779_cov_0.675794_3	386456.JQKN01000002_gene2736	8.51e-256	706.0	COG1915@1|root,arCOG04422@2157|Archaea,2XTUK@28890|Euryarchaeota,23NW5@183925|Methanobacteria	183925|Methanobacteria	S	(LOR SDH) bifunctional enzyme	-	-	-	-	-	-	-	-	-	-	-	-	Saccharop_dh_N
	NODE_3668_length_3779_cov_0.675794_4	398767.Glov_2465	3.29e-53	177.0	COG1321@1|root,COG1918@1|root,COG1321@2|Bacteria,COG1918@2|Bacteria,1N3ZM@1224|Proteobacteria,42TUU@68525|delta/epsilon subdivisions,2WQ8Z@28221|Deltaproteobacteria,43TAJ@69541|Desulfuromonadales	28221|Deltaproteobacteria	KP	PFAM iron dependent repressor	ideR	-	-	ko:K03709	-	-	-	-	ko00000,ko03000	-	-	-	Fe_dep_repr_C,FeoA
	NODE_3658_length_3792_cov_1.295498_1	926550.CLDAP_03240	5.15e-35	145.0	COG1287@1|root,COG1287@2|Bacteria	2|Bacteria	S	oligosaccharyl transferase activity	-	-	2.4.99.18	ko:K07151	ko00510,ko00513,ko01100,ko04141,map00510,map00513,map01100,map04141	M00072	R04216,R05976	RC00005,RC00482	ko00000,ko00001,ko00002,ko01000,ko01003	-	GT66	-	-
	NODE_3658_length_3792_cov_1.295498_2	911045.PSE_1994	3.23e-26	117.0	COG1807@1|root,COG1807@2|Bacteria,1R77I@1224|Proteobacteria,2U3HK@28211|Alphaproteobacteria	28211|Alphaproteobacteria	M	4-amino-4-deoxy-L-arabinose transferase and related glycosyltransferases of PMT family	-	-	-	-	-	-	-	-	-	-	-	-	PMT_2
	NODE_3519_length_3965_cov_1.510422_1	357244.OTBS_1718	7.18e-107	337.0	COG0006@1|root,COG0006@2|Bacteria,1MUZS@1224|Proteobacteria,2TQXN@28211|Alphaproteobacteria,47EUI@766|Rickettsiales	766|Rickettsiales	E	COG0006 Xaa-Pro aminopeptidase	pepP	-	3.4.11.9	ko:K01262	-	-	-	-	ko00000,ko01000,ko01002	-	-	-	Creatinase_N,Creatinase_N_2,Peptidase_M24,Peptidase_M24_C
	NODE_3519_length_3965_cov_1.510422_2	696369.KI912183_gene2246	1.0899999999999999e-45	155.0	COG0778@1|root,COG0778@2|Bacteria,1V0Y6@1239|Firmicutes,24HMV@186801|Clostridia,261V8@186807|Peptococcaceae	186801|Clostridia	C	Putative TM nitroreductase	-	-	-	-	-	-	-	-	-	-	-	-	Nitroreductase
	NODE_3519_length_3965_cov_1.510422_3	436114.SYO3AOP1_0456	4.2200000000000004e-70	221.0	COG1180@1|root,COG1180@2|Bacteria	2|Bacteria	C	glycyl-radical enzyme activating activity	nrdG	-	1.97.1.4,4.3.99.3	ko:K04069,ko:K10026	ko00790,ko01100,map00790,map01100	-	R04710,R10002	RC02989	ko00000,ko00001,ko01000,ko03016	-	-	-	Fer4_12,Fer4_14,Radical_SAM
	NODE_3519_length_3965_cov_1.510422_4	336407.RBE_0199	6.330000000000001e-75	233.0	COG1136@1|root,COG1136@2|Bacteria,1MVSQ@1224|Proteobacteria,2TSBE@28211|Alphaproteobacteria,47FA2@766|Rickettsiales	766|Rickettsiales	V	Part of the ABC transporter complex LolCDE involved in the translocation of mature outer membrane-directed lipoproteins, from the inner membrane to the periplasmic chaperone, LolA. Responsible for the formation of the LolA-lipoprotein complex in an ATP-dependent manner	lolD	-	-	ko:K09810	ko02010,map02010	M00255	-	-	ko00000,ko00001,ko00002,ko01000,ko02000	3.A.1.125	-	-	ABC_tran
	NODE_3519_length_3965_cov_1.510422_5	272947.RP699	4.57e-24	100.0	COG4591@1|root,COG4591@2|Bacteria,1MVV7@1224|Proteobacteria,2TRBX@28211|Alphaproteobacteria,47EU5@766|Rickettsiales	766|Rickettsiales	M	Lipoprotein releasing system transmembrane protein	lolC	-	-	ko:K09808	ko02010,map02010	M00255	-	-	ko00000,ko00001,ko00002,ko02000	3.A.1.125	-	-	FtsX,MacB_PCD
	NODE_3453_length_4038_cov_2.526975_1	386456.JQKN01000001_gene2114	1.0300000000000001e-80	265.0	COG1305@1|root,arCOG02165@2157|Archaea	2157|Archaea	E	PFAM Transglutaminase-like	-	-	-	-	-	-	-	-	-	-	-	-	DUF4015,PMBR,Transglut_core
	NODE_3453_length_4038_cov_2.526975_2	386456.JQKN01000002_gene2604	1.13e-178	531.0	COG1305@1|root,arCOG03946@1|root,arCOG02165@2157|Archaea,arCOG03946@2157|Archaea,2XXMP@28890|Euryarchaeota,23PG0@183925|Methanobacteria	183925|Methanobacteria	E	PFAM Transglutaminase-like	-	-	-	-	-	-	-	-	-	-	-	-	DUF4015,PMBR,Transglut_core
	NODE_3453_length_4038_cov_2.526975_3	386456.JQKN01000002_gene2604	1.38e-68	231.0	COG1305@1|root,arCOG03946@1|root,arCOG02165@2157|Archaea,arCOG03946@2157|Archaea,2XXMP@28890|Euryarchaeota,23PG0@183925|Methanobacteria	183925|Methanobacteria	E	PFAM Transglutaminase-like	-	-	-	-	-	-	-	-	-	-	-	-	DUF4015,PMBR,Transglut_core
	NODE_3444_length_4054_cov_0.805195_1	386456.JQKN01000015_gene2929	0.0	956.0	COG0028@1|root,arCOG01998@2157|Archaea,2XT5F@28890|Euryarchaeota,23NN4@183925|Methanobacteria	183925|Methanobacteria	E	Acetolactate synthase, large subunit	ilvB1	-	2.2.1.6	ko:K01652	ko00290,ko00650,ko00660,ko00770,ko01100,ko01110,ko01130,ko01210,ko01230,map00290,map00650,map00660,map00770,map01100,map01110,map01130,map01210,map01230	M00019,M00570	R00006,R00014,R00226,R03050,R04672,R04673,R08648	RC00027,RC00106,RC01192,RC02744,RC02893	ko00000,ko00001,ko00002,ko01000	-	-	-	TPP_enzyme_C,TPP_enzyme_M,TPP_enzyme_N
	NODE_3444_length_4054_cov_0.805195_2	386456.JQKN01000015_gene2928	3.97e-100	292.0	COG0440@1|root,arCOG04445@2157|Archaea,2XVFX@28890|Euryarchaeota,23P3W@183925|Methanobacteria	183925|Methanobacteria	E	Acetolactate synthase, small subunit	ilvN	-	2.2.1.6	ko:K01653	ko00290,ko00650,ko00660,ko00770,ko01100,ko01110,ko01130,ko01210,ko01230,map00290,map00650,map00660,map00770,map01100,map01110,map01130,map01210,map01230	M00019,M00570	R00006,R00014,R00226,R03050,R04672,R04673,R08648	RC00027,RC00106,RC01192,RC02744,RC02893	ko00000,ko00001,ko00002,ko01000	-	-	-	ACT,ACT_5,ALS_ss_C
	NODE_3444_length_4054_cov_0.805195_3	386456.JQKN01000015_gene2925	5.52e-203	565.0	COG0059@1|root,arCOG04465@2157|Archaea,2XTGU@28890|Euryarchaeota,23NNG@183925|Methanobacteria	183925|Methanobacteria	E	Involved in the biosynthesis of branched-chain amino acids (BCAA). Catalyzes an alkyl-migration followed by a ketol- acid reduction of (S)-2-acetolactate (S2AL) to yield (R)-2,3- dihydroxy-isovalerate. In the isomerase reaction, S2AL is rearranged via a Mg-dependent methyl migration to produce 3- hydroxy-3-methyl-2-ketobutyrate (HMKB). In the reductase reaction, this 2-ketoacid undergoes a metal-…	ilvC	-	1.1.1.86	ko:K00053	ko00290,ko00770,ko01100,ko01110,ko01130,ko01210,ko01230,map00290,map00770,map01100,map01110,map01130,map01210,map01230	M00019,M00570	R03051,R04439,R04440,R05068,R05069,R05071	RC00726,RC00836,RC00837,RC01726	ko00000,ko00001,ko00002,ko01000	-	-	-	IlvC,IlvN
	NODE_3444_length_4054_cov_0.805195_4	386456.JQKN01000015_gene2924	2.21e-16	77.8	COG4020@1|root,arCOG04885@2157|Archaea,2XV89@28890|Euryarchaeota,23NJ2@183925|Methanobacteria	183925|Methanobacteria	S	Belongs to the UPF0285 family	-	-	-	-	-	-	-	-	-	-	-	-	-
	NODE_3431_length_4071_cov_1.415061_1	386456.JQKN01000008_gene1503	1.84e-80	249.0	COG0457@1|root,arCOG03038@2157|Archaea,2XUNW@28890|Euryarchaeota	28890|Euryarchaeota	O	TPR repeat-containing protein	-	-	-	-	-	-	-	-	-	-	-	-	TPR_1,TPR_16,TPR_2,TPR_8
	NODE_3431_length_4071_cov_1.415061_3	1305737.JAFX01000001_gene1798	1.39e-12	68.6	COG0784@1|root,COG0784@2|Bacteria,4PNN1@976|Bacteroidetes,47YGQ@768503|Cytophagia	976|Bacteroidetes	T	cheY-homologous receiver domain	-	-	-	-	-	-	-	-	-	-	-	-	Response_reg
	NODE_3431_length_4071_cov_1.415061_4	386456.JQKN01000014_gene3097	5.78e-100	323.0	COG0642@1|root,COG2203@1|root,arCOG02350@1|root,arCOG06712@1|root,arCOG07605@1|root,arCOG02350@2157|Archaea,arCOG02356@2157|Archaea,arCOG06192@2157|Archaea,arCOG06712@2157|Archaea,arCOG07605@2157|Archaea,2Y7TU@28890|Euryarchaeota	28890|Euryarchaeota	T	GAF domain	-	-	-	-	-	-	-	-	-	-	-	-	GAF_2,HATPase_c,PAS_9
	NODE_3431_length_4071_cov_1.415061_5	877455.Metbo_1622	6.48e-53	193.0	COG2203@1|root,COG3413@1|root,arCOG02352@1|root,arCOG04001@1|root,arCOG06712@1|root,arCOG07605@1|root,arCOG02278@2157|Archaea,arCOG02352@2157|Archaea,arCOG02356@2157|Archaea,arCOG04001@2157|Archaea,arCOG06712@2157|Archaea,arCOG07605@2157|Archaea	2157|Archaea	T	Histidine kinase-like ATPases	-	-	-	-	-	-	-	-	-	-	-	-	GAF,GAF_2,HATPase_c,HisKA,HisKA_2,PAS,PAS_3,PAS_4,PAS_9,Response_reg
	NODE_3431_length_4071_cov_1.415061_6	868131.MSWAN_1118	1.18e-46	155.0	COG3324@1|root,arCOG04946@2157|Archaea,2Y0WQ@28890|Euryarchaeota	28890|Euryarchaeota	E	Glyoxalase-like domain	-	-	-	ko:K06996	-	-	-	-	ko00000	-	-	-	Glyoxalase
	NODE_3294_length_4261_cov_1.698355_1	1319815.HMPREF0202_02132	2.52e-05	48.1	COG1451@1|root,COG1451@2|Bacteria,378PN@32066|Fusobacteria	32066|Fusobacteria	S	Protein of unknown function DUF45	-	-	-	ko:K07043	-	-	-	-	ko00000	-	-	-	DUF45
	NODE_3294_length_4261_cov_1.698355_2	266117.Rxyl_0901	7.01e-14	72.4	COG0350@1|root,COG2169@1|root,COG0350@2|Bacteria,COG2169@2|Bacteria,2IH0Y@201174|Actinobacteria,4CU32@84995|Rubrobacteria	84995|Rubrobacteria	H	methylated-DNA- protein -cysteine S-methyltransferase	-	-	2.1.1.63	ko:K00567	-	-	-	-	ko00000,ko01000,ko03400	-	-	-	Ada_Zn_binding,DNA_binding_1
	NODE_3294_length_4261_cov_1.698355_3	413404.Rmag_0637	1.2599999999999999e-68	218.0	COG4912@1|root,COG4912@2|Bacteria,1QJE1@1224|Proteobacteria,1S2U6@1236|Gammaproteobacteria,1JATV@118884|unclassified Gammaproteobacteria	1236|Gammaproteobacteria	L	DNA alkylation repair enzyme	-	-	-	-	-	-	-	-	-	-	-	-	DNA_alkylation
	NODE_3294_length_4261_cov_1.698355_4	1232410.KI421413_gene633	5.36e-72	221.0	2AUXR@1|root,2ZBPW@2|Bacteria,1RAID@1224|Proteobacteria,42QWQ@68525|delta/epsilon subdivisions,2WMRI@28221|Deltaproteobacteria,43T93@69541|Desulfuromonadales	28221|Deltaproteobacteria	-	-	-	-	-	-	-	-	-	-	-	-	-	-	-
	NODE_3294_length_4261_cov_1.698355_5	1454004.AW11_01247	6.649999999999999e-24	106.0	COG1512@1|root,COG1512@2|Bacteria,1PB41@1224|Proteobacteria,2VMNV@28216|Betaproteobacteria,1KQPB@119066|unclassified Betaproteobacteria	28216|Betaproteobacteria	S	TPM domain	-	-	-	ko:K06872	-	-	-	-	ko00000	-	-	-	TPM_phosphatase
	NODE_3294_length_4261_cov_1.698355_6	1266845.Q783_05210	1.95e-31	120.0	COG1704@1|root,COG1704@2|Bacteria,1V3Z0@1239|Firmicutes,4HH6X@91061|Bacilli,27GBZ@186828|Carnobacteriaceae	91061|Bacilli	S	LemA family	lemA	-	-	ko:K03744	-	-	-	-	ko00000	-	-	-	LemA
	NODE_3259_length_4309_cov_1.074605_1	386456.JQKN01000008_gene1354	2.48e-08	54.7	COG0463@1|root,arCOG00894@2157|Archaea,2XVRD@28890|Euryarchaeota,23PAS@183925|Methanobacteria	183925|Methanobacteria	M	PFAM Glycosyl transferase family 2	-	-	-	-	-	-	-	-	-	-	-	-	Glycos_transf_2
	NODE_3259_length_4309_cov_1.074605_2	386456.JQKN01000005_gene515	6.18e-84	253.0	COG0746@1|root,arCOG01872@2157|Archaea,2XWJR@28890|Euryarchaeota,23PNI@183925|Methanobacteria	183925|Methanobacteria	H	Transfers a GMP moiety from GTP to Mo-molybdopterin (Mo- MPT) cofactor (Moco or molybdenum cofactor) to form Mo- molybdopterin guanine dinucleotide (Mo-MGD) cofactor	mobA	-	2.7.7.77	ko:K03752	ko00790,ko01100,map00790,map01100	-	R11581	-	ko00000,ko00001,ko01000	-	-	-	NTP_transf_3
	NODE_3259_length_4309_cov_1.074605_3	386456.JQKN01000005_gene514	5.28e-306	840.0	COG0516@1|root,arCOG00612@2157|Archaea,2XU40@28890|Euryarchaeota,23NJA@183925|Methanobacteria	183925|Methanobacteria	F	Catalyzes the conversion of inosine 5'-phosphate (IMP) to xanthosine 5'-phosphate (XMP), the first committed and rate- limiting step in the de novo synthesis of guanine nucleotides, and therefore plays an important role in the regulation of cell growth	guaB	-	1.1.1.205	ko:K00088	ko00230,ko00983,ko01100,ko01110,map00230,map00983,map01100,map01110	M00050	R01130,R08240	RC00143,RC02207	ko00000,ko00001,ko00002,ko01000,ko04147	-	-	-	CBS,IMPDH
	NODE_3259_length_4309_cov_1.074605_4	386456.JQKN01000005_gene513	1.03e-148	421.0	COG1891@1|root,arCOG04482@2157|Archaea,2XUBQ@28890|Euryarchaeota,23NU2@183925|Methanobacteria	183925|Methanobacteria	H	Catalyzes the formation of 4-(hydroxymethyl)-2- furancarboxaldehyde phosphate (4-HFC-P) from two molecules of glyceraldehyde-3-P (GA-3-P)	mfnB	-	4.2.3.153	ko:K09733	ko00680,map00680	-	R10935	RC03315	ko00000,ko00001,ko01000	-	-	-	4HFCP_synth
	NODE_3259_length_4309_cov_1.074605_5	386456.JQKN01000005_gene512	9.549999999999999e-138	400.0	COG1139@1|root,arCOG00335@2157|Archaea,2Y85J@28890|Euryarchaeota,23PHX@183925|Methanobacteria	183925|Methanobacteria	C	LUD domain	-	-	-	ko:K00782	-	-	-	-	ko00000	-	-	-	Fer4_8,LUD_dom
	NODE_3233_length_4348_cov_0.538261_1	315456.RF_0583	1.9e-124	365.0	COG0679@1|root,COG0679@2|Bacteria,1N1X9@1224|Proteobacteria,2TV2I@28211|Alphaproteobacteria,47G0N@766|Rickettsiales	766|Rickettsiales	S	Sodium Bile acid symporter family	-	-	-	ko:K07088	-	-	-	-	ko00000	-	-	-	Mem_trans
	NODE_3233_length_4348_cov_0.538261_2	293613.A1E_00850	3.43e-122	357.0	COG2171@1|root,COG2171@2|Bacteria,1MU0Y@1224|Proteobacteria,2TS3H@28211|Alphaproteobacteria,47F2X@766|Rickettsiales	766|Rickettsiales	E	Belongs to the transferase hexapeptide repeat family	dapD	-	2.3.1.117	ko:K00674	ko00300,ko01100,ko01120,ko01230,map00300,map01100,map01120,map01230	M00016	R04365	RC00004,RC01136	ko00000,ko00001,ko00002,ko01000	-	-	-	Hexapep,Hexapep_2,THDPS_N_2
	NODE_3233_length_4348_cov_0.538261_3	336407.RBE_1142	5.33e-20	90.9	2E521@1|root,32ZVA@2|Bacteria,1NH3G@1224|Proteobacteria,2UKE1@28211|Alphaproteobacteria,47FS9@766|Rickettsiales	766|Rickettsiales	S	zinc-ribbon domain	-	-	-	-	-	-	-	-	-	-	-	-	zinc_ribbon_4
	NODE_3233_length_4348_cov_0.538261_4	336407.RBE_1237	1.74e-37	134.0	COG1714@1|root,COG1714@2|Bacteria,1NKF8@1224|Proteobacteria,2VGAW@28211|Alphaproteobacteria,47FS1@766|Rickettsiales	766|Rickettsiales	S	RDD family	-	-	-	-	-	-	-	-	-	-	-	-	RDD
	NODE_3220_length_4377_cov_1.216000_1	575586.HMPREF0016_00134	5.4e-97	292.0	COG3633@1|root,COG3633@2|Bacteria,1MXE1@1224|Proteobacteria,1RP9B@1236|Gammaproteobacteria,3NIMG@468|Moraxellaceae	1236|Gammaproteobacteria	E	Involved in the import of serine and threonine into the cell, with the concomitant import of sodium (symport system)	sstT	GO:0003333,GO:0003674,GO:0005215,GO:0005283,GO:0005295,GO:0005310,GO:0005342,GO:0005343,GO:0005416,GO:0005575,GO:0005623,GO:0005886,GO:0006810,GO:0006811,GO:0006812,GO:0006814,GO:0006820,GO:0006835,GO:0006865,GO:0008150,GO:0008324,GO:0008509,GO:0008514,GO:0015075,GO:0015077,GO:0015081,GO:0015171,GO:0015175,GO:0015291,GO:0015293,GO:0015294,GO:0015318,GO:0015370,GO:0015672,GO:0015711,GO:0015804,GO:…	-	ko:K07862	-	-	-	-	ko00000,ko02000	2.A.23.4	-	iAF1260.b3089,iBWG_1329.BWG_2799,iECDH10B_1368.ECDH10B_3265,iECDH1ME8569_1439.ECDH1ME8569_2984,iECH74115_1262.ECH74115_4404,iECIAI1_1343.ECIAI1_3235,iECO103_1326.ECO103_3834,iECO111_1330.ECO111_3911,iECO26_1355.ECO26_4192,iECP_1309.ECP_3180,iECSE_1348.ECSE_3370,iECSP_1301.ECSP_4063,iECUMN_1333.ECUMN_3573,iECW_1372.ECW_m3356,iECs_1301.ECs3971,iEKO11_1354.EKO11_0630,iETEC_1333.ETEC_3359,iEcDH1_1363…	SDF
	NODE_3220_length_4377_cov_1.216000_2	575586.HMPREF0016_00133	0.0	1075.0	COG0659@1|root,COG0659@2|Bacteria,1MWDF@1224|Proteobacteria,1SYC8@1236|Gammaproteobacteria,3NIX9@468|Moraxellaceae	1236|Gammaproteobacteria	U	STAS domain	sulP	-	-	ko:K03321	-	-	-	-	ko00000,ko02000	2.A.53.3	-	-	STAS,Sulfate_transp
	NODE_3220_length_4377_cov_1.216000_3	575586.HMPREF0016_00132	4.76e-65	198.0	COG0640@1|root,COG0640@2|Bacteria,1N72Q@1224|Proteobacteria,1SCH5@1236|Gammaproteobacteria,3NNVM@468|Moraxellaceae	1236|Gammaproteobacteria	K	helix_turn_helix, Arsenical Resistance Operon Repressor	bigR	GO:0000976,GO:0001067,GO:0001130,GO:0001217,GO:0003674,GO:0003676,GO:0003677,GO:0003690,GO:0003700,GO:0005488,GO:0005575,GO:0006355,GO:0008150,GO:0009889,GO:0009890,GO:0009892,GO:0010468,GO:0010556,GO:0010558,GO:0010605,GO:0010629,GO:0019219,GO:0019222,GO:0031323,GO:0031324,GO:0031326,GO:0031327,GO:0032991,GO:0032993,GO:0043565,GO:0044212,GO:0045892,GO:0045934,GO:0048519,GO:0048523,GO:0050789,GO:…	-	-	-	-	-	-	-	-	-	-	HTH_5
	NODE_3220_length_4377_cov_1.216000_4	575586.HMPREF0016_00124	4.41e-199	554.0	COG0031@1|root,COG0031@2|Bacteria,1MUBE@1224|Proteobacteria,1RN6J@1236|Gammaproteobacteria,3NJTJ@468|Moraxellaceae	1236|Gammaproteobacteria	E	Belongs to the cysteine synthase cystathionine beta- synthase family	cysK	GO:0000096,GO:0000097,GO:0003674,GO:0003824,GO:0004124,GO:0005488,GO:0005575,GO:0005622,GO:0005623,GO:0005737,GO:0005829,GO:0006082,GO:0006520,GO:0006534,GO:0006535,GO:0006563,GO:0006790,GO:0006807,GO:0008144,GO:0008150,GO:0008152,GO:0008652,GO:0009058,GO:0009069,GO:0009070,GO:0009333,GO:0009987,GO:0016053,GO:0016740,GO:0016765,GO:0016829,GO:0016846,GO:0019344,GO:0019752,GO:0019842,GO:0030170,GO:…	2.5.1.47	ko:K01738	ko00270,ko00920,ko01100,ko01110,ko01120,ko01130,ko01200,ko01230,map00270,map00920,map01100,map01110,map01120,map01130,map01200,map01230	M00021	R00897,R03601,R04859	RC00020,RC02814,RC02821	ko00000,ko00001,ko00002,ko01000	-	-	iAF1260.b2414,iAPECO1_1312.APECO1_4131,iB21_1397.B21_02275,iBWG_1329.BWG_2176,iE2348C_1286.E2348C_2600,iEC042_1314.EC042_2623,iEC55989_1330.EC55989_2704,iECABU_c1320.ECABU_c27350,iECBD_1354.ECBD_1267,iECB_1328.ECB_02314,iECDH10B_1368.ECDH10B_2579,iECDH1ME8569_1439.ECDH1ME8569_2348,iECD_1391.ECD_02314,iECED1_1282.ECED1_2858,iECH74115_1262.ECH74115_3645,iECIAI1_1343.ECIAI1_2472,iECNA114_1301.ECNA11…	PALP
	NODE_2968_length_4825_cov_2.650064_1	1219084.AP014508_gene1898	1.05e-175	524.0	COG0272@1|root,COG0272@2|Bacteria,2GCF6@200918|Thermotogae	200918|Thermotogae	L	DNA ligase that catalyzes the formation of phosphodiester linkages between 5'-phosphoryl and 3'-hydroxyl groups in double-stranded DNA using NAD as a coenzyme and as the energy source for the reaction. It is essential for DNA replication and repair of damaged DNA	ligA	GO:0003674,GO:0003824,GO:0003909,GO:0003911,GO:0005575,GO:0005622,GO:0005623,GO:0005737,GO:0005829,GO:0006139,GO:0006259,GO:0006266,GO:0006281,GO:0006284,GO:0006288,GO:0006725,GO:0006807,GO:0006950,GO:0006974,GO:0008150,GO:0008152,GO:0009987,GO:0016874,GO:0016886,GO:0033554,GO:0034641,GO:0043170,GO:0044237,GO:0044238,GO:0044260,GO:0044424,GO:0044444,GO:0044464,GO:0046483,GO:0050896,GO:0051103,GO:…	6.5.1.2	ko:K01972	ko03030,ko03410,ko03420,ko03430,map03030,map03410,map03420,map03430	-	R00382	RC00005	ko00000,ko00001,ko01000,ko03032,ko03400	-	-	-	BRCT,DNA_ligase_OB,DNA_ligase_ZBD,DNA_ligase_aden,HHH_2,HHH_5
	NODE_2968_length_4825_cov_2.650064_2	596323.HMPREF0554_0702	5.89e-05	45.8	COG0721@1|root,COG0721@2|Bacteria,37B45@32066|Fusobacteria	32066|Fusobacteria	J	Allows the formation of correctly charged Asn-tRNA(Asn) or Gln-tRNA(Gln) through the transamidation of misacylated Asp- tRNA(Asn) or Glu-tRNA(Gln) in organisms which lack either or both of asparaginyl-tRNA or glutaminyl-tRNA synthetases. The reaction takes place in the presence of glutamine and ATP through an activated phospho-Asp-tRNA(Asn) or phospho-Glu-tRNA(Gln)	gatC	-	6.3.5.6,6.3.5.7	ko:K02435	ko00970,ko01100,map00970,map01100	-	R03905,R04212	RC00010	ko00000,ko00001,ko01000,ko03029	-	-	-	Glu-tRNAGln
	NODE_2968_length_4825_cov_2.650064_3	1216932.CM240_0266	7.1800000000000006e-124	376.0	COG0154@1|root,COG0154@2|Bacteria,1TP0C@1239|Firmicutes,24911@186801|Clostridia,36DQW@31979|Clostridiaceae	186801|Clostridia	J	Allows the formation of correctly charged Gln-tRNA(Gln) through the transamidation of misacylated Glu-tRNA(Gln) in organisms which lack glutaminyl-tRNA synthetase. The reaction takes place in the presence of glutamine and ATP through an activated gamma-phospho-Glu-tRNA(Gln)	gatA	-	6.3.5.6,6.3.5.7	ko:K02433	ko00970,ko01100,map00970,map01100	-	R03905,R04212	RC00010	ko00000,ko00001,ko01000,ko03029	-	-	-	Amidase
	NODE_2832_length_5101_cov_0.760555_1	386456.JQKN01000013_gene3011	4.58e-37	138.0	COG3276@1|root,arCOG01562@2157|Archaea,2XTHU@28890|Euryarchaeota,23PXY@183925|Methanobacteria	183925|Methanobacteria	J	Translation elongation factor EFTu EF1A, domain 2	-	-	-	ko:K03231	ko03013,ko05134,map03013,map05134	-	-	-	ko00000,ko00001,ko03012,ko03016,ko03019,ko04131,ko04147	-	-	-	GTP_EFTU,GTP_EFTU_D2,GTP_EFTU_D3
	NODE_2832_length_5101_cov_0.760555_2	386456.JQKN01000013_gene3011	6.230000000000001e-164	473.0	COG3276@1|root,arCOG01562@2157|Archaea,2XTHU@28890|Euryarchaeota,23PXY@183925|Methanobacteria	183925|Methanobacteria	J	Translation elongation factor EFTu EF1A, domain 2	-	-	-	ko:K03231	ko03013,ko05134,map03013,map05134	-	-	-	ko00000,ko00001,ko03012,ko03016,ko03019,ko04131,ko04147	-	-	-	GTP_EFTU,GTP_EFTU_D2,GTP_EFTU_D3
	NODE_2832_length_5101_cov_0.760555_3	386456.JQKN01000013_gene3012	4.46e-36	122.0	arCOG05509@1|root,arCOG05509@2157|Archaea,2Y0XE@28890|Euryarchaeota,23P7F@183925|Methanobacteria	183925|Methanobacteria	S	Domain of unknown function (DUF1922)	-	-	-	-	-	-	-	-	-	-	-	-	DUF1922
	NODE_2832_length_5101_cov_0.760555_4	386456.JQKN01000013_gene3013	8.39e-107	320.0	COG1916@1|root,arCOG02142@2157|Archaea,2XTNE@28890|Euryarchaeota,23NQ6@183925|Methanobacteria	183925|Methanobacteria	S	Pheromone shutdown	-	-	-	-	-	-	-	-	-	-	-	-	TraB
	NODE_2832_length_5101_cov_0.760555_5	386456.JQKN01000013_gene3013	3.9300000000000003e-85	263.0	COG1916@1|root,arCOG02142@2157|Archaea,2XTNE@28890|Euryarchaeota,23NQ6@183925|Methanobacteria	183925|Methanobacteria	S	Pheromone shutdown	-	-	-	-	-	-	-	-	-	-	-	-	TraB
	NODE_2832_length_5101_cov_0.760555_6	386456.JQKN01000013_gene3014	1.2500000000000001e-105	310.0	COG2045@1|root,arCOG04871@2157|Archaea,2XWMG@28890|Euryarchaeota,23P2V@183925|Methanobacteria	183925|Methanobacteria	H	2-phosphosulpholactate phosphatase	comB	-	3.1.3.71	ko:K05979	ko00680,ko01120,map00680,map01120	M00358	R05789	RC00428	ko00000,ko00001,ko00002,ko01000	-	-	-	2-ph_phosp
	NODE_2832_length_5101_cov_0.760555_7	868131.MSWAN_2069	2.21e-36	123.0	COG3269@1|root,arCOG01641@2157|Archaea,2Y1N9@28890|Euryarchaeota	28890|Euryarchaeota	S	PFAM Deoxyribonuclease rho motif-related TRAM	-	-	-	-	-	-	-	-	-	-	-	-	TRAM
	NODE_2832_length_5101_cov_0.760555_9	386456.JQKN01000013_gene3017	3.73e-36	124.0	COG1873@1|root,arCOG02155@2157|Archaea	386456.JQKN01000013_gene3017|-	S	PRC-barrel domain protein	-	-	-	-	-	-	-	-	-	-	-	-	-
	NODE_2832_length_5101_cov_0.760555_10	386456.JQKN01000013_gene3018	5.53e-08	52.0	arCOG02614@1|root,arCOG02614@2157|Archaea,2XZR2@28890|Euryarchaeota,23P58@183925|Methanobacteria	183925|Methanobacteria	-	-	-	-	-	ko:K06024	-	-	-	-	ko00000,ko03036	-	-	-	-
	NODE_2801_length_5174_cov_1.176144_1	272947.RP291	1.08e-20	94.0	COG2948@1|root,COG2948@2|Bacteria,1MU7U@1224|Proteobacteria,2U90W@28211|Alphaproteobacteria,47F8K@766|Rickettsiales	766|Rickettsiales	U	type IV secretory pathway, VirB10 components	virB10	-	-	ko:K03195	ko03070,map03070	M00333	-	-	ko00000,ko00001,ko00002,ko02044	3.A.7	-	-	TrbI
	NODE_2801_length_5174_cov_1.176144_2	391896.A1I_02290	5.93e-162	462.0	COG0630@1|root,COG0630@2|Bacteria,1QUJ6@1224|Proteobacteria,2TW2D@28211|Alphaproteobacteria,47EXK@766|Rickettsiales	766|Rickettsiales	NU	Type IV secretory pathway, VirB11 components, and related ATPases involved in	virB11	-	-	ko:K03196	ko03070,ko05120,map03070,map05120	M00333,M00564	-	-	ko00000,ko00001,ko00002,ko02044	3.A.7	-	-	T2SSE
	NODE_2801_length_5174_cov_1.176144_3	357244.OTBS_0007	1.2700000000000002e-302	840.0	COG3505@1|root,COG3505@2|Bacteria,1MV1G@1224|Proteobacteria,2TR6N@28211|Alphaproteobacteria,47EW8@766|Rickettsiales	766|Rickettsiales	U	Type IV secretion system protein VirD4	virD4	-	-	ko:K03205	ko03070,map03070	M00333	-	-	ko00000,ko00001,ko00002,ko02044	3.A.7	-	-	T4SS-DNA_transf
	NODE_2801_length_5174_cov_1.176144_4	336407.RBE_1019	4.79e-132	397.0	COG0248@1|root,COG0248@2|Bacteria,1MV35@1224|Proteobacteria,2TR1W@28211|Alphaproteobacteria,47G1X@766|Rickettsiales	766|Rickettsiales	FP	Ppx/GppA phosphatase family	gppA	-	3.6.1.11,3.6.1.40	ko:K01524	ko00230,map00230	-	R03409	RC00002	ko00000,ko00001,ko01000	-	-	-	Ppx-GppA
	NODE_2749_length_5278_cov_0.772471_2	386456.JQKN01000002_gene2790	3.24e-289	796.0	COG1690@1|root,arCOG04246@2157|Archaea,2XTIC@28890|Euryarchaeota,23NQ3@183925|Methanobacteria	183925|Methanobacteria	S	Belongs to the RtcB family	rtcB	-	6.5.1.3	ko:K14415	-	-	-	-	ko00000,ko01000,ko03016	-	-	-	RtcB
	NODE_2749_length_5278_cov_0.772471_3	386456.JQKN01000002_gene2802	9.620000000000001e-70	213.0	COG1371@1|root,arCOG04055@2157|Archaea,2XXRX@28890|Euryarchaeota,23P74@183925|Methanobacteria	183925|Methanobacteria	S	Activates the tRNA-splicing ligase complex by facilitating the enzymatic turnover of catalytic subunit RtcB. Acts by promoting the guanylylation of RtcB, a key intermediate step in tRNA ligation. Can also alter the NTP specificity of RtcB such that ATP, dGTP or ITP is used efficiently	-	-	-	-	-	-	-	-	-	-	-	-	Archease
	NODE_2749_length_5278_cov_0.772471_4	386456.JQKN01000002_gene2803	1.52e-231	656.0	COG0464@1|root,arCOG01308@2157|Archaea,2XSYR@28890|Euryarchaeota,23NT2@183925|Methanobacteria	183925|Methanobacteria	O	Cell division protein 48, CDC48, domain 2	-	-	-	ko:K13525	ko04141,ko05134,map04141,map05134	M00400,M00403	-	-	ko00000,ko00001,ko00002,ko03019,ko04131,ko04147	3.A.16.1	-	-	AAA,CDC48_2,CDC48_N
	NODE_2749_length_5278_cov_0.772471_5	386456.JQKN01000002_gene2803	2.2599999999999998e-180	523.0	COG0464@1|root,arCOG01308@2157|Archaea,2XSYR@28890|Euryarchaeota,23NT2@183925|Methanobacteria	183925|Methanobacteria	O	Cell division protein 48, CDC48, domain 2	-	-	-	ko:K13525	ko04141,ko05134,map04141,map05134	M00400,M00403	-	-	ko00000,ko00001,ko00002,ko03019,ko04131,ko04147	3.A.16.1	-	-	AAA,CDC48_2,CDC48_N
	NODE_2749_length_5278_cov_0.772471_6	386456.JQKN01000002_gene2803	1.82e-21	95.5	COG0464@1|root,arCOG01308@2157|Archaea,2XSYR@28890|Euryarchaeota,23NT2@183925|Methanobacteria	183925|Methanobacteria	O	Cell division protein 48, CDC48, domain 2	-	-	-	ko:K13525	ko04141,ko05134,map04141,map05134	M00400,M00403	-	-	ko00000,ko00001,ko00002,ko03019,ko04131,ko04147	3.A.16.1	-	-	AAA,CDC48_2,CDC48_N
	NODE_2719_length_5336_cov_0.995393_1	386456.JQKN01000003_gene422	1.78e-30	119.0	COG1145@1|root,arCOG02179@2157|Archaea,2XW8N@28890|Euryarchaeota,23PJX@183925|Methanobacteria	183925|Methanobacteria	C	4Fe-4S binding domain	-	-	-	-	-	-	-	-	-	-	-	-	Fer4,Fer4_7
	NODE_2719_length_5336_cov_0.995393_2	386456.JQKN01000003_gene423	4.01e-124	356.0	arCOG00628@1|root,arCOG00628@2157|Archaea,2XUWD@28890|Euryarchaeota,23PB9@183925|Methanobacteria	183925|Methanobacteria	S	CBS domain	-	-	-	-	-	-	-	-	-	-	-	-	CBS
	NODE_2719_length_5336_cov_0.995393_4	118168.MC7420_5393	4.7599999999999994e-67	236.0	COG0642@1|root,COG2202@1|root,COG2203@1|root,COG3920@1|root,COG2202@2|Bacteria,COG2203@2|Bacteria,COG2205@2|Bacteria,COG3920@2|Bacteria,1G09B@1117|Cyanobacteria,1HI0U@1150|Oscillatoriales	1117|Cyanobacteria	T	HWE histidine kinase	-	-	-	-	-	-	-	-	-	-	-	-	HATPase_c,HisKA,HisKA_2,PAS,PAS_3,PAS_4,PAS_9,Response_reg
	NODE_2719_length_5336_cov_0.995393_5	877455.Metbo_1328	6.46e-05	46.2	arCOG06712@1|root,arCOG07605@1|root,arCOG06712@2157|Archaea,arCOG07605@2157|Archaea	2157|Archaea	T	Histidine kinase-like ATPases	-	-	-	-	-	-	-	-	-	-	-	-	GAF,GAF_2,HATPase_c,HisKA,HisKA_2,PAS,PAS_3,PAS_4,PAS_9,Response_reg
	NODE_2719_length_5336_cov_0.995393_6	877455.Metbo_1895	3.1499999999999998e-52	187.0	COG0642@1|root,COG0784@1|root,COG3920@1|root,arCOG02335@2157|Archaea,arCOG06192@2157|Archaea,arCOG06537@2157|Archaea,2Y3ED@28890|Euryarchaeota	28890|Euryarchaeota	T	PFAM Signal transduction histidine kinase, subgroup 2, dimerisation and phosphoacceptor domain	-	-	-	-	-	-	-	-	-	-	-	-	HATPase_c,HisKA_2,Response_reg
	NODE_2719_length_5336_cov_0.995393_8	326427.Cagg_3132	6.64e-06	51.2	COG2373@1|root,COG4932@1|root,COG2373@2|Bacteria,COG4932@2|Bacteria,2GABV@200795|Chloroflexi,3752H@32061|Chloroflexia	32061|Chloroflexia	M	Cna B domain protein	-	-	-	-	-	-	-	-	-	-	-	-	DUF11,SdrD_B
	NODE_2719_length_5336_cov_0.995393_9	504472.Slin_0177	2.75e-08	55.5	COG4932@1|root,COG4932@2|Bacteria	2|Bacteria	M	domain protein	-	-	3.2.1.97	ko:K13735,ko:K17624	ko05100,map05100	-	-	-	ko00000,ko00001,ko01000	-	GH101	-	CW_binding_1,DUF11,DUF4856
	NODE_2623_length_5543_cov_1.030835_1	386456.JQKN01000011_gene728	6.6e-17	79.0	COG2133@1|root,arCOG03597@1|root,arCOG02796@2157|Archaea,arCOG03597@2157|Archaea	2157|Archaea	S	Protein of unknown function (DUF2769)	-	-	-	-	-	-	-	-	-	-	-	-	DUF2769,GSDH
	NODE_2623_length_5543_cov_1.030835_2	386456.JQKN01000011_gene729	1.07e-17	77.0	arCOG03597@1|root,arCOG03597@2157|Archaea	2157|Archaea	S	Protein of unknown function (DUF2769)	-	-	-	-	-	-	-	-	-	-	-	-	DUF2769
	NODE_2623_length_5543_cov_1.030835_3	386456.JQKN01000011_gene729	1.96e-13	65.1	arCOG03597@1|root,arCOG03597@2157|Archaea	2157|Archaea	S	Protein of unknown function (DUF2769)	-	-	-	-	-	-	-	-	-	-	-	-	DUF2769
	NODE_2623_length_5543_cov_1.030835_4	386456.JQKN01000012_gene1030	2.0599999999999997e-52	174.0	arCOG11916@1|root,arCOG11916@2157|Archaea	2157|Archaea	S	Sap, sulfolipid-1-addressing protein	-	-	-	-	-	-	-	-	-	-	-	-	SfLAP
	NODE_2623_length_5543_cov_1.030835_5	386456.JQKN01000012_gene1028	7.349999999999999e-42	140.0	COG4828@1|root,arCOG03300@2157|Archaea,2Y0K6@28890|Euryarchaeota	28890|Euryarchaeota	S	Protein of unknown function (DUF1622)	-	-	-	-	-	-	-	-	-	-	-	-	DUF1622
	NODE_2623_length_5543_cov_1.030835_6	386456.JQKN01000012_gene1027	1.25e-61	195.0	arCOG06491@1|root,arCOG06491@2157|Archaea,2Y28Q@28890|Euryarchaeota,23P91@183925|Methanobacteria	183925|Methanobacteria	-	-	-	-	-	-	-	-	-	-	-	-	-	-	-
	NODE_2623_length_5543_cov_1.030835_7	386456.JQKN01000012_gene1026	6.92e-51	166.0	arCOG06492@1|root,arCOG06492@2157|Archaea,2Y14E@28890|Euryarchaeota,23P78@183925|Methanobacteria	183925|Methanobacteria	-	-	-	-	-	-	-	-	-	-	-	-	-	-	-
	NODE_2623_length_5543_cov_1.030835_8	386456.JQKN01000012_gene1025	3.7e-158	449.0	COG0024@1|root,arCOG01001@2157|Archaea,2XT8G@28890|Euryarchaeota,23PDZ@183925|Methanobacteria	183925|Methanobacteria	E	Removes the N-terminal methionine from nascent proteins. The N-terminal methionine is often cleaved when the second residue in the primary sequence is small and uncharged (Met-Ala-, Cys, Gly, Pro, Ser, Thr, or Val)	map	-	3.4.11.18	ko:K01265	-	-	-	-	ko00000,ko01000,ko01002	-	-	-	Peptidase_M24
	NODE_2226_length_6752_cov_1.692679_1	386456.JQKN01000001_gene2114	5.3e-07	56.6	COG1305@1|root,arCOG02165@2157|Archaea	2157|Archaea	E	PFAM Transglutaminase-like	-	-	-	-	-	-	-	-	-	-	-	-	DUF4015,PMBR,Transglut_core
	NODE_2226_length_6752_cov_1.692679_2	386456.JQKN01000002_gene2606	9.709999999999999e-284	804.0	COG1305@1|root,arCOG02165@2157|Archaea,2XXMP@28890|Euryarchaeota,23PG0@183925|Methanobacteria	183925|Methanobacteria	E	PFAM Transglutaminase-like	-	-	-	-	-	-	-	-	-	-	-	-	DUF4015,PMBR,Transglut_core
	NODE_2226_length_6752_cov_1.692679_3	386456.JQKN01000002_gene2607	2.13e-21	92.8	COG1305@1|root,arCOG02165@2157|Archaea	2157|Archaea	E	PFAM Transglutaminase-like	-	-	-	-	-	-	-	-	-	-	-	-	DUF4015,PMBR,Transglut_core
	NODE_2226_length_6752_cov_1.692679_4	386456.JQKN01000002_gene2607	6.42e-17	79.3	COG1305@1|root,arCOG02165@2157|Archaea	2157|Archaea	E	PFAM Transglutaminase-like	-	-	-	-	-	-	-	-	-	-	-	-	DUF4015,PMBR,Transglut_core
	NODE_2226_length_6752_cov_1.692679_5	386456.JQKN01000014_gene3092	4.64e-35	146.0	arCOG02555@1|root,arCOG09729@1|root,arCOG02555@2157|Archaea,arCOG09729@2157|Archaea	2157|Archaea	E	Polymorphic membrane protein, Chlamydia	-	-	-	-	-	-	-	-	-	-	-	-	Big_5,Chlam_PMP
	NODE_2226_length_6752_cov_1.692679_6	386456.JQKN01000002_gene2608	1.3000000000000001e-122	362.0	COG0537@1|root,COG1992@1|root,arCOG00021@2157|Archaea,arCOG00419@2157|Archaea,2XWGT@28890|Euryarchaeota	28890|Euryarchaeota	F	COG0537 Diadenosine tetraphosphate (Ap4A) hydrolase and other HIT family hydrolases	hit1	-	2.5.1.3,2.7.7.53,3.6.1.17	ko:K01518,ko:K02503,ko:K19710,ko:K21220	ko00230,ko00240,ko00730,ko01100,map00230,map00240,map00730,map01100	-	R00126,R00184,R00969,R01232,R01618,R02805,R03223,R10712	RC00002,RC00224,RC02753,RC02795,RC03255,RC03397	ko00000,ko00001,ko01000,ko04147	-	-	-	HIT
	NODE_2144_length_7000_cov_1.266259_3	386456.JQKN01000007_gene3367	9.36e-44	149.0	arCOG06478@1|root,arCOG06478@2157|Archaea	2157|Archaea	S	Short repeat of unknown function (DUF308)	-	-	-	-	-	-	-	-	-	-	-	-	DUF308
	NODE_2144_length_7000_cov_1.266259_4	1220534.B655_2225	7.99e-43	147.0	COG0586@1|root,arCOG03117@2157|Archaea	2157|Archaea	S	membrane-associated protein	-	-	-	ko:K03975	-	-	-	-	ko00000	-	-	-	SNARE_assoc
	NODE_2144_length_7000_cov_1.266259_5	1220534.B655_2225	1.61e-30	114.0	COG0586@1|root,arCOG03117@2157|Archaea	2157|Archaea	S	membrane-associated protein	-	-	-	ko:K03975	-	-	-	-	ko00000	-	-	-	SNARE_assoc
	NODE_2144_length_7000_cov_1.266259_6	386456.JQKN01000002_gene2477	8.570000000000001e-79	243.0	COG0577@1|root,arCOG02312@2157|Archaea	2157|Archaea	V	ABC-type antimicrobial peptide transport system, permease component	abcS-2	GO:0005575,GO:0005623,GO:0005886,GO:0016020,GO:0044464,GO:0071944	-	ko:K02004	-	M00258	-	-	ko00000,ko00002,ko02000	3.A.1	-	-	FtsX,MacB_PCD
	NODE_2144_length_7000_cov_1.266259_7	386456.JQKN01000002_gene2478	1.54e-87	264.0	COG1136@1|root,arCOG00922@2157|Archaea,2XUH3@28890|Euryarchaeota	28890|Euryarchaeota	E	ABC-type antimicrobial peptide transport system, ATPase component	yvrO-2	-	-	ko:K02003	-	M00258	-	-	ko00000,ko00002,ko02000	3.A.1	-	-	ABC_tran
	NODE_2144_length_7000_cov_1.266259_8	386456.JQKN01000002_gene2463	1.06e-76	233.0	arCOG06468@1|root,arCOG06468@2157|Archaea	2157|Archaea	C	Transglutaminase-like superfamily	-	-	-	-	-	-	-	-	-	-	-	-	-
	NODE_2144_length_7000_cov_1.266259_9	386456.JQKN01000002_gene2895	5.4600000000000005e-64	197.0	COG0346@1|root,arCOG02708@2157|Archaea	2157|Archaea	E	COG0346 Lactoylglutathione lyase and related lyases	-	-	4.4.1.5	ko:K01759	ko00620,map00620	-	R02530	RC00004,RC00740	ko00000,ko00001,ko01000	-	-	-	Glyoxalase,Glyoxalase_4
	NODE_2144_length_7000_cov_1.266259_11	386456.JQKN01000002_gene2894	9.94e-109	331.0	COG1193@1|root,arCOG02895@2157|Archaea,2XT51@28890|Euryarchaeota,23NQB@183925|Methanobacteria	183925|Methanobacteria	L	Has ATPase and non-specific DNA-binding activities	mutS2	-	-	ko:K07456	ko03430,map03430	-	-	-	ko00000,ko00001,ko03400	-	-	-	HHH_5,MutS_V
	NODE_2043_length_7356_cov_1.678517_2	1121445.ATUZ01000018_gene2414	5.990000000000001e-27	111.0	2DPHF@1|root,33237@2|Bacteria,1R4GY@1224|Proteobacteria,435JT@68525|delta/epsilon subdivisions,2WZY2@28221|Deltaproteobacteria,2M8FU@213115|Desulfovibrionales	28221|Deltaproteobacteria	S	L-2-amino-thiazoline-4-carboxylic acid hydrolase	-	-	-	-	-	-	-	-	-	-	-	-	ATC_hydrolase
	NODE_2043_length_7356_cov_1.678517_3	386456.JQKN01000001_gene1633	7.3e-52	164.0	arCOG11555@1|root,arCOG11555@2157|Archaea	2157|Archaea	S	Protein of unknown function (DUF3892)	-	-	-	-	-	-	-	-	-	-	-	-	DUF3892
	NODE_2043_length_7356_cov_1.678517_4	1321778.HMPREF1982_03455	1.16e-14	76.3	COG2020@1|root,COG2020@2|Bacteria,1VKIT@1239|Firmicutes,24D8X@186801|Clostridia	186801|Clostridia	O	PFAM Isoprenylcysteine carboxyl methyltransferase	-	-	-	-	-	-	-	-	-	-	-	-	PEMT
	NODE_2043_length_7356_cov_1.678517_5	877455.Metbo_2003	8.089999999999999e-104	306.0	COG3371@1|root,arCOG02008@2157|Archaea,2XWKR@28890|Euryarchaeota	28890|Euryarchaeota	S	Protein of unknown function (DUF998)	-	-	-	-	-	-	-	-	-	-	-	-	DUF998
	NODE_2043_length_7356_cov_1.678517_6	386456.JQKN01000001_gene2308	3.0200000000000003e-109	321.0	COG0491@1|root,arCOG00504@2157|Archaea	2157|Archaea	S	COG0491 Zn-dependent hydrolases, including glyoxylases	-	-	-	-	-	-	-	-	-	-	-	-	Lactamase_B
	NODE_2043_length_7356_cov_1.678517_9	1220534.B655_2403	2.89e-82	248.0	COG2128@1|root,arCOG06151@2157|Archaea	2157|Archaea	S	alkylhydroperoxidase AhpD family core	-	-	-	-	-	-	-	-	-	-	-	-	CMD
	NODE_2043_length_7356_cov_1.678517_10	1220534.B655_2403	1.92e-13	67.8	COG2128@1|root,arCOG06151@2157|Archaea	2157|Archaea	S	alkylhydroperoxidase AhpD family core	-	-	-	-	-	-	-	-	-	-	-	-	CMD
	NODE_2043_length_7356_cov_1.678517_11	1220534.B655_1545	3.12e-118	352.0	COG2081@1|root,arCOG00575@2157|Archaea,2XWX6@28890|Euryarchaeota,23NYK@183925|Methanobacteria	183925|Methanobacteria	S	HI0933-like protein	-	-	-	ko:K07007	-	-	-	-	ko00000	-	-	-	HI0933_like
	NODE_2039_length_7363_cov_6.955362_1	1122134.KB893650_gene548	6.05e-67	211.0	COG0194@1|root,COG0194@2|Bacteria,1MW92@1224|Proteobacteria,1RN09@1236|Gammaproteobacteria,1XJ5P@135619|Oceanospirillales	135619|Oceanospirillales	F	Essential for recycling GMP and indirectly, cGMP	gmk	-	2.7.4.8	ko:K00942	ko00230,ko01100,map00230,map01100	M00050	R00332,R02090	RC00002	ko00000,ko00001,ko00002,ko01000	-	-	-	Guanylate_kin
	NODE_2039_length_7363_cov_6.955362_2	1415778.JQMM01000001_gene633	4.100000000000001e-80	251.0	COG1561@1|root,COG1561@2|Bacteria,1MWRA@1224|Proteobacteria,1RMAB@1236|Gammaproteobacteria,1J4QV@118884|unclassified Gammaproteobacteria	1236|Gammaproteobacteria	S	stress-induced protein	yicC	GO:0000175,GO:0003674,GO:0003824,GO:0004518,GO:0004527,GO:0004532,GO:0004540,GO:0005575,GO:0005622,GO:0005623,GO:0005737,GO:0005829,GO:0006139,GO:0006401,GO:0006725,GO:0006807,GO:0008150,GO:0008152,GO:0008408,GO:0009022,GO:0009056,GO:0009057,GO:0009987,GO:0016070,GO:0016072,GO:0016075,GO:0016740,GO:0016772,GO:0016779,GO:0016787,GO:0016788,GO:0016796,GO:0016896,GO:0019439,GO:0034641,GO:0034655,GO:…	-	-	-	-	-	-	-	-	-	-	DUF1732,YicC_N
	NODE_2039_length_7363_cov_6.955362_3	243233.MCA0321	3.7000000000000003e-122	355.0	COG0708@1|root,COG0708@2|Bacteria,1MVII@1224|Proteobacteria,1RN4H@1236|Gammaproteobacteria,1XEVR@135618|Methylococcales	135618|Methylococcales	L	Endonuclease/Exonuclease/phosphatase family	-	-	3.1.11.2	ko:K01142	ko03410,map03410	-	-	-	ko00000,ko00001,ko01000,ko03400	-	-	-	Exo_endo_phos
	NODE_2039_length_7363_cov_6.955362_4	999141.GME_10261	7.08e-101	300.0	COG0689@1|root,COG0689@2|Bacteria,1MVFZ@1224|Proteobacteria,1RNTB@1236|Gammaproteobacteria,1XI8X@135619|Oceanospirillales	135619|Oceanospirillales	J	Phosphorolytic exoribonuclease that removes nucleotide residues following the -CCA terminus of tRNA and adds nucleotides to the ends of RNA molecules by using nucleoside diphosphates as substrates	rph	-	2.7.7.56	ko:K00989	-	-	-	-	ko00000,ko01000,ko03016	-	-	-	RNase_PH,RNase_PH_C
	NODE_2039_length_7363_cov_6.955362_5	105559.Nwat_3050	6.56e-185	544.0	COG1109@1|root,COG1109@2|Bacteria,1MUA5@1224|Proteobacteria,1RMU8@1236|Gammaproteobacteria,1WXCY@135613|Chromatiales	135613|Chromatiales	G	phosphoglucomutase phosphomannomutase alpha beta alpha domain I	-	-	5.4.2.2,5.4.2.8	ko:K15778	ko00010,ko00030,ko00051,ko00052,ko00230,ko00500,ko00520,ko00521,ko01100,ko01110,ko01120,ko01130,map00010,map00030,map00051,map00052,map00230,map00500,map00520,map00521,map01100,map01110,map01120,map01130	M00114	R00959,R01057,R01818,R08639	RC00408	ko00000,ko00001,ko00002,ko01000	-	-	-	PGM_PMM_I,PGM_PMM_II,PGM_PMM_III,PGM_PMM_IV
	NODE_2039_length_7363_cov_6.955362_6	717774.Marme_0508	3.74e-67	207.0	COG0756@1|root,COG0756@2|Bacteria,1RA7P@1224|Proteobacteria,1S233@1236|Gammaproteobacteria,1XJP4@135619|Oceanospirillales	135619|Oceanospirillales	F	This enzyme is involved in nucleotide metabolism it produces dUMP, the immediate precursor of thymidine nucleotides and it decreases the intracellular concentration of dUTP so that uracil cannot be incorporated into DNA	dut	-	3.6.1.23	ko:K01520	ko00240,ko00983,ko01100,map00240,map00983,map01100	M00053	R02100,R11896	RC00002	ko00000,ko00001,ko00002,ko01000,ko03400	-	-	-	dUTPase
	NODE_2039_length_7363_cov_6.955362_7	1117318.PRUB_06855	1.7e-07	58.5	2C2AA@1|root,2ZAYY@2|Bacteria,1RD8I@1224|Proteobacteria,1RZE6@1236|Gammaproteobacteria,2Q2Q3@267888|Pseudoalteromonadaceae	1236|Gammaproteobacteria	S	Enterobacterial TraT complement resistance protein	ylpA	-	-	-	-	-	-	-	-	-	-	-	TraT
	NODE_2039_length_7363_cov_6.955362_8	717774.Marme_0512	1.29e-34	119.0	COG0227@1|root,COG0227@2|Bacteria,1MZ57@1224|Proteobacteria,1S8UG@1236|Gammaproteobacteria,1XKMF@135619|Oceanospirillales	135619|Oceanospirillales	J	Belongs to the bacterial ribosomal protein bL28 family	rpmB	-	-	ko:K02902	ko03010,map03010	M00178	-	-	br01610,ko00000,ko00001,ko00002,ko03011	-	-	-	Ribosomal_L28
	NODE_2039_length_7363_cov_6.955362_9	336407.RBE_1379	2.32e-10	57.0	COG0267@1|root,COG0267@2|Bacteria,1N6QV@1224|Proteobacteria,2UF4D@28211|Alphaproteobacteria,47FT5@766|Rickettsiales	766|Rickettsiales	J	Belongs to the bacterial ribosomal protein bL33 family	rpmG	-	-	ko:K02913	ko03010,map03010	M00178	-	-	br01610,ko00000,ko00001,ko00002,ko03011	-	-	-	Ribosomal_L33
	NODE_2037_length_7367_cov_1.377072_1	868131.MSWAN_1545	4.9e-50	170.0	COG0426@1|root,arCOG00509@2157|Archaea,2XSUD@28890|Euryarchaeota,23PC4@183925|Methanobacteria	183925|Methanobacteria	C	PFAM Flavodoxin nitric oxide synthase	-	-	1.5.3.22	ko:K19817	-	-	-	-	ko00000,ko01000	-	-	-	Flavodoxin_1,Lactamase_B
	NODE_2037_length_7367_cov_1.377072_2	386456.JQKN01000004_gene221	7.4e-33	117.0	COG0428@1|root,arCOG00576@2157|Archaea	2157|Archaea	P	divalent heavy-metal cations transporter	-	-	-	ko:K07238	-	-	-	-	ko00000,ko02000	2.A.5.5	-	-	-
	NODE_2037_length_7367_cov_1.377072_3	868131.MSWAN_0759	1.95e-65	207.0	COG0428@1|root,arCOG00576@2157|Archaea,2XX28@28890|Euryarchaeota	28890|Euryarchaeota	P	divalent heavy-metal cations transporter	-	-	-	ko:K07238	-	-	-	-	ko00000,ko02000	2.A.5.5	-	-	-
	NODE_2037_length_7367_cov_1.377072_4	386456.JQKN01000004_gene219	9.67e-60	188.0	arCOG03726@1|root,arCOG03726@2157|Archaea	2157|Archaea	-	-	-	-	-	-	-	-	-	-	-	-	-	-	H2O2_YaaD
	NODE_2037_length_7367_cov_1.377072_5	386456.JQKN01000004_gene216	2.7e-129	373.0	COG1408@1|root,arCOG01156@2157|Archaea,2XV0X@28890|Euryarchaeota,23NT4@183925|Methanobacteria	183925|Methanobacteria	S	Calcineurin-like phosphoesterase	-	-	-	ko:K07098	-	-	-	-	ko00000	-	-	-	Metallophos
	NODE_2037_length_7367_cov_1.377072_7	386456.JQKN01000004_gene214	1.2899999999999999e-89	273.0	COG2021@1|root,arCOG00627@2157|Archaea,2XWQK@28890|Euryarchaeota,23NYY@183925|Methanobacteria	183925|Methanobacteria	E	alpha/beta hydrolase fold	-	-	2.3.1.31	ko:K00641	ko00270,ko01100,ko01130,map00270,map01100,map01130	-	R01776	RC00004,RC00041	ko00000,ko00001,ko01000	-	-	-	Abhydrolase_1
	NODE_2037_length_7367_cov_1.377072_8	877455.Metbo_1391	2.27e-69	213.0	COG0537@1|root,arCOG00419@2157|Archaea	2157|Archaea	FG	COG0537 Diadenosine tetraphosphate (Ap4A) hydrolase and other HIT family	-	-	2.7.7.53	ko:K19710	ko00230,map00230	-	R00126,R01618	RC00002,RC02753,RC02795	ko00000,ko00001,ko01000	-	-	-	HIT
	NODE_2037_length_7367_cov_1.377072_9	868131.MSWAN_0772	2.7e-90	272.0	COG0500@1|root,arCOG04855@2157|Archaea,2XXQX@28890|Euryarchaeota	28890|Euryarchaeota	Q	methyltransferase activity	-	-	-	-	-	-	-	-	-	-	-	-	-
	NODE_2037_length_7367_cov_1.377072_10	386456.JQKN01000005_gene471	1.29e-24	100.0	COG3945@1|root,arCOG01471@2157|Archaea	2157|Archaea	S	Hemerythrin HHE cation binding	-	-	-	ko:K07322	-	-	-	-	ko00000	-	-	-	Hemerythrin,PRC,ScdA_N
	NODE_2037_length_7367_cov_1.377072_12	386456.JQKN01000004_gene189	1.6e-35	122.0	arCOG03597@1|root,arCOG03597@2157|Archaea	386456.JQKN01000004_gene189|-	S	Protein of unknown function (DUF2769)	-	-	-	-	-	-	-	-	-	-	-	-	-
	NODE_2025_length_7422_cov_3.820288_1	386456.JQKN01000008_gene1554	8.3e-192	538.0	arCOG07615@1|root,arCOG07615@2157|Archaea,2XW95@28890|Euryarchaeota,23NVJ@183925|Methanobacteria	183925|Methanobacteria	M	Related to UDP-N-acetylglucosamine LPS N-acetylglucosamine transferase	-	-	2.4.1.227	ko:K02563	ko00550,ko01100,ko01502,ko04112,map00550,map01100,map01502,map04112	-	R05032,R05662	RC00005,RC00049	ko00000,ko00001,ko01000,ko01011	-	GT28	-	Glyco_trans_1_4,Glyco_transf_28
	NODE_2025_length_7422_cov_3.820288_2	868131.MSWAN_0093	1.72e-05	48.5	arCOG10898@1|root,arCOG10898@2157|Archaea	2157|Archaea	-	-	-	-	-	-	-	-	-	-	-	-	-	-	-
	NODE_2025_length_7422_cov_3.820288_3	386456.JQKN01000008_gene1563	2.34e-206	583.0	COG1249@1|root,arCOG01068@2157|Archaea,2XTXN@28890|Euryarchaeota,23NTS@183925|Methanobacteria	183925|Methanobacteria	C	Pyridine nucleotide-disulphide oxidoreductase	-	-	1.8.1.4	ko:K00382	ko00010,ko00020,ko00260,ko00280,ko00620,ko00630,ko00640,ko01100,ko01110,ko01120,ko01130,ko01200,map00010,map00020,map00260,map00280,map00620,map00630,map00640,map01100,map01110,map01120,map01130,map01200	M00009,M00011,M00036,M00307,M00532	R00209,R01221,R01698,R03815,R07618,R08549	RC00004,RC00022,RC00583,RC02742,RC02833,RC02834	br01601,ko00000,ko00001,ko00002,ko01000,ko04147	-	-	-	Pyr_redox_2
	NODE_2025_length_7422_cov_3.820288_6	386456.JQKN01000008_gene1568	4.76e-90	266.0	COG2150@1|root,arCOG02316@2157|Archaea,2XWH9@28890|Euryarchaeota,23P42@183925|Methanobacteria	183925|Methanobacteria	K	regulator of amino acid metabolism, contains ACT domain	trpY	-	-	ko:K07103	-	-	-	-	ko00000	-	-	-	-
	NODE_2025_length_7422_cov_3.820288_7	1268635.Loa_00176	1.81e-79	262.0	COG3593@1|root,COG3593@2|Bacteria	2|Bacteria	L	DNA synthesis involved in DNA repair	-	-	-	-	-	-	-	-	-	-	-	-	AAA_15,AAA_21,DUF4435
	NODE_2025_length_7422_cov_3.820288_8	1268635.Loa_00176	5.27e-21	100.0	COG3593@1|root,COG3593@2|Bacteria	2|Bacteria	L	DNA synthesis involved in DNA repair	-	-	-	-	-	-	-	-	-	-	-	-	AAA_15,AAA_21,DUF4435
	NODE_1988_length_7592_cov_1.185532_3	868131.MSWAN_1091	6.39e-52	164.0	COG0640@1|root,arCOG01681@2157|Archaea	2157|Archaea	K	regulatory protein, arsR	-	-	-	-	-	-	-	-	-	-	-	-	HTH_20
	NODE_1988_length_7592_cov_1.185532_4	290402.Cbei_3563	1.4299999999999998e-52	170.0	COG0716@1|root,COG0716@2|Bacteria,1V72U@1239|Firmicutes,24JNK@186801|Clostridia,36IZ8@31979|Clostridiaceae	186801|Clostridia	C	Flavodoxin domain	-	-	-	-	-	-	-	-	-	-	-	-	Flavodoxin_3,Flavodoxin_5
	NODE_1988_length_7592_cov_1.185532_5	1220534.B655_0119	2.48e-70	219.0	COG0778@1|root,arCOG00288@2157|Archaea,2Y49S@28890|Euryarchaeota,23PNU@183925|Methanobacteria	183925|Methanobacteria	C	Putative TM nitroreductase	-	-	-	-	-	-	-	-	-	-	-	-	TM1586_NiRdase
	NODE_1988_length_7592_cov_1.185532_7	386456.JQKN01000012_gene1071	1.09e-219	612.0	COG1453@1|root,arCOG01624@2157|Archaea,2XVC4@28890|Euryarchaeota,23NKF@183925|Methanobacteria	183925|Methanobacteria	C	PFAM Aldo keto reductase	-	-	-	ko:K07079	-	-	-	-	ko00000	-	-	-	Aldo_ket_red,Fer4_17
	NODE_1988_length_7592_cov_1.185532_8	386456.JQKN01000012_gene1070	7.64e-104	306.0	arCOG08019@1|root,arCOG08019@2157|Archaea	2157|Archaea	S	Domain of unknown function (DUF4332)	-	-	-	-	-	-	-	-	-	-	-	-	DUF4332
	NODE_1988_length_7592_cov_1.185532_9	386456.JQKN01000012_gene1068	5.36e-63	196.0	COG1846@1|root,arCOG03182@2157|Archaea,2Y1PW@28890|Euryarchaeota	28890|Euryarchaeota	K	PFAM regulatory protein, MarR	-	-	-	-	-	-	-	-	-	-	-	-	MarR
	NODE_1988_length_7592_cov_1.185532_10	386456.JQKN01000012_gene1067	1.69e-121	352.0	arCOG01788@1|root,arCOG01788@2157|Archaea	2157|Archaea	S	PFAM methyltransferase	-	-	-	ko:K15256	-	-	-	-	ko00000,ko01000,ko03016	-	-	-	Methyltransf_25
	NODE_1988_length_7592_cov_1.185532_11	679926.Mpet_2788	4.73e-70	214.0	arCOG06277@1|root,arCOG06277@2157|Archaea	2157|Archaea	-	-	-	-	-	-	-	-	-	-	-	-	-	-	-
	NODE_1976_length_7656_cov_1.232435_1	1509403.GW12_14190	0.0	905.0	COG1086@1|root,COG1086@2|Bacteria,1MWKY@1224|Proteobacteria,1RNQ2@1236|Gammaproteobacteria,3NIY7@468|Moraxellaceae	1236|Gammaproteobacteria	GM	RmlD substrate binding domain	wbpM	-	-	-	-	-	-	-	-	-	-	-	CoA_binding_3,Polysacc_synt_2
	NODE_1976_length_7656_cov_1.232435_2	1509403.GW12_14200	9.28e-254	699.0	COG0399@1|root,COG0399@2|Bacteria,1MUPN@1224|Proteobacteria,1RMCS@1236|Gammaproteobacteria,3NKI3@468|Moraxellaceae	1236|Gammaproteobacteria	E	Belongs to the DegT DnrJ EryC1 family	per	-	-	-	-	-	-	-	-	-	-	-	DegT_DnrJ_EryC1
	NODE_1976_length_7656_cov_1.232435_3	466088.CL42_10050	3.84e-107	314.0	COG0110@1|root,COG0110@2|Bacteria,1MXF9@1224|Proteobacteria,1RSPB@1236|Gammaproteobacteria,3NKV7@468|Moraxellaceae	1236|Gammaproteobacteria	S	maltose O-acetyltransferase activity	-	-	-	-	-	-	-	-	-	-	-	-	Hexapep,Hexapep_2
	NODE_1976_length_7656_cov_1.232435_4	1509403.GW12_14220	1.7400000000000001e-124	356.0	COG2148@1|root,COG2148@2|Bacteria,1MV6W@1224|Proteobacteria,1RMMN@1236|Gammaproteobacteria,3NKCB@468|Moraxellaceae	1236|Gammaproteobacteria	M	Bacterial sugar transferase	epsL	-	-	-	-	-	-	-	-	-	-	-	Bac_transf
	NODE_1976_length_7656_cov_1.232435_5	1509403.GW12_14230	1.76e-220	614.0	COG0438@1|root,COG0438@2|Bacteria,1N0DG@1224|Proteobacteria,1S0D6@1236|Gammaproteobacteria,3NMAJ@468|Moraxellaceae	1236|Gammaproteobacteria	M	Glycosyl transferases group 1	-	-	-	ko:K13004,ko:K21011	ko02025,map02025	-	-	-	ko00000,ko00001,ko01000,ko01003,ko01005	-	GT4	-	Glyco_trans_1_4,Glyco_trans_4_2,Glycos_transf_1
	NODE_1976_length_7656_cov_1.232435_6	1509403.GW12_14240	1.1700000000000001e-173	494.0	COG0438@1|root,COG0438@2|Bacteria,1MU9C@1224|Proteobacteria,1RRU1@1236|Gammaproteobacteria,3NT2I@468|Moraxellaceae	1236|Gammaproteobacteria	M	Glycosyltransferase Family 4	sypP	-	-	-	-	-	-	-	-	-	-	-	Glyco_transf_4,Glycos_transf_1
	NODE_1976_length_7656_cov_1.232435_7	1509403.GW12_14250	4.4e-178	506.0	COG0438@1|root,COG0438@2|Bacteria,1QFQQ@1224|Proteobacteria,1RPY4@1236|Gammaproteobacteria,3NMJE@468|Moraxellaceae	1236|Gammaproteobacteria	M	Glycosyltransferase Family 4	-	-	2.4.1.291	ko:K17248	-	-	-	-	ko00000,ko01000,ko01003	-	GT4	-	Glyco_transf_4,Glycos_transf_1
	NODE_1976_length_7656_cov_1.232435_8	1509403.GW12_14260	1.7e-24	96.7	COG0110@1|root,COG0110@2|Bacteria,1N1VG@1224|Proteobacteria,1SD1R@1236|Gammaproteobacteria	1236|Gammaproteobacteria	S	Hexapeptide repeat of succinyl-transferase	-	-	-	-	-	-	-	-	-	-	-	-	Hexapep_2
	NODE_1886_length_8075_cov_2.873805_1	269797.Mbar_A1034	7.680000000000001e-194	603.0	arCOG03256@1|root,arCOG03256@2157|Archaea,2Y1RB@28890|Euryarchaeota	28890|Euryarchaeota	S	S-layer protein	-	-	-	-	-	-	-	-	-	-	-	-	S-layer
	NODE_1886_length_8075_cov_2.873805_2	1094980.Mpsy_0356	1.83e-212	600.0	COG1541@1|root,arCOG02620@2157|Archaea,2XU3A@28890|Euryarchaeota,2N9EC@224756|Methanomicrobia	224756|Methanomicrobia	H	AMP-binding enzyme C-terminal domain	paaK-3	-	6.2.1.30	ko:K01912	ko00360,ko01120,ko05111,map00360,map01120,map05111	-	R02539	RC00004,RC00014	ko00000,ko00001,ko01000	-	-	-	AMP-binding,AMP-binding_C_2
	NODE_1886_length_8075_cov_2.873805_3	410359.Pcal_2030	9.31e-19	89.7	COG1525@1|root,arCOG03193@2157|Archaea	2157|Archaea	L	PFAM nuclease (SNase domain protein)	-	-	-	-	-	-	-	-	-	-	-	-	-
	NODE_1886_length_8075_cov_2.873805_4	345219.Bcoa_0709	5.2e-06	50.1	2DRGQ@1|root,33BNQ@2|Bacteria,1VPPR@1239|Firmicutes,4HZR8@91061|Bacilli	91061|Bacilli	S	Zinc-ribbon containing domain	-	-	-	-	-	-	-	-	-	-	-	-	DUF1451
	NODE_1877_length_8143_cov_1.400948_1	706587.Desti_2415	5.84e-120	358.0	COG0655@1|root,COG3255@1|root,COG0655@2|Bacteria,COG3255@2|Bacteria,1MYKZ@1224|Proteobacteria,42SN9@68525|delta/epsilon subdivisions,2WP58@28221|Deltaproteobacteria,2MRMQ@213462|Syntrophobacterales	28221|Deltaproteobacteria	I	SCP-2 sterol transfer family	-	-	-	-	-	-	-	-	-	-	-	-	FMN_red,SCP2
	NODE_1877_length_8143_cov_1.400948_2	693661.Arcve_1294	4.5099999999999996e-61	201.0	COG0070@1|root,arCOG00096@2157|Archaea,2XW01@28890|Euryarchaeota,246HR@183980|Archaeoglobi	183980|Archaeoglobi	E	GXGXG motif	-	-	-	-	-	-	-	-	-	-	-	-	GXGXG
	NODE_1877_length_8143_cov_1.400948_3	1121468.AUBR01000046_gene1911	3.84e-273	758.0	COG0069@1|root,COG0069@2|Bacteria,1TQ0B@1239|Firmicutes,248IB@186801|Clostridia,42EK3@68295|Thermoanaerobacterales	186801|Clostridia	C	Belongs to the glutamate synthase family	gltB	-	1.4.1.13,1.4.1.14	ko:K00265	ko00250,ko00910,ko01100,ko01110,ko01120,ko01130,ko01230,map00250,map00910,map01100,map01110,map01120,map01130,map01230	-	R00093,R00114,R00248	RC00006,RC00010,RC02799	ko00000,ko00001,ko01000	-	-	-	Fer4,Fer4_7,Fer4_9,Glu_syn_central,Glu_synthase
	NODE_1877_length_8143_cov_1.400948_4	693661.Arcve_1296	2.93e-59	194.0	COG0067@1|root,arCOG00095@2157|Archaea,2XUF6@28890|Euryarchaeota	28890|Euryarchaeota	E	PFAM Glutamine amidotransferase, class-II	gltB1	-	-	-	-	-	-	-	-	-	-	iAF692.Mbar_A0665	GATase_2,GATase_6,GATase_7
	NODE_1877_length_8143_cov_1.400948_5	693661.Arcve_1296	2.56e-65	214.0	COG0067@1|root,arCOG00095@2157|Archaea,2XUF6@28890|Euryarchaeota	28890|Euryarchaeota	E	PFAM Glutamine amidotransferase, class-II	gltB1	-	-	-	-	-	-	-	-	-	-	iAF692.Mbar_A0665	GATase_2,GATase_6,GATase_7
	NODE_1877_length_8143_cov_1.400948_6	1379281.AVAG01000001_gene249	2.1700000000000002e-222	624.0	COG0174@1|root,COG0174@2|Bacteria,1MUGQ@1224|Proteobacteria,42M7A@68525|delta/epsilon subdivisions,2WJ8P@28221|Deltaproteobacteria,2M8XA@213115|Desulfovibrionales	28221|Deltaproteobacteria	E	PFAM glutamine synthetase catalytic region	glnA	-	6.3.1.2	ko:K01915	ko00220,ko00250,ko00630,ko00910,ko01100,ko01120,ko01230,ko02020,ko04217,ko04724,ko04727,map00220,map00250,map00630,map00910,map01100,map01120,map01230,map02020,map04217,map04724,map04727	-	R00253	RC00010,RC02798	ko00000,ko00001,ko01000,ko04147	-	-	-	Gln-synt_C,Gln-synt_N
	NODE_1877_length_8143_cov_1.400948_7	357808.RoseRS_2451	7.26e-06	55.5	COG4870@1|root,COG4932@1|root,COG5513@1|root,COG4870@2|Bacteria,COG4932@2|Bacteria,COG5513@2|Bacteria,2GA24@200795|Chloroflexi,377PH@32061|Chloroflexia	2|Bacteria	MO	Carboxypeptidase regulatory-like domain	-	-	3.4.22.15	ko:K01365,ko:K02030,ko:K14475	ko04140,ko04142,ko04145,ko04210,ko04612,ko05143,ko05205,ko05323,ko05418,map04140,map04142,map04145,map04210,map04612,map05143,map05205,map05323,map05418	M00236	-	-	ko00000,ko00001,ko00002,ko00537,ko01000,ko01002,ko02000,ko03110	3.A.1.3	-	-	CarboxypepD_reg,Inhibitor_I42,Peptidase_C1
	NODE_1869_length_8169_cov_1.778165_1	386456.JQKN01000004_gene152	5.64e-46	165.0	COG0178@1|root,arCOG04694@2157|Archaea,2XTDU@28890|Euryarchaeota,23NKS@183925|Methanobacteria	183925|Methanobacteria	L	The UvrABC repair system catalyzes the recognition and processing of DNA lesions. UvrA is an ATPase and a DNA-binding protein. A damage recognition complex composed of 2 UvrA and 2 UvrB subunits scans DNA for abnormalities. When the presence of a lesion has been verified by UvrB, the UvrA molecules dissociate	uvrA	-	-	ko:K03701	ko03420,map03420	-	-	-	ko00000,ko00001,ko03400	-	-	-	ABC_tran
	NODE_1869_length_8169_cov_1.778165_2	386456.JQKN01000004_gene154	2.4200000000000003e-132	381.0	COG2006@1|root,arCOG02446@2157|Archaea,2XV9B@28890|Euryarchaeota	28890|Euryarchaeota	S	Domain of unknown function (DUF362)	-	-	-	-	-	-	-	-	-	-	-	-	DUF362
	NODE_1869_length_8169_cov_1.778165_4	386456.JQKN01000004_gene156	5.94e-38	128.0	COG3269@1|root,arCOG01641@2157|Archaea,2Y1N9@28890|Euryarchaeota	28890|Euryarchaeota	S	PFAM Deoxyribonuclease rho motif-related TRAM	-	-	-	-	-	-	-	-	-	-	-	-	TRAM
	NODE_1869_length_8169_cov_1.778165_5	877455.Metbo_0048	7.54e-84	263.0	COG0477@1|root,arCOG02682@2157|Archaea,2XWP6@28890|Euryarchaeota,23PB6@183925|Methanobacteria	183925|Methanobacteria	G	Sugar (and other) transporter	-	-	-	-	-	-	-	-	-	-	-	-	-
	NODE_1869_length_8169_cov_1.778165_6	877455.Metbo_0048	1.18e-63	207.0	COG0477@1|root,arCOG02682@2157|Archaea,2XWP6@28890|Euryarchaeota,23PB6@183925|Methanobacteria	183925|Methanobacteria	G	Sugar (and other) transporter	-	-	-	-	-	-	-	-	-	-	-	-	-
	NODE_1869_length_8169_cov_1.778165_7	634498.mru_1002	7.22e-10	59.7	COG0477@1|root,arCOG02682@2157|Archaea,2XWP6@28890|Euryarchaeota,23PB6@183925|Methanobacteria	183925|Methanobacteria	G	Sugar (and other) transporter	-	-	-	-	-	-	-	-	-	-	-	-	-
	NODE_1869_length_8169_cov_1.778165_8	877455.Metbo_1026	2.29e-25	95.1	arCOG02240@1|root,arCOG02240@2157|Archaea,2Y1EC@28890|Euryarchaeota,23P8T@183925|Methanobacteria	183925|Methanobacteria	S	Tautomerase enzyme	-	-	5.3.2.6	ko:K01821	ko00362,ko00621,ko00622,ko01100,ko01120,ko01220,map00362,map00621,map00622,map01100,map01120,map01220	M00569	R03966,R05389	RC01040,RC01355	ko00000,ko00001,ko00002,ko01000	-	-	-	Tautomerase
	NODE_1869_length_8169_cov_1.778165_9	386456.JQKN01000004_gene158	1e-118	343.0	COG2249@1|root,arCOG02577@2157|Archaea,2XXMK@28890|Euryarchaeota	28890|Euryarchaeota	S	Flavodoxin-like fold	-	-	1.6.5.2	ko:K00355	ko00130,ko01110,ko05200,ko05225,ko05418,map00130,map01110,map05200,map05225,map05418	-	R02964,R03643,R03816	RC00819	ko00000,ko00001,ko01000	-	-	-	Flavodoxin_2
	NODE_1869_length_8169_cov_1.778165_10	386456.JQKN01000004_gene159	2.89e-22	92.8	COG3932@1|root,arCOG10854@2157|Archaea,2Y43I@28890|Euryarchaeota,23PNV@183925|Methanobacteria	183925|Methanobacteria	S	exopolysaccharide synthesis	-	-	-	-	-	-	-	-	-	-	-	-	ExoD
	NODE_1869_length_8169_cov_1.778165_12	386456.JQKN01000004_gene166	4.06e-92	272.0	COG0693@1|root,arCOG00769@2157|Archaea,2XTPH@28890|Euryarchaeota	28890|Euryarchaeota	S	Intracellular protease, PfpI family	-	-	3.5.1.124	ko:K05520	-	-	-	-	ko00000,ko01000,ko01002	-	-	-	DJ-1_PfpI
	NODE_1869_length_8169_cov_1.778165_13	386456.JQKN01000004_gene167	5.12e-141	407.0	COG0784@1|root,arCOG02350@1|root,arCOG02350@2157|Archaea,arCOG02386@2157|Archaea	2157|Archaea	T	response regulator, receiver	-	-	-	-	-	-	-	-	-	-	-	-	BAT,GAF_2,HATPase_c,HTH_10,HisKA,HisKA_2,PAS,PAS_3,PAS_4,PAS_9,Response_reg
	NODE_1869_length_8169_cov_1.778165_14	386456.JQKN01000004_gene168	1.68e-103	308.0	COG3359@1|root,arCOG03130@2157|Archaea,2Y790@28890|Euryarchaeota,23PGT@183925|Methanobacteria	183925|Methanobacteria	L	RNase_H superfamily	-	-	-	ko:K07502	-	-	-	-	ko00000	-	-	-	RNase_H_2
	NODE_1852_length_8258_cov_1.723158_1	877455.Metbo_2000	1.16e-13	67.8	COG4085@1|root,arCOG05052@2157|Archaea	2157|Archaea	L	PFAM nucleic acid binding, OB-fold, tRNA helicase-type	-	-	-	ko:K06931	-	-	-	-	ko00000	-	-	-	Ada_Zn_binding,tRNA_anti-codon
	NODE_1852_length_8258_cov_1.723158_2	386456.JQKN01000001_gene1660	4.72e-106	312.0	COG0310@1|root,arCOG02248@2157|Archaea,2XU13@28890|Euryarchaeota,23NTM@183925|Methanobacteria	183925|Methanobacteria	P	Part of the energy-coupling factor (ECF) transporter complex CbiMNOQ involved in cobalt import	cbiM	-	-	ko:K02007	ko02010,map02010	M00245,M00246	-	-	ko00000,ko00001,ko00002,ko02000	3.A.1.18,3.A.1.22,3.A.1.23	-	-	CbiM
	NODE_1852_length_8258_cov_1.723158_3	386456.JQKN01000001_gene1661	9.980000000000001e-27	100.0	COG1930@1|root,arCOG04384@2157|Archaea,2XZ10@28890|Euryarchaeota	28890|Euryarchaeota	P	Part of the energy-coupling factor (ECF) transporter complex CbiMNOQ involved in cobalt import	cbiN	GO:0000041,GO:0005575,GO:0005623,GO:0005886,GO:0006810,GO:0006811,GO:0006812,GO:0006824,GO:0008150,GO:0016020,GO:0016021,GO:0030001,GO:0031224,GO:0032991,GO:0043190,GO:0044425,GO:0044459,GO:0044464,GO:0051179,GO:0051234,GO:0071944,GO:0072511,GO:0098533,GO:0098796,GO:0098797,GO:1902494,GO:1902495,GO:1904949,GO:1990351	-	ko:K02009	ko02010,map02010	M00245,M00246	-	-	ko00000,ko00001,ko00002,ko02000	3.A.1.18	-	-	CbiN
	NODE_1852_length_8258_cov_1.723158_4	386456.JQKN01000001_gene1662	5.81e-114	335.0	COG0619@1|root,arCOG02249@2157|Archaea,2XUZN@28890|Euryarchaeota,23P2W@183925|Methanobacteria	183925|Methanobacteria	P	Cobalt transport protein	cbiQ2	-	-	ko:K02008	ko02010,map02010	M00245,M00246	-	-	ko00000,ko00001,ko00002,ko02000	3.A.1.18,3.A.1.22,3.A.1.23	-	-	CbiQ
	NODE_1852_length_8258_cov_1.723158_5	386456.JQKN01000001_gene1663	1.15e-175	492.0	COG1122@1|root,arCOG00203@2157|Archaea,2Y7N4@28890|Euryarchaeota,23NVA@183925|Methanobacteria	183925|Methanobacteria	P	ATP-binding (A) component of a common energy-coupling factor (ECF) ABC-transporter complex. Unlike classic ABC transporters this ECF transporter provides the energy necessary to transport a number of different substrates	ecfA	-	-	ko:K02006	ko02010,map02010	M00245,M00246	-	-	ko00000,ko00001,ko00002,ko02000	3.A.1.18,3.A.1.22,3.A.1.23	-	-	ABC_tran
	NODE_1852_length_8258_cov_1.723158_6	386456.JQKN01000001_gene1664	9.039999999999999e-90	265.0	COG1731@1|root,arCOG01322@2157|Archaea,2XX0K@28890|Euryarchaeota,23P01@183925|Methanobacteria	183925|Methanobacteria	H	Riboflavin synthase	ribC	-	2.5.1.9	ko:K00793	ko00740,ko01100,ko01110,map00740,map01100,map01110	M00125	R00066	RC00958,RC00960	ko00000,ko00001,ko00002,ko01000	-	-	-	DMRL_synthase
	NODE_1852_length_8258_cov_1.723158_7	593750.Metfor_1959	1.1999999999999999e-54	191.0	COG0642@1|root,COG0784@1|root,arCOG02352@1|root,arCOG02352@2157|Archaea,arCOG06193@2157|Archaea,arCOG06537@2157|Archaea	2157|Archaea	T	response regulator, receiver	-	-	-	-	-	-	-	-	-	-	-	-	HATPase_c,HisKA_2,PAS,PAS_3,PAS_4,PAS_9,Response_reg
	NODE_1852_length_8258_cov_1.723158_8	1220534.B655_2427	3.33e-46	172.0	COG0784@1|root,COG2202@1|root,COG2203@1|root,arCOG04001@1|root,arCOG02361@2157|Archaea,arCOG04001@2157|Archaea,arCOG06537@2157|Archaea,arCOG06918@2157|Archaea	2157|Archaea	T	Pas domain	-	-	-	-	-	-	-	-	-	-	-	-	BAT,GAF_2,GAF_3,HATPase_c,HTH_10,HisKA,HisKA_2,PAS,PAS_3,PAS_4,PAS_8,PAS_9,PocR,Response_reg
	NODE_1852_length_8258_cov_1.723158_9	386456.JQKN01000001_gene1666	5.17e-32	126.0	COG0784@1|root,COG3920@1|root,arCOG02348@1|root,arCOG02352@1|root,arCOG02335@2157|Archaea,arCOG02348@2157|Archaea,arCOG02352@2157|Archaea,arCOG06537@2157|Archaea	2157|Archaea	T	response regulator, receiver	-	-	-	-	-	-	-	-	-	-	-	-	GAF,GAF_2,HATPase_c,HisKA_2,PAS,PAS_3,PAS_4,PAS_9,Response_reg
	NODE_1852_length_8258_cov_1.723158_10	386456.JQKN01000001_gene1666	1.13e-150	463.0	COG0784@1|root,COG3920@1|root,arCOG02348@1|root,arCOG02352@1|root,arCOG02335@2157|Archaea,arCOG02348@2157|Archaea,arCOG02352@2157|Archaea,arCOG06537@2157|Archaea	2157|Archaea	T	response regulator, receiver	-	-	-	-	-	-	-	-	-	-	-	-	GAF,GAF_2,HATPase_c,HisKA_2,PAS,PAS_3,PAS_4,PAS_9,Response_reg
	NODE_1852_length_8258_cov_1.723158_11	386456.JQKN01000001_gene1668	4.62e-63	194.0	COG0599@1|root,arCOG02148@2157|Archaea,2XYN2@28890|Euryarchaeota,23PSX@183925|Methanobacteria	183925|Methanobacteria	S	carboxymuconolactone decarboxylase	-	-	-	-	-	-	-	-	-	-	-	-	CMD
	NODE_1813_length_8459_cov_0.837134_1	386456.JQKN01000008_gene1373	0.0	1188.0	COG0525@1|root,arCOG00808@2157|Archaea,2XSXQ@28890|Euryarchaeota,23NN8@183925|Methanobacteria	183925|Methanobacteria	J	amino acids such as threonine, to avoid such errors, it has a posttransfer editing activity that hydrolyzes mischarged Thr-tRNA(Val) in a tRNA-dependent manner	valS	-	6.1.1.9	ko:K01873	ko00970,map00970	M00359,M00360	R03665	RC00055,RC00523	ko00000,ko00001,ko00002,ko01000,ko01007,ko03016	-	-	-	Anticodon_1,tRNA-synt_1
	NODE_1813_length_8459_cov_0.837134_2	386456.JQKN01000008_gene1374	1.75e-236	658.0	COG0128@1|root,arCOG04134@2157|Archaea,2XTC3@28890|Euryarchaeota,23NPJ@183925|Methanobacteria	183925|Methanobacteria	E	Catalyzes the transfer of the enolpyruvyl moiety of phosphoenolpyruvate (PEP) to the 5-hydroxyl of shikimate-3- phosphate (S3P) to produce enolpyruvyl shikimate-3-phosphate and inorganic phosphate	aroA	-	2.5.1.19	ko:K00800	ko00400,ko01100,ko01110,ko01130,ko01230,map00400,map01100,map01110,map01130,map01230	M00022	R03460	RC00350	ko00000,ko00001,ko00002,ko01000	-	-	-	EPSP_synthase
	NODE_1813_length_8459_cov_0.837134_3	386456.JQKN01000008_gene1375	2.04e-65	204.0	COG2229@1|root,arCOG00362@2157|Archaea,2XZ9P@28890|Euryarchaeota	28890|Euryarchaeota	S	TIGRFAM Small GTP-binding protein	-	-	-	ko:K06945	-	-	-	-	ko00000	-	-	-	GTP_EFTU
	NODE_1813_length_8459_cov_0.837134_4	386456.JQKN01000008_gene1376	5.2700000000000005e-166	470.0	arCOG06102@1|root,arCOG06102@2157|Archaea,2Y5W7@28890|Euryarchaeota	28890|Euryarchaeota	V	Exonuclease V - a 5' deoxyribonuclease	-	-	-	-	-	-	-	-	-	-	-	-	Exo5
	NODE_1813_length_8459_cov_0.837134_5	386456.JQKN01000008_gene1377	3.54e-126	362.0	COG0177@1|root,arCOG00459@2157|Archaea,2XTY1@28890|Euryarchaeota,23NY0@183925|Methanobacteria	183925|Methanobacteria	L	DNA repair enzyme that has both DNA N-glycosylase activity and AP-lyase activity. The DNA N-glycosylase activity releases various damaged pyrimidines from DNA by cleaving the N- glycosidic bond, leaving an AP (apurinic apyrimidinic) site. The AP-lyase activity cleaves the phosphodiester bond 3' to the AP site by a beta-elimination, leaving a 3'-terminal unsaturated sugar and a product with a term…	nth	-	4.2.99.18	ko:K10773	ko03410,map03410	-	-	-	ko00000,ko00001,ko01000,ko03400	-	-	-	EndIII_4Fe-2S,HhH-GPD
	NODE_1813_length_8459_cov_0.837134_6	56110.Oscil6304_2312	2.55e-146	431.0	COG1253@1|root,COG1253@2|Bacteria,1G16U@1117|Cyanobacteria,1H75A@1150|Oscillatoriales	1117|Cyanobacteria	S	PFAM CBS domain	-	-	-	ko:K03699	-	-	-	-	ko00000,ko02042	-	-	-	CBS,CorC_HlyC,DUF21
	NODE_1813_length_8459_cov_0.837134_7	647113.Metok_1076	0.000648	47.0	COG1855@1|root,arCOG04116@2157|Archaea,2XSZY@28890|Euryarchaeota,23Q2A@183939|Methanococci	183939|Methanococci	V	PFAM PilT protein domain protein	-	GO:0005575,GO:0005618,GO:0005623,GO:0030312,GO:0044464,GO:0071944	-	ko:K06865	-	-	-	-	ko00000	-	-	-	KH_1,PIN,T2SSE
	NODE_1748_length_8812_cov_1.149223_1	386456.JQKN01000009_gene1094	8.160000000000001e-245	677.0	COG0422@1|root,arCOG02741@2157|Archaea,2XTMD@28890|Euryarchaeota,23NMU@183925|Methanobacteria	183925|Methanobacteria	H	Catalyzes the synthesis of the hydroxymethylpyrimidine phosphate (HMP-P) moiety of thiamine from aminoimidazole ribotide (AIR) in a radical S-adenosyl-L-methionine (SAM)-dependent reaction	thiC1	-	4.1.99.17	ko:K03147	ko00730,ko01100,map00730,map01100	M00127	R03472	RC03251,RC03252	ko00000,ko00001,ko00002,ko01000	-	-	-	ThiC_Rad_SAM
	NODE_1748_length_8812_cov_1.149223_2	386456.JQKN01000009_gene1093	0.0	949.0	COG1384@1|root,arCOG00485@2157|Archaea,2XTR5@28890|Euryarchaeota,23NWD@183925|Methanobacteria	183925|Methanobacteria	J	Belongs to the class-I aminoacyl-tRNA synthetase family	lysS	-	6.1.1.6	ko:K04566	ko00970,map00970	M00360	R03658	RC00055,RC00523	ko00000,ko00001,ko00002,ko01000,ko01007,ko03016	-	-	-	tRNA-synt_1f
	NODE_1748_length_8812_cov_1.149223_3	386456.JQKN01000011_gene734	4.41e-165	472.0	COG0531@1|root,arCOG00009@2157|Archaea,2XTX6@28890|Euryarchaeota	28890|Euryarchaeota	E	amino acid	-	-	-	ko:K03294	-	-	-	-	ko00000	2.A.3.2	-	-	AA_permease_2
	NODE_1748_length_8812_cov_1.149223_4	386456.JQKN01000011_gene736	1.69e-71	220.0	arCOG10135@1|root,arCOG10135@2157|Archaea,2Y112@28890|Euryarchaeota	28890|Euryarchaeota	-	-	-	-	-	-	-	-	-	-	-	-	-	-	-
	NODE_1748_length_8812_cov_1.149223_5	386456.JQKN01000011_gene737	1.01e-230	640.0	arCOG10131@1|root,arCOG10131@2157|Archaea,2XWNY@28890|Euryarchaeota	28890|Euryarchaeota	-	-	-	-	-	-	-	-	-	-	-	-	-	-	-
	NODE_1748_length_8812_cov_1.149223_6	645991.Sgly_0152	3.77e-32	128.0	COG1233@1|root,COG1233@2|Bacteria,1TS4A@1239|Firmicutes,249K1@186801|Clostridia,2633J@186807|Peptococcaceae	186801|Clostridia	Q	amine oxidase	-	-	-	-	-	-	-	-	-	-	-	-	Amino_oxidase
	NODE_1748_length_8812_cov_1.149223_7	398512.JQKC01000001_gene2349	3.76e-39	148.0	COG1233@1|root,COG1233@2|Bacteria,1TS4A@1239|Firmicutes,249K1@186801|Clostridia,3WHBS@541000|Ruminococcaceae	186801|Clostridia	Q	Flavin containing amine oxidoreductase	-	-	-	-	-	-	-	-	-	-	-	-	Amino_oxidase,NAD_binding_8
	NODE_1748_length_8812_cov_1.149223_8	926692.AZYG01000096_gene1900	1.16e-19	88.2	COG1233@1|root,COG1233@2|Bacteria,1TS4A@1239|Firmicutes,249K1@186801|Clostridia	186801|Clostridia	Q	FAD dependent oxidoreductase	-	-	-	-	-	-	-	-	-	-	-	-	Amino_oxidase,NAD_binding_8
	NODE_1748_length_8812_cov_1.149223_9	386456.JQKN01000011_gene739	1.17e-88	266.0	COG0778@1|root,arCOG00289@2157|Archaea,2XXHD@28890|Euryarchaeota,23P6W@183925|Methanobacteria	183925|Methanobacteria	C	Nitroreductase family	-	-	-	-	-	-	-	-	-	-	-	-	Fer4,Nitroreductase
	NODE_1748_length_8812_cov_1.149223_10	386456.JQKN01000011_gene739	9.65e-28	107.0	COG0778@1|root,arCOG00289@2157|Archaea,2XXHD@28890|Euryarchaeota,23P6W@183925|Methanobacteria	183925|Methanobacteria	C	Nitroreductase family	-	-	-	-	-	-	-	-	-	-	-	-	Fer4,Nitroreductase
	NODE_1723_length_8921_cov_1.220719_1	386456.JQKN01000007_gene3359	1.91e-265	752.0	COG0210@1|root,arCOG00798@2157|Archaea,2Y7Q4@28890|Euryarchaeota,23NND@183925|Methanobacteria	183925|Methanobacteria	L	UvrD/REP helicase N-terminal domain	-	-	3.6.4.12	ko:K03657	ko03420,ko03430,map03420,map03430	-	-	-	ko00000,ko00001,ko01000,ko03400	-	-	-	UvrD-helicase,UvrD_C
	NODE_1723_length_8921_cov_1.220719_2	386456.JQKN01000007_gene3357	2.08e-201	566.0	COG2232@1|root,arCOG01595@2157|Archaea,2XVAH@28890|Euryarchaeota,23P2I@183925|Methanobacteria	183925|Methanobacteria	S	ATP-grasp domain	-	-	-	ko:K06913	-	-	-	-	ko00000	-	-	-	ATP-grasp_3
	NODE_1723_length_8921_cov_1.220719_3	877455.Metbo_0443	3.52e-09	54.3	arCOG10148@1|root,arCOG10148@2157|Archaea	2157|Archaea	-	-	-	-	-	-	-	-	-	-	-	-	-	-	-
	NODE_1723_length_8921_cov_1.220719_4	386456.JQKN01000007_gene3355	4.59e-63	196.0	COG2083@1|root,arCOG01921@2157|Archaea,2Y13G@28890|Euryarchaeota	28890|Euryarchaeota	S	Belongs to the UPF0216 family	-	-	-	ko:K09737	-	-	-	-	ko00000	-	-	-	DUF61
	NODE_1723_length_8921_cov_1.220719_5	868131.MSWAN_1977	1.81e-42	142.0	arCOG10457@1|root,arCOG10457@2157|Archaea	2157|Archaea	-	-	-	-	-	-	-	-	-	-	-	-	-	-	-
	NODE_1723_length_8921_cov_1.220719_6	386456.JQKN01000007_gene3354	5.019999999999999e-60	187.0	COG1417@1|root,arCOG04850@2157|Archaea	2157|Archaea	S	to GB L77117 SP Q58031 PID 1591324 percent identity	-	-	-	-	-	-	-	-	-	-	-	-	DUF22
	NODE_1723_length_8921_cov_1.220719_7	386456.JQKN01000007_gene3353	7.720000000000001e-121	348.0	COG1394@1|root,arCOG04101@2157|Archaea,2XTQ5@28890|Euryarchaeota,23NYI@183925|Methanobacteria	183925|Methanobacteria	C	Produces ATP from ADP in the presence of a proton gradient across the membrane	atpD	-	-	ko:K02120	ko00190,ko01100,map00190,map01100	M00159	-	-	ko00000,ko00001,ko00002	3.A.2.2,3.A.2.3	-	-	ATP-synt_D
	NODE_1723_length_8921_cov_1.220719_8	386456.JQKN01000007_gene3352	0.0	868.0	COG1156@1|root,arCOG00865@2157|Archaea,2XSYQ@28890|Euryarchaeota,23NSM@183925|Methanobacteria	183925|Methanobacteria	C	Produces ATP from ADP in the presence of a proton gradient across the membrane. The archaeal beta chain is a regulatory subunit	atpB	-	-	ko:K02118	ko00190,ko01100,map00190,map01100	M00159	-	-	ko00000,ko00001,ko00002	3.A.2.2,3.A.2.3	-	-	ATP-synt_ab,ATP-synt_ab_N
	NODE_1723_length_8921_cov_1.220719_9	386456.JQKN01000007_gene3351	0.0	1052.0	COG1155@1|root,arCOG00868@2157|Archaea,2XT8I@28890|Euryarchaeota,23NK7@183925|Methanobacteria	183925|Methanobacteria	C	Produces ATP from ADP in the presence of a proton gradient across the membrane. The archaeal alpha chain is a catalytic subunit	atpA	-	3.6.3.14,3.6.3.15	ko:K02117	ko00190,ko01100,map00190,map01100	M00159	-	-	ko00000,ko00001,ko00002,ko01000	3.A.2.2,3.A.2.3	-	-	ATP-synt_ab,ATP-synt_ab_N,ATP-synt_ab_Xtn
	NODE_1723_length_8921_cov_1.220719_10	386456.JQKN01000007_gene3350	3.29e-14	67.4	COG1436@1|root,arCOG04102@2157|Archaea,2Y1TB@28890|Euryarchaeota,23P7Q@183925|Methanobacteria	183925|Methanobacteria	C	Produces ATP from ADP in the presence of a proton gradient across the membrane	ahaF	-	-	ko:K02122	ko00190,ko01100,map00190,map01100	M00159	-	-	ko00000,ko00001,ko00002	3.A.2.2,3.A.2.3	-	-	ATP-synt_F
	NODE_1703_length_9043_cov_1.284881_2	1304888.ATWF01000001_gene2461	1.78e-77	254.0	COG2244@1|root,COG2244@2|Bacteria,2GGIU@200930|Deferribacteres	200930|Deferribacteres	S	Polysaccharide biosynthesis protein	-	-	-	-	-	-	-	-	-	-	-	-	-
	NODE_1703_length_9043_cov_1.284881_3	1429916.X566_17600	1.62e-39	150.0	COG0399@1|root,COG0399@2|Bacteria	2|Bacteria	E	UDP-4-amino-4-deoxy-L-arabinose aminotransferase	-	-	2.6.1.33	ko:K20429	-	-	R02773	RC00006,RC00781	ko00000,ko01000	-	-	-	DegT_DnrJ_EryC1
	NODE_1703_length_9043_cov_1.284881_4	1429916.X566_17595	1.3900000000000001e-129	394.0	COG0451@1|root,COG0451@2|Bacteria,1NEDD@1224|Proteobacteria,2UHPE@28211|Alphaproteobacteria	28211|Alphaproteobacteria	GM	ADP-glyceromanno-heptose 6-epimerase activity	-	-	-	-	-	-	-	-	-	-	-	-	-
	NODE_1703_length_9043_cov_1.284881_5	1547437.LL06_23205	5.3e-101	315.0	COG0726@1|root,COG0726@2|Bacteria,1R6DC@1224|Proteobacteria	1224|Proteobacteria	G	polysaccharide deacetylase	-	-	-	-	-	-	-	-	-	-	-	-	-
	NODE_1703_length_9043_cov_1.284881_6	1200792.AKYF01000027_gene419	3.79e-132	398.0	COG0367@1|root,COG0367@2|Bacteria,1TRPB@1239|Firmicutes,4HAIP@91061|Bacilli,26QDS@186822|Paenibacillaceae	91061|Bacilli	E	Asparagine synthase	asnH	-	6.3.5.4	ko:K01953	ko00250,ko01100,ko01110,map00250,map01100,map01110	-	R00578	RC00010	ko00000,ko00001,ko01000,ko01002	-	-	-	Asn_synthase,GATase_7
	NODE_1703_length_9043_cov_1.284881_7	1458462.JNLK01000001_gene122	1.86e-59	204.0	COG0367@1|root,COG0367@2|Bacteria,1TRPB@1239|Firmicutes,247YA@186801|Clostridia,27JQE@186928|unclassified Lachnospiraceae	186801|Clostridia	E	Asparagine synthase	asnB	-	6.3.5.4	ko:K01953	ko00250,ko01100,ko01110,map00250,map01100,map01110	-	R00578	RC00010	ko00000,ko00001,ko01000,ko01002	-	-	-	Asn_synthase,GATase_7
	NODE_1703_length_9043_cov_1.284881_8	1304888.ATWF01000001_gene2451	7.04e-69	218.0	COG0463@1|root,COG0463@2|Bacteria,2GGMK@200930|Deferribacteres	200930|Deferribacteres	M	Glycosyl transferase family 2	-	-	2.4.1.83	ko:K00721	ko00510,ko01100,map00510,map01100	-	R01009	RC00005	ko00000,ko00001,ko01000,ko01003	-	GT2	-	Glycos_transf_2
	NODE_1661_length_9288_cov_2.864753_1	1121859.KB890738_gene3085	4.45e-21	92.8	COG3408@1|root,COG3408@2|Bacteria,4NF09@976|Bacteroidetes,47M96@768503|Cytophagia	976|Bacteroidetes	G	Glycogen debranching enzyme	-	-	-	-	-	-	-	-	-	-	-	-	GDE_C,GDE_N
	NODE_1661_length_9288_cov_2.864753_2	1121129.KB903359_gene1233	3.71e-49	169.0	COG0297@1|root,COG0297@2|Bacteria,4PKP8@976|Bacteroidetes,2G0CZ@200643|Bacteroidia,2325F@171551|Porphyromonadaceae	976|Bacteroidetes	G	Starch synthase catalytic domain	-	-	-	-	-	-	-	-	-	-	-	-	Glyco_transf_4,Glyco_transf_5,Glycos_transf_1
	NODE_1661_length_9288_cov_2.864753_3	742817.HMPREF9449_00275	8.650000000000001e-210	607.0	COG3408@1|root,COG3408@2|Bacteria,4NF09@976|Bacteroidetes,2FMEX@200643|Bacteroidia,22X3H@171551|Porphyromonadaceae	976|Bacteroidetes	G	Glycogen debranching enzyme	-	-	-	-	-	-	-	-	-	-	-	-	GDE_C,GDE_N
	NODE_1661_length_9288_cov_2.864753_4	153721.MYP_2490	1.4499999999999997e-104	315.0	COG1216@1|root,COG1216@2|Bacteria,4NEJB@976|Bacteroidetes,47MPS@768503|Cytophagia	976|Bacteroidetes	M	Glycosyl transferase family 2	-	-	-	ko:K07011	-	-	-	-	ko00000	-	-	-	Glycos_transf_2
	NODE_1661_length_9288_cov_2.864753_5	999419.HMPREF1077_02806	9.05e-120	375.0	COG0367@1|root,COG0367@2|Bacteria,4P0XF@976|Bacteroidetes,2FQ9W@200643|Bacteroidia	976|Bacteroidetes	E	Psort location Cytoplasmic, score	-	-	-	-	-	-	-	-	-	-	-	-	Asn_synthase
	NODE_1661_length_9288_cov_2.864753_6	385682.AFSL01000003_gene1904	6.029999999999999e-52	176.0	COG2045@1|root,COG2045@2|Bacteria,4NG1A@976|Bacteroidetes,2FSD1@200643|Bacteroidia,3XKJU@558415|Marinilabiliaceae	976|Bacteroidetes	H	2-phosphosulpholactate phosphatase	comB	-	3.1.3.71	ko:K05979	ko00680,ko01120,map00680,map01120	M00358	R05789	RC00428	ko00000,ko00001,ko00002,ko01000	-	-	-	2-ph_phosp
	NODE_1661_length_9288_cov_2.864753_7	926549.KI421517_gene3817	8.500000000000001e-249	710.0	COG0457@1|root,COG0457@2|Bacteria,4NFIY@976|Bacteroidetes,47MEE@768503|Cytophagia	976|Bacteroidetes	S	Peptidase family M49	-	-	3.4.14.4	ko:K01277	-	-	-	-	ko00000,ko01000,ko01002	-	-	-	Peptidase_M49
	NODE_1661_length_9288_cov_2.864753_8	763034.HMPREF9446_02303	3.4400000000000003e-100	306.0	COG0513@1|root,COG0513@2|Bacteria,4NEVI@976|Bacteroidetes,2FM7Y@200643|Bacteroidia,4ANZ0@815|Bacteroidaceae	976|Bacteroidetes	L	Belongs to the DEAD box helicase family	deaD	-	-	-	-	-	-	-	-	-	-	-	DEAD,Helicase_C
	NODE_1588_length_9726_cov_1.474320_1	1220534.B655_2320	1.28e-67	218.0	COG2239@1|root,arCOG00625@2157|Archaea,2XSUY@28890|Euryarchaeota	28890|Euryarchaeota	P	transporter (mgtE)	-	-	-	ko:K06213	-	-	-	-	ko00000,ko02000	1.A.26.1	-	-	CBS,MgtE,MgtE_N
	NODE_1588_length_9726_cov_1.474320_2	386456.JQKN01000004_gene227	1.6100000000000002e-27	106.0	COG0596@1|root,arCOG01655@2157|Archaea	2157|Archaea	S	Dienelactone hydrolase family	-	-	-	-	-	-	-	-	-	-	-	-	-
	NODE_1588_length_9726_cov_1.474320_3	386456.JQKN01000004_gene227	1.88e-41	143.0	COG0596@1|root,arCOG01655@2157|Archaea	2157|Archaea	S	Dienelactone hydrolase family	-	-	-	-	-	-	-	-	-	-	-	-	-
	NODE_1588_length_9726_cov_1.474320_4	386456.JQKN01000004_gene228	1.7499999999999999e-68	213.0	COG0500@1|root,arCOG01631@2157|Archaea	2157|Archaea	Q	RNA methylase	-	GO:0003674,GO:0003824,GO:0006464,GO:0006479,GO:0006807,GO:0008150,GO:0008152,GO:0008168,GO:0008170,GO:0008213,GO:0008276,GO:0008757,GO:0009987,GO:0016278,GO:0016279,GO:0016740,GO:0016741,GO:0018022,GO:0018193,GO:0018205,GO:0019538,GO:0032259,GO:0036211,GO:0043170,GO:0043412,GO:0043414,GO:0044237,GO:0044238,GO:0044260,GO:0044267,GO:0071704,GO:0140096,GO:1901564	-	-	-	-	-	-	-	-	-	-	CMAS,DOT1,Methyltransf_25,Methyltransf_31,PrmA
	NODE_1588_length_9726_cov_1.474320_5	1220534.B655_1202	2.8000000000000003e-182	523.0	COG0477@1|root,arCOG00143@2157|Archaea,2XUTR@28890|Euryarchaeota,23PFA@183925|Methanobacteria	183925|Methanobacteria	G	PFAM Major Facilitator Superfamily	-	-	-	-	-	-	-	-	-	-	-	-	MFS_1
	NODE_1588_length_9726_cov_1.474320_7	868131.MSWAN_0893	7.07e-07	51.2	COG0212@1|root,arCOG00474@2157|Archaea,2XTN7@28890|Euryarchaeota,23PK3@183925|Methanobacteria	183925|Methanobacteria	H	PFAM 5-formyltetrahydrofolate cyclo-ligase	-	-	6.3.3.2	ko:K01934	ko00670,ko01100,map00670,map01100	-	R02301	RC00183	ko00000,ko00001,ko01000	-	-	-	5-FTHF_cyc-lig
	NODE_1588_length_9726_cov_1.474320_8	1220534.B655_1196	5.03e-06	47.8	COG0212@1|root,arCOG00474@2157|Archaea,2XTN7@28890|Euryarchaeota,23PK3@183925|Methanobacteria	183925|Methanobacteria	H	PFAM 5-formyltetrahydrofolate cyclo-ligase	-	-	6.3.3.2	ko:K01934	ko00670,ko01100,map00670,map01100	-	R02301	RC00183	ko00000,ko00001,ko01000	-	-	-	5-FTHF_cyc-lig
	NODE_1588_length_9726_cov_1.474320_9	386456.JQKN01000004_gene233	1.19e-13	68.9	COG0212@1|root,arCOG00474@2157|Archaea,2XTN7@28890|Euryarchaeota,23PK3@183925|Methanobacteria	183925|Methanobacteria	H	PFAM 5-formyltetrahydrofolate cyclo-ligase	-	-	6.3.3.2	ko:K01934	ko00670,ko01100,map00670,map01100	-	R02301	RC00183	ko00000,ko00001,ko01000	-	-	-	5-FTHF_cyc-lig
	NODE_1588_length_9726_cov_1.474320_11	868131.MSWAN_0889	3.3800000000000004e-66	204.0	COG2193@1|root,arCOG01094@2157|Archaea,2Y3W0@28890|Euryarchaeota	28890|Euryarchaeota	P	Ferritin-like domain	-	-	1.16.3.1	ko:K03594	ko00860,map00860	-	R00078	RC02758	ko00000,ko00001,ko01000	-	-	-	Ferritin
	NODE_1588_length_9726_cov_1.474320_12	386456.JQKN01000005_gene429	1.21e-73	222.0	COG0432@1|root,arCOG04214@2157|Archaea,2XYW0@28890|Euryarchaeota	28890|Euryarchaeota	S	PFAM Uncharacterised protein family UPF0047	-	-	-	-	-	-	-	-	-	-	-	-	UPF0047
	NODE_1588_length_9726_cov_1.474320_13	386456.JQKN01000005_gene430	2.4699999999999998e-82	279.0	COG0642@1|root,arCOG02348@1|root,arCOG02348@2157|Archaea,arCOG02374@2157|Archaea	2157|Archaea	T	PAS fold domain protein	-	-	-	-	-	-	-	-	-	-	-	-	PAS_9,Response_reg
	NODE_1588_length_9726_cov_1.474320_14	386456.JQKN01000007_gene3173	1.57e-108	335.0	COG2202@1|root,arCOG07605@1|root,arCOG06918@2157|Archaea,arCOG07605@2157|Archaea	2157|Archaea	T	Histidine kinase-like ATPases	-	-	-	-	-	-	-	-	-	-	-	-	BAT,GAF,GAF_2,HATPase_c,HTH_10,HisKA,PAS,PAS_3,PAS_4,PAS_9
	NODE_1588_length_9726_cov_1.474320_15	386456.JQKN01000013_gene3001	7.760000000000001e-32	117.0	arCOG03950@1|root,arCOG03950@2157|Archaea	386456.JQKN01000013_gene3001|-	-	-	-	-	-	-	-	-	-	-	-	-	-	-	-
	NODE_1588_length_9726_cov_1.474320_16	386456.JQKN01000005_gene431	9.270000000000001e-21	90.1	arCOG03950@1|root,arCOG03950@2157|Archaea	2157|Archaea	-	-	-	-	-	-	-	-	-	-	-	-	-	-	-
	NODE_1561_length_9923_cov_1.813904_1	386456.JQKN01000008_gene1585	3.28e-56	191.0	COG0028@1|root,COG1773@1|root,arCOG01999@2157|Archaea,arCOG04391@2157|Archaea,2XWG6@28890|Euryarchaeota,23PYA@183925|Methanobacteria	183925|Methanobacteria	CG	PFAM Thiamine pyrophosphate enzyme, C-terminal TPP-binding	-	-	1.2.3.3	ko:K00158	ko00620,ko01100,map00620,map01100	-	R00207	RC02745	ko00000,ko00001,ko01000	-	-	-	Rubredoxin,TPP_enzyme_C,TPP_enzyme_M,TPP_enzyme_N
	NODE_1561_length_9923_cov_1.813904_2	386456.JQKN01000008_gene1583	5.36e-170	480.0	COG1549@1|root,arCOG00990@2157|Archaea,2XT9W@28890|Euryarchaeota,23NXD@183925|Methanobacteria	183925|Methanobacteria	J	Patch-forming domain C2 of tRNA-guanine transglycosylase	-	-	2.6.1.97	ko:K07557	-	-	-	-	ko00000,ko01000	-	-	-	PUA,TGT_C2
	NODE_1561_length_9923_cov_1.813904_3	386456.JQKN01000008_gene1582	3.78e-47	152.0	COG2151@1|root,arCOG01845@2157|Archaea,2Y0TE@28890|Euryarchaeota,23P6I@183925|Methanobacteria	183925|Methanobacteria	S	Pfam:DUF59	-	-	-	-	-	-	-	-	-	-	-	-	FeS_assembly_P
	NODE_1561_length_9923_cov_1.813904_4	386456.JQKN01000008_gene1581	6.32e-92	273.0	COG2019@1|root,arCOG01039@2157|Archaea	2157|Archaea	F	Belongs to the archaeal adenylate kinase family	adkA	GO:0005575,GO:0005622,GO:0005623,GO:0005737,GO:0044424,GO:0044464	2.7.4.3	ko:K00939	ko00230,ko00730,ko01100,ko01110,ko01130,map00230,map00730,map01100,map01110,map01130	M00049	R00127,R01547,R11319	RC00002	ko00000,ko00001,ko00002,ko01000,ko04147	-	-	-	AAA_17
	NODE_1561_length_9923_cov_1.813904_5	386456.JQKN01000008_gene1578	1.26e-183	518.0	COG0547@1|root,arCOG02012@2157|Archaea,2XT3C@28890|Euryarchaeota,23NKI@183925|Methanobacteria	183925|Methanobacteria	E	Catalyzes the transfer of the phosphoribosyl group of 5- phosphorylribose-1-pyrophosphate (PRPP) to anthranilate to yield N-(5'-phosphoribosyl)-anthranilate (PRA)	trpD	-	2.4.2.18	ko:K00766	ko00400,ko01100,ko01110,ko01130,ko01230,map00400,map01100,map01110,map01130,map01230	M00023	R01073	RC00440	ko00000,ko00001,ko00002,ko01000	-	-	-	Glycos_trans_3N,Glycos_transf_3
	NODE_1561_length_9923_cov_1.813904_6	386456.JQKN01000008_gene1577	3.73e-147	419.0	COG0159@1|root,arCOG01086@2157|Archaea,2XTAW@28890|Euryarchaeota,23NJK@183925|Methanobacteria	183925|Methanobacteria	E	The alpha subunit is responsible for the aldol cleavage of indoleglycerol phosphate to indole and glyceraldehyde 3- phosphate	trpA	-	4.2.1.20	ko:K01695	ko00260,ko00400,ko01100,ko01110,ko01130,ko01230,map00260,map00400,map01100,map01110,map01130,map01230	M00023	R00674,R02340,R02722	RC00209,RC00210,RC00700,RC00701,RC02868	ko00000,ko00001,ko00002,ko01000	-	-	-	Trp_syntA
	NODE_1561_length_9923_cov_1.813904_7	386456.JQKN01000008_gene1576	4.79e-242	669.0	COG0133@1|root,arCOG01433@2157|Archaea,2XUHQ@28890|Euryarchaeota,23NKK@183925|Methanobacteria	183925|Methanobacteria	E	The beta subunit is responsible for the synthesis of L- tryptophan from indole and L-serine	trpB	-	4.2.1.20	ko:K01696	ko00260,ko00400,ko01100,ko01110,ko01130,ko01230,map00260,map00400,map01100,map01110,map01130,map01230	M00023	R00674,R02340,R02722	RC00209,RC00210,RC00700,RC00701,RC02868	ko00000,ko00001,ko00002,ko01000	-	-	-	PALP
	NODE_1561_length_9923_cov_1.813904_8	386456.JQKN01000008_gene1575	5.8699999999999996e-92	275.0	COG0135@1|root,arCOG01983@2157|Archaea,2XZKB@28890|Euryarchaeota,23P5E@183925|Methanobacteria	183925|Methanobacteria	E	Belongs to the TrpF family	trpF	-	5.3.1.24	ko:K01817	ko00400,ko01100,ko01110,ko01130,ko01230,map00400,map01100,map01110,map01130,map01230	M00023	R03509	RC00945	ko00000,ko00001,ko00002,ko01000	-	-	-	PRAI
	NODE_1561_length_9923_cov_1.813904_9	386456.JQKN01000008_gene1574	6.85e-55	179.0	COG0134@1|root,arCOG01088@2157|Archaea,2XTWK@28890|Euryarchaeota,23P2S@183925|Methanobacteria	183925|Methanobacteria	E	Indole-3-glycerol phosphate synthase	trpC	-	4.1.1.48	ko:K01609	ko00400,ko01100,ko01110,ko01130,ko01230,map00400,map01100,map01110,map01130,map01230	M00023	R03508	RC00944	ko00000,ko00001,ko00002,ko01000	-	-	-	IGPS
	NODE_1561_length_9923_cov_1.813904_11	386456.JQKN01000008_gene1573	2.68e-107	313.0	COG0512@1|root,arCOG00086@2157|Archaea,2XV6H@28890|Euryarchaeota,23P0N@183925|Methanobacteria	183925|Methanobacteria	E	synthase	trpG	-	4.1.3.27	ko:K01658	ko00400,ko00405,ko01100,ko01110,ko01130,ko01230,ko02024,ko02025,map00400,map00405,map01100,map01110,map01130,map01230,map02024,map02025	M00023	R00985,R00986	RC00010,RC02148,RC02414	ko00000,ko00001,ko00002,ko01000	-	-	-	GATase
	NODE_1561_length_9923_cov_1.813904_12	386456.JQKN01000008_gene1572	2.33e-251	699.0	COG0147@1|root,arCOG02014@2157|Archaea,2XU5J@28890|Euryarchaeota,23NQP@183925|Methanobacteria	183925|Methanobacteria	E	Part of a heterotetrameric complex that catalyzes the two-step biosynthesis of anthranilate, an intermediate in the biosynthesis of L-tryptophan. In the first step, the glutamine- binding beta subunit (TrpG) of anthranilate synthase (AS) provides the glutamine amidotransferase activity which generates ammonia as a substrate that, along with chorismate, is used in the second step, catalyzed by the…	trpE	-	4.1.3.27	ko:K01657	ko00400,ko00405,ko01100,ko01110,ko01130,ko01230,ko02024,ko02025,map00400,map00405,map01100,map01110,map01130,map01230,map02024,map02025	M00023	R00985,R00986	RC00010,RC02148,RC02414	ko00000,ko00001,ko00002,ko01000	-	-	-	Anth_synt_I_N,Chorismate_bind
	NODE_1517_length_10159_cov_3.379785_1	368407.Memar_0808	6.81e-22	95.5	COG2233@1|root,arCOG02805@2157|Archaea	2157|Archaea	F	COG2233 Xanthine uracil permeases	-	-	-	ko:K02824	-	-	-	-	ko00000,ko02000	2.A.40.1.1,2.A.40.1.2	-	-	Xan_ur_permease
	NODE_1517_length_10159_cov_3.379785_3	1220534.B655_0590	0.000371	42.4	COG1541@1|root,arCOG02622@2157|Archaea,2XVU6@28890|Euryarchaeota	28890|Euryarchaeota	H	TIGRFAM Coenzyme F390 synthetase	-	-	-	-	-	-	-	-	-	-	-	-	AMP-binding
	NODE_1517_length_10159_cov_3.379785_4	386456.JQKN01000011_gene786	3.52e-198	557.0	COG1541@1|root,arCOG02622@2157|Archaea,2XVU6@28890|Euryarchaeota	28890|Euryarchaeota	H	TIGRFAM Coenzyme F390 synthetase	-	-	-	-	-	-	-	-	-	-	-	-	AMP-binding
	NODE_1517_length_10159_cov_3.379785_5	386456.JQKN01000011_gene785	1.19e-253	701.0	COG0585@1|root,arCOG04252@2157|Archaea,2XUTK@28890|Euryarchaeota,23NPR@183925|Methanobacteria	183925|Methanobacteria	J	Could be responsible for synthesis of pseudouridine from uracil-13 in transfer RNAs	truD	-	5.4.99.27	ko:K06176	-	-	-	-	ko00000,ko01000,ko03016	-	-	-	TruD
	NODE_1517_length_10159_cov_3.379785_7	386456.JQKN01000011_gene780	4.54e-44	145.0	arCOG11305@1|root,arCOG11305@2157|Archaea	2157|Archaea	-	-	-	-	-	-	-	-	-	-	-	-	-	-	-
	NODE_1517_length_10159_cov_3.379785_8	386456.JQKN01000011_gene779	1.9900000000000002e-56	182.0	COG1878@1|root,arCOG02462@2157|Archaea	2157|Archaea	Q	cyclase family	-	-	-	-	-	-	-	-	-	-	-	-	Cyclase
	NODE_1517_length_10159_cov_3.379785_9	1220534.B655_0598	2.64e-21	84.0	COG3350@1|root,arCOG04507@2157|Archaea,2Y1MF@28890|Euryarchaeota	28890|Euryarchaeota	S	pfam yhs	-	-	-	-	-	-	-	-	-	-	-	-	YHS
	NODE_1517_length_10159_cov_3.379785_10	868131.MSWAN_1214	0.0	1117.0	COG2217@1|root,arCOG02763@1|root,arCOG01576@2157|Archaea,arCOG02763@2157|Archaea,2XT3T@28890|Euryarchaeota,23NJY@183925|Methanobacteria	183925|Methanobacteria	P	ATPase, P-type, K Mg Cd Cu Zn Na Ca Na H-transporter	-	-	3.6.3.54	ko:K17686	ko01524,ko04016,map01524,map04016	-	R00086	RC00002	ko00000,ko00001,ko01000	3.A.3.5	-	-	E1-E2_ATPase,HMA,Hydrolase
	NODE_1517_length_10159_cov_3.379785_11	386456.JQKN01000011_gene768	3.7900000000000004e-35	135.0	COG2217@1|root,arCOG01576@2157|Archaea,2XT3T@28890|Euryarchaeota,23NJY@183925|Methanobacteria	183925|Methanobacteria	P	ATPase, P-type, K Mg Cd Cu Zn Na Ca Na H-transporter	-	-	3.6.3.4	ko:K01533	-	-	R00086	RC00002	ko00000,ko01000	3.A.3.5	-	-	E1-E2_ATPase,Hydrolase
	NODE_1517_length_10159_cov_3.379785_12	386456.JQKN01000011_gene766	1.7e-26	106.0	COG1228@1|root,arCOG00696@2157|Archaea,2XWAY@28890|Euryarchaeota,23PC9@183925|Methanobacteria	183925|Methanobacteria	Q	Amidohydrolase family	-	-	-	-	-	-	-	-	-	-	-	-	Amidohydro_1
	NODE_1517_length_10159_cov_3.379785_13	386456.JQKN01000011_gene766	1.01e-37	137.0	COG1228@1|root,arCOG00696@2157|Archaea,2XWAY@28890|Euryarchaeota,23PC9@183925|Methanobacteria	183925|Methanobacteria	Q	Amidohydrolase family	-	-	-	-	-	-	-	-	-	-	-	-	Amidohydro_1
	NODE_1517_length_10159_cov_3.379785_14	386456.JQKN01000011_gene766	4.26e-14	71.6	COG1228@1|root,arCOG00696@2157|Archaea,2XWAY@28890|Euryarchaeota,23PC9@183925|Methanobacteria	183925|Methanobacteria	Q	Amidohydrolase family	-	-	-	-	-	-	-	-	-	-	-	-	Amidohydro_1
	NODE_1517_length_10159_cov_3.379785_15	386456.JQKN01000011_gene766	3.03e-62	203.0	COG1228@1|root,arCOG00696@2157|Archaea,2XWAY@28890|Euryarchaeota,23PC9@183925|Methanobacteria	183925|Methanobacteria	Q	Amidohydrolase family	-	-	-	-	-	-	-	-	-	-	-	-	Amidohydro_1
	NODE_1473_length_10462_cov_1.266667_2	334545.CCMG01000015_gene1280	2.54e-19	82.8	COG1320@1|root,COG1320@2|Bacteria,1N75I@1224|Proteobacteria,2UETR@28211|Alphaproteobacteria,47FTX@766|Rickettsiales	766|Rickettsiales	P	Na+/H+ antiporter subunit	-	-	-	ko:K05571	-	-	-	-	ko00000,ko02000	2.A.63.1,2.A.63.2	-	-	PhaG_MnhG_YufB
	NODE_1473_length_10462_cov_1.266667_3	336407.RBE_0825	7.24e-76	243.0	COG1563@1|root,COG1563@2|Bacteria,1QXZ9@1224|Proteobacteria,2UCU7@28211|Alphaproteobacteria,47FIN@766|Rickettsiales	766|Rickettsiales	P	subunit of the Multisubunit Na H antiporter	mnhB	-	-	ko:K05566	-	-	-	-	ko00000,ko02000	2.A.63.1,2.A.63.2	-	-	DUF4040,MnhB
	NODE_1473_length_10462_cov_1.266667_4	336407.RBE_1011	6.99e-22	92.8	COG1006@1|root,COG1006@2|Bacteria,1RGU1@1224|Proteobacteria,2UJ71@28211|Alphaproteobacteria,47FR6@766|Rickettsiales	766|Rickettsiales	P	COG1006 Multisubunit Na H antiporter	mnhC	-	-	ko:K05567	-	-	-	-	ko00000,ko02000	2.A.63.1,2.A.63.2	-	-	Oxidored_q2
	NODE_1473_length_10462_cov_1.266667_5	315456.RF_0460	1.2599999999999999e-83	270.0	COG0651@1|root,COG0651@2|Bacteria,1MURB@1224|Proteobacteria,2TRQ2@28211|Alphaproteobacteria,47FEV@766|Rickettsiales	766|Rickettsiales	CP	COG0651 Formate hydrogenlyase subunit 3 Multisubunit Na H antiporter, MnhD subunit	nuoN2	-	1.6.5.3	ko:K00343,ko:K05568	ko00190,ko01100,map00190,map01100	M00144	R11945	RC00061	ko00000,ko00001,ko00002,ko01000,ko02000	2.A.63.1,2.A.63.2,3.D.1	-	-	Proton_antipo_M
	NODE_1473_length_10462_cov_1.266667_6	1175306.GWL_20450	1.88e-19	88.6	COG5430@1|root,COG5430@2|Bacteria,1MZNQ@1224|Proteobacteria,2VX7C@28216|Betaproteobacteria,4750P@75682|Oxalobacteraceae	28216|Betaproteobacteria	S	Signal peptide protein	-	-	-	-	-	-	-	-	-	-	-	-	SCPU
	NODE_1473_length_10462_cov_1.266667_7	293613.A1E_00860	0.000321	43.5	COG3838@1|root,COG3838@2|Bacteria,1NHHS@1224|Proteobacteria,2UK92@28211|Alphaproteobacteria,47FSB@766|Rickettsiales	766|Rickettsiales	U	TrbC/VIRB2 family	-	-	-	-	-	-	-	-	-	-	-	-	TrbC
	NODE_1473_length_10462_cov_1.266667_9	334545.CCMG01000008_gene445	9.3e-156	449.0	COG0012@1|root,COG0012@2|Bacteria,1MVM4@1224|Proteobacteria,2TRAD@28211|Alphaproteobacteria,47F15@766|Rickettsiales	766|Rickettsiales	J	ATPase that binds to both the 70S ribosome and the 50S ribosomal subunit in a nucleotide-independent manner	ychF	-	-	ko:K06942	-	-	-	-	ko00000,ko03009	-	-	-	MMR_HSR1,YchF-GTPase_C
	NODE_1473_length_10462_cov_1.266667_10	747365.Thena_0244	3.84e-39	147.0	COG0462@1|root,COG0462@2|Bacteria,1TQ6Q@1239|Firmicutes,248ZN@186801|Clostridia,42EXR@68295|Thermoanaerobacterales	186801|Clostridia	F	Involved in the biosynthesis of the central metabolite phospho-alpha-D-ribosyl-1-pyrophosphate (PRPP) via the transfer of pyrophosphoryl group from ATP to 1-hydroxyl of ribose-5-phosphate (Rib-5-P)	prs	-	2.7.6.1	ko:K00948	ko00030,ko00230,ko01100,ko01110,ko01120,ko01130,ko01200,ko01230,map00030,map00230,map01100,map01110,map01120,map01130,map01200,map01230	M00005	R01049	RC00002,RC00078	ko00000,ko00001,ko00002,ko01000	-	-	-	Pribosyl_synth,Pribosyltran_N
	NODE_1473_length_10462_cov_1.266667_11	391896.A1I_05750	9.54e-166	482.0	COG5362@1|root,COG5410@1|root,COG5362@2|Bacteria,COG5410@2|Bacteria,1NKZK@1224|Proteobacteria,2U0EG@28211|Alphaproteobacteria,47F4A@766|Rickettsiales	766|Rickettsiales	S	hmm tigr01630	-	-	-	-	-	-	-	-	-	-	-	-	Terminase_6C
	NODE_1473_length_10462_cov_1.266667_13	315456.RF_0471	2.54e-143	419.0	COG4695@1|root,COG4695@2|Bacteria,1MUP5@1224|Proteobacteria,2TT33@28211|Alphaproteobacteria,47EUP@766|Rickettsiales	766|Rickettsiales	S	Phage portal protein, HK97 family	-	-	-	-	-	-	-	-	-	-	-	-	Phage_portal
	NODE_1473_length_10462_cov_1.266667_14	334545.CCMG01000027_gene1606	5.72e-10	57.0	COG3293@1|root,COG3293@2|Bacteria	2|Bacteria	L	Transposase	-	-	-	-	-	-	-	-	-	-	-	-	DDE_Tnp_1,DDE_Tnp_1_2,DUF4096
	NODE_1446_length_10660_cov_2.582645_1	386456.JQKN01000010_gene684	0.0	1049.0	COG0046@1|root,arCOG00641@2157|Archaea,2XU49@28890|Euryarchaeota,23NVC@183925|Methanobacteria	183925|Methanobacteria	F	Part of the phosphoribosylformylglycinamidine synthase complex involved in the purines biosynthetic pathway. Catalyzes the ATP-dependent conversion of formylglycinamide ribonucleotide (FGAR) and glutamine to yield formylglycinamidine ribonucleotide (FGAM) and glutamate. The FGAM synthase complex is composed of three subunits. PurQ produces an ammonia molecule by converting glutamine to glutamate.…	purL	-	6.3.5.3	ko:K01952	ko00230,ko01100,ko01110,ko01130,map00230,map01100,map01110,map01130	M00048	R04463	RC00010,RC01160	ko00000,ko00001,ko00002,ko01000	-	-	-	AIRS,AIRS_C
	NODE_1446_length_10660_cov_2.582645_2	386456.JQKN01000010_gene685	0.0	1923.0	COG0060@1|root,arCOG00807@2157|Archaea,2XTIX@28890|Euryarchaeota,23NJ4@183925|Methanobacteria	183925|Methanobacteria	J	amino acids such as valine, to avoid such errors it has two additional distinct tRNA(Ile)-dependent editing activities. One activity is designated as 'pretransfer' editing and involves the hydrolysis of activated Val-AMP. The other activity is designated 'posttransfer' editing and involves deacylation of mischarged Val-tRNA(Ile)	ileS	-	6.1.1.5	ko:K01870	ko00970,map00970	M00359,M00360	R03656	RC00055,RC00523	ko00000,ko00001,ko00002,ko01000,ko01007,ko03016	-	-	-	Anticodon_1,tRNA-synt_1
	NODE_1446_length_10660_cov_2.582645_3	386456.JQKN01000010_gene687	4.669999999999999e-241	669.0	COG1812@1|root,arCOG01678@2157|Archaea,2XT7J@28890|Euryarchaeota,23NPC@183925|Methanobacteria	183925|Methanobacteria	H	Catalyzes the formation of S-adenosylmethionine from methionine and ATP	mat	-	2.5.1.6	ko:K00789	ko00270,ko01100,ko01110,ko01230,map00270,map01100,map01110,map01230	M00034,M00035,M00368,M00609	R00177,R04771	RC00021,RC01211	ko00000,ko00001,ko00002,ko01000	-	-	-	AdoMet_Synthase
	NODE_1446_length_10660_cov_2.582645_4	386456.JQKN01000010_gene688	3.64e-63	195.0	COG1430@1|root,arCOG03113@2157|Archaea,2Y0JN@28890|Euryarchaeota,23PQS@183925|Methanobacteria	183925|Methanobacteria	S	Uncharacterized ACR, COG1430	-	-	-	ko:K09005	-	-	-	-	ko00000	-	-	-	DUF192
	NODE_1446_length_10660_cov_2.582645_5	386456.JQKN01000003_gene237	1.9e-10	62.4	COG1413@1|root,arCOG06493@2157|Archaea	2157|Archaea	C	deoxyhypusine monooxygenase activity	-	-	-	-	-	-	-	-	-	-	-	-	HEAT_2,HEAT_PBS
	NODE_1446_length_10660_cov_2.582645_6	386456.JQKN01000010_gene690	1.1000000000000001e-101	298.0	COG1793@1|root,arCOG05256@2157|Archaea,2XY7Z@28890|Euryarchaeota	28890|Euryarchaeota	L	DNA ligase D, 3-phosphoesterase domain	-	-	-	-	-	-	-	-	-	-	-	-	LigD_N
	NODE_1446_length_10660_cov_2.582645_7	386456.JQKN01000010_gene691	3e-135	386.0	COG1036@1|root,arCOG01705@2157|Archaea,2XX7Y@28890|Euryarchaeota,23P07@183925|Methanobacteria	183925|Methanobacteria	C	Flavoprotein	afpA	-	1.5.99.15	ko:K18853	ko00790,map00790	-	R10802	RC01584	ko00000,ko00001,ko01000	-	-	-	Fer4,Flavoprotein
	NODE_1446_length_10660_cov_2.582645_8	386456.JQKN01000010_gene692	1.5799999999999999e-199	561.0	COG0112@1|root,arCOG00070@2157|Archaea,2XU0H@28890|Euryarchaeota,23NRD@183925|Methanobacteria	183925|Methanobacteria	E	Catalyzes the reversible interconversion of serine and glycine with tetrahydromethanopterin (H4MPT) serving as the one- carbon carrier. Also exhibits a pteridine-independent aldolase activity toward beta-hydroxyamino acids, producing glycine and aldehydes, via a retro-aldol mechanism	glyA	-	2.1.2.1	ko:K00600	ko00260,ko00460,ko00630,ko00670,ko00680,ko01100,ko01110,ko01120,ko01130,ko01200,ko01230,ko01523,map00260,map00460,map00630,map00670,map00680,map01100,map01110,map01120,map01130,map01200,map01230,map01523	M00140,M00141,M00346,M00532	R00945,R09099	RC00022,RC00112,RC01583,RC02958	ko00000,ko00001,ko00002,ko01000	-	-	-	SHMT
	NODE_1417_length_10870_cov_1.814298_2	1220534.B655_0361	1.12e-70	261.0	arCOG07611@1|root,arCOG07611@2157|Archaea,2Y6AM@28890|Euryarchaeota,23PGQ@183925|Methanobacteria	183925|Methanobacteria	M	Domain of unknown function DUF11	-	-	-	-	-	-	-	-	-	-	-	-	DUF11
	NODE_1417_length_10870_cov_1.814298_3	386456.JQKN01000013_gene3058	6.56e-25	94.0	COG1532@1|root,arCOG04856@2157|Archaea	2157|Archaea	S	PFAM RNA-binding protein	-	-	-	ko:K06964	-	-	-	-	ko00000	-	-	-	RNA_bind_2
	NODE_1417_length_10870_cov_1.814298_4	386456.JQKN01000013_gene3059	8.49e-208	586.0	COG0044@1|root,arCOG00689@2157|Archaea,2XTQU@28890|Euryarchaeota,23NQR@183925|Methanobacteria	183925|Methanobacteria	F	Belongs to the metallo-dependent hydrolases superfamily. DHOase family. Class I DHOase subfamily	pyrC	-	3.5.2.3	ko:K01465	ko00240,ko01100,map00240,map01100	M00051	R01993	RC00632	ko00000,ko00001,ko00002,ko01000	-	-	-	Amidohydro_1
	NODE_1417_length_10870_cov_1.814298_5	1220534.B655_0285	0.0	1117.0	COG1502@1|root,arCOG02041@2157|Archaea	2157|Archaea	I	Phospholipase D Transphosphatidylase	-	-	-	ko:K06131,ko:K06132,ko:K06915	ko00564,ko01100,map00564,map01100	-	R07390,R11062	RC00017	ko00000,ko00001,ko01000	-	-	-	PLDc_2
	NODE_1417_length_10870_cov_1.814298_6	386456.JQKN01000013_gene3061	2.0500000000000002e-200	562.0	COG1323@1|root,arCOG03224@2157|Archaea,2XUYZ@28890|Euryarchaeota,23PGA@183925|Methanobacteria	183925|Methanobacteria	S	Cytidyltransferase-related C-terminal region	-	-	-	-	-	-	-	-	-	-	-	-	HIGH_NTase1,HIGH_NTase1_ass
	NODE_1417_length_10870_cov_1.814298_7	386456.JQKN01000013_gene3062	9.54e-143	406.0	COG1047@1|root,arCOG00980@2157|Archaea,2XTB7@28890|Euryarchaeota,23NZB@183925|Methanobacteria	183925|Methanobacteria	O	Peptidyl-prolyl cis-trans isomerase	-	-	5.2.1.8	ko:K01802,ko:K03775	-	-	-	-	ko00000,ko01000,ko03110	-	-	-	FKBP_C
	NODE_1417_length_10870_cov_1.814298_9	386456.JQKN01000013_gene3064	0.0	923.0	COG0172@1|root,arCOG00403@2157|Archaea,2XUK2@28890|Euryarchaeota	28890|Euryarchaeota	J	Catalyzes the attachment of serine to tRNA(Ser). Is also able to aminoacylate tRNA(Sec) with serine, to form the misacylated tRNA L-seryl-tRNA(Sec), which will be further converted into selenocysteinyl-tRNA(Sec)	serS	-	6.1.1.11	ko:K01875	ko00970,map00970	M00359,M00360	R03662,R08218	RC00055,RC00523	ko00000,ko00001,ko00002,ko01000,ko01007,ko03016	-	-	iAF692.Mbar_A2126	tRNA-synt_2b
	NODE_1417_length_10870_cov_1.814298_10	386456.JQKN01000013_gene3065	8.65e-31	110.0	arCOG01354@1|root,arCOG01354@2157|Archaea	2157|Archaea	-	-	-	GO:0003674,GO:0003824,GO:0005575,GO:0005622,GO:0005623,GO:0005737,GO:0008080,GO:0016407,GO:0016410,GO:0016740,GO:0016746,GO:0016747,GO:0044424,GO:0044464	-	-	-	-	-	-	-	-	-	-	Pcc1
	NODE_1411_length_10926_cov_1.630244_1	386456.JQKN01000001_gene1911	3.4400000000000004e-161	474.0	arCOG02348@1|root,arCOG07605@1|root,arCOG02348@2157|Archaea,arCOG07605@2157|Archaea	2157|Archaea	T	Histidine kinase-like ATPases	-	-	-	-	-	-	-	-	-	-	-	-	GAF,GAF_2,HATPase_c,HisKA,PAS,PAS_3,PAS_4,PAS_9
	NODE_1411_length_10926_cov_1.630244_2	1220534.B655_1290	3.08e-13	62.4	arCOG14558@1|root,arCOG14558@2157|Archaea	2157|Archaea	-	-	-	-	-	-	-	-	-	-	-	-	-	-	-
	NODE_1411_length_10926_cov_1.630244_3	386456.JQKN01000001_gene1853	3.62e-114	334.0	COG0640@1|root,arCOG00734@2157|Archaea,2XXHJ@28890|Euryarchaeota,23PQV@183925|Methanobacteria	183925|Methanobacteria	K	regulatory protein, arsR	-	-	-	-	-	-	-	-	-	-	-	-	HTH_20,HTH_5
	NODE_1411_length_10926_cov_1.630244_4	386456.JQKN01000001_gene1852	2.31e-96	287.0	arCOG06458@1|root,arCOG06458@2157|Archaea,2XYWE@28890|Euryarchaeota,23P4I@183925|Methanobacteria	183925|Methanobacteria	-	-	-	-	-	-	-	-	-	-	-	-	-	-	-
	NODE_1411_length_10926_cov_1.630244_5	386456.JQKN01000001_gene1851	4.8399999999999995e-40	140.0	COG2218@1|root,arCOG00098@2157|Archaea,2XVBM@28890|Euryarchaeota	28890|Euryarchaeota	C	PFAM glutamate synthase alpha subunit	-	-	1.2.7.12	ko:K00202	ko00680,ko01100,ko01120,ko01200,map00680,map01100,map01120,map01200	M00567	R03015,R08060,R11743	RC00197,RC00323	ko00000,ko00001,ko00002,ko01000	-	-	-	GXGXG
	NODE_1411_length_10926_cov_1.630244_6	386456.JQKN01000001_gene1851	1.35e-79	248.0	COG2218@1|root,arCOG00098@2157|Archaea,2XVBM@28890|Euryarchaeota	28890|Euryarchaeota	C	PFAM glutamate synthase alpha subunit	-	-	1.2.7.12	ko:K00202	ko00680,ko01100,ko01120,ko01200,map00680,map01100,map01120,map01200	M00567	R03015,R08060,R11743	RC00197,RC00323	ko00000,ko00001,ko00002,ko01000	-	-	-	GXGXG
	NODE_1411_length_10926_cov_1.630244_7	386456.JQKN01000001_gene1850	1.8e-150	430.0	COG2035@1|root,arCOG04565@2157|Archaea,2XT6X@28890|Euryarchaeota,23NUB@183925|Methanobacteria	183925|Methanobacteria	S	Domain of unknown function (DUF368)	-	-	-	ko:K08974	-	-	-	-	ko00000	-	-	-	DUF368
	NODE_1411_length_10926_cov_1.630244_8	386456.JQKN01000014_gene3081	5.29e-90	268.0	COG0586@1|root,arCOG03117@2157|Archaea,2XY9U@28890|Euryarchaeota	28890|Euryarchaeota	S	PFAM SNARE associated Golgi protein	-	-	-	ko:K03975	-	-	-	-	ko00000	-	-	-	SNARE_assoc
	NODE_1411_length_10926_cov_1.630244_9	247490.KSU1_D0005	1.32e-22	92.0	2C4PS@1|root,2ZHNK@2|Bacteria	247490.KSU1_D0005|-	-	-	-	-	-	-	-	-	-	-	-	-	-	-	-
	NODE_1411_length_10926_cov_1.630244_10	386456.JQKN01000001_gene1847	3.34e-170	482.0	COG0281@1|root,arCOG01331@2157|Archaea,2XTRZ@28890|Euryarchaeota,23PGN@183925|Methanobacteria	183925|Methanobacteria	O	Belongs to the peptidase M48B family	htpX	-	-	ko:K03799	-	M00743	-	-	ko00000,ko00002,ko01000,ko01002	-	-	-	EF-hand_5,Peptidase_M48
	NODE_1411_length_10926_cov_1.630244_11	386456.JQKN01000001_gene1846	3.69e-36	130.0	arCOG12964@1|root,arCOG12964@2157|Archaea,2Y2FZ@28890|Euryarchaeota	28890|Euryarchaeota	S	Tocopherol cyclase	-	-	-	-	-	-	-	-	-	-	-	-	Tocopherol_cycl
	NODE_1411_length_10926_cov_1.630244_12	386456.JQKN01000001_gene1846	4.82e-67	212.0	arCOG12964@1|root,arCOG12964@2157|Archaea,2Y2FZ@28890|Euryarchaeota	28890|Euryarchaeota	S	Tocopherol cyclase	-	-	-	-	-	-	-	-	-	-	-	-	Tocopherol_cycl
	NODE_1411_length_10926_cov_1.630244_13	386456.JQKN01000001_gene1846	3.33e-27	107.0	arCOG12964@1|root,arCOG12964@2157|Archaea,2Y2FZ@28890|Euryarchaeota	28890|Euryarchaeota	S	Tocopherol cyclase	-	-	-	-	-	-	-	-	-	-	-	-	Tocopherol_cycl
	NODE_1411_length_10926_cov_1.630244_14	386456.JQKN01000001_gene1845	8.739999999999999e-34	116.0	COG4895@1|root,arCOG04920@2157|Archaea,2Y0A3@28890|Euryarchaeota	28890|Euryarchaeota	S	Uncharacterized conserved protein (DUF2196)	-	-	-	-	-	-	-	-	-	-	-	-	DUF2196
	NODE_1411_length_10926_cov_1.630244_15	386456.JQKN01000001_gene1844	9.15e-78	239.0	COG0681@1|root,arCOG09715@2157|Archaea,2Y4K0@28890|Euryarchaeota,23PSS@183925|Methanobacteria	183925|Methanobacteria	U	Peptidase S24-like	-	-	-	-	-	-	-	-	-	-	-	-	Peptidase_S24
	NODE_1411_length_10926_cov_1.630244_16	386456.JQKN01000001_gene1843	3.29e-107	314.0	COG0169@1|root,arCOG02097@2157|Archaea,2XWH4@28890|Euryarchaeota,23P3D@183925|Methanobacteria	183925|Methanobacteria	E	Involved in the third step of the chorismate pathway, which leads to the biosynthesis of aromatic amino acids. Catalyzes the cis-dehydration of 3-dehydroquinate (DHQ) and introduces the first double bond of the aromatic ring to yield 3- dehydroshikimate	aroD	-	4.2.1.10	ko:K03785	ko00400,ko01100,ko01110,ko01130,ko01230,map00400,map01100,map01110,map01130,map01230	M00022	R03084	RC00848	ko00000,ko00001,ko00002,ko01000	-	-	-	DHquinase_I
	NODE_1411_length_10926_cov_1.630244_17	386456.JQKN01000001_gene1842	3.5e-126	364.0	COG4053@1|root,arCOG04839@2157|Archaea,2XSU0@28890|Euryarchaeota,23NY8@183925|Methanobacteria	183925|Methanobacteria	-	-	-	-	-	-	-	-	-	-	-	-	-	-	-
	NODE_1325_length_11498_cov_2.506376_1	868131.MSWAN_2345	0.000114	43.1	arCOG10208@1|root,arCOG10208@2157|Archaea	2157|Archaea	-	-	-	-	-	-	-	-	-	-	-	-	-	-	-
	NODE_1325_length_11498_cov_2.506376_2	386456.JQKN01000010_gene670	1.03e-19	85.5	arCOG01792@1|root,arCOG01792@2157|Archaea,2XSXC@28890|Euryarchaeota	28890|Euryarchaeota	Q	Methyltransferase type 11	arsM	-	2.1.1.137	ko:K07755	-	-	-	-	ko00000,ko01000	-	-	-	Methyltransf_31
	NODE_1325_length_11498_cov_2.506376_3	386456.JQKN01000010_gene670	2.1e-61	196.0	arCOG01792@1|root,arCOG01792@2157|Archaea,2XSXC@28890|Euryarchaeota	28890|Euryarchaeota	Q	Methyltransferase type 11	arsM	-	2.1.1.137	ko:K07755	-	-	-	-	ko00000,ko01000	-	-	-	Methyltransf_31
	NODE_1325_length_11498_cov_2.506376_4	1220534.B655_1130	3.34e-220	619.0	COG0446@1|root,arCOG01069@2157|Archaea,2XT0A@28890|Euryarchaeota,23NSB@183925|Methanobacteria	183925|Methanobacteria	P	Pyridine nucleotide-disulphide oxidoreductase, dimerisation	nox	-	1.6.3.3	ko:K17870	-	-	-	-	ko00000,ko01000	-	-	-	Pyr_redox_2,Pyr_redox_3,Pyr_redox_dim
	NODE_1325_length_11498_cov_2.506376_5	386456.JQKN01000010_gene664	1.13e-298	818.0	COG0369@1|root,arCOG02430@2157|Archaea,2XV44@28890|Euryarchaeota,23NS7@183925|Methanobacteria	183925|Methanobacteria	C	Catalyzes the reduction of hydroxylamine to form NH(3) and H(2)O	hcp	-	1.7.99.1	ko:K05601	ko00910,map00910	-	R00143	RC02797	ko00000,ko00001,ko01000	-	-	-	Prismane
	NODE_1325_length_11498_cov_2.506376_6	386456.JQKN01000010_gene663	7.46e-147	417.0	COG1719@1|root,arCOG01688@2157|Archaea,2XYSH@28890|Euryarchaeota,23P5X@183925|Methanobacteria	183925|Methanobacteria	K	transcriptional regulator, ArsR family	-	-	-	ko:K07013	-	-	-	-	ko00000	-	-	-	HTH_5,V4R
	NODE_1325_length_11498_cov_2.506376_7	1220534.B655_1132	8.08e-84	248.0	COG1592@1|root,arCOG01097@2157|Archaea,2XX3D@28890|Euryarchaeota,23PQ8@183925|Methanobacteria	183925|Methanobacteria	C	Rubrerythrin	-	-	-	ko:K19824	-	-	-	-	ko00000	-	-	-	Rubrerythrin
	NODE_1325_length_11498_cov_2.506376_8	386456.JQKN01000010_gene659	1.14e-262	723.0	COG0426@1|root,arCOG00509@2157|Archaea,2XSUD@28890|Euryarchaeota,23PC4@183925|Methanobacteria	183925|Methanobacteria	C	PFAM Flavodoxin nitric oxide synthase	-	-	1.5.3.22	ko:K19817	-	-	-	-	ko00000,ko01000	-	-	-	Flavodoxin_1,Lactamase_B
	NODE_1325_length_11498_cov_2.506376_9	386456.JQKN01000010_gene658	1.44e-127	369.0	COG1719@1|root,arCOG01688@2157|Archaea,2XYSH@28890|Euryarchaeota,23P5X@183925|Methanobacteria	28890|Euryarchaeota	K	transcriptional regulator, ArsR family	-	-	-	ko:K07013	-	-	-	-	ko00000	-	-	-	DUF2507,HTH_5,V4R
	NODE_1325_length_11498_cov_2.506376_10	386456.JQKN01000012_gene1075	6.02e-41	141.0	COG0596@1|root,arCOG01648@2157|Archaea,2Y7W6@28890|Euryarchaeota,23PP4@183925|Methanobacteria	183925|Methanobacteria	S	Alpha/beta hydrolase family	-	-	-	-	-	-	-	-	-	-	-	-	Abhydrolase_5
	NODE_1325_length_11498_cov_2.506376_11	386456.JQKN01000012_gene1075	5.14e-63	201.0	COG0596@1|root,arCOG01648@2157|Archaea,2Y7W6@28890|Euryarchaeota,23PP4@183925|Methanobacteria	183925|Methanobacteria	S	Alpha/beta hydrolase family	-	-	-	-	-	-	-	-	-	-	-	-	Abhydrolase_5
	NODE_1325_length_11498_cov_2.506376_12	386456.JQKN01000010_gene657	8.579999999999999e-126	362.0	COG2243@1|root,arCOG00648@2157|Archaea,2XTS5@28890|Euryarchaeota,23PDG@183925|Methanobacteria	183925|Methanobacteria	H	Precorrin-2 C20-methyltransferase	cbiL	-	2.1.1.130,2.1.1.151	ko:K03394	ko00860,ko01100,map00860,map01100	-	R03948,R05808	RC00003,RC01035,RC01662	ko00000,ko00001,ko01000	-	-	-	TP_methylase
	NODE_1325_length_11498_cov_2.506376_13	386456.JQKN01000010_gene656	0.0	994.0	COG1199@1|root,arCOG00770@2157|Archaea,2XSWZ@28890|Euryarchaeota,23NV7@183925|Methanobacteria	183925|Methanobacteria	L	HELICc2	-	-	-	-	-	-	-	-	-	-	-	-	DEAD_2,Helicase_C_2,ResIII
	NODE_1325_length_11498_cov_2.506376_14	102232.GLO73106DRAFT_00033240	1.1e-10	60.5	COG4430@1|root,COG4430@2|Bacteria,1G2ES@1117|Cyanobacteria	1117|Cyanobacteria	S	Bacteriocin-protection, YdeI or OmpD-Associated	-	-	-	-	-	-	-	-	-	-	-	-	OmdA
	NODE_1229_length_12334_cov_1.279758_1	386456.JQKN01000001_gene1986	9.819999999999999e-55	176.0	COG0784@1|root,arCOG02589@2157|Archaea,2XVUK@28890|Euryarchaeota	28890|Euryarchaeota	T	response regulator, receiver	-	-	-	-	-	-	-	-	-	-	-	-	Response_reg
	NODE_1229_length_12334_cov_1.279758_6	386456.JQKN01000002_gene2885	1.25e-12	67.8	arCOG10346@1|root,arCOG10346@2157|Archaea	2157|Archaea	-	-	-	-	-	-	-	-	-	-	-	-	-	-	zinc_ribbon_2
	NODE_1229_length_12334_cov_1.279758_7	386456.JQKN01000002_gene2884	2.71e-156	474.0	COG0826@1|root,arCOG03203@2157|Archaea,2XT7F@28890|Euryarchaeota,23PCI@183925|Methanobacteria	183925|Methanobacteria	O	peptidase	-	-	-	ko:K08303	ko05120,map05120	-	-	-	ko00000,ko00001,ko01000,ko01002	-	-	-	DUF3656,Peptidase_U32
	NODE_1229_length_12334_cov_1.279758_8	386456.JQKN01000002_gene2884	1.3799999999999999e-180	531.0	COG0826@1|root,arCOG03203@2157|Archaea,2XT7F@28890|Euryarchaeota,23PCI@183925|Methanobacteria	183925|Methanobacteria	O	peptidase	-	-	-	ko:K08303	ko05120,map05120	-	-	-	ko00000,ko00001,ko01000,ko01002	-	-	-	DUF3656,Peptidase_U32
	NODE_1229_length_12334_cov_1.279758_9	386456.JQKN01000002_gene2883	3.47e-106	309.0	COG0125@1|root,arCOG01891@2157|Archaea,2XTAM@28890|Euryarchaeota,23P2Z@183925|Methanobacteria	183925|Methanobacteria	F	thymidylate kinase	tmk	-	2.7.4.9	ko:K00943	ko00240,ko01100,map00240,map01100	M00053	R02094,R02098	RC00002	ko00000,ko00001,ko00002,ko01000	-	-	-	Thymidylate_kin
	NODE_1229_length_12334_cov_1.279758_10	386456.JQKN01000002_gene2882	9.51e-87	256.0	arCOG13994@1|root,arCOG13994@2157|Archaea	386456.JQKN01000002_gene2882|-	-	-	-	-	-	-	-	-	-	-	-	-	-	-	-
	NODE_1229_length_12334_cov_1.279758_11	386456.JQKN01000002_gene2881	2.8500000000000002e-21	85.1	arCOG07795@1|root,arCOG07795@2157|Archaea	2157|Archaea	-	-	-	-	-	-	-	-	-	-	-	-	-	-	-
	NODE_1229_length_12334_cov_1.279758_12	386456.JQKN01000002_gene2880	4.5e-194	542.0	COG0162@1|root,arCOG01886@2157|Archaea,2XTA0@28890|Euryarchaeota,23NM2@183925|Methanobacteria	183925|Methanobacteria	J	Catalyzes the attachment of tyrosine to tRNA(Tyr) in a two-step reaction tyrosine is first activated by ATP to form Tyr- AMP and then transferred to the acceptor end of tRNA(Tyr)	tyrS	-	6.1.1.1	ko:K01866	ko00970,map00970	M00359,M00360	R02918	RC00055,RC00523	ko00000,ko00001,ko00002,ko01000,ko01007,ko03016,ko03029	-	-	-	tRNA-synt_1b
	NODE_1229_length_12334_cov_1.279758_13	386456.JQKN01000002_gene2879	4.97e-188	530.0	COG1499@1|root,arCOG04149@2157|Archaea,2XUAI@28890|Euryarchaeota,23NXE@183925|Methanobacteria	183925|Methanobacteria	J	NMD3 family	-	-	-	ko:K07562	ko03008,ko03013,map03008,map03013	-	-	-	ko00000,ko00001,ko03009	-	-	-	NMD3
	NODE_1229_length_12334_cov_1.279758_14	386456.JQKN01000002_gene2878	1.26e-90	265.0	COG1601@1|root,arCOG01640@2157|Archaea,2XTVZ@28890|Euryarchaeota,23P0P@183925|Methanobacteria	183925|Methanobacteria	J	eIF-2 functions in the early steps of protein synthesis by forming a ternary complex with GTP and initiator tRNA	eif2b	-	-	ko:K03238	ko03013,map03013	-	-	-	ko00000,ko00001,ko01009,ko03012	-	-	-	eIF-5_eIF-2B
	NODE_1229_length_12334_cov_1.279758_15	386456.JQKN01000002_gene2877	5.95e-282	784.0	COG1241@1|root,arCOG00439@2157|Archaea,2XT5D@28890|Euryarchaeota,23NN9@183925|Methanobacteria	183925|Methanobacteria	L	Belongs to the MCM family	mcm	-	-	ko:K10726	ko03030,map03030	-	-	-	ko00000,ko00001,ko01000,ko03032	-	-	-	MCM,MCM_N,MCM_OB
	NODE_1137_length_13178_cov_1.387863_1	386456.JQKN01000017_gene863	5.5100000000000004e-59	194.0	COG2710@1|root,arCOG00594@2157|Archaea,2XUNU@28890|Euryarchaeota	28890|Euryarchaeota	C	Belongs to the NifD NifK NifE NifN family	-	-	1.18.6.1	ko:K02591	ko00625,ko00910,ko01100,ko01120,map00625,map00910,map01100,map01120	M00175	R05185,R05496	RC00002,RC01395,RC02891	ko00000,ko00001,ko00002,ko01000	-	-	-	Oxidored_nitro
	NODE_1137_length_13178_cov_1.387863_2	386456.JQKN01000017_gene863	3.91e-162	464.0	COG2710@1|root,arCOG00594@2157|Archaea,2XUNU@28890|Euryarchaeota	28890|Euryarchaeota	C	Belongs to the NifD NifK NifE NifN family	-	-	1.18.6.1	ko:K02591	ko00625,ko00910,ko01100,ko01120,map00625,map00910,map01100,map01120	M00175	R05185,R05496	RC00002,RC01395,RC02891	ko00000,ko00001,ko00002,ko01000	-	-	-	Oxidored_nitro
	NODE_1137_length_13178_cov_1.387863_3	386456.JQKN01000017_gene864	3.3600000000000004e-57	189.0	COG2710@1|root,arCOG00598@2157|Archaea,2XUYY@28890|Euryarchaeota	28890|Euryarchaeota	C	nitrogenase component I, alpha chain	-	-	1.18.6.1	ko:K02586	ko00625,ko00910,ko01100,ko01120,map00625,map00910,map01100,map01120	M00175	R05185,R05496	RC00002,RC01395,RC02891	ko00000,ko00001,ko00002,ko01000	-	-	-	Oxidored_nitro
	NODE_1137_length_13178_cov_1.387863_4	386456.JQKN01000017_gene864	6.06e-211	591.0	COG2710@1|root,arCOG00598@2157|Archaea,2XUYY@28890|Euryarchaeota	28890|Euryarchaeota	C	nitrogenase component I, alpha chain	-	-	1.18.6.1	ko:K02586	ko00625,ko00910,ko01100,ko01120,map00625,map00910,map01100,map01120	M00175	R05185,R05496	RC00002,RC01395,RC02891	ko00000,ko00001,ko00002,ko01000	-	-	-	Oxidored_nitro
	NODE_1137_length_13178_cov_1.387863_5	386456.JQKN01000017_gene865	3.52e-69	210.0	COG0347@1|root,arCOG02308@2157|Archaea,2XYEK@28890|Euryarchaeota,23PRQ@183925|Methanobacteria	183925|Methanobacteria	K	Belongs to the P(II) protein family	-	-	-	ko:K02590	-	-	-	-	ko00000	-	-	-	P-II
	NODE_1137_length_13178_cov_1.387863_6	386456.JQKN01000017_gene866	6.26e-61	188.0	COG0347@1|root,arCOG02306@2157|Archaea,2XXZK@28890|Euryarchaeota,23PRR@183925|Methanobacteria	183925|Methanobacteria	K	Belongs to the P(II) protein family	-	-	-	ko:K02589	-	-	-	-	ko00000	-	-	-	P-II
	NODE_1137_length_13178_cov_1.387863_7	1220534.B655_1949	2.68e-186	519.0	COG1348@1|root,arCOG00590@2157|Archaea,2XUM3@28890|Euryarchaeota,23PY8@183925|Methanobacteria	183925|Methanobacteria	D	The key enzymatic reactions in nitrogen fixation are catalyzed by the nitrogenase complex, which has 2 components the iron protein and the molybdenum-iron protein	-	-	1.18.6.1	ko:K02588	ko00625,ko00910,ko01100,ko01120,map00625,map00910,map01100,map01120	M00175	R05185,R05496	RC00002,RC01395,RC02891	ko00000,ko00001,ko00002,ko01000	-	-	-	Fer4_NifH
	NODE_1137_length_13178_cov_1.387863_8	386456.JQKN01000017_gene869	0.0	952.0	COG5016@1|root,arCOG02095@2157|Archaea,2XV3W@28890|Euryarchaeota,23PD1@183925|Methanobacteria	183925|Methanobacteria	C	TIGRFAM oxaloacetate decarboxylase alpha subunit	pycB	-	6.4.1.1	ko:K01960	ko00020,ko00620,ko00720,ko01100,ko01120,ko01200,ko01230,map00020,map00620,map00720,map01100,map01120,map01200,map01230	M00173,M00620	R00344	RC00040,RC00367	ko00000,ko00001,ko00002,ko01000	-	-	-	Biotin_lipoyl,HMGL-like,PYC_OADA
	NODE_1137_length_13178_cov_1.387863_9	386456.JQKN01000017_gene870	5.0299999999999995e-74	228.0	arCOG01788@1|root,arCOG01788@2157|Archaea,2Y7W7@28890|Euryarchaeota,23PMY@183925|Methanobacteria	183925|Methanobacteria	Q	PFAM Methyltransferase	-	-	-	ko:K15256	-	-	-	-	ko00000,ko01000,ko03016	-	-	-	Methyltransf_25
	NODE_1137_length_13178_cov_1.387863_10	386456.JQKN01000017_gene870	3.41e-22	91.7	arCOG01788@1|root,arCOG01788@2157|Archaea,2Y7W7@28890|Euryarchaeota,23PMY@183925|Methanobacteria	183925|Methanobacteria	Q	PFAM Methyltransferase	-	-	-	ko:K15256	-	-	-	-	ko00000,ko01000,ko03016	-	-	-	Methyltransf_25
	NODE_1137_length_13178_cov_1.387863_11	386456.JQKN01000017_gene872	2.5000000000000004e-125	361.0	COG0603@1|root,arCOG00039@2157|Archaea,2XTS7@28890|Euryarchaeota,23NVE@183925|Methanobacteria	183925|Methanobacteria	H	Catalyzes the ATP-dependent conversion of 7-carboxy-7- deazaguanine (CDG) to 7-cyano-7-deazaguanine (preQ(0))	queC	-	6.3.4.20	ko:K06920	ko00790,ko01100,map00790,map01100	-	R09978	RC00959	ko00000,ko00001,ko01000,ko03016	-	-	-	QueC
	NODE_1137_length_13178_cov_1.387863_13	386456.JQKN01000017_gene871	3.01e-211	592.0	COG1641@1|root,arCOG02701@2157|Archaea,2XV3G@28890|Euryarchaeota,23NRK@183925|Methanobacteria	183925|Methanobacteria	S	Belongs to the LarC family	-	-	4.99.1.12	ko:K09121	-	-	-	-	ko00000,ko01000	-	-	-	DUF111
	NODE_1137_length_13178_cov_1.387863_15	386456.JQKN01000017_gene874	1.03e-44	152.0	arCOG10865@1|root,arCOG10865@2157|Archaea	2157|Archaea	-	-	-	-	3.5.1.28	ko:K01449	-	-	R04112	RC00064,RC00141	ko00000,ko01000	-	-	-	-
	NODE_1137_length_13178_cov_1.387863_17	386456.JQKN01000017_gene875	1.74e-60	187.0	COG4075@1|root,arCOG03424@2157|Archaea,2XYU3@28890|Euryarchaeota	28890|Euryarchaeota	S	Uncharacterized protein, homolog of nitrogen regulatory protein PII	-	-	-	-	-	-	-	-	-	-	-	-	Nit_Regul_Hom
	NODE_1137_length_13178_cov_1.387863_18	386456.JQKN01000008_gene1557	3.97e-58	203.0	arCOG07611@1|root,arCOG09729@1|root,arCOG07611@2157|Archaea,arCOG09729@2157|Archaea	2157|Archaea	E	Polymorphic membrane protein, Chlamydia	-	-	-	-	-	-	-	-	-	-	-	-	Big_3_5,Chlam_PMP,DUF11
	NODE_1034_length_14288_cov_2.237907_1	386456.JQKN01000005_gene498	1.46e-49	159.0	COG1308@1|root,arCOG04061@2157|Archaea,2XXYV@28890|Euryarchaeota,23P5R@183925|Methanobacteria	183925|Methanobacteria	K	Contacts the emerging nascent chain on the ribosome	nac	-	-	ko:K03626	-	-	-	-	ko00000	-	-	-	NAC
	NODE_1034_length_14288_cov_2.237907_2	386456.JQKN01000005_gene499	0.0	1031.0	COG0343@1|root,COG1370@1|root,arCOG00989@2157|Archaea,arCOG00991@2157|Archaea,2XTFH@28890|Euryarchaeota,23NJG@183925|Methanobacteria	183925|Methanobacteria	J	Exchanges the guanine residue with 7-cyano-7- deazaguanine (preQ0) at position 15 in the dihydrouridine loop (D- loop) of archaeal tRNAs	tgtA	-	2.4.2.48	ko:K18779	-	-	-	-	ko00000,ko01000,ko03016	-	-	-	PUA,TGT,TGT_C2
	NODE_1034_length_14288_cov_2.237907_3	386456.JQKN01000005_gene500	6.5e-95	290.0	COG4121@1|root,arCOG00120@2157|Archaea,2XV6C@28890|Euryarchaeota,23NZY@183925|Methanobacteria	183925|Methanobacteria	S	S-adenosyl-L-methionine-dependent methyltransferase	-	-	-	-	-	-	-	-	-	-	-	-	Methyltransf_30
	NODE_1034_length_14288_cov_2.237907_4	386456.JQKN01000005_gene500	7.009999999999999e-52	176.0	COG4121@1|root,arCOG00120@2157|Archaea,2XV6C@28890|Euryarchaeota,23NZY@183925|Methanobacteria	183925|Methanobacteria	S	S-adenosyl-L-methionine-dependent methyltransferase	-	-	-	-	-	-	-	-	-	-	-	-	Methyltransf_30
	NODE_1034_length_14288_cov_2.237907_6	386456.JQKN01000005_gene501	1.78e-110	320.0	COG0655@1|root,arCOG02573@2157|Archaea,2XVMU@28890|Euryarchaeota,23PMW@183925|Methanobacteria	183925|Methanobacteria	S	PFAM NADPH-dependent FMN reductase	-	-	-	-	-	-	-	-	-	-	-	-	FMN_red
	NODE_1034_length_14288_cov_2.237907_7	386456.JQKN01000005_gene502	1.91e-100	301.0	COG0463@1|root,arCOG00896@2157|Archaea,2Y7MP@28890|Euryarchaeota,23PZ5@183925|Methanobacteria	183925|Methanobacteria	M	Glycosyl transferase family 2	-	-	-	-	-	-	-	-	-	-	-	-	Glycos_transf_2
	NODE_1034_length_14288_cov_2.237907_8	386456.JQKN01000005_gene503	5.109999999999999e-38	132.0	COG2456@1|root,arCOG05092@2157|Archaea,2XZCE@28890|Euryarchaeota,23P9R@183925|Methanobacteria	183925|Methanobacteria	S	Uncharacterized conserved protein (DUF2304)	-	-	-	ko:K09153	-	-	-	-	ko00000	-	-	-	DUF2304
	NODE_1034_length_14288_cov_2.237907_9	237368.SCABRO_00142	9.3e-128	369.0	COG1208@1|root,COG1208@2|Bacteria,2IX9K@203682|Planctomycetes	203682|Planctomycetes	JM	Nucleotidyl transferase	-	-	2.7.7.33	ko:K00978	ko00500,ko00520,ko01100,map00500,map00520,map01100	-	R00956	RC00002	ko00000,ko00001,ko01000	-	-	-	NTP_transferase
	NODE_1034_length_14288_cov_2.237907_10	118168.MC7420_5158	3.01e-154	442.0	COG0451@1|root,COG0451@2|Bacteria,1G2VR@1117|Cyanobacteria,1H9RF@1150|Oscillatoriales	1117|Cyanobacteria	M	PFAM NAD dependent epimerase dehydratase family	-	-	4.2.1.45	ko:K01709	ko00520,map00520	-	R02426	RC00402	ko00000,ko00001,ko01000	-	-	-	GDP_Man_Dehyd
	NODE_1034_length_14288_cov_2.237907_11	679926.Mpet_1370	1.13e-286	801.0	COG0028@1|root,arCOG01998@2157|Archaea,2XT5F@28890|Euryarchaeota,2N9B4@224756|Methanomicrobia	28890|Euryarchaeota	E	TIGRFAM acetolactate synthase, large subunit, biosynthetic type	ilvB	-	2.2.1.6	ko:K01652	ko00290,ko00650,ko00660,ko00770,ko01100,ko01110,ko01130,ko01210,ko01230,map00290,map00650,map00660,map00770,map01100,map01110,map01130,map01210,map01230	M00019,M00570	R00006,R00014,R00226,R03050,R04672,R04673,R08648	RC00027,RC00106,RC01192,RC02744,RC02893	ko00000,ko00001,ko00002,ko01000	-	-	-	TPP_enzyme_C,TPP_enzyme_M,TPP_enzyme_N
	NODE_1034_length_14288_cov_2.237907_12	679926.Mpet_1371	1.9900000000000002e-66	214.0	COG0546@1|root,arCOG02292@2157|Archaea	2157|Archaea	S	HAD-superfamily hydrolase, subfamily IA, variant 1	-	-	3.1.3.18	ko:K01091	ko00630,ko01100,ko01110,ko01130,map00630,map01100,map01110,map01130	-	R01334	RC00017	ko00000,ko00001,ko01000	-	-	-	HAD_2
	NODE_1034_length_14288_cov_2.237907_13	679926.Mpet_1372	5.23e-111	327.0	COG3836@1|root,arCOG04974@2157|Archaea,2Y4ZT@28890|Euryarchaeota	28890|Euryarchaeota	G	HpcH/HpaI aldolase/citrate lyase family	-	-	-	-	-	-	-	-	-	-	-	-	HpcH_HpaI
	NODE_1034_length_14288_cov_2.237907_14	388467.A19Y_0927	6.34e-102	308.0	COG2520@1|root,COG2520@2|Bacteria	2|Bacteria	J	tRNA (guanine(37)-N(1))-methyltransferase activity	XK27_03530	-	-	-	-	-	-	-	-	-	-	-	Methyltransf_21,rRNA_methylase
	NODE_1034_length_14288_cov_2.237907_15	388467.A19Y_0928	1.05e-157	452.0	COG0451@1|root,COG0451@2|Bacteria,1G3VX@1117|Cyanobacteria,1HE17@1150|Oscillatoriales	1117|Cyanobacteria	GM	3-beta hydroxysteroid dehydrogenase/isomerase family	-	-	4.1.1.35	ko:K08678	ko00520,ko01100,map00520,map01100	M00361	R01384	RC00508	ko00000,ko00001,ko00002,ko01000	-	-	-	Epimerase
	NODE_1034_length_14288_cov_2.237907_16	679926.Mpet_1374	2.6599999999999998e-126	371.0	COG0399@1|root,arCOG00118@2157|Archaea,2XV66@28890|Euryarchaeota	28890|Euryarchaeota	E	Belongs to the DegT DnrJ EryC1 family	-	-	1.17.1.1	ko:K12452	ko00520,map00520	-	R03391,R03392	RC00230	ko00000,ko00001,ko01000	-	-	-	DegT_DnrJ_EryC1
	NODE_965_length_14917_cov_2.021231_1	1220534.B655_0497	0.0	985.0	COG0574@1|root,arCOG01114@2157|Archaea	2157|Archaea	G	Pyruvate phosphate dikinase	-	-	2.7.3.13,2.7.9.2	ko:K01007,ko:K22424	ko00620,ko00680,ko00720,ko01100,ko01120,ko01200,map00620,map00680,map00720,map01100,map01120,map01200	M00173,M00374	R00199	RC00002,RC00015	ko00000,ko00001,ko00002,ko01000	-	-	-	PEP-utilizers,PPDK_N
	NODE_965_length_14917_cov_2.021231_3	386456.JQKN01000016_gene911	5.74e-28	103.0	arCOG10257@1|root,arCOG10257@2157|Archaea	2157|Archaea	-	-	-	-	-	-	-	-	-	-	-	-	-	-	-
	NODE_965_length_14917_cov_2.021231_4	386456.JQKN01000016_gene910	6.52e-35	122.0	arCOG10257@1|root,arCOG10257@2157|Archaea	2157|Archaea	-	-	-	-	-	-	-	-	-	-	-	-	-	-	-
	NODE_965_length_14917_cov_2.021231_5	386456.JQKN01000016_gene909	2.77e-38	130.0	arCOG10257@1|root,arCOG10257@2157|Archaea	2157|Archaea	-	-	-	-	-	-	-	-	-	-	-	-	-	-	-
	NODE_965_length_14917_cov_2.021231_6	386456.JQKN01000016_gene909	8.16e-37	126.0	arCOG10257@1|root,arCOG10257@2157|Archaea	2157|Archaea	-	-	-	-	-	-	-	-	-	-	-	-	-	-	-
	NODE_965_length_14917_cov_2.021231_7	386456.JQKN01000016_gene908	0.0	895.0	COG0369@1|root,COG1773@1|root,arCOG02430@2157|Archaea,arCOG04391@2157|Archaea,2XV44@28890|Euryarchaeota,23NS7@183925|Methanobacteria	183925|Methanobacteria	C	Catalyzes the reduction of hydroxylamine to form NH(3) and H(2)O	hcp	-	1.7.99.1	ko:K05601	ko00910,map00910	-	R00143	RC02797	ko00000,ko00001,ko01000	-	-	-	Prismane,Rubredoxin
	NODE_965_length_14917_cov_2.021231_8	386456.JQKN01000016_gene907	3.5400000000000003e-32	112.0	arCOG10208@1|root,arCOG10208@2157|Archaea	2157|Archaea	-	-	-	-	-	-	-	-	-	-	-	-	-	-	-
	NODE_965_length_14917_cov_2.021231_9	868131.MSWAN_0873	3.4999999999999997e-68	211.0	arCOG11509@1|root,arCOG11509@2157|Archaea,2Y3KG@28890|Euryarchaeota	28890|Euryarchaeota	-	-	-	-	-	-	-	-	-	-	-	-	-	-	-
	NODE_965_length_14917_cov_2.021231_10	386456.JQKN01000016_gene906	3.3800000000000006e-27	100.0	COG1141@1|root,arCOG00349@2157|Archaea	2157|Archaea	C	Ferredoxin	fdxA	-	-	ko:K05337	-	-	-	-	ko00000	-	-	-	Fer4_13,Fer4_15
	NODE_965_length_14917_cov_2.021231_11	386456.JQKN01000016_gene905	1.12e-59	185.0	COG1917@1|root,arCOG03004@2157|Archaea,2XYUR@28890|Euryarchaeota,23P5U@183925|Methanobacteria	183925|Methanobacteria	S	Cupin domain	-	-	-	-	-	-	-	-	-	-	-	-	Cupin_2
	NODE_965_length_14917_cov_2.021231_12	386456.JQKN01000016_gene904	1.14e-112	332.0	COG1468@1|root,arCOG00793@2157|Archaea,2Y05J@28890|Euryarchaeota,23PN6@183925|Methanobacteria	183925|Methanobacteria	L	Domain of unknown function DUF83	-	-	3.1.12.1	ko:K07464	-	-	-	-	ko00000,ko01000,ko02048	-	-	-	Cas_Cas4
	NODE_965_length_14917_cov_2.021231_14	386456.JQKN01000016_gene902	1.26e-58	194.0	COG0460@1|root,arCOG01351@2157|Archaea,2XSWF@28890|Euryarchaeota,23NKT@183925|Methanobacteria	183925|Methanobacteria	E	homoserine dehydrogenase	-	-	1.1.1.3	ko:K00003	ko00260,ko00270,ko00300,ko01100,ko01110,ko01120,ko01130,ko01230,map00260,map00270,map00300,map01100,map01110,map01120,map01130,map01230	M00017,M00018	R01773,R01775	RC00087	ko00000,ko00001,ko00002,ko01000	-	-	-	ACT,Homoserine_dh,NAD_binding_3
	NODE_965_length_14917_cov_2.021231_15	386456.JQKN01000016_gene902	1.47e-107	321.0	COG0460@1|root,arCOG01351@2157|Archaea,2XSWF@28890|Euryarchaeota,23NKT@183925|Methanobacteria	183925|Methanobacteria	E	homoserine dehydrogenase	-	-	1.1.1.3	ko:K00003	ko00260,ko00270,ko00300,ko01100,ko01110,ko01120,ko01130,ko01230,map00260,map00270,map00300,map01100,map01110,map01120,map01130,map01230	M00017,M00018	R01773,R01775	RC00087	ko00000,ko00001,ko00002,ko01000	-	-	-	ACT,Homoserine_dh,NAD_binding_3
	NODE_965_length_14917_cov_2.021231_16	386456.JQKN01000016_gene902	4.23e-17	79.7	COG0460@1|root,arCOG01351@2157|Archaea,2XSWF@28890|Euryarchaeota,23NKT@183925|Methanobacteria	183925|Methanobacteria	E	homoserine dehydrogenase	-	-	1.1.1.3	ko:K00003	ko00260,ko00270,ko00300,ko01100,ko01110,ko01120,ko01130,ko01230,map00260,map00270,map00300,map01100,map01110,map01120,map01130,map01230	M00017,M00018	R01773,R01775	RC00087	ko00000,ko00001,ko00002,ko01000	-	-	-	ACT,Homoserine_dh,NAD_binding_3
	NODE_965_length_14917_cov_2.021231_17	386456.JQKN01000016_gene901	8.08e-186	523.0	COG1665@1|root,arCOG01831@2157|Archaea,2XVY6@28890|Euryarchaeota,23NTJ@183925|Methanobacteria	183925|Methanobacteria	S	DNA polymerase beta domain protein region	-	-	-	ko:K09717	-	-	-	-	ko00000	-	-	-	-
	NODE_965_length_14917_cov_2.021231_18	386456.JQKN01000016_gene895	1.49e-35	124.0	COG1661@1|root,arCOG04212@2157|Archaea,2Y26Z@28890|Euryarchaeota	28890|Euryarchaeota	S	Domain of unknown function (DUF296)	-	-	-	ko:K06934	-	-	-	-	ko00000	-	-	-	DUF296
	NODE_965_length_14917_cov_2.021231_19	386456.JQKN01000016_gene894	1.33e-98	290.0	COG2029@1|root,arCOG04875@2157|Archaea,2XV8B@28890|Euryarchaeota	28890|Euryarchaeota	S	Domain of unknown function (DUF366)	-	-	-	ko:K09139	-	-	-	-	ko00000	-	-	-	DUF366
	NODE_965_length_14917_cov_2.021231_20	386456.JQKN01000016_gene893	5.7199999999999995e-90	266.0	COG0720@1|root,arCOG02172@2157|Archaea,2XXFY@28890|Euryarchaeota,23PMK@183925|Methanobacteria	183925|Methanobacteria	H	6-pyruvoyl tetrahydropterin synthase	-	-	4.1.2.50,4.2.3.12	ko:K01737	ko00790,ko01100,map00790,map01100	M00842,M00843	R04286,R09959	RC01117,RC02846,RC02847	ko00000,ko00001,ko00002,ko01000,ko03016	-	-	-	PTPS
	NODE_965_length_14917_cov_2.021231_21	386456.JQKN01000016_gene892	4.9900000000000004e-117	340.0	COG0602@1|root,arCOG02173@2157|Archaea,2XUSP@28890|Euryarchaeota,23PJ3@183925|Methanobacteria	183925|Methanobacteria	H	Catalyzes the complex heterocyclic radical-mediated conversion of 6-carboxy-5,6,7,8-tetrahydropterin (CPH4) to 7- carboxy-7-deazaguanine (CDG), a step common to the biosynthetic pathways of all 7-deazapurine-containing compounds	queE	-	4.3.99.3	ko:K10026	ko00790,ko01100,map00790,map01100	-	R10002	RC02989	ko00000,ko00001,ko01000,ko03016	-	-	-	Fer4_12,Fer4_14,Radical_SAM
	NODE_965_length_14917_cov_2.021231_22	386456.JQKN01000016_gene891	3.07e-74	227.0	COG0517@1|root,arCOG00606@2157|Archaea,2XX11@28890|Euryarchaeota,23PS9@183925|Methanobacteria	183925|Methanobacteria	S	Domain in cystathionine beta-synthase and other proteins.	-	-	-	-	-	-	-	-	-	-	-	-	CBS
	NODE_818_length_17008_cov_1.409869_1	1528098.NOVO_04435	5.69e-45	152.0	COG2885@1|root,COG2885@2|Bacteria,1MZTV@1224|Proteobacteria,2U758@28211|Alphaproteobacteria,47FHB@766|Rickettsiales	766|Rickettsiales	M	Belongs to the ompA family	pal	-	-	ko:K03640	-	-	-	-	ko00000,ko02000	2.C.1.2	-	-	OmpA
	NODE_818_length_17008_cov_1.409869_2	588581.Cpap_4078	1.49e-87	264.0	COG0110@1|root,COG0110@2|Bacteria,1TPKX@1239|Firmicutes,249X2@186801|Clostridia,3WI5W@541000|Ruminococcaceae	186801|Clostridia	M	transferase hexapeptide repeat	vatD	-	-	ko:K18234	-	-	-	-	ko00000,ko01000,ko01504	-	-	-	Hexapep
	NODE_818_length_17008_cov_1.409869_3	315456.RF_0979	2.86e-296	827.0	COG0441@1|root,COG0441@2|Bacteria,1MUP2@1224|Proteobacteria,2TQWI@28211|Alphaproteobacteria,47EWK@766|Rickettsiales	766|Rickettsiales	J	Catalyzes the attachment of threonine to tRNA(Thr) in a two-step reaction L-threonine is first activated by ATP to form Thr-AMP and then transferred to the acceptor end of tRNA(Thr)	thrS	-	6.1.1.3	ko:K01868	ko00970,map00970	M00359,M00360	R03663	RC00055,RC00523	ko00000,ko00001,ko00002,ko01000,ko01007,ko03016	-	-	-	HGTP_anticodon,TGS,tRNA-synt_2b,tRNA_SAD
	NODE_818_length_17008_cov_1.409869_4	1415630.U771_12455	2.2e-21	93.2	COG2020@1|root,COG2020@2|Bacteria	2|Bacteria	O	methyltransferase activity	-	-	2.1.1.334	ko:K21310	ko00920,map00920	-	R11546	RC02653	ko00000,ko00001,ko01000	-	-	-	ICMT,PEMT
	NODE_818_length_17008_cov_1.409869_5	321846.PS417_08170	2.84e-06	56.6	COG0451@1|root,COG1898@1|root,COG0451@2|Bacteria,COG1898@2|Bacteria,1MXGB@1224|Proteobacteria,1RSK7@1236|Gammaproteobacteria	1236|Gammaproteobacteria	GM	COG0451 Nucleoside-diphosphate-sugar epimerases	fnlB	-	1.1.1.367	ko:K19068	-	-	-	-	ko00000,ko01000	-	-	-	Epimerase
	NODE_818_length_17008_cov_1.409869_6	272556.CF65_01934	5.95e-25	104.0	COG0406@1|root,COG0406@2|Bacteria,1QI3J@1224|Proteobacteria,1TFWU@1236|Gammaproteobacteria,1YADG@135625|Pasteurellales	135625|Pasteurellales	G	alpha-ribazole phosphatase activity	-	-	-	-	-	-	-	-	-	-	-	-	His_Phos_1
	NODE_818_length_17008_cov_1.409869_7	1415630.U771_12440	1.66e-18	83.6	COG0170@1|root,COG0170@2|Bacteria,1P1T8@1224|Proteobacteria,1SSR2@1236|Gammaproteobacteria	1236|Gammaproteobacteria	I	dolichyl monophosphate biosynthetic process	-	-	-	-	-	-	-	-	-	-	-	-	-
	NODE_818_length_17008_cov_1.409869_8	334545.CCMG01000014_gene1025	5.180000000000001e-66	206.0	COG3820@1|root,COG3820@2|Bacteria,1MVR2@1224|Proteobacteria,2TT8Z@28211|Alphaproteobacteria,47FAB@766|Rickettsiales	766|Rickettsiales	S	protein conserved in bacteria	-	-	-	ko:K09987	-	-	-	-	ko00000	-	-	-	DUF1013
	NODE_818_length_17008_cov_1.409869_9	1229204.AMYY01000020_gene484	2.12e-24	93.2	COG1278@1|root,COG1278@2|Bacteria,1N6Q5@1224|Proteobacteria,2UF6W@28211|Alphaproteobacteria	28211|Alphaproteobacteria	K	Cold shock	-	-	-	ko:K03704	-	-	-	-	ko00000,ko03000	-	-	-	CSD
	NODE_818_length_17008_cov_1.409869_10	334545.CCMG01000008_gene632	6.6e-40	150.0	COG1472@1|root,COG1472@2|Bacteria,1MVAJ@1224|Proteobacteria,2TRJK@28211|Alphaproteobacteria,47F5G@766|Rickettsiales	766|Rickettsiales	G	COG1472 Beta-glucosidase-related glycosidases	-	-	3.2.1.21,3.2.1.52	ko:K01207,ko:K05349	ko00460,ko00500,ko00520,ko00531,ko00940,ko01100,ko01110,ko01501,map00460,map00500,map00520,map00531,map00940,map01100,map01110,map01501	M00628	R00022,R00026,R02558,R02887,R02985,R03527,R04949,R04998,R05963,R07809,R07810,R10035,R10039,R10040,R10831	RC00049,RC00059,RC00171,RC00262,RC00397,RC00451,RC00714,RC00746,RC01248	ko00000,ko00001,ko00002,ko01000	-	GH3	-	Glyco_hydro_3
	NODE_818_length_17008_cov_1.409869_11	1528098.NOVO_03095	2.88e-71	223.0	COG0605@1|root,COG0605@2|Bacteria,1MVW2@1224|Proteobacteria,2TU3T@28211|Alphaproteobacteria,47F6P@766|Rickettsiales	766|Rickettsiales	C	radicals which are normally produced within the cells and which are toxic to biological systems	sodB	-	1.15.1.1	ko:K04564	ko04013,ko04068,ko04146,ko04211,ko04212,ko04213,ko05016,map04013,map04068,map04146,map04211,map04212,map04213,map05016	-	-	-	ko00000,ko00001,ko01000	-	-	-	Sod_Fe_C,Sod_Fe_N
	NODE_818_length_17008_cov_1.409869_12	272947.RP377	1.3000000000000001e-185	535.0	COG3202@1|root,COG3202@2|Bacteria,1MVS9@1224|Proteobacteria,2TSSJ@28211|Alphaproteobacteria,47G3D@766|Rickettsiales	766|Rickettsiales	P	Provides the rickettsial cell with host ATP in exchange for rickettsial ADP. This is an obligate exchange system. This energy acquiring activity is an important component of rickettsial parasitism	tlcB	GO:0005575,GO:0005623,GO:0005886,GO:0016020,GO:0044464,GO:0071944	-	-	-	-	-	-	-	-	-	-	TLC
	NODE_818_length_17008_cov_1.409869_13	334545.CCMG01000002_gene46	5.13e-62	199.0	COG0575@1|root,COG0575@2|Bacteria,1MWSV@1224|Proteobacteria,2U9ED@28211|Alphaproteobacteria,47FFH@766|Rickettsiales	766|Rickettsiales	I	COG0575 CDP-diglyceride synthetase	cdsA	-	2.7.7.41	ko:K00981	ko00564,ko01100,ko01110,ko04070,map00564,map01100,map01110,map04070	M00093	R01799	RC00002	ko00000,ko00001,ko00002,ko01000	-	-	-	CTP_transf_1
	NODE_818_length_17008_cov_1.409869_14	293613.A1E_03230	6.61e-66	210.0	COG0020@1|root,COG0020@2|Bacteria,1MVP1@1224|Proteobacteria,2TTVJ@28211|Alphaproteobacteria,47F9Q@766|Rickettsiales	766|Rickettsiales	H	Catalyzes the condensation of isopentenyl diphosphate (IPP) with allylic pyrophosphates generating different type of terpenoids	uppS	-	2.5.1.31	ko:K00806	ko00900,ko01110,map00900,map01110	-	R06447	RC00279,RC02839	ko00000,ko00001,ko01000,ko01006	-	-	-	Prenyltransf
	NODE_818_length_17008_cov_1.409869_15	1144888.CM001467_gene1054	2.34e-108	333.0	COG0642@1|root,COG2205@2|Bacteria,1MUAK@1224|Proteobacteria,2TQRE@28211|Alphaproteobacteria,47F4I@766|Rickettsiales	766|Rickettsiales	T	COG0642 Signal transduction histidine kinase	envZ	-	2.7.13.3	ko:K07638	ko02020,ko02026,map02020,map02026	M00445,M00742,M00743	-	-	ko00000,ko00001,ko00002,ko01000,ko01001,ko02022	-	-	-	HATPase_c,HisKA
	NODE_818_length_17008_cov_1.409869_16	293613.A1E_03220	2.73e-76	236.0	COG0745@1|root,COG0745@2|Bacteria,1MY3D@1224|Proteobacteria,2TSQF@28211|Alphaproteobacteria,47FD8@766|Rickettsiales	766|Rickettsiales	T	COG0745 Response regulators consisting of a CheY-like receiver domain and a winged-helix DNA-binding domain	ompR	-	-	ko:K07659	ko02020,ko02026,map02020,map02026	M00445,M00742,M00743	-	-	ko00000,ko00001,ko00002,ko02022	-	-	-	Response_reg,Trans_reg_C
	NODE_818_length_17008_cov_1.409869_17	357244.OTBS_0394	2.58e-85	263.0	COG0115@1|root,COG0115@2|Bacteria,1MVB0@1224|Proteobacteria,2TR1H@28211|Alphaproteobacteria,47FAZ@766|Rickettsiales	766|Rickettsiales	E	Belongs to the class-IV pyridoxal-phosphate-dependent aminotransferase family	ilvE	-	2.6.1.42	ko:K00826	ko00270,ko00280,ko00290,ko00770,ko01100,ko01110,ko01130,ko01210,ko01230,map00270,map00280,map00290,map00770,map01100,map01110,map01130,map01210,map01230	M00019,M00036,M00119,M00570	R01090,R01214,R02199,R10991	RC00006,RC00036	ko00000,ko00001,ko00002,ko01000,ko01007	-	-	-	Aminotran_4
	NODE_818_length_17008_cov_1.409869_18	336407.RBE_0740	1.35e-83	260.0	COG0329@1|root,COG0329@2|Bacteria,1MUCM@1224|Proteobacteria,2TR5W@28211|Alphaproteobacteria,47F5V@766|Rickettsiales	766|Rickettsiales	E	Catalyzes the condensation of (S)-aspartate-beta- semialdehyde (S)-ASA and pyruvate to 4-hydroxy- tetrahydrodipicolinate (HTPA)	dapA	-	4.3.3.7	ko:K01714	ko00261,ko00300,ko01100,ko01110,ko01120,ko01130,ko01230,map00261,map00300,map01100,map01110,map01120,map01130,map01230	M00016,M00525,M00526,M00527	R10147	RC03062,RC03063	ko00000,ko00001,ko00002,ko01000	-	-	-	DHDPS
	NODE_818_length_17008_cov_1.409869_19	357244.OTBS_1910	4.71e-49	166.0	COG1121@1|root,COG1121@2|Bacteria,1MUDW@1224|Proteobacteria,2TQUI@28211|Alphaproteobacteria,47F9W@766|Rickettsiales	766|Rickettsiales	P	Part of the ABC transporter complex ZnuABC involved in zinc import. Responsible for energy coupling to the transport system	znuC	-	-	ko:K09817	ko02010,map02010	M00242	-	-	ko00000,ko00001,ko00002,ko01000,ko02000	3.A.1.15.3,3.A.1.15.5	-	-	ABC_tran
	NODE_686_length_19211_cov_3.113289_1	386456.JQKN01000008_gene1585	1.55e-194	557.0	COG0028@1|root,COG1773@1|root,arCOG01999@2157|Archaea,arCOG04391@2157|Archaea,2XWG6@28890|Euryarchaeota,23PYA@183925|Methanobacteria	183925|Methanobacteria	CG	PFAM Thiamine pyrophosphate enzyme, C-terminal TPP-binding	-	-	1.2.3.3	ko:K00158	ko00620,ko01100,map00620,map01100	-	R00207	RC02745	ko00000,ko00001,ko01000	-	-	-	Rubredoxin,TPP_enzyme_C,TPP_enzyme_M,TPP_enzyme_N
	NODE_686_length_19211_cov_3.113289_2	877455.Metbo_2036	2.47e-24	102.0	COG0028@1|root,COG1773@1|root,arCOG01999@2157|Archaea,arCOG04391@2157|Archaea,2XWG6@28890|Euryarchaeota,23PYA@183925|Methanobacteria	183925|Methanobacteria	CG	PFAM Thiamine pyrophosphate enzyme, C-terminal TPP-binding	-	-	1.2.3.3	ko:K00158	ko00620,ko01100,map00620,map01100	-	R00207	RC02745	ko00000,ko00001,ko01000	-	-	-	Rubredoxin,TPP_enzyme_C,TPP_enzyme_M,TPP_enzyme_N
	NODE_686_length_19211_cov_3.113289_3	386456.JQKN01000008_gene1586	1.0500000000000001e-109	323.0	arCOG10246@1|root,arCOG10246@2157|Archaea	2157|Archaea	-	-	-	-	-	-	-	-	-	-	-	-	-	-	-
	NODE_686_length_19211_cov_3.113289_4	386456.JQKN01000008_gene1587	3.0399999999999997e-134	386.0	COG0382@1|root,arCOG00478@2157|Archaea	2157|Archaea	H	COG0382 4-hydroxybenzoate polyprenyltransferase and related prenyltransferases	-	-	-	-	-	-	-	-	-	-	-	-	UbiA
	NODE_686_length_19211_cov_3.113289_5	386456.JQKN01000008_gene1588	2.42e-237	658.0	COG0644@1|root,arCOG00570@2157|Archaea,2XU3J@28890|Euryarchaeota,23NM7@183925|Methanobacteria	183925|Methanobacteria	C	Is involved in the reduction of 2,3- digeranylgeranylglycerophospholipids (unsaturated archaeols) into 2,3-diphytanylglycerophospholipids (saturated archaeols) in the biosynthesis of archaeal membrane lipids. Catalyzes the formation of archaetidic acid (2,3-di-O-phytanyl-sn-glyceryl phosphate) from 2,3-di-O-geranylgeranylglyceryl phosphate (DGGGP) via the hydrogenation of each double bond of the …	-	-	1.3.1.101,1.3.7.11	ko:K17830	ko00564,map00564	-	R10325,R10326,R10331	RC03134	ko00000,ko00001,ko01000	-	-	-	FAD_binding_3
	NODE_686_length_19211_cov_3.113289_6	386456.JQKN01000008_gene1589	2.16e-32	112.0	COG1145@1|root,arCOG00958@2157|Archaea	2157|Archaea	C	PFAM 4Fe-4S ferredoxin, iron-sulfur binding domain protein	-	-	1.8.4.10,1.8.4.8	ko:K00390	ko00920,ko01100,ko01120,map00920,map01100,map01120	M00176	R02021	RC00007,RC02862	ko00000,ko00001,ko00002,ko01000	-	-	-	Fer4,PAPS_reduct
	NODE_686_length_19211_cov_3.113289_7	386456.JQKN01000008_gene1590	8.200000000000001e-22	85.9	arCOG07599@1|root,arCOG07599@2157|Archaea,2Y78H@28890|Euryarchaeota,23P9W@183925|Methanobacteria	183925|Methanobacteria	-	-	-	-	-	-	-	-	-	-	-	-	-	-	-
	NODE_686_length_19211_cov_3.113289_8	1220534.B655_1127	2.5700000000000002e-26	104.0	COG4300@1|root,arCOG11200@2157|Archaea,2Y21Z@28890|Euryarchaeota	28890|Euryarchaeota	P	PFAM Cadmium resistance transporter	-	-	-	-	-	-	-	-	-	-	-	-	Cad
	NODE_686_length_19211_cov_3.113289_10	868131.MSWAN_1163	3.48e-27	100.0	COG1873@1|root,arCOG02155@2157|Archaea	2157|Archaea	S	PRC-barrel domain protein	-	-	-	-	-	-	-	-	-	-	-	-	PRC
	NODE_686_length_19211_cov_3.113289_11	420247.Msm_1607	0.00076	40.8	arCOG07599@1|root,arCOG07599@2157|Archaea,2Y78H@28890|Euryarchaeota,23P9W@183925|Methanobacteria	183925|Methanobacteria	-	-	-	-	-	-	-	-	-	-	-	-	-	-	-
	NODE_686_length_19211_cov_3.113289_13	386456.JQKN01000008_gene1592	1.9400000000000001e-252	695.0	COG0641@1|root,arCOG00945@2157|Archaea,2XV96@28890|Euryarchaeota,23NRU@183925|Methanobacteria	183925|Methanobacteria	C	Iron-sulfur cluster-binding domain	-	-	-	ko:K06871	-	-	-	-	ko00000	-	-	-	Radical_SAM,SPASM
	NODE_686_length_19211_cov_3.113289_20	386456.JQKN01000008_gene1534	8.62e-36	127.0	COG3794@1|root,arCOG02926@2157|Archaea,2Y7QT@28890|Euryarchaeota	28890|Euryarchaeota	C	PFAM blue (type 1) copper domain protein	-	-	-	-	-	-	-	-	-	-	-	-	Copper-bind,Cupredoxin_1
	NODE_686_length_19211_cov_3.113289_21	877455.Metbo_0417	2.15e-15	70.1	arCOG10242@1|root,arCOG10242@2157|Archaea	2157|Archaea	-	-	-	-	-	-	-	-	-	-	-	-	-	-	-
	NODE_686_length_19211_cov_3.113289_24	386456.JQKN01000007_gene3372	1.74e-140	401.0	COG1637@1|root,arCOG01304@2157|Archaea,2XUC8@28890|Euryarchaeota,23P0F@183925|Methanobacteria	183925|Methanobacteria	L	Cleaves both 3' and 5' ssDNA extremities of branched DNA structures	nucS	-	-	ko:K07503	-	-	-	-	ko00000,ko01000	-	-	-	NucS
	NODE_686_length_19211_cov_3.113289_25	386456.JQKN01000010_gene623	3.97e-60	192.0	COG4635@1|root,arCOG00524@2157|Archaea,2Y41H@28890|Euryarchaeota	28890|Euryarchaeota	C	flavodoxin	-	-	-	-	-	-	-	-	-	-	-	-	Flavodoxin_5
	NODE_686_length_19211_cov_3.113289_26	386456.JQKN01000010_gene620	6.16e-90	267.0	COG4635@1|root,arCOG00524@2157|Archaea,2Y1YN@28890|Euryarchaeota	28890|Euryarchaeota	C	Flavodoxin domain	-	-	1.3.5.3	ko:K00230	ko00860,ko01100,ko01110,map00860,map01100,map01110	M00121	R09489	RC00885	ko00000,ko00001,ko00002,ko01000	-	-	-	Flavodoxin_5
	NODE_686_length_19211_cov_3.113289_27	868131.MSWAN_0248	2.67e-82	247.0	COG1846@1|root,arCOG03183@2157|Archaea,2Y3ZM@28890|Euryarchaeota	28890|Euryarchaeota	K	helix_turn_helix multiple antibiotic resistance protein	-	-	-	-	-	-	-	-	-	-	-	-	MarR_2
	NODE_673_length_19348_cov_4.322252_1	386456.JQKN01000002_gene2397	6.25e-28	105.0	arCOG10253@1|root,arCOG10253@2157|Archaea	2157|Archaea	-	-	-	-	-	-	-	-	-	-	-	-	-	-	-
	NODE_673_length_19348_cov_4.322252_2	386456.JQKN01000002_gene2398	0.0	1212.0	COG1202@1|root,arCOG03143@2157|Archaea,2Y86H@28890|Euryarchaeota,23PZG@183925|Methanobacteria	183925|Methanobacteria	S	helicase superfamily c-terminal domain	-	-	-	ko:K03725	-	-	-	-	ko00000,ko01000	-	-	-	DEAD,Helicase_C
	NODE_673_length_19348_cov_4.322252_3	386456.JQKN01000002_gene2399	7.25e-120	347.0	COG1402@1|root,arCOG04536@2157|Archaea,2XW42@28890|Euryarchaeota,23P22@183925|Methanobacteria	183925|Methanobacteria	H	Catalyzes the hydrolysis of the formamide of 2-amino-5- formylamino-6-ribosylamino-4(3H)-pyrimidinone 5'-monophosphate (FAPy) to form 2,5-diamino-6-ribosylamino-4(3H)-pyrimidinone 5'- phosphate (APy)	arfB	-	3.5.1.102	ko:K14653	ko00740,ko01100,map00740,map01100	-	R09374	RC00263,RC00323	ko00000,ko00001,ko01000	-	-	-	Creatininase
	NODE_673_length_19348_cov_4.322252_4	386456.JQKN01000002_gene2400	1.32e-78	237.0	COG2016@1|root,arCOG00985@2157|Archaea,2XX1R@28890|Euryarchaeota,23P33@183925|Methanobacteria	183925|Methanobacteria	J	Domain of unknown function (DUF1947)	-	-	-	ko:K07575	-	-	-	-	ko00000	-	-	-	DUF1947,PUA
	NODE_673_length_19348_cov_4.322252_5	868131.MSWAN_0917	8.679999999999999e-23	95.1	COG1710@1|root,COG2771@1|root,arCOG03351@2157|Archaea,arCOG05671@2157|Archaea,2Y0T0@28890|Euryarchaeota,23P8K@183925|Methanobacteria	183925|Methanobacteria	K	quorum sensing	-	-	-	-	-	-	-	-	-	-	-	-	HTH_7
	NODE_673_length_19348_cov_4.322252_7	386456.JQKN01000001_gene1640	2.39e-87	283.0	COG2203@1|root,arCOG06940@1|root,arCOG02361@2157|Archaea,arCOG06940@2157|Archaea,2Y7VY@28890|Euryarchaeota	28890|Euryarchaeota	T	Histidine kinase	-	-	-	-	-	-	-	-	-	-	-	-	HATPase_c,HisKA_2
	NODE_673_length_19348_cov_4.322252_8	386456.JQKN01000014_gene3108	1.14e-51	171.0	arCOG06536@1|root,arCOG06536@2157|Archaea	2157|Archaea	T	PAS domain	-	-	-	-	-	-	-	-	-	-	-	-	HATPase_c,HisKA_2,PAS,PAS_3,PAS_9,Response_reg
	NODE_673_length_19348_cov_4.322252_9	386456.JQKN01000002_gene2396	2.54e-106	316.0	COG0784@1|root,arCOG02386@2157|Archaea	2157|Archaea	T	response regulator, receiver	-	-	-	-	-	-	-	-	-	-	-	-	BAT,GAF_2,HATPase_c,HTH_10,HisKA,HisKA_2,PAS_4,PAS_9,Response_reg
	NODE_673_length_19348_cov_4.322252_10	386456.JQKN01000002_gene2393	0.0	974.0	COG0449@1|root,arCOG00057@2157|Archaea,2XTC0@28890|Euryarchaeota,23NRN@183925|Methanobacteria	183925|Methanobacteria	M	Catalyzes the first step in hexosamine metabolism, converting fructose-6P into glucosamine-6P using glutamine as a nitrogen source	glmS	-	2.6.1.16	ko:K00820	ko00250,ko00520,ko01100,ko01130,ko04931,map00250,map00520,map01100,map01130,map04931	-	R00768	RC00010,RC00163,RC02752	ko00000,ko00001,ko01000,ko01002	-	-	-	GATase_6,SIS
	NODE_673_length_19348_cov_4.322252_11	386456.JQKN01000002_gene2392	1.43e-149	424.0	COG0152@1|root,arCOG04421@2157|Archaea,2XUKC@28890|Euryarchaeota,23NU0@183925|Methanobacteria	183925|Methanobacteria	F	SAICAR synthetase	purC	-	6.3.2.6	ko:K01923	ko00230,ko01100,ko01110,ko01130,map00230,map01100,map01110,map01130	M00048	R04591	RC00064,RC00162	ko00000,ko00001,ko00002,ko01000	-	-	-	SAICAR_synt
	NODE_673_length_19348_cov_4.322252_12	386456.JQKN01000002_gene2391	8.03e-43	140.0	COG1828@1|root,arCOG04462@2157|Archaea,2XYPB@28890|Euryarchaeota	28890|Euryarchaeota	F	Part of the phosphoribosylformylglycinamidine synthase complex involved in the purines biosynthetic pathway. Catalyzes the ATP-dependent conversion of formylglycinamide ribonucleotide (FGAR) and glutamine to yield formylglycinamidine ribonucleotide (FGAM) and glutamate. The FGAM synthase complex is composed of three subunits. PurQ produces an ammonia molecule by converting glutamine to glutamate.…	purS	-	6.3.5.3	ko:K01952	ko00230,ko01100,ko01110,ko01130,map00230,map01100,map01110,map01130	M00048	R04463	RC00010,RC01160	ko00000,ko00001,ko00002,ko01000	-	-	-	PurS
	NODE_673_length_19348_cov_4.322252_13	386456.JQKN01000002_gene2390	1.97e-148	418.0	COG0047@1|root,arCOG00102@2157|Archaea,2XTPA@28890|Euryarchaeota,23NK1@183925|Methanobacteria	183925|Methanobacteria	F	Part of the phosphoribosylformylglycinamidine synthase complex involved in the purines biosynthetic pathway. Catalyzes the ATP-dependent conversion of formylglycinamide ribonucleotide (FGAR) and glutamine to yield formylglycinamidine ribonucleotide (FGAM) and glutamate. The FGAM synthase complex is composed of three subunits. PurQ produces an ammonia molecule by converting glutamine to glutamate.…	purQ	-	6.3.5.3	ko:K01952	ko00230,ko01100,ko01110,ko01130,map00230,map01100,map01110,map01130	M00048	R04463	RC00010,RC01160	ko00000,ko00001,ko00002,ko01000	-	-	-	GATase_5
	NODE_673_length_19348_cov_4.322252_14	386456.JQKN01000002_gene2389	2.25e-136	389.0	COG0007@1|root,arCOG00644@2157|Archaea,2XTE1@28890|Euryarchaeota,23NTE@183925|Methanobacteria	183925|Methanobacteria	H	Uroporphyrin-III C-methyltransferase	cobA	-	2.1.1.107	ko:K02303	ko00860,ko01100,ko01110,ko01120,map00860,map01100,map01110,map01120	M00121	R03194	RC00003,RC00871	ko00000,ko00001,ko00002,ko01000	-	-	-	TP_methylase
	NODE_673_length_19348_cov_4.322252_15	386456.JQKN01000002_gene2388	2.34e-145	414.0	COG1587@1|root,arCOG02048@2157|Archaea,2XTA1@28890|Euryarchaeota,23NZX@183925|Methanobacteria	183925|Methanobacteria	H	synthase	hemD	-	4.2.1.75	ko:K01719	ko00860,ko01100,ko01110,ko01120,map00860,map01100,map01110,map01120	M00121	R03165	RC01861	ko00000,ko00001,ko00002,ko01000	-	-	-	HEM4
	NODE_673_length_19348_cov_4.322252_16	386456.JQKN01000002_gene2387	2.04e-41	137.0	COG1400@1|root,arCOG01217@2157|Archaea,2XYV0@28890|Euryarchaeota,23P73@183925|Methanobacteria	183925|Methanobacteria	U	Involved in targeting and insertion of nascent membrane proteins into the cytoplasmic membrane. Binds directly to 7S RNA and mediates binding of the 54 kDa subunit of the SRP	srp19	-	-	ko:K03105	ko03060,map03060	-	-	-	ko00000,ko00001,ko02044	3.A.5.7,3.A.5.9	-	-	SRP19
	NODE_673_length_19348_cov_4.322252_17	386456.JQKN01000002_gene2386	6.480000000000001e-273	754.0	COG0608@1|root,arCOG00427@2157|Archaea,2XT8Y@28890|Euryarchaeota,23NMN@183925|Methanobacteria	183925|Methanobacteria	L	DHHA1 domain	recJ2	-	-	ko:K07463	-	-	-	-	ko00000	-	-	-	DHHA1
	NODE_673_length_19348_cov_4.322252_18	386456.JQKN01000002_gene2383	1.53e-95	285.0	COG1497@1|root,arCOG04399@2157|Archaea,2XU16@28890|Euryarchaeota,23NXU@183925|Methanobacteria	183925|Methanobacteria	K	Transcriptional regulator	-	-	-	ko:K07730	-	-	-	-	ko00000,ko03000	-	-	-	HTH_24
	NODE_673_length_19348_cov_4.322252_19	386456.JQKN01000002_gene2382	1.84e-159	452.0	COG1829@1|root,arCOG04263@2157|Archaea,2XST6@28890|Euryarchaeota,23P1W@183925|Methanobacteria	183925|Methanobacteria	S	GHMP kinases N terminal domain	coaA	-	2.7.1.169	ko:K06982	ko00770,ko01100,map00770,map01100	-	R09378	RC00002,RC00017	ko00000,ko00001,ko01000	-	-	-	GHMP_kinases_N
	NODE_673_length_19348_cov_4.322252_20	386456.JQKN01000002_gene2381	9.55e-40	137.0	COG1387@1|root,arCOG00304@2157|Archaea,2XVZY@28890|Euryarchaeota,23NXR@183925|Methanobacteria	183925|Methanobacteria	E	DNA polymerase alpha chain like domain	-	-	-	ko:K04477	-	-	-	-	ko00000	-	-	-	PHP
	NODE_663_length_19456_cov_1.872575_1	386456.JQKN01000002_gene2764	7.89e-08	51.6	COG3476@1|root,arCOG04434@2157|Archaea,2XYQD@28890|Euryarchaeota	28890|Euryarchaeota	T	COG3476 Tryptophan-rich sensory protein (mitochondrial benzodiazepine receptor homolog)	tspO	GO:0003674,GO:0005488,GO:0005575,GO:0006725,GO:0006807,GO:0008150,GO:0008152,GO:0009987,GO:0016020,GO:0016021,GO:0031224,GO:0033013,GO:0044237,GO:0044425,GO:0046483,GO:0046906,GO:0071704,GO:0097159,GO:1901360,GO:1901363,GO:1901564	-	ko:K05770	ko04080,ko04214,ko04979,ko05166,map04080,map04214,map04979,map05166	-	-	-	ko00000,ko00001,ko02000	9.A.24	-	-	TspO_MBR
	NODE_663_length_19456_cov_1.872575_3	386456.JQKN01000002_gene2765	1.43e-166	473.0	COG1683@1|root,arCOG04848@2157|Archaea,2XV91@28890|Euryarchaeota	28890|Euryarchaeota	S	Protein of unknown function (DUF1722)	-	-	-	-	-	-	-	-	-	-	-	-	DUF1722,DUF523
	NODE_663_length_19456_cov_1.872575_4	926561.KB900621_gene2825	4.4400000000000005e-194	553.0	COG0415@1|root,COG0415@2|Bacteria,1UDZT@1239|Firmicutes,249FJ@186801|Clostridia,3WAHJ@53433|Halanaerobiales	186801|Clostridia	L	PFAM DNA photolyase	phr	-	4.1.99.3	ko:K01669	-	-	-	-	ko00000,ko01000,ko03400	-	-	-	DNA_photolyase
	NODE_663_length_19456_cov_1.872575_5	386456.JQKN01000002_gene2767	6.32e-94	280.0	COG1268@1|root,arCOG02986@2157|Archaea,2XWSG@28890|Euryarchaeota,23P3Q@183925|Methanobacteria	183925|Methanobacteria	S	BioY family	-	-	-	ko:K03523	ko02010,map02010	M00581,M00582	-	-	ko00000,ko00001,ko00002,ko02000	2.A.88.1,2.A.88.2	-	-	BioY
	NODE_663_length_19456_cov_1.872575_6	573064.Mefer_1528	9.82e-38	131.0	COG3543@1|root,arCOG04456@2157|Archaea,2Y0PQ@28890|Euryarchaeota	28890|Euryarchaeota	S	Protein of unknown function (DUF1284)	-	-	-	ko:K09706	-	-	-	-	ko00000	-	-	-	DUF1284
	NODE_663_length_19456_cov_1.872575_7	386456.JQKN01000002_gene2771	1.84e-137	394.0	arCOG04883@1|root,arCOG04883@2157|Archaea,2XZSU@28890|Euryarchaeota	28890|Euryarchaeota	-	-	-	-	-	-	-	-	-	-	-	-	-	-	-
	NODE_663_length_19456_cov_1.872575_8	386456.JQKN01000002_gene2772	5.5e-278	783.0	arCOG14005@1|root,arCOG14005@2157|Archaea,2Y53I@28890|Euryarchaeota,23PWJ@183925|Methanobacteria	183925|Methanobacteria	S	Fusaric acid resistance protein-like	-	-	-	-	-	-	-	-	-	-	-	-	FUSC_2
	NODE_663_length_19456_cov_1.872575_9	877455.Metbo_1675	2.47e-78	243.0	arCOG01151@1|root,arCOG01151@2157|Archaea	2157|Archaea	S	Calcineurin-like phosphoesterase	-	-	-	-	-	-	-	-	-	-	-	-	Metallophos,Metallophos_2
	NODE_663_length_19456_cov_1.872575_10	868131.MSWAN_0533	8.58e-52	173.0	COG3548@1|root,arCOG04887@2157|Archaea	2157|Archaea	S	integral membrane protein	-	-	-	-	-	-	-	-	-	-	-	-	DUF1211
	NODE_663_length_19456_cov_1.872575_11	386456.JQKN01000002_gene2773	1.26e-204	570.0	COG0040@1|root,arCOG02208@2157|Archaea,2Y32G@28890|Euryarchaeota,23PBA@183925|Methanobacteria	183925|Methanobacteria	E	PFAM ATP phosphoribosyltransferase	-	-	-	-	-	-	-	-	-	-	-	-	HisG
	NODE_663_length_19456_cov_1.872575_12	386456.JQKN01000004_gene106	2.51e-246	705.0	COG0610@1|root,arCOG00878@2157|Archaea,2XSZ2@28890|Euryarchaeota,23PAR@183925|Methanobacteria	183925|Methanobacteria	V	Type I restriction and modification enzyme - subunit R C terminal	-	-	-	-	-	-	-	-	-	-	-	-	EcoR124_C
	NODE_663_length_19456_cov_1.872575_13	386456.JQKN01000004_gene106	6.790000000000001e-160	479.0	COG0610@1|root,arCOG00878@2157|Archaea,2XSZ2@28890|Euryarchaeota,23PAR@183925|Methanobacteria	183925|Methanobacteria	V	Type I restriction and modification enzyme - subunit R C terminal	-	-	-	-	-	-	-	-	-	-	-	-	EcoR124_C
	NODE_663_length_19456_cov_1.872575_14	386456.JQKN01000004_gene108	1.07e-95	293.0	COG0286@1|root,arCOG02632@2157|Archaea,2XUMY@28890|Euryarchaeota,23PCG@183925|Methanobacteria	183925|Methanobacteria	V	HsdM N-terminal domain	-	-	2.1.1.72	ko:K03427	-	-	-	-	ko00000,ko01000,ko02048	-	-	-	HsdM_N,N6_Mtase
	NODE_663_length_19456_cov_1.872575_15	386456.JQKN01000004_gene108	3.59e-170	488.0	COG0286@1|root,arCOG02632@2157|Archaea,2XUMY@28890|Euryarchaeota,23PCG@183925|Methanobacteria	183925|Methanobacteria	V	HsdM N-terminal domain	-	-	2.1.1.72	ko:K03427	-	-	-	-	ko00000,ko01000,ko02048	-	-	-	HsdM_N,N6_Mtase
	NODE_663_length_19456_cov_1.872575_16	714943.Mucpa_5983	9.46e-64	215.0	COG0732@1|root,COG0732@2|Bacteria,4NRJY@976|Bacteroidetes,1IZBF@117747|Sphingobacteriia	976|Bacteroidetes	V	Type I restriction modification DNA specificity domain	-	-	3.1.21.3	ko:K01154	-	-	-	-	ko00000,ko01000,ko02048	-	-	-	Methylase_S
	NODE_663_length_19456_cov_1.872575_17	386456.JQKN01000004_gene109	4.67e-16	78.2	COG0732@1|root,arCOG02626@2157|Archaea,2Y6C3@28890|Euryarchaeota,23PNB@183925|Methanobacteria	183925|Methanobacteria	V	Type I restriction modification DNA specificity domain	-	-	3.1.21.3	ko:K01154	-	-	-	-	ko00000,ko01000,ko02048	-	-	-	Methylase_S
	NODE_663_length_19456_cov_1.872575_19	420247.Msm_0540	3.68e-67	227.0	COG2865@1|root,arCOG03296@2157|Archaea,2XV8V@28890|Euryarchaeota,23PRP@183925|Methanobacteria	183925|Methanobacteria	K	Transcriptional regulator	-	-	3.6.4.12	ko:K03655	ko03440,map03440	-	-	-	ko00000,ko00001,ko01000,ko03400	-	-	-	AlbA_2,DUF4062,HATPase_c_4
	NODE_663_length_19456_cov_1.872575_20	420247.Msm_1315	2.75e-20	88.6	COG2865@1|root,arCOG03296@2157|Archaea,2XV8V@28890|Euryarchaeota,23PRP@183925|Methanobacteria	183925|Methanobacteria	K	Transcriptional regulator	-	-	3.6.4.12	ko:K03655	ko03440,map03440	-	-	-	ko00000,ko00001,ko01000,ko03400	-	-	-	AlbA_2,HATPase_c_4
	NODE_663_length_19456_cov_1.872575_21	386456.JQKN01000004_gene112	1.0099999999999999e-89	266.0	COG1715@1|root,arCOG09740@2157|Archaea,2XWIT@28890|Euryarchaeota,23PJ7@183925|Methanobacteria	183925|Methanobacteria	V	Domain of unknown function (DUF1802)	-	-	-	-	-	-	-	-	-	-	-	-	DUF1802
	NODE_663_length_19456_cov_1.872575_22	386456.JQKN01000004_gene187	4.44e-133	390.0	COG4883@1|root,arCOG04432@2157|Archaea,2XU48@28890|Euryarchaeota,23PA1@183925|Methanobacteria	183925|Methanobacteria	S	Uncharacterized protein conserved in archaea (DUF2193)	-	-	-	-	-	-	-	-	-	-	-	-	DUF2193
	NODE_598_length_20756_cov_1.899850_1	877455.Metbo_1504	1.11e-45	150.0	COG1305@1|root,arCOG02486@2157|Archaea	2157|Archaea	E	S53, subtilisin kexin sedolisin	-	-	-	-	-	-	-	-	-	-	-	-	-
	NODE_598_length_20756_cov_1.899850_2	386456.JQKN01000017_gene830	8.49e-13	62.8	arCOG03886@1|root,arCOG03886@2157|Archaea	2157|Archaea	-	-	-	-	-	-	-	-	-	-	-	-	-	-	RHH_6
	NODE_598_length_20756_cov_1.899850_3	386456.JQKN01000017_gene851	9.33e-81	253.0	arCOG03622@1|root,arCOG03622@2157|Archaea,2Y55W@28890|Euryarchaeota	28890|Euryarchaeota	-	-	-	-	-	-	-	-	-	-	-	-	-	-	-
	NODE_598_length_20756_cov_1.899850_4	386456.JQKN01000005_gene487	1.93e-24	101.0	COG0342@1|root,arCOG03055@2157|Archaea,2XU5A@28890|Euryarchaeota,23NSV@183925|Methanobacteria	183925|Methanobacteria	U	Protein-export membrane protein SecD	secD	-	-	ko:K03072	ko03060,ko03070,map03060,map03070	M00335	-	-	ko00000,ko00001,ko00002,ko02044	2.A.6.4,3.A.5.2,3.A.5.7	-	-	SecD_SecF,Sec_GG
	NODE_598_length_20756_cov_1.899850_7	386456.JQKN01000004_gene224	8.21e-53	182.0	COG0382@1|root,arCOG00481@2157|Archaea	2157|Archaea	H	COG0382 4-hydroxybenzoate polyprenyltransferase and related prenyltransferases	ubiA3	-	2.5.1.39	ko:K03179	ko00130,ko01100,ko01110,map00130,map01100,map01110	M00117	R05000,R05615	RC00209,RC02895	ko00000,ko00001,ko00002,ko01000,ko01006	-	-	-	UbiA
	NODE_598_length_20756_cov_1.899850_8	386456.JQKN01000007_gene3402	7.339999999999999e-199	559.0	COG2605@1|root,arCOG01030@2157|Archaea	2157|Archaea	S	GHMP kinases N terminal domain	-	-	2.7.1.168	ko:K07031	ko00540,map00540	-	R09770	RC00002,RC00078	ko00000,ko00001,ko01000	-	-	-	GHMP_kinases_C,GHMP_kinases_N
	NODE_598_length_20756_cov_1.899850_9	877455.Metbo_1301	2.89e-246	686.0	arCOG02685@1|root,arCOG02685@2157|Archaea,2XV10@28890|Euryarchaeota	28890|Euryarchaeota	G	COG0477 Permeases of the major facilitator superfamily	csbC	-	-	-	-	-	-	-	-	-	-	-	Sugar_tr
	NODE_598_length_20756_cov_1.899850_10	1220534.B655_0015	1.76e-155	442.0	COG0385@1|root,arCOG02191@2157|Archaea,2XWY8@28890|Euryarchaeota,23PU2@183925|Methanobacteria	183925|Methanobacteria	S	Sodium Bile acid symporter family	-	-	-	ko:K03453	-	-	-	-	ko00000	2.A.28	-	-	SBF
	NODE_598_length_20756_cov_1.899850_13	877455.Metbo_1576	1.29e-43	157.0	COG0417@1|root,arCOG00328@2157|Archaea,2XU1K@28890|Euryarchaeota,23NV0@183925|Methanobacteria	183925|Methanobacteria	L	DNA polymerase, family B, exonuclease domain	-	-	2.7.7.7	ko:K02319	ko00230,ko00240,ko01100,ko03030,map00230,map00240,map01100,map03030	-	R00375,R00376,R00377,R00378	RC02795	ko00000,ko00001,ko01000,ko03032	-	-	-	DNA_pol_B,DNA_pol_B_exo1
	NODE_598_length_20756_cov_1.899850_14	1220534.B655_1301	4.07e-154	456.0	COG0417@1|root,arCOG00328@2157|Archaea,2XU1K@28890|Euryarchaeota,23NV0@183925|Methanobacteria	183925|Methanobacteria	L	DNA polymerase, family B, exonuclease domain	polB1	-	2.7.7.7	ko:K02319	ko00230,ko00240,ko01100,ko03030,map00230,map00240,map01100,map03030	-	R00375,R00376,R00377,R00378	RC02795	ko00000,ko00001,ko01000,ko03032	-	-	-	DNA_pol_B,DNA_pol_B_exo1
	NODE_598_length_20756_cov_1.899850_17	877455.Metbo_1675	1.92e-92	278.0	arCOG01151@1|root,arCOG01151@2157|Archaea	2157|Archaea	S	Calcineurin-like phosphoesterase	-	-	-	-	-	-	-	-	-	-	-	-	Metallophos,Metallophos_2
	NODE_598_length_20756_cov_1.899850_19	1127695.HMPREF9163_00566	2.42e-09	58.2	COG2333@1|root,COG2333@2|Bacteria,1UK07@1239|Firmicutes	1239|Firmicutes	S	competence protein COMEC	-	-	-	-	-	-	-	-	-	-	-	-	-
	NODE_598_length_20756_cov_1.899850_20	370438.PTH_2401	4.55e-31	124.0	COG2333@1|root,COG2333@2|Bacteria,1UK07@1239|Firmicutes,24VVN@186801|Clostridia	186801|Clostridia	S	competence protein COMEC	-	-	-	-	-	-	-	-	-	-	-	-	-
	NODE_553_length_21891_cov_1.578065_1	334545.CCMG01000027_gene1606	5.72e-10	57.0	COG3293@1|root,COG3293@2|Bacteria	2|Bacteria	L	Transposase	-	-	-	-	-	-	-	-	-	-	-	-	DDE_Tnp_1,DDE_Tnp_1_2,DUF4096
	NODE_553_length_21891_cov_1.578065_2	1144888.CM001467_gene789	2.17e-155	457.0	COG0305@1|root,COG0305@2|Bacteria,1MUG9@1224|Proteobacteria,2TSF9@28211|Alphaproteobacteria,47F12@766|Rickettsiales	766|Rickettsiales	L	it exhibits DNA-dependent ATPase activity and contains distinct active sites for ATP binding, DNA binding, and interaction with DnaC protein, primase, and other prepriming proteins	dnaB	-	3.6.4.12	ko:K02314	ko03030,ko04112,map03030,map04112	-	-	-	ko00000,ko00001,ko01000,ko03032	-	-	-	DnaB,DnaB_C
	NODE_553_length_21891_cov_1.578065_3	272951.rsib_orf623	1.4200000000000002e-129	375.0	COG2877@1|root,COG2877@2|Bacteria,1MV91@1224|Proteobacteria,2TRJX@28211|Alphaproteobacteria,47EY9@766|Rickettsiales	766|Rickettsiales	M	Belongs to the KdsA family	kdsA	-	2.5.1.55	ko:K01627	ko00540,ko01100,map00540,map01100	M00063	R03254	RC00435	ko00000,ko00001,ko00002,ko01000,ko01005	-	-	-	DAHP_synth_1
	NODE_553_length_21891_cov_1.578065_4	293614.A1C_00595	9.82e-22	88.6	COG1314@1|root,COG1314@2|Bacteria,1NJ1D@1224|Proteobacteria,2UJYU@28211|Alphaproteobacteria,47FSY@766|Rickettsiales	766|Rickettsiales	U	Involved in protein export. Participates in an early event of protein translocation (By similarity)	secG	-	-	ko:K03075	ko02024,ko03060,ko03070,map02024,map03060,map03070	M00335	-	-	ko00000,ko00001,ko00002,ko02044	3.A.5.1,3.A.5.2	-	-	SecG
	NODE_553_length_21891_cov_1.578065_5	357244.OTBS_0140	6.96e-32	123.0	COG0149@1|root,COG0149@2|Bacteria,1MWK5@1224|Proteobacteria,2TS6I@28211|Alphaproteobacteria,47FEY@766|Rickettsiales	766|Rickettsiales	G	Involved in the gluconeogenesis. Catalyzes stereospecifically the conversion of dihydroxyacetone phosphate (DHAP) to D-glyceraldehyde-3-phosphate (G3P)	tpiA	-	5.3.1.1	ko:K01803	ko00010,ko00051,ko00562,ko00710,ko01100,ko01110,ko01120,ko01130,ko01200,ko01230,map00010,map00051,map00562,map00710,map01100,map01110,map01120,map01130,map01200,map01230	M00001,M00002,M00003	R01015	RC00423	ko00000,ko00001,ko00002,ko01000,ko04147	-	-	-	TIM
	NODE_553_length_21891_cov_1.578065_6	452659.RrIowa_1353	1.5e-192	546.0	COG0112@1|root,COG0112@2|Bacteria,1MUIS@1224|Proteobacteria,2TQKT@28211|Alphaproteobacteria,47F0T@766|Rickettsiales	766|Rickettsiales	E	Catalyzes the reversible interconversion of serine and glycine with tetrahydrofolate (THF) serving as the one-carbon carrier. This reaction serves as the major source of one-carbon groups required for the biosynthesis of purines, thymidylate, methionine, and other important biomolecules. Also exhibits THF- independent aldolase activity toward beta-hydroxyamino acids, producing glycine and aldehyd…	glyA	-	2.1.2.1	ko:K00600	ko00260,ko00460,ko00630,ko00670,ko00680,ko01100,ko01110,ko01120,ko01130,ko01200,ko01230,ko01523,map00260,map00460,map00630,map00670,map00680,map01100,map01110,map01120,map01130,map01200,map01230,map01523	M00140,M00141,M00346,M00532	R00945,R09099	RC00022,RC00112,RC01583,RC02958	ko00000,ko00001,ko00002,ko01000	-	-	-	SHMT
	NODE_553_length_21891_cov_1.578065_7	331869.BAL199_25524	3.63e-46	154.0	COG1327@1|root,COG1327@2|Bacteria,1RE7V@1224|Proteobacteria,2U75W@28211|Alphaproteobacteria,4BQDA@82117|unclassified Alphaproteobacteria	28211|Alphaproteobacteria	K	Negatively regulates transcription of bacterial ribonucleotide reductase nrd genes and operons by binding to NrdR- boxes	nrdR	-	-	ko:K07738	-	-	-	-	ko00000,ko03000	-	-	-	ATP-cone
	NODE_553_length_21891_cov_1.578065_8	1380391.JIAS01000013_gene3549	4.75e-147	433.0	COG1104@1|root,COG1104@2|Bacteria,1MU1C@1224|Proteobacteria,2TSQE@28211|Alphaproteobacteria,2JPHR@204441|Rhodospirillales	204441|Rhodospirillales	E	Master enzyme that delivers sulfur to a number of partners involved in Fe-S cluster assembly, tRNA modification or cofactor biosynthesis. Catalyzes the removal of elemental sulfur atoms from cysteine to produce alanine. Functions as a sulfur delivery protein for Fe-S cluster synthesis onto IscU, an Fe-S scaffold assembly protein, as well as other S acceptor proteins	iscS	-	2.8.1.7	ko:K04487	ko00730,ko01100,ko04122,map00730,map01100,map04122	-	R07460,R11528,R11529	RC01789,RC02313	ko00000,ko00001,ko01000,ko02048,ko03016,ko03029	-	-	-	Aminotran_5
	NODE_553_length_21891_cov_1.578065_9	334545.CCMG01000026_gene1594	1.4200000000000002e-213	623.0	COG0507@1|root,COG0507@2|Bacteria,1MW43@1224|Proteobacteria,2TQWC@28211|Alphaproteobacteria,47EZE@766|Rickettsiales	766|Rickettsiales	L	DNA-dependent ATPase and ATP-dependent 5'-3' DNA helicase. Has no activity on blunt DNA or DNA with 3'-overhangs, requires at least 10 bases of 5'-ssDNA for helicase activity	recD2	-	3.1.11.5	ko:K03581	ko03440,map03440	-	-	-	ko00000,ko00001,ko01000,ko03400	-	-	-	AAA_30,HHH_4,HHH_5,UvrD_C_2
	NODE_553_length_21891_cov_1.578065_10	1144888.CM001467_gene1041	3.68e-37	129.0	COG0858@1|root,COG0858@2|Bacteria,1PRXZ@1224|Proteobacteria,2V45H@28211|Alphaproteobacteria,47FSW@766|Rickettsiales	766|Rickettsiales	J	One of several proteins that assist in the late maturation steps of the functional core of the 30S ribosomal subunit. Associates with free 30S ribosomal subunits (but not with 30S subunits that are part of 70S ribosomes or polysomes). Required for efficient processing of 16S rRNA. May interact with the 5'-terminal helix region of 16S rRNA	rbfA	-	-	ko:K02834	-	-	-	-	ko00000,ko03009	-	-	-	RBFA
	NODE_553_length_21891_cov_1.578065_11	315456.RF_0816	1.81e-84	263.0	COG1619@1|root,COG1619@2|Bacteria,1MWIY@1224|Proteobacteria,2U2WH@28211|Alphaproteobacteria,47GPS@766|Rickettsiales	766|Rickettsiales	V	LD-carboxypeptidase	mccF2	-	-	-	-	-	-	-	-	-	-	-	Peptidase_S66
	NODE_553_length_21891_cov_1.578065_12	315456.RF_0985	6.14e-75	249.0	COG1538@1|root,COG1538@2|Bacteria,1MWCJ@1224|Proteobacteria,2TR3S@28211|Alphaproteobacteria,47FGW@766|Rickettsiales	766|Rickettsiales	MU	COG1538 Outer membrane protein	tolC	-	-	ko:K12340	ko01501,ko01503,ko02020,ko03070,ko04626,ko05133,map01501,map01503,map02020,map03070,map04626,map05133	M00325,M00326,M00339,M00571,M00575,M00646,M00647,M00696,M00697,M00709,M00720,M00821	-	-	ko00000,ko00001,ko00002,ko01504,ko02000,ko02044	1.B.17,2.A.6.2	-	-	OEP
	NODE_553_length_21891_cov_1.578065_13	272951.rsib_orf397	2.43e-11	64.3	COG3827@1|root,COG3827@2|Bacteria,1NH58@1224|Proteobacteria,2UK7U@28211|Alphaproteobacteria,47FUR@766|Rickettsiales	766|Rickettsiales	S	protein conserved in bacteria	-	-	-	ko:K09991	-	-	-	-	ko00000	-	-	-	DUF2497
	NODE_553_length_21891_cov_1.578065_14	334545.CCMG01000015_gene1227	1.22e-05	50.8	COG0666@1|root,COG0666@2|Bacteria	2|Bacteria	G	response to abiotic stimulus	-	-	-	ko:K06867	-	-	-	-	ko00000	-	-	-	Ank_4
	NODE_553_length_21891_cov_1.578065_15	336407.RBE_1002	1.3499999999999999e-68	220.0	COG4974@1|root,COG4974@2|Bacteria,1MVNF@1224|Proteobacteria,2TRAA@28211|Alphaproteobacteria,47F6H@766|Rickettsiales	766|Rickettsiales	L	Belongs to the 'phage' integrase family	xerD	-	-	ko:K04763	-	-	-	-	ko00000,ko03036	-	-	-	Phage_int_SAM_1,Phage_integrase
	NODE_553_length_21891_cov_1.578065_16	1144888.CM001467_gene551	7.66e-66	207.0	COG0694@1|root,COG0694@2|Bacteria,1MVQ1@1224|Proteobacteria,2TUD1@28211|Alphaproteobacteria,47F9H@766|Rickettsiales	766|Rickettsiales	O	COG0694 Thioredoxin-like proteins and domains	-	-	-	-	-	-	-	-	-	-	-	-	Nfu_N,NifU
	NODE_553_length_21891_cov_1.578065_17	1528098.NOVO_07670	2.6099999999999997e-61	192.0	COG1734@1|root,COG1734@2|Bacteria,1RD08@1224|Proteobacteria,2U74V@28211|Alphaproteobacteria,47FBY@766|Rickettsiales	766|Rickettsiales	T	Transcription factor that acts by binding directly to the RNA polymerase (RNAP). Required for negative regulation of rRNA expression and positive regulation of several amino acid biosynthesis promoters	dksA	-	-	ko:K06204	ko02026,map02026	-	-	-	ko00000,ko00001,ko03000,ko03009,ko03021	-	-	-	zf-dskA_traR
	NODE_553_length_21891_cov_1.578065_18	336407.RBE_0177	2.8099999999999996e-115	342.0	COG4974@1|root,COG4974@2|Bacteria,1QU6A@1224|Proteobacteria,2TS7W@28211|Alphaproteobacteria,47F59@766|Rickettsiales	766|Rickettsiales	L	Site-specific tyrosine recombinase, which acts by catalyzing the cutting and rejoining of the recombining DNA molecules. The XerC-XerD complex is essential to convert dimers of the bacterial chromosome into monomers to permit their segregation at cell division. It also contributes to the segregational stability of plasmids	xerC	-	-	ko:K03733	-	-	-	-	ko00000,ko03036	-	-	-	Phage_int_SAM_1,Phage_integrase
	NODE_553_length_21891_cov_1.578065_19	1121861.KB899912_gene937	9.8e-18	77.4	COG3750@1|root,COG3750@2|Bacteria,1N77J@1224|Proteobacteria,2UFX6@28211|Alphaproteobacteria,2JTUS@204441|Rhodospirillales	204441|Rhodospirillales	S	Belongs to the UPF0335 family	-	-	-	-	-	-	-	-	-	-	-	-	DUF2312
	NODE_553_length_21891_cov_1.578065_20	293613.A1E_05380	7.18e-14	68.2	COG1872@1|root,COG1872@2|Bacteria,1NGWG@1224|Proteobacteria,2UKJF@28211|Alphaproteobacteria	28211|Alphaproteobacteria	S	Belongs to the UPF0235 family	-	-	-	ko:K09131	-	-	-	-	ko00000	-	-	-	DUF167
	NODE_553_length_21891_cov_1.578065_21	293613.A1E_02220	3.1100000000000002e-47	163.0	COG1214@1|root,COG1214@2|Bacteria,1MXPH@1224|Proteobacteria,2TTM2@28211|Alphaproteobacteria,47FPG@766|Rickettsiales	766|Rickettsiales	O	COG1214 Inactive homolog of metal-dependent proteases	-	-	-	-	-	-	-	-	-	-	-	-	Peptidase_M22
	NODE_553_length_21891_cov_1.578065_22	336407.RBE_1355	1.4e-215	611.0	COG3202@1|root,COG3202@2|Bacteria,1MVS9@1224|Proteobacteria,2TSSJ@28211|Alphaproteobacteria,47EX6@766|Rickettsiales	766|Rickettsiales	C	Provides the rickettsial cell with host ATP in exchange for rickettsial ADP. This is an obligate exchange system. This energy acquiring activity is an important component of rickettsial parasitism	tlc1	GO:0005575,GO:0005623,GO:0005886,GO:0006810,GO:0006811,GO:0006820,GO:0006862,GO:0008150,GO:0015711,GO:0015748,GO:0015865,GO:0015867,GO:0015868,GO:0015893,GO:0015931,GO:0016020,GO:0042221,GO:0042493,GO:0044464,GO:0050896,GO:0051179,GO:0051234,GO:0051503,GO:0071702,GO:0071705,GO:0071944,GO:1901264	-	ko:K03301	-	-	-	-	ko00000	2.A.12	-	-	TLC
	NODE_553_length_21891_cov_1.578065_23	452659.RrIowa_0409	1.42e-98	298.0	COG0774@1|root,COG0774@2|Bacteria,1MV6T@1224|Proteobacteria,2TUHH@28211|Alphaproteobacteria,47F79@766|Rickettsiales	766|Rickettsiales	M	Catalyzes the hydrolysis of UDP-3-O-myristoyl-N- acetylglucosamine to form UDP-3-O-myristoylglucosamine and acetate, the committed step in lipid A biosynthesis	lpxC	-	3.5.1.108	ko:K02535	ko00540,ko01100,map00540,map01100	M00060	R04587	RC00166,RC00300	ko00000,ko00001,ko00002,ko01000,ko01005	-	-	-	LpxC
	NODE_553_length_21891_cov_1.578065_24	336407.RBE_1132	1.7000000000000002e-74	229.0	COG0233@1|root,COG0233@2|Bacteria,1N66T@1224|Proteobacteria,2U5B2@28211|Alphaproteobacteria,47FAI@766|Rickettsiales	766|Rickettsiales	J	Responsible for the release of ribosomes from messenger RNA at the termination of protein biosynthesis. May increase the efficiency of translation by recycling ribosomes from one round of translation to another	frr	-	-	ko:K02838	-	-	-	-	ko00000,ko03012	-	-	-	RRF
