# Supplementary material
Source: Research Square preprint supplement (doi:10.21203/rs.3.rs-8743768/v1)
Supplement: Supplementary file 4 [file e2a36c561f41584c832ad36e.xlsx]

## Sheet: Summary
PROTEIN	TargetP 2.0	DeepLoc 2.1
LEG_mgen_SDR_llike_NODE_312_length_28720_cov_31.279719_-_ORF_11__frame_2__translation	OTHER	Mitochondrion|Endoplasmic reticulum
LEG_SDR_like_NODE_5587_length_957_cov_1.322398_g4726_i0_-_ORF_1__frame_1__translation	mTP	Mitochondrion|Endoplasmic reticulum
LEG_2OGMC_NODE_4889_length_1036_cov_4.713396_g4064_i0_-_ORF_1__frame_1__translation	OTHER	Mitochondrion
LEG_2OGMC_NODE_5262_length_992_cov_12.812840_g4417_i0_-_ORF_1__frame_3__translation	OTHER	Mitochondrion
LEG_2OGMC_NODE_5815_length_932_cov_17.351572_g4941_i0_-_ORF_1__frame_1__translation	OTHER	Mitochondrion
LEG_AAC_NODE_4433_length_1098_cov_45.525854_g3633_i0_-_ORF_1__frame_2__translation	OTHER	Mitochondrion
LEG_AAC_NODE_6009_length_913_cov_2.578571_g5127_i0_-_ORF_1__frame_1__translation	OTHER	Mitochondrion
LEG_AAC_NODE_6732_length_848_cov_11.069677_g5822_i0_-_ORF_1__frame_2__translation	OTHER	Mitochondrion
LEG_AAC_NODE_7228_length_808_cov_3.068027_g6299_i0_-_ORF_1__frame_3__translation	OTHER	Mitochondrion
LEG_AADH_NODE_2409_length_1546_cov_13.942974_g1752_i0_-_ORF_1__frame_2__translation	mTP	Mitochondrion
LEG_AADH_NODE_2489_length_1520_cov_13.541120_g1817_i0_-_ORF_1__frame_2__translation	mTP	Mitochondrion
LEG_AAT_NODE_2375_length_1561_cov_19.768817_g1723_i0_-_ORF_1__frame_1__translation	OTHER	Mitochondrion
LEG_ACAT_NODE_3053_length_1349_cov_29.074451_g2325_i0_-_ORF_1__frame_1__translation	OTHER	Mitochondrion
LEG_ACAT_NODE_3276_length_1299_cov_20.355628_g2541_i0_-_ORF_1__frame_3__translation	mTP	Mitochondrion
LEG_ACC_NODE_4307_length_1115_cov_3.511516_g3514_i0_-_ORF_1__frame_2__translation	OTHER	Mitochondrion
LEG_ACTE_NODE_12614_length_534_cov_16.075922_g11507_i0_-_ORF_1__frame_1__translation	OTHER	Mitochondrion
LEG_AK_NODE_7992_length_754_cov_19.512482_g7033_i0_-_ORF_1__frame_2__translation	OTHER	Mitochondrion
LEG_ASCT_NODE_2346_length_1569_cov_54.854278_g1695_i0_-_ORF_1__frame_2__translation	OTHER	Mitochondrion
LEG_ASCT_NODE_2408_length_1546_cov_31.947047_g1751_i0_-_ORF_1__frame_2__translation	mTP	Mitochondrion
LEG_AST_NODE_1652_length_9363_cov_23.758553_-_ORF_5__frame_1__translation	mTP	Mitochondrion
LEG_DnaJ_NODE_6246_length_892_cov_3.452991_g5350_i0_-_ORF_1__frame_2__translation	OTHER	Mitochondrion
LEG_ENO_NODE_2519_length_1508_cov_13.321254_g1843_i0_-_ORF_1__frame_2__translation	mTP	Mitochondrion
LEG_ENO_NODE_2595_length_1480_cov_15.297797_g1904_i0_-_ORF_1__frame_2__translation	mTP	Mitochondrion
LEG_FUM_NODE_2454_length_1533_cov_6.770548_g1787_i0_-_ORF_1__frame_3__translation	OTHER	Mitochondrion
LEG_GCSH_NODE_18455_length_384_cov_9_633441_g17335_i0_translation_frame_2_reverse	OTHER	Mitochondrion
LEG_GCST_NODE_3560_length_1244_cov_7.789069_g2813_i0_-_ORF_1__frame_1__translation	mTP	Mitochondrion
LEG_GcvP_NODE_995_length_3055_cov_7.581489_g566_i0_-_ORF_1__frame_1__translation	mTP	Mitochondrion
LEG_GDH_NODE_2144_length_1663_cov_7.514465_g1519_i0_translation	OTHER	Mitochondrion
LEG_GDH_NODE_2427_length_1542_cov_5.198094_g1766_i0_-_ORF_1__frame_1__translation	mTP	Mitochondrion
LEG_GrpE_NODE_5589_length_956_cov_5.771234_g4728_i0_-_ORF_1__frame_2__translation	OTHER	Mitochondrion
LEG_HIBADH_NODE_5234_length_995_cov_105.456616_g4390_i0_-_ORF_1__frame_1__translation	OTHER	Mitochondrion
LEG_HIBADH_NODE_5721_length_941_cov_7.737327_g4851_i0_-_ORF_1__frame_3__translation	OTHER	Mitochondrion
LEG_Hsp10_NODE_17382_length_405_cov_3.415663_g16264_i0_-_BLAST_Hit_translation	OTHER	Mitochondrion
LEG_HSP60_NODE_1866_length_1812_cov_14.726279_g1275_i0_-_ORF_1__frame_3__translation	mTP	Mitochondrion
LEG_HSP60_NODE_1910_length_1786_cov_8.406305_g1311_i0_-_ORF_1__frame_1__translation	mTP	Mitochondrion
LEG_HSP60_NODE_1923_length_1780_cov_24.185120_g1324_i0_-_ORF_1__frame_1__translation	mTP	Mitochondrion
LEG_IscU_NODE_13193_length_515_cov_2.194570_g12086_i0_-_ORF_1__frame_3__translation	OTHER	Mitochondrion
LEG_MDH_NODE_4799_length_1050_cov_20.103378_g3983_i0_-_ORF_1__frame_1__translation	mTP	Mitochondrion
LEG_mgen_2OGMC_NODE_82_length_43555_cov_76.820646_-_ORF_11__frame_1__translation	OTHER	Mitochondrion
LEG_mgen_2OGMC_NODE_132_length_37501_cov_21.001953_-_ORF_13__frame_2__translation	OTHER	Mitochondrion
LEG_mgen_2OGMC_NODE_5580_length_2296_cov_30.212079_-_ORF_1__frame_1__translation	OTHER	Mitochondrion
LEG_mgen_AAC_NODE_391_length_26035_cov_42.379419_-_ORF_19__frame_3__translation	OTHER	Mitochondrion
LEG_mgen_AAC_NODE_1641_length_9412_cov_35.674744_-_ORF_1__frame_1__translation	OTHER	Mitochondrion
LEG_mgen_AAC_NODE_4136_length_3270_cov_6.534203_-_ORF_1__frame_1__translation	SP	Mitochondrion
LEG_mgen_AAC_NODE_5072_length_2548_cov_30.002478_-_ORF_1__frame_1__translation	SP	Mitochondrion
LEG_mgen_AAC_NODE_11147_length_1013_cov_16.349887_-_ORF_1__frame_1__translation	OTHER	Mitochondrion
LEG_mgen_AADH_NODE_274_length_30393_cov_26.575861_-_ORF_19__frame_2__translation	mTP	Mitochondrion
LEG_mgen_AADH_NODE_1097_length_13586_cov_46.319860_-_ORF_6__frame_2__translation	mTP	Mitochondrion
LEG_mgen_AADH_NODE_1728_length_8887_cov_37.692237_-_ORF_3__frame_1__translation	mTP	Mitochondrion
LEG_mgen_AAT_NODE_1415_length_10876_cov_21.302726_-_ORF_5__frame_2__translation	OTHER	Mitochondrion
LEG_mgen_AAT_NODE_4017_length_3368_cov_15.482567_-_ORF_2__frame_2__translation	mTP	Mitochondrion
LEG_mgen_ACAT_NODE_362_length_26914_cov_65.016986_-_ORF_17__frame_3__translation	mTP	Mitochondrion
LEG_mgen_ACAT_NODE_3195_length_4410_cov_37.295821_-_ORF_1__frame_3__translation	mTP	Mitochondrion
LEG_mgen_ACO_NODE_178_length_35019_cov_33.063711_-_ORF_16__frame_3__-_ORF_16__frame_3__translation	OTHER	Mitochondrion
LEG_mgen_ACTE_NODE_236_length_31873_cov_75.083570_-_ORF_13__frame_3__translation	OTHER	Mitochondrion
LEG_mgen_AK_NODE_77_length_45294_cov_32.430624_-_ORF_11__frame_3__translation	OTHER	Mitochondrion
LEG_mgen_ALDH_NODE_1285_length_11878_cov_31.064760_-_ORF_1__frame_1__translation	mTP	Mitochondrion
LEG_mgen_ALT_NODE_706_length_18828_cov_30.452168_extraction_-_ORF_1__frame_1__translation	mTP	Mitochondrion
LEG_mgen_ASCT_part_NODE_276_length_30293_cov_79.957701_extraction_-_ORF_1__frame_1__translation	OTHER	Mitochondrion
LEG_mgen_ASCT_part_NODE_1268_length_12016_cov_26.709816_extraction_-_ORF_1__frame_1__translation	OTHER	Mitochondrion
LEG_mgen_AST_NODE_1652_length_9363_cov_23.758553_-_ORF_5__frame_1__translation	mTP	Mitochondrion
LEG_mgen_ATM1_NODE_1346_length_11345_cov_19.851132_-_ORF_4__frame_2__translation	OTHER	Mitochondrion
LEG_mgen_ATM1_NODE_1346_length_11345_cov_19.851132_-_ORF_5__frame_3__translation	OTHER	Mitochondrion
LEG_mgen_DnaJ_NODE_1992_length_7566_cov_32.690415_-_ORF_1__frame_2__translation	OTHER	Mitochondrion
LEG_mgen_ENO_NODE_65_length_47509_cov_73.692774_-_ORF_16__frame_1__translation	mTP	Mitochondrion
LEG_mgen_ENO_NODE_4411_length_3023_cov_6.426796_-_ORF_1__frame_1__translation	mTP	Mitochondrion
LEG_mgen_FD_NODE_171_length_35524_cov_58.425290_-_ORF_9__frame_2__translation	OTHER	Mitochondrion
LEG_mgen_GCSH_NODE_1529_length_10084_cov_26.315356_-_ORF_1__frame_1__translation	mTP	Mitochondrion
LEG_mgen_GrpE_NODE_3631_length_3825_cov_26.270957_-_ORF_1__frame_1__translation	OTHER	Mitochondrion
LEG_mgen_Grx5_NODE_1171_length_12773_cov_25.783093_-_ORF_7__frame_2__translation	OTHER	Mitochondrion
LEG_mgen_HIBADH_NODE_1228_length_12335_cov_24.135403_-_ORF_4__frame_2__translation	mTP	Mitochondrion
LEG_mgen_HIBADH_NODE_1523_length_10122_cov_156.550775_-_ORF_6__frame_2__translation	OTHER	Mitochondrion
LEG_mgen_Hsp10_NODE_594_length_20920_cov_73.855865_-_BLAST_Hit_translation	OTHER	Mitochondrion
LEG_mgen_HSP60_part_NODE_112_length_39695_cov_53.418116_-_ORF_24__frame_2__translation	mTP	Mitochondrion
LEG_mgen_HSP60_part_NODE_286_length_29807_cov_20.664724_extraction_-_ORF_2__frame_1__translation	mTP	Mitochondrion
LEG_mgen_HSP60_part_NODE_1174_length_12742_cov_78.553151_-_ORF_5__frame_3__translation	mTP	Mitochondrion
LEG_mgen_IBD_NODE_69_length_47303_cov_60.392509_-_ORF_26__frame_3__translation	OTHER	Mitochondrion
LEG_mgen_IscS_NODE_108_length_39859_cov_13.047569_-_ORF_21__frame_2__translation	mTP	Mitochondrion
LEG_mgen_IscU_NODE_161_length_35944_cov_36.994249_-_BLAST_Hit_translation	mTP	Mitochondrion
LEG_mgen_MMC_NODE_195_length_33929_cov_32.090498_-_ORF_18__frame_1__translation	OTHER	Mitochondrion
LEG_mgen_MMC_NODE_473_length_23674_cov_52.060347_-_ORF_5__frame_2__translation	OTHER	Mitochondrion
LEG_mgen_MMC_NODE_2192_length_6848_cov_61.480881_-_ORF_1__frame_1__translation	OTHER	Mitochondrion
LEG_mgen_MMC_NODE_2584_length_5622_cov_30.987625_-_ORF_3__frame_3__translation	OTHER	Mitochondrion
LEG_mgen_MMSDH_NODE_410_length_25549_cov_96.807922_-_BLAST_Hit_translation	mTP	Mitochondrion
LEG_mgen_MPPb_NODE_2682_length_5403_cov_33.628127_-_ORF_2__frame_1__translation	OTHER	Mitochondrion
LEG_mgen_OGDH_E1_NODE_31_length_55051_cov_38.129725_-_ORF_7__frame_3__translation	OTHER	Mitochondrion
LEG_mgen_P5CDH_NODE_1525_length_10101_cov_46.353519_-_ORF_1__frame_1__translation	OTHER	Mitochondrion
LEG_mgen_PEPCK_NODE_237_length_31860_cov_85.227965_-_ORF_3__frame_3__translation	OTHER	Mitochondrion
LEG_mgen_PEPCK_NODE_2609_length_5574_cov_48.547274_-_ORF_5__frame_2__translation	mTP	Mitochondrion
LEG_mgen_PGM_NODE_1211_length_12457_cov_37.998459_-_ORF_7__frame_3__translation	OTHER	Mitochondrion
LEG_mgen_PGM_NODE_1470_length_10501_cov_32.028533_-_ORF_4__frame_3__translation	mTP	Mitochondrion
LEG_mgen_PhoE-like_NODE_173_length_35505_cov_53.301148_-_ORF_19__frame_2__translation	OTHER	Mitochondrion
LEG_mgen_PhoE-like_NODE_1043_length_14157_cov_64.104847_-_ORF_9__frame_3__translation	OTHER	Mitochondrion
LEG_mgen_PRDH_NODE_393_length_25950_cov_52.985981_-_ORF_16__frame_2__translation	OTHER	Mitochondrion
LEG_mgen_SCSa_NODE_274_length_30393_cov_26.575861_-_ORF_5__frame_1__translation	mTP	Mitochondrion
LEG_mgen_SCSa_NODE_1097_length_13586_cov_46.319860_-_ORF_8__frame_3__translation	mTP	Mitochondrion
LEG_mgen_SCSa_NODE_4725_length_2769_cov_26.689629_-_ORF_1__frame_3__translation	mTP	Mitochondrion
LEG_mgen_SCSb_NODE_55_length_49034_cov_58.625902_-_ORF_5__frame_2__translation	mTP	Mitochondrion
LEG_mgen_SCSb_NODE_543_length_22092_cov_90.334305_-_ORF_1__frame_1__translation	mTP	Mitochondrion
LEG_mgen_SCSb_NODE_3492_length_3991_cov_15.695652_-_ORF_1__frame_3__translation	mTP	Mitochondrion
LEG_mgen_SDHa_NODE_3787_length_3611_cov_7.977038_-_ORF_1__frame_2__translation	mTP	Mitochondrion
LEG_mgen_SLC25_NODE_30_length_57405_cov_65.237456_-_ORF_24__frame_2__translation	OTHER	Mitochondrion
LEG_mgen_SLC25_NODE_1486_length_10356_cov_40.212533_-_ORF_7__frame_3__translation	OTHER	Mitochondrion
LEG_mgen_SLC25_NODE_2107_length_7113_cov_36.517320_-_ORF_2__frame_2__translation	OTHER	Mitochondrion
LEG_mgen_SOD_NODE_510_length_22814_cov_23.352449_-_ORF_5__frame_2__translation	OTHER	Mitochondrion
LEG_mgen_YMC_NODE_131_length_37631_cov_105.652597_-_ORF_16__frame_1__translation	OTHER	Mitochondrion
LEG_mgen_YMC_NODE_853_length_16423_cov_20.564556_-_ORF_9__frame_2__translation	OTHER	Mitochondrion
LEG_mgen_YMC_NODE_1121_length_13360_cov_65.188468_-_ORF_6__frame_2__translation	OTHER	Mitochondrion
LEG_MMC_NODE_2741_length_1438_cov_2.306960_g2041_i0_-_ORF_1__frame_2__translation	OTHER	Mitochondrion
LEG_MMC_NODE_4913_length_1034_cov_2.605619_g4088_i0_-_ORF_1__frame_1__translation	OTHER	Mitochondrion
LEG_MMC_NODE_6448_length_875_cov_5.821696_g5547_i0_-_ORF_1__frame_2__translation	OTHER	Mitochondrion
LEG_MMC_NODE_6469_length_873_cov_14.866250_g5567_i0_-_ORF_1__frame_1__translation	OTHER	Mitochondrion
LEG_MMSDH_NODE_2163_length_1653_cov_13.353165_g1536_i0_-_ORF_1__frame_3__translation	mTP	Mitochondrion
LEG_OGDH_E2_NODE_2254_length_1611_cov_6.205462_g1617_i0_-_ORF_2__frame_2__translation	mTP	Mitochondrion
LEG_P5CDH_NODE_2059_length_1707_cov_20.753366_g1438_i0_-_ORF_1__frame_3__translation	OTHER	Mitochondrion
LEG_PDH_E2_NODE_2254_length_1611_cov_6.205462_g1617_i0_-_ORF_2__frame_2__translation	mTP	Mitochondrion
LEG_PEPCK_NODE_1659_length_1973_cov_27.742105_g1098_i0_-_ORF_1__frame_2__translation	OTHER	Mitochondrion
LEG_PGM_NODE_6632_length_859_cov_10.136132_g5725_i0_-_ORF_1__frame_1__translation	OTHER	Mitochondrion
LEG_PhoE-like_NODE_6449_length_875_cov_3.465087_g5548_i0_-_ORF_1__frame_2__translation	OTHER	Mitochondrion
LEG_SCSa_NODE_4242_length_1125_cov_7.781369_g3451_i0_-_ORF_2__frame_1__translation	mTP	Mitochondrion
LEG_SCSa_NODE_4722_length_1059_cov_11.561866_g3907_i0_-_ORF_2__frame_1__translation	mTP	Mitochondrion
LEG_SCSa_NODE_5473_length_969_cov_7.498884_g4618_i0_-_ORF_1__frame_2__translation	OTHER	Mitochondrion
LEG_SCSb_NODE_2248_length_1615_cov_5.557069_g1613_i0_-_ORF_2__frame_1__translation	OTHER	Mitochondrion
LEG_SLC25_NODE_3918_length_1177_cov_5.454710_g3149_i0_-_ORF_1__frame_2__translation	OTHER	Mitochondrion
LEG_SLC25_NODE_5413_length_976_cov_3.466224_g4561_i0_-_ORF_1__frame_2__translation	OTHER	Mitochondrion
LEG_SLC25_NODE_6213_length_895_cov_2.989051_g5319_i0_-_ORF_1__frame_1__translation	OTHER	Mitochondrion
LEG_unknown_protein_NODE_8069_length_749_cov_2.137574_g7109_i0_-_ORF_1__frame_3__translation	OTHER	Mitochondrion
LEG_YMC_NODE_6385_length_881_cov_2.500000_g5485_i0_-_ORF_1__frame_2__translation	OTHER	Mitochondrion
LEG_YMC_NODE_8751_length_709_cov_2.073899_g7720_i0_-_ORF_1__frame_1__translation	OTHER	Mitochondrion
LEG_YMC_NODE_9080_length_690_cov_4.118314_g8024_i0_-_ORF_1__frame_1__translation	OTHER	Mitochondrion
SIVAB_2OGMC_NODE_8991_length_1017_cov_11.353933_g8044_i0_-_ORF_1__frame_1__translation	OTHER	Mitochondrion
SIVAB_2OGMC_NODE_9604_length_965_cov_16.159905_g8606_i0_-_ORF_1__frame_2__translation	OTHER	Mitochondrion
SIVAB_2OGMC_NODE_18160_length_510_cov_5.485640_g16819_i0_-_ORF_1__frame_1__translation	OTHER	Mitochondrion
SIVAB_AAC_NODE_11027_length_857_cov_22.538356_g9944_i0_-_ORF_1__frame_1__translation	OTHER	Mitochondrion
SIVAB_AADH_NODE_4952_length_1469_cov_1.046200_g4354_i0_-_ORF_1__frame_1__translation	mTP	Mitochondrion
SIVAB_AAT_NODE_694_length_3165_cov_3.864384_g570_i0_-_ORF_2__frame_3__translation	OTHER	Mitochondrion
SIVAB_ALDH_NODE_4161_length_1602_cov_7.536271_g3632_i0_-_ORF_1__frame_2__translation	mTP	Mitochondrion
SIVAB_ALDH_NODE_4434_length_1550_cov_1.234013_g3880_i0_-_ORF_1__frame_3__translation	OTHER	Mitochondrion
SIVAB_ASCT_NODE_4606_length_1522_cov_2.020789_g4038_i0_-_ORF_1__frame_3__translation	mTP	Mitochondrion
SIVAB_AST_NODE_8593_length_1052_cov_4.808649_g7682_i0_-_ORF_1__frame_2__translation	mTP	Mitochondrion
SIVAB_ATM1_NODE_2559_length_1985_cov_1.922497_g2207_i0_-_ORF_1__frame_2__translation	mTP	Mitochondrion
SIVAB_E2_NODE_5092_length_1449_cov_2.684569_g4475_i0_-_ORF_1__frame_1__translation	mTP	Mitochondrion
SIVAB_GCSH_part_NODE_16695_length_560_cov_4.147806_g15389_i0_translation_frame_1_reverse	OTHER	Mitochondrion
SIVAB_GCSL_part_NODE_4745_length_1500_cov_0.693372_g4170_i0_-_ORF_1__frame_2__translation	OTHER	Mitochondrion
SIVAB_GCST_NODE_7246_length_1185_cov_3.310964_g6427_i0_-_ORF_1__frame_2__translation	OTHER	Mitochondrion
SIVAB_GcvP_NODE_710_length_3142_cov_13.304809_g585_i0_-_ORF_1__frame_2__translation	OTHER	Mitochondrion
SIVAB_GcvP_NODE_1733_length_2306_cov_17.332263_g585_i1_-_ORF_1__frame_2__translation	OTHER	Mitochondrion
SIVAB_GDH_NODE_4952_length_1469_cov_1.046200_g4354_i0_-_ORF_1__frame_1__translation	mTP	Mitochondrion
SIVAB_HIBADH_NODE_386_length_3744_cov_12.737075_g298_i0_-_ORF_2__frame_2__translation	OTHER	Mitochondrion
SIVAB_Hsp10_NODE_19711_length_463_cov_15.919643_g18341_i0_-_BLAST_Hit_translation	mTP	Mitochondrion
SIVAB_HSP60_NODE_4760_length_1497_cov_33.027737_g4184_i0_-_ORF_1__frame_1__translation	OTHER	Mitochondrion
SIVAB_IscS_NODE_5386_length_1410_cov_0.915822_g4749_i0_-_ORF_1__frame_1__translation	OTHER	Mitochondrion
SIVAB_MDH_NODE_7705_length_1139_cov_19.993083_g6859_i0_-_ORF_1__frame_2__translation	mTP	Mitochondrion
SIVAB_MDH_NODE_9327_length_988_cov_25.130081_g8352_i0_-_ORF_1__frame_3__translation	mTP	Mitochondrion
SIVAB_MMC_NODE_5745_length_1363_cov_3.026699_g5073_i0_-_ORF_1__frame_3__translation	OTHER	Mitochondrion
SIVAB_MMC_NODE_11623_length_814_cov_1.751092_g10511_i0_-_ORF_1__frame_2__translation	OTHER	Mitochondrion
SIVAB_MMC_NODE_11684_length_810_cov_2.436310_g10567_i0_-_ORF_1__frame_2__translation	OTHER	Mitochondrion
SIVAB_MMC_NODE_11685_length_810_cov_2.260615_g10567_i1_-_ORF_1__frame_2__translation	OTHER	Mitochondrion
SIVAB_MMSDH_NODE_3851_length_1657_cov_11.724183_g3352_i0_-_ORF_1__frame_2__translation	OTHER	Mitochondrion
SIVAB_MPPa_NODE_377_length_3780_cov_5.963592_g290_i0_-_ORF_2__frame_2__translation	mTP	Mitochondrion
SIVAB_PDH_E1a_NODE_5399_length_1408_cov_8.437158_g4762_i0_-_ORF_1__frame_1__translation	OTHER	Mitochondrion
SIVAB_PDH_E2_NODE_5092_length_1449_cov_2.684569_g4475_i0_-_ORF_1__frame_1__translation	mTP	Mitochondrion
SIVAB_PEPCK_NODE_2502_length_2005_cov_162.067093_g2156_i0_-_ORF_1__frame_2__translation	OTHER	Mitochondrion
SIVAB_PEPCK_NODE_2544_length_1990_cov_146.420290_g2156_i1_-_ORF_1__frame_2__translation	OTHER	Mitochondrion
SIVAB_PGM_NODE_10687_length_882_cov_28.018543_g9624_i0_-_ORF_1__frame_2__translation	mTP	Mitochondrion
SIVAB_PhoE-like_NODE_10564_length_891_cov_3.630890_g9506_i0_-_ORF_1__frame_1__translation	OTHER	Mitochondrion
SIVAB_PhoE-like_NODE_11200_length_843_cov_1.976257_g10108_i0_-_ORF_1__frame_3__translation	OTHER	Mitochondrion
SIVAB_SCSa_NODE_10265_length_912_cov_3.382166_g9227_i0_-_ORF_1__frame_1__translation	mTP	Mitochondrion
SIVAB_SCSb_NODE_1179_length_2655_cov_14.745649_g988_i0_-_ORF_1__frame_1__translation	OTHER	Mitochondrion
SIVAB_SLC25_NODE_1681_length_2335_cov_0.720562_g1422_i0_-_ORF_2__frame_3__translation	OTHER	Mitochondrion
SIVAB_SLC25_NODE_12381_length_765_cov_0.710031_g11226_i0_-_ORF_1__frame_2__translation	OTHER	Mitochondrion
SIVAB_YMC_NODE_8409_length_1069_cov_3.092357_g7510_i0_-_ORF_1__frame_2__translation	OTHER	Mitochondrion
SIVAB_YMC_NODE_9430_length_980_cov_7.071512_g8449_i0_-_ORF_1__frame_1__translation	OTHER	Mitochondrion
SIVAB_YMC_NODE_13930_length_681_cov_5.209386_g12713_i0_-_ORF_1__frame_2__translation	OTHER	Mitochondrion
SIVAB_ATM1_NODE_2559_length_1985_cov_1.922497_g2207_i0_-_ORF_2__frame_3__translation	OTHER	Lysosome/Vacuole
SIVAB_TPI_NODE_14958_length_631_cov_19.825397_g13709_i0_-_ORF_1__frame_2__translation	OTHER	Extracellular|Mitochondrion
SIVAB_SDR_like_NODE_7545_length_1154_cov_81.286271_g6708_i0_-_ORF_1__frame_3__translation	OTHER	Endoplasmic reticulum
SIVAB_PDH_E1b_NODE_4707_length_1506_cov_3.216099_g4136_i0_-_ORF_1__frame_1__translation	OTHER	Cytoplasm|Nucleus|Peroxisome
LEG_ATM1_partial_NODE_34012_length_251_cov_0.876404_g32892_i0_extraction_translation_frame_2_reverse	OTHER	Cytoplasm|Nucleus
LEG_DnaJ_Jac1-like_NODE_2868_length_1401_cov_15.899096_g2157_i0_-_ORF_1__frame_1__translation	OTHER	Cytoplasm|Nucleus
LEG_DnaJ_Jac1-like_NODE_3155_length_1324_cov_11.387690_g2426_i0_-_ORF_1__frame_1__translation	OTHER	Cytoplasm|Nucleus
LEG_ENO_cyto_NODE_3042_length_1351_cov_10.991393_g2315_i0_-_ORF_1__frame_2__translation	OTHER	Cytoplasm|Nucleus
LEG_GcvP_fused_NODE_995_length_3055_cov_7.581489_g566_i0_-_ORF_2__frame_2__translation	OTHER	Cytoplasm|Nucleus
LEG_mgen_ALT_NODE_706_length_18828_cov_30.452168_extraction_-_ORF_2__frame_1__translation	OTHER	Cytoplasm|Nucleus
LEG_mgen_ASCT_part_NODE_276_length_30293_cov_79.957701_extraction_-_ORF_2__frame_2__translation	OTHER	Cytoplasm|Nucleus
LEG_mgen_ASCT_part_NODE_1268_length_12016_cov_26.709816_extraction_-_ORF_2__frame_2__translation	OTHER	Cytoplasm|Nucleus
LEG_mgen_DnaJ_Jac1-like_NODE_380_length_26263_cov_124.426347_-_ORF_10__frame_1__translation	OTHER	Cytoplasm|Nucleus
LEG_mgen_DnaJ_Jac1-like_NODE_2221_length_6779_cov_30.249248_-_ORF_2__frame_1__translation	OTHER	Cytoplasm|Nucleus
LEG_mgen_GCSL_part_NODE_1327_length_11492_cov_107.834228_-_ORF_9__frame_2__translation	OTHER	Cytoplasm|Nucleus
LEG_mgen_GCST_NODE_1097_length_13586_cov_46.319860_-_ORF_7__frame_2__translation	OTHER	Cytoplasm|Nucleus
LEG_mgen_MMSDH_part_NODE_410_length_25549_cov_96.807922_-_ORF_4__frame_3__translation	OTHER	Cytoplasm|Nucleus
LEG_mgen_NODE_595_length_20813_cov_33.364788_-_ORF_14__frame_2__translation	OTHER	Cytoplasm|Nucleus
LEG_mgen_PDH_E1b_NODE_45_length_51609_cov_23.329125_-_ORF_32__frame_3__translation	OTHER	Cytoplasm|Nucleus
LEG_mgen_PDH_E1b_NODE_1450_length_10640_cov_25.243032_-_ORF_7__frame_3__translation	OTHER	Cytoplasm|Nucleus
LEG_mgen_PDH_E3_part_NODE_1327_length_11492_cov_107.834228_-_ORF_9__frame_2__translation	OTHER	Cytoplasm|Nucleus
LEG_PDH_E1b_NODE_13400_length_508_cov_2.894253_g12291_i0_-_ORF_1__frame_2__translation	OTHER	Cytoplasm|Nucleus
SIVAB_AAT_NODE_912_length_2900_cov_2.866571_g570_i1_-_ORF_1__frame_2__translation	OTHER	Cytoplasm|Nucleus
SIVAB_CBS_NODE_4805_length_1492_cov_8.613919_g4227_i0_-_ORF_1__frame_2__translation	OTHER	Cytoplasm|Nucleus
SIVAB_DnaJ_Jac1-like_NODE_6504_length_1269_cov_22.779335_g5756_i0_-_ORF_1__frame_1__translation	OTHER	Cytoplasm|Nucleus
SIVAB_DnaJ_Jac1-like_NODE_7422_length_1166_cov_14.942252_g6591_i0_-_ORF_1__frame_2__translation	OTHER	Cytoplasm|Nucleus
SIVAB_PDH_E1b_NODE_7286_length_1181_cov_4.038899_g4136_i1_-_ORF_1__frame_3__translation	OTHER	Cytoplasm|Nucleus
SIVAB_PDH_E1b_NODE_9216_length_999_cov_3.802752_g8251_i0_-_ORF_1__frame_1__translation	OTHER	Cytoplasm|Nucleus
SIVAB_PhoE-like_NODE_11663_length_812_cov_0.713869_g10547_i0_-_ORF_1__frame_3__translation	OTHER	Cytoplasm|Nucleus
SIVAB_TPI_NODE_12038_length_786_cov_47.743551_g10906_i0_-_ORF_1__frame_2__translation	OTHER	Cytoplasm|Nucleus
LEG_mgen_GDH_part_NODE_479_length_23493_cov_80.817898_-_ORF_9__frame_1__translation	SP	Cytoplasm|Mitochondrion
LEG_PRDH_NODE_5966_length_916_cov_5.440095_g5085_i0_-_ORF_1__frame_1__translation	OTHER	Cytoplasm|Mitochondrion
SIVAB_ACAT_NODE_525_length_3439_cov_6.882246_g417_i0_-_ORF_2__frame_3__translation	OTHER	Cytoplasm|Mitochondrion
SIVAB_MPPb_NODE_5295_length_1423_cov_1.989969_g4660_i0_-_ORF_1__frame_3__translation	OTHER	Cytoplasm|Mitochondrion
LEG_TPI_NODE_6502_length_870_cov_8.818068_g5600_i0_-_ORF_1__frame_2__translation	OTHER	Cytoplasm|Extracellular
LEG_TPI_NODE_7243_length_807_cov_5.935967_g6313_i0_-_ORF_1__frame_3__translation	OTHER	Cytoplasm|Extracellular
LEG_ALDH_NODE_5194_length_1000_cov_5.677454_g4350_i0_-_ORF_1__frame_3__translation	OTHER	Cytoplasm
LEG_ALT_NODE_2511_length_1511_cov_12.482615_g1835_i0_-_ORF_2__frame_2__translation	OTHER	Cytoplasm
LEG_CBS_NODE_2288_length_1595_cov_8.680026_g1649_i0_-_ORF_1__frame_1__translation	OTHER	Cytoplasm
LEG_DnaK_NODE_1545_length_2083_cov_40.971144_g1002_i0_-_ORF_1__frame_1__translation	OTHER	Cytoplasm
LEG_ECH_NODE_4311_length_1115_cov_2.821497_g3518_i0_-_ORF_2__frame_3__translation	OTHER	Cytoplasm
LEG_GCSL_NODE_2905_length_1387_cov_3.812024_g2192_i0_-_ORF_1__frame_3__translation	OTHER	Cytoplasm
LEG_GcvP_fused_NODE_2333_length_6403_cov_20.343372_-_ORF_3__frame_3__translation	OTHER	Cytoplasm
LEG_GSCL_NODE_5631_length_952_cov_4.526735_g4766_i0_-_ORF_1__frame_2__translation	OTHER	Cytoplasm
LEG_Hsp90_NODE_1428_length_2217_cov_19.714552_g905_i0_-_ORF_1__frame_3__translation	OTHER	Cytoplasm
LEG_IBD_NODE_11774_length_567_cov_1_900810_g10672_i0_translation_frame_3_reverse	OTHER	Cytoplasm
LEG_ME_NODE_1398_length_2251_cov_18.075758_g882_i0_-_ORF_1__frame_1__translation	OTHER	Cytoplasm
LEG_mgen_CBS_NODE_2354_length_6328_cov_30.804225_-_ORF_5__frame_3__translation	OTHER	Cytoplasm
LEG_mgen_DnaK_NODE_507_length_22865_cov_90.453206_-_ORF_9__frame_1__translation	OTHER	Cytoplasm
LEG_mgen_DnaK_NODE_3123_length_4534_cov_2.849104_-_ORF_1__frame_1__translation	OTHER	Cytoplasm
LEG_mgen_ECH_NODE_1044_length_14145_cov_17.285276_-_ORF_4__frame_2__translation	OTHER	Cytoplasm
LEG_mgen_ENO_cyto_NODE_322_length_28388_cov_48.358338_-_ORF_2__frame_1__translation	OTHER	Cytoplasm
LEG_mgen_ENO_cyto_NODE_919_length_15487_cov_46.752214_-_ORF_1__frame_1__translation	OTHER	Cytoplasm
LEG_mgen_FUM_NODE_4906_length_2645_cov_37.088959_-_ORF_1__frame_1__translation	OTHER	Cytoplasm
LEG_mgen_GCSL_part_NODE_861_length_16265_cov_15.432643_-_ORF_1__frame_1__translation	OTHER	Cytoplasm
LEG_mgen_GCSL_part_NODE_861_length_16265_cov_15.432643_-_ORF_2__frame_1__translation	OTHER	Cytoplasm
LEG_mgen_GCSL_part_NODE_1327_length_11492_cov_107.834228_-_ORF_10__frame_2__translation	OTHER	Cytoplasm
LEG_mgen_GcvP_NODE_1656_length_9317_cov_43.516322_-_ORF_1__frame_3__translation	OTHER	Cytoplasm
LEG_mgen_GcvP_NODE_2333_length_6403_cov_20.343372_-_ORF_2__frame_2__translation	OTHER	Cytoplasm
LEG_mgen_GcvP_NODE_5912_length_2148_cov_43.868382_-_ORF_1__frame_2__translation	OTHER	Cytoplasm
LEG_mgen_HSP60_part_NODE_112_length_39695_cov_53.418116_-_ORF_30__frame_3__translation	OTHER	Cytoplasm
LEG_mgen_HSP60_part_NODE_286_length_29807_cov_20.664724_-_ORF_22__frame_3__translation	OTHER	Cytoplasm
LEG_mgen_HSP60_part_NODE_1174_length_12742_cov_78.553151_-_ORF_2__frame_1__translation	OTHER	Cytoplasm
LEG_mgen_Hsp90_NODE_455_length_24104_cov_45.354298_-_ORF_19__frame_3__translation	OTHER	Cytoplasm
LEG_mgen_Hsp90_NODE_1028_length_14343_cov_20.335186_-_ORF_3__frame_3__translation	OTHER	Cytoplasm
LEG_mgen_Hsp90_NODE_2073_length_7221_cov_4.986186_-_ORF_4__frame_1__translation	OTHER	Cytoplasm
LEG_mgen_IscS_2_NODE_108_length_39859_cov_13.047569_-_ORF_22__frame_2__translation	OTHER	Cytoplasm
LEG_mgen_MDH_NODE_185_length_34566_cov_106.436162_-_ORF_15__frame_3__translation	OTHER	Cytoplasm
LEG_mgen_MDH_NODE_525_length_22411_cov_28.219036_-_ORF_6__frame_2__translation	OTHER	Cytoplasm
LEG_mgen_ME_NODE_1297_length_11783_cov_21.987989_-_ORF_5__frame_3__translation	OTHER	Cytoplasm
LEG_mgen_MMSDH_part_NODE_410_length_25549_cov_96.807922_-_ORF_1__frame_1__translation	OTHER	Cytoplasm
LEG_mgen_MPPa_NODE_1480_length_10413_cov_23.718452_-_ORF_3__frame_1__translation	OTHER	Cytoplasm
LEG_mgen_OGDH_E2_NODE_1519_length_10147_cov_24.030040_-_ORF_3__frame_1__-_ORF_3__frame_1__translation	OTHER	Cytoplasm
LEG_mgen_PDH_E1a_NODE_43_length_51874_cov_79.164261_-_ORF_20__frame_2__translation	OTHER	Cytoplasm
LEG_mgen_PDH_E2_NODE_1519_length_10147_cov_24.030040_-_ORF_3__frame_1__translation	OTHER	Cytoplasm
LEG_mgen_PDH_E3_part_NODE_1327_length_11492_cov_107.834228_-_ORF_10__frame_2__translation	OTHER	Cytoplasm
LEG_mgen_PGM_NODE_515_length_22731_cov_61.098611_-_ORF_9__frame_3__translation	OTHER	Cytoplasm
LEG_mgen_PGM_NODE_1128_length_13263_cov_30.527406_-_ORF_5__frame_1__translation	OTHER	Cytoplasm
LEG_mgen_PRX_NODE_30_length_57405_cov_65.237456_-_ORF_3__frame_1__translation	OTHER	Cytoplasm
LEG_mgen_SOD_NODE_418_length_25279_cov_52.522384_-_ORF_14__frame_1__translation	OTHER	Cytoplasm
LEG_MPPb_NODE_7629_length_782_cov_2.427362_g6688_i0_-_ORF_1__frame_2__translation	OTHER	Cytoplasm
LEG_PDH_E1a_NODE_4576_length_1080_cov_2.045680_g3769_i0_-_ORF_1__frame_3__translation	OTHER	Cytoplasm
LEG_PDH_E3_NODE_2905_length_1387_cov_3.812024_g2192_i0_-_ORF_1__frame_3__translation	OTHER	Cytoplasm
LEG_PGM_NODE_7126_length_816_cov_2.247645_g6200_i0_-_ORF_1__frame_1__translation	OTHER	Cytoplasm
LEG_PGM_NODE_7361_length_799_cov_3.917355_g6428_i0_-_ORF_1__frame_2__translation	OTHER	Cytoplasm
LEG_PGM_NODE_10915_length_601_cov_6.712121_g9818_i0_-_ORF_1__frame_3__translation	OTHER	Cytoplasm
LEG_PhoE-like_NODE_7080_length_819_cov_4.816354_g6156_i0_-_ORF_1__frame_2__translation	OTHER	Cytoplasm
LEG_PRX_NODE_7183_length_811_cov_11.707317_g6254_i0_-_ORF_1__frame_3__translation	OTHER	Cytoplasm
LEG_SCSb_NODE_4329_length_1113_cov_3.748077_g3534_i0_-_ORF_1__frame_2__translation	OTHER	Cytoplasm
LEG_SOD_NODE_8127_length_745_cov_3.154762_g7167_i0_-_ORF_1__frame_3__translation	OTHER	Cytoplasm
LEG_SOD_NODE_10140_length_636_cov_3.648313_g9054_i0_-_ORF_1__frame_2__translation	OTHER	Cytoplasm
LEG_TPI_NODE_6160_length_900_cov_8.157195_g5269_i0_-_ORF_1__frame_1__translation	OTHER	Cytoplasm
SIVAB_ACO_NODE_5633_length_1376_cov_0.669335_g4978_i0_extraction_-_ORF_2__frame_2__translation	SP	Cytoplasm
SIVAB_ACTE_NODE_21141_length_428_cov_0.694352_g19741_i0_translation	OTHER	Cytoplasm
SIVAB_AK_NODE_19673_length_464_cov_10.540059_g18303_i0_-_ORF_1__frame_1__translation	OTHER	Cytoplasm
SIVAB_ALT_NODE_1540_length_2402_cov_10.294945_g1305_i0_-_ORF_1__frame_3__translation	OTHER	Cytoplasm
SIVAB_ASCT_NODE_6139_length_1312_cov_10.230380_g5432_i0_-_ORF_1__frame_1__translation	OTHER	Cytoplasm
SIVAB_DnaK_NODE_2329_length_2060_cov_432.737713_g2007_i0_-_ORF_2__frame_3__translation	OTHER	Cytoplasm
SIVAB_DnaK_NODE_2336_length_2059_cov_432.861284_g2007_i1_-_ORF_2__frame_2__translation	OTHER	Cytoplasm
SIVAB_DnaK_NODE_2341_length_2058_cov_433.045054_g2007_i2_-_ORF_1__frame_1__translation	OTHER	Cytoplasm
SIVAB_DnaK_NODE_2414_length_2033_cov_438.768625_g2007_i3_-_ORF_1__frame_3__translation	OTHER	Cytoplasm
SIVAB_DnaK_NODE_5286_length_1424_cov_226.259830_g2007_i4_-_ORF_1__frame_3__translation	OTHER	Cytoplasm
SIVAB_E1_NODE_2830_length_1902_cov_1.291268_g2444_i0_-_ORF_2__frame_3__translation	OTHER	Cytoplasm
SIVAB_ECH_NODE_7452_length_1162_cov_2.289855_g6619_i0_-_ORF_1__frame_3__translation	OTHER	Cytoplasm
SIVAB_ENO_NODE_577_length_3346_cov_40.236409_g465_i0_-_ORF_1__frame_2__translation	OTHER	Cytoplasm
SIVAB_ENO_NODE_1091_length_2727_cov_18.426154_g911_i0_-_ORF_1__frame_1__translation	OTHER	Cytoplasm
SIVAB_ENO_NODE_5222_length_1431_cov_4.210890_g4597_i0_-_ORF_2__frame_2__translation	OTHER	Cytoplasm
SIVAB_FUM_NODE_1942_length_2209_cov_9.361671_g1659_i0_-_ORF_1__frame_3__translation	OTHER	Cytoplasm
SIVAB_GCSL_part_NODE_2488_length_2009_cov_21.958023_g2081_i1_-_ORF_1__frame_3__translation	OTHER	Cytoplasm
SIVAB_GCSL_part_NODE_4745_length_1500_cov_0.693372_g4170_i0_-_ORF_2__frame_3__translation	OTHER	Cytoplasm
SIVAB_GrpE_NODE_13841_length_686_cov_6.119857_g12628_i0_-_ORF_1__frame_2__translation	OTHER	Cytoplasm
SIVAB_HSP60_NODE_3692_length_1691_cov_14.577366_g3208_i0_-_ORF_1__frame_1__translation	OTHER	Cytoplasm
SIVAB_HSP60_NODE_4260_length_1584_cov_19.741935_g3723_i0_-_ORF_1__frame_1__translation	OTHER	Cytoplasm
SIVAB_HSP60_NODE_4261_length_1584_cov_17.749485_g3723_i1_translation	OTHER	Cytoplasm
SIVAB_HSP60_NODE_18719_length_491_cov_11.288462_g17371_i0_-_ORF_1__frame_2__translation	OTHER	Cytoplasm
SIVAB_Hsp90_NODE_1787_length_2278_cov_84.721990_g1517_i0_-_ORF_1__frame_3__translation	OTHER	Cytoplasm
SIVAB_IscS_2_NODE_5386_length_1410_cov_0.915822_g4749_i0_-_ORF_2__frame_2__translation	OTHER	Cytoplasm
SIVAB_IscU_NODE_707_length_3146_cov_2.038092_g582_i0_-_ORF_3__frame_2__translation	OTHER	Cytoplasm
SIVAB_ME_NODE_1335_length_2525_cov_89.812344_g1130_i0_-_ORF_1__frame_3__translation	OTHER	Cytoplasm
SIVAB_ME_NODE_1471_length_2444_cov_92.939577_g1130_i1_-_ORF_1__frame_3__translation	OTHER	Cytoplasm
SIVAB_ME_NODE_1563_length_2390_cov_95.159081_g1130_i2_-_ORF_1__frame_3__translation	OTHER	Cytoplasm
SIVAB_P5CDH_NODE_5525_length_1390_cov_10.316706_g4883_i0_-_ORF_1__frame_1__translation	OTHER	Cytoplasm
SIVAB_P5CDH_NODE_7959_length_1114_cov_27.061803_g7087_i0_-_ORF_1__frame_1__translation	OTHER	Cytoplasm
SIVAB_PDH_E3_NODE_2418_length_2032_cov_21.685039_g2081_i0_-_ORF_1__frame_3__translation	OTHER	Cytoplasm
SIVAB_PDH_E3_NODE_2488_length_2009_cov_21.958023_g2081_i1_-_ORF_1__frame_3__translation	OTHER	Cytoplasm
SIVAB_PGM_NODE_10822_length_872_cov_10.813423_g9750_i0_-_ORF_1__frame_3__translation	OTHER	Cytoplasm
SIVAB_PRX_NODE_1021_length_2790_cov_4.997747_g847_i0_-_ORF_1__frame_3__translation	OTHER	Cytoplasm
SIVAB_PRX_NODE_17727_length_523_cov_23.664141_g16398_i0_-_ORF_1__frame_1__translation	OTHER	Cytoplasm
SIVAB_SOD_NODE_12976_length_732_cov_1.242975_g11800_i0_-_ORF_1__frame_3__translation	OTHER	Cytoplasm
SIVAB_SOD_NODE_15769_length_597_cov_6.721277_g14495_i0_-_ORF_1__frame_2__translation	OTHER	Cytoplasm
LEG_mgen_unknown_protein_NODE_2661_length_5442_cov_49.087865_-_ORF_2__frame_1__translation	OTHER	Cell membrane
SIVAB_unknown_protein_NODE_3302_length_1777_cov_1.863636_g2868_i0_-_ORF_1__frame_1__translation	OTHER	Cell membrane
LEG_mgen_TIM17_NODE_148_length_36712_cov_57.623179_-_ORF_7__frame_2__translation	OTHER	Mitochondrion
LEG_mgen_TIM50_NODE_2548_length_5695_cov_35.354885_-_ORF_2__frame_1__translation	OTHER	Cytoplasm
LEG_TIM17_part_NODE_22767_length_324_cov_1.633466_g21647_i0_extraction_translation_frame_1_reverse	OTHER	Mitochondrion
LEG_TIM50_NODE_6640_length_858_cov_2.542675_g5733_i0_-_ORF_1__frame_2__translation	OTHER	Endoplasmic reticulum
SIVAB_TIM17_NODE_17180_length_542_cov_0.674699_g15861_i0_-_ORF_1__frame_2__translation	OTHER	Mitochondrion
SIVAB_TIM50_NODE_2514_length_2002_cov_2.318400_g2166_i0_-_ORF_1__frame_2__translation	OTHER	Mitochondrion

## Sheet: DeepLoc 2.1
Protein_ID	Localizations	Signals	Membrane types	Cytoplasm	Nucleus	Extracellular	Cell membrane	Mitochondrion	Plastid	Endoplasmic reticulum	Lysosome/Vacuole	Golgi apparatus	Peroxisome	Peripheral	Transmembrane	Lipid anchor	Soluble
LEG_2OGMC_NODE_4889_length_1036_cov_4.713396_g4064_i0_-_ORF_1__frame_1__translation	Mitochondrion	Transmembrane domain|Mitochondrial transit peptide	Transmembrane	0.24449999630451202	0.09399999678134918	0.022600000724196434	0.18619999289512634	0.8755000233650208	0.039400000125169754	0.22540000081062317	0.12860000133514404	0.2703000009059906	0.053199999034404755	0.1185000017285347	0.9090999960899353	0.020500000566244125	0.21150000393390656
LEG_2OGMC_NODE_5262_length_992_cov_12.812840_g4417_i0_-_ORF_1__frame_3__translation	Mitochondrion		Transmembrane	0.24539999663829803	0.10530000180006027	0.022099999710917473	0.12240000069141388	0.8514999747276306	0.03669999912381172	0.22769999504089355	0.09019999951124191	0.1808999925851822	0.02669999934732914	0.16349999606609344	0.8537999987602234	0.031099999323487282	0.22419999539852142
LEG_2OGMC_NODE_5815_length_932_cov_17.351572_g4941_i0_-_ORF_1__frame_1__translation	Mitochondrion		Transmembrane	0.250900000333786	0.08910000324249268	0.027300000190734863	0.11959999799728394	0.8707000017166138	0.037700001150369644	0.2295999974012375	0.09179999679327011	0.19020000100135803	0.03229999914765358	0.1581999957561493	0.8522999882698059	0.0284000001847744	0.22460000216960907
LEG_AAC_NODE_4433_length_1098_cov_45.525854_g3633_i0_-_ORF_1__frame_2__translation	Mitochondrion	Transmembrane domain|Mitochondrial transit peptide	Transmembrane	0.26489999890327454	0.07519999891519547	0.03480000048875809	0.22609999775886536	0.845300018787384	0.033799998462200165	0.24490000307559967	0.09269999712705612	0.18240000307559967	0.030700000002980232	0.14309999346733093	0.8539000153541565	0.05790000036358833	0.2854999899864197
LEG_AAC_NODE_6009_length_913_cov_2.578571_g5127_i0_-_ORF_1__frame_1__translation	Mitochondrion		Transmembrane	0.35440000891685486	0.06340000033378601	0.025100000202655792	0.21490000188350677	0.776199996471405	0.025699999183416367	0.2962999939918518	0.14219999313354492	0.2321999967098236	0.04399999976158142	0.15530000627040863	0.8644000291824341	0.03739999979734421	0.24660000205039978
LEG_AAC_NODE_6732_length_848_cov_11.069677_g5822_i0_-_ORF_1__frame_2__translation	Mitochondrion		Transmembrane	0.3513999879360199	0.19280000030994415	0.024700000882148743	0.15870000422000885	0.6614999771118164	0.04500000178813934	0.20309999585151672	0.04230000078678131	0.12269999831914902	0.005799999926239252	0.12600000202655792	0.9151999950408936	0.045499999076128006	0.2799000144004822
LEG_AAC_NODE_7228_length_808_cov_3.068027_g6299_i0_-_ORF_1__frame_3__translation	Mitochondrion		Transmembrane	0.33809998631477356	0.1234000027179718	0.030899999663233757	0.20100000500679016	0.6881999969482422	0.030500000342726707	0.21070000529289246	0.08219999819993973	0.1761000007390976	0.012900000438094139	0.16060000658035278	0.911899983882904	0.04439999908208847	0.16850000619888306
LEG_AADH_NODE_2409_length_1546_cov_13.942974_g1752_i0_-_ORF_1__frame_2__translation	Mitochondrion	Mitochondrial transit peptide	Soluble	0.22609999775886536	0.1137000024318695	0.03480000048875809	0.05939999967813492	0.8776000142097473	0.00570000009611249	0.06930000334978104	0.07249999791383743	0.07339999824762344	0.012400000356137753	0.4544999897480011	0.1168999969959259	0.09669999778270721	0.718500018119812
LEG_AADH_NODE_2489_length_1520_cov_13.541120_g1817_i0_-_ORF_1__frame_2__translation	Mitochondrion	Mitochondrial transit peptide	Soluble	0.27649998664855957	0.12770000100135803	0.060100000351667404	0.07129999995231628	0.83160001039505	0.007899999618530273	0.11649999767541885	0.0892999991774559	0.1274999976158142	0.01810000091791153	0.4431999921798706	0.12610000371932983	0.09769999980926514	0.729200005531311
LEG_AAT_NODE_2375_length_1561_cov_19.768817_g1723_i0_-_ORF_1__frame_1__translation	Mitochondrion	Mitochondrial transit peptide	Soluble	0.27950000762939453	0.16449999809265137	0.04639999940991402	0.060100000351667404	0.8585000038146973	0.011699999682605267	0.03889999911189079	0.036400001496076584	0.03500000014901161	0.010900000110268593	0.3418000042438507	0.1444000005722046	0.08619999885559082	0.7771000266075134
LEG_ACAT_NODE_3053_length_1349_cov_29.074451_g2325_i0_-_ORF_1__frame_1__translation	Mitochondrion	Mitochondrial transit peptide	Soluble	0.24130000174045563	0.11140000075101852	0.055799998342990875	0.057100001722574234	0.8932999968528748	0.002300000051036477	0.043299999088048935	0.03280000016093254	0.031700000166893005	0.03500000014901161	0.3901999890804291	0.17880000174045563	0.09040000289678574	0.7491999864578247
LEG_ACAT_NODE_3276_length_1299_cov_20.355628_g2541_i0_-_ORF_1__frame_3__translation	Mitochondrion	Mitochondrial transit peptide	Soluble	0.19280000030994415	0.09809999912977219	0.03920000046491623	0.06610000133514404	0.944599986076355	0.00279999990016222	0.0203000009059906	0.0333000011742115	0.015699999406933784	0.04280000180006027	0.384799987077713	0.1761000007390976	0.08209999650716782	0.741599977016449
LEG_ACC_NODE_4307_length_1115_cov_3.511516_g3514_i0_-_ORF_1__frame_2__translation	Mitochondrion	Transmembrane domain|Mitochondrial transit peptide	Transmembrane	0.18070000410079956	0.07410000264644623	0.053199999034404755	0.2727999985218048	0.8116999864578247	0.07970000058412552	0.20630000531673431	0.07159999758005142	0.17299999296665192	0.04820000007748604	0.08730000257492065	0.921999990940094	0.04270000010728836	0.24500000476837158
LEG_ACTE_NODE_12614_length_534_cov_16.075922_g11507_i0_-_ORF_1__frame_1__translation	Mitochondrion	Mitochondrial transit peptide	Soluble	0.41609999537467957	0.16459999978542328	0.023900000378489494	0.04989999905228615	0.6523000001907349	0.00419999985024333	0.05990000069141388	0.18539999425411224	0.07419999688863754	0.11540000140666962	0.41440001130104065	0.1509999930858612	0.11029999703168869	0.6930000185966492
LEG_AK_NODE_7992_length_754_cov_19.512482_g7033_i0_-_ORF_1__frame_2__translation	Mitochondrion	Mitochondrial transit peptide	Soluble	0.4300000071525574	0.2913999855518341	0.09700000286102295	0.044199999421834946	0.7958999872207642	0.13950000703334808	0.042899999767541885	0.021700000390410423	0.012299999594688416	0.061799999326467514	0.39239999651908875	0.08340000361204147	0.060100000351667404	0.8251000046730042
LEG_ALDH_NODE_5194_length_1000_cov_5.677454_g4350_i0_-_ORF_1__frame_3__translation	Cytoplasm	Nuclear localization signal|Nuclear export signal	Soluble	0.838699996471405	0.27320000529289246	0.13760000467300415	0.243599995970726	0.4860999882221222	0.1639000028371811	0.07519999891519547	0.03970000147819519	0.07900000363588333	0.04280000180006027	0.39879998564720154	0.18940000236034393	0.09229999780654907	0.7416999936103821
LEG_ALT_NODE_2511_length_1511_cov_12.482615_g1835_i0_-_ORF_2__frame_2__translation	Cytoplasm	Nuclear localization signal|Nuclear export signal	Soluble	0.7656000256538391	0.39399999380111694	0.04500000178813934	0.15060000121593475	0.22499999403953552	0.030500000342726707	0.13349999487400055	0.131400004029274	0.2393999993801117	0.003599999938160181	0.3131999969482422	0.15469999611377716	0.06109999865293503	0.8432999849319458
LEG_ASCT_NODE_2346_length_1569_cov_54.854278_g1695_i0_-_ORF_1__frame_2__translation	Mitochondrion	Mitochondrial transit peptide	Soluble	0.25099998712539673	0.09759999811649323	0.03009999915957451	0.04320000112056732	0.8669000267982483	0.003800000064074993	0.04830000177025795	0.09130000323057175	0.04430000111460686	0.05290000140666962	0.4961000084877014	0.06369999796152115	0.044599998742341995	0.8233000040054321
LEG_ASCT_NODE_2408_length_1546_cov_31.947047_g1751_i0_-_ORF_1__frame_2__translation	Mitochondrion	Mitochondrial transit peptide	Soluble	0.20080000162124634	0.10970000177621841	0.024000000208616257	0.0502999983727932	0.9100000262260437	0.0044999998062849045	0.04089999943971634	0.05829999968409538	0.03370000049471855	0.04320000112056732	0.5548999905586243	0.06040000170469284	0.04430000111460686	0.8180000185966492
LEG_AST_NODE_1652_length_9363_cov_23.758553_-_ORF_5__frame_1__translation	Mitochondrion	Mitochondrial transit peptide	Soluble	0.18870000541210175	0.056299999356269836	0.0738999992609024	0.11330000311136246	0.9602000117301941	0.005499999970197678	0.031300000846385956	0.060600001364946365	0.04490000009536743	0.010900000110268593	0.41839998960494995	0.0729999989271164	0.09000000357627869	0.8197000026702881
LEG_ATM1_partial_NODE_34012_length_251_cov_0.876404_g32892_i0_extraction_translation_frame_2_reverse	Cytoplasm|Nucleus	Nuclear localization signal	Soluble	0.6262999773025513	0.7578999996185303	0.19869999587535858	0.04050000011920929	0.29089999198913574	0.0031999999191612005	0.2240000069141388	0.11990000307559967	0.05130000039935112	0.011500000022351742	0.383899986743927	0.26460000872612	0.030799999833106995	0.682200014591217
LEG_CBS_NODE_2288_length_1595_cov_8.680026_g1649_i0_-_ORF_1__frame_1__translation	Cytoplasm	Nuclear localization signal	Soluble	0.7524999976158142	0.3847000002861023	0.0203000009059906	0.15610000491142273	0.21879999339580536	0.01759999990463257	0.17749999463558197	0.13729999959468842	0.0877000018954277	0.002899999963119626	0.4302000105381012	0.04780000075697899	0.13120000064373016	0.8460999727249146
LEG_DnaJ_Jac1-like_NODE_2868_length_1401_cov_15.899096_g2157_i0_-_ORF_1__frame_1__translation	Cytoplasm|Nucleus	Nuclear localization signal|Nuclear export signal	Soluble	0.7662000060081482	0.6184999942779541	0.04360000044107437	0.07779999822378159	0.12489999830722809	0.02280000038444996	0.4602999985218048	0.037700001150369644	0.1428000032901764	0.005400000140070915	0.3750999867916107	0.024399999529123306	0.4593000113964081	0.7746000289916992
LEG_DnaJ_Jac1-like_NODE_3155_length_1324_cov_11.387690_g2426_i0_-_ORF_1__frame_1__translation	Cytoplasm|Nucleus	Nuclear localization signal	Soluble	0.7548999786376953	0.7026000022888184	0.16910000145435333	0.046799998730421066	0.19949999451637268	0.022199999541044235	0.31360000371932983	0.04580000042915344	0.11240000277757645	0.0027000000700354576	0.34450000524520874	0.01759999990463257	0.2921000123023987	0.8457000255584717
LEG_DnaJ_NODE_6246_length_892_cov_3.452991_g5350_i0_-_ORF_1__frame_2__translation	Mitochondrion	Mitochondrial transit peptide	Transmembrane	0.13019999861717224	0.13539999723434448	0.01140000019222498	0.045099999755620956	0.8719000220298767	0.011300000362098217	0.25870001316070557	0.0272000003606081	0.044599998742341995	0.03480000048875809	0.1891999989748001	0.9247000217437744	0.040699999779462814	0.20520000159740448
LEG_DnaK_NODE_1545_length_2083_cov_40.971144_g1002_i0_-_ORF_1__frame_1__translation	Cytoplasm	Nuclear localization signal	Soluble	0.8123999834060669	0.35510000586509705	0.15299999713897705	0.15449999272823334	0.16820000112056732	0.021400000900030136	0.18400000035762787	0.3012000024318695	0.17350000143051147	0.01209999993443489	0.4733000099658966	0.030500000342726707	0.3560999929904938	0.8030999898910522
LEG_ECH_NODE_4311_length_1115_cov_2.821497_g3518_i0_-_ORF_2__frame_3__translation	Cytoplasm		Soluble	0.7371000051498413	0.2013999968767166	0.029600000008940697	0.18129999935626984	0.5202000141143799	0.1014999970793724	0.24250000715255737	0.08969999849796295	0.033399999141693115	0.050999999046325684	0.5214999914169312	0.2964000105857849	0.05660000070929527	0.6665999889373779
LEG_ENO_cyto_NODE_3042_length_1351_cov_10.991393_g2315_i0_-_ORF_1__frame_2__translation	Cytoplasm|Nucleus	Nuclear localization signal|Nuclear export signal	Soluble	0.8540999889373779	0.5293999910354614	0.12470000237226486	0.14139999449253082	0.2906999886035919	0.06300000101327896	0.20090000331401825	0.10080000013113022	0.22339999675750732	0.03590000048279762	0.5945000052452087	0.05490000173449516	0.16859999299049377	0.6735000014305115
LEG_ENO_NODE_2519_length_1508_cov_13.321254_g1843_i0_-_ORF_1__frame_2__translation	Mitochondrion	Mitochondrial transit peptide	Soluble	0.26840001344680786	0.08760000020265579	0.0414000004529953	0.08079999685287476	0.9639999866485596	0.04960000142455101	0.08619999885559082	0.12020000070333481	0.05829999968409538	0.05249999836087227	0.5964000225067139	0.08240000158548355	0.10100000351667404	0.6905999779701233
LEG_ENO_NODE_2595_length_1480_cov_15.297797_g1904_i0_-_ORF_1__frame_2__translation	Mitochondrion	Mitochondrial transit peptide	Soluble	0.3513000011444092	0.14190000295639038	0.09880000352859497	0.10649999976158142	0.8909000158309937	0.03519999980926514	0.17069999873638153	0.14259999990463257	0.14429999887943268	0.0284000001847744	0.5981000065803528	0.08299999684095383	0.10570000112056732	0.6948000192642212
LEG_FUM_NODE_2454_length_1533_cov_6.770548_g1787_i0_-_ORF_1__frame_3__translation	Mitochondrion	Mitochondrial transit peptide	Soluble	0.3366999924182892	0.15150000154972076	0.05490000173449516	0.08619999885559082	0.7839999794960022	0.08910000324249268	0.09950000047683716	0.1387999951839447	0.09539999812841415	0.09229999780654907	0.48899999260902405	0.09960000216960907	0.15620000660419464	0.7001000046730042
LEG_GCSH_NODE_18455_length_384_cov_9_633441_g17335_i0_translation_frame_2_reverse	Mitochondrion	Mitochondrial transit peptide	Peripheral|Soluble	0.12359999865293503	0.07569999992847443	0.08110000193119049	0.10830000042915344	0.890500009059906	0.0017999999690800905	0.028300000354647636	0.10700000077486038	0.05939999967813492	0.00419999985024333	0.6800000071525574	0.16599999368190765	0.04360000044107437	0.7197999954223633
LEG_GCSL_NODE_2905_length_1387_cov_3.812024_g2192_i0_-_ORF_1__frame_3__translation	Cytoplasm	Nuclear localization signal	Soluble	0.7641000151634216	0.219200000166893	0.19329999387264252	0.34860000014305115	0.2087000012397766	0.2459000051021576	0.07180000096559525	0.17270000278949738	0.16349999606609344	0.05570000037550926	0.4196999967098236	0.20250000059604645	0.11959999799728394	0.6477000117301941
LEG_GCST_NODE_3560_length_1244_cov_7.789069_g2813_i0_-_ORF_1__frame_1__translation	Mitochondrion	Mitochondrial transit peptide	Soluble	0.20469999313354492	0.12939999997615814	0.030400000512599945	0.038600001484155655	0.9496999979019165	0.004600000102072954	0.029100000858306885	0.07119999825954437	0.030799999833106995	0.012299999594688416	0.5317000150680542	0.1307000070810318	0.031700000166893005	0.6970000267028809
LEG_GcvP_fused_NODE_995_length_3055_cov_7.581489_g566_i0_-_ORF_2__frame_2__translation	Cytoplasm|Nucleus	Nuclear localization signal|Nuclear export signal	Soluble	0.7493000030517578	0.5338000059127808	0.04960000142455101	0.24799999594688416	0.15320000052452087	0.10119999945163727	0.16830000281333923	0.025800000876188278	0.16290000081062317	0.07980000227689743	0.4918999969959259	0.1265999972820282	0.10289999842643738	0.6930999755859375
LEG_GcvP_fused_NODE_2333_length_6403_cov_20.343372_-_ORF_3__frame_3__translation	Cytoplasm	Nuclear localization signal|Nuclear export signal	Peripheral|Soluble	0.8582000136375427	0.4009999930858612	0.040800001472234726	0.14069999754428864	0.30169999599456787	0.1525000035762787	0.1462000012397766	0.0925000011920929	0.14010000228881836	0.04820000007748604	0.6402999758720398	0.28839999437332153	0.041099999099969864	0.6110000014305115
LEG_GcvP_NODE_995_length_3055_cov_7.581489_g566_i0_-_ORF_1__frame_1__translation	Mitochondrion	Mitochondrial transit peptide	Soluble	0.3199999928474426	0.0892999991774559	0.0142000000923872	0.05090000107884407	0.9057999849319458	0.019500000402331352	0.044599998742341995	0.0575999990105629	0.07569999992847443	0.007600000128149986	0.579200029373169	0.1023000031709671	0.047600001096725464	0.804099977016449
LEG_GDH_NODE_2144_length_1663_cov_7.514465_g1519_i0_translation	Mitochondrion	Mitochondrial transit peptide	Soluble	0.27790001034736633	0.15029999613761902	0.10499999672174454	0.10970000177621841	0.7763000130653381	0.014299999922513962	0.19449999928474426	0.1607999950647354	0.1071000024676323	0.04390000179409981	0.43970000743865967	0.3091999888420105	0.37459999322891235	0.42899999022483826
LEG_GDH_NODE_2427_length_1542_cov_5.198094_g1766_i0_-_ORF_1__frame_1__translation	Mitochondrion	Mitochondrial transit peptide	Soluble	0.26980000734329224	0.1420000046491623	0.022600000724196434	0.048700001090765	0.9031999707221985	0.031700000166893005	0.05909999832510948	0.0957999974489212	0.10840000212192535	0.026900000870227814	0.47510001063346863	0.09220000356435776	0.11159999668598175	0.7317000031471252
LEG_GrpE_NODE_5589_length_956_cov_5.771234_g4728_i0_-_ORF_1__frame_2__translation	Mitochondrion	Mitochondrial transit peptide	Peripheral|Soluble	0.2930999994277954	0.17589999735355377	0.02449999935925007	0.023900000378489494	0.9448000192642212	0.016599999740719795	0.02979999966919422	0.022700000554323196	0.12559999525547028	0.02590000070631504	0.6151000261306763	0.1615999937057495	0.08420000225305557	0.6686000227928162
LEG_GSCL_NODE_5631_length_952_cov_4.526735_g4766_i0_-_ORF_1__frame_2__translation	Cytoplasm		Soluble	0.7778000235557556	0.3343000113964081	0.10140000283718109	0.15189999341964722	0.18539999425411224	0.07999999821186066	0.3133000135421753	0.20270000398159027	0.19539999961853027	0.1128000020980835	0.51910001039505	0.14329999685287476	0.11550000309944153	0.6086999773979187
LEG_HIBADH_NODE_5234_length_995_cov_105.456616_g4390_i0_-_ORF_1__frame_1__translation	Mitochondrion	Mitochondrial transit peptide	Soluble	0.30090001225471497	0.15880000591278076	0.02630000002682209	0.052299998700618744	0.7143999934196472	0.010900000110268593	0.05730000138282776	0.14710000157356262	0.0364999994635582	0.004600000102072954	0.503000020980835	0.1728000044822693	0.05490000173449516	0.680899977684021
LEG_HIBADH_NODE_5721_length_941_cov_7.737327_g4851_i0_-_ORF_1__frame_3__translation	Mitochondrion	Mitochondrial transit peptide	Soluble	0.3010999858379364	0.17309999465942383	0.0272000003606081	0.03629999980330467	0.7828999757766724	0.0020000000949949026	0.04270000010728836	0.06310000270605087	0.02449999935925007	0.014100000262260437	0.5090000033378601	0.24160000681877136	0.0860000029206276	0.6442999839782715
LEG_Hsp10_NODE_17382_length_405_cov_3.415663_g16264_i0_-_BLAST_Hit_translation	Mitochondrion		Peripheral|Soluble	0.17829999327659607	0.07720000296831131	0.007000000216066837	0.02630000002682209	0.7795000076293945	0.02810000069439411	0.04019999876618385	0.017400000244379044	0.007499999832361937	0.13179999589920044	0.6442000269889832	0.031599998474121094	0.047600001096725464	0.7099999785423279
LEG_HSP60_NODE_1866_length_1812_cov_14.726279_g1275_i0_-_ORF_1__frame_3__translation	Mitochondrion	Mitochondrial transit peptide	Soluble	0.22519999742507935	0.09749999642372131	0.020600000396370888	0.030899999663233757	0.9014999866485596	0.005400000140070915	0.10249999910593033	0.03920000046491623	0.07039999961853027	0.013500000350177288	0.5447999835014343	0.07119999825954437	0.22339999675750732	0.7159000039100647
LEG_HSP60_NODE_1910_length_1786_cov_8.406305_g1311_i0_-_ORF_1__frame_1__translation	Mitochondrion	Mitochondrial transit peptide	Soluble	0.23489999771118164	0.12839999794960022	0.018200000748038292	0.0348999984562397	0.90420001745224	0.004399999976158142	0.1080000028014183	0.05469999834895134	0.06800000369548798	0.007199999876320362	0.4875999987125397	0.09700000286102295	0.1973000019788742	0.7167999744415283
LEG_HSP60_NODE_1923_length_1780_cov_24.185120_g1324_i0_-_ORF_1__frame_1__translation	Mitochondrion	Mitochondrial transit peptide	Soluble	0.2152000069618225	0.10050000250339508	0.027799999341368675	0.04320000112056732	0.9269999861717224	0.0035000001080334187	0.09290000051259995	0.057999998331069946	0.07959999889135361	0.008299999870359898	0.5205000042915344	0.06679999828338623	0.17659999430179596	0.7337999939918518
LEG_Hsp90_NODE_1428_length_2217_cov_19.714552_g905_i0_-_ORF_1__frame_3__translation	Cytoplasm	Nuclear localization signal	Soluble	0.7454000115394592	0.47040000557899475	0.08760000020265579	0.10840000212192535	0.1526000052690506	0.037700001150369644	0.20819999277591705	0.2045000046491623	0.17870000004768372	0.018799999728798866	0.4307999908924103	0.026499999687075615	0.21439999341964722	0.8639000058174133
LEG_IBD_NODE_11774_length_567_cov_1_900810_g10672_i0_translation_frame_3_reverse	Cytoplasm	Peroxisomal targeting signal	Transmembrane	0.3476000130176544	0.3490000069141388	0.034699998795986176	0.17010000348091125	0.4440999925136566	0.1216999962925911	0.08659999817609787	0.015300000086426735	0.019099999219179153	0.36559998989105225	0.2815000116825104	0.5135999917984009	0.34119999408721924	0.3917999863624573
LEG_IscU_NODE_13193_length_515_cov_2.194570_g12086_i0_-_ORF_1__frame_3__translation	Mitochondrion	Mitochondrial transit peptide	Peripheral|Soluble	0.1696999967098236	0.08070000261068344	0.030500000342726707	0.07169999927282333	0.972000002861023	0.00419999985024333	0.04309999942779541	0.02969999983906746	0.030400000512599945	0.007899999618530273	0.7124000191688538	0.04089999943971634	0.08470000326633453	0.7092000246047974
LEG_MDH_NODE_4799_length_1050_cov_20.103378_g3983_i0_-_ORF_1__frame_1__translation	Mitochondrion	Mitochondrial transit peptide	Soluble	0.3172999918460846	0.10010000318288803	0.02889999933540821	0.06790000200271606	0.9505000114440918	0.008500000461935997	0.03420000150799751	0.058800000697374344	0.01810000091791153	0.0052999998442828655	0.5264000296592712	0.09880000352859497	0.07050000131130219	0.7649000287055969
LEG_ME_NODE_1398_length_2251_cov_18.075758_g882_i0_-_ORF_1__frame_1__translation	Cytoplasm		Soluble	0.8199999928474426	0.21699999272823334	0.052799999713897705	0.13459999859333038	0.2712000012397766	0.07400000095367432	0.11879999935626984	0.2207999974489212	0.21359999477863312	0.043800000101327896	0.5080999732017517	0.14589999616146088	0.10019999742507935	0.7735000252723694
LEG_mgen_2OGMC_NODE_82_length_43555_cov_76.820646_-_ORF_11__frame_1__translation	Mitochondrion		Transmembrane	0.25130000710487366	0.09179999679327011	0.027499999850988388	0.11990000307559967	0.8723000288009644	0.03840000182390213	0.23019999265670776	0.08730000257492065	0.18539999425411224	0.026799999177455902	0.16419999301433563	0.8511000275611877	0.03139999881386757	0.21770000457763672
LEG_mgen_2OGMC_NODE_132_length_37501_cov_21.001953_-_ORF_13__frame_2__translation	Mitochondrion	Transmembrane domain|Mitochondrial transit peptide	Transmembrane	0.24449999630451202	0.09399999678134918	0.022600000724196434	0.18619999289512634	0.8755000233650208	0.039400000125169754	0.22540000081062317	0.12860000133514404	0.2703000009059906	0.053199999034404755	0.1185000017285347	0.9090999960899353	0.020500000566244125	0.21150000393390656
LEG_mgen_2OGMC_NODE_5580_length_2296_cov_30.212079_-_ORF_1__frame_1__translation	Mitochondrion		Transmembrane	0.250900000333786	0.08910000324249268	0.027300000190734863	0.11959999799728394	0.8707000017166138	0.037700001150369644	0.2295999974012375	0.09179999679327011	0.19020000100135803	0.03229999914765358	0.1581999957561493	0.8522999882698059	0.0284000001847744	0.22460000216960907
LEG_mgen_AAC_NODE_391_length_26035_cov_42.379419_-_ORF_19__frame_3__translation	Mitochondrion	Transmembrane domain	Transmembrane	0.2953000068664551	0.0860000029206276	0.04439999908208847	0.23749999701976776	0.8138999938964844	0.029400000348687172	0.26750001311302185	0.12070000171661377	0.16050000488758087	0.037700001150369644	0.13979999721050262	0.8228999972343445	0.05299999937415123	0.299699991941452
LEG_mgen_AAC_NODE_1641_length_9412_cov_35.674744_-_ORF_1__frame_1__translation	Mitochondrion	Transmembrane domain|Mitochondrial transit peptide	Transmembrane	0.26489999890327454	0.07519999891519547	0.03480000048875809	0.22609999775886536	0.845300018787384	0.033799998462200165	0.24490000307559967	0.09269999712705612	0.18240000307559967	0.030700000002980232	0.14309999346733093	0.8539000153541565	0.05790000036358833	0.2854999899864197
LEG_mgen_AAC_NODE_4136_length_3270_cov_6.534203_-_ORF_1__frame_1__translation	Mitochondrion		Transmembrane	0.272599995136261	0.10369999706745148	0.09880000352859497	0.2199999988079071	0.6305000185966492	0.017100000753998756	0.2703999876976013	0.12240000069141388	0.14869999885559082	0.01590000092983246	0.1340000033378601	0.8992999792098999	0.04100000113248825	0.23639999330043793
LEG_mgen_AAC_NODE_5072_length_2548_cov_30.002478_-_ORF_1__frame_1__translation	Mitochondrion		Transmembrane	0.243599995970726	0.10440000146627426	0.12430000305175781	0.21979999542236328	0.6873000264167786	0.037300001829862595	0.2531000077724457	0.09709999710321426	0.14949999749660492	0.041600000113248825	0.08429999649524689	0.9128999710083008	0.04839999973773956	0.26910001039505005
LEG_mgen_AAC_NODE_11147_length_1013_cov_16.349887_-_ORF_1__frame_1__translation	Mitochondrion		Transmembrane	0.29319998621940613	0.11649999767541885	0.0284000001847744	0.15880000591278076	0.5870000123977661	0.029899999499320984	0.18359999358654022	0.044599998742341995	0.1615999937057495	0.004800000227987766	0.15880000591278076	0.9235000014305115	0.039400000125169754	0.2678000032901764
LEG_mgen_AADH_NODE_274_length_30393_cov_26.575861_-_ORF_19__frame_2__translation	Mitochondrion	Mitochondrial transit peptide	Soluble	0.2160000056028366	0.08380000293254852	0.022199999541044235	0.057100001722574234	0.932200014591217	0.00570000009611249	0.05939999967813492	0.033799998462200165	0.05260000005364418	0.009499999694526196	0.4431000053882599	0.21629999577999115	0.0786999985575676	0.7300000190734863
LEG_mgen_AADH_NODE_1097_length_13586_cov_46.319860_-_ORF_6__frame_2__translation	Mitochondrion	Mitochondrial transit peptide	Soluble	0.19359999895095825	0.09120000153779984	0.037700001150369644	0.059300001710653305	0.9207000136375427	0.004699999932199717	0.07419999688863754	0.051600001752376556	0.0746999979019165	0.011300000362098217	0.4553999900817871	0.22200000286102295	0.07919999957084656	0.723800003528595
LEG_mgen_AADH_NODE_1728_length_8887_cov_37.692237_-_ORF_3__frame_1__translation	Mitochondrion	Mitochondrial transit peptide	Soluble	0.23019999265670776	0.09040000289678574	0.05829999968409538	0.06669999659061432	0.9350000023841858	0.004900000058114529	0.07670000195503235	0.058400001376867294	0.09719999879598618	0.021400000900030136	0.43880000710487366	0.22179999947547913	0.08269999921321869	0.7224000096321106
LEG_mgen_AAT_NODE_1415_length_10876_cov_21.302726_-_ORF_5__frame_2__translation	Mitochondrion	Mitochondrial transit peptide	Soluble	0.27950000762939453	0.16449999809265137	0.04639999940991402	0.060100000351667404	0.8585000038146973	0.011699999682605267	0.03889999911189079	0.036400001496076584	0.03500000014901161	0.010900000110268593	0.3418000042438507	0.1444000005722046	0.08619999885559082	0.7771000266075134
LEG_mgen_AAT_NODE_4017_length_3368_cov_15.482567_-_ORF_2__frame_2__translation	Mitochondrion	Mitochondrial transit peptide	Soluble	0.28049999475479126	0.13259999454021454	0.0215000007301569	0.051899999380111694	0.9021000266075134	0.013500000350177288	0.022600000724196434	0.03680000081658363	0.01769999973475933	0.004900000058114529	0.4205000102519989	0.13429999351501465	0.07590000331401825	0.786899983882904
LEG_mgen_ACAT_NODE_362_length_26914_cov_65.016986_-_ORF_17__frame_3__translation	Mitochondrion	Mitochondrial transit peptide	Soluble	0.2214999943971634	0.10429999977350235	0.03200000151991844	0.05380000174045563	0.9415000081062317	0.0020000000949949026	0.023800000548362732	0.03759999945759773	0.019200000911951065	0.05350000038743019	0.398499995470047	0.17100000381469727	0.08229999989271164	0.7437999844551086
LEG_mgen_ACAT_NODE_3195_length_4410_cov_37.295821_-_ORF_1__frame_3__translation	Mitochondrion	Mitochondrial transit peptide	Soluble	0.1881999969482422	0.09790000319480896	0.040300000458955765	0.06650000065565109	0.9452999830245972	0.00279999990016222	0.019899999722838402	0.034699998795986176	0.016200000420212746	0.04280000180006027	0.3828999996185303	0.17640000581741333	0.08110000193119049	0.743399977684021
LEG_mgen_ACO_NODE_178_length_35019_cov_33.063711_-_ORF_16__frame_3__-_ORF_16__frame_3__translation	Mitochondrion	Mitochondrial transit peptide	Soluble	0.35179999470710754	0.1193000003695488	0.012600000016391277	0.05689999833703041	0.9315000176429749	0.06069999933242798	0.08789999783039093	0.08129999786615372	0.12800000607967377	0.020400000736117363	0.57669997215271	0.13169999420642853	0.0681999996304512	0.7430999875068665
LEG_mgen_ACTE_NODE_236_length_31873_cov_75.083570_-_ORF_13__frame_3__translation	Mitochondrion		Soluble	0.4194999933242798	0.16009999811649323	0.008299999870359898	0.057100001722574234	0.7468000054359436	0.007699999958276749	0.06040000170469284	0.08900000154972076	0.032999999821186066	0.19020000100135803	0.38280001282691956	0.11180000007152557	0.07000000029802322	0.7376000285148621
LEG_mgen_AK_NODE_77_length_45294_cov_32.430624_-_ORF_11__frame_3__translation	Mitochondrion	Mitochondrial transit peptide	Soluble	0.4300000071525574	0.2913999855518341	0.09700000286102295	0.044199999421834946	0.7958999872207642	0.13950000703334808	0.042899999767541885	0.021700000390410423	0.012299999594688416	0.061799999326467514	0.39239999651908875	0.08340000361204147	0.060100000351667404	0.8251000046730042
LEG_mgen_ALDH_NODE_1285_length_11878_cov_31.064760_-_ORF_1__frame_1__translation	Mitochondrion	Mitochondrial transit peptide	Soluble	0.2084999978542328	0.13050000369548798	0.03920000046491623	0.05380000174045563	0.9139000177383423	0.008100000210106373	0.0406000018119812	0.06939999759197235	0.021700000390410423	0.024299999698996544	0.38609999418258667	0.11739999800920486	0.18459999561309814	0.7511000037193298
LEG_mgen_ALT_NODE_706_length_18828_cov_30.452168_extraction_-_ORF_1__frame_1__translation	Mitochondrion	Mitochondrial transit peptide	Soluble	0.17030000686645508	0.04520000144839287	0.08449999988079071	0.09449999779462814	0.9531999826431274	0.0024999999441206455	0.03460000082850456	0.07119999825954437	0.10509999841451645	0.012500000186264515	0.4099000096321106	0.1485999971628189	0.059300001710653305	0.8399999737739563
LEG_mgen_ALT_NODE_706_length_18828_cov_30.452168_extraction_-_ORF_2__frame_1__translation	Cytoplasm|Nucleus	Nuclear localization signal|Nuclear export signal	Soluble	0.7523999810218811	0.5170999765396118	0.02449999935925007	0.10480000078678131	0.20260000228881836	0.01489999983459711	0.15070000290870667	0.12870000302791595	0.26829999685287476	0.006800000090152025	0.2937999963760376	0.1574999988079071	0.07999999821186066	0.8059999942779541
LEG_mgen_ASCT_part_NODE_276_length_30293_cov_79.957701_extraction_-_ORF_1__frame_1__translation	Mitochondrion	Mitochondrial transit peptide	Soluble	0.210999995470047	0.05889999866485596	0.05249999836087227	0.06030000001192093	0.9334999918937683	0.0071000000461936	0.07680000364780426	0.04839999973773956	0.08250000327825546	0.11230000108480453	0.5271999835968018	0.09239999949932098	0.10989999771118164	0.7235000133514404
LEG_mgen_ASCT_part_NODE_276_length_30293_cov_79.957701_extraction_-_ORF_2__frame_2__translation	Cytoplasm|Nucleus		Soluble	0.8382999897003174	0.5105000138282776	0.022099999710917473	0.05169999971985817	0.22380000352859497	0.025499999523162842	0.32109999656677246	0.10100000351667404	0.11230000108480453	0.07919999957084656	0.4643999934196472	0.03519999980926514	0.05209999904036522	0.8479999899864197
LEG_mgen_ASCT_part_NODE_1268_length_12016_cov_26.709816_extraction_-_ORF_1__frame_1__translation	Mitochondrion	Mitochondrial transit peptide	Soluble	0.1565999984741211	0.05290000140666962	0.051899999380111694	0.043800000101327896	0.9448000192642212	0.006500000134110451	0.036400001496076584	0.05820000171661377	0.07159999758005142	0.09390000253915787	0.5270000100135803	0.05469999834895134	0.12710000574588776	0.7802000045776367
LEG_mgen_ASCT_part_NODE_1268_length_12016_cov_26.709816_extraction_-_ORF_2__frame_2__translation	Cytoplasm|Nucleus		Soluble	0.8381999731063843	0.6000999808311462	0.021299999207258224	0.042500000447034836	0.24529999494552612	0.032999999821186066	0.33889999985694885	0.10999999940395355	0.0737999975681305	0.09009999781847	0.46810001134872437	0.03579999879002571	0.04659999907016754	0.8519999980926514
LEG_mgen_AST_NODE_1652_length_9363_cov_23.758553_-_ORF_5__frame_1__translation	Mitochondrion	Mitochondrial transit peptide	Soluble	0.18870000541210175	0.056299999356269836	0.0738999992609024	0.11330000311136246	0.9602000117301941	0.005499999970197678	0.031300000846385956	0.060600001364946365	0.04490000009536743	0.010900000110268593	0.41839998960494995	0.0729999989271164	0.09000000357627869	0.8197000026702881
LEG_mgen_ATM1_NODE_1346_length_11345_cov_19.851132_-_ORF_4__frame_2__translation	Mitochondrion		Transmembrane	0.11760000139474869	0.2354000061750412	0.019700000062584877	0.12860000133514404	0.810699999332428	0.07119999825954437	0.40869998931884766	0.49939998984336853	0.09160000085830688	0.24639999866485596	0.42480000853538513	0.9344000220298767	0.03319999948143959	0.1437000036239624
LEG_mgen_ATM1_NODE_1346_length_11345_cov_19.851132_-_ORF_5__frame_3__translation	Mitochondrion	Mitochondrial transit peptide	Transmembrane	0.13179999589920044	0.05909999832510948	0.04800000041723251	0.10329999774694443	0.9032999873161316	0.024000000208616257	0.14900000393390656	0.0640999972820282	0.08259999752044678	0.10779999941587448	0.4101000130176544	0.9750999808311462	0.10090000182390213	0.08540000021457672
LEG_mgen_CBS_NODE_2354_length_6328_cov_30.804225_-_ORF_5__frame_3__translation	Cytoplasm	Nuclear localization signal|Nuclear export signal	Soluble	0.8468999862670898	0.4871000051498413	0.021900000050663948	0.10740000009536743	0.1931000053882599	0.06319999694824219	0.22100000083446503	0.15119999647140503	0.13760000467300415	0.007000000216066837	0.5001999735832214	0.0786999985575676	0.07989999651908875	0.7430999875068665
LEG_mgen_DnaJ_Jac1-like_NODE_380_length_26263_cov_124.426347_-_ORF_10__frame_1__translation	Cytoplasm|Nucleus	Nuclear localization signal	Soluble	0.6435999870300293	0.711899995803833	0.13330000638961792	0.032600000500679016	0.16689999401569366	0.01850000023841858	0.3093999922275543	0.04809999838471413	0.050700001418590546	0.009800000116229057	0.39430001378059387	0.048700001090765	0.1835000067949295	0.7680000066757202
LEG_mgen_DnaJ_Jac1-like_NODE_2221_length_6779_cov_30.249248_-_ORF_2__frame_1__translation	Cytoplasm|Nucleus	Nuclear localization signal	Soluble	0.682699978351593	0.7064999938011169	0.1687999963760376	0.0689999982714653	0.18690000474452972	0.00570000009611249	0.3643999993801117	0.04839999973773956	0.07739999890327454	0.017400000244379044	0.37700000405311584	0.03290000185370445	0.18790000677108765	0.8090000152587891
LEG_mgen_DnaJ_NODE_1992_length_7566_cov_32.690415_-_ORF_1__frame_2__translation	Mitochondrion	Mitochondrial transit peptide	Transmembrane	0.13950000703334808	0.1362999975681305	0.011599999852478504	0.047600001096725464	0.8917999863624573	0.013199999928474426	0.2500999867916107	0.028699999675154686	0.042500000447034836	0.046300001442432404	0.19869999587535858	0.9344000220298767	0.04960000142455101	0.17980000376701355
LEG_mgen_DnaK_NODE_507_length_22865_cov_90.453206_-_ORF_9__frame_1__translation	Cytoplasm		Soluble	0.8252999782562256	0.2734000086784363	0.1527000069618225	0.14010000228881836	0.2222999930381775	0.02329999953508377	0.16590000689029694	0.2759000062942505	0.2070000022649765	0.02280000038444996	0.45969998836517334	0.022299999371170998	0.3481999933719635	0.8600000143051147
LEG_mgen_DnaK_NODE_3123_length_4534_cov_2.849104_-_ORF_1__frame_1__translation	Cytoplasm	Nuclear localization signal	Soluble	0.7414000034332275	0.4221999943256378	0.13259999454021454	0.10930000245571136	0.2567000091075897	0.035999998450279236	0.1738000065088272	0.1777999997138977	0.10580000281333923	0.01489999983459711	0.4846999943256378	0.03189999982714653	0.3522000014781952	0.8015999794006348
LEG_mgen_ECH_NODE_1044_length_14145_cov_17.285276_-_ORF_4__frame_2__translation	Cytoplasm	Peroxisomal targeting signal	Soluble	0.7821000218391418	0.44290000200271606	0.016100000590085983	0.04450000077486038	0.16349999606609344	0.007699999958276749	0.3668000102043152	0.22939999401569366	0.06800000369548798	0.17649999260902405	0.44190001487731934	0.22589999437332153	0.04769999906420708	0.7182000279426575
LEG_mgen_ENO_cyto_NODE_322_length_28388_cov_48.358338_-_ORF_2__frame_1__translation	Cytoplasm	Nuclear localization signal|Nuclear export signal	Soluble	0.867900013923645	0.4323999881744385	0.1274999976158142	0.1324000060558319	0.30250000953674316	0.04100000113248825	0.11349999904632568	0.12950000166893005	0.1673000007867813	0.03200000151991844	0.511900007724762	0.08320000022649765	0.11599999666213989	0.70169997215271
LEG_mgen_ENO_cyto_NODE_919_length_15487_cov_46.752214_-_ORF_1__frame_1__translation	Cytoplasm		Peripheral|Lipid anchor	0.6061999797821045	0.3147999942302704	0.10419999808073044	0.4052000045776367	0.3357999920845032	0.023499999195337296	0.11079999804496765	0.3280999958515167	0.1860000044107437	0.02250000089406967	0.6051999926567078	0.07590000331401825	0.8794999718666077	0.47589999437332153
LEG_mgen_ENO_NODE_65_length_47509_cov_73.692774_-_ORF_16__frame_1__translation	Mitochondrion	Mitochondrial transit peptide	Peripheral|Soluble	0.31150001287460327	0.0885000005364418	0.05169999971985817	0.09600000083446503	0.9516000151634216	0.03099999949336052	0.09229999780654907	0.1517000049352646	0.09130000323057175	0.03660000115633011	0.6000000238418579	0.0820000022649765	0.1014999970793724	0.6922000050544739
LEG_mgen_ENO_NODE_4411_length_3023_cov_6.426796_-_ORF_1__frame_1__translation	Mitochondrion	Mitochondrial transit peptide	Soluble	0.26840001344680786	0.08760000020265579	0.0414000004529953	0.08079999685287476	0.9639999866485596	0.04960000142455101	0.08619999885559082	0.12020000070333481	0.05829999968409538	0.05249999836087227	0.5964000225067139	0.08240000158548355	0.10100000351667404	0.6905999779701233
LEG_mgen_FD_NODE_171_length_35524_cov_58.425290_-_ORF_9__frame_2__translation	Mitochondrion	Mitochondrial transit peptide	Peripheral|Soluble	0.19779999554157257	0.06289999932050705	0.022199999541044235	0.06530000269412994	0.9670000076293945	0.002099999925121665	0.05249999836087227	0.031099999323487282	0.056699998676776886	0.03269999846816063	0.7558000087738037	0.06589999794960022	0.03139999881386757	0.6122999787330627
LEG_mgen_FUM_NODE_4906_length_2645_cov_37.088959_-_ORF_1__frame_1__translation	Cytoplasm	Nuclear localization signal	Soluble	0.6302000284194946	0.43950000405311584	0.12549999356269836	0.21379999816417694	0.32350000739097595	0.15680000185966492	0.19689999520778656	0.07010000199079514	0.08209999650716782	0.054999999701976776	0.32420000433921814	0.475600004196167	0.13500000536441803	0.6381999850273132
LEG_mgen_GCSH_NODE_1529_length_10084_cov_26.315356_-_ORF_1__frame_1__translation	Mitochondrion	Mitochondrial transit peptide	Soluble	0.14830000698566437	0.07769999653100967	0.11940000206232071	0.06700000166893005	0.9341999888420105	0.0013000000035390258	0.02329999953508377	0.10130000114440918	0.05590000003576279	0.008100000210106373	0.5013999938964844	0.0340999998152256	0.0544000007212162	0.8228999972343445
LEG_mgen_GCSL_part_NODE_861_length_16265_cov_15.432643_-_ORF_1__frame_1__translation	Cytoplasm	Nuclear export signal	Soluble	0.7799000144004822	0.48660001158714294	0.3133000135421753	0.11630000174045563	0.31279999017715454	0.06279999762773514	0.2425999939441681	0.19830000400543213	0.22509999573230743	0.3116999864578247	0.45730000734329224	0.29510000348091125	0.06319999694824219	0.6401000022888184
LEG_mgen_GCSL_part_NODE_861_length_16265_cov_15.432643_-_ORF_2__frame_1__translation	Cytoplasm	Peroxisomal targeting signal	Soluble	0.7958999872207642	0.34200000762939453	0.1234000027179718	0.1152999997138977	0.19259999692440033	0.10660000145435333	0.4163999855518341	0.1687999963760376	0.22280000150203705	0.23890000581741333	0.48919999599456787	0.10350000113248825	0.10819999873638153	0.6385999917984009
LEG_mgen_GCSL_part_NODE_1327_length_11492_cov_107.834228_-_ORF_9__frame_2__translation	Cytoplasm|Nucleus	Nuclear localization signal|Nuclear export signal	Soluble	0.817799985408783	0.5478000044822693	0.4341000020503998	0.11940000206232071	0.296999990940094	0.06400000303983688	0.11940000206232071	0.08980000019073486	0.1517000049352646	0.21449999511241913	0.4657999873161316	0.26089999079704285	0.0771000012755394	0.6538000106811523
LEG_mgen_GCSL_part_NODE_1327_length_11492_cov_107.834228_-_ORF_10__frame_2__translation	Cytoplasm		Soluble	0.7867000102996826	0.3359000086784363	0.15160000324249268	0.1290999948978424	0.2402999997138977	0.14820000529289246	0.38029998540878296	0.20419999957084656	0.20800000429153442	0.09690000116825104	0.4851999878883362	0.12300000339746475	0.125	0.586899995803833
LEG_mgen_GCST_NODE_1097_length_13586_cov_46.319860_-_ORF_7__frame_2__translation	Cytoplasm|Nucleus	Nuclear localization signal	Soluble	0.852400004863739	0.6331999897956848	0.039000000804662704	0.02590000070631504	0.2199999988079071	0.11749999970197678	0.23659999668598175	0.06750000268220901	0.062199998646974564	0.21639999747276306	0.507099986076355	0.22529999911785126	0.04529999941587448	0.727400004863739
LEG_mgen_GcvP_NODE_1656_length_9317_cov_43.516322_-_ORF_1__frame_3__translation	Cytoplasm	Nuclear localization signal|Nuclear export signal	Peripheral|Soluble	0.8361999988555908	0.4390000104904175	0.058400001376867294	0.18889999389648438	0.2833000123500824	0.21389999985694885	0.12600000202655792	0.0763000026345253	0.12060000002384186	0.03880000114440918	0.6008999943733215	0.25040000677108765	0.04129999876022339	0.6675000190734863
LEG_mgen_GcvP_NODE_2333_length_6403_cov_20.343372_-_ORF_2__frame_2__translation	Cytoplasm		Soluble	0.6802999973297119	0.2847000062465668	0.1981000006198883	0.09610000252723694	0.2759000062942505	0.3357999920845032	0.16449999809265137	0.11190000176429749	0.17440000176429749	0.08009999990463257	0.5799999833106995	0.1941000074148178	0.05380000174045563	0.7311000227928162
LEG_mgen_GcvP_NODE_5912_length_2148_cov_43.868382_-_ORF_1__frame_2__translation	Cytoplasm	Nuclear localization signal	Soluble	0.6721000075340271	0.35749998688697815	0.1509999930858612	0.11969999969005585	0.17730000615119934	0.23420000076293945	0.09910000115633011	0.08860000222921371	0.1696999967098236	0.008899999782443047	0.576200008392334	0.08089999854564667	0.05689999833703041	0.8299000263214111
LEG_mgen_GDH_part_NODE_479_length_23493_cov_80.817898_-_ORF_9__frame_1__translation	Cytoplasm|Mitochondrion		Soluble	0.801800012588501	0.4352000057697296	0.4203999936580658	0.094200000166893	0.8432999849319458	0.1460999995470047	0.25209999084472656	0.06459999829530716	0.13339999318122864	0.21719999611377716	0.3328000009059906	0.251800000667572	0.06920000165700912	0.7513999938964844
LEG_mgen_GrpE_NODE_3631_length_3825_cov_26.270957_-_ORF_1__frame_1__translation	Mitochondrion	Mitochondrial transit peptide	Peripheral|Soluble	0.31310001015663147	0.16009999811649323	0.023099999874830246	0.023900000378489494	0.9513999819755554	0.01679999940097332	0.023800000548362732	0.020800000056624413	0.09700000286102295	0.025499999523162842	0.6277999877929688	0.14550000429153442	0.09300000220537186	0.6818000078201294
LEG_mgen_Grx5_NODE_1171_length_12773_cov_25.783093_-_ORF_7__frame_2__translation	Mitochondrion	Mitochondrial transit peptide	Peripheral|Soluble	0.27320000529289246	0.05310000106692314	0.06620000302791595	0.07370000332593918	0.9168000221252441	0.04780000075697899	0.030899999663233757	0.0560000017285347	0.11079999804496765	0.07440000027418137	0.607699990272522	0.11999999731779099	0.13359999656677246	0.6366000175476074
LEG_mgen_HIBADH_NODE_1228_length_12335_cov_24.135403_-_ORF_4__frame_2__translation	Mitochondrion	Mitochondrial transit peptide	Soluble	0.2718999981880188	0.16060000658035278	0.013000000268220901	0.03240000084042549	0.8842999935150146	0.00800000037997961	0.021299999207258224	0.07699999958276749	0.01600000075995922	0.007799999788403511	0.5026999711990356	0.15970000624656677	0.04989999905228615	0.6840999722480774
LEG_mgen_HIBADH_NODE_1523_length_10122_cov_156.550775_-_ORF_6__frame_2__translation	Mitochondrion	Mitochondrial transit peptide	Soluble	0.31189998984336853	0.17059999704360962	0.023800000548362732	0.04179999977350235	0.8141999840736389	0.0038999998942017555	0.03620000183582306	0.05950000137090683	0.025499999523162842	0.016499999910593033	0.4772999882698059	0.1542000025510788	0.05869999900460243	0.6891999840736389
LEG_mgen_Hsp10_NODE_594_length_20920_cov_73.855865_-_BLAST_Hit_translation	Mitochondrion		Peripheral|Soluble	0.17829999327659607	0.07720000296831131	0.007000000216066837	0.02630000002682209	0.7795000076293945	0.02810000069439411	0.04019999876618385	0.017400000244379044	0.007499999832361937	0.13179999589920044	0.6442000269889832	0.031599998474121094	0.047600001096725464	0.7099999785423279
LEG_mgen_HSP60_part_NODE_112_length_39695_cov_53.418116_-_ORF_24__frame_2__translation	Mitochondrion	Mitochondrial transit peptide	Peripheral|Soluble	0.18080000579357147	0.1039000004529953	0.02280000038444996	0.03790000081062317	0.9150999784469604	0.0052999998442828655	0.09120000153779984	0.05689999833703041	0.10790000110864639	0.009999999776482582	0.618399977684021	0.08410000056028366	0.11259999871253967	0.7836999893188477
LEG_mgen_HSP60_part_NODE_112_length_39695_cov_53.418116_-_ORF_30__frame_3__translation	Cytoplasm	Nuclear localization signal	Soluble	0.6654999852180481	0.32170000672340393	0.1354999989271164	0.13429999351501465	0.20810000598430634	0.04910000041127205	0.38519999384880066	0.13349999487400055	0.23280000686645508	0.0015999999595806003	0.38260000944137573	0.09929999709129333	0.2904999852180481	0.6310999989509583
LEG_mgen_HSP60_part_NODE_286_length_29807_cov_20.664724_-_ORF_22__frame_3__translation	Cytoplasm	Nuclear localization signal|Nuclear export signal	Soluble	0.725600004196167	0.4372999966144562	0.045499999076128006	0.04879999905824661	0.2842000126838684	0.026599999517202377	0.07320000231266022	0.1776999980211258	0.120899997651577	0.00570000009611249	0.4429999887943268	0.0430000014603138	0.25609999895095825	0.679099977016449
LEG_mgen_HSP60_part_NODE_286_length_29807_cov_20.664724_extraction_-_ORF_2__frame_1__translation	Mitochondrion	Mitochondrial transit peptide	Peripheral|Soluble	0.1469999998807907	0.07850000262260437	0.024800000712275505	0.03970000147819519	0.9150999784469604	0.006000000052154064	0.10140000283718109	0.025100000202655792	0.07159999758005142	0.02539999969303608	0.6439999938011169	0.09549999982118607	0.09350000321865082	0.7653999924659729
LEG_mgen_HSP60_part_NODE_1174_length_12742_cov_78.553151_-_ORF_2__frame_1__translation	Cytoplasm	Nuclear localization signal|Nuclear export signal	Soluble	0.7113000154495239	0.44200000166893005	0.048900000751018524	0.056299999356269836	0.26179999113082886	0.0210999995470047	0.07540000230073929	0.15530000627040863	0.10909999907016754	0.00430000014603138	0.39160001277923584	0.050700001418590546	0.15109999477863312	0.6862000226974487
LEG_mgen_HSP60_part_NODE_1174_length_12742_cov_78.553151_-_ORF_5__frame_3__translation	Mitochondrion	Mitochondrial transit peptide	Peripheral|Soluble	0.13950000703334808	0.06700000166893005	0.03370000049471855	0.053300000727176666	0.9424999952316284	0.003700000001117587	0.08309999853372574	0.0357000008225441	0.09220000356435776	0.019200000911951065	0.64410001039505	0.0949999988079071	0.1177000030875206	0.7523999810218811
LEG_mgen_Hsp90_NODE_455_length_24104_cov_45.354298_-_ORF_19__frame_3__translation	Cytoplasm	Nuclear localization signal	Soluble	0.7889999747276306	0.38670000433921814	0.08659999817609787	0.10639999806880951	0.18780000507831573	0.03519999980926514	0.23330000042915344	0.18569999933242798	0.2085999995470047	0.023099999874830246	0.41530001163482666	0.02449999935925007	0.2061000019311905	0.8716999888420105
LEG_mgen_Hsp90_NODE_1028_length_14343_cov_20.335186_-_ORF_3__frame_3__translation	Cytoplasm	Nuclear localization signal|Nuclear export signal	Soluble	0.771399974822998	0.4390999972820282	0.07209999859333038	0.09049999713897705	0.18019999563694	0.04259999841451645	0.1881999969482422	0.17219999432563782	0.19470000267028809	0.030500000342726707	0.4147999882698059	0.023099999874830246	0.21410000324249268	0.8691999912261963
LEG_mgen_Hsp90_NODE_2073_length_7221_cov_4.986186_-_ORF_4__frame_1__translation	Cytoplasm	Nuclear localization signal	Soluble	0.7925000190734863	0.4239000082015991	0.0778999999165535	0.09839999675750732	0.1761000007390976	0.031099999323487282	0.2110999971628189	0.16269999742507935	0.18850000202655792	0.025499999523162842	0.4092000126838684	0.024000000208616257	0.2126999944448471	0.8702999949455261
LEG_mgen_IBD_NODE_69_length_47303_cov_60.392509_-_ORF_26__frame_3__translation	Mitochondrion	Mitochondrial transit peptide	Soluble	0.17350000143051147	0.09239999949932098	0.038100000470876694	0.10830000042915344	0.8952000141143799	0.002400000113993883	0.06120000034570694	0.037300001829862595	0.051899999380111694	0.23649999499320984	0.4194999933242798	0.27469998598098755	0.04690000042319298	0.663100004196167
LEG_mgen_IscS_2_NODE_108_length_39859_cov_13.047569_-_ORF_22__frame_2__translation	Cytoplasm	Nuclear localization signal|Nuclear export signal	Soluble	0.7340999841690063	0.4043000042438507	0.0608999989926815	0.1005999967455864	0.37299999594688416	0.19460000097751617	0.17419999837875366	0.23190000653266907	0.21400000154972076	0.015699999406933784	0.5073999762535095	0.06719999760389328	0.14980000257492065	0.6859999895095825
LEG_mgen_IscS_NODE_108_length_39859_cov_13.047569_-_ORF_21__frame_2__translation	Mitochondrion	Mitochondrial transit peptide	Soluble	0.25589999556541443	0.05559999868273735	0.03350000083446503	0.052000001072883606	0.9362000226974487	0.22920000553131104	0.05290000140666962	0.08799999952316284	0.06620000302791595	0.08980000019073486	0.5248000025749207	0.17180000245571136	0.07490000128746033	0.7275999784469604
LEG_mgen_IscU_NODE_161_length_35944_cov_36.994249_-_BLAST_Hit_translation	Mitochondrion	Mitochondrial transit peptide	Peripheral|Soluble	0.10379999876022339	0.05249999836087227	0.05869999900460243	0.06360000371932983	0.9850000143051147	0.004800000227987766	0.02410000003874302	0.020800000056624413	0.042500000447034836	0.0031999999191612005	0.7039999961853027	0.12160000205039978	0.09359999746084213	0.7307000160217285
LEG_mgen_MDH_NODE_185_length_34566_cov_106.436162_-_ORF_15__frame_3__translation	Cytoplasm	Nuclear export signal	Soluble	0.8177000284194946	0.47110000252723694	0.01730000041425228	0.121799997985363	0.37310001254081726	0.28760001063346863	0.302700012922287	0.13249999284744263	0.3109999895095825	0.06870000064373016	0.5095999836921692	0.1256999969482422	0.0674000009894371	0.7591000199317932
LEG_mgen_MDH_NODE_525_length_22411_cov_28.219036_-_ORF_6__frame_2__translation	Cytoplasm	Nuclear export signal	Soluble	0.8346999883651733	0.4323999881744385	0.04899999871850014	0.11760000139474869	0.35740000009536743	0.24719999730587006	0.23970000445842743	0.19110000133514404	0.32120001316070557	0.0674000009894371	0.4934000074863434	0.10899999737739563	0.062199998646974564	0.7627000212669373
LEG_mgen_ME_NODE_1297_length_11783_cov_21.987989_-_ORF_5__frame_3__translation	Cytoplasm		Soluble	0.8029999732971191	0.19629999995231628	0.05719999969005585	0.1574999988079071	0.25220000743865967	0.06719999760389328	0.10509999841451645	0.23800000548362732	0.22830000519752502	0.05999999865889549	0.5052000284194946	0.1573999971151352	0.09000000357627869	0.7644000053405762
LEG_mgen_MMC_NODE_195_length_33929_cov_32.090498_-_ORF_18__frame_1__translation	Mitochondrion	Mitochondrial transit peptide	Transmembrane	0.3531999886035919	0.13439999520778656	0.020600000396370888	0.07890000194311142	0.8641999959945679	0.04809999838471413	0.3361999988555908	0.14219999313354492	0.320499986410141	0.15049999952316284	0.13169999420642853	0.9162999987602234	0.05380000174045563	0.2085999995470047
LEG_mgen_MMC_NODE_473_length_23674_cov_52.060347_-_ORF_5__frame_2__translation	Mitochondrion		Transmembrane	0.2935999929904938	0.08060000091791153	0.033799998462200165	0.13570000231266022	0.7998999953269958	0.07880000025033951	0.25589999556541443	0.11410000175237656	0.22869999706745148	0.15919999778270721	0.12189999967813492	0.8375999927520752	0.026799999177455902	0.29319998621940613
LEG_mgen_MMC_NODE_2192_length_6848_cov_61.480881_-_ORF_1__frame_1__translation	Mitochondrion		Transmembrane	0.4142000079154968	0.1662999987602234	0.03060000017285347	0.1826999932527542	0.703499972820282	0.04690000042319298	0.30790001153945923	0.09130000323057175	0.13330000638961792	0.05460000038146973	0.1746000051498413	0.8863000273704529	0.03519999980926514	0.22619999945163727
LEG_mgen_MMC_NODE_2584_length_5622_cov_30.987625_-_ORF_3__frame_3__translation	Mitochondrion	Mitochondrial transit peptide	Transmembrane	0.37450000643730164	0.15850000083446503	0.05920000001788139	0.1673000007867813	0.6851000189781189	0.05000000074505806	0.39259999990463257	0.14190000295639038	0.16369999945163727	0.05310000106692314	0.19200000166893005	0.9301000237464905	0.03849999979138374	0.1753000020980835
LEG_mgen_MMSDH_NODE_410_length_25549_cov_96.807922_-_BLAST_Hit_translation	Mitochondrion	Mitochondrial transit peptide	Soluble	0.25940001010894775	0.11720000207424164	0.0608999989926815	0.04989999905228615	0.9147999882698059	0.009399999864399433	0.034699998795986176	0.05820000171661377	0.04910000041127205	0.00279999990016222	0.5180000066757202	0.23000000417232513	0.06599999964237213	0.6966000199317932
LEG_mgen_MMSDH_part_NODE_410_length_25549_cov_96.807922_-_ORF_1__frame_1__translation	Cytoplasm		Soluble	0.8737999796867371	0.35089999437332153	0.12780000269412994	0.06400000303983688	0.5958999991416931	0.02539999969303608	0.24969999492168427	0.08959999680519104	0.11810000240802765	0.07769999653100967	0.5472000241279602	0.3075000047683716	0.06639999896287918	0.6425999999046326
LEG_mgen_MMSDH_part_NODE_410_length_25549_cov_96.807922_-_ORF_4__frame_3__translation	Cytoplasm|Nucleus	Nuclear localization signal|Nuclear export signal	Soluble	0.7073000073432922	0.5934000015258789	0.04619999974966049	0.10239999741315842	0.16369999945163727	0.21490000188350677	0.2662999927997589	0.32440000772476196	0.12720000743865967	0.031300000846385956	0.487199991941452	0.025800000876188278	0.28200000524520874	0.7448999881744385
LEG_mgen_MPPa_NODE_1480_length_10413_cov_23.718452_-_ORF_3__frame_1__translation	Cytoplasm		Soluble	0.641700029373169	0.27399998903274536	0.02889999933540821	0.22380000352859497	0.27869999408721924	0.07819999754428864	0.164900004863739	0.16920000314712524	0.18549999594688416	0.010400000028312206	0.5006999969482422	0.18930000066757202	0.06340000033378601	0.7282000184059143
LEG_mgen_MPPb_NODE_2682_length_5403_cov_33.628127_-_ORF_2__frame_1__translation	Mitochondrion	Mitochondrial transit peptide	Peripheral|Soluble	0.16670000553131104	0.08500000089406967	0.011599999852478504	0.07199999690055847	0.9490000009536743	0.005799999926239252	0.10429999977350235	0.07460000365972519	0.12309999763965607	0.03310000151395798	0.6662999987602234	0.21250000596046448	0.06880000233650208	0.6822999715805054
LEG_mgen_NODE_595_length_20813_cov_33.364788_-_ORF_14__frame_2__translation	Cytoplasm|Nucleus	Nuclear localization signal|Nuclear export signal	Soluble	0.8307999968528748	0.5031999945640564	0.020600000396370888	0.1200999990105629	0.18070000410079956	0.04280000180006027	0.19689999520778656	0.14880000054836273	0.10909999907016754	0.005900000222027302	0.4848000109195709	0.07490000128746033	0.07450000196695328	0.7408999800682068
LEG_mgen_OGDH_E1_NODE_31_length_55051_cov_38.129725_-_ORF_7__frame_3__translation	Mitochondrion	Mitochondrial transit peptide	Soluble	0.23250000178813934	0.12359999865293503	0.012000000104308128	0.06340000033378601	0.9146999716758728	0.007899999618530273	0.045099999755620956	0.057999998331069946	0.024000000208616257	0.004399999976158142	0.46720001101493835	0.046300001442432404	0.03959999978542328	0.8615000247955322
LEG_mgen_OGDH_E2_NODE_1519_length_10147_cov_24.030040_-_ORF_3__frame_1__-_ORF_3__frame_1__translation	Cytoplasm	Nuclear localization signal	Soluble	0.7085000276565552	0.2554999887943268	0.2500999867916107	0.04619999974966049	0.2395000010728836	0.04270000010728836	0.18029999732971191	0.2425999939441681	0.17489999532699585	0.003800000064074993	0.4235999882221222	0.10490000247955322	0.07199999690055847	0.791700005531311
LEG_mgen_P5CDH_NODE_1525_length_10101_cov_46.353519_-_ORF_1__frame_1__translation	Mitochondrion	Mitochondrial transit peptide	Soluble	0.30640000104904175	0.08150000125169754	0.04910000041127205	0.07670000195503235	0.8686000108718872	0.021800000220537186	0.03420000150799751	0.10769999772310257	0.0885000005364418	0.019999999552965164	0.585099995136261	0.1590999960899353	0.13590000569820404	0.7443000078201294
LEG_mgen_PDH_E1a_NODE_43_length_51874_cov_79.164261_-_ORF_20__frame_2__translation	Cytoplasm		Soluble	0.7893000245094299	0.43160000443458557	0.00860000029206276	0.12600000202655792	0.3804999887943268	0.030500000342726707	0.1565999984741211	0.07519999891519547	0.042100001126527786	0.04320000112056732	0.3346000015735626	0.09780000150203705	0.0681999996304512	0.7207000255584717
LEG_mgen_PDH_E1b_NODE_45_length_51609_cov_23.329125_-_ORF_32__frame_3__translation	Cytoplasm|Nucleus	Nuclear localization signal|Nuclear export signal	Soluble	0.819599986076355	0.6090999841690063	0.19140000641345978	0.16940000653266907	0.2948000133037567	0.06480000168085098	0.0812000036239624	0.06030000001192093	0.19189999997615814	0.12049999833106995	0.30230000615119934	0.31150001287460327	0.05559999868273735	0.6629999876022339
LEG_mgen_PDH_E1b_NODE_1450_length_10640_cov_25.243032_-_ORF_7__frame_3__translation	Cytoplasm|Nucleus	Peroxisomal targeting signal	Soluble	0.9121000170707703	0.5074999928474426	0.13249999284744263	0.0828000009059906	0.6069999933242798	0.006899999920278788	0.17569999396800995	0.13040000200271606	0.05480000004172325	0.5564000010490417	0.3287999927997589	0.2371000051498413	0.05180000141263008	0.7250999808311462
LEG_mgen_PDH_E2_NODE_1519_length_10147_cov_24.030040_-_ORF_3__frame_1__translation	Cytoplasm	Nuclear localization signal	Soluble	0.7085000276565552	0.2554999887943268	0.2500999867916107	0.04619999974966049	0.2395000010728836	0.04270000010728836	0.18029999732971191	0.2425999939441681	0.17489999532699585	0.003800000064074993	0.4235999882221222	0.10490000247955322	0.07199999690055847	0.791700005531311
LEG_mgen_PDH_E3_part_NODE_1327_length_11492_cov_107.834228_-_ORF_9__frame_2__translation	Cytoplasm|Nucleus	Nuclear localization signal|Nuclear export signal	Soluble	0.817799985408783	0.5478000044822693	0.4341000020503998	0.11940000206232071	0.296999990940094	0.06400000303983688	0.11940000206232071	0.08980000019073486	0.1517000049352646	0.21449999511241913	0.4657999873161316	0.26089999079704285	0.0771000012755394	0.6538000106811523
LEG_mgen_PDH_E3_part_NODE_1327_length_11492_cov_107.834228_-_ORF_10__frame_2__translation	Cytoplasm		Soluble	0.7867000102996826	0.3359000086784363	0.15160000324249268	0.1290999948978424	0.2402999997138977	0.14820000529289246	0.38029998540878296	0.20419999957084656	0.20800000429153442	0.09690000116825104	0.4851999878883362	0.12300000339746475	0.125	0.586899995803833
LEG_mgen_PEPCK_NODE_237_length_31860_cov_85.227965_-_ORF_3__frame_3__translation	Mitochondrion	Mitochondrial transit peptide	Peripheral|Soluble	0.4431000053882599	0.17399999499320984	0.048900000751018524	0.07270000129938126	0.7401999831199646	0.030400000512599945	0.24789999425411224	0.1160999983549118	0.12970000505447388	0.04529999941587448	0.6650999784469604	0.1168999969959259	0.11320000141859055	0.6916000247001648
LEG_mgen_PEPCK_NODE_2609_length_5574_cov_48.547274_-_ORF_5__frame_2__translation	Mitochondrion	Mitochondrial transit peptide	Soluble	0.3603000044822693	0.15520000457763672	0.049400001764297485	0.060100000351667404	0.8738999962806702	0.0066999997943639755	0.06469999998807907	0.061799999326467514	0.06780000030994415	0.00839999970048666	0.5989999771118164	0.09149999916553497	0.09200000017881393	0.7638999819755554
LEG_mgen_PGM_NODE_515_length_22731_cov_61.098611_-_ORF_9__frame_3__translation	Cytoplasm	Nuclear localization signal|Nuclear export signal	Soluble	0.8489999771118164	0.43230000138282776	0.1281999945640564	0.08470000326633453	0.5478000044822693	0.07029999792575836	0.08089999854564667	0.04360000044107437	0.08980000019073486	0.017400000244379044	0.391400009393692	0.042899999767541885	0.11259999871253967	0.8033000230789185
LEG_mgen_PGM_NODE_1128_length_13263_cov_30.527406_-_ORF_5__frame_1__translation	Cytoplasm	Nuclear localization signal	Soluble	0.6944000124931335	0.16500000655651093	0.2045000046491623	0.5529000163078308	0.4456999897956848	0.048500001430511475	0.11789999902248383	0.28600001335144043	0.08540000021457672	0.014100000262260437	0.4426000118255615	0.07190000265836716	0.8138999938964844	0.5640000104904175
LEG_mgen_PGM_NODE_1211_length_12457_cov_37.998459_-_ORF_7__frame_3__translation	Mitochondrion	Mitochondrial transit peptide	Soluble	0.335099995136261	0.0940999984741211	0.12710000574588776	0.10260000079870224	0.8436999917030334	0.017500000074505806	0.12950000166893005	0.10679999738931656	0.10459999740123749	0.0272000003606081	0.4440000057220459	0.10869999974966049	0.13009999692440033	0.6488000154495239
LEG_mgen_PGM_NODE_1470_length_10501_cov_32.028533_-_ORF_4__frame_3__translation	Mitochondrion	Mitochondrial transit peptide	Soluble	0.22630000114440918	0.09130000323057175	0.0544000007212162	0.07450000196695328	0.8828999996185303	0.03700000047683716	0.0608999989926815	0.1054999977350235	0.041200000792741776	0.023600000888109207	0.4918000102043152	0.07649999856948853	0.11089999973773956	0.6765000224113464
LEG_mgen_PhoE-like_NODE_173_length_35505_cov_53.301148_-_ORF_19__frame_2__translation	Mitochondrion	Mitochondrial transit peptide|Peroxisomal targeting signal	Transmembrane	0.26010000705718994	0.1834000051021576	0.2046000063419342	0.13619999587535858	0.7470999956130981	0.10159999877214432	0.19030000269412994	0.15129999816417694	0.07989999651908875	0.35019999742507935	0.5076000094413757	0.6966000199317932	0.08179999887943268	0.35260000824928284
LEG_mgen_PhoE-like_NODE_1043_length_14157_cov_64.104847_-_ORF_9__frame_3__translation	Mitochondrion	Mitochondrial transit peptide	Transmembrane	0.2784999907016754	0.17579999566078186	0.2847999930381775	0.094200000166893	0.8130999803543091	0.09070000052452087	0.1264999955892563	0.09600000083446503	0.04560000076889992	0.3321000039577484	0.3930000066757202	0.6883000135421753	0.11389999836683273	0.3409000039100647
LEG_mgen_PRDH_NODE_393_length_25950_cov_52.985981_-_ORF_16__frame_2__translation	Mitochondrion		Peripheral|Soluble	0.4196999967098236	0.06599999964237213	0.1979999989271164	0.14350000023841858	0.612500011920929	0.15539999306201935	0.2215999960899353	0.11259999871253967	0.23160000145435333	0.032099999487400055	0.7235000133514404	0.3560999929904938	0.10649999976158142	0.5379999876022339
LEG_mgen_PRX_NODE_30_length_57405_cov_65.237456_-_ORF_3__frame_1__translation	Cytoplasm		Soluble	0.8447999954223633	0.25920000672340393	0.0640999972820282	0.13379999995231628	0.29280000925064087	0.010999999940395355	0.13899999856948853	0.2061000019311905	0.09619999676942825	0.03290000185370445	0.5268999934196472	0.04820000007748604	0.18369999527931213	0.8069999814033508
LEG_mgen_SCSa_NODE_274_length_30393_cov_26.575861_-_ORF_5__frame_1__translation	Mitochondrion	Mitochondrial transit peptide	Peripheral|Soluble	0.15000000596046448	0.05730000138282776	0.01899999938905239	0.050700001418590546	0.948199987411499	0.007899999618530273	0.0723000019788742	0.02449999935925007	0.0340999998152256	0.03819999843835831	0.6496999859809875	0.11029999703168869	0.061500001698732376	0.7436000108718872
LEG_mgen_SCSa_NODE_1097_length_13586_cov_46.319860_-_ORF_8__frame_3__translation	Mitochondrion	Mitochondrial transit peptide	Peripheral|Soluble	0.17010000348091125	0.06830000132322311	0.01590000092983246	0.08910000324249268	0.9505000114440918	0.005799999926239252	0.051600001752376556	0.03830000013113022	0.04520000144839287	0.027499999850988388	0.6431000232696533	0.10719999670982361	0.07639999687671661	0.7501000165939331
LEG_mgen_SCSa_NODE_4725_length_2769_cov_26.689629_-_ORF_1__frame_3__translation	Mitochondrion	Mitochondrial transit peptide	Peripheral|Soluble	0.133200004696846	0.06920000165700912	0.021900000050663948	0.07259999960660934	0.9467999935150146	0.010599999688565731	0.030500000342726707	0.027899999171495438	0.03629999980330467	0.011900000274181366	0.6208999752998352	0.1054999977350235	0.07559999823570251	0.7541000247001648
LEG_mgen_SCSb_NODE_55_length_49034_cov_58.625902_-_ORF_5__frame_2__translation	Mitochondrion	Mitochondrial transit peptide	Soluble	0.17139999568462372	0.09179999679327011	0.02410000003874302	0.07900000363588333	0.9448999762535095	0.008700000122189522	0.14000000059604645	0.08139999955892563	0.11900000274181366	0.009499999694526196	0.48399999737739563	0.09700000286102295	0.03720000013709068	0.7849000096321106
LEG_mgen_SCSb_NODE_543_length_22092_cov_90.334305_-_ORF_1__frame_1__translation	Mitochondrion	Mitochondrial transit peptide	Soluble	0.17839999496936798	0.09960000216960907	0.01850000023841858	0.0681999996304512	0.9380999803543091	0.004900000058114529	0.11710000038146973	0.061799999326467514	0.08730000257492065	0.00570000009611249	0.5019000172615051	0.08219999819993973	0.036400001496076584	0.7961000204086304
LEG_mgen_SCSb_NODE_3492_length_3991_cov_15.695652_-_ORF_1__frame_3__translation	Mitochondrion	Mitochondrial transit peptide	Soluble	0.1534000039100647	0.10270000249147415	0.019500000402331352	0.07840000092983246	0.9415000081062317	0.004900000058114529	0.131400004029274	0.06430000066757202	0.08959999680519104	0.005900000222027302	0.5092999935150146	0.08900000154972076	0.03530000150203705	0.7868000268936157
LEG_mgen_SDHa_NODE_3787_length_3611_cov_7.977038_-_ORF_1__frame_2__translation	Mitochondrion	Mitochondrial transit peptide	Peripheral|Soluble	0.1607999950647354	0.07410000264644623	0.019300000742077827	0.06960000097751617	0.9718999862670898	0.0031999999191612005	0.07419999688863754	0.04050000011920929	0.08429999649524689	0.02810000069439411	0.7156000137329102	0.15780000388622284	0.07989999651908875	0.6467999815940857
LEG_mgen_SDR_llike_NODE_312_length_28720_cov_31.279719_-_ORF_11__frame_2__translation	Mitochondrion|Endoplasmic reticulum	Transmembrane domain|Mitochondrial transit peptide	Peripheral|Transmembrane	0.2648000121116638	0.16840000450611115	0.11420000344514847	0.131400004029274	0.6995999813079834	0.09790000319480896	0.7127000093460083	0.13650000095367432	0.1273999959230423	0.01860000006854534	0.6406000256538391	0.8184000253677368	0.19939999282360077	0.193900004029274
LEG_mgen_SLC25_NODE_30_length_57405_cov_65.237456_-_ORF_24__frame_2__translation	Mitochondrion		Transmembrane	0.14710000157356262	0.14159999787807465	0.04650000110268593	0.06520000100135803	0.7919999957084656	0.1193000003695488	0.13809999823570251	0.04309999942779541	0.09040000289678574	0.03790000081062317	0.18950000405311584	0.9388999938964844	0.03280000016093254	0.19589999318122864
LEG_mgen_SLC25_NODE_1486_length_10356_cov_40.212533_-_ORF_7__frame_3__translation	Mitochondrion		Transmembrane	0.1500999927520752	0.1648000031709671	0.06289999932050705	0.0706000030040741	0.777899980545044	0.11720000207424164	0.1379999965429306	0.05260000005364418	0.09189999848604202	0.0357000008225441	0.13570000231266022	0.953000009059906	0.04129999876022339	0.1987999975681305
LEG_mgen_SLC25_NODE_2107_length_7113_cov_36.517320_-_ORF_2__frame_2__translation	Mitochondrion		Transmembrane	0.31470000743865967	0.1826999932527542	0.031599998474121094	0.07150000333786011	0.7123000025749207	0.04399999976158142	0.147599995136261	0.050200000405311584	0.13699999451637268	0.028699999675154686	0.1370999962091446	0.9266999959945679	0.03709999844431877	0.24320000410079956
LEG_mgen_SOD_NODE_418_length_25279_cov_52.522384_-_ORF_14__frame_1__translation	Cytoplasm	Nuclear export signal	Soluble	0.8575999736785889	0.3684000074863434	0.031700000166893005	0.09070000052452087	0.1362999975681305	0.04610000178217888	0.20479999482631683	0.3188999891281128	0.20069999992847443	0.07989999651908875	0.41110000014305115	0.08209999650716782	0.06759999692440033	0.7910000085830688
LEG_mgen_SOD_NODE_510_length_22814_cov_23.352449_-_ORF_5__frame_2__translation	Mitochondrion	Mitochondrial transit peptide	Soluble	0.1648000031709671	0.10050000250339508	0.03310000151395798	0.12559999525547028	0.8292999863624573	0.01600000075995922	0.02759999968111515	0.05609999969601631	0.02329999953508377	0.019700000062584877	0.5939000248908997	0.09960000216960907	0.033399999141693115	0.7222999930381775
LEG_mgen_unknown_protein_NODE_2661_length_5442_cov_49.087865_-_ORF_2__frame_1__translation	Cell membrane	Signal peptide|Transmembrane domain	Transmembrane	0.2290000021457672	0.0737999975681305	0.07360000163316727	0.7465999722480774	0.03709999844431877	0.020500000566244125	0.4611000120639801	0.4113999903202057	0.450300008058548	0.035100001841783524	0.13359999656677246	0.9958000183105469	0.210099995136261	0.04500000178813934
LEG_mgen_YMC_NODE_131_length_37631_cov_105.652597_-_ORF_16__frame_1__translation	Mitochondrion	Mitochondrial transit peptide	Transmembrane	0.18160000443458557	0.10819999873638153	0.0340999998152256	0.09799999743700027	0.8780999779701233	0.052000001072883606	0.1898999959230423	0.11680000275373459	0.11320000141859055	0.04039999842643738	0.10379999876022339	0.9438999891281128	0.08669999986886978	0.20110000669956207
LEG_mgen_YMC_NODE_853_length_16423_cov_20.564556_-_ORF_9__frame_2__translation	Mitochondrion	Mitochondrial transit peptide	Transmembrane	0.18359999358654022	0.08829999715089798	0.039500001817941666	0.11749999970197678	0.8416000008583069	0.04960000142455101	0.15410000085830688	0.15410000085830688	0.15770000219345093	0.07930000126361847	0.14399999380111694	0.9243999719619751	0.03929999843239784	0.20749999582767487
LEG_mgen_YMC_NODE_1121_length_13360_cov_65.188468_-_ORF_6__frame_2__translation	Mitochondrion		Transmembrane	0.2296999990940094	0.08730000257492065	0.06480000168085098	0.13420000672340393	0.792900025844574	0.03530000150203705	0.24320000410079956	0.19290000200271606	0.15060000121593475	0.06719999760389328	0.11379999667406082	0.9038000106811523	0.03830000013113022	0.25850000977516174
LEG_MMC_NODE_2741_length_1438_cov_2.306960_g2041_i0_-_ORF_1__frame_2__translation	Mitochondrion	Mitochondrial transit peptide	Transmembrane	0.33180001378059387	0.13019999861717224	0.021400000900030136	0.08429999649524689	0.8719000220298767	0.05260000005364418	0.33970001339912415	0.1420000046491623	0.3278000056743622	0.1500999927520752	0.13079999387264252	0.9190999865531921	0.0551999993622303	0.20340000092983246
LEG_MMC_NODE_4913_length_1034_cov_2.605619_g4088_i0_-_ORF_1__frame_1__translation	Mitochondrion		Transmembrane	0.3499000072479248	0.15889999270439148	0.017400000244379044	0.11060000211000443	0.7814000248908997	0.09030000120401382	0.3174999952316284	0.08879999816417694	0.193900004029274	0.05050000175833702	0.1996999979019165	0.9045000076293945	0.02630000002682209	0.21230000257492065
LEG_MMC_NODE_6448_length_875_cov_5.821696_g5547_i0_-_ORF_1__frame_2__translation	Mitochondrion		Transmembrane	0.3255000114440918	0.1363999992609024	0.026100000366568565	0.12200000137090683	0.8116000294685364	0.041999999433755875	0.2854999899864197	0.10509999841451645	0.14589999616146088	0.047600001096725464	0.22470000386238098	0.9261999726295471	0.029400000348687172	0.15639999508857727
LEG_MMC_NODE_6469_length_873_cov_14.866250_g5567_i0_-_ORF_1__frame_1__translation	Mitochondrion		Transmembrane	0.3018999993801117	0.09549999982118607	0.026100000366568565	0.13220000267028809	0.7527999877929688	0.05770000070333481	0.2524000108242035	0.11249999701976776	0.20569999516010284	0.08810000121593475	0.12349999696016312	0.8084999918937683	0.02669999934732914	0.3192000091075897
LEG_MMSDH_NODE_2163_length_1653_cov_13.353165_g1536_i0_-_ORF_1__frame_3__translation	Mitochondrion	Mitochondrial transit peptide	Soluble	0.2822999954223633	0.17219999432563782	0.04969999939203262	0.061000000685453415	0.8763999938964844	0.013100000098347664	0.041600000113248825	0.0869000032544136	0.03539999946951866	0.001500000013038516	0.487199991941452	0.0892999991774559	0.1460999995470047	0.7365000247955322
LEG_MPPb_NODE_7629_length_782_cov_2.427362_g6688_i0_-_ORF_1__frame_2__translation	Cytoplasm	Nuclear localization signal|Nuclear export signal	Soluble	0.7706000208854675	0.26649999618530273	0.032099999487400055	0.11469999700784683	0.3522999882698059	0.04270000010728836	0.14419999718666077	0.1395999938249588	0.16509999334812164	0.002400000113993883	0.5787000060081482	0.1257999986410141	0.07349999994039536	0.7930999994277954
LEG_OGDH_E2_NODE_2254_length_1611_cov_6.205462_g1617_i0_-_ORF_2__frame_2__translation	Mitochondrion	Mitochondrial transit peptide	Peripheral|Soluble	0.3384999930858612	0.1185000017285347	0.021900000050663948	0.04089999943971634	0.8443999886512756	0.0333000011742115	0.1006999984383583	0.04699999839067459	0.06360000371932983	0.007699999958276749	0.6039999723434448	0.0340999998152256	0.0925000011920929	0.7847999930381775
LEG_P5CDH_NODE_2059_length_1707_cov_20.753366_g1438_i0_-_ORF_1__frame_3__translation	Mitochondrion	Mitochondrial transit peptide	Soluble	0.33640000224113464	0.11129999905824661	0.07010000199079514	0.07880000025033951	0.8105000257492065	0.02329999953508377	0.04580000042915344	0.11620000004768372	0.1103999987244606	0.019500000402331352	0.5813000202178955	0.16429999470710754	0.13660000264644623	0.7475000023841858
LEG_PDH_E1a_NODE_4576_length_1080_cov_2.045680_g3769_i0_-_ORF_1__frame_3__translation	Cytoplasm	Nuclear localization signal	Soluble	0.7645000219345093	0.48240000009536743	0.03150000050663948	0.05950000137090683	0.6039000153541565	0.08290000259876251	0.1867000013589859	0.027799999341368675	0.06849999725818634	0.045899998396635056	0.2459000051021576	0.38019999861717224	0.024800000712275505	0.7145000100135803
LEG_PDH_E1b_NODE_13400_length_508_cov_2.894253_g12291_i0_-_ORF_1__frame_2__translation	Cytoplasm|Nucleus		Soluble	0.5623000264167786	0.7759000062942505	0.07240000367164612	0.05130000039935112	0.13920000195503235	0.022700000554323196	0.11330000311136246	0.12610000371932983	0.1501999944448471	0.09730000048875809	0.4449999928474426	0.08299999684095383	0.09040000289678574	0.7940000295639038
LEG_PDH_E2_NODE_2254_length_1611_cov_6.205462_g1617_i0_-_ORF_2__frame_2__translation	Mitochondrion	Mitochondrial transit peptide	Peripheral|Soluble	0.3384999930858612	0.1185000017285347	0.021900000050663948	0.04089999943971634	0.8443999886512756	0.0333000011742115	0.1006999984383583	0.04699999839067459	0.06360000371932983	0.007699999958276749	0.6039999723434448	0.0340999998152256	0.0925000011920929	0.7847999930381775
LEG_PDH_E3_NODE_2905_length_1387_cov_3.812024_g2192_i0_-_ORF_1__frame_3__translation	Cytoplasm	Nuclear localization signal	Soluble	0.7641000151634216	0.219200000166893	0.19329999387264252	0.34860000014305115	0.2087000012397766	0.2459000051021576	0.07180000096559525	0.17270000278949738	0.16349999606609344	0.05570000037550926	0.4196999967098236	0.20250000059604645	0.11959999799728394	0.6477000117301941
LEG_PEPCK_NODE_1659_length_1973_cov_27.742105_g1098_i0_-_ORF_1__frame_2__translation	Mitochondrion	Mitochondrial transit peptide	Peripheral|Soluble	0.37610000371932983	0.15549999475479126	0.024399999529123306	0.05640000104904175	0.760200023651123	0.008200000040233135	0.15119999647140503	0.09539999812841415	0.07190000265836716	0.01640000008046627	0.6674000024795532	0.10660000145435333	0.10199999809265137	0.7179999947547913
LEG_PGM_NODE_6632_length_859_cov_10.136132_g5725_i0_-_ORF_1__frame_1__translation	Mitochondrion	Mitochondrial transit peptide	Soluble	0.2720000147819519	0.10360000282526016	0.0737999975681305	0.10100000351667404	0.8464999794960022	0.03359999880194664	0.07590000331401825	0.09220000356435776	0.08579999953508377	0.010400000028312206	0.4772999882698059	0.08829999715089798	0.1354999989271164	0.6840000152587891
LEG_PGM_NODE_7126_length_816_cov_2.247645_g6200_i0_-_ORF_1__frame_1__translation	Cytoplasm	Nuclear localization signal	Soluble	0.8500000238418579	0.3424000144004822	0.12020000070333481	0.09539999812841415	0.4634000062942505	0.06350000202655792	0.1039000004529953	0.05739999935030937	0.10980000346899033	0.023000000044703484	0.435699999332428	0.04989999905228615	0.12319999933242798	0.763700008392334
LEG_PGM_NODE_7361_length_799_cov_3.917355_g6428_i0_-_ORF_1__frame_2__translation	Cytoplasm	Nuclear localization signal	Soluble	0.7842000126838684	0.32760000228881836	0.08780000358819962	0.12070000171661377	0.46160000562667847	0.016499999910593033	0.16019999980926514	0.04450000077486038	0.03460000082850456	0.016200000420212746	0.41519999504089355	0.05429999902844429	0.10819999873638153	0.800000011920929
LEG_PGM_NODE_10915_length_601_cov_6.712121_g9818_i0_-_ORF_1__frame_3__translation	Cytoplasm	Nuclear export signal|Peroxisomal targeting signal	Soluble	0.9061999917030334	0.3905999958515167	0.06289999932050705	0.04399999976158142	0.3312000036239624	0.0877000018954277	0.06310000270605087	0.0729999989271164	0.12680000066757202	0.05730000138282776	0.3785000145435333	0.04989999905228615	0.12489999830722809	0.7986000180244446
LEG_PhoE-like_NODE_6449_length_875_cov_3.465087_g5548_i0_-_ORF_1__frame_2__translation	Mitochondrion	Mitochondrial transit peptide	Transmembrane	0.2784999907016754	0.17479999363422394	0.19920000433921814	0.14020000398159027	0.7574999928474426	0.09929999709129333	0.1850000023841858	0.17339999973773956	0.07720000296831131	0.2583000063896179	0.5666999816894531	0.6460999846458435	0.08309999853372574	0.35420000553131104
LEG_PhoE-like_NODE_7080_length_819_cov_4.816354_g6156_i0_-_ORF_1__frame_2__translation	Cytoplasm	Nuclear localization signal	Soluble	0.7645000219345093	0.40619999170303345	0.2003999948501587	0.07090000063180923	0.29030001163482666	0.026599999517202377	0.22460000216960907	0.03290000185370445	0.16760000586509705	0.008299999870359898	0.35199999809265137	0.11490000039339066	0.07829999923706055	0.7330999970436096
LEG_PRDH_NODE_5966_length_916_cov_5.440095_g5085_i0_-_ORF_1__frame_1__translation	Cytoplasm|Mitochondrion		Peripheral	0.5178999900817871	0.4309999942779541	0.053700000047683716	0.14259999990463257	0.7541000247001648	0.16519999504089355	0.1761000007390976	0.14869999885559082	0.15760000050067902	0.06889999657869339	0.725600004196167	0.10119999945163727	0.19349999725818634	0.48010000586509705
LEG_PRX_NODE_7183_length_811_cov_11.707317_g6254_i0_-_ORF_1__frame_3__translation	Cytoplasm		Soluble	0.8447999954223633	0.25920000672340393	0.0640999972820282	0.13379999995231628	0.29280000925064087	0.010999999940395355	0.13899999856948853	0.2061000019311905	0.09619999676942825	0.03290000185370445	0.5268999934196472	0.04820000007748604	0.18369999527931213	0.8069999814033508
LEG_SCSa_NODE_4242_length_1125_cov_7.781369_g3451_i0_-_ORF_2__frame_1__translation	Mitochondrion	Mitochondrial transit peptide	Peripheral|Soluble	0.17010000348091125	0.06830000132322311	0.01590000092983246	0.08910000324249268	0.9505000114440918	0.005799999926239252	0.051600001752376556	0.03830000013113022	0.04520000144839287	0.027499999850988388	0.6431000232696533	0.10719999670982361	0.07639999687671661	0.7501000165939331
LEG_SCSa_NODE_4722_length_1059_cov_11.561866_g3907_i0_-_ORF_2__frame_1__translation	Mitochondrion	Mitochondrial transit peptide	Peripheral|Soluble	0.133200004696846	0.06920000165700912	0.021900000050663948	0.07259999960660934	0.9467999935150146	0.010599999688565731	0.030500000342726707	0.027899999171495438	0.03629999980330467	0.011900000274181366	0.6208999752998352	0.1054999977350235	0.07559999823570251	0.7541000247001648
LEG_SCSa_NODE_5473_length_969_cov_7.498884_g4618_i0_-_ORF_1__frame_2__translation	Mitochondrion	Mitochondrial transit peptide	Peripheral|Soluble	0.13459999859333038	0.07020000368356705	0.0357000008225441	0.038600001484155655	0.9496999979019165	0.024000000208616257	0.08919999748468399	0.019200000911951065	0.031599998474121094	0.08240000158548355	0.6851999759674072	0.14669999480247498	0.10050000250339508	0.699400007724762
LEG_SCSb_NODE_2248_length_1615_cov_5.557069_g1613_i0_-_ORF_2__frame_1__translation	Mitochondrion	Mitochondrial transit peptide	Soluble	0.19210000336170197	0.13590000569820404	0.021900000050663948	0.05779999867081642	0.883899986743927	0.006099999882280827	0.14219999313354492	0.07240000367164612	0.11150000244379044	0.003700000001117587	0.49459999799728394	0.0860000029206276	0.035599999129772186	0.7990999817848206
LEG_SCSb_NODE_4329_length_1113_cov_3.748077_g3534_i0_-_ORF_1__frame_2__translation	Cytoplasm	Nuclear localization signal|Nuclear export signal	Soluble	0.7746999859809875	0.3991999924182892	0.02370000071823597	0.21400000154972076	0.30410000681877136	0.11110000312328339	0.05429999902844429	0.16680000722408295	0.15070000290870667	0.07930000126361847	0.3767000138759613	0.09019999951124191	0.032499998807907104	0.8240000009536743
LEG_SDR_like_NODE_5587_length_957_cov_1.322398_g4726_i0_-_ORF_1__frame_1__translation	Mitochondrion|Endoplasmic reticulum	Transmembrane domain|Mitochondrial transit peptide	Peripheral|Transmembrane	0.2865999937057495	0.15870000422000885	0.03759999945759773	0.24740000069141388	0.7056999802589417	0.04569999873638153	0.781499981880188	0.23109999299049377	0.2070000022649765	0.006500000134110451	0.7742000222206116	0.7281000018119812	0.2793999910354614	0.17970000207424164
LEG_SLC25_NODE_3918_length_1177_cov_5.454710_g3149_i0_-_ORF_1__frame_2__translation	Mitochondrion		Transmembrane	0.22849999368190765	0.2012999951839447	0.02070000022649765	0.0697999969124794	0.7907999753952026	0.07590000331401825	0.1835000067949295	0.06369999796152115	0.11320000141859055	0.03449999913573265	0.1428000032901764	0.9223999977111816	0.03220000118017197	0.2581999897956848
LEG_SLC25_NODE_5413_length_976_cov_3.466224_g4561_i0_-_ORF_1__frame_2__translation	Mitochondrion		Transmembrane	0.21089999377727509	0.19990000128746033	0.02160000056028366	0.07530000060796738	0.7793999910354614	0.07880000025033951	0.1851000040769577	0.07970000058412552	0.1160999983549118	0.019899999722838402	0.15780000388622284	0.9248999953269958	0.04800000041723251	0.21719999611377716
LEG_SLC25_NODE_6213_length_895_cov_2.989051_g5319_i0_-_ORF_1__frame_1__translation	Mitochondrion		Transmembrane	0.23810000717639923	0.19009999930858612	0.023399999365210533	0.0706000030040741	0.7875999808311462	0.07490000128746033	0.1688999980688095	0.07980000227689743	0.12530000507831573	0.01759999990463257	0.17149999737739563	0.9293000102043152	0.04170000180602074	0.21799999475479126
LEG_SOD_NODE_8127_length_745_cov_3.154762_g7167_i0_-_ORF_1__frame_3__translation	Cytoplasm	Nuclear export signal	Soluble	0.8550000190734863	0.3668999969959259	0.02930000051856041	0.0917000025510788	0.13510000705718994	0.04670000076293945	0.20550000667572021	0.31299999356269836	0.19769999384880066	0.06669999659061432	0.4065999984741211	0.08839999884366989	0.06390000134706497	0.7882000207901001
LEG_SOD_NODE_10140_length_636_cov_3.648313_g9054_i0_-_ORF_1__frame_2__translation	Cytoplasm	Peroxisomal targeting signal	Soluble	0.8055999875068665	0.18950000405311584	0.035599999129772186	0.19900000095367432	0.15479999780654907	0.05900000035762787	0.13379999995231628	0.20479999482631683	0.09269999712705612	0.32820001244544983	0.5146999955177307	0.08370000123977661	0.04529999941587448	0.7541000247001648
LEG_TPI_NODE_6160_length_900_cov_8.157195_g5269_i0_-_ORF_1__frame_1__translation	Cytoplasm	Nuclear localization signal	Soluble	0.8708000183105469	0.362199991941452	0.1404000073671341	0.1128000020980835	0.2775999903678894	0.02710000053048134	0.07810000330209732	0.09200000017881393	0.10220000147819519	0.004900000058114529	0.30570000410079956	0.07989999651908875	0.09380000084638596	0.8619999885559082
LEG_TPI_NODE_6502_length_870_cov_8.818068_g5600_i0_-_ORF_1__frame_2__translation	Cytoplasm|Extracellular		Soluble	0.6444000005722046	0.311599999666214	0.6376000046730042	0.14239999651908875	0.5827000141143799	0.07169999927282333	0.15189999341964722	0.21070000529289246	0.3440000116825104	0.053300000727176666	0.3935000002384186	0.05609999969601631	0.1647000014781952	0.8242999911308289
LEG_TPI_NODE_7243_length_807_cov_5.935967_g6313_i0_-_ORF_1__frame_3__translation	Cytoplasm|Extracellular		Soluble	0.6087999939918518	0.2721000015735626	0.6277999877929688	0.17579999566078186	0.5382000207901001	0.10130000114440918	0.12200000137090683	0.1875	0.38190001249313354	0.06939999759197235	0.39730000495910645	0.055399999022483826	0.18320000171661377	0.8141000270843506
LEG_unknown_protein_NODE_8069_length_749_cov_2.137574_g7109_i0_-_ORF_1__frame_3__translation	Mitochondrion		Soluble	0.3564000129699707	0.36340001225471497	0.1882999986410141	0.1981000006198883	0.5831000208854675	0.05220000073313713	0.12489999830722809	0.250900000333786	0.15389999747276306	0.16220000386238098	0.5302000045776367	0.22540000081062317	0.1362999975681305	0.6026999950408936
LEG_YMC_NODE_6385_length_881_cov_2.500000_g5485_i0_-_ORF_1__frame_2__translation	Mitochondrion		Transmembrane	0.2152000069618225	0.10890000313520432	0.02410000003874302	0.14000000059604645	0.6662999987602234	0.014600000344216824	0.27880001068115234	0.10570000112056732	0.1518000066280365	0.21320000290870667	0.2395000010728836	0.9120000004768372	0.05590000003576279	0.20890000462532043
LEG_YMC_NODE_8751_length_709_cov_2.073899_g7720_i0_-_ORF_1__frame_1__translation	Mitochondrion		Transmembrane	0.18050000071525574	0.14589999616146088	0.01759999990463257	0.07609999924898148	0.8208000063896179	0.07479999959468842	0.18940000236034393	0.16859999299049377	0.13189999759197235	0.05860000103712082	0.12729999423027039	0.9420999884605408	0.04729999974370003	0.20059999823570251
LEG_YMC_NODE_9080_length_690_cov_4.118314_g8024_i0_-_ORF_1__frame_1__translation	Mitochondrion		Transmembrane	0.2303999960422516	0.18230000138282776	0.038100000470876694	0.10119999945163727	0.6988999843597412	0.02250000089406967	0.20649999380111694	0.11919999867677689	0.1843000054359436	0.16419999301433563	0.1817999929189682	0.9480999708175659	0.0560000017285347	0.1793999969959259
SIVAB_2OGMC_NODE_8991_length_1017_cov_11.353933_g8044_i0_-_ORF_1__frame_1__translation	Mitochondrion	Mitochondrial transit peptide	Transmembrane	0.1979999989271164	0.08950000256299973	0.024399999529123306	0.13210000097751617	0.8823000192642212	0.03709999844431877	0.22869999706745148	0.10769999772310257	0.2653999924659729	0.023900000378489494	0.14059999585151672	0.8371000289916992	0.029899999499320984	0.25429999828338623
SIVAB_2OGMC_NODE_9604_length_965_cov_16.159905_g8606_i0_-_ORF_1__frame_2__translation	Mitochondrion		Transmembrane	0.3091999888420105	0.1518000066280365	0.022099999710917473	0.19979999959468842	0.7853999733924866	0.06650000065565109	0.2062000036239624	0.09520000219345093	0.16519999504089355	0.09000000357627869	0.14329999685287476	0.9070000052452087	0.01899999938905239	0.20890000462532043
SIVAB_2OGMC_NODE_18160_length_510_cov_5.485640_g16819_i0_-_ORF_1__frame_1__translation	Mitochondrion		Transmembrane	0.2563000023365021	0.06279999762773514	0.04019999876618385	0.2671000063419342	0.652999997138977	0.05420000106096268	0.2743000090122223	0.15940000116825104	0.18299999833106995	0.01889999955892563	0.22910000383853912	0.8335999846458435	0.031099999323487282	0.17180000245571136
SIVAB_AAC_NODE_11027_length_857_cov_22.538356_g9944_i0_-_ORF_1__frame_1__translation	Mitochondrion	Transmembrane domain|Mitochondrial transit peptide	Transmembrane	0.1882999986410141	0.06920000165700912	0.04809999838471413	0.25119999051094055	0.8693000078201294	0.02239999920129776	0.26030001044273376	0.10159999877214432	0.266400009393692	0.03420000150799751	0.15139999985694885	0.8572999835014343	0.042899999767541885	0.2865999937057495
SIVAB_AADH_NODE_4952_length_1469_cov_1.046200_g4354_i0_-_ORF_1__frame_1__translation	Mitochondrion	Mitochondrial transit peptide	Soluble	0.17170000076293945	0.14579999446868896	0.026599999517202377	0.0892999991774559	0.8393999934196472	0.010599999688565731	0.1404000073671341	0.09160000085830688	0.048700001090765	0.0027000000700354576	0.47600001096725464	0.2574999928474426	0.06750000268220901	0.6754999756813049
SIVAB_AAT_NODE_694_length_3165_cov_3.864384_g570_i0_-_ORF_2__frame_3__translation	Mitochondrion	Mitochondrial transit peptide	Soluble	0.25619998574256897	0.15950000286102295	0.018400000408291817	0.0674000009894371	0.7649999856948853	0.041999999433755875	0.05050000175833702	0.09740000218153	0.0737999975681305	0.02250000089406967	0.4878000020980835	0.14429999887943268	0.09629999846220016	0.7432000041007996
SIVAB_AAT_NODE_912_length_2900_cov_2.866571_g570_i1_-_ORF_1__frame_2__translation	Cytoplasm|Nucleus	Peroxisomal targeting signal	Soluble	0.7074000239372253	0.5626000165939331	0.033799998462200165	0.18400000035762787	0.22660000622272491	0.07970000058412552	0.08910000324249268	0.1867000013589859	0.42989999055862427	0.6618000268936157	0.42160001397132874	0.13519999384880066	0.11620000004768372	0.7633000016212463
SIVAB_ACAT_NODE_525_length_3439_cov_6.882246_g417_i0_-_ORF_2__frame_3__translation	Cytoplasm|Mitochondrion	Mitochondrial transit peptide	Soluble	0.6294000148773193	0.1664000004529953	0.009200000204145908	0.0794999971985817	0.6848000288009644	0.017899999395012856	0.11469999700784683	0.11410000175237656	0.06449999660253525	0.40209999680519104	0.5195000171661377	0.10509999841451645	0.14079999923706055	0.7649999856948853
SIVAB_ACO_NODE_5633_length_1376_cov_0.669335_g4978_i0_extraction_-_ORF_2__frame_2__translation	Cytoplasm	Mitochondrial transit peptide	Peripheral|Soluble	0.6844000220298767	0.29580000042915344	0.4643999934196472	0.4259999990463257	0.5511000156402588	0.1761000007390976	0.07280000299215317	0.03229999914765358	0.29980000853538513	0.010599999688565731	0.6252999901771545	0.15389999747276306	0.09560000151395798	0.7088000178337097
SIVAB_ACTE_NODE_21141_length_428_cov_0.694352_g19741_i0_translation	Cytoplasm		Soluble	0.4959000051021576	0.23510000109672546	0.026799999177455902	0.15309999883174896	0.3831000030040741	0.043800000101327896	0.10729999840259552	0.17880000174045563	0.11890000104904175	0.17249999940395355	0.5437999963760376	0.3749000132083893	0.09120000153779984	0.6161999702453613
SIVAB_AK_NODE_19673_length_464_cov_10.540059_g18303_i0_-_ORF_1__frame_1__translation	Cytoplasm		Soluble	0.49970000982284546	0.3993000090122223	0.5228000283241272	0.05959999933838844	0.5213000178337097	0.19840000569820404	0.0868000015616417	0.029400000348687172	0.027000000700354576	0.021299999207258224	0.47519999742507935	0.1941000074148178	0.07729999721050262	0.763700008392334
SIVAB_ALDH_NODE_4161_length_1602_cov_7.536271_g3632_i0_-_ORF_1__frame_2__translation	Mitochondrion	Mitochondrial transit peptide	Soluble	0.33980000019073486	0.24120000004768372	0.039000000804662704	0.10999999940395355	0.7592999935150146	0.010999999940395355	0.06239999830722809	0.08150000125169754	0.03579999879002571	0.005900000222027302	0.3239000141620636	0.12389999628067017	0.26019999384880066	0.757099986076355
SIVAB_ALDH_NODE_4434_length_1550_cov_1.234013_g3880_i0_-_ORF_1__frame_3__translation	Mitochondrion	Mitochondrial transit peptide	Soluble	0.3560999929904938	0.15000000596046448	0.054499998688697815	0.07760000228881836	0.7554000020027161	0.022299999371170998	0.07150000333786011	0.1256999969482422	0.03480000048875809	0.013100000098347664	0.3693000078201294	0.12839999794960022	0.15000000596046448	0.760699987411499
SIVAB_ALT_NODE_1540_length_2402_cov_10.294945_g1305_i0_-_ORF_1__frame_3__translation	Cytoplasm	Nuclear localization signal|Nuclear export signal	Soluble	0.7608000040054321	0.3456999957561493	0.04520000144839287	0.18140000104904175	0.13259999454021454	0.013299999758601189	0.15520000457763672	0.15389999747276306	0.26030001044273376	0.010200000368058681	0.3840000033378601	0.19689999520778656	0.163100004196167	0.7778000235557556
SIVAB_ASCT_NODE_4606_length_1522_cov_2.020789_g4038_i0_-_ORF_1__frame_3__translation	Mitochondrion	Mitochondrial transit peptide	Soluble	0.2831999957561493	0.1459999978542328	0.040300000458955765	0.05939999967813492	0.8648999929428101	0.008999999612569809	0.0771000012755394	0.06400000303983688	0.0575999990105629	0.04910000041127205	0.4424000084400177	0.08619999885559082	0.04190000146627426	0.8137999773025513
SIVAB_ASCT_NODE_6139_length_1312_cov_10.230380_g5432_i0_-_ORF_1__frame_1__translation	Cytoplasm	Nuclear localization signal	Soluble	0.7253000140190125	0.49880000948905945	0.009499999694526196	0.16349999606609344	0.24740000069141388	0.06909999996423721	0.1363999992609024	0.05959999933838844	0.03220000118017197	0.05900000035762787	0.512499988079071	0.08829999715089798	0.066600002348423	0.8014000058174133
SIVAB_AST_NODE_8593_length_1052_cov_4.808649_g7682_i0_-_ORF_1__frame_2__translation	Mitochondrion	Mitochondrial transit peptide	Soluble	0.18889999389648438	0.05510000139474869	0.06109999865293503	0.08659999817609787	0.9606999754905701	0.00559999980032444	0.03269999846816063	0.03720000013709068	0.031599998474121094	0.008500000461935997	0.5042999982833862	0.0934000015258789	0.06920000165700912	0.8323000073432922
SIVAB_ATM1_NODE_2559_length_1985_cov_1.922497_g2207_i0_-_ORF_1__frame_2__translation	Mitochondrion	Mitochondrial transit peptide	Transmembrane	0.06790000200271606	0.07069999724626541	0.01850000023841858	0.1096000000834465	0.9722999930381775	0.019099999219179153	0.041099999099969864	0.04340000078082085	0.0934000015258789	0.05620000138878822	0.27059999108314514	0.972100019454956	0.02070000022649765	0.11900000274181366
SIVAB_ATM1_NODE_2559_length_1985_cov_1.922497_g2207_i0_-_ORF_2__frame_3__translation	Lysosome/Vacuole		Transmembrane	0.1501999944448471	0.24799999594688416	0.010099999606609344	0.17399999499320984	0.5834000110626221	0.026399999856948853	0.37860000133514404	0.5503000020980835	0.11389999836683273	0.08139999955892563	0.5738000273704529	0.7222999930381775	0.050700001418590546	0.3668000102043152
SIVAB_CBS_NODE_4805_length_1492_cov_8.613919_g4227_i0_-_ORF_1__frame_2__translation	Cytoplasm|Nucleus	Nuclear localization signal	Soluble	0.7705000042915344	0.5217999815940857	0.006800000090152025	0.1152999997138977	0.20749999582767487	0.021299999207258224	0.19089999794960022	0.07649999856948853	0.05939999967813492	0.003599999938160181	0.3357999920845032	0.07270000129938126	0.07320000231266022	0.8274999856948853
SIVAB_DnaJ_Jac1-like_NODE_6504_length_1269_cov_22.779335_g5756_i0_-_ORF_1__frame_1__translation	Cytoplasm|Nucleus	Nuclear localization signal	Soluble	0.7581999897956848	0.6015999913215637	0.11860000342130661	0.046799998730421066	0.20100000500679016	0.0348999984562397	0.3402999937534332	0.024700000882148743	0.13220000267028809	0.020999999716877937	0.3506999909877777	0.02199999988079071	0.4862000048160553	0.7714999914169312
SIVAB_DnaJ_Jac1-like_NODE_7422_length_1166_cov_14.942252_g6591_i0_-_ORF_1__frame_2__translation	Cytoplasm|Nucleus	Nuclear localization signal	Soluble	0.6789000034332275	0.7470999956130981	0.10849999636411667	0.04729999974370003	0.17890000343322754	0.02239999920129776	0.5343999862670898	0.0820000022649765	0.1290999948978424	0.00839999970048666	0.421999990940094	0.026100000366568565	0.14139999449253082	0.8349000215530396
SIVAB_DnaK_NODE_2329_length_2060_cov_432.737713_g2007_i0_-_ORF_2__frame_3__translation	Cytoplasm		Soluble	0.7479000091552734	0.2915000021457672	0.4643999934196472	0.11919999867677689	0.3804999887943268	0.0478999987244606	0.20190000534057617	0.2071000039577484	0.2167000025510788	0.019099999219179153	0.5070000290870667	0.0215000007301569	0.3882000148296356	0.8101999759674072
SIVAB_DnaK_NODE_2336_length_2059_cov_432.861284_g2007_i1_-_ORF_2__frame_2__translation	Cytoplasm		Soluble	0.7479000091552734	0.2915000021457672	0.4643999934196472	0.11919999867677689	0.3804999887943268	0.0478999987244606	0.20190000534057617	0.2071000039577484	0.2167000025510788	0.019099999219179153	0.5070000290870667	0.0215000007301569	0.3882000148296356	0.8101999759674072
SIVAB_DnaK_NODE_2341_length_2058_cov_433.045054_g2007_i2_-_ORF_1__frame_1__translation	Cytoplasm		Soluble	0.7479000091552734	0.2915000021457672	0.4643999934196472	0.11919999867677689	0.3804999887943268	0.0478999987244606	0.20190000534057617	0.2071000039577484	0.2167000025510788	0.019099999219179153	0.5070000290870667	0.0215000007301569	0.3882000148296356	0.8101999759674072
SIVAB_DnaK_NODE_2414_length_2033_cov_438.768625_g2007_i3_-_ORF_1__frame_3__translation	Cytoplasm		Soluble	0.7479000091552734	0.2915000021457672	0.4643999934196472	0.11919999867677689	0.3804999887943268	0.0478999987244606	0.20190000534057617	0.2071000039577484	0.2167000025510788	0.019099999219179153	0.5070000290870667	0.0215000007301569	0.3882000148296356	0.8101999759674072
SIVAB_DnaK_NODE_5286_length_1424_cov_226.259830_g2007_i4_-_ORF_1__frame_3__translation	Cytoplasm	Nuclear localization signal|Nuclear export signal	Soluble	0.8064000010490417	0.3458999991416931	0.1451999992132187	0.1378999948501587	0.26499998569488525	0.041099999099969864	0.2653999924659729	0.26910001039505005	0.21469999849796295	0.018699999898672104	0.5317000150680542	0.019500000402331352	0.40139999985694885	0.8019000291824341
SIVAB_E1_NODE_2830_length_1902_cov_1.291268_g2444_i0_-_ORF_2__frame_3__translation	Cytoplasm		Soluble	0.6417999863624573	0.47099998593330383	0.0608999989926815	0.11540000140666962	0.3578000068664551	0.15199999511241913	0.09610000252723694	0.12150000035762787	0.07069999724626541	0.008500000461935997	0.454800009727478	0.06840000301599503	0.041200000792741776	0.8410999774932861
SIVAB_E2_NODE_5092_length_1449_cov_2.684569_g4475_i0_-_ORF_1__frame_1__translation	Mitochondrion	Mitochondrial transit peptide	Peripheral|Soluble	0.2816999852657318	0.08179999887943268	0.02319999970495701	0.04910000041127205	0.8966000080108643	0.014499999582767487	0.07410000264644623	0.03420000150799751	0.06129999831318855	0.01080000028014183	0.6890000104904175	0.03629999980330467	0.07490000128746033	0.7724999785423279
SIVAB_ECH_NODE_7452_length_1162_cov_2.289855_g6619_i0_-_ORF_1__frame_3__translation	Cytoplasm		Soluble	0.7649000287055969	0.325300008058548	0.029100000858306885	0.10329999774694443	0.37059998512268066	0.014700000174343586	0.16599999368190765	0.14429999887943268	0.07209999859333038	0.16539999842643738	0.41990000009536743	0.2214999943971634	0.04170000180602074	0.7379999756813049
SIVAB_ENO_NODE_577_length_3346_cov_40.236409_g465_i0_-_ORF_1__frame_2__translation	Cytoplasm	Nuclear localization signal|Nuclear export signal	Soluble	0.8090999722480774	0.4489000141620636	0.12380000203847885	0.20239999890327454	0.37310001254081726	0.052000001072883606	0.11540000140666962	0.1080000028014183	0.1988999992609024	0.022099999710917473	0.5631999969482422	0.0803999975323677	0.12229999899864197	0.7002000212669373
SIVAB_ENO_NODE_1091_length_2727_cov_18.426154_g911_i0_-_ORF_1__frame_1__translation	Cytoplasm	Nuclear localization signal	Soluble	0.8429999947547913	0.4284999966621399	0.17499999701976776	0.15710000693798065	0.3070000112056732	0.06400000303983688	0.10300000011920929	0.06759999692440033	0.09920000284910202	0.01769999973475933	0.4643000066280365	0.0957999974489212	0.09619999676942825	0.7149999737739563
SIVAB_ENO_NODE_5222_length_1431_cov_4.210890_g4597_i0_-_ORF_2__frame_2__translation	Cytoplasm	Nuclear localization signal	Soluble	0.5746999979019165	0.3716000020503998	0.1818999946117401	0.335099995136261	0.1429000049829483	0.015699999406933784	0.11909999698400497	0.2433999925851822	0.1573999971151352	0.003800000064074993	0.5486000180244446	0.04769999906420708	0.660099983215332	0.704200029373169
SIVAB_FUM_NODE_1942_length_2209_cov_9.361671_g1659_i0_-_ORF_1__frame_3__translation	Cytoplasm	Nuclear localization signal|Nuclear export signal	Soluble	0.7064999938011169	0.47510001063346863	0.053599998354911804	0.2345999926328659	0.1843000054359436	0.11959999799728394	0.1412999927997589	0.25369998812675476	0.13099999725818634	0.11050000041723251	0.5327000021934509	0.13600000739097595	0.10459999740123749	0.6934000253677368
SIVAB_GCSH_part_NODE_16695_length_560_cov_4.147806_g15389_i0_translation_frame_1_reverse	Mitochondrion	Mitochondrial transit peptide	Soluble	0.1842000037431717	0.06270000338554382	0.2897999882698059	0.12210000306367874	0.8942000269889832	0.18700000643730164	0.03610000014305115	0.04879999905824661	0.022700000554323196	0.2434999942779541	0.5820000171661377	0.041099999099969864	0.09040000289678574	0.7685999870300293
SIVAB_GCSL_part_NODE_2488_length_2009_cov_21.958023_g2081_i1_-_ORF_1__frame_3__translation	Cytoplasm	Nuclear localization signal|Nuclear export signal	Soluble	0.8223000168800354	0.3707999885082245	0.07450000196695328	0.16660000383853912	0.22509999573230743	0.12060000002384186	0.19439999759197235	0.18700000643730164	0.19599999487400055	0.04659999907016754	0.4575999975204468	0.16750000417232513	0.10830000042915344	0.663100004196167
SIVAB_GCSL_part_NODE_4745_length_1500_cov_0.693372_g4170_i0_-_ORF_1__frame_2__translation	Mitochondrion	Mitochondrial transit peptide	Peripheral|Soluble	0.16040000319480896	0.06639999896287918	0.02930000051856041	0.052299998700618744	0.9337999820709229	0.016499999910593033	0.06719999760389328	0.02800000086426735	0.021199999377131462	0.016499999910593033	0.6090999841690063	0.23919999599456787	0.08950000256299973	0.6055999994277954
SIVAB_GCSL_part_NODE_4745_length_1500_cov_0.693372_g4170_i0_-_ORF_2__frame_3__translation	Cytoplasm		Soluble	0.8007000088691711	0.34779998660087585	0.10599999874830246	0.12919999659061432	0.27459999918937683	0.17560000717639923	0.3790999948978424	0.22190000116825104	0.23319999873638153	0.14319999516010284	0.4964999854564667	0.12370000034570694	0.12269999831914902	0.5814999938011169
SIVAB_GCST_NODE_7246_length_1185_cov_3.310964_g6427_i0_-_ORF_1__frame_2__translation	Mitochondrion	Mitochondrial transit peptide	Soluble	0.19380000233650208	0.08340000361204147	0.031099999323487282	0.07750000059604645	0.8664000034332275	0.006599999964237213	0.03400000184774399	0.06700000166893005	0.037700001150369644	0.01510000042617321	0.5604000091552734	0.23499999940395355	0.032099999487400055	0.6815000176429749
SIVAB_GcvP_NODE_710_length_3142_cov_13.304809_g585_i0_-_ORF_1__frame_2__translation	Mitochondrion	Mitochondrial transit peptide	Peripheral|Soluble	0.3840999901294708	0.12139999866485596	0.04729999974370003	0.08340000361204147	0.7588000297546387	0.0560000017285347	0.12430000305175781	0.09709999710321426	0.15289999544620514	0.024000000208616257	0.6427000164985657	0.1776999980211258	0.05400000140070915	0.7123000025749207
SIVAB_GcvP_NODE_1733_length_2306_cov_17.332263_g585_i1_-_ORF_1__frame_2__translation	Mitochondrion	Mitochondrial transit peptide	Peripheral|Soluble	0.34290000796318054	0.10719999670982361	0.05249999836087227	0.06870000064373016	0.8373000025749207	0.051899999380111694	0.12070000171661377	0.08839999884366989	0.14480000734329224	0.022700000554323196	0.6480000019073486	0.15520000457763672	0.04659999907016754	0.7508000135421753
SIVAB_GDH_NODE_4952_length_1469_cov_1.046200_g4354_i0_-_ORF_1__frame_1__translation	Mitochondrion	Mitochondrial transit peptide	Soluble	0.17170000076293945	0.14579999446868896	0.026599999517202377	0.0892999991774559	0.8393999934196472	0.010599999688565731	0.1404000073671341	0.09160000085830688	0.048700001090765	0.0027000000700354576	0.47600001096725464	0.2574999928474426	0.06750000268220901	0.6754999756813049
SIVAB_GrpE_NODE_13841_length_686_cov_6.119857_g12628_i0_-_ORF_1__frame_2__translation	Cytoplasm	Nuclear localization signal	Soluble	0.7382000088691711	0.4092999994754791	0.10189999639987946	0.05079999938607216	0.41839998960494995	0.02630000002682209	0.21130000054836273	0.15150000154972076	0.20589999854564667	0.004399999976158142	0.5260999798774719	0.17069999873638153	0.04129999876022339	0.7414000034332275
SIVAB_HIBADH_NODE_386_length_3744_cov_12.737075_g298_i0_-_ORF_2__frame_2__translation	Mitochondrion	Mitochondrial transit peptide	Soluble	0.28870001435279846	0.24709999561309814	0.02969999983906746	0.04529999941587448	0.8331000208854675	0.014100000262260437	0.040800001472234726	0.07599999755620956	0.0494999997317791	0.008299999870359898	0.5328999757766724	0.15620000660419464	0.08020000159740448	0.6779000163078308
SIVAB_Hsp10_NODE_19711_length_463_cov_15.919643_g18341_i0_-_BLAST_Hit_translation	Mitochondrion	Peroxisomal targeting signal	Peripheral|Soluble	0.22210000455379486	0.11940000206232071	0.0052999998442828655	0.047600001096725464	0.7893000245094299	0.05909999832510948	0.017100000753998756	0.031599998474121094	0.004600000102072954	0.2596000134944916	0.6879000067710876	0.023600000888109207	0.06300000101327896	0.746399998664856
SIVAB_HSP60_NODE_3692_length_1691_cov_14.577366_g3208_i0_-_ORF_1__frame_1__translation	Cytoplasm	Nuclear localization signal|Nuclear export signal	Soluble	0.7731999754905701	0.3147999942302704	0.025499999523162842	0.10100000351667404	0.43650001287460327	0.02319999970495701	0.1200999990105629	0.15719999372959137	0.14419999718666077	0.005499999970197678	0.4359999895095825	0.05590000003576279	0.195700004696846	0.775600016117096
SIVAB_HSP60_NODE_4260_length_1584_cov_19.741935_g3723_i0_-_ORF_1__frame_1__translation	Cytoplasm		Soluble	0.7210999727249146	0.2102999985218048	0.04089999943971634	0.07890000194311142	0.43630000948905945	0.014000000432133675	0.1729000061750412	0.11640000343322754	0.10890000313520432	0.008999999612569809	0.48750001192092896	0.10899999737739563	0.1307000070810318	0.7592999935150146
SIVAB_HSP60_NODE_4261_length_1584_cov_17.749485_g3723_i1_translation	Cytoplasm		Soluble	0.7265999913215637	0.2093999981880188	0.044599998742341995	0.07999999821186066	0.4239000082015991	0.01679999940097332	0.1842000037431717	0.12860000133514404	0.1177000030875206	0.012199999764561653	0.48579999804496765	0.11020000278949738	0.13199999928474426	0.7570000290870667
SIVAB_HSP60_NODE_4760_length_1497_cov_33.027737_g4184_i0_-_ORF_1__frame_1__translation	Mitochondrion	Mitochondrial transit peptide	Peripheral|Soluble	0.13539999723434448	0.08669999986886978	0.018699999898672104	0.053599998354911804	0.9071000218391418	0.013500000350177288	0.09480000287294388	0.03319999948143959	0.06539999693632126	0.03819999843835831	0.6420999765396118	0.08460000157356262	0.07039999961853027	0.7886000275611877
SIVAB_HSP60_NODE_18719_length_491_cov_11.288462_g17371_i0_-_ORF_1__frame_2__translation	Cytoplasm		Soluble	0.8102999925613403	0.19830000400543213	0.45010000467300415	0.18140000104904175	0.5450000166893005	0.013700000010430813	0.12890000641345978	0.10689999908208847	0.09860000014305115	0.00860000029206276	0.3968999981880188	0.15410000085830688	0.05429999902844429	0.776199996471405
SIVAB_Hsp90_NODE_1787_length_2278_cov_84.721990_g1517_i0_-_ORF_1__frame_3__translation	Cytoplasm	Nuclear localization signal	Soluble	0.7652999758720398	0.36980000138282776	0.08860000222921371	0.10279999673366547	0.17980000376701355	0.048500001430511475	0.18950000405311584	0.20329999923706055	0.2037999927997589	0.04050000011920929	0.4449999928474426	0.027400000020861626	0.20270000398159027	0.8745999932289124
SIVAB_IscS_2_NODE_5386_length_1410_cov_0.915822_g4749_i0_-_ORF_2__frame_2__translation	Cytoplasm	Nuclear localization signal	Soluble	0.6306999921798706	0.3635999858379364	0.4117000102996826	0.18070000410079956	0.3686999976634979	0.07769999653100967	0.06599999964237213	0.14350000023841858	0.47510001063346863	0.025800000876188278	0.5162000060081482	0.05810000002384186	0.23909999430179596	0.6140999794006348
SIVAB_IscS_NODE_5386_length_1410_cov_0.915822_g4749_i0_-_ORF_1__frame_1__translation	Mitochondrion	Mitochondrial transit peptide	Soluble	0.25760000944137573	0.08659999817609787	0.04259999841451645	0.0925000011920929	0.930400013923645	0.020500000566244125	0.07660000026226044	0.03009999915957451	0.06430000066757202	0.01600000075995922	0.5656999945640564	0.15680000185966492	0.10639999806880951	0.7279000282287598
SIVAB_IscU_NODE_707_length_3146_cov_2.038092_g582_i0_-_ORF_3__frame_2__translation	Cytoplasm		Lipid anchor	0.32420000433921814	0.20679999887943268	0.10869999974966049	0.27079999446868896	0.46149998903274536	0.005499999970197678	0.2401999980211258	0.1599999964237213	0.13850000500679016	0.22290000319480896	0.5516999959945679	0.2565999925136566	0.7954000234603882	0.3630000054836273
SIVAB_MDH_NODE_7705_length_1139_cov_19.993083_g6859_i0_-_ORF_1__frame_2__translation	Mitochondrion	Mitochondrial transit peptide	Peripheral|Soluble	0.22599999606609344	0.08789999783039093	0.04690000042319298	0.1306000053882599	0.954200029373169	0.018799999728798866	0.029400000348687172	0.07680000364780426	0.04729999974370003	0.04320000112056732	0.6309999823570251	0.12479999661445618	0.08529999852180481	0.7120000123977661
SIVAB_MDH_NODE_9327_length_988_cov_25.130081_g8352_i0_-_ORF_1__frame_3__translation	Mitochondrion	Mitochondrial transit peptide	Peripheral|Soluble	0.1996999979019165	0.0681999996304512	0.03629999980330467	0.12049999833106995	0.9571999907493591	0.009200000204145908	0.02930000051856041	0.06379999965429306	0.05339999869465828	0.029400000348687172	0.6974999904632568	0.15119999647140503	0.1039000004529953	0.6614999771118164
SIVAB_ME_NODE_1335_length_2525_cov_89.812344_g1130_i0_-_ORF_1__frame_3__translation	Cytoplasm		Soluble	0.7483000159263611	0.2646999955177307	0.06679999828338623	0.11720000207424164	0.2540999948978424	0.1396999955177307	0.09210000187158585	0.23309999704360962	0.24950000643730164	0.03290000185370445	0.5203999876976013	0.19169999659061432	0.08250000327825546	0.7426000237464905
SIVAB_ME_NODE_1471_length_2444_cov_92.939577_g1130_i1_-_ORF_1__frame_3__translation	Cytoplasm		Soluble	0.7275999784469604	0.27399998903274536	0.06870000064373016	0.11710000038146973	0.26930001378059387	0.12399999797344208	0.09470000118017197	0.2240999937057495	0.24310000240802765	0.03200000151991844	0.5130000114440918	0.1882999986410141	0.08179999887943268	0.7444999814033508
SIVAB_ME_NODE_1563_length_2390_cov_95.159081_g1130_i2_-_ORF_1__frame_3__translation	Cytoplasm		Soluble	0.73089998960495	0.29019999504089355	0.06669999659061432	0.11249999701976776	0.25679999589920044	0.11819999665021896	0.09120000153779984	0.2669000029563904	0.22869999706745148	0.03009999915957451	0.5205000042915344	0.18279999494552612	0.09030000120401382	0.7475000023841858
SIVAB_MMC_NODE_5745_length_1363_cov_3.026699_g5073_i0_-_ORF_1__frame_3__translation	Mitochondrion		Transmembrane	0.27379998564720154	0.09849999845027924	0.014399999752640724	0.14169999957084656	0.8377000093460083	0.0697999969124794	0.2134999930858612	0.15330000221729279	0.22550000250339508	0.17960000038146973	0.21529999375343323	0.9071000218391418	0.045899998396635056	0.17069999873638153
SIVAB_MMC_NODE_11623_length_814_cov_1.751092_g10511_i0_-_ORF_1__frame_2__translation	Mitochondrion	Mitochondrial transit peptide	Transmembrane	0.32659998536109924	0.08940000087022781	0.027699999511241913	0.08560000360012054	0.8525999784469604	0.03920000046491623	0.33550000190734863	0.11980000138282776	0.3003999888896942	0.121799997985363	0.21770000457763672	0.9315999746322632	0.016499999910593033	0.20800000429153442
SIVAB_MMC_NODE_11684_length_810_cov_2.436310_g10567_i0_-_ORF_1__frame_2__translation	Mitochondrion	Mitochondrial transit peptide	Transmembrane	0.3675999939441681	0.07859999686479568	0.06080000102519989	0.06870000064373016	0.8895999789237976	0.03680000081658363	0.24289999902248383	0.10189999639987946	0.22210000455379486	0.0828000009059906	0.21690000593662262	0.9690999984741211	0.037700001150369644	0.12809999287128448
SIVAB_MMC_NODE_11685_length_810_cov_2.260615_g10567_i1_-_ORF_1__frame_2__translation	Mitochondrion	Mitochondrial transit peptide	Transmembrane	0.3675999939441681	0.07859999686479568	0.06080000102519989	0.06870000064373016	0.8895999789237976	0.03680000081658363	0.24289999902248383	0.10189999639987946	0.22210000455379486	0.0828000009059906	0.21690000593662262	0.9690999984741211	0.037700001150369644	0.12809999287128448
SIVAB_MMSDH_NODE_3851_length_1657_cov_11.724183_g3352_i0_-_ORF_1__frame_2__translation	Mitochondrion	Mitochondrial transit peptide	Soluble	0.22669999301433563	0.10670000314712524	0.03060000017285347	0.08110000193119049	0.8970000147819519	0.018799999728798866	0.06539999693632126	0.11819999665021896	0.047600001096725464	0.00430000014603138	0.5957000255584717	0.12939999997615814	0.14990000426769257	0.6480000019073486
SIVAB_MPPa_NODE_377_length_3780_cov_5.963592_g290_i0_-_ORF_2__frame_2__translation	Mitochondrion	Mitochondrial transit peptide	Peripheral|Soluble	0.25609999895095825	0.12229999899864197	0.038600001484155655	0.1307000070810318	0.9366000294685364	0.006399999838322401	0.04039999842643738	0.0940999984741211	0.0681999996304512	0.00839999970048666	0.6811000108718872	0.08919999748468399	0.07440000027418137	0.724399983882904
SIVAB_MPPb_NODE_5295_length_1423_cov_1.989969_g4660_i0_-_ORF_1__frame_3__translation	Cytoplasm|Mitochondrion	Mitochondrial transit peptide	Peripheral|Soluble	0.5878000259399414	0.14839999377727509	0.027799999341368675	0.10670000314712524	0.8080000281333923	0.019300000742077827	0.05719999969005585	0.05209999904036522	0.01720000058412552	0.010700000450015068	0.6069999933242798	0.09719999879598618	0.08309999853372574	0.7286999821662903
SIVAB_P5CDH_NODE_5525_length_1390_cov_10.316706_g4883_i0_-_ORF_1__frame_1__translation	Cytoplasm		Peripheral|Soluble	0.7519999742507935	0.2833999991416931	0.10909999907016754	0.23000000417232513	0.49889999628067017	0.06989999860525131	0.06369999796152115	0.06270000338554382	0.06859999895095825	0.03480000048875809	0.6195999979972839	0.155799999833107	0.16979999840259552	0.755299985408783
SIVAB_P5CDH_NODE_7959_length_1114_cov_27.061803_g7087_i0_-_ORF_1__frame_1__translation	Cytoplasm	Nuclear localization signal	Peripheral|Soluble	0.8055999875068665	0.3321000039577484	0.10419999808073044	0.2094999998807907	0.5479999780654907	0.23170000314712524	0.05490000173449516	0.042399998754262924	0.05130000039935112	0.030700000002980232	0.6337000131607056	0.1632000058889389	0.16259999573230743	0.7368000149726868
SIVAB_PDH_E1a_NODE_5399_length_1408_cov_8.437158_g4762_i0_-_ORF_1__frame_1__translation	Mitochondrion	Mitochondrial transit peptide	Soluble	0.18019999563694	0.10339999943971634	0.015599999576807022	0.052400000393390656	0.835099995136261	0.005799999926239252	0.05660000070929527	0.05530000105500221	0.0348999984562397	0.011800000444054604	0.5202000141143799	0.07829999923706055	0.1290999948978424	0.6715999841690063
SIVAB_PDH_E1b_NODE_4707_length_1506_cov_3.216099_g4136_i0_-_ORF_1__frame_1__translation	Cytoplasm|Nucleus|Peroxisome	Peroxisomal targeting signal	Soluble	0.6215000152587891	0.5331000089645386	0.03920000046491623	0.33730000257492065	0.2551000118255615	0.054099999368190765	0.33820000290870667	0.2660999894142151	0.20020000636577606	0.8037999868392944	0.3862999975681305	0.08969999849796295	0.11150000244379044	0.7814000248908997
SIVAB_PDH_E1b_NODE_7286_length_1181_cov_4.038899_g4136_i1_-_ORF_1__frame_3__translation	Cytoplasm|Nucleus	Peroxisomal targeting signal	Soluble	0.6075999736785889	0.5547999739646912	0.05220000073313713	0.24300000071525574	0.2526000142097473	0.0625	0.25360000133514404	0.25429999828338623	0.20579999685287476	0.6029999852180481	0.3695000112056732	0.1103999987244606	0.08259999752044678	0.7746999859809875
SIVAB_PDH_E1b_NODE_9216_length_999_cov_3.802752_g8251_i0_-_ORF_1__frame_1__translation	Cytoplasm|Nucleus	Peroxisomal targeting signal	Soluble	0.5921000242233276	0.5523999929428101	0.04610000178217888	0.26100000739097595	0.30390000343322754	0.08229999989271164	0.17739999294281006	0.1535000056028366	0.1429000049829483	0.4075999855995178	0.32589998841285706	0.14720000326633453	0.10189999639987946	0.7555000185966492
SIVAB_PDH_E2_NODE_5092_length_1449_cov_2.684569_g4475_i0_-_ORF_1__frame_1__translation	Mitochondrion	Mitochondrial transit peptide	Peripheral|Soluble	0.2816999852657318	0.08179999887943268	0.02319999970495701	0.04910000041127205	0.8966000080108643	0.014499999582767487	0.07410000264644623	0.03420000150799751	0.06129999831318855	0.01080000028014183	0.6890000104904175	0.03629999980330467	0.07490000128746033	0.7724999785423279
SIVAB_PDH_E3_NODE_2418_length_2032_cov_21.685039_g2081_i0_-_ORF_1__frame_3__translation	Cytoplasm	Nuclear localization signal|Nuclear export signal	Soluble	0.8223000168800354	0.3707999885082245	0.07450000196695328	0.16660000383853912	0.22509999573230743	0.12060000002384186	0.19439999759197235	0.18700000643730164	0.19599999487400055	0.04659999907016754	0.4575999975204468	0.16750000417232513	0.10830000042915344	0.663100004196167
SIVAB_PDH_E3_NODE_2488_length_2009_cov_21.958023_g2081_i1_-_ORF_1__frame_3__translation	Cytoplasm	Nuclear localization signal|Nuclear export signal	Soluble	0.8223000168800354	0.3707999885082245	0.07450000196695328	0.16660000383853912	0.22509999573230743	0.12060000002384186	0.19439999759197235	0.18700000643730164	0.19599999487400055	0.04659999907016754	0.4575999975204468	0.16750000417232513	0.10830000042915344	0.663100004196167
SIVAB_PEPCK_NODE_2502_length_2005_cov_162.067093_g2156_i0_-_ORF_1__frame_2__translation	Mitochondrion	Mitochondrial transit peptide	Peripheral|Soluble	0.2842000126838684	0.14030000567436218	0.029100000858306885	0.09049999713897705	0.9124000072479248	0.008299999870359898	0.09380000084638596	0.11460000276565552	0.08760000020265579	0.006099999882280827	0.6658999919891357	0.08640000224113464	0.0997999981045723	0.7522000074386597
SIVAB_PEPCK_NODE_2544_length_1990_cov_146.420290_g2156_i1_-_ORF_1__frame_2__translation	Mitochondrion	Mitochondrial transit peptide	Peripheral|Soluble	0.2897000014781952	0.13860000669956207	0.030799999833106995	0.09160000085830688	0.9085000157356262	0.00800000037997961	0.09929999709129333	0.11749999970197678	0.09009999781847	0.00559999980032444	0.6636999845504761	0.08500000089406967	0.09889999777078629	0.7559000253677368
SIVAB_PGM_NODE_10687_length_882_cov_28.018543_g9624_i0_-_ORF_1__frame_2__translation	Mitochondrion	Mitochondrial transit peptide	Soluble	0.3837999999523163	0.18289999663829803	0.0729999989271164	0.09839999675750732	0.8034999966621399	0.017000000923871994	0.09830000251531601	0.06279999762773514	0.053300000727176666	0.018200000748038292	0.47690001130104065	0.09430000185966492	0.09589999914169312	0.6984000205993652
SIVAB_PGM_NODE_10822_length_872_cov_10.813423_g9750_i0_-_ORF_1__frame_3__translation	Cytoplasm	Nuclear localization signal	Soluble	0.9031000137329102	0.34470000863075256	0.04529999941587448	0.08649999648332596	0.48570001125335693	0.021199999377131462	0.12129999697208405	0.05000000074505806	0.08060000091791153	0.0210999995470047	0.36809998750686646	0.0471000000834465	0.08579999953508377	0.8317999839782715
SIVAB_PhoE-like_NODE_10564_length_891_cov_3.630890_g9506_i0_-_ORF_1__frame_1__translation	Mitochondrion		Transmembrane	0.2775999903678894	0.14589999616146088	0.29019999504089355	0.1834000051021576	0.7193999886512756	0.13289999961853027	0.10080000013113022	0.10170000046491623	0.04859999939799309	0.3596000075340271	0.34880000352859497	0.7718999981880188	0.08590000122785568	0.3912000060081482
SIVAB_PhoE-like_NODE_11200_length_843_cov_1.976257_g10108_i0_-_ORF_1__frame_3__translation	Mitochondrion		Transmembrane	0.2989000082015991	0.15160000324249268	0.3158999979496002	0.1923999935388565	0.6942999958992004	0.13510000705718994	0.10719999670982361	0.11060000211000443	0.05590000003576279	0.3659000098705292	0.36959999799728394	0.761900007724762	0.10409999638795853	0.3779999911785126
SIVAB_PhoE-like_NODE_11663_length_812_cov_0.713869_g10547_i0_-_ORF_1__frame_3__translation	Cytoplasm|Nucleus	Nuclear localization signal|Nuclear export signal	Soluble	0.8095999956130981	0.6449999809265137	0.042899999767541885	0.09390000253915787	0.31520000100135803	0.008799999952316284	0.15870000422000885	0.11919999867677689	0.10180000215768814	0.0044999998062849045	0.34540000557899475	0.06849999725818634	0.10189999639987946	0.7821999788284302
SIVAB_PRX_NODE_1021_length_2790_cov_4.997747_g847_i0_-_ORF_1__frame_3__translation	Cytoplasm		Soluble	0.8119999766349792	0.22310000658035278	0.07339999824762344	0.11309999972581863	0.219200000166893	0.0357000008225441	0.30660000443458557	0.18790000677108765	0.19009999930858612	0.01769999973475933	0.5794000029563904	0.07109999656677246	0.11299999803304672	0.7524999976158142
SIVAB_PRX_NODE_17727_length_523_cov_23.664141_g16398_i0_-_ORF_1__frame_1__translation	Cytoplasm		Peripheral|Soluble	0.7842000126838684	0.30550000071525574	0.08980000019073486	0.13950000703334808	0.4553000032901764	0.025100000202655792	0.5591999888420105	0.1468999981880188	0.07349999994039536	0.07249999791383743	0.6751999855041504	0.17030000686645508	0.15279999375343323	0.6600000262260437
SIVAB_SCSa_NODE_10265_length_912_cov_3.382166_g9227_i0_-_ORF_1__frame_1__translation	Mitochondrion	Mitochondrial transit peptide	Peripheral|Soluble	0.1858000010251999	0.08889999985694885	0.013799999840557575	0.0697999969124794	0.9182999730110168	0.003100000089034438	0.040300000458955765	0.03840000182390213	0.0357000008225441	0.01209999993443489	0.6425999999046326	0.12919999659061432	0.08609999716281891	0.7315000295639038
SIVAB_SCSb_NODE_1179_length_2655_cov_14.745649_g988_i0_-_ORF_1__frame_1__translation	Mitochondrion	Mitochondrial transit peptide	Soluble	0.2653000056743622	0.11590000241994858	0.034299999475479126	0.09969999641180038	0.8815000057220459	0.01940000057220459	0.16459999978542328	0.05909999832510948	0.17900000512599945	0.014100000262260437	0.4902999997138977	0.10729999840259552	0.050700001418590546	0.7724000215530396
SIVAB_SDR_like_NODE_7545_length_1154_cov_81.286271_g6708_i0_-_ORF_1__frame_3__translation	Endoplasmic reticulum	Signal peptide|Transmembrane domain	Transmembrane	0.30660000443458557	0.19140000641345978	0.039400000125169754	0.13989999890327454	0.31220000982284546	0.031199999153614044	0.9101999998092651	0.20829999446868896	0.31380000710487366	0.0035000001080334187	0.5870000123977661	0.7272999882698059	0.30250000953674316	0.2660999894142151
SIVAB_SLC25_NODE_1681_length_2335_cov_0.720562_g1422_i0_-_ORF_2__frame_3__translation	Mitochondrion		Transmembrane	0.20999999344348907	0.1876000016927719	0.01759999990463257	0.07360000163316727	0.8126000165939331	0.06430000066757202	0.15449999272823334	0.048500001430511475	0.07620000094175339	0.01549999974668026	0.18700000643730164	0.9175999760627747	0.03869999945163727	0.2395000010728836
SIVAB_SLC25_NODE_12381_length_765_cov_0.710031_g11226_i0_-_ORF_1__frame_2__translation	Mitochondrion		Transmembrane	0.2092999964952469	0.1347000002861023	0.03310000151395798	0.09350000321865082	0.7890999913215637	0.09399999678134918	0.20550000667572021	0.10530000180006027	0.2313999980688095	0.03189999982714653	0.27160000801086426	0.9444000124931335	0.03759999945759773	0.12559999525547028
SIVAB_SOD_NODE_12976_length_732_cov_1.242975_g11800_i0_-_ORF_1__frame_3__translation	Cytoplasm	Peroxisomal targeting signal	Soluble	0.8234000205993652	0.2280000001192093	0.0828000009059906	0.10249999910593033	0.336899995803833	0.2483000010251999	0.14810000360012054	0.32409998774528503	0.1679999977350235	0.2847000062465668	0.5884000062942505	0.061500001698732376	0.061000000685453415	0.7587000131607056
SIVAB_SOD_NODE_15769_length_597_cov_6.721277_g14495_i0_-_ORF_1__frame_2__translation	Cytoplasm	Peroxisomal targeting signal	Soluble	0.8429999947547913	0.3330000042915344	0.10320000350475311	0.1290999948978424	0.4099000096321106	0.2425999939441681	0.2574000060558319	0.4674000144004822	0.3375000059604645	0.45590001344680786	0.5637999773025513	0.06700000166893005	0.09640000015497208	0.7515000104904175
SIVAB_TPI_NODE_12038_length_786_cov_47.743551_g10906_i0_-_ORF_1__frame_2__translation	Cytoplasm|Nucleus	Nuclear localization signal	Soluble	0.886900007724762	0.5706999897956848	0.0568000003695488	0.24140000343322754	0.3176000118255615	0.01640000008046627	0.08799999952316284	0.09009999781847	0.1404000073671341	0.014800000004470348	0.36640000343322754	0.06909999996423721	0.10140000283718109	0.8258000016212463
SIVAB_TPI_NODE_14958_length_631_cov_19.825397_g13709_i0_-_ORF_1__frame_2__translation	Extracellular|Mitochondrion	Peroxisomal targeting signal	Soluble	0.41659998893737793	0.4032000005245209	0.6516000032424927	0.1282999962568283	0.6610999703407288	0.02759999968111515	0.1657000035047531	0.25999999046325684	0.3490999937057495	0.28299999237060547	0.39730000495910645	0.05079999938607216	0.1768999993801117	0.8288000226020813
SIVAB_unknown_protein_NODE_3302_length_1777_cov_1.863636_g2868_i0_-_ORF_1__frame_1__translation	Cell membrane	Signal peptide|Transmembrane domain	Transmembrane	0.2054000049829483	0.0681999996304512	0.08619999885559082	0.7483000159263611	0.048500001430511475	0.029400000348687172	0.47279998660087585	0.5270000100135803	0.46230000257492065	0.04259999841451645	0.1273999959230423	0.9951000213623047	0.17839999496936798	0.04960000142455101
SIVAB_YMC_NODE_8409_length_1069_cov_3.092357_g7510_i0_-_ORF_1__frame_2__translation	Mitochondrion	Mitochondrial transit peptide	Transmembrane	0.28949999809265137	0.18250000476837158	0.032999999821186066	0.1404000073671341	0.7576000094413757	0.04439999908208847	0.17919999361038208	0.12479999661445618	0.13449999690055847	0.133200004696846	0.14820000529289246	0.9212999939918518	0.050200000405311584	0.26750001311302185
SIVAB_YMC_NODE_9430_length_980_cov_7.071512_g8449_i0_-_ORF_1__frame_1__translation	Mitochondrion	Transmembrane domain|Mitochondrial transit peptide	Transmembrane	0.16619999706745148	0.07750000059604645	0.03539999946951866	0.2003999948501587	0.8791999816894531	0.03269999846816063	0.24580000340938568	0.2207999974489212	0.21610000729560852	0.08240000158548355	0.1542000025510788	0.9128000140190125	0.03869999945163727	0.1915999948978424
SIVAB_YMC_NODE_13930_length_681_cov_5.209386_g12713_i0_-_ORF_1__frame_2__translation	Mitochondrion	Transmembrane domain|Mitochondrial transit peptide	Transmembrane	0.12290000170469284	0.07270000129938126	0.028200000524520874	0.10649999976158142	0.8661999702453613	0.010700000450015068	0.11479999870061874	0.10769999772310257	0.19349999725818634	0.11819999665021896	0.23579999804496765	0.9488999843597412	0.03099999949336052	0.1657000035047531
LEG_mgen_TIM17_NODE_148_length_36712_cov_57.623179_-_ORF_7__frame_2__translation	Mitochondrion	Transmembrane domain	Transmembrane	0.23170000314712524	0.05260000005364418	0.036400001496076584	0.17299999296665192	0.79339998960495	0.24650000035762787	0.2558000087738037	0.3792000114917755	0.32749998569488525	0.13809999823570251	0.3587000072002411	0.9722999930381775	0.019999999552965164	0.10189999639987946
LEG_mgen_TIM50_NODE_2548_length_5695_cov_35.354885_-_ORF_2__frame_1__translation	Cytoplasm	Nuclear localization signal	Peripheral|Soluble	0.7160000205039978	0.22550000250339508	0.11289999634027481	0.11649999767541885	0.23160000145435333	0.02879999950528145	0.20190000534057617	0.10509999841451645	0.1437000036239624	0.0008999999845400453	0.6295999884605408	0.08470000326633453	0.07259999960660934	0.6646999716758728
LEG_TIM17_part_NODE_22767_length_324_cov_1.633466_g21647_i0_extraction_translation_frame_1_reverse	Mitochondrion	Transmembrane domain	Transmembrane	0.22669999301433563	0.024399999529123306	0.07119999825954437	0.2533999979496002	0.7046999931335449	0.19359999895095825	0.24899999797344208	0.38449999690055847	0.38600000739097595	0.025200000032782555	0.23600000143051147	0.9635999798774719	0.025499999523162842	0.14730000495910645
LEG_TIM50_NODE_6640_length_858_cov_2.542675_g5733_i0_-_ORF_1__frame_2__translation	Endoplasmic reticulum	Signal peptide	Peripheral	0.37059998512268066	0.15520000457763672	0.07649999856948853	0.23109999299049377	0.40790000557899475	0.007600000128149986	0.6967999935150146	0.37439998984336853	0.4406000077724457	0.020899999886751175	0.8384000062942505	0.3237999975681305	0.17149999737739563	0.32580000162124634
SIVAB_TIM17_NODE_17180_length_542_cov_0.674699_g15861_i0_-_ORF_1__frame_2__translation	Mitochondrion	Transmembrane domain	Transmembrane	0.2232999950647354	0.05139999836683273	0.02810000069439411	0.14959999918937683	0.7627999782562256	0.2816999852657318	0.1995999962091446	0.38179999589920044	0.40209999680519104	0.09229999780654907	0.3095000088214874	0.9732999801635742	0.028200000524520874	0.11649999767541885
SIVAB_TIM50_NODE_2514_length_2002_cov_2.318400_g2166_i0_-_ORF_1__frame_2__translation	Mitochondrion	Transmembrane domain	Peripheral|Transmembrane	0.14309999346733093	0.13210000097751617	0.07339999824762344	0.08760000020265579	0.817300021648407	0.12219999730587006	0.42719998955726624	0.14470000565052032	0.18299999833106995	0.05130000039935112	0.6887999773025513	0.7189000248908997	0.05620000138878822	0.2134999930858612

## Sheet: TargetP 2.0
PROTEIN	Prediction	OTHER	SP	mTP	CS Position
LEG_2OGMC_NODE_4889_length_1036_cov_4.713396_g4064_i0_-_ORF_1__frame_1__translation	OTHER	0.997676	0.001395	0.000929
LEG_2OGMC_NODE_5262_length_992_cov_12.812840_g4417_i0_-_ORF_1__frame_3__translation	OTHER	0.924442	0.062333	0.013225
LEG_2OGMC_NODE_5815_length_932_cov_17.351572_g4941_i0_-_ORF_1__frame_1__translation	OTHER	0.864907	0.118941	0.016152
LEG_AAC_NODE_4433_length_1098_cov_45.525854_g3633_i0_-_ORF_1__frame_2__translation	OTHER	0.972846	0.025280	0.001874
LEG_AAC_NODE_6009_length_913_cov_2.578571_g5127_i0_-_ORF_1__frame_1__translation	OTHER	0.954377	0.002485	0.043138
LEG_AAC_NODE_6732_length_848_cov_11.069677_g5822_i0_-_ORF_1__frame_2__translation	OTHER	0.995668	0.000935	0.003397
LEG_AAC_NODE_7228_length_808_cov_3.068027_g6299_i0_-_ORF_1__frame_3__translation	OTHER	0.977398	0.003269	0.019333
LEG_AADH_NODE_2409_length_1546_cov_13.942974_g1752_i0_-_ORF_1__frame_2__translation	mTP	0.046768	0.000007	0.953225	CS pos: 27-28. RRF-SS. Pr: 0.8755
LEG_AADH_NODE_2489_length_1520_cov_13.541120_g1817_i0_-_ORF_1__frame_2__translation	mTP	0.160616	0.000220	0.839164	CS pos: 33-34. RNF-SS. Pr: 0.8481
LEG_AAT_NODE_2375_length_1561_cov_19.768817_g1723_i0_-_ORF_1__frame_1__translation	OTHER	0.579622	0.010907	0.409471
LEG_ACAT_NODE_3053_length_1349_cov_29.074451_g2325_i0_-_ORF_1__frame_1__translation	OTHER	0.810801	0.010995	0.178204
LEG_ACAT_NODE_3276_length_1299_cov_20.355628_g2541_i0_-_ORF_1__frame_3__translation	mTP	0.094617	0.004563	0.900820	CS pos: 19-20. IVN-GK. Pr: 0.2772
LEG_ACC_NODE_4307_length_1115_cov_3.511516_g3514_i0_-_ORF_1__frame_2__translation	OTHER	0.541497	0.388519	0.069984
LEG_ACTE_NODE_12614_length_534_cov_16.075922_g11507_i0_-_ORF_1__frame_1__translation	OTHER	0.997655	0.000186	0.002159
LEG_AK_NODE_7992_length_754_cov_19.512482_g7033_i0_-_ORF_1__frame_2__translation	OTHER	0.553732	0.283238	0.163030
LEG_ALDH_NODE_5194_length_1000_cov_5.677454_g4350_i0_-_ORF_1__frame_3__translation	OTHER	0.567940	0.348540	0.083520
LEG_ALT_NODE_2511_length_1511_cov_12.482615_g1835_i0_-_ORF_2__frame_2__translation	OTHER	0.999645	0.000103	0.000252
LEG_ASCT_NODE_2346_length_1569_cov_54.854278_g1695_i0_-_ORF_1__frame_2__translation	OTHER	0.863364	0.001778	0.134858
LEG_ASCT_NODE_2408_length_1546_cov_31.947047_g1751_i0_-_ORF_1__frame_2__translation	mTP	0.393071	0.003168	0.603761	CS pos: 19-20. KTF-SS. Pr: 0.3679
LEG_AST_NODE_1652_length_9363_cov_23.758553_-_ORF_5__frame_1__translation	mTP	0.048799	0.000895	0.950307	CS pos: 21-22. KSF-SS. Pr: 0.3156
LEG_ATM1_partial_NODE_34012_length_251_cov_0.876404_g32892_i0_extraction_translation_frame_2_reverse	OTHER	0.668781	0.004589	0.326630
LEG_CBS_NODE_2288_length_1595_cov_8.680026_g1649_i0_-_ORF_1__frame_1__translation	OTHER	0.999959	0.000024	0.000017
LEG_DnaJ_Jac1-like_NODE_2868_length_1401_cov_15.899096_g2157_i0_-_ORF_1__frame_1__translation	OTHER	0.997621	0.000572	0.001807
LEG_DnaJ_Jac1-like_NODE_3155_length_1324_cov_11.387690_g2426_i0_-_ORF_1__frame_1__translation	OTHER	0.999603	0.000099	0.000297
LEG_DnaJ_NODE_6246_length_892_cov_3.452991_g5350_i0_-_ORF_1__frame_2__translation	OTHER	0.999695	0.000087	0.000218
LEG_DnaK_NODE_1545_length_2083_cov_40.971144_g1002_i0_-_ORF_1__frame_1__translation	OTHER	0.999631	0.000099	0.000270
LEG_ECH_NODE_4311_length_1115_cov_2.821497_g3518_i0_-_ORF_2__frame_3__translation	OTHER	0.998599	0.000325	0.001076
LEG_ENO_cyto_NODE_3042_length_1351_cov_10.991393_g2315_i0_-_ORF_1__frame_2__translation	OTHER	0.989990	0.002896	0.007114
LEG_ENO_NODE_2519_length_1508_cov_13.321254_g1843_i0_-_ORF_1__frame_2__translation	mTP	0.072985	0.005322	0.921693	CS pos: 22-23. SFF-SS. Pr: 0.6309
LEG_ENO_NODE_2595_length_1480_cov_15.297797_g1904_i0_-_ORF_1__frame_2__translation	mTP	0.090740	0.000661	0.908600	CS pos: 32-33. SFF-SS. Pr: 0.6764
LEG_FUM_NODE_2454_length_1533_cov_6.770548_g1787_i0_-_ORF_1__frame_3__translation	OTHER	0.751342	0.000264	0.248393
LEG_GCSH_NODE_18455_length_384_cov_9_633441_g17335_i0_translation_frame_2_reverse	OTHER	0.616991	0.000219	0.382790
LEG_GCSL_NODE_2905_length_1387_cov_3.812024_g2192_i0_-_ORF_1__frame_3__translation	OTHER	0.989990	0.000588	0.009422
LEG_GCST_NODE_3560_length_1244_cov_7.789069_g2813_i0_-_ORF_1__frame_1__translation	mTP	0.194960	0.000449	0.804591	CS pos: 10-11. SFF-SS. Pr: 0.4286
LEG_GcvP_fused_NODE_995_length_3055_cov_7.581489_g566_i0_-_ORF_2__frame_2__translation	OTHER	0.892367	0.107031	0.000601
LEG_GcvP_fused_NODE_2333_length_6403_cov_20.343372_-_ORF_3__frame_3__translation	OTHER	0.998161	0.000837	0.001002
LEG_GcvP_NODE_995_length_3055_cov_7.581489_g566_i0_-_ORF_1__frame_1__translation	mTP	0.122919	0.001634	0.875447	CS pos: 30-31. VKL-IS. Pr: 0.1805
LEG_GDH_NODE_2144_length_1663_cov_7.514465_g1519_i0_translation	OTHER	0.996702	0.000448	0.002850
LEG_GDH_NODE_2427_length_1542_cov_5.198094_g1766_i0_-_ORF_1__frame_1__translation	mTP	0.174961	0.000934	0.824105	CS pos: 27-28. RSF-SV. Pr: 0.8130
LEG_GrpE_NODE_5589_length_956_cov_5.771234_g4728_i0_-_ORF_1__frame_2__translation	OTHER	0.714031	0.000031	0.285937
LEG_GSCL_NODE_5631_length_952_cov_4.526735_g4766_i0_-_ORF_1__frame_2__translation	OTHER	0.998170	0.001632	0.000198
LEG_HIBADH_NODE_5234_length_995_cov_105.456616_g4390_i0_-_ORF_1__frame_1__translation	OTHER	0.753083	0.000569	0.246348
LEG_HIBADH_NODE_5721_length_941_cov_7.737327_g4851_i0_-_ORF_1__frame_3__translation	OTHER	0.584876	0.005291	0.409833
LEG_Hsp10_NODE_17382_length_405_cov_3.415663_g16264_i0_-_BLAST_Hit_translation	OTHER	0.528898	0.000983	0.470119
LEG_HSP60_NODE_1866_length_1812_cov_14.726279_g1275_i0_-_ORF_1__frame_3__translation	mTP	0.094524	0.001366	0.904110	CS pos: 27-28. MNF-SG. Pr: 0.4452
LEG_HSP60_NODE_1910_length_1786_cov_8.406305_g1311_i0_-_ORF_1__frame_1__translation	mTP	0.134113	0.000217	0.865670	CS pos: 26-27. RFF-SE. Pr: 0.6279
LEG_HSP60_NODE_1923_length_1780_cov_24.185120_g1324_i0_-_ORF_1__frame_1__translation	mTP	0.178239	0.005020	0.816741	CS pos: 26-27. MNF-SG. Pr: 0.4651
LEG_Hsp90_NODE_1428_length_2217_cov_19.714552_g905_i0_-_ORF_1__frame_3__translation	OTHER	0.999748	0.000178	0.000075
LEG_IBD_NODE_11774_length_567_cov_1_900810_g10672_i0_translation_frame_3_reverse	OTHER	0.987555	0.000017	0.012428
LEG_IscU_NODE_13193_length_515_cov_2.194570_g12086_i0_-_ORF_1__frame_3__translation	OTHER	0.825505	0.002151	0.172343
LEG_MDH_NODE_4799_length_1050_cov_20.103378_g3983_i0_-_ORF_1__frame_1__translation	mTP	0.233108	0.001728	0.765164	CS pos: 10-11. AAF-ST. Pr: 0.5886
LEG_ME_NODE_1398_length_2251_cov_18.075758_g882_i0_-_ORF_1__frame_1__translation	OTHER	0.997931	0.001956	0.000113
LEG_mgen_2OGMC_NODE_82_length_43555_cov_76.820646_-_ORF_11__frame_1__translation	OTHER	0.840336	0.141297	0.018367
LEG_mgen_2OGMC_NODE_132_length_37501_cov_21.001953_-_ORF_13__frame_2__translation	OTHER	0.997676	0.001395	0.000929
LEG_mgen_2OGMC_NODE_5580_length_2296_cov_30.212079_-_ORF_1__frame_1__translation	OTHER	0.864907	0.118941	0.016152
LEG_mgen_AAC_NODE_391_length_26035_cov_42.379419_-_ORF_19__frame_3__translation	OTHER	0.958538	0.025486	0.015977
LEG_mgen_AAC_NODE_1641_length_9412_cov_35.674744_-_ORF_1__frame_1__translation	OTHER	0.972846	0.025280	0.001874
LEG_mgen_AAC_NODE_4136_length_3270_cov_6.534203_-_ORF_1__frame_1__translation	SP	0.011932	0.988035	0.000033	CS pos: 20-21. ITT-EK. Pr: 0.8594
LEG_mgen_AAC_NODE_5072_length_2548_cov_30.002478_-_ORF_1__frame_1__translation	SP	0.076166	0.890267	0.033567	CS pos: 19-20. VTT-RK. Pr: 0.6914
LEG_mgen_AAC_NODE_11147_length_1013_cov_16.349887_-_ORF_1__frame_1__translation	OTHER	0.995668	0.000935	0.003397
LEG_mgen_AADH_NODE_274_length_30393_cov_26.575861_-_ORF_19__frame_2__translation	mTP	0.011426	0.000003	0.988571	CS pos: 28-29. RKF-SS. Pr: 0.7447
LEG_mgen_AADH_NODE_1097_length_13586_cov_46.319860_-_ORF_6__frame_2__translation	mTP	0.002558	0.000001	0.997441	CS pos: 28-29. RRF-SS. Pr: 0.8778
LEG_mgen_AADH_NODE_1728_length_8887_cov_37.692237_-_ORF_3__frame_1__translation	mTP	0.004431	0.000006	0.995562	CS pos: 28-29. RNF-SS. Pr: 0.8420
LEG_mgen_AAT_NODE_1415_length_10876_cov_21.302726_-_ORF_5__frame_2__translation	OTHER	0.579622	0.010907	0.409471
LEG_mgen_AAT_NODE_4017_length_3368_cov_15.482567_-_ORF_2__frame_2__translation	mTP	0.183028	0.000331	0.816641	CS pos: 21-22. RTF-SA. Pr: 0.5398
LEG_mgen_ACAT_NODE_362_length_26914_cov_65.016986_-_ORF_17__frame_3__translation	mTP	0.181993	0.002807	0.815200	CS pos: 12-13. RTF-SN. Pr: 0.2084
LEG_mgen_ACAT_NODE_3195_length_4410_cov_37.295821_-_ORF_1__frame_3__translation	mTP	0.094617	0.004563	0.900820	CS pos: 19-20. IVN-GK. Pr: 0.2772
LEG_mgen_ACO_NODE_178_length_35019_cov_33.063711_-_ORF_16__frame_3__-_ORF_16__frame_3__translation	OTHER	0.575526	0.003047	0.421428
LEG_mgen_ACTE_NODE_236_length_31873_cov_75.083570_-_ORF_13__frame_3__translation	OTHER	0.997113	0.000718	0.002169
LEG_mgen_AK_NODE_77_length_45294_cov_32.430624_-_ORF_11__frame_3__translation	OTHER	0.553732	0.283238	0.163030
LEG_mgen_ALDH_NODE_1285_length_11878_cov_31.064760_-_ORF_1__frame_1__translation	mTP	0.284905	0.000194	0.714901	CS pos: 19-20. RNF-SA. Pr: 0.4083
LEG_mgen_ALT_NODE_706_length_18828_cov_30.452168_extraction_-_ORF_1__frame_1__translation	mTP	0.436266	0.000284	0.563450	CS pos: 22-23. RTF-SQ. Pr: 0.5972
LEG_mgen_ALT_NODE_706_length_18828_cov_30.452168_extraction_-_ORF_2__frame_1__translation	OTHER	0.999805	0.000158	0.000037
LEG_mgen_ASCT_part_NODE_276_length_30293_cov_79.957701_extraction_-_ORF_1__frame_1__translation	OTHER	0.820880	0.112357	0.066762
LEG_mgen_ASCT_part_NODE_276_length_30293_cov_79.957701_extraction_-_ORF_2__frame_2__translation	OTHER	0.954190	0.030842	0.014968
LEG_mgen_ASCT_part_NODE_1268_length_12016_cov_26.709816_extraction_-_ORF_1__frame_1__translation	OTHER	0.619732	0.003946	0.376323
LEG_mgen_ASCT_part_NODE_1268_length_12016_cov_26.709816_extraction_-_ORF_2__frame_2__translation	OTHER	0.978326	0.019381	0.002293
LEG_mgen_AST_NODE_1652_length_9363_cov_23.758553_-_ORF_5__frame_1__translation	mTP	0.048799	0.000895	0.950307	CS pos: 21-22. KSF-SS. Pr: 0.3156
LEG_mgen_ATM1_NODE_1346_length_11345_cov_19.851132_-_ORF_4__frame_2__translation	OTHER	0.957640	0.027368	0.014992
LEG_mgen_ATM1_NODE_1346_length_11345_cov_19.851132_-_ORF_5__frame_3__translation	OTHER	0.648078	0.000579	0.351343
LEG_mgen_CBS_NODE_2354_length_6328_cov_30.804225_-_ORF_5__frame_3__translation	OTHER	0.994996	0.001902	0.003102
LEG_mgen_DnaJ_Jac1-like_NODE_380_length_26263_cov_124.426347_-_ORF_10__frame_1__translation	OTHER	0.999597	0.000122	0.000280
LEG_mgen_DnaJ_Jac1-like_NODE_2221_length_6779_cov_30.249248_-_ORF_2__frame_1__translation	OTHER	0.999603	0.000099	0.000297
LEG_mgen_DnaJ_NODE_1992_length_7566_cov_32.690415_-_ORF_1__frame_2__translation	OTHER	0.979559	0.000225	0.020216
LEG_mgen_DnaK_NODE_507_length_22865_cov_90.453206_-_ORF_9__frame_1__translation	OTHER	0.999045	0.000820	0.000134
LEG_mgen_DnaK_NODE_3123_length_4534_cov_2.849104_-_ORF_1__frame_1__translation	OTHER	0.920942	0.000236	0.078823
LEG_mgen_ECH_NODE_1044_length_14145_cov_17.285276_-_ORF_4__frame_2__translation	OTHER	0.999818	0.000052	0.000130
LEG_mgen_ENO_cyto_NODE_322_length_28388_cov_48.358338_-_ORF_2__frame_1__translation	OTHER	0.998178	0.001540	0.000282
LEG_mgen_ENO_cyto_NODE_919_length_15487_cov_46.752214_-_ORF_1__frame_1__translation	OTHER	0.999682	0.000183	0.000135
LEG_mgen_ENO_NODE_65_length_47509_cov_73.692774_-_ORF_16__frame_1__translation	mTP	0.101071	0.003310	0.895619	CS pos: 22-23. SFF-SS. Pr: 0.6427
LEG_mgen_ENO_NODE_4411_length_3023_cov_6.426796_-_ORF_1__frame_1__translation	mTP	0.072985	0.005322	0.921693	CS pos: 22-23. SFF-SS. Pr: 0.6309
LEG_mgen_FD_NODE_171_length_35524_cov_58.425290_-_ORF_9__frame_2__translation	OTHER	0.955955	0.000852	0.043192
LEG_mgen_FUM_NODE_4906_length_2645_cov_37.088959_-_ORF_1__frame_1__translation	OTHER	0.998972	0.000510	0.000517
LEG_mgen_GCSH_NODE_1529_length_10084_cov_26.315356_-_ORF_1__frame_1__translation	mTP	0.121707	0.000064	0.878229	CS pos: 24-25. RSF-TM. Pr: 0.4782
LEG_mgen_GCSL_part_NODE_861_length_16265_cov_15.432643_-_ORF_1__frame_1__translation	OTHER	0.998128	0.000182	0.001690
LEG_mgen_GCSL_part_NODE_861_length_16265_cov_15.432643_-_ORF_2__frame_1__translation	OTHER	0.877880	0.002190	0.119930
LEG_mgen_GCSL_part_NODE_1327_length_11492_cov_107.834228_-_ORF_9__frame_2__translation	OTHER	0.999373	0.000050	0.000577
LEG_mgen_GCSL_part_NODE_1327_length_11492_cov_107.834228_-_ORF_10__frame_2__translation	OTHER	0.998463	0.000746	0.000791
LEG_mgen_GCST_NODE_1097_length_13586_cov_46.319860_-_ORF_7__frame_2__translation	OTHER	0.997496	0.000595	0.001909
LEG_mgen_GcvP_NODE_1656_length_9317_cov_43.516322_-_ORF_1__frame_3__translation	OTHER	0.999525	0.000165	0.000310
LEG_mgen_GcvP_NODE_2333_length_6403_cov_20.343372_-_ORF_2__frame_2__translation	OTHER	0.999503	0.000320	0.000178
LEG_mgen_GcvP_NODE_5912_length_2148_cov_43.868382_-_ORF_1__frame_2__translation	OTHER	0.999379	0.000245	0.000377
LEG_mgen_GDH_part_NODE_479_length_23493_cov_80.817898_-_ORF_9__frame_1__translation	SP	0.349639	0.570840	0.079522	CS pos: 25-26. GGA-KG. Pr: 0.3574
LEG_mgen_GrpE_NODE_3631_length_3825_cov_26.270957_-_ORF_1__frame_1__translation	OTHER	0.584262	0.000040	0.415697
LEG_mgen_Grx5_NODE_1171_length_12773_cov_25.783093_-_ORF_7__frame_2__translation	OTHER	0.597982	0.207894	0.194124
LEG_mgen_HIBADH_NODE_1228_length_12335_cov_24.135403_-_ORF_4__frame_2__translation	mTP	0.365868	0.001922	0.632210	CS pos: 29-30. SRH-LV. Pr: 0.1492
LEG_mgen_HIBADH_NODE_1523_length_10122_cov_156.550775_-_ORF_6__frame_2__translation	OTHER	0.584876	0.005291	0.409833
LEG_mgen_Hsp10_NODE_594_length_20920_cov_73.855865_-_BLAST_Hit_translation	OTHER	0.528898	0.000983	0.470119
LEG_mgen_HSP60_part_NODE_112_length_39695_cov_53.418116_-_ORF_24__frame_2__translation	mTP	0.083949	0.000668	0.915383	CS pos: 35-36. RFF-SE. Pr: 0.5675
LEG_mgen_HSP60_part_NODE_112_length_39695_cov_53.418116_-_ORF_30__frame_3__translation	OTHER	0.999427	0.000456	0.000117
LEG_mgen_HSP60_part_NODE_286_length_29807_cov_20.664724_-_ORF_22__frame_3__translation	OTHER	0.999725	0.000115	0.000160
LEG_mgen_HSP60_part_NODE_286_length_29807_cov_20.664724_extraction_-_ORF_2__frame_1__translation	mTP	0.094524	0.001366	0.904110	CS pos: 27-28. MNF-SG. Pr: 0.4452
LEG_mgen_HSP60_part_NODE_1174_length_12742_cov_78.553151_-_ORF_2__frame_1__translation	OTHER	0.999770	0.000112	0.000117
LEG_mgen_HSP60_part_NODE_1174_length_12742_cov_78.553151_-_ORF_5__frame_3__translation	mTP	0.178239	0.005020	0.816741	CS pos: 26-27. MNF-SG. Pr: 0.4651
LEG_mgen_Hsp90_NODE_455_length_24104_cov_45.354298_-_ORF_19__frame_3__translation	OTHER	0.999866	0.000122	0.000012
LEG_mgen_Hsp90_NODE_1028_length_14343_cov_20.335186_-_ORF_3__frame_3__translation	OTHER	0.999940	0.000053	0.000007
LEG_mgen_Hsp90_NODE_2073_length_7221_cov_4.986186_-_ORF_4__frame_1__translation	OTHER	0.999864	0.000124	0.000012
LEG_mgen_IBD_NODE_69_length_47303_cov_60.392509_-_ORF_26__frame_3__translation	OTHER	0.964817	0.004581	0.030602
LEG_mgen_IscS_2_NODE_108_length_39859_cov_13.047569_-_ORF_22__frame_2__translation	OTHER	0.998990	0.000031	0.000979
LEG_mgen_IscS_NODE_108_length_39859_cov_13.047569_-_ORF_21__frame_2__translation	mTP	0.172192	0.001369	0.826439	CS pos: 24-25. FKF-SS. Pr: 0.3662
LEG_mgen_IscU_NODE_161_length_35944_cov_36.994249_-_BLAST_Hit_translation	mTP	0.123974	0.000119	0.875907	CS pos: 22-23. KLY-HS. Pr: 0.5062
LEG_mgen_MDH_NODE_185_length_34566_cov_106.436162_-_ORF_15__frame_3__translation	OTHER	0.999903	0.000053	0.000044
LEG_mgen_MDH_NODE_525_length_22411_cov_28.219036_-_ORF_6__frame_2__translation	OTHER	0.999647	0.000316	0.000037
LEG_mgen_ME_NODE_1297_length_11783_cov_21.987989_-_ORF_5__frame_3__translation	OTHER	0.999898	0.000094	0.000007
LEG_mgen_MMC_NODE_195_length_33929_cov_32.090498_-_ORF_18__frame_1__translation	OTHER	0.997587	0.000583	0.001831
LEG_mgen_MMC_NODE_473_length_23674_cov_52.060347_-_ORF_5__frame_2__translation	OTHER	0.958492	0.007079	0.034430
LEG_mgen_MMC_NODE_2192_length_6848_cov_61.480881_-_ORF_1__frame_1__translation	OTHER	0.979175	0.014680	0.006145
LEG_mgen_MMC_NODE_2584_length_5622_cov_30.987625_-_ORF_3__frame_3__translation	OTHER	0.906999	0.089808	0.003192
LEG_mgen_MMSDH_NODE_410_length_25549_cov_96.807922_-_BLAST_Hit_translation	mTP	0.007149	0.000041	0.992810	CS pos: 25-26. ARF-SS. Pr: 0.8964
LEG_mgen_MMSDH_part_NODE_410_length_25549_cov_96.807922_-_ORF_1__frame_1__translation	OTHER	0.994472	0.005054	0.000474
LEG_mgen_MMSDH_part_NODE_410_length_25549_cov_96.807922_-_ORF_4__frame_3__translation	OTHER	0.999837	0.000141	0.000021
LEG_mgen_MPPa_NODE_1480_length_10413_cov_23.718452_-_ORF_3__frame_1__translation	OTHER	0.998427	0.000315	0.001258
LEG_mgen_MPPb_NODE_2682_length_5403_cov_33.628127_-_ORF_2__frame_1__translation	OTHER	0.972595	0.010280	0.017126
LEG_mgen_NODE_595_length_20813_cov_33.364788_-_ORF_14__frame_2__translation	OTHER	0.997824	0.000587	0.001589
LEG_mgen_OGDH_E1_NODE_31_length_55051_cov_38.129725_-_ORF_7__frame_3__translation	OTHER	0.664796	0.000227	0.334977
LEG_mgen_OGDH_E2_NODE_1519_length_10147_cov_24.030040_-_ORF_3__frame_1__-_ORF_3__frame_1__translation	OTHER	0.999974	0.000001	0.000025
LEG_mgen_P5CDH_NODE_1525_length_10101_cov_46.353519_-_ORF_1__frame_1__translation	OTHER	0.751293	0.000841	0.247866
LEG_mgen_PDH_E1a_NODE_43_length_51874_cov_79.164261_-_ORF_20__frame_2__translation	OTHER	0.999493	0.000485	0.000023
LEG_mgen_PDH_E1b_NODE_45_length_51609_cov_23.329125_-_ORF_32__frame_3__translation	OTHER	0.999756	0.000178	0.000066
LEG_mgen_PDH_E1b_NODE_1450_length_10640_cov_25.243032_-_ORF_7__frame_3__translation	OTHER	0.938147	0.032063	0.029790
LEG_mgen_PDH_E2_NODE_1519_length_10147_cov_24.030040_-_ORF_3__frame_1__translation	OTHER	0.999974	0.000001	0.000025
LEG_mgen_PDH_E3_part_NODE_1327_length_11492_cov_107.834228_-_ORF_9__frame_2__translation	OTHER	0.999373	0.000050	0.000577
LEG_mgen_PDH_E3_part_NODE_1327_length_11492_cov_107.834228_-_ORF_10__frame_2__translation	OTHER	0.998463	0.000746	0.000791
LEG_mgen_PEPCK_NODE_237_length_31860_cov_85.227965_-_ORF_3__frame_3__translation	OTHER	0.789281	0.189247	0.021472
LEG_mgen_PEPCK_NODE_2609_length_5574_cov_48.547274_-_ORF_5__frame_2__translation	mTP	0.242319	0.001312	0.756369	CS pos: 21-22. MCF-SS. Pr: 0.2109
LEG_mgen_PGM_NODE_515_length_22731_cov_61.098611_-_ORF_9__frame_3__translation	OTHER	0.999743	0.000162	0.000096
LEG_mgen_PGM_NODE_1128_length_13263_cov_30.527406_-_ORF_5__frame_1__translation	OTHER	0.999912	0.000037	0.000051
LEG_mgen_PGM_NODE_1211_length_12457_cov_37.998459_-_ORF_7__frame_3__translation	OTHER	0.509449	0.037688	0.452863
LEG_mgen_PGM_NODE_1470_length_10501_cov_32.028533_-_ORF_4__frame_3__translation	mTP	0.278847	0.003168	0.717985	CS pos: 26-27. VRH-GE. Pr: 0.2706
LEG_mgen_PhoE-like_NODE_173_length_35505_cov_53.301148_-_ORF_19__frame_2__translation	OTHER	0.847532	0.030243	0.122226
LEG_mgen_PhoE-like_NODE_1043_length_14157_cov_64.104847_-_ORF_9__frame_3__translation	OTHER	0.851891	0.045892	0.102217
LEG_mgen_PRDH_NODE_393_length_25950_cov_52.985981_-_ORF_16__frame_2__translation	OTHER	0.624049	0.041618	0.334333
LEG_mgen_PRX_NODE_30_length_57405_cov_65.237456_-_ORF_3__frame_1__translation	OTHER	0.999868	0.000131	0.000001
LEG_mgen_SCSa_NODE_274_length_30393_cov_26.575861_-_ORF_5__frame_1__translation	mTP	0.375957	0.015887	0.608156	CS pos: 13-14. FMF-SS. Pr: 0.6635
LEG_mgen_SCSa_NODE_1097_length_13586_cov_46.319860_-_ORF_8__frame_3__translation	mTP	0.116256	0.015291	0.868453	CS pos: 19-20. MMF-SS. Pr: 0.7126
LEG_mgen_SCSa_NODE_4725_length_2769_cov_26.689629_-_ORF_1__frame_3__translation	mTP	0.222297	0.015949	0.761754	CS pos: 19-20. MMF-AS. Pr: 0.7599
LEG_mgen_SCSb_NODE_55_length_49034_cov_58.625902_-_ORF_5__frame_2__translation	mTP	0.300933	0.006838	0.692230	CS pos: 9-10. LRF-GA. Pr: 0.1456
LEG_mgen_SCSb_NODE_543_length_22092_cov_90.334305_-_ORF_1__frame_1__translation	mTP	0.293624	0.007638	0.698738	CS pos: 9-10. LRF-GA. Pr: 0.1723
LEG_mgen_SCSb_NODE_3492_length_3991_cov_15.695652_-_ORF_1__frame_3__translation	mTP	0.251018	0.006668	0.742314	CS pos: 15-16. MGF-AN. Pr: 0.3872
LEG_mgen_SDHa_NODE_3787_length_3611_cov_7.977038_-_ORF_1__frame_2__translation	mTP	0.033902	0.000008	0.966091	CS pos: 27-28. RYF-ST. Pr: 0.6460
LEG_mgen_SDR_llike_NODE_312_length_28720_cov_31.279719_-_ORF_11__frame_2__translation	OTHER	0.763715	0.000714	0.235570
LEG_mgen_SLC25_NODE_30_length_57405_cov_65.237456_-_ORF_24__frame_2__translation	OTHER	0.957989	0.001249	0.040762
LEG_mgen_SLC25_NODE_1486_length_10356_cov_40.212533_-_ORF_7__frame_3__translation	OTHER	0.997751	0.000159	0.002090
LEG_mgen_SLC25_NODE_2107_length_7113_cov_36.517320_-_ORF_2__frame_2__translation	OTHER	0.990475	0.001670	0.007855
LEG_mgen_SOD_NODE_418_length_25279_cov_52.522384_-_ORF_14__frame_1__translation	OTHER	0.999872	0.000024	0.000104
LEG_mgen_SOD_NODE_510_length_22814_cov_23.352449_-_ORF_5__frame_2__translation	OTHER	0.897474	0.009190	0.093336
LEG_mgen_unknown_protein_NODE_2661_length_5442_cov_49.087865_-_ORF_2__frame_1__translation	OTHER	0.997570	0.000064	0.002366
LEG_mgen_YMC_NODE_131_length_37631_cov_105.652597_-_ORF_16__frame_1__translation	OTHER	0.998543	0.000201	0.001256
LEG_mgen_YMC_NODE_853_length_16423_cov_20.564556_-_ORF_9__frame_2__translation	OTHER	0.999307	0.000238	0.000455
LEG_mgen_YMC_NODE_1121_length_13360_cov_65.188468_-_ORF_6__frame_2__translation	OTHER	0.999962	0.000022	0.000016
LEG_MMC_NODE_2741_length_1438_cov_2.306960_g2041_i0_-_ORF_1__frame_2__translation	OTHER	0.998896	0.000252	0.000853
LEG_MMC_NODE_4913_length_1034_cov_2.605619_g4088_i0_-_ORF_1__frame_1__translation	OTHER	0.999096	0.000564	0.000341
LEG_MMC_NODE_6448_length_875_cov_5.821696_g5547_i0_-_ORF_1__frame_2__translation	OTHER	0.999739	0.000096	0.000166
LEG_MMC_NODE_6469_length_873_cov_14.866250_g5567_i0_-_ORF_1__frame_1__translation	OTHER	0.974512	0.001839	0.023650
LEG_MMSDH_NODE_2163_length_1653_cov_13.353165_g1536_i0_-_ORF_1__frame_3__translation	mTP	0.007220	0.000029	0.992751	CS pos: 26-27. ARF-SS. Pr: 0.9024
LEG_MPPb_NODE_7629_length_782_cov_2.427362_g6688_i0_-_ORF_1__frame_2__translation	OTHER	0.999868	0.000105	0.000027
LEG_OGDH_E2_NODE_2254_length_1611_cov_6.205462_g1617_i0_-_ORF_2__frame_2__translation	mTP	0.161242	0.000251	0.838508	CS pos: 72-73. FYF-AS. Pr: 0.3001
LEG_P5CDH_NODE_2059_length_1707_cov_20.753366_g1438_i0_-_ORF_1__frame_3__translation	OTHER	0.659416	0.044929	0.295655
LEG_PDH_E1a_NODE_4576_length_1080_cov_2.045680_g3769_i0_-_ORF_1__frame_3__translation	OTHER	0.950525	0.008591	0.040884
LEG_PDH_E1b_NODE_13400_length_508_cov_2.894253_g12291_i0_-_ORF_1__frame_2__translation	OTHER	0.999826	0.000098	0.000075
LEG_PDH_E2_NODE_2254_length_1611_cov_6.205462_g1617_i0_-_ORF_2__frame_2__translation	mTP	0.161242	0.000251	0.838508	CS pos: 72-73. FYF-AS. Pr: 0.3001
LEG_PDH_E3_NODE_2905_length_1387_cov_3.812024_g2192_i0_-_ORF_1__frame_3__translation	OTHER	0.989990	0.000588	0.009422
LEG_PEPCK_NODE_1659_length_1973_cov_27.742105_g1098_i0_-_ORF_1__frame_2__translation	OTHER	0.520987	0.000273	0.478740
LEG_PGM_NODE_6632_length_859_cov_10.136132_g5725_i0_-_ORF_1__frame_1__translation	OTHER	0.602742	0.001670	0.395588
LEG_PGM_NODE_7126_length_816_cov_2.247645_g6200_i0_-_ORF_1__frame_1__translation	OTHER	0.999201	0.000274	0.000525
LEG_PGM_NODE_7361_length_799_cov_3.917355_g6428_i0_-_ORF_1__frame_2__translation	OTHER	0.998607	0.000243	0.001150
LEG_PGM_NODE_10915_length_601_cov_6.712121_g9818_i0_-_ORF_1__frame_3__translation	OTHER	0.987095	0.002605	0.010301
LEG_PhoE-like_NODE_6449_length_875_cov_3.465087_g5548_i0_-_ORF_1__frame_2__translation	OTHER	0.863262	0.064598	0.072141
LEG_PhoE-like_NODE_7080_length_819_cov_4.816354_g6156_i0_-_ORF_1__frame_2__translation	OTHER	0.999218	0.000076	0.000706
LEG_PRDH_NODE_5966_length_916_cov_5.440095_g5085_i0_-_ORF_1__frame_1__translation	OTHER	0.999174	0.000140	0.000686
LEG_PRX_NODE_7183_length_811_cov_11.707317_g6254_i0_-_ORF_1__frame_3__translation	OTHER	0.999868	0.000131	0.000001
LEG_SCSa_NODE_4242_length_1125_cov_7.781369_g3451_i0_-_ORF_2__frame_1__translation	mTP	0.116256	0.015291	0.868453	CS pos: 19-20. MMF-SS. Pr: 0.7126
LEG_SCSa_NODE_4722_length_1059_cov_11.561866_g3907_i0_-_ORF_2__frame_1__translation	mTP	0.222297	0.015949	0.761754	CS pos: 19-20. MMF-AS. Pr: 0.7599
LEG_SCSa_NODE_5473_length_969_cov_7.498884_g4618_i0_-_ORF_1__frame_2__translation	OTHER	0.942470	0.006262	0.051268
LEG_SCSb_NODE_2248_length_1615_cov_5.557069_g1613_i0_-_ORF_2__frame_1__translation	OTHER	0.716398	0.004935	0.278668
LEG_SCSb_NODE_4329_length_1113_cov_3.748077_g3534_i0_-_ORF_1__frame_2__translation	OTHER	0.984087	0.001036	0.014878
LEG_SDR_like_NODE_5587_length_957_cov_1.322398_g4726_i0_-_ORF_1__frame_1__translation	mTP	0.347709	0.000123	0.652168	CS pos: 17-18. TFL-NK. Pr: 0.1832
LEG_SLC25_NODE_3918_length_1177_cov_5.454710_g3149_i0_-_ORF_1__frame_2__translation	OTHER	0.999813	0.000018	0.000169
LEG_SLC25_NODE_5413_length_976_cov_3.466224_g4561_i0_-_ORF_1__frame_2__translation	OTHER	0.996577	0.000121	0.003302
LEG_SLC25_NODE_6213_length_895_cov_2.989051_g5319_i0_-_ORF_1__frame_1__translation	OTHER	0.986307	0.001669	0.012024
LEG_SOD_NODE_8127_length_745_cov_3.154762_g7167_i0_-_ORF_1__frame_3__translation	OTHER	0.999871	0.000024	0.000105
LEG_SOD_NODE_10140_length_636_cov_3.648313_g9054_i0_-_ORF_1__frame_2__translation	OTHER	0.999750	0.000094	0.000156
LEG_TPI_NODE_6160_length_900_cov_8.157195_g5269_i0_-_ORF_1__frame_1__translation	OTHER	0.999935	0.000054	0.000011
LEG_TPI_NODE_6502_length_870_cov_8.818068_g5600_i0_-_ORF_1__frame_2__translation	OTHER	0.963939	0.000488	0.035573
LEG_TPI_NODE_7243_length_807_cov_5.935967_g6313_i0_-_ORF_1__frame_3__translation	OTHER	0.986752	0.000468	0.012779
LEG_unknown_protein_NODE_8069_length_749_cov_2.137574_g7109_i0_-_ORF_1__frame_3__translation	OTHER	0.992422	0.000211	0.007367
LEG_YMC_NODE_6385_length_881_cov_2.500000_g5485_i0_-_ORF_1__frame_2__translation	OTHER	0.971958	0.002233	0.025809
LEG_YMC_NODE_8751_length_709_cov_2.073899_g7720_i0_-_ORF_1__frame_1__translation	OTHER	0.697914	0.028950	0.273136
LEG_YMC_NODE_9080_length_690_cov_4.118314_g8024_i0_-_ORF_1__frame_1__translation	OTHER	0.562478	0.157442	0.280080
SIVAB_2OGMC_NODE_8991_length_1017_cov_11.353933_g8044_i0_-_ORF_1__frame_1__translation	OTHER	0.707590	0.218356	0.074054
SIVAB_2OGMC_NODE_9604_length_965_cov_16.159905_g8606_i0_-_ORF_1__frame_2__translation	OTHER	0.813084	0.170627	0.016289
SIVAB_2OGMC_NODE_18160_length_510_cov_5.485640_g16819_i0_-_ORF_1__frame_1__translation	OTHER	0.933013	0.035066	0.031922
SIVAB_AAC_NODE_11027_length_857_cov_22.538356_g9944_i0_-_ORF_1__frame_1__translation	OTHER	0.992021	0.006960	0.001019
SIVAB_AADH_NODE_4952_length_1469_cov_1.046200_g4354_i0_-_ORF_1__frame_1__translation	mTP	0.286934	0.032611	0.680455	CS pos: 20-21. FGF-AT. Pr: 0.3819
SIVAB_AAT_NODE_694_length_3165_cov_3.864384_g570_i0_-_ORF_2__frame_3__translation	OTHER	0.633143	0.004594	0.362263
SIVAB_AAT_NODE_912_length_2900_cov_2.866571_g570_i1_-_ORF_1__frame_2__translation	OTHER	0.999143	0.000240	0.000617
SIVAB_ACAT_NODE_525_length_3439_cov_6.882246_g417_i0_-_ORF_2__frame_3__translation	OTHER	0.958858	0.000641	0.040501
SIVAB_ACO_NODE_5633_length_1376_cov_0.669335_g4978_i0_extraction_-_ORF_2__frame_2__translation	SP	0.491142	0.508192	0.000665	CS pos: 38-39. ALA-GH. Pr: 0.8198
SIVAB_ACTE_NODE_21141_length_428_cov_0.694352_g19741_i0_translation	OTHER	0.999280	0.000217	0.000502
SIVAB_AK_NODE_19673_length_464_cov_10.540059_g18303_i0_-_ORF_1__frame_1__translation	OTHER	0.556569	0.194526	0.248905
SIVAB_ALDH_NODE_4161_length_1602_cov_7.536271_g3632_i0_-_ORF_1__frame_2__translation	mTP	0.436333	0.015463	0.548204	CS pos: 17-18. KAF-ST. Pr: 0.5718
SIVAB_ALDH_NODE_4434_length_1550_cov_1.234013_g3880_i0_-_ORF_1__frame_3__translation	OTHER	0.641745	0.001376	0.356878
SIVAB_ALT_NODE_1540_length_2402_cov_10.294945_g1305_i0_-_ORF_1__frame_3__translation	OTHER	0.998502	0.000454	0.001044
SIVAB_ASCT_NODE_4606_length_1522_cov_2.020789_g4038_i0_-_ORF_1__frame_3__translation	mTP	0.410356	0.035438	0.554205	CS pos: 23-24. FRS-AV. Pr: 0.3195
SIVAB_ASCT_NODE_6139_length_1312_cov_10.230380_g5432_i0_-_ORF_1__frame_1__translation	OTHER	0.990425	0.002406	0.007169
SIVAB_AST_NODE_8593_length_1052_cov_4.808649_g7682_i0_-_ORF_1__frame_2__translation	mTP	0.010512	0.000015	0.989472	CS pos: 25-26. CLF-SH. Pr: 0.7205
SIVAB_ATM1_NODE_2559_length_1985_cov_1.922497_g2207_i0_-_ORF_1__frame_2__translation	mTP	0.178001	0.000049	0.821950	CS pos: 29-30. LQL-AK. Pr: 0.1693
SIVAB_ATM1_NODE_2559_length_1985_cov_1.922497_g2207_i0_-_ORF_2__frame_3__translation	OTHER	0.999887	0.000051	0.000062
SIVAB_CBS_NODE_4805_length_1492_cov_8.613919_g4227_i0_-_ORF_1__frame_2__translation	OTHER	0.999965	0.000018	0.000017
SIVAB_DnaJ_Jac1-like_NODE_6504_length_1269_cov_22.779335_g5756_i0_-_ORF_1__frame_1__translation	OTHER	0.999101	0.000074	0.000825
SIVAB_DnaJ_Jac1-like_NODE_7422_length_1166_cov_14.942252_g6591_i0_-_ORF_1__frame_2__translation	OTHER	0.989285	0.003467	0.007249
SIVAB_DnaK_NODE_2329_length_2060_cov_432.737713_g2007_i0_-_ORF_2__frame_3__translation	OTHER	0.976404	0.000209	0.023387
SIVAB_DnaK_NODE_2336_length_2059_cov_432.861284_g2007_i1_-_ORF_2__frame_2__translation	OTHER	0.976404	0.000209	0.023387
SIVAB_DnaK_NODE_2341_length_2058_cov_433.045054_g2007_i2_-_ORF_1__frame_1__translation	OTHER	0.976404	0.000209	0.023387
SIVAB_DnaK_NODE_2414_length_2033_cov_438.768625_g2007_i3_-_ORF_1__frame_3__translation	OTHER	0.976404	0.000209	0.023387
SIVAB_DnaK_NODE_5286_length_1424_cov_226.259830_g2007_i4_-_ORF_1__frame_3__translation	OTHER	0.999978	0.000005	0.000016
SIVAB_E1_NODE_2830_length_1902_cov_1.291268_g2444_i0_-_ORF_2__frame_3__translation	OTHER	0.995403	0.000480	0.004117
SIVAB_E2_NODE_5092_length_1449_cov_2.684569_g4475_i0_-_ORF_1__frame_1__translation	mTP	0.300199	0.005543	0.694257	CS pos: 33-34. APF-SV. Pr: 0.1730
SIVAB_ECH_NODE_7452_length_1162_cov_2.289855_g6619_i0_-_ORF_1__frame_3__translation	OTHER	0.999641	0.000227	0.000132
SIVAB_ENO_NODE_577_length_3346_cov_40.236409_g465_i0_-_ORF_1__frame_2__translation	OTHER	0.998807	0.000301	0.000892
SIVAB_ENO_NODE_1091_length_2727_cov_18.426154_g911_i0_-_ORF_1__frame_1__translation	OTHER	0.999581	0.000322	0.000097
SIVAB_ENO_NODE_5222_length_1431_cov_4.210890_g4597_i0_-_ORF_2__frame_2__translation	OTHER	0.967176	0.000752	0.032072
SIVAB_FUM_NODE_1942_length_2209_cov_9.361671_g1659_i0_-_ORF_1__frame_3__translation	OTHER	0.999990	0.000005	0.000005
SIVAB_GCSH_part_NODE_16695_length_560_cov_4.147806_g15389_i0_translation_frame_1_reverse	OTHER	0.996002	0.000227	0.003771
SIVAB_GCSL_part_NODE_2488_length_2009_cov_21.958023_g2081_i1_-_ORF_1__frame_3__translation	OTHER	0.999083	0.000063	0.000853
SIVAB_GCSL_part_NODE_4745_length_1500_cov_0.693372_g4170_i0_-_ORF_1__frame_2__translation	OTHER	0.605105	0.001962	0.392934
SIVAB_GCSL_part_NODE_4745_length_1500_cov_0.693372_g4170_i0_-_ORF_2__frame_3__translation	OTHER	0.995673	0.000886	0.003441
SIVAB_GCST_NODE_7246_length_1185_cov_3.310964_g6427_i0_-_ORF_1__frame_2__translation	OTHER	0.884928	0.000096	0.114976
SIVAB_GcvP_NODE_710_length_3142_cov_13.304809_g585_i0_-_ORF_1__frame_2__translation	OTHER	0.901080	0.000097	0.098823
SIVAB_GcvP_NODE_1733_length_2306_cov_17.332263_g585_i1_-_ORF_1__frame_2__translation	OTHER	0.901080	0.000097	0.098823
SIVAB_GDH_NODE_4952_length_1469_cov_1.046200_g4354_i0_-_ORF_1__frame_1__translation	mTP	0.286934	0.032611	0.680455	CS pos: 20-21. FGF-AT. Pr: 0.3819
SIVAB_GrpE_NODE_13841_length_686_cov_6.119857_g12628_i0_-_ORF_1__frame_2__translation	OTHER	0.999957	0.000001	0.000042
SIVAB_HIBADH_NODE_386_length_3744_cov_12.737075_g298_i0_-_ORF_2__frame_2__translation	OTHER	0.966194	0.004962	0.028844
SIVAB_Hsp10_NODE_19711_length_463_cov_15.919643_g18341_i0_-_BLAST_Hit_translation	mTP	0.195515	0.000647	0.803838	CS pos: 12-13. RCL-IQ. Pr: 0.2019
SIVAB_HSP60_NODE_3692_length_1691_cov_14.577366_g3208_i0_-_ORF_1__frame_1__translation	OTHER	0.999786	0.000110	0.000104
SIVAB_HSP60_NODE_4260_length_1584_cov_19.741935_g3723_i0_-_ORF_1__frame_1__translation	OTHER	0.999855	0.000091	0.000054
SIVAB_HSP60_NODE_4261_length_1584_cov_17.749485_g3723_i1_translation	OTHER	0.999911	0.000060	0.000029
SIVAB_HSP60_NODE_4760_length_1497_cov_33.027737_g4184_i0_-_ORF_1__frame_1__translation	OTHER	0.973242	0.000841	0.025917
SIVAB_HSP60_NODE_18719_length_491_cov_11.288462_g17371_i0_-_ORF_1__frame_2__translation	OTHER	0.999285	0.000379	0.000336
SIVAB_Hsp90_NODE_1787_length_2278_cov_84.721990_g1517_i0_-_ORF_1__frame_3__translation	OTHER	0.999914	0.000080	0.000007
SIVAB_IscS_2_NODE_5386_length_1410_cov_0.915822_g4749_i0_-_ORF_2__frame_2__translation	OTHER	0.991288	0.000194	0.008518
SIVAB_IscS_NODE_5386_length_1410_cov_0.915822_g4749_i0_-_ORF_1__frame_1__translation	OTHER	0.981921	0.000227	0.017851
SIVAB_IscU_NODE_707_length_3146_cov_2.038092_g582_i0_-_ORF_3__frame_2__translation	OTHER	0.794354	0.187234	0.018412
SIVAB_MDH_NODE_7705_length_1139_cov_19.993083_g6859_i0_-_ORF_1__frame_2__translation	mTP	0.192325	0.007398	0.800277	CS pos: 21-22. NFW-KT. Pr: 0.3946
SIVAB_MDH_NODE_9327_length_988_cov_25.130081_g8352_i0_-_ORF_1__frame_3__translation	mTP	0.213302	0.009407	0.777291	CS pos: 21-22. NFW-KT. Pr: 0.3555
SIVAB_ME_NODE_1335_length_2525_cov_89.812344_g1130_i0_-_ORF_1__frame_3__translation	OTHER	0.983059	0.016740	0.000201
SIVAB_ME_NODE_1471_length_2444_cov_92.939577_g1130_i1_-_ORF_1__frame_3__translation	OTHER	0.979581	0.019430	0.000989
SIVAB_ME_NODE_1563_length_2390_cov_95.159081_g1130_i2_-_ORF_1__frame_3__translation	OTHER	0.999573	0.000307	0.000120
SIVAB_MMC_NODE_5745_length_1363_cov_3.026699_g5073_i0_-_ORF_1__frame_3__translation	OTHER	0.964576	0.000130	0.035294
SIVAB_MMC_NODE_11623_length_814_cov_1.751092_g10511_i0_-_ORF_1__frame_2__translation	OTHER	0.989902	0.001113	0.008985
SIVAB_MMC_NODE_11684_length_810_cov_2.436310_g10567_i0_-_ORF_1__frame_2__translation	OTHER	0.997588	0.000943	0.001469
SIVAB_MMC_NODE_11685_length_810_cov_2.260615_g10567_i1_-_ORF_1__frame_2__translation	OTHER	0.997588	0.000943	0.001469
SIVAB_MMSDH_NODE_3851_length_1657_cov_11.724183_g3352_i0_-_ORF_1__frame_2__translation	OTHER	0.920836	0.007286	0.071878
SIVAB_MPPa_NODE_377_length_3780_cov_5.963592_g290_i0_-_ORF_2__frame_2__translation	mTP	0.427694	0.000910	0.571396	CS pos: 34-35. HRL-AA. Pr: 0.2965
SIVAB_MPPb_NODE_5295_length_1423_cov_1.989969_g4660_i0_-_ORF_1__frame_3__translation	OTHER	0.999638	0.000076	0.000286
SIVAB_P5CDH_NODE_5525_length_1390_cov_10.316706_g4883_i0_-_ORF_1__frame_1__translation	OTHER	0.999766	0.000035	0.000198
SIVAB_P5CDH_NODE_7959_length_1114_cov_27.061803_g7087_i0_-_ORF_1__frame_1__translation	OTHER	0.989191	0.000259	0.010551
SIVAB_PDH_E1a_NODE_5399_length_1408_cov_8.437158_g4762_i0_-_ORF_1__frame_1__translation	OTHER	0.654448	0.000403	0.345149
SIVAB_PDH_E1b_NODE_4707_length_1506_cov_3.216099_g4136_i0_-_ORF_1__frame_1__translation	OTHER	0.957015	0.020592	0.022394
SIVAB_PDH_E1b_NODE_7286_length_1181_cov_4.038899_g4136_i1_-_ORF_1__frame_3__translation	OTHER	0.999896	0.000013	0.000091
SIVAB_PDH_E1b_NODE_9216_length_999_cov_3.802752_g8251_i0_-_ORF_1__frame_1__translation	OTHER	0.999283	0.000402	0.000315
SIVAB_PDH_E2_NODE_5092_length_1449_cov_2.684569_g4475_i0_-_ORF_1__frame_1__translation	mTP	0.300199	0.005543	0.694257	CS pos: 33-34. APF-SV. Pr: 0.1730
SIVAB_PDH_E3_NODE_2418_length_2032_cov_21.685039_g2081_i0_-_ORF_1__frame_3__translation	OTHER	0.999083	0.000063	0.000853
SIVAB_PDH_E3_NODE_2488_length_2009_cov_21.958023_g2081_i1_-_ORF_1__frame_3__translation	OTHER	0.999083	0.000063	0.000853
SIVAB_PEPCK_NODE_2502_length_2005_cov_162.067093_g2156_i0_-_ORF_1__frame_2__translation	OTHER	0.546565	0.010873	0.442562
SIVAB_PEPCK_NODE_2544_length_1990_cov_146.420290_g2156_i1_-_ORF_1__frame_2__translation	OTHER	0.546565	0.010873	0.442562
SIVAB_PGM_NODE_10687_length_882_cov_28.018543_g9624_i0_-_ORF_1__frame_2__translation	mTP	0.277814	0.000414	0.721772	CS pos: 25-26. VRH-GE. Pr: 0.4146
SIVAB_PGM_NODE_10822_length_872_cov_10.813423_g9750_i0_-_ORF_1__frame_3__translation	OTHER	0.999919	0.000013	0.000069
SIVAB_PhoE-like_NODE_10564_length_891_cov_3.630890_g9506_i0_-_ORF_1__frame_1__translation	OTHER	0.877052	0.000669	0.122279
SIVAB_PhoE-like_NODE_11200_length_843_cov_1.976257_g10108_i0_-_ORF_1__frame_3__translation	OTHER	0.948350	0.000256	0.051394
SIVAB_PhoE-like_NODE_11663_length_812_cov_0.713869_g10547_i0_-_ORF_1__frame_3__translation	OTHER	0.998726	0.000036	0.001238
SIVAB_PRX_NODE_1021_length_2790_cov_4.997747_g847_i0_-_ORF_1__frame_3__translation	OTHER	0.999939	0.000051	0.000010
SIVAB_PRX_NODE_17727_length_523_cov_23.664141_g16398_i0_-_ORF_1__frame_1__translation	OTHER	0.998417	0.001074	0.000509
SIVAB_SCSa_NODE_10265_length_912_cov_3.382166_g9227_i0_-_ORF_1__frame_1__translation	mTP	0.264205	0.025240	0.710556	CS pos: 21-22. RMF-SS. Pr: 0.7409
SIVAB_SCSb_NODE_1179_length_2655_cov_14.745649_g988_i0_-_ORF_1__frame_1__translation	OTHER	0.982758	0.000695	0.016547
SIVAB_SDR_like_NODE_7545_length_1154_cov_81.286271_g6708_i0_-_ORF_1__frame_3__translation	OTHER	0.957983	0.004986	0.037031
SIVAB_SLC25_NODE_1681_length_2335_cov_0.720562_g1422_i0_-_ORF_2__frame_3__translation	OTHER	0.999763	0.000028	0.000209
SIVAB_SLC25_NODE_12381_length_765_cov_0.710031_g11226_i0_-_ORF_1__frame_2__translation	OTHER	0.997380	0.000013	0.002607
SIVAB_SOD_NODE_12976_length_732_cov_1.242975_g11800_i0_-_ORF_1__frame_3__translation	OTHER	0.999808	0.000094	0.000097
SIVAB_SOD_NODE_15769_length_597_cov_6.721277_g14495_i0_-_ORF_1__frame_2__translation	OTHER	0.998158	0.000142	0.001701
SIVAB_TPI_NODE_12038_length_786_cov_47.743551_g10906_i0_-_ORF_1__frame_2__translation	OTHER	0.999918	0.000040	0.000042
SIVAB_TPI_NODE_14958_length_631_cov_19.825397_g13709_i0_-_ORF_1__frame_2__translation	OTHER	0.998276	0.000481	0.001243
SIVAB_unknown_protein_NODE_3302_length_1777_cov_1.863636_g2868_i0_-_ORF_1__frame_1__translation	OTHER	0.997120	0.000161	0.002720
SIVAB_YMC_NODE_8409_length_1069_cov_3.092357_g7510_i0_-_ORF_1__frame_2__translation	OTHER	0.997696	0.000064	0.002240
SIVAB_YMC_NODE_9430_length_980_cov_7.071512_g8449_i0_-_ORF_1__frame_1__translation	OTHER	0.998353	0.001238	0.000409
SIVAB_YMC_NODE_13930_length_681_cov_5.209386_g12713_i0_-_ORF_1__frame_2__translation	OTHER	0.994451	0.002786	0.002764
LEG_mgen_TIM17_NODE_148_length_36712_cov_57.623179_-_ORF_7__frame_2__translation	OTHER	0.999181	0.000035	0.000784
LEG_mgen_TIM50_NODE_2548_length_5695_cov_35.354885_-_ORF_2__frame_1__translation	OTHER	0.999860	0.000032	0.000108
LEG_TIM17_part_NODE_22767_length_324_cov_1.633466_g21647_i0_extraction_translation_frame_1_reverse	OTHER	0.995593	0.003229	0.001178
LEG_TIM50_NODE_6640_length_858_cov_2.542675_g5733_i0_-_ORF_1__frame_2__translation	OTHER	0.865275	0.081122	0.053603
SIVAB_TIM17_NODE_17180_length_542_cov_0.674699_g15861_i0_-_ORF_1__frame_2__translation	OTHER	0.998809	0.000014	0.001177
SIVAB_TIM50_NODE_2514_length_2002_cov_2.318400_g2166_i0_-_ORF_1__frame_2__translation	OTHER	0.699457	0.287296	0.013248

## Sheet: Specs
DeepLoc 2.1
Probability thresholds for the subcellular localizations and membrane types. A localization is predicted if its probability is above the threshold shown below:
Localization	Cytoplasm	Nucleus	Extracellular	Cell membrane	Mitochondrion	Plastid	Endoplasmic reticulum	Lysosome/Vacuole	Golgi apparatus	Peroxisome
Threshold	0.4761	0.5014	0.6173	0.5646	0.6220	0.6395	0.6090	0.5848	0.6494	0.7364
Membrane types	Peripheral	Transmembrane	Lipid anchor	Soluble
Threshold	0.60	0.51	0.82	0.50

## Sheet: Sequences
Label	AA sequence
LEG_2OGMC_NODE_4889_length_1036_cov_4.713396_g4064_i0_-_ORF_1_(frame_1)_translation	MNKPAEIRPVADQQKIPVHTQQNMALNFLLGGISGCIATLSIQPLDMIKVRIQLLSEMGQKRVNMFKVAGEIVKKDGICALYKGLDSALARQIIYGTTRLGLFYSFLDYFKRERPEPTILQKSVSSFVAGGIASIVANPADLILVRMQADGALPPAQRRNYKNVFDGIVRIIKEEGFTKLWRGCIPTIARASILNLSLLAPFEEFKVRLKNVIKDTTARTMVSSMLASLIGSLSALPFDNAKTKLQKMKPNENGVLPYCGIVDCMIKTVRTEGLFKLWVGLPTFYIRIGPHVIITLMMNDFLRSKLLKKHH
LEG_2OGMC_NODE_5262_length_992_cov_12.812840_g4417_i0_-_ORF_1_(frame_3)_translation	VRESNMNFLIGGASGMIAIAVVQPIDFLKVQIQVKSEMGVKNLNPFSIAKEIYKKTGGIRVFYKGLDSALLRQAVYTSTRLGLFYNIKDYLTKKSGKQPSMLMNTCASLFAGAVGAFVGNPADLALIRIQSDTNLPVNERRNYKNVFDALFRTMKEEGLFTLWRGSMPTVCRAMAMNFSLLVPFEETKKFLKPYVKGERARACWAAMISGICATVLSLPFDNVKTKLQKMKAGPDGKLPYKGVLDCFIKTANLEGTSKLWVGVNTYYIRVAPHAVISLVTNDILRSFFTSKTKKN
LEG_2OGMC_NODE_5815_length_932_cov_17.351572_g4941_i0_-_ORF_1_(frame_1)_translation	MNFLIGGASGMIAIAVVQPIDFLKVQIQVKSEMGVKNLNPFSIAKEIYKKTGGIRIFYKGLDSALLRQAVYTSTRLGLFYNIKDYLTKKSGKQPTMLMNTCASLFSGAVAAFVGNPADLALIRIQSDTNLPVNERRNYKNVFDALFRTMREEGLLTLWRGSMPTVCRAMAMNFSLLVPFEETKKLLKPYVKGERARACWAAMISGICATVLSLPFDNVKTKLQKMKAGPDGKLPYKGVLDCFIKTANVEGTSKLWVGVNTYYIRVAPHAVISLVTNDILRSFFTSKTKKN
LEG_AAC_NODE_4433_length_1098_cov_45.525854_g3633_i0_-_ORF_1_(frame_2)_translation	MPHQSKGSHQEGGNLTSFLIDFLAGGVSGSIAKTIAAPIERVKILLQTQQANANLKGKQYTGIFNCFTRVIKEEGVGALWRGNLSNIIRYFPTQAINFSTKDALQKYFCPYNPKTQPLQFFLGNLLSGGVAGAISLFCVYPLDFARTRLGADMGRNPAERQFRGLGDCLKKILKTDGFRGIYKGFGISVLGIFIYRSFYFGCYDTGKKIFLSEENKNVPIWQKFLFAQLVTSVSESLSYPIDTVRRRLMMQAGRKEKLYNGTLDCAVKILRKEGIRGFWKGNFSNICRGLGSSLVLVLYDEIQKVMKPKKPVEVKVMPAVVKLVEVKPVEKPKESK
LEG_AAC_NODE_6009_length_913_cov_2.578571_g5127_i0_-_ORF_1_(frame_1)_translation	QQANANLKGKHYTGIFTCFSRVIKEEGVGALWRGNLSNIIRYFPTQAINFSTKDALQKYFCPYNPKTQPLQFFVGNLLSGGIAGAISLFCVYPLDFARTRLGADMGRNPSDRQFKGLGDCLRKILKTDGFRGIYRGFGISVLGIFIYRSFYFGCYDTGKKIFFNEENKNVPIWQKFLFAQLVTSTSESLSYPIDTVRRRLMMQAGRKEKIYNGTLDCAVKISRKEGFRGFFKGNFSNICRGLGSSLVLVLYDEIQKILKPKKPVPVVVKPVEVKPVEVKPVVITKEK
LEG_AAC_NODE_6732_length_848_cov_11.069677_g5822_i0_-_ORF_1_(frame_2)_translation	MSQHFIMSPAERQKRVHKGDFLAGIIANTWSTIVMTPIQKYSFPKIAEFLKKECPIKLWQGSRYSLHRAAFIGGLNYFFKGMIGRFVLPADFSKHKLQFVLGKVLCGLFSGVVPWTFVYPMDIIRGKLLKEGKVFNCSNIKAVMHAEGLKGIYNGFAGSLYWLCGYRAVLIGCYDTINKYLWPDNSKAPTLHRYLLGQTVALGAGVIFVPLDKIRVKMQADKKAYSGVFDCANKIFEKEGICGFYMGGLHLIKLSLGTALTILFYEESRKR
LEG_AAC_NODE_7228_length_808_cov_3.068027_g6299_i0_-_ORF_1_(frame_3)_translation	VKLLLQTQHVNVQLQGREYTGIINCFTRVIKEEGVFALWRGNLSNVIRFFPSQAILFPVKDALEKYLCQYDSKEAPIKFFIGNLASGGLSGAFTDFFVYPLDFARTRIGSDMGRGLEGRQFKGIVDCLKKTIKKTGAFQIYQGFPASVMGIFIYRALYFGGYDAGKKLFFSEESTQIPFWKRYVFAQGIVAAADTLSFPFATVRRRLMMQVGRKRQLYSGTIDCGLKILKHEGITGFYKGGFANVFRSFGSSLVLVLYDEFQQILKYI
LEG_AADH_NODE_2409_length_1546_cov_13.942974_g1752_i0_-_ORF_1_(frame_2)_translation	LARALAMSKYIGEFHLKHICSLHTRRFSSHLAPKTEPNFLEMVRQYFNEAAKHIDIPKYYIDVIKNAKAVVQFNFPLVRDDGSIEVISGYRAQHSLHYLPTKGGTRYAEHIDLAETEALAALMTLKLSVHNIPYGGAKGGVKINPRLYSEKELIRLTRKYTIELAKKNFIGASIDVPGPDLGTNEMIMNTMKETYATLYGEKDINAHGCVTGKSVNQGGINGRTESTGLGVFYGLREVCNNKKLSEEHGFEQGIEGKKVIIQGLGNVGFYATKFLRKAGAKIIGVVEFNSSAYNPEGIDTEDLYQYKEKAKTLHGYPRATETYSDKQDFHTVMYKPCDILIPAAVERSLHSGNADKLNCKIVGEAANGPTTCAANEILEKKHVLVVPDLVLNAGGVTVS…
LEG_AADH_NODE_2489_length_1520_cov_13.541120_g1817_i0_-_ORF_1_(frame_2)_translation	GTGIQMLARALSMPNMIGEFHFKHLYCLASRNFSSHMAPKTEPNFLEMVRQYFNEAAKHIDIPKYYIDVIKNAKAVVQFNFPLVRDDGSIEVISGYRAQHSLHYLPTKGGTRYAEHIDLAETEALAALMTLKLSVHNIPYGGAKGGVKINPRLYSEKELIRLTRKYTIELAKKNFIGAAIDVPGPDLGTNEMIMNTMKETYATLYGEKDINAHGCVTGKSVNQGGINGRTESTGLGVFYGLREVCNNKNLSEAHGFEPGIDGKKIIIQGLGNVGFYATKFLRQAGAKIIGVVEFNSSAYNPEGIDTEDLYQYKEKTKTLHGYPRAKESFSDKEDFANVMYRPCDILIPAAIERSLHVANADKLNCKIVGEAANGPTTCAANEILEKKNILVVPDLVLNA…
LEG_AAT_NODE_2375_length_1561_cov_19.768817_g1723_i0_-_ORF_1_(frame_1)_translation	MKLIYIMLKIGNFKPHQLISTVVQKAFSTSQYVTSEEINKSARQYTFFSWSAQNLINPIAVVKAKGCYFWNAEGKRFFDMNSQLMCTNIGHGNEKVIKAIQDQAAELPFAHPAFSTRIRAEIGPLLARHTPGDLKKFFFCLGGAESVENAIKFAKFYTKRNKIMSRFRSYHGATQGAISVTGDPRRWPNEPSLPGTIKLFDPYKYRSHLYEPGMTDDQFSEKIIKEYEEILMYENPEAVAAIIVESVTGTNGVIIPPEGYLPRLRQLCTKYGIMLICDEVMSGFGRTGEWFGVDNWKVVPDIMTMAKGITSAYTPLGCVAINPKIAKEFEYKKYSGGLTYNAHPLCLAASCATIKFMEEADVVGNSKRMGKVMAGLMKKMQEKHPSVGEIRNIGLFGAI…
LEG_ACAT_NODE_3053_length_1349_cov_29.074451_g2325_i0_-_ORF_1_(frame_1)_translation	VSTQSTGYLMYSFTNILRRTFSNVVIVNGKRTPVGSFMGQLSSIPAPTLGAIAIKAALNASGVKKNEVDEVFMGNVICAGVGQAPARQASIQADLPTSVICTTINKVCASGMKAVQLGMHSILAGTSNVVVAGGMENMSLAPHFIYMRKGLGFGDGKLTDGILSDGLRDAGSQMLMGACVDKTHKTYKITRQEQDNWSIRSYERAIDATKKGILKNEIVPVSAEVKKGVRATVDKDEECFKFMKDKIPTLKPAFTKDGTVTAANASKNCDGGAAMVLMSEELAKKKNLRPVARIVGFADAAIAPVDFCFAPSFAIKKLLAQTKMTLKDIDFFEINEAFAGTALTNMKLLGIPAEKVNVNGSAVALGHPLGMSGARVVLALINVLQHHKARFGLSAICNG…
LEG_ACAT_NODE_3276_length_1299_cov_20.355628_g2541_i0_-_ORF_1_(frame_3)_translation	MYSFTNCLRRAFSSVVIVNGKRTPVGSFMGKLSSIPAPTLGAIAIKAALNASGVKKNEVDEVFMGNVISAGVGQAPARQAALQADLPTSVICTTINKVCASGMKAVQLGMHSILAGTSNVVVAGGMENMSLVPHFNYMRKGLGFGDGKLTDGILSDGLRDAGSQMLMGACVDKTHKTYKITRQEQDNWSIRSYERAINATKKGILKNEIVPVSAEIKKGVRATVDKDEECFRFMKDKIPTLKPAFSKDGTVTAANASKNCDGGAAMVLMSEENAKKKNLRPVARIIGFADAAIAPVDFCFAPSFAVKKLLAQTNKTIKDIDFFEINEAFAGTALTNMKLLGIPAEKVNVNGSAVALGHPLGMSGARVVLALINILQYHKARFGISAICNGGGGASSILL…
LEG_ACC_NODE_4307_length_1115_cov_3.511516_g3514_i0_-_ORF_1_(frame_2)_translation	DVASFFLDFAAGGISALIAKTATAPIDRVKLLLQTQQANVKLHGREYTGFSNCLTRVIKDEGVFALWRGNMSNVIRYFPTAALNFPLKDALSKYLCQYDPKKEPAKFFLGTLASGGFAGAISMLFVYPLDFARTRLGADMGRGLPERQFKGLRDCLKKIIKKDGVLQLYQGFPISVVGIFLYRALYFGGYDAGKALFFEEESRIPFWKRYLFAQSVTSTAETLSYPIDTIRRRLMVQVGSKERLYRGSIDCGLKILKNEGLKGFFKGGFSNICHGVGSSLVLVLYDEVQHLVEYIKQKIK
LEG_ACTE_NODE_12614_length_534_cov_16.075922_g11507_i0_-_ORF_1_(frame_1)_translation	YQRRVRDISNMINPNMKYVWQKYCSMPIQYGAEFTKLMSLVESDKLIKNHKQEVLFKLNVKDSMNNIFDTMHGGALMTMLDITTTLAISGLDKTMRHTVSIEMAMSFLNAIKSPSNILFHCRIPKIGKSLAFSYCDIYDEKTRVLCATGQQVKIFLNQTWKE
LEG_AK_NODE_7992_length_754_cov_19.512482_g7033_i0_-_ORF_1_(frame_2)_translation	MSLSFKQPLTLLMMGAPGVGKGTFSRFLSRDLKLPELSSGAELRRLIKTGKGELVDEIKRIQNAGKLVDDKIVLKMIAQRLEDPEFARGAILDGFPRTKDQAVAFNKLKQIDLAIKIDLNENILVRKLTGRRECSKCQRNYNIFSIQSDEYDMEPLLPKVEGICDECGGKLIQRSDDNEKTIVTRMETYKKLTIPMEYYFKEIGVPITTFEPRKGVKDYNKFKNLVFQDLSKIH
LEG_ALDH_NODE_5194_length_1000_cov_5.677454_g4350_i0_-_ORF_1_(frame_3)_translation	IRREPVGVCGQIIPWNYPLLMATWKLAPMLAMGCTTVLKPAEQTPLSALRLGELIMEAGIPKGVVNIIPGYGPTAGKAIVSSPLVDKIAFTGSTEVGMEIMRTAHTNGLKRLTLELGGKSPLIVMDDADLKSAVKIASDAIFFNNGQVCNAGSRVFVHEKIYDQFVKMKTEATKKRVIGNPLNKGVDHGPLVDQDQLKKYLHYVQKGKAEGAKLETGGKKVGTKGYFVEPTIFSNVTDNMTIAKEEIFGPVSSILRFKTVDEAIKRSNSSIYGLASGVITKNYDNMIRFANGLRQGSVWINCYSQLAANTPFGGFRNSGIGRELGKSGLQPY
LEG_ALT_NODE_2511_length_1511_cov_12.482615_g1835_i0_-_ORF_2_(frame_2)_translation	YGSQVLNMETVNQNLTKVVYEVRGGIVLRSEDIGREMAKGVKWPFNQFVYWNIGNPQKFRQIPLSFPREVLGYLYGGIASESCSADARARARTYLPELRKCAPYTYFKGMNIIREKIAKFITDRDNCETRREDILLGNGASAAIKTVLESMLNGQRDAILCPIPQYPLYSGTIQLLGSTLAGYYLNEEKQWEVDIDSLNMVYRNYYDNGFNLKAMVVINPGNPTGNILSEENIKDIIRFCYDHKLVIIADEVYQNNIYSDKKKWVSFKKVLSNLEPPYNQTGLFSFHSASKGSSGECGLRGGYSDMYNIPTKMKEAILKLKELEGCPNVVGQVAMDLVIDPPNLQTCSADTVALYRKEYQAVANDLKEKARLIHKNLNAMQNITCNEIEGALYAFPRIL…
LEG_ASCT_NODE_2346_length_1569_cov_54.854278_g1695_i0_-_ORF_1_(frame_2)_translation	YQRRVRDSMRNLFYGKNFSSKVFKNAAEAIKDMKPGVRILLGGFGLAGLAENCLNAVSQRKDLKDLEVVCCTAGTTDLGPGLLMKKKQVKRVISSYVGENQSLMKQYLAGELEVELCPQGTLCEKMRSGGAGIPAFYTPNGYGTVISDGGQAIKLKKDGKTPLIKSSPKEVREFNGRKYVMEPTITGDYAFVKGWKGDTKGNVIFRKTARNYNPDCAKAAKCAIVEVEELVQEGQLNPDQIHLPGVYTHRIFQGSNYVKPIEFLTLFKEEAFGKKLSADDIKRNKIAERAAQEIKNGMYVNLGIGIPTLVGNYLPKGIQLVIQSENGMLGNGPFPRKGFEDPDLINASKQTTSELPGCCYFSSSDSFAMIRGRKMDITILGSLQISRKGDIANWIVPGK…
LEG_ASCT_NODE_2408_length_1546_cov_31.947047_g1751_i0_-_ORF_1_(frame_2)_translation	YQRRVRGYSMRSLFQGKTFSSKVFKNAAEAIKDMRPGVRILLGGFGLAGLAENCLTAVSQRKDLKNLEVVCCTAGTTDLGPGLLMKNKQVKRVISSYVGENQSLMKQYLAGELEVELCPQGTLCERLRSGGAGIPAFFTPTGYGTVISDGGQAIKLKKDGKTPEIKSAKKEVREFNGRKYVMEHTMTGDYAFVKGWKGDTKGNVIFRKTARNYNPDCAKAAKCAIVEVEELVQEGQLDPDQIHLPGVYTHRIFQGSNYVKPIEVLTLFKEESAGKKLSADDIKRNKIAQRAAMEIKNGMYVNLGIGIPTLVGNYLPKGVQLVIQSENGMLGNGPFPRKGLEDPDLINASKQTTSELPGCCYFSSSDSFAMIRGRKMDITILGSLQVSRKGDIANWIVPG…
LEG_AST_NODE_1652_length_9363_cov_23.758553_-_ORF_5_(frame_1)_translation	MLANTISRSNAMIAMNVTKSFSSFWSHIPLRPADPIMGVVEDFKKDKNSRKVNLSAGTYKDDQGKPFILNCVKAAKKIILETNIDHEYLPIDGLQSFVNNSLQLAYSPENKALNEGKILGVQGLSGTGSLRIGFEFLSIFYEGNRTVYIPDPTWPNHKNVIARAGLNIKQYRYYDYKKKTLNLSGMLQDLDRAPKASIIVLHVCAHNPTGMDPTESEWNDIYNIIKKRNHFPFFDMAYQGFASGDPVRDSFGLRRFSNEGFRLALAQSYAKSFGLYGERVGCFSMLCESKEEVNRLLSHVKFLARAQYSNPPKYGAHIVDIVLSNPDLKKEWHRELKIMSDRLGLMRKKIYEGLKASGSKVNWDHIVKQIGMFAYTGLTREQVQKLISKHHIYLTDDGR…
LEG_ATM1_partial_NODE_34012_length_251_cov_0.876404_g32892_i0_extraction_translation_frame_2_reverse	FYSRSINYMLTSYSPIHYHTYNSLKYLNIPSKIFHDSQNHGNMFEKSTNNKSTNKEMKRK
LEG_CBS_NODE_2288_length_1595_cov_8.680026_g1649_i0_-_ORF_1_(frame_1)_translation	VRDLIPMEQHPEVVIDMVEYQKKACRWKLGGDKSEDPHIHEPYYLPKKIYENVAELIGNTPMVRLNNIPEAEGIQCEMLAKCDFFSPGGSAKDRIARRMIRDAQLKGVLTPGNGTIIEATSGNTGLGLAMAGGIAGYKVIITLPEKMSQEKSDVLNALGAEIVRTPAEAGFEYENSYAGMARKLQKEIKDSVILDQYVNPANSLAHYDQTAEEIWDQLDGKLDYIILTAGTGGTLMGVARKLKEKNPEINVIAVDAEGSILATPSSLNSKGIRAYKIEGIGSDFIPKTCERDYPIVDQWIKTEDKESFIMARRLIKEEGLLVGGSSGSAMCAAVQIAKNLPADKRVCVLFVDGLRNYLTKFVNDDWMLEGGFMNQEDYDAKYFPKSLRIYNGNTAEAII…
LEG_DnaJ_Jac1-like_NODE_2868_length_1401_cov_15.899096_g2157_i0_-_ORF_1_(frame_1)_translation	EYGRYKKNMSFFFNGFPFDMGGGGFSGFEGFEKPNAGPKKDVNTTRLYEILNVAKTANPDEIRKSYRKLAKEKHPDKGGDEKEFQDLQMAYEVLSDENKRKVYDQYGEEGLKEGRADSSGFEGGDLFDLLQGRMGGGGSSGKRKTKSVLHNLNVTLEDVYNGKTRYLEISRYRVCTTCKGSGSKDANANTKCKGCDGKGVKIVIQRLPMGMIQTQQECNDCKGEGYVIKEKDKCKSCKGQKVTKVSKTIEVNIDKGAPDGKRYQFAGESDEVPGYEPGDVVVEITIEKHKKFLRKGADLVYTADLSLLEALTGFELVITHLDGRSIQVKSNPGQVIKPGVLKTVKDCGMPFFEAPYKFGNLFISFNIVFPEKLNDSQKVNLTQLFPALVQEPITEKIDE…
LEG_DnaJ_Jac1-like_NODE_3155_length_1324_cov_11.387690_g2426_i0_-_ORF_1_(frame_1)_translation	MSFFFNGFPFDMGGGFGGFDGFNEKQSSGPKKDVNTTRLYEILKVTKTATPDEIRKSYRKLAKEKHPDKGGDEKEFQDLQFAYEVLSDENKRKVYDQYGEDGLKEGRADASGFEGGDLFDLLQGRMGGGSSGKRKTKSVLHNLNVTLEDVYQGKTKYLEISRYRICITCNGSGSKDPNANTKCKGCDGKGVKIVVQRLPMGMIQTQQECNDCNGEGYVIKEKDKCKECKGQKVTKVAKMIEVNIDKGAPDGKRYTFAGESDEVPGYDPGDIVVEIIIEKHLKFLRKGADLVYTADISLLEALTGFELVITHLDDRKIQVKSTPGQIIKPGVLKTVKDCGMPFFETPYKYGHLYISFNIIFPEKLNDTQKVNLTQLFPALVQEEFTEKIDEVYTMTDFKP…
LEG_DnaJ_NODE_6246_length_892_cov_3.452991_g5350_i0_-_ORF_1_(frame_2)_translation	STGEQNMLINHTRTILLRHVKEIKIVIQVHKKSLIDFDPRKDYYKILGVKETANENEIKNTFYKLAKMYHPDVNQGKTNEQFKEMSAAYDVLSDPKKRKEYDNYRRKYGYGYGYAPRQSQSQERASYAHERGADEDFDDIFNESRYSEDRFQNYWKKSKYYSDDEKETYRDRKNRKTMSIFLFCTILGYGLFLLLTKENSEDEFRVITPYRKGHLSSEKNKMNH
LEG_DnaK_NODE_1545_length_2083_cov_40.971144_g1002_i0_-_ORF_1_(frame_1)_translation	VSTQSTGYLMNSNTKAPAIGIDLGTTYSCVGVWLNGKVEIIPNDMGERTTPSYVAFTETERLVGDAAKNQITRNPTNTVFDAKRLIGRKYGESVVQEDIKLWPFKVVKEETGDRPQIVVLFQGQERKFFAEEISAMVLQKMKKIAEDYLGGKDCKDAIVTVPAYFNDSQRQATKDAGIISGLNVLRIINEPTAAAIAYGLDKKFKNERNVLIFDLGGGTFDVSVLSLEEGLFEVRATNGHTHLGGEDFDNRLVEYCAGEFRRKTGIDLKENPKALRRVRASCEKVKRALSASTQAVVDIDALMDGKDLSVSLTRAKFEELCMDLFRKCIPPLDNVLKDSKLSKSEIHDVVLVGGSTRIPKICQMVQDYFNGKEPNKSINPDEAVAYGAAVQAAVVTNVQ…
LEG_ECH_NODE_4311_length_1115_cov_2.821497_g3518_i0_-_ORF_2_(frame_3)_translation	HNSSCVEIILHNPKKLNATSHEMCLSLAKKLIKFVPQGIKPLKGLTSDDSTSDEDSVIPKTIILTGSAEGKSFCCGGDVKGIYARKMQNDISTVYFNYDLHIFINTCFLKIKPMLQISIWNGYAMGGGLGLSINSPIRIATENTIFAMPEAMIGFFPDVGAAYFLPRLFNNSFALGLFVGLTAYNIKGRECLTSGAATHYVLDKDIPLVKEQIIKLSEEKEIVTAEDVSEVLKSYGECYSPEIFEFKNKQFIEQVFSP
LEG_ENO_cyto_NODE_3042_length_1351_cov_10.991393_g2315_i0_-_ORF_1_(frame_2)_translation	MPLYAYIAQLAGNPIDKFTMPVPSLNVINGGSHAGNQLALQEFMILPTGASSFKEALRIGAEVYQNLKKVILEKYGLNATNVGDERGFAPDINDAEEAIQLLEAAILKSGHKDKVTIGMDCAASEFWDEGENKYNLRFKSKNDPLMISGDDLGELYSQWASKYPIVSIEDPFEQNDFESYAKFTEKAQGKFQIVGDDLLVTNPVRVQVGIDKKLCNALLLKVNQIGSVTESIEAYKLARKNGWGVMVSHRSGETEDNFIADLVVGLGTGEIKTGAPCRSERLAKYNQLLRIEEELGTNSVYAGQNFRYPY
LEG_ENO_NODE_2519_length_1508_cov_13.321254_g1843_i0_-_ORF_1_(frame_2)_translation	MLSKGFQSSIRKLFMLPSGSFFSSVKKIKSIKAREILDSRGNPTVEVDLTLDDYSLHRAAVPSGASTGIYEALELRDKDKNRYGGKGVLKAVSNVEKIIAPALIGQNAQEQAKLDKLMVEKLDGSKNEWGWSKSKIGANAILAVSMALCRAGAHSAKVPLYEWIARLAGNPTNHYIMPVPSLNVINGGSHAGNQLAVQEFMLLPTGATSFRDSIKMGAEVYQALKKVILEKYGLNATNVGDEGGFAPDISNTEEAFQLLQAALEKSGHKGKVQLGMDCAASEYYEEDTKQYNLLFKNKEKKQLLSKDAMVDLYSQWIDKYHVASIEDPFDQNDFESYSKFTKRNANKTQIVGDDLLVTNPVRVKMAIEKKLCNALLLKVNQIGSITESIEAYQLSKKNH…
LEG_ENO_NODE_2595_length_1480_cov_15.297797_g1904_i0_-_ORF_1_(frame_2)_translation	YQRRVRGLFNMLIQGFQNSMRRLFMLPSGSFFSSVKKIKSIKAREILDSRGNPTVEVDLTLDDYSLHRAAVPSGASTGIYEALELRDKDKNRYGGKGVLKAVSNVEKIIAPALIGQNAQEQAKLDKLMVEKLDGSKNEWGWSKSKIGANAILAVSMALCRAGAHSAKVPLYEWIARLAGNPTNHYIMPVPSLNVINGGSHAGNQLAVQEFMLLPTGATSFRDSIKMGAEVYQALKKVILEKYGLNATNVGDEGGFAPDISNTEEAFQLLQAALEKSGHKGKVQLGMDCAASEYYEEDTKQYNLLFKNKEKKQLLSKDAMVDLYSQWIEKYRVASIEDPFDQNDFESYSKFTKRNASKTQIVGDDLLVTNPVRVKMAIEKKLCNALLLKVNQIGSITESI…
LEG_FUM_NODE_2454_length_1533_cov_6.770548_g1787_i0_-_ORF_1_(frame_3)_translation	VRVKANFQIWRNTTSSASTSPNAVSAGFRVEHDTFGPINVPNDKLWAAQTQRSLQNFEIGTKEDKMPLSIIRAMAIIKKGCAKVNMGYGMKKEIGNVIMKAADEIIEGKLDDQFPLVIFQTGSGTQTNMNLNEVISNRACEMMGGKRGEKSMVHPNDHVNKSQSSNDTYPAAMHVAVMIDLNKYLIPTLASFKANLERKVKEFDKIIKIGRTHTQDATPLTLGQEFSGYLTQVSSHIEHIKHNIKYLCMLAQGGTAVGTGLNTKKGFDVLIANELAKETNLPFETAPNKFEALATHDALAHFSGTLNSLASSLYKIGHDIKLLSTDLGELDVEDVSPCEELLMACVQTMGNHTAVTLGNMHGHFELNVFKPLIVSNILNSIYLLSSAISNFNENLIKNL…
LEG_GCSH_NODE_18455_length_384_cov_9_633441_g17335_i0_translation_frame_2_reverse	STGYKKTSMQRYISSLSQIARHHVYYSVLRSFTMKFSKEHEWVKLDQDVATIGITHHAQSELGEIVHIELPKNKTTFKAGDSMGTVESVKTVADIFAPIDGTVLTSNVELSKKPSLMNTSPLKEGWY
LEG_GCSL_NODE_2905_length_1387_cov_3.812024_g2192_i0_-_ORF_1_(frame_3)_translation	AGPAGYIAAIKAAQKGLKTACIESRERLGGTCLNVGCIPSKALLNITQKFHEAKWQFKDFGIHTGQVSYDFNQIMNKKNRIVNGLTKGIEMLFKKNKVDHLKGWGKFQDEKTILVETAPGKGKTYRSKNFIIATGSEPNNLPGGILPIDEKRILSSTGALSLQEVPKKLVVIGGGVIGLEIGSIYQRLGSEVEVVEFMDKILPNFDTELSSYFFNLLKKSGIKFSLSHKVVGGSYAGDSIKVVAEDIKNKGQRKEITGDYALIATGRRSFTKGLNLEGLGIKLDKQGRIPVGKSLQTKIPGIYAIGDTIEGPMLAHKGEEDGVAAVEIICGEPGHVNHSVIPNVVYTHPELAFVGETEEEIKAKKIAYNKGKFPFLANSRAKATEDFNGFVKVLAEKKT…
LEG_GCST_NODE_3560_length_1244_cov_7.789069_g2813_i0_-_ORF_1_(frame_1)_translation	MLQKISRSFFSSMEVLQRTALNSIQKNLLKGKMVPFAGWEMPVQFTGIIDEHLHCRTKAGLFDVSHMGQVRIRGKDRKNFIESLCVSDVHELPLSNASLSLLTNDKGGIIDDCIITNLPDFLNIVVNASRKDRDLAHILKMKDDHWRNKDVQIEYMGKRSLIALQGPLAAKTLQAYVPNFNLSKLLFMRASFLTIPKISEDVLVSRCGYTGEDGFEISVSSQKAEQFFDLLLKTPDAKPCGLGARDTLRLEAGLCLYGHELDEEKTPIEASLRWIIGKRRAKKGGFPGADVIFNQMTKGVSIHRVGFVLGSGPAAREGTTISNKDESQVIGKISSGTFSPTLRKPIAMGYIKSGFQKRGTEVRLNVRGKGCKAVVSAMPFVPHKYFKK
LEG_GcvP_fused_NODE_995_length_3055_cov_7.581489_g566_i0_-_ORF_2_(frame_2)_translation	MHKDKLCCLMVTYPSTHGVFEEKIKEMTEIVHNNGGQVYMDGANMNAQVLLTSPGTIDADCCHLNLHKTMAMPHGGGGGGSGPICVKKHLTEFLPGHVHINKSPDKNWSTSSAPHGNAGLLPITYMYIKMLGKDIKKSTQIAILNANYMMEKLNGPYKILYRGKNNKVAHEFIIDVRDIKKKTGVSEEDIAKRLMDYGFHAPTISFPVPGTLMIEPTESEDKEELDRFCDAMIEIRNEIREIEEGKADKKDNVLKNAPHSQDHCISTAWKHPYSREKAAFPLPYIKKRGKFWPSVGRIDNVYGDMNLKCCL
LEG_GcvP_fused_NODE_2333_length_6403_cov_20.343372_-_ORF_3_(frame_3)_translation	MSDIHPFSPLYQMKGSYQLFKELSQMLLTITQFHSISFQPKSGAHGELTGLLTIRRYFESIGEKQRNICLIPASSHGTNFASASFSGLKVIVISTDEKGNVNINDLREKAQEHKDKLCCLMVTYPSTHGVYEERIKEIVEIIHLNGGQLYMDGANMNAQVLLTSPGTIGADCCHLNLHKTFSIPHGGGGPASGPICVKKHLASFLPGHFHITNQLHDNNWSTSSSPYGNAGLLPITYMYLKMLGTDIKKSTQIAILNANYMMERLSGSYKILYRGKNSRCAHEFIIDVRDIKKRCLVSEEDIAKRLMDYGFHAPTISFPVPGSLMTEPTESEDK
LEG_GcvP_NODE_995_length_3055_cov_7.581489_g566_i0_-_ORF_1_(frame_1)_translation	MINFSIKTFLNLKALRSLAPTLSMTNRVKLISTSRIMEIEKNPQISDVLKHDKFTSRHIGPSNEEIKEMLKVVKADSLEEFTTAAVPEIIRLPENAKREQEKILGGAISEHTALMNLKEIAGKNTLFTNYIGCGYNPVIVPPIILRMILENPMWYTSYTPYQAEISQGRLESLLNFQTLIAELTGLPISNASLLDEANSAADAMNMAYGILEGARSTFFIAENLFPFIKDTIKTMAHHRNINIIEGNPADESILNNPNIFGGIVQNPDNLGKVSEYSEFAKRLKQNGAIPIIATDISSLLLTKTPAEMGFDIAVGSAQRFGVPMSNGGPHAGFMSTKEEYKRKFPGRIVGISKDKFGNPGYRLSLQTREQHIRRDRATSNICTAEALLANMAAFYAIFH…
LEG_GDH_NODE_2144_length_1663_cov_7.514465_g1519_i0_translation	GVDRFFSQSPLPQAKAKDAKEDDPDFLDMVHAYFDKASSHVKVPDYYLKLIKATKAAVRFSFPLVRDNGSIESIDAFRAQHSLHQLPTKGGTRFAKHIDMRANEALAFLMTMKLSVHHIPFGGAKGCVKIEPSNYSHAELLRLTRRYTLELAKKNFIGPGIDVPGPETGTGEDIMNCMKDTYVTFYGDKDVNSVACVTGKSVSQGGIEGRVESTGLGVFYGLKEVMSNPYISKKYMFKPDIAGKTFIIQGLGNVGYWVSKFIEGAKGKIIGIEEMNSSAFNPDGLDIQMALDFKNKNKTLKGFPGATETYGSDEDYRQVLYRDCDVLIPAAFEKTINKSNAEKINCKILGEASNGPTTLAADEILEKRGILVVPDILLTTGGATVSYFEWLKNLEHQQL…
LEG_GDH_NODE_2427_length_1542_cov_5.198094_g1766_i0_-_ORF_1_(frame_1)_translation	VREYLRKFFIKTPGTNFALLGPLSRSFSVSQPSSVLKEKEKGANGDRPNFLEMVYEYIDKAAPHANIPKHYLNLIKATKAAVRFSFPVTRDDGTIESIEAYRAQHSLHKLPTKGGTRYAEKIDMSDIEALACLMTLKLCVHNIPFGGAKGGVKINPKNYSKEELMRITRRYTLELAKKNFIGPGIDVGGPESGTGEMVMNCMKDTYVGIYGGKNVNALACVTGKSASQGGIEGRSESTGLGAFYGIKEVLNNPTLCKKYGYAPGIKGKTFIVQGTGKVGVLLSRFISSAGGIIIGFDEEGSSAYNPSGLDLQAALSYFSKNQTLKGLPGATESYGKEEDHGKVIWKPCDVLLPAAIEKSINMSNACKINCKIVGEVANGPTTVAANEILEKRNILVIPD…
LEG_GrpE_NODE_5589_length_956_cov_5.771234_g4728_i0_-_ORF_1_(frame_2)_translation	YGICVKMNTIFRSNLCKQKVIFNTIKMHTFAHNLLLSNTRNGQRSINSIPNQIDCFFNFSASKSINPLSRASRPLMNMNYKSYFSTKEDGRVKEEESEHEDKTEAKSGNVKSTEFKEKADSQDNRQEEDYIALSKYVELKTLFEEQSKKSDMIRKKFEEIKKLYLDNVSETEQIKLRYSQEIKSMKDLALSKFAKDMLDVQDNFSRILSLLKEKEFATLADAGKIETFMSFLNGIKQVKSNLSSTLEKNGVKEYSPHHERFDPNKHEAVYDYQDNMGISGTVGHVLQSGFIIGDRVLRPAKVAVVKKK
LEG_GSCL_NODE_5631_length_952_cov_4.526735_g4766_i0_-_ORF_1_(frame_2)_translation	STVIGGGVIGLELGSIYKRLGSEVEIVEFLDKILPKFDYEISSYFLNLLKKSGIKFSLGHKVVGGSYNGDSIKVLAEDINNKGQIKEITGDYVLIATGRRSFTKGLNLEGLGIKVEKNGKIPVGKSLQTKIPGIYAIGDTVEGPMLAHKGVEEGIAAVEIICGEPGHINHNVIPNVVYTHPELAFVGETEEEIKAKKIEYNKGKFPFTANSKAKSSEEDNGFVKVLADKNTDKILGVHIIGPNAGELIAECVLAMEYGASSEDIGRTCHAHPSLSEAVKEACLATFDKPLNL
LEG_HIBADH_NODE_5234_length_995_cov_105.456616_g4390_i0_-_ORF_1_(frame_1)_translation	YQRRVRDLMIRVFPKRFLSHKVTFIGLGNMGHYMSRHLVKAGTTVFGYDVRQDIIDKFVADGGAKYDHVDDAINQSDAVLTILPNFKIVQKVWEMAYKGARKGTMFIDCSTCPPFDIADLAKQAKSRGLVPVDAPVTGAQPGAIKGTLNFLIGVEKEHFQKARDILRPMGKNFFHCGGNSMGQVAKVCNNLCLAINISGLSESIVLGQKFGMDPKLLTEVMNAGSARCWSIDTYNPVPGAVATAPSTNDYKPGFANELMCKDVNIANDAIDKLKIHAPLSRKTKEIYEALKKEVPEKDFSYVYQYVLNKKI
LEG_HIBADH_NODE_5721_length_941_cov_7.737327_g4851_i0_-_ORF_1_(frame_3)_translation	MMHIYPKRFLSHKVTFIGLGNMGHYMARHLVQAGTTVFGHDIKQDMIDKFVADGGAKYEHVEDAISQSDAVVTILPKFPVVQKVWDMAYKSAKKGTMFIDCSTCSPFDIAGLLKQAKKKGFIPVDAPVSGGQPAAMKGTLNFLVGAEKEHFEKVREILQPMGKKFFYCGGNSMGQVAKASNNLLLAITICALSESIVLGQKLGMDPKLLTEVMNAGSARCWCIDTYNPVPGALSTAPGSNDYKPGFTNELMLKDVNIANDAMDRMKIYAPLTKKTKEMYETLKKEVPEKDFSYVYQ
LEG_Hsp10_NODE_17382_length_405_cov_3.415663_g16264_i0_-_BLAST_Hit_translation	ITTLSPLLNRCLIQKIIPKQISKGGIILPDKATEKEARLGKVIAVGPGERTEKGEIMKPYVKIGDIVLLPEYQGAKVPMADTESEYLIYKDTELLGIIEGFKH
LEG_HSP60_NODE_1866_length_1812_cov_14.726279_g1275_i0_-_ORF_1_(frame_3)_translation	MMLSTIRFNSLTSGSLGILPHSLKMNFSGKEIVHGEKARKYMLMGVNKLADVVQVTLGPKGRNVILDQAYGDPKITKDGVTVAKQIEFSNKLINLGASLVKQVANRTSSEAGDGTTTATILAREIFKQGCKSVTSGMNPMDIRRGMILAVEKIEEYLKAKSKKISSKEDLTQVATISANNDKEVGQLIASIIEKVGTEGTINVQTGKTLVHEVEYVEGLKFDRGYISPYFITDAKTQKCEYDNALVLVMENKVTDIQALAKILEYAVVKQKPLLIICEDVESEALAMLIINRLKVGLKVCAVKSPGFGDNQKNMLSDIAISTGATVLSEEIGLTLQNALPDKHLGVVKKVIVTKDDTILIEGHGDKKAISDRISQIRDQLPRTTSDYDKEKLQERLGKL…
LEG_HSP60_NODE_1910_length_1786_cov_8.406305_g1311_i0_-_ORF_1_(frame_1)_translation	MLSKIFLNYKPQSSHLLFPSSVKRFFSEGKDIIHGEDCRKKIILGVTKLADTVQVTLGPKGRHVIIDQKFGEPKITKDGVTVAKSIDFNDRYMNLGASLIKQVANRSNNETGDGTTTATVLARKIFIEGCKSISGGMNPMDIRKGILIAVNKVEEYLNKISMKISGKEQLANVATISANNDKQLGQLIADIMTKIGPDGTVTVESGKTVEHAVEYVEGFKFDRGFLSPYFITDFKKQVCEFEKPLILLMEDKLKDSDVQQLVKVLEYAKQTGRPLLIVAEEVEAELLATLIVNKLRNNLRVCVVKPPGYGDNKKDYLQDIAISTGGHIFSEEIGTTLQNADPKSLIASLGSCKKIIVNKDDTIIIEGTGDKKHIEERISQLRQLITTTQSTYDKEKLQE…
LEG_HSP60_NODE_1923_length_1780_cov_24.185120_g1324_i0_-_ORF_1_(frame_1)_translation	MMLSKIRFNSLSASTLGIFNFMKMNFSGKEIVHGEKARKYMLIGVNKLADTVQVTLGPKGRNVILDQAYGDPKITKDGVTVAKQIEFSNKLINLGASLVKQVANRTSIEAGDGTTTATILAREIFKQGCKSVTSGMNPMDIRRGMLLAVDKIEEYLKSRSKKISSKEDIAQVATISANNDKEVGQLIASIIEKVGTDGTINVQTGKTLVHEVEYVEGIKFDRGYISPYFITDAKSQKCEYDNALVLVMENKITDIQALAKILEYAVNKQRPLLMICEDVESEALAMLIINRLKAGLKVCAVKSPGFGDNQKNMLTDIAISTGATVLSEEIGLTLQNAQPDKHLGVVKKVIVTKDDTILIEGHGDKKAINERISQIRDQLPRTTSDYDKEKLQERLGKLT…
LEG_Hsp90_NODE_1428_length_2217_cov_19.714552_g905_i0_-_ORF_1_(frame_3)_translation	VRVILKENIPMNTPTDTDTFNFNADINQLLSLIINTFYSNKEIFLRELISNASDALDKVRYMSITDPSVLRNEEKLFIRIIPDKTNNTITLWDSGIGMAKADLISNLGTIARSGTRQFMELLNAGADISMIGQFGVGFYSSYLVANKVVVISKSNDDDQYRWESIANSTFVVTKDVILEDGSNSIGRGTKVILYLKDECIEYLEERKLKDLIKKHSEFISFPIELWVEKSTEKEVEDDDEEEKKEGDEPKVEDETKKDKKKKKIKEISHEFERVNNTKPLWLRKKEDIKKEEYANFYKSITNDWEEHLSCIHFTMEGNLEIKGILFVPKRAPFDLFEAKKKKTNIKLYVRRVFIMDDCDELIPEYLGFVRGVIDSDDLPLNISRETLQQNKILKAIKKA…
LEG_IBD_NODE_11774_length_567_cov_1_900810_g10672_i0_translation_frame_3_reverse	VGGAAFCLNQVKEYTQNRKQFGKKISSFQNTQFKFAELATNLHGCRLITRFAASSIDTQNPDTLTYSAMTKLFVPERCFNIANETLQLLGGYGVLREYQVERVFRELRMHMIAGGTVEVMKMLVARNTLIH*KFKILFHNGSEYK*TKTSDYN*SKKTHTLLRAMQEKSS*KRNYLTYLQLPKYTR*T
LEG_IscU_NODE_13193_length_515_cov_2.194570_g12086_i0_-_ORF_1_(frame_3)_translation	INAEYGILNMLSMTKNVLTRTPFNVVKLYHSKVIDHYEKPRNVGTLPKNDPTVGTGLVGAPACGDVMKLQIQVNDKDVIEKAVFKTFGCGSAIASSSYATELIKGKTIQEALKIKNSDIASYLSLPPVKLHCSMLAEDAIKAAVDDYKVKNKNKKLGDTIVPH
LEG_MDH_NODE_4799_length_1050_cov_20.103378_g3983_i0_-_ORF_1_(frame_1)_translation	MLNTFIKAAFSTKIPKTVAITGGTGNISYALAFRVASGELFGKDQPVNINMIDIPPMEPRLVGVKMELDDCAFPLLNKITTTSKLSVGFKDIDAAFLVGSKPRSKGMERADLLKANGAIFVDQGKALSDYAKRDVRVLVVGNPANTNCLIAWKNAKTLKPTCFSAMTRLDHNRSLAQLSMKTNGPVSAIEKFTIWGNHAASMYPDLHNTTVNGKKALSLVPREWYEKTFIPVVAQRGAEIIKARGASSAASAANAAIDCVRDWVKGTKGWVSMAIPTDGKFYNIPKDIVFSVPCTAGKGEYHPVLGVKFDEFSKKKIKVTTDDLLSERKDVEHLLI
LEG_ME_NODE_1398_length_2251_cov_18.075758_g882_i0_-_ORF_1_(frame_1)_translation	MDNLALTYTPGVAASCLEIQKDIRKAYRYTNKGNSVLVLTDSSGFEQVCNGEKWDNNAVMPYLEAFCVNYKLVANIDAYPIIVDFSSIKSPEDFIETINGVMPGYSAVEFWNVCPERLAGYYELLAKDSVYNKTYATIDTKNKRKLDEYFESLGVLFTSNTFYAAIIRAALDTHCKENLNDLAAHVLGLIKEGKISLDKSNLYRSLTEVLSHAVDYILENNLHDTTLDEFNLDKEPTSKKYVMEKYKKFLKFGGKSWIDTFPNNYYFPQHKNDENSLLCHARLKGVIELSPKLQLHDPYDLYEIFSWKNLDKISNIILENPEEVMNLTCKNNLAAIITNGTAILGLGNIGALPGLPVMEGKSVLFRSLGGTNVIPICIQEWDNDKLIRICHRISPTFSM…
LEG_mgen_2OGMC_NODE_82_length_43555_cov_76.820646_-_ORF_11_(frame_1)_translation	MNFLIGGASGMIAIAVVQPIDFLKVQIQVKSEMGVKNLNPFSIAKEIYKKTGGIRVFYKGLDSALLRQAVYTSTRLGLFYNIKDYLTKKSGKQPSMLMNTCASLFAGAVGAFVGNPADLALIRIQSDTNLPVNERRNYKNVFDALFRTMKEEGLFTLWRGSMPTVCRAMAMNFSLLVPFEETKKFLKPYVKGERARACWAAMISGICATVLSLPFDNVKTKLQKMKAGPDGKLPYKGVLDCFIKTANLEGTSKLWVGVNTYYIRVAPHAVISLVTNDILRSFFTSKTKKN
LEG_mgen_2OGMC_NODE_132_length_37501_cov_21.001953_-_ORF_13_(frame_2)_translation	MNKPAEIRPVADQQKIPVHTQQNMALNFLLGGISGCIATLSIQPLDMIKVRIQLLSEMGQKRVNMFKVAGEIVKKDGICALYKGLDSALARQIIYGTTRLGLFYSFLDYFKRERPEPTILQKSVSSFVAGGIASIVANPADLILVRMQADGALPPAQRRNYKNVFDGIVRIIKEEGFTKLWRGCIPTIARASILNLSLLAPFEEFKVRLKNVIKDTTARTMVSSMLASLIGSLSALPFDNAKTKLQKMKPNENGVLPYCGIVDCMIKTVRTEGLFKLWVGLPTFYIRIGPHVIITLMMNDFLRSKLLKKHH
LEG_mgen_2OGMC_NODE_5580_length_2296_cov_30.212079_-_ORF_1_(frame_1)_translation	MNFLIGGASGMIAIAVVQPIDFLKVQIQVKSEMGVKNLNPFSIAKEIYKKTGGIRIFYKGLDSALLRQAVYTSTRLGLFYNIKDYLTKKSGKQPTMLMNTCASLFSGAVAAFVGNPADLALIRIQSDTNLPVNERRNYKNVFDALFRTMREEGLLTLWRGSMPTVCRAMAMNFSLLVPFEETKKLLKPYVKGERARACWAAMISGICATVLSLPFDNVKTKLQKMKAGPDGKLPYKGVLDCFIKTANVEGTSKLWVGVNTYYIRVAPHAVISLVTNDILRSFFTSKTKKN
LEG_mgen_AAC_NODE_391_length_26035_cov_42.379419_-_ORF_19_(frame_3)_translation	MISFILNLMPHPSKGSHQETGSITSFLIDFLAGGVSGSIAKTIAAPIERVKILLQTQQANANLKGKQYTGIFNCFSRVIKEEGVGALWRGNLSNIIRYFPTQAINFSTKDALQKYFCPYNPKTQPLQFFVGNLLSGGIAGAISLFCVYPLDFARTRLGADMGRNPSDRQFKGLGDCLRKILKTDGFRGIYRGFGISVLGIFIYRSFYFGCYDTGKKIFFNEENKNVPIWQKFLFAQLVTSTSESLSYPIDTVRRRLMMQAGRKEKIYNGTLDCAVKIFRKEGFRGFFKGNFSNICRGLGSSLVLVLYDEIQKILKPKKPVPVVVKPVEVKPVEVKPVVITKEK
LEG_mgen_AAC_NODE_1641_length_9412_cov_35.674744_-_ORF_1_(frame_1)_translation	MPHQSKGSHQEGGNLTSFLIDFLAGGVSGSIAKTIAAPIERVKILLQTQQANANLKGKQYTGIFNCFTRVIKEEGVGALWRGNLSNIIRYFPTQAINFSTKDALQKYFCPYNPKTQPLQFFLGNLLSGGVAGAISLFCVYPLDFARTRLGADMGRNPAERQFRGLGDCLKKILKTDGFRGIYKGFGISVLGIFIYRSFYFGCYDTGKKIFLSEENKNVPIWQKFLFAQLVTSVSESLSYPIDTVRRRLMMQAGRKEKLYNGTLDCAVKILRKEGIRGFWKGNFSNICRGLGSSLVLVLYDEIQKVMKPKKPVEVKVMPAVVKLVEVKPVEKPKESK
LEG_mgen_AAC_NODE_4136_length_3270_cov_6.534203_-_ORF_1_(frame_1)_translation	MYQCYCCIFLLIMSLHPITTEKSPEVDNLHSFFIDFVAGGVSATVAKTVLAPLDRVKLLLQTQHVNVQLQGREYTGIINCFTRVIKEEGVFALWRGNLSNVIRFFPSQAILFPVKDALEKYLCQYDSKEAPIKFFIGNLASGGLSGAFTDFFVYPLDFARTRIGSDMGRGLEGRQFKGIVDCLKKTIKKTGAFQIYQGFPASVMGIFIYRALYFGGYDAGKKLFFSEESTQIPFWKRYVFAQGIVAAADTLSFPFATVRRRLMMQVGRKRQLYSGTIDCGLKILKHEGITGFYKGGFANIFRSFGSSLVLVLYDEFQQILKYISNR
LEG_mgen_AAC_NODE_5072_length_2548_cov_30.002478_-_ORF_1_(frame_1)_translation	MYKSYFCLFLLIMSRPVTTRKSHAEDVASFFLDFAAGGISALIAKTATAPIDRVKLLLQTQQANVKLHGREYTGFSNCLTRVIKDEGVFALWRGNMSNVIRYFPTAALNFPLKDALSKYLCQYDPKKEPAKFFLGTLASGGFAGAISMLFVYPLDFARTRLGADMGRGLPERQFKGLRDCLKKIIKKDGVLQLYQGFPISVVGIFLYRALYFGGYDAGKALFFEEESRIPFWKRYLFAQSVTSTAETLSYPIDTIRRRLMVQVGSKERLYRGSIDCGLKILKNEGLKGFFKGGFSNICHGVGSSLVLVLYDEVQHLVEYIKQKIK
LEG_mgen_AAC_NODE_11147_length_1013_cov_16.349887_-_ORF_1_(frame_1)_translation	MSQHFIMSPAERQKRVHKGDFLAGIIANTWSTIVMTPIQKYSFPKIAEFLKKECPIKLWQGSRYSLHRAAFIGGLNYFFKGMIGRFVLPADFSKHKLQFVLGKVLCGLFSGVVPWTFVYPMDIIRGKLLKEGKVFNCSNIKAVMHAEGLKGIYNGFAGSLYWLCGYRAVLIGCYDTINKYLWPDNSKAPTLHRYLLGQTVALGAGVIFVPLDKIRVKMQADKKAYSGVFDCANKIFEKEGICGFY
LEG_mgen_AADH_NODE_274_length_30393_cov_26.575861_-_ORF_19_(frame_2)_translation	MLARVLSMSKKIGEFQFKHICSISTRKFSSAPKTEPNFLEMVRQYFNEAAKHIDIPKYYIDVIKNAKAVVQFNFPLVRDDGSIEVISGYRAQHSLHYLPTKGGTRYAEHIDLAETEALAALMTLKLSVHNIPYGGAKGGVKINPRLYSEKELIRLTRKYTIELAKKNFIGASIDVPGPDLGTNEMIMNTMKETYATLYGEKDINAHGCVTGKSVNQGGINGRTESTGLGVFYGLREVCNNKKLSEEHGFEPGIEGKKVIIQGLGNVGFYATKFLRNAGAKIVGVVEFNSSAFNPEGIDTEDLYKYKEKAKTLHGYPLATESYSDKQDFHTIMYKPCDILIPAAVERSLHCGNADKLNCKIVGEAANGPTTCAANEILEKKNVLVVPDLVLNAGGVTVSY…
LEG_mgen_AADH_NODE_1097_length_13586_cov_46.319860_-_ORF_6_(frame_2)_translation	MLARALAMSKYIGEFHLKHICSLHTRRFSSHLAPKTEPNFLEMVRQYFNEAAKHIDIPKYYIDVIKNAKAVVQFNFPLVRDDGSIEVISGYRAQHSLHYLPTKGGTRYAEHIDLAETEALAALMTLKLSVHNIPYGGAKGGVKINPRLYSEKELIRLTRKYTIELAKKNFIGASIDVPGPDLGTNEMIMNTMKETYATLYGEKDINAHGCVTGKSVNQGGINGRTESTGLGVFYGLREVCNNKKLSEEHGFEQGIEGKKVIIQGLGNVGFYATKFLRKAGAKIIGVVEFNSSAYNPEGIDTEDLYQYKEKAKTLHGYPRATETYSDKQDFHTVMYKPCDILIPAAVERSLHSGNADKLNCKIVGEAANGPTTCAANEILEKKHVLVVPDLVLNAGGVTV…
LEG_mgen_AADH_NODE_1728_length_8887_cov_37.692237_-_ORF_3_(frame_1)_translation	MLARALSMSKMIGEFHFKHLYCLASRNFSSHMAPKTEPNFLEMVRQYFNEAAKHIDIPKYYIDVIKNAKAVVQFNFPLVRDDGSIEVISGYRAQHSLHYLPTKGGTRYAEHIDLAETEALAALMTLKLSVHNIPYGGAKGGVKINPRLYSEKELIRLTRKYTIELAKKNFIGAAIDVPGPDLGTNEMIMNTMKETYATLYGEKDINAHGCVTGKSVNQGGINGRTESTGLGVFYGLREVCNNKNLSEAHGFEPGIDGKKIIIQGLGNVGFYATKFLRQAGAKIIGVVEFNSSAYNPEGIDTEDLYQYKEKTKTLHGYPRAKESFSDKEDFANVMYRPCDILIPAAIERSLHVANADKLNCKIVGEAANGPTTCAANEILEKKNILVVPDLVLNAGGVTV…
LEG_mgen_AAT_NODE_1415_length_10876_cov_21.302726_-_ORF_5_(frame_2)_translation	MKLIYIMLKIGNFKPHQLISTVVQKAFSTSQYVTSEEINKSARQYTFFSWSAQNLINPIAVVKAKGCYFWNAEGKRFFDMNSQLMCTNIGHGNEKVIKAIQDQAAELPFAHPAFSTRIRAEIGPLLARHTPGDLKKFFFCLGGAESVENAIKFAKFYTKRNKIMSRFRSYHGATQGAISVTGDPRRWPNEPSLPGTIKLFDPYKYRSHLYEPGMTDDQFSEKIIKEYEEILMYENPEAVAAIIVESVTGTNGVIIPPEGYLPRLRQLCTKYGIMLICDEVMSGFGRTGEWFGVDNWKVVPDIMTMAKGITSAYTPLGCVAINPKIAKEFEYKKYSGGLTYNAHPLCLAASCATIKFMEEADVVGNSKRMGKVMAGLMKKMQEKHPSVGEIRNIGLFGAI…
LEG_mgen_AAT_NODE_4017_length_3368_cov_15.482567_-_ORF_2_(frame_2)_translation	MLKIANIKPQQLIQTVLQRTFSASHYVSSEEINKSTREYTFFTWSAQKLINPLAVVKAKGCYFWNAEGKRYFDMNSQLMCANIGHGNEKVIKAIQDQAAELAYAHPAFSTRIRAEIGPLLAKHTPGDLKKFFFTLGGAESIENAIKFAKFYTKRNKIMSRFRSYHGATQGAVSITGDPRRWPNEPSLPGTIKLFDPYMYRSHLYEPGMTEDQFSEKIIQQYEEILMYENPEAVAAIVVETVTGTNGILIPPDGYLPRLRKLCTKYGIMMICDEVMSGFGRTGEWFAVDNWKVVPDIMTMAKGLTSAYIPLGCVAINPKIAKEFEYNKFSGGLTYNAHPLCLAASCAVIKFIEEADLVGNSKRMGKVLNGLMKKLQHKHRSIGEVRNIGLFGAIELVKNR…
LEG_mgen_ACAT_NODE_362_length_26914_cov_65.016986_-_ORF_17_(frame_3)_translation	MYSFTNILRRTFSNIVIVNGKRTPVGSFMGQLSSIPAPTLGAIAIKAALNASGVKKNEVDEVFMGNVICAGVGQAPARQASIQADLPTSVICTTINKVCASGMKAVQLGMHSILAGTSNVVVAGGMENMSLAPHFIYMRKGLGFGDGKLTDGILSDGLRDAGSQMLMGACVDKTHKTYKITRQEQDNWSIRSYERAIDATKKGILKNEIVPVSAEVKKGVRATVDKDEECFKFMKDKIPTLKPAFTKDGTVTAANASKNCDGGAAMVLMSEELAKKKNLRPVARIVGFADAAIAPVDFCFAPSFAIKKLLAQTKMTLKDIDFFEINEAFAGTALTNMKLLGIPAEKVNVNGSAVALGHPLGMSGARVVLALINVLQHHKARFGLSAICNGGGGASSILL…
LEG_mgen_ACAT_NODE_3195_length_4410_cov_37.295821_-_ORF_1_(frame_3)_translation	MYSFTNCLRRAFSSVVIVNGKRTPVGSFMGKLSSIPAPTLGAIAIKAALNASGVKKNEVDEVFMGNVISAGVGQAPARQAALQADLPTSVICTTINKVCASGMKAVQLGMHSILAGTSNVVVAGGMENMSLVPHFNYMRKGLGFGDGKLTDGILSDGLRDAGSQMLMGACVDKTHKTYKITRQEQDNWSIRSYERAINATKKGILKNEIVPVSAEIKKGVRATVDKDEECFRFMKDKIPTLKPAFSKDGTVTAANASKNCDGGAAMVLMSEENAKKKNLRPVARIIGFADAAIAPVDFCFAPSFAVKKLLAQANKTIKDIDFFEINEAFAGTALTNMKLLGIPAEKVNVNGSAVALGHPLGMSGARVVLALINILQHHKARFGISAICNGGGGASSILL…
LEG_mgen_ACO_NODE_178_length_35019_cov_33.063711_-_ORF_16_(frame_3)_-_ORF_16_(frame_3)_translation	MLTLLKKIKHYSLQTAIFCFGNVHRQSNLYTLINHCKYIQPTIKEYQQMKTEEGQKPNPFHNIIKTFDIKGKNFQYVSMKDLQDQRYFSLPYSIRILLESAIRNCDQFSIKSSDVERILDWKNTSPQQIEIPFKPARVLLQDFTGVPAVVDIAGMRDVVHDLGKDPSLINPIIPTELVIDHSIQVDSYGELDSKSVNEQCEFERNKERFQFLKWGQRNFKNFLIVPPGSGICHQVNLEYLARVVFIGNENGILYPDSLVGADSHTTMINGLGVLGWGVGGIEAEAAMLGETITMVLPEVVGVRLVGQMPERCNATDLVLTLTELLRKRGVVGKFVEYFGPGVGTLSLADRATIANMSPEYGATMGYFAVDKNTMAYLKQTGRKEENIEIAEAYLRETCM…
LEG_mgen_ACTE_NODE_236_length_31873_cov_75.083570_-_ORF_13_(frame_3)_translation	MINPNMKYVWQKYCSMPIQYGAEFTKLMSLVESDKLIKNHKQEVLFKLNVKDSMNNIFDTMHGGALMTMLDITTTLAISGLDKTMRHTVSIEMAMSFLNAIKSPSNILFHCRIPKIGKSLAFSYCDIYDEKTRVLCATGQQVKIFLNQTWKE
LEG_mgen_AK_NODE_77_length_45294_cov_32.430624_-_ORF_11_(frame_3)_translation	MSLSFKQPLTLLMMGAPGVGKGTFSRFLSRDLKLPELSSGAELRRLIKTGKGELVDEIKRIQNAGKLVDDKIVLKMIAQRLEDPEFARGAILDGFPRTKDQAVAFNKLKQIDLAIKIDLNENILVRKLTGRRECSKCQRNYNIFSIQSDEYDMEPLLPKVEGICDECGGKLIQRSDDNEKTIVTRMETYKKLTIPMEYYFKEIGVPITTFEPRKGVKDYNKFKNLVFQDLSKIH
LEG_mgen_ALDH_NODE_1285_length_11878_cov_31.064760_-_ORF_1_(frame_1)_translation	MIRCNIHNLLSSNFPKRNFSAVPGLQRIVTQLLINGKFVNSKSGKTFKAVNPATEEVIAHVQEADKADADLAIHAAREAFDNGPWRRIDPSQRSRLMHKLADLIEKHGNELAMLDTINQGKPLFFTKIVDVKLAVQMMRYFAGWPDKIHGETVPLDGPFFGYIRREPVGVCGQIIPWNYPLLMATWKLAPMLAMGCTTVLKPAEQTPLSALRLGELIMEAGIPKGVVNIIPGYGPTAGKAIVSSPLVDKIAFTGSTEVGMEIMRTAHTNGLKRLTLELGGKSPLIVMDDADIKSAVKIASDAIFFNNGQVCNAGSRVFVHEKIYDQFVKMKTEATKKRVIGNPLNKGVDHGPLVDQDQLKKYLHYVQKGKAEGAKLETGGKKVGTKGYFVEPTIFSNVT…
LEG_mgen_ALT_NODE_706_length_18828_cov_30.452168_extraction_-_ORF_1_(frame_1)_translation	MHLGYLYKFRMKTVFNLTRRTFSQVLNMETVNQNLTKVVYEVRGGIVLRSEDIGREMAKGVKWPFNQFVYWNIGNPQNLGQIPLSFPREVLGYLYGGIASESCSADARARARTYLPELRKCAPYTYFKGMNIIREKIAKFITDRDNCETRREDILLGNGASAAIKTVLESMLNGQRDAILCPIPQYPLYSGTIQLLGSTLAGYYLNEEKQWEVDIDSLNMVYRNYYDNGFNLKAMVVINPGNPTGNILSEENIKDIIRFCYDHKLVIIADEVYQNNIYSDKKKWVSFKKVLSNLEPPYNQTGLFSFHSASKGSSGECGLRGGYSDMYNIPTKMKEAILKLKELEGCPNVVGQVAVCFR
LEG_mgen_ALT_NODE_706_length_18828_cov_30.452168_extraction_-_ORF_2_(frame_1)_translation	MDLVIDPPNLQTCSADTVALYRKEYQAVANDLKEKARLIHKNLNAMQNITCNEIEGALYAFPRIFLPKSFIDEARSKKLHPDFYYALKLLEGSGILTVPGSGFKEKEGTYHFRLTNLICPKEDMLRSLAKIKEFNDVFFSKYH
LEG_mgen_ASCT_part_NODE_276_length_30293_cov_79.957701_extraction_-_ORF_1_(frame_1)_translation	MKLRNFFLIYIIPDCLFKYSMRNLFYGKNFSSKVFKNAAEAIKDMKPGVRILLGGFGLAGLAENCLNAVSQRKDLKDLEVVCCTAGTTDLGPGLLMKKKQVKRVISSYVGENQSLMKQYLAGELEVELCPQGTLCEKMRSGGAGIPAFYTPTGYGTVISDGGQAIKLKKDGKTPLIKSSPKEVREFNGRKYVMEPTITGDYAFVKGWKGDTKGNVIFRKTARNYNPDCAKAAKCAIVEVEELVQEGQLNPDQIHLPGVYTHRIFQGSNYVKPIEFLTLFKEEAFGKKLSADV
LEG_mgen_ASCT_part_NODE_276_length_30293_cov_79.957701_extraction_-_ORF_2_(frame_2)_translation	MYVNLGIGIPTLVGNYLPKGIQLVIQSENGMLGNGPFPRKGFEDPDLINASKQTTSELPGCCYFSSSDSFAMIRGRKMDITILGSLQISRKGDIANWIVPGKIFKGMGGAMDLVGSGSKVVVVMEHTSKGEPKIFEECKLPLTGKGVVSKLITDMAVFDFHPQRGMILTELFKGVTLEQVKAATACSFEIADNLKTLSF
LEG_mgen_ASCT_part_NODE_1268_length_12016_cov_26.709816_extraction_-_ORF_1_(frame_1)_translation	MLSDCKFIYSMRSLFQGKTFSSKVFKNAAEAIKDMRPGVRILLGGFGLAGLAENCLTAVSQRKDLKNLEVVCCTAGTTDLGPGLLMKNKQVKRVISSYVGENQSLMKQYLAGELEVELCPQGTLCERLRSGGAGIPAFFTPTGYGTVISDGGQAIKLKKDGKTPEIKSAQKEVREFNGRKYVMEHTMTGDYAFVKGWKGDTKGNVIFRKTARNYNPDCAKAAKCAIVEVEELVQEGQLDPDQIHLPGVYTHRIFQGSNYVKPIEVLTLFKEESAGKKLSADV
LEG_mgen_ASCT_part_NODE_1268_length_12016_cov_26.709816_extraction_-_ORF_2_(frame_2)_translation	MEIKNGMYVNLGIGIPTLVGNYLPKGVQLVIQSENGMLGNGPFPRKGLEDPDLINASKQTTSELPGCCYFSSSDSFAMIRGRKMDITILGSLQVSRKGDIANWIVPGKIFKGMGGAMDLVGSGSKVVVVMEHTSKGESKIFEECKLPLTGKGVVSKLITDMAVFDFHPQRGMILTELFKGVSLEQVKAVTPCKFEIAENLKTLSF
LEG_mgen_AST_NODE_1652_length_9363_cov_23.758553_-_ORF_5_(frame_1)_translation	MLANTISRSNAMIAMNVTKSFSSFWSHIPLRPADPIMGVVEDFKKDKNSRKVNLSAGTYKDDQGKPFILNCVKAAKKIILETNIDHEYLPIDGLQSFVNNSLQLAYSPENKALNEGKILGVQGLSGTGSLRIGFEFLSIFYEGNRTVYIPDPTWPNHKNVIARAGLNIKQYRYYDYKKKTLNLSGMLQDLDRAPKASIIVLHVCAHNPTGMDPTESEWNDIYNIIKKRNHFPFFDMAYQGFASGDPVRDSFGLRRFSNEGFRLALAQSYAKSFGLYGERVGCFSMLCESKEEVNRLLSHVKFLARAQYSNPPKYGAHIVDIVLSNPDLKKEWHRELKIMSDRLGLMRKKIYEGLKASGSKVNWDHIVKQIGMFAYTGLTREQVQKLISKHHIYLTDDGR…
LEG_mgen_ATM1_NODE_1346_length_11345_cov_19.851132_-_ORF_4_(frame_2)_translation	MGINAVLDKSSLWKPIRLILMSGAMRVLGLIIQENRNVLLNKITSQVLVDYSKEMMNYLLRLDYLIFKNNSEQVINSFSKSIEGLERFNRFVFGAILSNTVEILIISSLIFSLLGPKYFLNTIISYGIYLYATRKLATYRQKFLKQKYEAELNCDNKLNDVINNIQTVKYFQGEPKESQNFSNLIKILREKDHRVIKSLRMLNSIQAFIITTGMILNFAVGIHDCFLGRLTPGDLVMLQGMFTQMMFPLNFMGMLMREIDETRMNIQYGMEMVAHKKILYEEEEKQKKKLFHFSGGKIEFRNVTFGFPVQSRKIISQNGNENVVLNNFNATFHSKSINAIVGESGQGKSTIFDLLYKLYLPSKGEILVDGQNISHVDVDSYRKVK
LEG_mgen_ATM1_NODE_1346_length_11345_cov_19.851132_-_ORF_5_(frame_3)_translation	MFTSLTQFYSRSINYMLTSYSPIHYHTYNSLKYLNIPSKIFHDSQNHGNMFEKSTNNKSTNKEMKKKTLKSIEQRASLNDIMKFLYPYYNTRYIKKIFLYSFLVTLASKGMITYVNVHDINFISPHTFSSWESTQCLTNLHYGSQLD
LEG_mgen_CBS_NODE_2354_length_6328_cov_30.804225_-_ORF_5_(frame_3)_translation	MIRDAQLKGVLTPGSGTIIEATSGNTGLGLALAGGIAGYKVIITLPEKMSQEKSDVLNALGAEIVRTPTEACFEYENSHAGMARKLQKEIKDSVILDQYVNPANSLAHYDQTAEEIWDQLDGKLDYIILSAGTGGTLMGVARKLKEKNPEIKVIAVDPEGSILATPSSLNSKGIFSYKIEGIGYDFIPKTCEQDYPIVDQWIKTEDKESFIMARRLIKEEGLLVGGSSGSAMLAAVQIAKNLPADKRVCVLFVDSLRNYLSKFVNDDWMLEGGFMNQEDYDAKYFPKSLRIYNGNTAEAIIQDLKLKEITPVTVNAKVGDCLEIFNNNGIECLPVLNDQGKLFGIITSRELTNYLTSYKLEMDDAISKAVIKDFKKVKASDPMKYLSKAFTRHQFVLVE…
LEG_mgen_DnaJ_Jac1-like_NODE_380_length_26263_cov_124.426347_-_ORF_10_(frame_1)_translation	MSFFFNGFPFDMGGGGFSGFEGFEKPNAGPKKDVNTTRLYEILNVAKTANPDEIRKSYRKLAKEKHPDKGGDEKEFQDLQMAYEVLSDENKRKVYDQYGEEGLKEGRADSSGFEGGDLFDLLQGRMGGGGSSGKRKTKSVLHNLNVTLEDVYNGKTRYLEISRYRVCTTCKGSGSKDANANTKCKGCDGKGVKIVIQRLPMGMIQTQQECNDCKGEGYVIKEKDKCKSCKGQKVTKVSKTIEVNIDKGAPDGKRYQFAGESDEVPGYEPGDVVVEITIEKHKKFLRKGADLVYTADLSLLEALTGFELVITHLDGRSIQVKSNPGQVIKPGVLKTVKDCGMPFFEAPYKFGNLFISFNIVFPEKLNDSQKVNLTQVKYIIYPIYTSYSLRLFKNQSQRK…
LEG_mgen_DnaJ_Jac1-like_NODE_2221_length_6779_cov_30.249248_-_ORF_2_(frame_1)_translation	MSFFFNGFPFDMGGGFGGFDGFNEKQSSGPKKDVNTTRLYEILKVTKTATPDEIRKSYRKLAKEKHPDKGGDEKEFQDLQFAYEVLSDENKRKVYDQYGEDGLKEGRADASGFEGGDLFDLLQGRMGGGSSGKRKTKSVLHNLNVTLEDVYQGKTKYLEISRYRICITCNGSGSKDPNANTKCKGCDGKGVKIVVQRLPMGMIQTQQECNDCNGEGYVIKEKDKCKECKGQKVTKVAKMIEVNIDKGAPDGKRYTFAGESDEVPGYDPGDIVVEIIIEKHLKFLRKGADLVYTADISLLEALTGFELVITHLDDRKIQVKSTPGQIIKPGVLKTVKDCGMPFFETPYKYGHLYISFNIIFPEKLNDTQKVNLTQVKVMFNCV
LEG_mgen_DnaJ_NODE_1992_length_7566_cov_32.690415_-_ORF_1_(frame_2)_translation	MLINHTRTILLRHVKEIKIVIQVHKKSLIDFDPRKDYYKILGVKETANENEIKNTFYKLAKMYHPDVNQGKTNEQFKEMSAAYDVLSDPKKRKEYDNYRRKYGYGYGYAPRQSQSQERASYAHERGADEDFDDIFNESRYSEDRFQNYWKKSKYYSDNEKETYRDRKNRKTMSIFLFCTILGYGLFLLLTKENSGDEFRVITPYRKGHLSSEKNKMNH
LEG_mgen_DnaK_NODE_507_length_22865_cov_90.453206_-_ORF_9_(frame_1)_translation	MSKAPAIGIDLGTTYSCVGVWINGKVEIIPNDMGERTTPSYVAFTEAERLVGDAAKNQITRNPTNTVFDAKRLIGRKWGDQVVQEDVKLWPFKVVKEAAGERPQIIIQFQGQERKFFAEEISAMVLQKMKKIAEDYLGKEVKDAIVTVPAYFNDSQRQATKDAGTISGLNVLRIINEPTAAAIAYGLDKKFKSERNVLIFDLGGGTFDVSVLSLEEGLFEVKATNGHTHLGGEDFDNRLVEYCAGEFRRKTGIDLKNNPKALRRVRASCEKAKRALSASTQATVDVDALMEGKDLNLTITRAKFEELCLDLFKKCIPPLDNVLKDSKLSKSEVQDVVLVGGSTRIPKIIQMVTDYFNGKDPNKSINPDEAVAYGAAVQAAVVTNIQDEDIKGVTLLDVT…
LEG_mgen_DnaK_NODE_3123_length_4534_cov_2.849104_-_ORF_1_(frame_1)_translation	MKKISGIPQRLYKPRTQKHLYLMNSNTKAPAIGIDLGTTYSCVGVWLNGKVEIIPNDMGERTTPSYVAFTETERLVGDAAKNQITRNPTNTVFDAKRLIGRKYGESVVQEDIKLWPFKVVKEETGDRPQIVVLFQGQERKFFAEEISAMVLQKMKKIAEDYLGGKDCKDAIVTVPAYFNDSQRQATKDAGIISGLNVLRIINEPTAAAIAYGLDKKFKNERNVLIFDLGGGTFDVSVLSLEEGLFEVRATNGHTHLGGEDFDNRLVEYCAGEFRRKTGIDLKENPKALRRVRASCEKVKRALSASTQAVVDIDALMDGKDLSVSLTRAKFEELCMDLFRKCIPPLDNVLKDSKLSKSEIHDVVLVGGSTRIPKICQMVQDYFNGKEPNKSINPDEAVAY…
LEG_mgen_ECH_NODE_1044_length_14145_cov_17.285276_-_ORF_4_(frame_2)_translation	MNSTKDEVRYVTHNSSCVEIILHNPKKLNATSHEMCLSLAKKLIKFVPQGIKPLKGLTSDDSTSDEDNVIPKTIILTGSAEGKSFCCGGDVKGIYARKMQNDISTVYFNYDLHIFINTCFLKIKPMLQISIWNGYAMGGGLGLSINSPIRIATENTIFAMPEAMIGFFPDVGAAYFLPRLFNNSFALGLFVGLTAYNIKGRECLTSGAATHYVLDKDIPLVKEQIIKLSEEKEIVTAEDVSEVLKSYGECYSPEIFEFKNKQFIEQVFLPDSIFDIFSRLEEIVDNNENIGDEYQSWAKETLAMLNKASPLSLLIFVEFAKLAWNYLSIEENYEMDRKVHARFVEYGDFIEGIRAKLIEKDNDPKWQFKTIHDI
LEG_mgen_ENO_cyto_NODE_322_length_28388_cov_48.358338_-_ORF_2_(frame_1)_translation	MITSVKAREILDSRGNPTIEVDVKLDDGSLHRAAVPSGASTGIYEALELRDGDKSRFLGKGVLKACENVDTIIAPALLNMDPTQQEQIDKLMVETLDGSKNEWGWSKSKLGANAILAVSLAVCRAGAYVCKMPLYAYIAQLAGNPIDKFTMPVPSLNVINGGSHAGNQLALQEFMILPTGASSFKEALRIGAEVYQNLKKVILEKYGLNATNVGDEGGFAPDINDAEEAIQLLEAAILKSGHKDKVTIGMDCAASEFWDEGENKYNLRFKSKNDPLMISGDDLGELYSQWASKYPIVSIEDPFEQNDFESYAKFTEKAQGKFQIVGDDLLVTNPVRVQVGIDKKLCNALLLKVNQIGSVTESIEAYKLARKNGWGVMVSHRSGETEDNFIADLVVGLGT…
LEG_mgen_ENO_cyto_NODE_919_length_15487_cov_46.752214_-_ORF_1_(frame_1)_translation	MGCGQSTAPGAHKLTFHLLHVERISDKELKIVQKHCETLVTAPNKVIADYLSGSCKFQSLFKDQTLVRACVAFLYYLDKSKRICAAHELKTLNPFDQFASNQNKRLDKVYLLDMRTSALSYSDLLKEFSKDPQILNRKITSIESSQTQVISEVIAREILDSRGNPTIEVDIKLDDGSVHRAAVPSGASTGIYEALELRDGEKTRFLGKGVLKACENVNKIIAPKLLKMDPTEQSKIDKLMVETLDGSKNEWGWTKSKLGANAILAVSLALCRAGAHVAKMPLYAYIAKLSGNPIDQFTLPVPSFNVINGGSHAGNQLALQEFMILPTGATNYAGALRIGAEVYHCLKKVIQDKYGINATNVGDEGGFAPEIMNGEEAIQLLATAINKSGHTGKVFIGMD…
LEG_mgen_ENO_NODE_65_length_47509_cov_73.692774_-_ORF_16_(frame_1)_translation	MLIQGFQNSMRRLFMLPSGSFFSSVKKIKSIKAREILDSRGNPTVEVDLTLDDYSLHRAAVPSGASTGIYEALELRDKDKNRYGGKGVLKAVSNVEKIIAPALIGQNAQEQAKLDKLMVEKLDGSKNEWGWSKSKIGANAILAVSMALCRAGAHSAKVPLYEWIARLAGNPTNHYIMPVPSLNVINGGSHAGNQLAVQEFMLLPTGATSFRDSIKMGAEVYQALKKVILEKYGLNATNVGDEGGFAPDISNTEEAFQLLQAALEKSGHKGKVQLGMDCAASEYYEEDTKQYNLLFKNKEKKQLLSKDAMVDLYSQWIEKYRVASIEDPFDQNDFESYSKFTKRNASKTQIVGDDLLVTNPVRVKMAIEKKLCNALLLKVNQIGSITESIEAYQLSKKNH…
LEG_mgen_ENO_NODE_4411_length_3023_cov_6.426796_-_ORF_1_(frame_1)_translation	MLSKGFQSSIRKLFMLPSGSFFSSVKKIKSIKAREILDSRGNPTVEVDLTLDDYSLHRAAVPSGASTGIYEALELRDKDKNRYGGKGVLKAVSNVEKIIAPALIGQNAQEQAKLDKLMVEKLDGSKNEWGWSKSKIGANAILAVSMALCRAGAHSAKVPLYEWIARLAGNPTNHYIMPVPSLNVINGGSHAGNQLAVQEFMLLPTGATSFRDSIKMGAEVYQALKKVILEKYGLNATNVGDEGGFAPDISNTEEAFQLLQAALEKSGHKGKVQLGMDCAASEYYEEDTKQYNLLFKNKEKKQLLSKDAMVDLYSQWIDKYHVASIEDPFDQNDFESYSKFTKRNANKTQIVGDDLLVTNPVRVKMAIEKKLCNALLLKVNQIGSITESIEAYQLSKKNH…
LEG_mgen_FD_NODE_171_length_35524_cov_58.425290_-_ORF_9_(frame_2)_translation	MNMNLMNSLARTYTHKIIDNCLKAYFSENNKVRFSFVYIKDNTEVPVEAKIGQNILEVARMYNIDLEGACDGNCACSTCHVIFENKIFEKLPKATEEEEDMLDLAFGLSSTSRLGCQVKVVKEFHGMKLKIPAETRNLYVDKQKTTEKKIVNKH
LEG_mgen_FUM_NODE_4906_length_2645_cov_37.088959_-_ORF_1_(frame_1)_translation	VIFQTGSGTQTNMNLNEVISNRACEMMGGKRGEKSMVHPNDHVNKSQSSNDTYPAAMHVAVMIDLNKYLLPTLASFKANLERKVKEFDKIIKIGRTHTQDATPLTLGQEFSGYLTQVSSHIEHIKHNIKYLCMLAQGGTAVGTGLNTKKGFDVLIANELAKETNLPFETAPNKFEALATHDALAHFSGTLNSLASSLYKIGHDIKLLSTDLGELDVEDVSPCEELLMACVQTMGNHTAVTLGSNNNIFYIN
LEG_mgen_GCSH_NODE_1529_length_10084_cov_26.315356_-_ORF_1_(frame_1)_translation	MQRYISSLSQIARHHVYYSVLRSFTMKFSKEHEWVKLDQDVATIGITHHAQSELGEIVHIELPKNKTTFKAGDSMGTVESVKTVADIFAPIDGTVLTSNVELSKKPSLMNTSPLKEGWYTKLKVDIEKVKKTIDALMTEEQYAKFLAESK
LEG_mgen_GCSL_part_NODE_861_length_16265_cov_15.432643_-_ORF_1_(frame_1)_translation	MIQIEQMMNKKNRLINGLTKGIEALFIKNKIDHLKGWGKFQDEKTILVEAEPGNGKVYRSKNFIIATGSEPKNLPGGILPTDEKRILSSTGALSLQEVPKKLVVIGGGVIGLELGSIYKRLGSEVEIVEFLDKILPKFDYEISSYFLNLLKKSGIKFSLGHKVVGGSYNGDSIKVLAEDINVWILFIIV
LEG_mgen_GCSL_part_NODE_861_length_16265_cov_15.432643_-_ORF_2_(frame_1)_translation	MIATGRRSFTKGLNLEGLGIKVEKNGKIPVGKSLQTKIPGIYAIGDTVEGPMLAHKGVEEGIAAVEIICGEPGHINHNVIPNVVYTHPELAFVGETEEEIKAKKIEYNKGKFPFTANSKAKSSEEDNGFVKVLADKNTDKILGVHIIGPNAGELIAECVLAMEYGASSEDIGRTCHAHPSLSEAVKEACLATFDKPLNL
LEG_mgen_GCSL_part_NODE_1327_length_11492_cov_107.834228_-_ORF_9_(frame_2)_translation	MNIDQIMNKKNRIVNGLTKGIEMLFKKNKVDHLKGWGKFQDEKTILVETAPGKGKTYRSKNFIIATGSEPNNLPGGILPIDEKRILSSTGALSLQEVPKKLVVIGGGVIGLEIGSIYQRLGSEVEVVEFMDKILPNFDTELSSYFFNLLKKSGIKFSLSHKVVGGSYAGDSIKVVAEDIKVYVIF
LEG_mgen_GCSL_part_NODE_1327_length_11492_cov_107.834228_-_ORF_10_(frame_2)_translation	MGIKLDKQGRIPVGKSLQTKIPGIYAIGDTIEGPMLAHKGEEDGVAAVEIICGEPGHVNHSVIPNVVYTHPELAFVGETEEEIKAKKIAYNKGKFPFLANSRAKATEDFNGFVKVLAEKKTDKILGVHIIGPNAGELIAECVLAMEYGASSEDIGRTCHAHPSLSEAVKEACLATFDKPLNF
LEG_mgen_GCST_NODE_1097_length_13586_cov_46.319860_-_ORF_7_(frame_2)_translation	MKDDHWRNKDVQIEYMGKRSLIALQGPLAAKTLQAYVPNFNLSKLLFMRASFLTIPKISEDVLVSRCGYTGEDGFEISVSSQKAEQFFDLLLKTPDAKPCGLGARDTLRLEAGLCLYGHELDEEKTPIEASLRWIIGKRRAKKV
LEG_mgen_GcvP_NODE_1656_length_9317_cov_43.516322_-_ORF_1_(frame_3)_translation	MDQMKGSKQMIDELSQMLATITQFHSTSFQAKSGAHGELTGLLTIRRYFESIGQKHRNICLIPASSHGTNFASAAFSGLKVVVVATDNHGNVKINDLREKAKLHKDKLCCLMVTYPSTHGVFEEKIKEMTEIVHNNGGQVYMDGANMNAQVLLTSPGTIDADCCHLNLHKTMAMPHGGGGGGSGPICVKKHLTEFLPGHVHINKSPDKNWSTSSAPHGNAGLLPITYMYIKMLGKDIKKSTQIAILNANYMMEKLNGPYKILYRGKNNKVAHEFIIDVRDIKKKTGVSEEDIAKRLMDYGFHAPTISFPVPGTLMIEPTESEDK
LEG_mgen_GcvP_NODE_2333_length_6403_cov_20.343372_-_ORF_2_(frame_2)_translation	MLKVVNSKSLDDLINETIPSTILLPENVKLEQEKILGKPLSEHCALMHLKNITEKNILFKNYIGCGYNPVILPPIISKLILENPAWYTSYTPYQAEISQGRLESLLNFQTLIIELTGLPISNASLLDESTSAVDAMNMAFHITEGKRSSFFISDTMFPFIKDTIRTMAHYLKINIIEGSPDNENILSNPNIFGGIVQNPDNFGRVCDYTEFAKTLKRNGAIPIINIDLLSLQLTKTPAEMGFDIAVGSAQRFGVPMYNGGPYAGFLSAKEEYTRQMPGRIVGISRDILGKPGYRLSLQTREQHIRRNRATSNICTAEALMANMAAFYAIFHGKQGLLEISKRINIFAGFLSTILCKIGYKVLNKTDELFDTVAVDLHNSEITCEKAMSEFSKNKINIRH…
LEG_mgen_GcvP_NODE_5912_length_2148_cov_43.868382_-_ORF_1_(frame_2)_translation	MLKVVKADSLEEFTTAAVPEIIRLPENAKREQEKILGGAISEHTALMNLKEIAGKNTLFTNYIGCGYNPVIVPPIILRMILENPMWYTSYTPYQAEISQGRLESLLNFQTLIAELTGLPISNASLLDEANSAADAMNMAYGILEGARSTFFIAENLFPFIKDTIKTMAHHRNINIIEGNPADESILNNPNIFGGIVQNPDNLGKVSEYSEFAKRLKQNGAIPIIATDISSLLLTKTPAEMGFDIAVGSAQRFGVPMSNGGPHAGFMSTKEEYKRKFPGRIVGISKDKFGNPGYRLSLQTREQHIRRDRATSNICTAEALLANMAAFYAIFHGKEGLIEISKRINLYARFLATHLSTAGFNIIHQPGEIFDTVAIDLKESGLTCQNVLSAFEKKKINIRC…
LEG_mgen_GDH_part_NODE_479_length_23493_cov_80.817898_-_ORF_9_(frame_1)_translation	MRANEALAFLMTMKLSVHHIPFGGAKGCVKIEPSNYSHAELLRLTRRYTLELAKKNFIGPGIDVPGPETGTGEDIMNCMKDTYVTFYGDKDVNSVACVTGKSVSQGGIEGRVESTGLGVFYGLKEVMSNPYISKKYMFKPDIAGKTFIIQGLGNVGYWVSKFIEGAKGKIIGIEEMNSSAFNPDGLDIQMALDFKNKNKTLKGFPGATETYGSDEDYRQVLYRDCDVLIPAAFEKTINKSNAEKINCKILGEASNGPTTLAADEILEKRGILVVPDILLTTGGATVSYFEWLKNLEHQQLGLMIRR
LEG_mgen_GrpE_NODE_3631_length_3825_cov_26.270957_-_ORF_1_(frame_1)_translation	MNTIFRSNLCKQKVIFNTIKMHTFAHNLLLSNTRNGQRSINSIPNQIDCFFNFSASKSINPLSRASRPLMNMNYKSYFSTKEDGRVKEEESEHEDKTEAKSGNAKSTEFKEKADSQDNRQEEDYIALSKYVELKTLFEEQSKKSDMIRKKFEEIKKLYLDNVSETEQIKLRYSQEIKSMKDLALSKFAKDMLDVQDNFSRILSLLKEKEFATLADAGKIETFMSFLNGIKQVKSNLSSTLEKNGVKEYSPHHERFDPNKHEAVYDYQDNMGISGTVGHVLQSGFIIGDRVLRPAKVAVVKKK
LEG_mgen_Grx5_NODE_1171_length_12773_cov_25.783093_-_ORF_7_(frame_2)_translation	MFLYLISNMIALTKIMVKSFHMSEIFKSFQYYPSFTLKHFTKNVEKISISSDSEDTHSDFKPKFKMQITDKNVIQMVDKWVKNNQIVLFMKGTQEAPQCGFSNYVVQVLKFYGLKNIKTINILENHLLRETVKSYSHWPTYPQLYINGTLVGGFDIVKDMHQSGTFEELLKKEGIVFTIKI
LEG_mgen_HIBADH_NODE_1228_length_12335_cov_24.135403_-_ORF_4_(frame_2)_translation	MIRVFPKRFLSHKVTFIGLGNMGHYMSRHLVKAGTTVFGYDVRQDIIDKFVADGGAKYDHVDDAINQSDAVLTILPNFKIVQKVWEMAYKGARKGTMFIDCSTCPPFDIADLAKQAKSRGLVPVDAPVTGAQPGAIKGTLNFLIGVEKEHFQKARDILRPMGKNFFHCGGNSMGQVAKVCNNLCLAINISGLSESIVLGQKFGMDPKLLTEVMNAGSARCWSIDTYNPVPGAVATAPSTNDYKPGFANELMCKDVNIANDAIDKLKIHAPLSRKTKEIYEALKKEVPEKDFSYVYQYVLNKKI
LEG_mgen_HIBADH_NODE_1523_length_10122_cov_156.550775_-_ORF_6_(frame_2)_translation	MMHIYPKRFLSHKVTFIGLGNMGHYMARHLVQAGTTVFGHDIKQDMIDKFVADGGAKYEHVEDAISQSDAVVTILPKFPVVQKVWDMAYKSAKKGTMFIDCSTCSPFDIAGLLKQAKKKGFIPVDAPVSGGQPAAMKGTLNFLVGAEKEHFEKVREILQPMGKKFFYCGGNSMGQVAKASNNLLLAITICALSESIVLGQKLGMDPKLLTEVMNAGSARCWCIDTYNPVPGALSTAPGSNDYKPGFTNELMLKDVNIANDAMDRMKIYAPLTKKTKEMYETLKKEVPEKDFSYVYQYLLNKKI
LEG_mgen_Hsp10_NODE_594_length_20920_cov_73.855865_-_BLAST_Hit_translation	ITTLSPLLNRCLIQKIIPKQISKGGIILPDKATEKEARLGKVIAVGPGERTEKGEIMKPYVKIGDIVLLPEYQGAKVPMADTESEYLIYKDTELLGIIEGFKH
LEG_mgen_HSP60_part_NODE_112_length_39695_cov_53.418116_-_ORF_24_(frame_2)_translation	MKLLFSYSRMLSKIFLNYKPQSSHLLFPSSVKRFFSEGKDIIHGEDCRKKIILGVTKLADTVQVTLGPKGRHVIIDQKFGEPKITKDGVTVAKSIDFNDRYMNLGASLIKQVANRSNNETGDGTTTATVLARKIFIEGCKSISGGMNPMDIRKGILIAVNKVEEYLNKISMKISGKEQLANVATISANNDKQLGQLIADIMTKIGPDGTVTVESGKTVEHAVEYVEGFKFDRGFLSPYFITDFKKQVCEFEKPLILLMEDKLKDSDVQQLVKVLEYAKQTGRPLLIVAEEVEAELLATLIVNKLRNNLRVCVVKPPGYGDNKKDYLQDIAISTGGHIFSEEIGTTLQNADPKCIRIYIYIS
LEG_mgen_HSP60_part_NODE_112_length_39695_cov_53.418116_-_ORF_30_(frame_3)_translation	MTGGVAILKVGGVSETEVNEAKDLINDAISATKCASEQGIVVGGGCALLYAIRHIKDLKGENFDQDNGINIVRQALRYPIMEICNNAGLKGELLAEQLLEGAKERIGIDANTGEKVDMIKEGIIDPTKVVRAEIVGAGRVASLMLTTESMVVNLPKEEKELPAPGMGGMGGMGGMGGMGGMGGMGY
LEG_mgen_HSP60_part_NODE_286_length_29807_cov_20.664724_-_ORF_22_(frame_3)_translation	MKDRIDDAICATKAAAAEGIVPGGGSALLYASRQLKKIKLENFDQQNGVNIVAEALKQPCVAICDNAGLSGVLIANQLLEQPNENLGMDAQTGEKCDMIKSGIIDPTKVVRACIVGAVRVASLMLTTEAMVVDEEKKEEKKAAKPQVGGMGSGDELDY
LEG_mgen_HSP60_part_NODE_286_length_29807_cov_20.664724_extraction_-_ORF_2_(frame_1)_translation	MMLSTIRFNSLTSGSLGILPHSLKMNFSGKEIVHGEKARKYMLMGVNKLADVVQVTLGPKGRNVILDQAYGDPKITKDGVTVAKQIEFSNKLINLGASLVKQVANRTSSEAGDGTTTATILAREIFKQGCKSVTSGMNPMDIRRGMILAVEKIEEYLKAKSKKISSKEDLTQVATISANNDKEVGQLIASIIEKVGTEGTINVQTGKTLVHEVEYVEGLKFDRGYISPYFITDAKTQKCEYDNALVLVMENKVTDIQALAKILEYAVVKQKPLLIICEDVESEALAMLIINRLKVGLKVCAVKSPGFGDNQKNMLSDIAISTGATVLSEEIGLTLQNALPDSKIYFHIIL
LEG_mgen_HSP60_part_NODE_1174_length_12742_cov_78.553151_-_ORF_2_(frame_1)_translation	MKDRIDDAICATKAAAAEGIVPGGGSALLYASKQLKKIKLENFDQQNGVTIVAEALKQPCVTICDNAGLSGILIANQLLEQSNENMGVDAQTGEKCDMIKNGIIDPTKVVRSCIVGAVRVASLMLTTEAMVVDEVKKEEKKGAKQQQAGGMDELDY
LEG_mgen_HSP60_part_NODE_1174_length_12742_cov_78.553151_-_ORF_5_(frame_3)_translation	MMLSKIRFNSLSASTLGIFNFMKMNFSGKEIVHGEKARKYMLIGVNKLADTVQVTLGPKGRNVILDQAYGDPKITKDGVTVAKQIEFSNKLINLGASLVKQVANRTSIEAGDGTTTATILAREIFKQGCKSVTSGMNPMDIRRGMLLAVDKIEEYLKSRSKKISSKEDIAQVATISANNDKEVGQLIASIIEKVGTDGTINVQTGKTLVHEVEYVEGIKFDRGYISPYFITDAKSQKCEYDNALVLVMENKITDIQALAKILEYAVNKQRPLLMICEDVESEALAMLIINRLKAGLKVCAVKSPGFGDNQKNMLTDIAISTGATVLSEEIGLTLQNAQPDSKFLFIIFYSRTSRCR
LEG_mgen_Hsp90_NODE_455_length_24104_cov_45.354298_-_ORF_19_(frame_3)_translation	MNTPTDTDTFNFNADINQLLSLIINTFYSNKEIFLRELISNASDALDKVRYMSITDPSVLRNEEKLFIRIIPDKTNNTITLWDSGIGMAKADLISNLGTIARSGTRQFMELLNAGADISMIGQFGVGFYSSYLVANKVVVISKSNDDDQYRWESIANSTFVVTKDVILEDGSNSIGRGTKVILYLKDECIEYLEERKLKDLIKKHSEFISFPIELWVEKSTEKEVEDDDEEEKKEGDEPKVEDETKKDKKKKKIKEISHEFERVNNTKPLWLRKKEDIKKEEYANFYKSITNDWEEHLSCIHFTMEGNLEIKGILFVPKRAPFDLFEAKKKKTNIKLYVRRVFIMDDCDELIPEYLGFVRGVIDSDDLPLNISRETLQQNKILKAIKKAVTKKCIEMFF…
LEG_mgen_Hsp90_NODE_1028_length_14343_cov_20.335186_-_ORF_3_(frame_3)_translation	MTSEADTFNFNADINQLLSLIINTFYSNKEIFLRELISNSSDALDKVRYLSITDPSVLRNEEKLFIRIIPDKTNNTLTFWDSGMGMTKADLISNLGTIARSGTRQFMELLNAGADISMIGQFGVGFYSSYLVANKVVVISKHNDDEQYRWESIANSTFLVAKDVILEDKSNAIGRGTKVILYLKDECIEYLEERKIKDLIKKHSEFISFPIELWIEKSTEKEVEEDEDEDQKDKDKDKDEPKVEDESKKEKKKKKIKEISHEFERVNNTKPLWLRKREDIQKEEYSNFYKSITNDWEDHLSCIHFTMEGNLEIKGILFVPKRAPFDLFEAKKKKSNIKLYVRRVFIMDDCDELIPEYLGFVRGVIDSDDLPLNISRETLQQNKILKAIKKAITKKCIEM…
LEG_mgen_Hsp90_NODE_2073_length_7221_cov_4.986186_-_ORF_4_(frame_1)_translation	MNTPTDTDTFNFNADINQLLSLIINTFYSNKEIFLRELISNASDALDKIRYMSITDPSVLRNEEKLFIRIIPDKTNNTITLWDSGIGMTKADLISNLGTIARSGTRQFMELLNAGADISMIGQFGVGFYSSYLVANKVVVISKSNDDEQYRWESIANSTFVITKDVILDDGSNAIGRGTKVILYLKDECIEYLEERKLKDLIKKHSEFISFPIELWVEKSTEKEVEDDDEEEKKEGDEPKVEDENKKEKKKKKIKEISHEFERVNNTKPLWLRKKEDIKKEEYASFYKSITNDWEEHLSCIHFTMEGNLEIKGILFVPKRAPFDLFEAKKKKSNIKLYVRRVFIMDDCDELIPEYLGFVRGVIDSDDLPLNISRETLQQNKILKAIKKAVTKKCIEMFF…
LEG_mgen_IBD_NODE_69_length_47303_cov_60.392509_-_ORF_26_(frame_3)_translation	MYIMASSKHLSCLKFGKRLYNILIESSMLTPAQKEIQINAYNFAKKELAPYAMIWDAKCTFPRSALQRAASLGYTSIYCNKSHRGMGLGRLEASLIFEGLATGCVASASYLAIHNMCSWIIDTYGNEDQKKKFLPRLYSLNSNVSFCLTEPLAGSDATALKTVAKEDGDYFIINGSKALVSGDSDILIIFCITDEKKEEISALIIEKEPNLGNGLTIGKTERQLGWNIQPTRLVQFKNLRISKANLIGYKGEGFKIATSALLGGRINISSCSLGGAAFCLNQVKEYTQNRKQFGKKISSFQNTQFKFAELAANLHGCRLITRFAASSIDTQNPDTLTYSAMTKLFVPERCFNIANETLQLLGGYGVLREYQVERVFRELRMHMIAGGTVEVMKMLVARN…
LEG_mgen_IscS_2_NODE_108_length_39859_cov_13.047569_-_ORF_22_(frame_2)_translation	MFVNNEVGVIQPIKKIGEICRKNKIFFHTDAAQAIGKIPINVNDLNIDLMSISGHKLYGPKGIGALYIRRKPRVRLTPILNGGGQERGFRSGTLPTPLCVGIGRAAQLAAEEMEYDNTHISRLSQKLYNKLKENIKEIYLNGDPIARYPGNLNISFAYVEGESLIMAVKELAVSSGSACTSASLEPSYVLRALGVDEELAHTSLRIGIGRFTTEEEVDIAAELIIKAVNRLRQLSPLWEMVQEGIDIKTIKWAHH
LEG_mgen_IscS_NODE_108_length_39859_cov_13.047569_-_ORF_21_(frame_2)_translation	MLGFKNILLQSCKSHQSFSFSFKFSSCVLPSLNIGAISKSEAGKQTIFFDFQSTTPLDPRVLDSMIPYLTVRFGNPHSKSHDYGWEAEKAVETARERVAKLIGAESKEIIFTSGATESNNLALKGVADFYKDKKKHIIATQTVCNIYLLYIYHL
LEG_mgen_IscU_NODE_161_length_35944_cov_36.994249_-_BLAST_Hit_translation	FKMLSMTKNVLTRTPFNVVKLYHSKVIDHYEKPRNVGTLPKNDPTVGTGLVGAPACGDVMKLQIQVNDKDVIEKAVFK
LEG_mgen_MDH_NODE_185_length_34566_cov_106.436162_-_ORF_15_(frame_3)_translation	MNMIDIPEMEPRLQGVKMELEDSAFPLLAKLTTTSKLSVGFKDIDIAFLVGSRPRTKGMERSDLLKVNGKIFVEQGKALNDHAKRDVKILVVGNPVNTNCLILMKNAKNLKPSCFCGMTRLDHNRSLAQLSMKTKSPVTSLSKVAIWGNHAGTMFPDLSNAMVNNKMALDIVGREWYEKTFIPTVAQRGSEVIKARNASSAGSAATAAIDNMRDWVNGTQEWVSMAIPTDGKLYNIPKDLVFSFPCTTQKGNYFPVKGLQLDSFAQKKIKATTEELLAERKEVENMLI
LEG_mgen_MDH_NODE_525_length_22411_cov_28.219036_-_ORF_6_(frame_2)_translation	MIDIPPMEPRLVGVKMELDDCAFPLLNKITTTSKLSVGFKDIDAAFLVGSKPRSKGMERADLLKANGAIFVDQGKALSDYAKRDVRVLVVGNPANTNCLIAWKNAKTLKPTCFSAMTRLDHNRSLAQLSMKTNGPVSAIEKFTIWGNHAASMYPDLHNTTVNGKKALSLVPREWYEKTFIPVVAQRGAEIIKARGASSAASAANAAIDCVRDWVKGTKGWVSMAIPTDGKFYNIPKDIVFSVPCTAGKGEYHPVLGVKFDEFSKKKIKVTTDDLLSERKDVEHLLI
LEG_mgen_ME_NODE_1297_length_11783_cov_21.987989_-_ORF_5_(frame_3)_translation	METTDSSKIFDYENILRHHMGLFDIKIKNTVRDMDNLALTYTPGVAASCLEIQKDIRKAYRYTNKGNSVLVLTDSSGFEQVCNGEKWDNNAVMPYLEAFCVNYKLVANIDAYPIIVDFSSIKSPEDFIETINGVMPGYSAVEFWNVCPERLAGYYELLAKDSVYNKTYATIDTKNKRKLDEYFESLGVLFTSNTFYAAIIRAALDTHCKENLNDLAAHVLGLIKEGKISLDKSNLYRSLTEVLSHAVDYILENNLHDTTLDEFNLDKEPTSKKYVMEKYKKFLKFGGKSWIDTFPNNYYFPQHKNDENSLLCHARLKGVIELSPKLQLHDPYDLYEIFSWKNLDKISNIILENPEEVMNLTCKNNLAAIITNGTAILGLGNIGALPGLPVMEGKSVLFR…
LEG_mgen_MMC_NODE_195_length_33929_cov_32.090498_-_ORF_18_(frame_1)_translation	MDNLKMAWNNGISGSKAMAIEVISLMPMRTLIIYQYNHGTSFLETISLLYSQGGLKRFYSGLVPALISGPLSRFTDTSINTFVLDYFSKYSLPIFLKTAIVSIASGMIKILLTPFDTWQAMYQVQGLRGRHILLWKLKHIGVSALFHGASAQFLSSIFSNYPWYVTHNYLYKYFYPPHPRTSPGSSCTNTKGYTIKGIVTDAFIGFFASVNSDIISNSMKVVKTAKQTCAEECSYRELIMRIIKKDGLRGLFFRGINASIISNGLQGLMFNVLWKHFAQEKEIETF
LEG_mgen_MMC_NODE_473_length_23674_cov_52.060347_-_ORF_5_(frame_2)_translation	MEDLKRAARSGFSGYKAMTIQVCSLMWLRTIMNYQYKYGTPIRKTISILYNQGGITRFYAGLLPALIQGPVSRFGDTFANSLALGLMKNKNFPIFLKTLFASMTAGAMRIFLTPIDTLKTMSQVEGKEARRILVAKIKANGMGALYHGSVANALGTFIGHYPWFVTHNYLNKYIPISKDPFWNTIRNACIGFTCSMVSDTTSNFMRVIKTARQTAEKKSSYLTVVKGIVQKDGVHGLLFRGLGIRLFTNGIQGLLFNILWKYFDRAKNTNANSHRK
LEG_mgen_MMC_NODE_2192_length_6848_cov_61.480881_-_ORF_1_(frame_1)_translation	MLIYFTYFMEIFNKAWKSGTSGYKAMILEVGGLMWLHTIMNYQYKHGTSIRQTMQILYQQGGIRRFYSGLGYSMINAPLIKFSDTFTNTLTLMLLDGTKVPLFAKTAIVSTLAWGVKLFLMPIDTIKTMYQVNGDKALGIISQKISTNGISVLFHGALANSFSSIIGHYFWFVTHNYLDHYLPKSTNRLHTLMRNAVIGFSSSFMSNAFSNIFRVIKISRQTSEENNTYLEVIKSITRKDGILGLFFRGIEVRFLASGIQGLLFNVLWKYFDGKHAK
LEG_mgen_MMC_NODE_2584_length_5622_cov_30.987625_-_ORF_3_(frame_3)_translation	MIVNTYYILYFKIYFTCFMEIVNKAWKSGTSGYKAMIIEVGGLMWLHTIMNYQYKHGTSIMQTMKILQQQGGVRRFYSGLGYSIINAPLIKFSDTFSNTLTLMLLDGSKVPLFAKTAIVSTLAWGVKLVLMPIDTIKTMYQVNGDKAIGILSQKISMNGISVLFHGALANSFSSIIGHYFWFVTHNYLEHYLPKSKLQVNTLMRNAVIGFSSSFMSNVFSNIFRVIKISRQTSEENNSYIEVIKSITMKDGIIGLFFRGIEVRFLACGIQGLLFNVLWKYFDSKHVK
LEG_mgen_MMSDH_NODE_410_length_25549_cov_96.807922_-_BLAST_Hit_translation	LILNMLRSANAFKKSIINFSCIARFSSKVLPSFIKGEFIHSPVLPNFINGEFVQSKATKVYDIRDPSTGELINQTPETPKTEFDAAVAAAKKAYIKWRDTPQLTRQRYMFDLLEAIKERQVNISYL*LL*YDIEKCISYEHGKNIPDSKGDIIRGIEVVEQSCNLAVTMMGDTIENVSRGIDMHYHRYPLGVCAGITPYNFPFMCPLWMFPISIVCGNTFVLKPSERVANSSMMLAQILKDIKLPKGVFNMVHGGKDTVNNICNHPDIKAISFVGSTPVGEHIWKTGTANGKRVQANLGAKNHAVLLPDADKEEALNALIGAVYGSSGQRCMAISVIVCVGEV
LEG_mgen_MMSDH_part_NODE_410_length_25549_cov_96.807922_-_ORF_1_(frame_1)_translation	MMGDTIENVSRGIDMHYHRYPLGVCAGITPYNFPFMCPLWMFPISIVCGNTFVLKPSERVANSSMMLAQILKDIKLPKGVFNMVHGGKDTVNNICNHPDIKAISFVGSTPVGEHIWKTGTANGKRVQANLGAKNHAVLLPDADKEEALNALIGAVYGSSGQRCMAISVIVCVGEVLIDILIY
LEG_mgen_MMSDH_part_NODE_410_length_25549_cov_96.807922_-_ORF_4_(frame_3)_translation	MDGRNIKVEGYPNGNWLGPTIIEVDPSSAAYKEELFGPVVCVMKVDTLNDALDLINRNENGNGTAVFTKSGSNARKFQKEVQAGQIGINIPLPVPLPMMSFTGNKNSFRGDLNMYGKGGILFNTQVKTVISRWKNEEEW
LEG_mgen_MPPa_NODE_1480_length_10413_cov_23.718452_-_ORF_3_(frame_1)_translation	MGLLINVGARDEKDSSSGSCLALKLSYLNAARHTSVNDNYRMIQMSGGSTEMEYDEENMWYSTHCFDYDAMDMFKFLADAAFEPRSPIAALEAKEKCWKFLKQQDQLLQMNPFGRSHQKMLTTAYGYNTLGMPKWGVVRNINKITAKMLNDFKNETITSDKVIIVANGVKKHDEFLHVVQDSLAGHKLARERISQREKAVYLGGESRTSMETPETNILLAFQGVPWSHPLMTAYGLIHTMFGGAQGFSVGGPGKGMLNRAYRHSKSIIN
LEG_mgen_MPPb_NODE_2682_length_5403_cov_33.628127_-_ORF_2_(frame_1)_translation	MNLNLWSTLSEFHLVSFFNSIIKKEYSFSQSELFINYFPPIIFVEMIVPNMTNLLKWSIFKPSWAKDLNKITLRRYSHNCKELLRITNPSKYFSQFSKAVLNNNYGGDLPPGEIPEPLKYIRPFEMSVLKNGIRVCTERLDSPLCAVGVFVDSGSRYEKPNTSGTAHFLEHILFKGTKNRSKAYFEKEIEQMGATLDAYTSREHTLFHMQCFSKDKGHCLSILADMLRNPLLQKNQITEEKDTIKTELEECNKDMQELIMEAGHFCAFRNNSMGEPILGEVDNINNVTQDMVKDFHMTHYVGKNFIVVGTGNVNHDEFVSMVAQEFGQVNKDSPNGMERLKMEKPLFLPSVTYIRNDNVENSGIGIFFNAPTWYHEDYYSFLLMERVIGQYDIEKHGPA…
LEG_mgen_NODE_595_length_20813_cov_33.364788_-_ORF_14_(frame_2)_translation	MIRDAQLKGVLTPGNGTIIEATSGNTGLGLAMAGGIAGYKVIITLSEKMSQEKSDVLNALGAEIVRTPAEAGFEYENSYAGMARKLQKEIKDSVILDQYVNPANSLAHYDQTAEEIWDQLDGKLDYIILTAGTGGTLMGVARKLKEKNPEINVIAVDAEGSILATPSSLNSKGIRAYKIEGIGSDFIPKTCERDYPIVDQWIKTEDKESFIMARRLIKEEGLLVGGSSGSAMCAAVQIAKNLPADKRVCVLFVDGLRNYLTKFVNDDWMLEGGFMNQEDYDAKYFPKSLRIYNGNTAEATIQDLKLKEIIPVTVNTKVGDCLEIFNNNGIECLPVLNDQGKLFGILTSRQLTNYLTSYKLEMDDAISKAVIKYFKKVKASDPMKYLSKAFTRHQFVLVE…
LEG_mgen_OGDH_E1_NODE_31_length_55051_cov_38.129725_-_ORF_7_(frame_3)_translation	MLSSIKRSHKFFYQNGLKLFPKIFFSRVNDNFLAGENITYLENLFQSWKRNPKSVNISWQDYFSTLDQDKPASSSIKQPKSSKITQPITPFTDVSGSLKVTLLIRAFQTYGFLKSTLDPLHLPRQVEKFKLYKNIENLKYQTFGLTDDDLEKEFYVKSGNYTGILSESKPIKLKDIIDRLKKSYCSSIGVEYMFNHSFKMCNFIREKFENEWINHILRKDDKINLYKRLAWAVLFEDFLQKKFTTHTRFGLEGLETVISGLKNFVDTAADLGIKDLTFGMPHRGRLNVLANVFEKPYRKIFAEFNGKHEKAGVFNFSGDVKYHLGSFTQRKYPGGKTISLDLLPNPSHLEAVNPVVMGKVRAKQHFEKDIEHTAFKGILLHGDAAFAGQGIVYESMEMS…
LEG_mgen_OGDH_E2_NODE_1519_length_10147_cov_24.030040_-_ORF_3_(frame_1)_-_ORF_3_(frame_1)_translation	MAKKSAREKEINLSEIEGTGPKGRIIQADVLEKEKKKEKEKEKVKPKEAPKPKAAVPLPAIAEYEDVELNNIKKITAERLLLSKTSIPHFYVSSELNMDKIMNLRAELNKYSPSKLTVNHMIIKAAALACTKVPEANASFHRDFIRKYKNVDMSVAVQTDNGLITPIVFSANSKGLGQIAKEMAELQDKAKKRKLKPQEFQGGTFTISNMGMYGIDFFSAVINPPQVCILAIGKTARKVVEDEKAKDKANPFK
LEG_mgen_P5CDH_NODE_1525_length_10101_cov_46.353519_-_ORF_1_(frame_1)_translation	MMSSIIKTASNVSKSANIGLVNSLKFFSVKLKDFSAYDPNAKHLGKLQNYVNGTWRSTRRYDEFLDPLHGHKFMTVPVTQQDEMGDIVEAMNSCPKSGLHNPFKNVERYLMYGQICRRAAEALNTDEVFNHFVKLIQRVFPKSIQQSAGEIKLIRIFFENFCGDNVRFLARGFNNPGDHLGQQTAGYRWPFGPVLLVSPFNFPLEIPVLQLMGALFMGNKVLTKAATKTAVCLEEFIRFLHACGLPKDDVILLHTNGRGIDELIPRIDLRMTCFTGSNDVAENLVRLTKGKIKIEDSGFDWKILGPDVSKDELEYVAHVSDQDAYAISGQKCSAQSLLICHSNWVKSGILEQIKAFAERRSLKSLTIVPTLSLTTKKIQDHVDNLLKIPGAKLLFGGPL…
LEG_mgen_PDH_E1a_NODE_43_length_51874_cov_79.164261_-_ORF_20_(frame_2)_translation	MEEGLTKEDCIITAYREHCNVLARGDTTYQILAEMMGKATGSVQGRGGSMHYYNKKNNFYGGHGIVGAQLPLGTGLAFALKYLKKKNACFAMYGDGSANQGQLYEASNMAGLWNLPVVYVIENNHYGMGTAEARSSFFRPLMAKFRGFPGLICDGMDVFTVREAVRFAKNYALTNGPLFLEIDTYRYQGHSMSDPGITYRTKDEVADWRKSRDCIDRAKDYLFQNNLASESEVKKIEKAIRAKIEKEVEMMRNDPMPHPNELFEKIYVEKSLPFIRHVEYQDSIFNEHKA
LEG_mgen_PDH_E1b_NODE_45_length_51609_cov_23.329125_-_ORF_32_(frame_3)_translation	MGEEVAQYQGAYKVSKGLYQKYGSKRIWDTPISEMGFAGIGVGASMYGLRPIIEFMTWNFSLQAMDQIINSCAKSHYMSSGDLSCPVVFRGLNGAASGVAAQHSQDFSSWFASVPGLKVISPWNVEDCRGLLKAAIRDDNPVIFLENEIMYGKSFPRDEKVMSKDFVLPIGKAKIEREGKDVSIITFSRMVGESLQVANKLQEEGISVEVINLRTLRPMDRTTVLNSIRKTHRVVTVEEGWPTCGIGAEICAIIMESIYKNIYN
LEG_mgen_PDH_E1b_NODE_1450_length_10640_cov_25.243032_-_ORF_7_(frame_3)_translation	MGFAGIGIGASMYGLRPIVEFMTWNFALQAMDQIINSCGKMHYMSGGQLSCPIVFRGLNGAAAGVGAQHSQDFSSWYASVPGLKVIAPWNVEDCRGLLKASVRDDNPVIFLENEIMYGKSFPRDEKVLSKDFVLPIGKAKIEREGKDVSIITFSRMVGESLEAAKKLQEEGISVEVINLRTLRPMDRTTILNSVRKTHRVVTVEEGWPTCGIGAEICAMIMESISKI
LEG_mgen_PDH_E2_NODE_1519_length_10147_cov_24.030040_-_ORF_3_(frame_1)_translation	MAKKSAREKEINLSEIEGTGPKGRIIQADVLEKEKKKEKEKEKVKPKEAPKPKAAVPLPAIAEYEDVELNNIKKITAERLLLSKTSIPHFYVSSELNMDKIMNLRAELNKYSPSKLTVNHMIIKAAALACTKVPEANASFHRDFIRKYKNVDMSVAVQTDNGLITPIVFSANSKGLGQIAKEMAELQDKAKKRKLKPQEFQGGTFTISNMGMYGIDFFSAVINPPQVCILAIGKTARKVVEDEKAKDKANPFK
LEG_mgen_PDH_E3_part_NODE_1327_length_11492_cov_107.834228_-_ORF_9_(frame_2)_translation	MNIDQIMNKKNRIVNGLTKGIEMLFKKNKVDHLKGWGKFQDEKTILVETAPGKGKTYRSKNFIIATGSEPNNLPGGILPIDEKRILSSTGALSLQEVPKKLVVIGGGVIGLEIGSIYQRLGSEVEVVEFMDKILPNFDTELSSYFFNLLKKSGIKFSLSHKVVGGSYAGDSIKVVAEDIKVYVIF
LEG_mgen_PDH_E3_part_NODE_1327_length_11492_cov_107.834228_-_ORF_10_(frame_2)_translation	MGIKLDKQGRIPVGKSLQTKIPGIYAIGDTIEGPMLAHKGEEDGVAAVEIICGEPGHVNHSVIPNVVYTHPELAFVGETEEEIKAKKIAYNKGKFPFLANSRAKATEDFNGFVKVLAEKKTDKILGVHIIGPNAGELIAECVLAMEYGASSEDIGRTCHAHPSLSEAVKEACLATFDKPLNF
LEG_mgen_PEPCK_NODE_237_length_31860_cov_85.227965_-_ORF_3_(frame_3)_translation	MNLKFPILFPLSNLIFIMFRKVFKPNDYDFLYKIMVSRTIQSISQKWFSSSCSAGITCCLRQHTQNEKLISWIEENIKLMKPDKVHFCDGSEEENQLLIQRMVHSGTFIPINPEIRPNSYLARSNTKDVARVEEFTLICSKKKENAGPTNIWADPVKQKEKMTKLYDGVMKGRTMYIIPFSMAPIGSPFSQIGIEITDSPYVVVNMRIMTHGMGKRAIESLGETGNFIPALHSVGAPLKPGQEDVPWPCNEKEKWIVHYPETKEIWSYGSGYGGNALLGKKCFALRIASKMGLEDGWLAEHMLILGVTAPWGKKYYITGAFPSACGKTNLAMLLPTIPGWKVETVGDDICWMRVGSDGRLWAVNPEAGCFGVAPGTSMKSNPNCMGSLKKNCIFTNCAM…
LEG_mgen_PEPCK_NODE_2609_length_5574_cov_48.547274_-_ORF_5_(frame_2)_translation	MIFIYKIMLSRTAQSISKMCFSSACSSGVAACLRKHTSNEKLINWIEENVKLMKPDRIHFCNGSEEENQLLIQRMVHAGTFIPINPEIRPNSYLARSNTKDVARVEEFTLICSKKKEDAGPTNIWADPAKQKEKMVKLYDGVMKGRTMYIIPFSMAPIGSPFSQIGIEITDSPYVVVNMRIMTHGMGKRALESLGETGNFIPCLHSVGAPLKPGQEDVPWPCNEKEKWIVHYPETKEIWSYGSGYGGNALLGKKCFALRIASKMGLEDGWLAEHMLILGVTAPWGKKHYITGAFPSACGKTNLAMLLPTIPGWKVETVGDDICWMRVGSDGRLWAVNPEAGCFGVAPGTSMKSNPNCMGSLKKNTIFTNCAMTTNGDVWWEGMTDEVPEFCTSWLRTEH…
LEG_mgen_PGM_NODE_515_length_22731_cov_61.098611_-_ORF_9_(frame_3)_translation	METQSAVYKIVFVRHGESVWNKDNRFTGWTDVDLSEQGVKEAYEAGKKLEGYQFDVCHTSVLKRAIKTWNGIADVIDHHHIPVKKHWRINERHYGALQGLNKAETASKHGEDQVKIWRRAYDIAPPKLEKTDERFPGNDSKYALLPADVLPFTECLKDTVERVLPYWQDCIAADILSGKKVIVCAHGNSLRAIVKHLDNLANDEVINLNIPTGLPLIYELDKDLKPVKHYYLATDDEVKAKIEAVAAQGKAK
LEG_mgen_PGM_NODE_1128_length_13263_cov_30.527406_-_ORF_5_(frame_1)_translation	MGCGGTKIKLDEKLEKNHLQGNYKIVFVRHGESLWNKENRFTGWTDVDLSEKGFLEAADAGKRLNGYKFDVCHTSVLKRAIKTWNCIADGIDHHHIPVCKHWRLNERHYGALQGLNKSETAQKHGEEQVKIWRRAYDISPPELETSDTRYPRNDKKYRQLPEDVLPKTECLKDTVERVLPYWYDHIAADIIEGKKVIVCAHGNSIRALIKHLDGLSNEEVINLNIPTGLPLVYELDKNLKPLKHYYLATDEEVKAKVEAVASQGKAENKKK
LEG_mgen_PGM_NODE_1211_length_12457_cov_37.998459_-_ORF_7_(frame_3)_translation	MSHLIIFLYFISRMLQIGRRYFACCASAVKTYKVVFVRHGESSWNKENRFTGWTDVDLSNEGTKEALDAGQRLKGWKFDVCHASVLKRAIKTWNAIADVIDYHHLPLYKHWRLNERHYGALQGLNKSETAEKHGEKQVKIWRRAYDIAPPPLELTDPRHPINDPRYSLLPQDILPQTECLKDTVERVLPYWQDHIVADILSGKRVIVCAHGNSLRAIVKHLDNLTNEQVINLNIPTALPLVYELDKSLKPIKHYYLATDEEVKAKIEAVASQGKAKH
LEG_mgen_PGM_NODE_1470_length_10501_cov_32.028533_-_ORF_4_(frame_3)_translation	MLQIGRRYFACCASAVKTYKVVFVRHGESSWNKENRFTGWTDVDLSEEGTKEALDAGKRLKGWTFDVCHASVLKRAIKTWNAIADVIDYHHLPIYKHWRLNERHYGALQGLNKSETAEKHGEKQVKIWRRAYDIAPPPLEFTDPRHPINDPRYSLLPQDILPKTECLKDTVERVLPYWQDHIGSDILSGKRVIVCAHGNSLRAIVKHLDNLTNEQVINLNIPTALPLVYELDKSLKPIKHYYLATDEEVKAKIEAVASQGKAKH
LEG_mgen_PhoE-like_NODE_173_length_35505_cov_53.301148_-_ORF_19_(frame_2)_translation	MLKYYFNNYLYNIIYLFMGQTSSKSKFFVFGGIFVASSYFWLKPVWRKLSLSMLISAEDVIKKTRRPKRIILIRHGESEAHLDTSVFVHTPDNQISLTGNGIKQSEEAAITLKKIIGTESVKFFVSPYKRGKQTSDILMKHFKDNVTDEVIDPRLREQEWGNFKNKDPSVVAAAFAERKKVGKFFYRFLYGESGADVYDRVSLFLESIFRDMRYFNKASFENYVIVCHGLTMRLFTIRFLHLPTSSYETMVPPGNCEYWMFETDENGSYKMTVKYKENDTNISD
LEG_mgen_PhoE-like_NODE_1043_length_14157_cov_64.104847_-_ORF_9_(frame_3)_translation	MGQATSSQKFLIFGGGLFVASSYFWLKPAFRKLSVAMFNAARQEIKLTRRPKRIILIRHGESEANLDTLVYTHTPDNQISLTDAGKKQAEEASVALKKIIGNESVKFFVSPYKRGQQTFEILLKQFKDNKTEQIIDHRLREQEWGNFKDKDPSVVSAMFAERRKVGRFFYRFLNGESGADVYDRVSLFLESIFREMRYFNQKPFENYVIVCHGLFMRFFTTRFLNLPITKFDTMACPTNCEYWMFEKEETGSYNMTIKYRIDENSSD
LEG_mgen_PRDH_NODE_393_length_25950_cov_52.985981_-_ORF_16_(frame_2)_translation	MKQNNVGRIFASLPIMQLLRLKTFFVACKFPTMIDHRAGIHKWSSRIVGKRMTNWVVKKMFADIFTGGENIKELEKCLNSIKKIPKSCAIVDYGRENFKKEEEKDVDPIIKSYNESIDIAEKVDNNNSIAIKITGLADVADLKKVNVIQYFLSLVEDGILNQNSFEKIKIQVEKQKLPCKFTEEIFEKIKAFKVSTFGLSLYELILDDNMQFKELLKLCANVNEKDYSEIKTFCVKLNERLMKIFNHGKQKNALVMIDAEQTYLQYFIDYLTAYYITIFNKDFSIVGATVQSYLKNEPHFLKKFTKFCSENRLKFGLKITRGAYMIEENRLAQKMGVESPICSSLENTHANFNNSLKSLFENYKDGDKVRIHM
LEG_mgen_PRX_NODE_30_length_57405_cov_65.237456_-_ORF_3_(frame_1)_translation	MEPKCSKCEKDCCCLSYCPKAVLGKPAPEFKGIAWKDGDMSEIKLSDYKGKWVVLFFYPLDFTFVCPTEICNFSDMNDSFQNVNTVVIGCSVDSAFCHREWALKDRKLGGLSPLSIPLLSDLSKQISMDYGVLADDGPNKGVAFRATFIIDPKGILRQYSVCDLQVGRNVDEVLRLVQAFQHVDTHGEVCPAKWKPGAKAMVPKLESQELKQFFEEELAKK
LEG_mgen_SCSa_NODE_274_length_30393_cov_26.575861_-_ORF_5_(frame_1)_translation	MKSLLYNTSKFMFSSTIPYVFVNKDTKVITQGITGKQGTFHTQKAIEYGTKMVGGVSPAKAGTFHLGLPIFKNCREAREKTKCDASMLYVPPAGAAKAIIEAISAEIPLIVCITEHIPQHDMVRVKAVLRSQKKSRLIGPNCPGIIKAEECKIGIMPGFIHKKGKIGIVSRSGTLTYEAVDQTTKAGLGQTTCVGIGGDPYNGTNFIDCLERFMEDPETKGVIMIGEIGGVAEEEAAEWVKTHNKQNKPIVSFIAGVSAPPGRRMGHAGAIISGGKGGAEGKFKALESAGIRVTKNPSKLGELMLQVMKERKLH
LEG_mgen_SCSa_NODE_1097_length_13586_cov_46.319860_-_ORF_8_(frame_3)_translation	MIKGFHMRSLLMNIPKMMFSSTIPYVFVNKDTKVITQGITGKQGTFHTQKAIEYGTKMVGGVSPAKAGTYHLGLPIFKNCREAREHTKCDASMLYVPPAGAAKAIIEAISAEIPLIVCITEHIPQHDMVRVKAVLRSQRKSRLIGPNCPGIIKAEECKIGIMPGFIHKKGKIGIVSRSGTLTYEAVDQTTKAGLGQTTCVGIGGDPYNGTNFIDCLERFMEDPETEGIIMIGEIGGVAEEEAAEWVKTHNTQNKPIVSFIAGVSAPPGRRMGHAGAIISGGKGGAEGKFKALESAGIRVTKNPSKLGELMLQVMKERKLH
LEG_mgen_SCSa_NODE_4725_length_2769_cov_26.689629_-_ORF_1_(frame_3)_translation	MIKGFQMKSLFYNASKMMFASSIPYVFVNKDTKVITQGITGKQGTFHSQKAMEYGTKMVGGVSPAKAGTFHLGLPIFKNCREAREQTKCDATMIYVPPTGAAKAIIEAVSAEIPLVVCITEHIPQHDMVRVKAVLRSQKKSRLIGPNCPGIIKAEECKIGIMPGFIHKKGKIGIVSRSGTLTYEAVDQTTKAGLGQTTCVGIGGDPYNGTNFIDCLERFMEDPETKGIIMIGEIGGVAEEEAADWVKTHNKQNKPIVSFIAGVSAPPGRRMGHAGAIISGGKGGAEGKFKALESAGIRVTKNPSKLGELMLQVMKERNLH
LEG_mgen_SCSb_NODE_55_length_49034_cov_58.625902_-_ORF_5_(frame_2)_translation	MLKHNLLRFGASLGIAHKVSFYMPMGIMKFFDLHEYQSKYILKKHGLNVQESDLATTPEEAREIATRLNGKFVLKAQVHAGGRGKGRLTSGLKGGVQLCHTPEDAFRYAKQMIGYNLITHQTVKEGLPVKSLLVEGTVDVKKEFYLAIVLDRKNQSPVVVACNEGGMDIEEVAKRNPSAIKVFPVNVLKGISDDTVKEIVDVYDFENEEQKAQARDQVKKLYHLFVKTDSTQVEINPWALDKKGNIYFLDAKFNIDESAHYRQKEIMDMKAHSKGSETVDENEEKAAKHGLSYIGLDGNIACLVNGAGLAMATMDIIKLKGAEPANFLDVGGGATEDQVAQAFSIIKSHPKVKAILVNIFGGIMRCDIIAKGIIGAVKRVGLDLPLVIRLTGTNADLGK…
LEG_mgen_SCSb_NODE_543_length_22092_cov_90.334305_-_ORF_1_(frame_1)_translation	MLKHNLLRFGASLGIANKVSFYMPMGMMKFFDLHEYQSKYILKKHGLNVQESDLATTPEEAMEIAKRLNGKFVLKAQVHAGGRGKGRLTSGLKGGVQLCSTPEEAFGYAKQMIGYNLITHQTVKEGLPVKSLLVEGTVDVKKEFYLAIVLDRKNQSPVVVACKEGGMDIEEVAKRNPSAIKVFPVNVLKGISDDTVNAIVDVYDFENEEQKAEARDQIKKLYQLFVKTDSTQVEINPWALDKKGKIYFLDAKFNIDESAHYRQKEIMEMKHNSKGSETVDENEEKAAQHGLSYIGLDGNIACLVNGAGLAMATMDIIKLKGAEPANFLDVGGGATEDQVAQAFSIIKSHPKVKAILVNIFGGIMRCDIIAKGIIGAVKRVGLDIPLVIRLTGTNAELGK…
LEG_mgen_SCSb_NODE_3492_length_3991_cov_15.695652_-_ORF_1_(frame_3)_translation	MLKHNLLRLGASMGFANKVSFYMPLGMMKFFDLHEYQSKYILRKHGLNVQDSDLATSPEEAMEIGKRLNGKFVLKAQVHAGGRGKGKLTSGLKGGVQLCHTPEEAFGYAKQMIGYNLITHQTVKEGLPVKSLLVEGTVDVKKEFYLAIVLDRKNQSPVVVACNEGGMDIEDVAKRNPSAIKVFPINVLKGITDETVNSIVDVYDFENEQQRTQARDQVKKLYQLFVKTDSTQVEINPWALDKKGNIYFLDAKFNIDESAHYRQKEIMEMKEHSKGSETVDENEEKAAKHGLSYIGLDGNIACLVNGAGLAMATMDIIKLKGAEPANFLDVGGGATEDQVTQAFSIIKSHPKVKAILVNIFGGIMRCDIIAKGIIGAVKRVGLNLPLVIRLTGTNAELGK…
LEG_mgen_SDHa_NODE_3787_length_3611_cov_7.977038_-_ORF_1_(frame_2)_translation	MMILRKGWNIYRYHLLSNSFQNTLRYFSTISNQKPTARHLKKLGNYTVYDHEYDAIVIGAGGAGLRAALGLVEYGFKTACISKLFPTRSHTVAAQGGINAALGNMTEDDWRWHFYDTVKGSDFLGDQDAIHYMTKEAPEIVLELESYGMPFSRTSEGKIYQRAFGGQSLKFGKGGQALRCAAVADRTGHSMLHTLFGRALAKNCIFFVEYFALELMMENGQVKGAVVINIADGTIHRMFAHHTIIATGGYGRAYFSCTSAHTCTGDGNGLVSRVGLPLEDLEFVQFHPTGIYKAGCLITEGCRGEGGFLLNSNGERFMERYAPNAKDLASRDVVSRAMTLEILEGRGCGPNKDHLHLQISHLPTNVLKIRLPGILETAKVFAGVDGTKEPIPVAPTVHY…
LEG_mgen_SDR_llike_NODE_312_length_28720_cov_31.279719_-_ORF_11_(frame_2)_translation	MSFLLRALVDHKKFIVIGALGGLYFLARRFFNSPYTLLNKRLDRKIIIVTGASDGLGKYTARELLKQGANVIYATRNEKKTKNIFEEMNTDEQSRARFIELDLSDFNSIQKFIDTFNKQYDKLDILINNAGMFSFDYKKTTDGIEQCLQVNTLGPMLLTEGLLDKLHQANGRIINVSSRAYKRLDLKAFSEMLSKKPEDISHIGSKYSGMRQYSLTKYGNIAFTIYLNSYLQKTGLNVKVVALHPGVILTELFKVEGKLLLVLAKAALYPILSIFCKSLQAGVQTTLHLCYLEDKDIESGGYYTDCQPRTLLPFATKSENVEGFMKMSKALIDHYGKGQNKLQIY
LEG_mgen_SLC25_NODE_30_length_57405_cov_65.237456_-_ORF_24_(frame_2)_translation	MRGGISENFEKVKFYLSASSAGVLRGGLGLILEHPLESVKTQWQDHMTIQNAREIIKYVYRKKGIRGFYRGFLPNLLRVASKQFYRWPMMLFFPKFFEKRLPKRVNEKFPGLNKILSGLAIANIELFLICPLDRLKVYFMTTTYNGGVKTNLLVKFFKDNSKSLFTELFRGFSPTFWRGNVSWISFMYLDYFLKRFLKRCRGSETLGIGDLILVSIGVGIGNVLTGKT
LEG_mgen_SLC25_NODE_1486_length_10356_cov_40.212533_-_ORF_7_(frame_3)_translation	MHLYLNIKIKFVELYKVSKTKMQGIYDNFEKVKFYLSVSSAGVMRGGLGLILEHPLESVKTQWQDHMTIKNAKEIINYVYRKKGIRGFYRGFLPNLLRVASKQFYRWPMMLFFPKFFEKRLPKKLNEKFPGLNKILSGLAIANIELFLICPLDRLKVYFMTSTYEGGVKSNLLLKFFKDNSKSLVSELFRGFGPTFWRGNVSWISFMYLDYYLKRVLKNCRCSDTLGFGDLLLVAIGVGVGNVLASKTISANYSH
LEG_mgen_SLC25_NODE_2107_length_7113_cov_36.517320_-_ORF_2_(frame_2)_translation	MQGISENFEKIKFYLSVSSAGVLRGGLGLILEHPLESVKTQWQDHMTIKNAKEIINYVYRKKGIIGFYRGFLPNLLRVASKQFYRWPMMLFFPKFFEKHLPKNLNEKFPGLSKILSGLAIANIELFLICPLDRLKIYFMTTTSCHGGKSNLLLKFFQDNSKSLLKELFRGFGPTFWRGNLSWISFMYLDYFLKRVLKRYRKSDTLGLADLILVSIGVGVGNVLSSKVNLIIYLVMPFDFAKTQMLKEGTANSSTLSVILQYYRHCGLKGLYTGWKFKALQYAVNSIFTVVTLERLEKKSKKI
LEG_mgen_SOD_NODE_418_length_25279_cov_52.522384_-_ORF_14_(frame_1)_translation	MQSENQIFTKLELPQLDYDYEDLDPVIPENLLKIHHTKHHQAYIDNYNKSMQEMQKALNENHLEKIAALTKDIKFNLGSHINHSLYWKNLAPIKNGGGQLPEDNSPLMCHIIQEWGSVEIFINDFIDNLMKIQGSGWGNLVYCKTTKTLSYLETKDQDPVSMMPRKVPILVIDGWEHAWYLKYLNEKKKYYSEIWKIINWKELEARYANASAK
LEG_mgen_SOD_NODE_510_length_22814_cov_23.352449_-_ORF_5_(frame_2)_translation	MNHHLILKFPKKHFLTGLKAVLPKLDYSYSDLEPVLPENLLKLHHTKHHQGYIDNYNKNIEEFTTAKEQGNLPKIVALTKDIKFNGGSHINHSIYWKNLSPVNKYGGKFPEKGSQLMQLIRKEWGSPEKLMSDFTENLMKIQGSGWGNLVYCNNTKTLCYIETKDQDPVALMPGKTPLLCIDGWEHAWYPKYLNEKKRYYTEIWKIINWKDVESRLSTLSKNI
LEG_mgen_unknown_protein_NODE_2661_length_5442_cov_49.087865_-_ORF_2_(frame_1)_translation	MATKGFLHRINQFFKSVDNFGVNIQFRINNRKEYKSTCGGITFSVFAILASAYVIYMFYNFVIGTNPSVIFSSRIIDADPAINFSASNFTFAFGLLFEGNGTPAIQETKSMFEYSVDFVQWLGINDIRKTRINIRQCIDSDFSEISPQLLSDNGVNDMFCPDQTGLNFTIAGLFTDYWYQYFELNINIREDVARDSSGVKKFMKVNPLQMIIFFKDTAIDYTSSEKPLPKYVNYIYKSIDFDFFKTEELFISKMELESDSNILFPDPIKTINSIFDRSVEYFNKVDRKEQDNPNKLKIGKFLIKSSSKISQVSRTYQKIPGFLADMSGIISQCLFLIFLLITFLNNQAADNKLIDRVLKFKGSKYYDVEYLINAFNNRGRKISVLKEILNPRNRIEKNP…
LEG_mgen_YMC_NODE_131_length_37631_cov_105.652597_-_ORF_16_(frame_1)_translation	MAYTNNQRNGHCLDDYLCSLFTGIAKIAIIQPFDFLRYRLQSSNAETSTSISQIIKHSRSKEGLKVFLKGISITSFSVLTTSFLHFTLYQKFYRKVKKLGAIESIKSQLIKNSLAASIAGLLSGATLGVTTVPIDNVRVKLQSIQNVVSFEKKVYCYQGAFDCIKKNLKQNGIFGFWKAGSLSLLRESIGSTIYFGLFEFFKSKYHLQGDDLKLHQRLLYGAVAGGMSWTITLPIDIIKTRMIADTINPNERLYKSTTDCARKIYHSVGIKGFYAGYSLIVSRGVVVNAVVLTLFDLTRTMLEKRREAC
LEG_mgen_YMC_NODE_853_length_16423_cov_20.564556_-_ORF_9_(frame_2)_translation	MEEKKQLISFKDFISGSVAGIVQVMLGQPFDIIKVRMQTNSEIKSVAQCALSILKKEGIKGFYRGTMSPLIGISAVSSVQFGAFEFAKNFLANRNKMLTGNASLTPIDFILSGMFSGFCGSFLVSPVELFRIKMQVQGVGKTQNQPQYSSSVDCAKKTFTKFGIRGVFQGLGATLFREVPAFVLYFGIYETLTGRSLRQYGSRDKIPRSKICLFGGLSGIGLWLGTFPNDVIKSKIQSSPYESGYRSILSATRAIYAEKGVPGFFKGIVPCLIRAPIINAMVFLTYEVVQQFLRKQKLEKK
LEG_mgen_YMC_NODE_1121_length_13360_cov_65.188468_-_ORF_6_(frame_2)_translation	MTETMTINIKISDNIYIIINLQYSMEEKKQLISFKDFISGSVAGIVQVMLGQPFDIIKVRMQTNSEIKSVADCALSILKKEGIKGFYRGTMSPLIGISAVSSLQFGAFEFAKNFLANRNKRLTGKATLEPKDIILSGMFSGFCGSFFVSPVELFRIKMQVQGVGKTQEPPQYSSSIDCAKKTFMKYGIRGVFQGLGATLFREIPAYVFYFGVYETLAGRSLIHYGTRDKIPRSKICLFGGLSGIALWLGTFPNDVIKSKIQSSPYDKGYRSIISATRAIYAEKGVSGFFNGIVPCLIRAPIINSMVFLTYEVVQQFLKKNNKKNK
LEG_MMC_NODE_2741_length_1438_cov_2.306960_g2041_i0_-_ORF_1_(frame_2)_translation	MDNLKMAGNNGISGSKAMAIEVISLMPMRTLIIYQYNHGTSFLETISLLYSQGGLKRFYSGLVPALISGPLSRFTDTSINTFVLDYFSKYSLPIFLKTAIVSIASGMIKILLTPFDTWQAMYQVQGLRGRHILLWKLKHIGVSALFHGASAQFLSSIFSNYPWYVTHNYLYKYFYPPHPRTSPGSSCTNTKGYTIKGIVTDAFIGFFASVNSDIISNSMKVVKTAKQTCAEECSYRELIMRIIKKDGLRGLFFRGINASIISNGLQGLMFNVLWKHFAQEKEIETF
LEG_MMC_NODE_4913_length_1034_cov_2.605619_g4088_i0_-_ORF_1_(frame_1)_translation	VSTQSTGIYFTYFMEIFNKAWKSGTSGYKAMILEVGGLMWLHTIMNYQYKHGTSIRQTMQILYQQGGIRRFYSGLGYSMINAPLIKFSDTFTNTLTLMLLDGTKVPLFAKTAIVSTLAWGVKLFLMPIDTIKTMYQVNGDKALGIISQKISTNGISVLFHGALANSFSSIIGHYFWFVTHNYLDHYLPKSTNRLHTLMRNAVIGFSSSFMSNAFSNIFRVIKISRQTSEENNTYLEVIKSITRKDGILGLFFRGIEVRFLASGIQGLLFNVLWKYF
LEG_MMC_NODE_6448_length_875_cov_5.821696_g5547_i0_-_ORF_1_(frame_2)_translation	STGFYLFHGDCQQSLEKWNIWIQSNDHRGGRINVASYNNELPVQHGTSIMQTMKILQQQGGVRRFYSGLGYSIINAPLIKFSDTFSNTLTLMLLDGSKVPLFAKTAIVSTLAWGVKLVLMPIDTIKTMYQVNGDKAIGILSQKISMNGISVLFHGALANSFSSIIGHYFWFVTHNYLEHYLPKSKLQVNTLMRNAVIGFSSSFMSNVFSNIFRVIKISRQTSEENNSYIEVIKSITMKDGIIGLFFRGIEVRFLACGIQGLLFNVLWKYFDSKHVK
LEG_MMC_NODE_6469_length_873_cov_14.866250_g5567_i0_-_ORF_1_(frame_1)_translation	EYGIMEDLKRAARSGFSGYKAMTIQVCSLMWLRTIMNYQYKYGTPIRKTISILYNQGGITRFYAGLLPALIQGPVSRFGDTFANSLALGLMKNKNFPIFLKTLFASMTAGAMRIFLTPIDTLKTMSQVEGKEARRILVAKIKANGMGALYHGSVANALGTFIGHYPWFVTHNYLNKYIPISKDPFWNTIRNACIGFTCSMVSDTTSNFMRVIKTARQTAEKKSSYLTVVKGIVQKDGVHGLLFRGLGIRLFTNGIQGLLFNILWKYFDRAKNTNANSHRK
LEG_MMSDH_NODE_2163_length_1653_cov_13.353165_g1536_i0_-_ORF_1_(frame_3)_translation	FLILNMLRSANAFKKSIINFSCIARFSSKVLPSFIKGEFIHSPVLPNFINGEFVQSKATKVYDIRDPSTGELINQTPETPKTEFDAAVAAAKKAYIKWRDTPQLTRQRYMFDLLEAIKERQYDIEKCISYEHGKNIPDSKGDIIRGIEVVEQSCNLAVTMMGDTIENVSRGIDMHYHRYPLGVCAGITPYNFPFMCPLWMFPISIVCGNTFVLKPSERVANSSMMLAQILKDIKLPKGVFNMVHGGKDTVNNICNHPDIKAISFVGSTPVGEHIWKTGTANGKRVQANLGAKNHAVLLPDADKEEALNALIGAVYGSSGQRCMAISVIVCVGETKDWIKDFVDKAKNLKIGNYSQDKVDLGPLTNKSTLDRIHSILAKVEEEGGRFILDGRNIKVEGYP…
LEG_MPPb_NODE_7629_length_782_cov_2.427362_g6688_i0_-_ORF_1_(frame_2)_translation	DEFVSMVAQEFGQVNKDSPNGMERLKMEKPLFLPSVTYIRNDNVENSGIGIFFNAPTWYHEDYYSFLLMERVIGQYDIEKHGPALLTETSRQNRCIEGLLGKYPDISKCSAFYNPYRDCGLFGVFMQGKQDYSQWMSYLSTVLPKLYGLQFNPIEFFRARARLWQELLNIQSPADVLQLIGPQILYLGRRVHRSEIAKRVSYCDPFSARESMQNMVF
LEG_OGDH_E2_NODE_2254_length_1611_cov_6.205462_g1617_i0_-_ORF_2_(frame_2)_translation	MNILAKKILQHSLSSNISHITAAFFARTSPYATFSVKNTQRSVPYVSISNNTNFFIPPKHLPSFVKMPHFYFASDVPTHKKLTMPSLSPTMERGNIIEWKKKEGEKIAPGDVVASIETDKAVVDFEVNEDGYLAKILFPAGSKDVKLGEVIGILVENEKDLAAFKDYKPGQAASAEPPKPAQKEKPKEAEKEKPKEAEKEKPKEKVKEKEKEPEPKVEKEKEKPKDERIIASPLAKKSAREKEINLSEIEGTGPKGRIIQADVLEKEKKKEKEKEKVKPKEAPKPKAAVPLPAIAEYEDVELNNIKKITAERLLLSKTSIPHFYVSSELNMDKIMNLRAELNKYSPSKLTVNHMIIKAAALACTKVPEANASFHRDFIRKYKNVDMSVAVQTDNGLSTP…
LEG_P5CDH_NODE_2059_length_1707_cov_20.753366_g1438_i0_-_ORF_1_(frame_3)_translation	VRGYNLMMSSIIKTASNVSKSANIGLVNSLKFFSVKLKDFSAYDPNAKHLGKLQNYVNGTWRSTRRYDEFLDPLHGHKFMTVPVTQQDEMGDIVEAMNSCPKSGLHNPFKNVERYLMYGQICRRAAEALNTDEVFNHFVKLIQRVFPKSIQQSAGEIKLIRIFFENFCGDNVRFLARGFNNPGDHLGQQTAGYRWPFGPVLLVSPFNFPLEIPVLQLMGALFMGNKVLTKAATKTAVCLEEFIRFLHACGLPKDDVILLHTNGRGIDELIPRIDLRMTCFTGSNDVAENLVRLTKGKIKIEDSGFDWKILGPDVSKDELEYVAHVSDQDAYAISGQKCSAQSLLICHSNWVKSGILEQIKAFAERRSLKSLTIVPTLSLTTKKIQDHVDNLLKIPGAKL…
LEG_PDH_E1a_NODE_4576_length_1080_cov_2.045680_g3769_i0_-_ORF_1_(frame_3)_translation	MLRYITEMSAMRRMEFAADELYKNKEIRGFCHLYIGQEAIAQGMEEGLTKEDCIITAYREHCNVLARGDTTYQILAEMMGKATGSVQGRGGSMHYYNKKNNFYGGHGIVGAQLPLGTGLAFALKYLKKKNACFAMYGDGSANQGQLYEASNMAGLWNLPVVYVIENNHYGMNCRGQIKLLSSINGEVQGISWINMRWDGCLHC
LEG_PDH_E1b_NODE_13400_length_508_cov_2.894253_g12291_i0_-_ORF_1_(frame_2)_translation	LKASVRDDNPVIFLENEIMYGKSFPRDEKVLSKDFVLPIGKAKIEREGKDVSIITFSRMVGESLEAAKKLQEEGISVEVINLRTLRPMDRTTILNSVRKTHRVVTVEEGWPTCGIGAEICAMIMETDAFDQLDAPVERITGTDVPMPYAENLEKLALPTEKNICNAVKR
LEG_PDH_E2_NODE_2254_length_1611_cov_6.205462_g1617_i0_-_ORF_2_(frame_2)_translation	MNILAKKILQHSLSSNISHITAAFFARTSPYATFSVKNTQRSVPYVSISNNTNFFIPPKHLPSFVKMPHFYFASDVPTHKKLTMPSLSPTMERGNIIEWKKKEGEKIAPGDVVASIETDKAVVDFEVNEDGYLAKILFPAGSKDVKLGEVIGILVENEKDLAAFKDYKPGQAASAEPPKPAQKEKPKEAEKEKPKEAEKEKPKEKVKEKEKEPEPKVEKEKEKPKDERIIASPLAKKSAREKEINLSEIEGTGPKGRIIQADVLEKEKKKEKEKEKVKPKEAPKPKAAVPLPAIAEYEDVELNNIKKITAERLLLSKTSIPHFYVSSELNMDKIMNLRAELNKYSPSKLTVNHMIIKAAALACTKVPEANASFHRDFIRKYKNVDMSVAVQTDNGLSTP…
LEG_PDH_E3_NODE_2905_length_1387_cov_3.812024_g2192_i0_-_ORF_1_(frame_3)_translation	AGPAGYIAAIKAAQKGLKTACIESRERLGGTCLNVGCIPSKALLNITQKFHEAKWQFKDFGIHTGQVSYDFNQIMNKKNRIVNGLTKGIEMLFKKNKVDHLKGWGKFQDEKTILVETAPGKGKTYRSKNFIIATGSEPNNLPGGILPIDEKRILSSTGALSLQEVPKKLVVIGGGVIGLEIGSIYQRLGSEVEVVEFMDKILPNFDTELSSYFFNLLKKSGIKFSLSHKVVGGSYAGDSIKVVAEDIKNKGQRKEITGDYALIATGRRSFTKGLNLEGLGIKLDKQGRIPVGKSLQTKIPGIYAIGDTIEGPMLAHKGEEDGVAAVEIICGEPGHVNHSVIPNVVYTHPELAFVGETEEEIKAKKIAYNKGKFPFLANSRAKATEDFNGFVKVLAEKKT…
LEG_PEPCK_NODE_1659_length_1973_cov_27.742105_g1098_i0_-_ORF_1_(frame_2)_translation	STGYKIMVSRTIQSISQKWFSSSCSAGITCCLRQHTQNEKLISWIEENIKLMKPDKVHFCDGSEEENQLLIQRMVHSGTFIPINPEIRPNSYLARSNTKDVARVEEFTLICSKKKENAGPTNIWADPVKQKEKMTKLYDGVMKGRTMYIIPFSMAPIGSPFSQIGIEITDSPYVVVNMRIMTHGMGKRAIESLGETGNFIPALHSVGAPLKPGQEDVPWPCNEKEKWIVHYPETKEIWSYGSGYGGNALLGKKCFALRIASKMGLEDGWLAEHMLILGVTAPWGKKYYITGAFPSACGKTNLAMLLPTIPGWKVETVGDDICWMRVGSDGRLWAVNPEAGCFGVAPGTSMKSNPNCMGSLKKNCIFTNCAMTSNGDVWWEGMTEEVPEFCTSWLRTEHY…
LEG_PGM_NODE_6632_length_859_cov_10.136132_g5725_i0_-_ORF_1_(frame_1)_translation	VSTQSTGYFISRMLQIGRRYFACCASAVKTYKVVFVRHGESSWNKENRFTGWTDVDLSNEGTKEALDAGQRLKGWKFDVCHASVLKRAIKTWNAIADVIDYHHLPLYKHWRLNERHYGALQGLNKSETAEKHGEKQVKIWRRAYDIAPPPLELTDPRHPINDPRYSLLPQDILPQTECLKDTVERVLPYWQDHIVADILSGKRVIVCAHGNSLRAIVKHLDNLTNEQVINLNIPTALPLVYELDKSLKPIKHYYLATDEEVKAKIEAVASQGKAKH
LEG_PGM_NODE_7126_length_816_cov_2.247645_g6200_i0_-_ORF_1_(frame_1)_translation	AVYKIVFVRHGESVWNKDNRFTGWTDVDLSEQGVKEAYEAGKKLEGYQFDVCHTSVLKRAIKTWNGIADVIDHHHIPVKKHWRINERHYGALQGLNKAETASKHGEDQVKIWRRAYDIAPPKLEKTDERFPGNDSKYALLPADVLPFTECLKDTVERVLPYWQDCIAADILSGKKVIVCAHGNSLRAIVKHLDNLANDEVINLNIPTGLPLIYELDKDLKPVKHYYLATDDEVKAKIEAVAAQGKAK
LEG_PGM_NODE_7361_length_799_cov_3.917355_g6428_i0_-_ORF_1_(frame_2)_translation	NHLQGNYKIVFVRHGESLWNKENRFTGWTDVDLSEKGFLEAADAGKRLNGYKFDVCHTSVLKRAIKTWNCIADGIDHHHIPVCKHWRLNERHYGALQGLNKSETAQKHGEEQVKIWRRAYDISPPELETSDTRYPRNDKKYRQLPEDVLPKTECLKDTVERVLPYWYDHIAADIIEGKKVIVCAHGNSIRALIKHLDGLSNEEVINLNIPTGLPLVYELDKNLKPLKHYYLATDEEVKAKVEAVASQGKAENKKK
LEG_PGM_NODE_10915_length_601_cov_6.712121_g9818_i0_-_ORF_1_(frame_3)_translation	KGWTFDVCHASVLKRAIKTWNAIADVIDYHHLPIYKHWRLNERHYGALQGLNKSETAEKHGEKQVKIWRRAYDIAPPPLEFTDPRHPINDPRYSLLPQDILPKTECLKDTVERVLPYWQDHIGSDILSGKRVIVCAHGNSLRAIVKHLDNLTNEQVINLNIPTALPLVYELDKSLKPIKHYYLATDEEVKAKIEAVASQ
LEG_PhoE-like_NODE_6449_length_875_cov_3.465087_g5548_i0_-_ORF_1_(frame_2)_translation	YYFNNYLYNIIYLFMGQTSSKSKLFVFGGIFVASSYFWLKPVWRKLSLSMLISAEDVIKKTRRPKRIILIRHGESEAHLDTSVFVHTPDNQISLTDNGIKQSEEAAITLKKIIGTESVKFFVSPYKRGKQTSDILMKHFKDNVTDEVIDPRLREQEWGNFKNKDPSVVAAAFAERKKVGKFFYRFLYGESGADVYDRVSLFLESIFRDMRYFNKASFENYVIVCHGLTMRLFTIRFLHLPTSSYETMVPPGNCEYWMFETDENGSYKMTVKYKENDTNISD
LEG_PhoE-like_NODE_7080_length_819_cov_4.816354_g6156_i0_-_ORF_1_(frame_2)_translation	MQCSTRLGKKSNLPEDLKESFSFGMESQKPTWILWFTLIPQTIRFHSLTREKKQAEEASVALKKIIGNESVKFFVSPYKRGQQTFEILLKQFKDNKTEQIIDHRLREQEWGNFKDKDPSVVSAMFAERRKVGRFFYRFLNGESGADVYDRVSLFLESIFREMRYFNQKPFENYVIVCHGLFMRFFTTRFLNLPITKFDTMACPTNCEYWMFEKEETGSYNMTIKYRIDEN
LEG_PRDH_NODE_5966_length_916_cov_5.440095_g5085_i0_-_ORF_1_(frame_1)_translation	VRVLKLCANVNEKDYSEIKTFCVKLNERLMKIFNHGKQKNALVMIDAEQTYLQYFIDYLTAYYITIFNKDFSIVGATVQSYLKNEPHFLKKFTKFCSENRLKFGLKITRGAYMIEENRLAQKMGVESPICSSLENTHANFNNSLKSLFENYKDGDKFCIGTVNIDSIKLMGELFAKYPDRSKGIFCSQLLGMGHNATNFCRKLGMNVGFYVPFGKFDILMPYLGRRAEEIAKGNYLIHLNKAVNQEIKARLFRRKNLV
LEG_PRX_NODE_7183_length_811_cov_11.707317_g6254_i0_-_ORF_1_(frame_3)_translation	MEPKCSKCEKDCCCLSYCPKAVLGKPAPEFKGIAWKDGDMSEIKLSDYKGKWVVLFFYPLDFTFVCPTEICNFSDMNDSFQNVNTVVIGCSVDSAFCHREWALKDRKLGGLSPLSIPLLSDLSKQISMDYGVLADDGPNKGVAFRATFIIDPKGILRQYSVCDLQVGRNVDEVLRLVQAFQHVDTHGEVCPAKWKPGAKAMVPKLESQELKQFFEEELAKK
LEG_SCSa_NODE_4242_length_1125_cov_7.781369_g3451_i0_-_ORF_2_(frame_1)_translation	MIKGFHMRSLLMNIPKMMFSSTIPYVFVNKDTKVITQGITGKQGTFHTQKAIEYGTKMVGGVSPAKAGTYHLGLPIFKNCREAREHTKCDASMLYVPPAGAAKAIIEAISAEIPLIVCITEHIPQHDMVRVKAVLRSQRKSRLIGPNCPGIIKAEECKIGIMPGFIHKKGKIGIVSRSGTLTYEAVDQTTKAGLGQTTCVGIGGDPYNGTNFIDCLERFMEDPETEGIIMIGEIGGVAEEEAAEWVKTHNTQNKPIVSFIAGVSAPPGRRMGHAGAIISGGKGGAEGKFKALESAGIRVTKNPSKLGELMLQVMKERKLH
LEG_SCSa_NODE_4722_length_1059_cov_11.561866_g3907_i0_-_ORF_2_(frame_1)_translation	MIKGFQMKSLFYNASKMMFASSIPYVFVNKDTKVITQGITGKQGTFHSQKAMEYGTKMVGGVSPAKAGTFHLGLPIFKNCREAREQTKCDATMIYVPPTGAAKAIIEAVSAEIPLVVCITEHIPQHDMVRVKAVLRSQKKSRLIGPNCPGIIKAEECKIGIMPGFIHKKGKIGIVSRSGTLTYEAVDQTTKAGLGQTTCVGIGGDPYNGTNFIDCLERFMEDPETKGIIMIGEIGGVAEEEAADWVKTHNKQNKPIVSFIAGVSAPPGRRMGHAGAIISGGKGGAEGKFKALESAGIRVTKNPSKLGELMLQVMKERNLH
LEG_SCSa_NODE_5473_length_969_cov_7.498884_g4618_i0_-_ORF_1_(frame_2)_translation	YNTSKFMFSSTIPYVFVNKDTKVITQGITGKQGTFHTQKAIEYGTKMVGGVSPAKAGTFHLGLPIFKNCREAREKTKCDASMLYVPPAGAAKAIIEAISAEIPLIVCITEHIPQHDMVRVKAVLRSQKKSRLIGPNCPGIIKAEECKIGIMPGFIHKKGKIGIVSRSGTLTYEAVDQTTKAGLGQTTCVGIGGDPYNGTNFIDCLERFMEDPETKGVIMIGEIGGVAEEEAAEWVKTHNKQNKPIVSFIAGVSAPPGRRMGHAGAIISGEKRRSRREIQGTGISRNKSNEKSIKAW
LEG_SCSb_NODE_2248_length_1615_cov_5.557069_g1613_i0_-_ORF_2_(frame_1)_translation	YQRRVRDIMLKHNLLRFGASLGIANKVSFYMPMGMMKFFDLHEYQSKYILKKHGLNVQESDLATTPEEAMEIAKRLNGKFVLKAQVHAGGRGKGRLTSGLKGGVQLCSTPEEAFGYAKQMIGYNLITHQTVKEGLPVKSLLVEGTVDVKKEFYLAIVLDRKNQSPVVVACKEGGMDIEEVAKRNPSAIKVFPVNVLKGISDDTVNAIVDVYDFENEEQKAEARDQIKKLYQLFVKTDSTQVEINPWALDKKGKIYFLDAKFNIDESAHYRQKEIMEMKHNSKGSETVDENEEKAAQHGLSYIGLDGNIACLVNGAGLAMATMDIIKLKGAEPANFLDVGGGATEDQVAQAFSIIKSHPKVKAILVNIFGGIMRCDIIAKGIIGAVKRVGLDIPLVIRLT…
LEG_SCSb_NODE_4329_length_1113_cov_3.748077_g3534_i0_-_ORF_1_(frame_2)_translation	IGKRLNGKFVLKAQVHAGGRGKGKLTSGLKGGVQLCHTPEEAFGYAKQMIGYNLITHQTVKEGLPVKSLLVEGTVDVKKEFYLAIVLDRKNQSPVVVACNEGGMDIEDVAKRNPSAIKVFPINVLKGITDETVNSIVDVYDFENEQQRTQARDQVKKLYQLFVKTDSTQVEINPWALDKKGNIYFLDAKFNIDESAHYRQKEIMEMKEHSKGSETVDENEEKAAKHGLSYIGLDGNIACLVNGAGLAMATMDIIKLKGAEPANFLDVGGGATEDQVTQAFSIIKSHPKVKAILVNIFGGIMRCDIIAKGIIGAVKRVGLNLPLVIRLTGTNAELGKKILDDFSKKTGTNFITANNLDDAAEKAVKSVKH
LEG_SDR_like_NODE_5587_length_957_cov_1.322398_g4726_i0_-_ORF_1_(frame_1)_translation	GLYFLARRFFNSPYTFLNKRLDRKIIIVTGASDGLGKYTARELLKQGANVIYATRNEKKTKNIFEEMNTDEQSRARFIELDLSDFNSIQKFIDTFNKQYDKLDILINNAGMFSFDYKKTTDGIEQCLQVNTLGPMLLTEGLLDKLHQANGRIINVSSRAYKRLDLKAFSEMLSKKPEDISHIGSKYSGMQQYSLTKYGNIAFTIYLNSYLQKKGLNVKVAALHPGVILTELFKVQGKLLLVLAKAALYPILSIFCKSLQAGVQTTLHLCYLEDKDIESGGYYTDCQPRTLLPFATKSENVEGFMKMSKALIDHYGKGQN
LEG_SLC25_NODE_3918_length_1177_cov_5.454710_g3149_i0_-_ORF_1_(frame_2)_translation	INAEYGRNLISKDPMQGISENFEKIKFYLSVSSAGVLRGGLGLILEHPLESVKTQWQDHMTIKNAKEIINYVYRKKGIIGFYRGFLPNLLRVASKQFYRWPMMLFFPKFFEKHLPKNLNEKFPGLSKILSGLAIANIELFLICPLDRLKIYFMTTTSCHGGKSNLLLKFFQDNSKSLLKELFRGFGPTFWRGNLSWISFMYLDYFLKRVLKRYRKSDTLGLADLILVSIGVGVGNVLSIMPFDFAKTQLLKEGTANSSTLSVILQYYRHCGLKGLYTGWKFKALQYAVNSIFTVVTLERLEKKSKKI
LEG_SLC25_NODE_5413_length_976_cov_3.466224_g4561_i0_-_ORF_1_(frame_2)_translation	YGDSFYRMRGGISENFEKVKFYLSASSAGVLRGGLGLILEHPLESVKTQWQDHMTIQNAREIIKYVYRKKGIRGFYRGFLPNLLRVASKQFYRWPMMLFFPKFFEKRLPKRVNEKFPGLNKILSGLAIANIELFLICPLDRLKVYFMTTTYNGGVKTNLLVKFFKDNSKSLFTELFRGFSPTFWRGNVSWISFMYLDYFLKRFLKRCRGSETLGIGDLILVSIGVGIGNVLTVMPFDFAKTQLQKEGNTNSGTLRVIRQCYQQYGIKGLYTGWKFKALQYAVNSIFTVITLERLEKKAKMI
LEG_SLC25_NODE_6213_length_895_cov_2.989051_g5319_i0_-_ORF_1_(frame_1)_translation	IYDNFEKVKFYLSVSSAGVMRGGLGLILEHPLESVKTQWQDHMTIKNAKEIINYVYRKKGIRGFYRGFLPNLLRVASKQFYRWPMMLFFPKFFEKRLPKKLNEKFPGLNKILSGLAIANIELFLICPLDRLKVYFMTSTYEGGVKSNLLLKFFKDNSKSLVSELFRGFGPTFWRGNVSWISFMYLDYYLKRVLKNCRCSDTLGFGDLLLVAIGVGVGNVLAIMPFDFAKTQLQKEGNTNSSTLSVIRQYYQQYGFKGLYTGWKFKALQYAVNSIFTVVTLERLEKKSKRI
LEG_SOD_NODE_8127_length_745_cov_3.154762_g7167_i0_-_ORF_1_(frame_3)_translation	MQSENQIFTKLELPQLDYDYEDLDPVIPENLLKIHHTKHHQAYIDNYNKSMQEMQKALNENHLEKIAALTKDIKFNLGSHINHSLYWKNLAPIKNVGGQLPEDNSPLMCHIIQEWGSVEIFINDFIDNLMKIQGSGWGNLVYCKTTKTLSYLETKDQDPVSMMPRKVPILVIDGWEHAWYLKYLNEKKKYYSEIWKIINWKELEARYANASAK
LEG_SOD_NODE_10140_length_636_cov_3.648313_g9054_i0_-_ORF_1_(frame_2)_translation	SYSDLEPVLPENLLKLHHTKHHQGYIDNYNKNIEEFTTAKEQGNLPKIVALTKDIKFNGGSHINHSIYWKNLSPVNKYGGKFPEKGSQLMQLIRKEWGSPEKLMSDFTENLMKIQGSGWGNLVYCNNTKTLCYIETKDQDPVALMPGKTPLLCIDGWEHAWYPKYLNEKKRYYTEIWKIINWKDVESRLSTLSKNI
LEG_TPI_NODE_6160_length_900_cov_8.157195_g5269_i0_-_ORF_1_(frame_1)_translation	VSTQSTGYLDISYRIDMNQQAARKIFIGGNWKCNGDKKFVEVHTKFLNEVDFDSDKCEVAVCPVYIHLEAVSNLLDKKYIVSSQNVSMFDNGAFTGEISAKQLKDIGINWTLIAHSERRLYFKEDEATIGEKIKKALAGGLNIILCVGERLEQREANETISVIENQMKTAGETVGDNWDRIVIAYEPVWAIGTGKTATPDQAQEVHDFIRQWIKKTISEEVSQKVRIIYGGSVTDGNCNDLIAKADIDGFLVGGASLKPAFKTIIESYKTKQ
LEG_TPI_NODE_6502_length_870_cov_8.818068_g5600_i0_-_ORF_1_(frame_2)_translation	YGILKMRRVFIGGNWKSNGDLNFIKSHMTNVINKLVFEASKCQVVISPITLHLDKVKALVSKSTGVEVSAQNVSMYPDGAYTGEVTAKQLKNFGLNWTIIGHSERRTLFGETNNVVGTKVKMALNGGLKVIACIGEKLEEREAGKTLDICLGHMSAIAKNTSDWKKMVIAYEPVWAIGTGKTATPEQAQEVHGEIRHWISKNVSPSVAKEVQIIYGGSVTETNAKDLIQKRDIDGFLVGGASLKGGFKTIVDSYVHKKLF
LEG_TPI_NODE_7243_length_807_cov_5.935967_g6313_i0_-_ORF_1_(frame_3)_translation	NAEYGILKMRRVFIGGNWKSNGDLNFIKTHMTNVINKLAFQASKCQVVIAPTTLHLANVKALLPKNTAVELSAQNVSMYPDGAYTGEVSAKQLKNFGLNWTIIGHSERRSLFGESNDVVGKKVKIALNNGLKVIACIGEKLEEREAGKTMDICLGHMSAIAKNTNDWKKMVIAYEPVWAIGTGKTATPEQAQEVHGEIRNWISKTVSPSVAKEVQIIYGGSVTEGNAKDLIQKRDIDGFLVGGASLKGGFKTIVDSYVHKKLF
LEG_unknown_protein_NODE_8069_length_749_cov_2.137574_g7109_i0_-_ORF_1_(frame_3)_translation	MATKGFLHRINQFFKSVDNFGVNIQFRINNRKEYKSTCGGITFSVRDSVDFVQWLGINDIRKTRINIRQCIDSDFSEISPQLLSDNGVNDMFCPDQTGLNFTIAGLFTDYWYQYFELNINIREDVARDSSGVKKFMKVNPLQMIIFFKDTAIDYTSSEKPLPKYVNYIYKSIDFDFFKTEELFISKMELESDSNILFPDPIKTINSIFDRSVEYFNKVDRKEQD
LEG_YMC_NODE_6385_length_881_cov_2.500000_g5485_i0_-_ORF_1_(frame_2)_translation	MVSPVELFRIKMQVQGVGKTQNQPQYSSSVDCAKKTFTKFGIRGVFQGLGATLFREVPAFVLYFGIYETLTGRSLRQYGSRDKIPRSKICLFGGLSGIGLWLGTFPNDVIKSKIQSSPYESGYRSILSATRAIYAEKGVPGFFKGIVPCLIRAPIINAMVFLTYE
LEG_YMC_NODE_8751_length_709_cov_2.073899_g7720_i0_-_ORF_1_(frame_1)_translation	VFLKGISITSFSVLTTSFLHFTLYQKFYRKVKKLGAIESIKSQLIKNSLAASIAGLLSGATLGVTTVPIDNVRVKLQSIQNVVSFEKKVYCYQGAFDCIKKNLKQNGIFGFWKAGSLSLLRESIGSTIYFGLFEFFKSKYHLQGDDLKLHQRLLYGAVAGGMSWTITLPIDIIKTRMIADTINPNERLYKSTTDCARKIYHSVGIKGFYAGYSLIVSRGVVVNAVVLTLFDLTRTM
LEG_YMC_NODE_9080_length_690_cov_4.118314_g8024_i0_-_ORF_1_(frame_1)_translation	GFYRGTMSPLIGISAVSSLQFGAFEFAKNFLANRNKRLTGKATLEPKDIILSGMFSGFCGSFFVSPVELFRIKMQVQGVGKTQEPPQYSSSIDCAKKTFMKYGIRGVFQGLGATLFREIPAYVFYFGVYETLAGRSLIHYGTRDKIPRSKICLFWWIIWYSFWLGTFPNDVIKSKIQSSPYDKGYRSIISATRAIYAEKGVSGFFNGIVPCLIRAPIINSMVFLTYEVVQ
SIVAB_2OGMC_NODE_8991_length_1017_cov_11.353933_g8044_i0_-_ORF_1_(frame_1)_translation	MNFLIGGLSGMIATTVIQPIDFLKVQIQVKSEMGIKNLNPFSITRQVYKEKGLGVFYKGLDSALLRQIVYTSIRLGLFYNLKDYLTKRYGRPPSMFVNSCASLFSGAVGSLAGNPADLALIRMQSDNNLPLNERRNYKNVFDALFRTIREEGIFTLWRGSTPTICRAMAMNFSLLVPFEEAKKFLKPYVKTDKMRAIYASMISGAAATVLSLPFDNVKTKLQKMKKGPDGKFPYKGVIDCFAKTAQTEGIGRLWVGVNTYYIRVAPHAVISLVTNEFLRNFFAKTPKKPTGTTKN
SIVAB_2OGMC_NODE_9604_length_965_cov_16.159905_g8606_i0_-_ORF_1_(frame_2)_translation	TSTYLNFVLGGISGCAATLVVQPLDMIKVRIQLLSEMGQKKINMFKVAKEILKKDGPLALYKGLDSAMVRQIIYGTSRLGLFYTFLDYFKKDRPDPTMIQKSISSFIAGGLASFVASPADLVLIRMQADGTLPPEQRRNYKNVFEGFKRIIKEEGVSNLWRGCLPTIGRACVLNLALLAPFEECKMRLRNIITEPTIRTMISSMIASFIGSLAAIPFDNTKTKLQKMKPNANGILPYKGIIDCMIKTAGTEGFKKLWVGFPTFYIRVAPHAILSLMINDFLRRKILNKKK
SIVAB_2OGMC_NODE_18160_length_510_cov_5.485640_g16819_i0_-_ORF_1_(frame_1)_translation	GSTPTICRAMAMNFSLLVPFEEAKKFLKPYVKTDKMRAIYASMISGAAATVLSLPFDNVKTKLQKMKKGPDGKFPYKGVIDCFAKTAQTEGIGRLWVGVNTYYIRVAPHAVISLVTNEFLRNFFAKTPKKPTGTTKN
SIVAB_AAC_NODE_11027_length_857_cov_22.538356_g9944_i0_-_ORF_1_(frame_1)_translation	MSHSQDTKNNKGGLTSFLLDFMAGGVSGAAAKTLAAPIERVKLLLQTQHANVKLQGKQYTGIVNCFTRVIKEEGVLALWRGNMSNVIRYFPTQAINFSVKDALNKYFCPYDSKKEPMKFFVGKLLSGGFAGAISLFCVYPLDFARTRLAADHGRTASERQFKGLGDCLKKIVKTDGIKGVYQGFGISVLGIFVYRAFYFGGYDTGKKLFFSGNERNIPFWKKYLFAQLVTSTSESLSYPIDTVRRRLMMQAGRKEQLYKGTFDCAFKIFQKEGFR
SIVAB_AADH_NODE_4952_length_1469_cov_1.046200_g4354_i0_-_ORF_1_(frame_1)_translation	FLTHRLYTPKLFQMTRLFGFATLTTINEPGFLSMVHSFYDDSSKYLNIPSQYLNLIRSARSSIRFNFPLVRDDGRIENISAFRVQHSLHYLPTKGGTRFSDKIDMSEVEALAFLMSLKLSVHNIPFGGAKGGIKINPYKYSKNELFQMTKRYTLELAKKNFIGPGIDVPGPDLGTGEQIMNWMKDTYVTLYGYKDVNSIACVTGKSVSQGGIEGRVEATGLGAFFGIREILNDERLAKKYSFVMGLQNKSFIIQGLGNVGYWLAHFLQLEGAKIIGVVEYDSSVYNPYGLDVENLLVYKTKNRTLKGFNSLDGTTKSFNKEEGFEKVLYKPCDVLAPAAMELTINLKNVDQLYCKILAEVANGPTTLGASKKLEEKSFNHSRFGFKCWRSDLLLF
SIVAB_AAT_NODE_694_length_3165_cov_3.864384_g570_i0_-_ORF_2_(frame_3)_translation	YQRRVRDSTMKILQLHSSINSSKLLFAKAFTSISPSYNTTKEINESCKRHTFFSWSAQNKVNPIAMVKAKGSYFWDAEGKKYFDMNSQLMCSNIGHGNEKVIQAIKNQADELCFAGPSFTTKIRAEIGPLLAKHTPGDLKKFFFTLGGAESVENAIKFAKFYTKRQKVFARHRSYHGATQGSGSLTGDPRRWHIEPSMPGIIRISDPYKYRSQLYQPGMTDEEFAEKIINQYEETLMFENPEAVAAIITESVTGTNGIIVPPAGFLPRLRKLCDKYGIVMVCDEVMSGFGRTGEWFAVDNWKVVPDIITMAKGLSSAYVPLGCVAVNSKISKEFDDRVFQGGLTYQAHPISLAASVATIKVMEEEDIVGNSKRMGLVMKDLLEELMLKHPSIGDVRSIG…
SIVAB_AAT_NODE_912_length_2900_cov_2.866571_g570_i1_-_ORF_1_(frame_2)_translation	LMCSNIGHGNEKVIQAIKNQADELCFAGPSFTTKIRAEIGPLLAKHTPGDLKKFFFTLGGAESVENAIKFAKFYTKRQKVFARHRSYHGATQGSGSLTGDPRRWHIEPSMPGIIRISDPYKYRSQLYQPGMTDEEFAEKIINQYEETLMFENPENVAAIITESITGTNGIIVPPAGFLPRLRKLCDKYGIVMVCDEVMSGFGRTGEWFAVDNWKVVPDIITMAKGLSSAYVPLGCVAVNSKISKEFDDRVFQGGLTYQAHPISLAASVATIKVMEEEDIVGNSKRMGLVMKDLLEELMLKHPSIGDVRSIGLFGCIELVKNRKTKQPMAPYGQSSEAMIKLVTYLKQHGVFVFNNSNLLHTNPPLIVKEDELREAFSVIDKALEITDGYVDCKI
SIVAB_ACAT_NODE_525_length_3439_cov_6.882246_g417_i0_-_ORF_2_(frame_3)_translation	INLLRNQLIVNKTKTVSTGLPPKSDDDVVIVACVRTPLTKSRKGGLKDTSPEIMLSQLIEELLKRGNVKPSQIEDIVIGNALQNGSGFLSTRISQFMANIPETTSVMTVNRLCASGLQAIINAANSISQKQTDIAIAGGVENMSMWDIKSMINIENISNDALNNQQVQKTFISMGLTSENIAEKMNIDRQAQDQFAVESHTKAYFAQKTGLFNEEIVPIKTKLKNQKGEYESVTVFEDDGIRQDTNITSLSKLKPAFKSNGTTTAGNSSQITDGAAVALLMRRSVAKENKSKVLARIIGYAIVGVPPEIMGIGPAVAIPKVLEKYGLKKEDIDIFEINEAFASQSVYCAQYLSIPKDKINPKGGAIALGHPLGCTGARQVATLLPELKRQHKRLGIVSM…
SIVAB_ACO_NODE_5633_length_1376_cov_0.669335_g4978_i0_extraction_-_ORF_2_(frame_2)_translation	MWSQVFYQEIEILKGGFIIVLRQTIFLLLLLVVAYALAGHVKIDFTKEPIGFDTVSNSDVYLNDIWPSKDEINQVINTYITPKLFQEVYSNITKGTEQWNNLPVKDNVLYDWDEKSTYIKEPPFFDLKTHRKGFSSISFARCLLNLGDSITTDHISPAGNISSKSSTAKYLNEKGISNTDFNSYGARRGNYEAMARGTFANVRLINKLISEPGPKTAHFPDKTVDDIFNVSQKYLQEGVQLIILAGKEYGSGSSRDWAAKGPKLLGVTAVIAEKL
SIVAB_ACTE_NODE_21141_length_428_cov_0.694352_g19741_i0_translation	VSTQSTGDFNFKYIFSKRMINPNVKFIFDNYIKLPVKYGKEFSKNLSLVEKDKLFVFPKQEVLFKFKVDEGMCNLVNTMHGGAISTLIDITTTIAVSGLDKNLRYNVSVELSTYFMNPINANRNILIHCKVPKIGKSLAYSY
SIVAB_AK_NODE_19673_length_464_cov_10.540059_g18303_i0_-_ORF_1_(frame_1)_translation	YQRRVREFNFRMSISFKRPLILLMMGAPGVGKGTFSRFLSRDLKLPELSSGSEFRRLIKTGKGELVEEIKRIQAAGKLVDDKIVLKMILQRMEDSEFKDGCILDGFPRTKGQAISFNEYKQIDMAIKIDLNENILVKKLTGRRECSKCQRNYNI
SIVAB_ALDH_NODE_4161_length_1602_cov_7.536271_g3632_i0_-_ORF_1_(frame_2)_translation	STGLSIKMLQTFLQKAFSTQIVIPKIPTSIINQILINGKFINSAKGHTLPIINPVTEELIAEVEEGEAFEIYTAVAAAKRVFERTWSKTTPMERCKILFKLSDLLEKNAEELALLETLNTGKPFHTSRNYDVKKAIELIRYYAGLGDKLTRQQIPISGPYLCYTRHEPIGVCGLMVPFNFPLLNMAQKIGPALMTGNTIVFKPSELTPLTALRVGQLALEAGLPDGVLNVVPGDGIKAGTGLVNDQNVDKISISGSTRLGIFIASQCHKTKLKRMSMQLGGKNAYIILDDADLSNAVDHAVDGAFFNSGQTSSSSSRVFVHENIYDKFIENVKEKTEKIRVGDPFDKTTQMGPLIDHIHRNRFMHYVKKGEKEGARLITGGNVIERKGFFVRPTIFADV…
SIVAB_ALDH_NODE_4434_length_1550_cov_1.234013_g3880_i0_-_ORF_1_(frame_3)_translation	ITRFMNQAFSTISPLPKIINQIFINGKFVNSISGKTFPKINPATEEIIAQIQEADKADVELAVKSAKKAFESGPWRKISPLERSKLTHKLADLIEKNADELAMLVSLENGKPFLMAKRTDVGFSVNALRYYAGWPDKIKGETIALEGPFFGFTRREPVGVCGQIIPWNFPLLMASWKLGPLLAIGCTSVLKPAEQTPLSALRLGELIMEAGFPPGVVNIVPGYGPTAGRAIVQHPMVDKIAFTGSVEVGLEIMRTAHKNNLKRITLELGGKSPLIIMDDADINEAVAVSSLAIFFNNGQCCSSGSRIYVHEKVYDKFLETKKKAAEKIIVGDPLDPKTEQGALIDQAQLQRYEYYIQNGKEEGAELITGGKRKPGRGYFVEPTIFAGVNDNMTIAKEEI…
SIVAB_ALT_NODE_1540_length_2402_cov_10.294945_g1305_i0_-_ORF_1_(frame_3)_translation	INQNLVKARYEVRGGIVLRSEDIGREILKGKKYPFEQFVYWNIGNPHNLGQIPISFPREVIGYLYSGAASLSCSEDAKRRAETYKKELKKIAPYTYYKGLDIVREKVAKFITERDNCETFKEDILLANGASAAIKTALQSILNGEKSTILCPIPQYPLYSASICVIGSNLAGYYLNEEKDWEVDINYLHTVYKNYSDKGYKMKAMVVINPGNPTGNLILEQNMKDIIKFCYDHKMILLADEVYQNNIYTNKKKWISFKKVLCNLEAPYNRTGLLSFHSTSKGFFGECGLRGGYTDMYNIPTIVKESILQLKELETCPNVVGQILMDLLVDPPTLKTCSEGTVKKYKEESKAVSMTLKKKAKLISTTLNKMKNIHCNDIDGALYAFPQIKFPQSFIEEAK…
SIVAB_ASCT_NODE_4606_length_1522_cov_2.020789_g4038_i0_-_ORF_1_(frame_3)_translation	VRVIIPVMNLLIRKTFASKVFRSAVSAIFDVKSGSKILFGGFGLCGLPENLISAIQRRDDIDNLTVVSNNCGTTNYGLGALLKKRQIKRFIGSYVGSNIELARQYLSGELELEFIPQGTLCEKMRCGGAGIPAFYTPTGYGTVIEKGGFPIKLGKDGKSIVICAPKREVREFNGKKYLMEESITGDYAFIKGWKGDSKGNIIFRKTARNFNYDAATAGKITVAEVEELVEEGELPPDEIHLPGVYVHRIFQGKNYKKLIEQRTVQSSSNTKQTAEDLKRNKIAKRAALELEDGMYVNLGIGIPTLVSNFLPKGIKIDLHSENGMLGYGGFPIQGDEDADLINAGKQTITENPGCVYFKSSDSFAMVRGKHLACTILGALQVSRTGDVANWIIPGKLVKG…
SIVAB_ASCT_NODE_6139_length_1312_cov_10.230380_g5432_i0_-_ORF_1_(frame_1)_translation	LLWGGFGYPGFAENCLRAILKRDDLKDLTCVSDNAQTSNWGLGPLLAKNKVKKMISSFIGQNQVFEKLYLNGELELELVPQGTLAEKLRCGGVGIPAFFTPTGVGTLVQDGGMPLKYRKDGTVEKFSNPKPVLIFNGKKYLQELAIKGDYALVKGWKGDTKGNVVFRKTARNFNIDVAMAGKTCIAEVEELVEQGQLDPDHIHLPGIFVKRIFKGERFDKKIEKLMTTDSVSTKGKKNDKEFILRNKIAKRAAQEVKAGMYCNLGIGLPTLVPNYLPKNMRVDFHSENGMIGVGPYPAPDKVDSDLINPGKETVSETKGCVYFKSSDSFGIIRGGHLDLTIIGGLQVSRFGDLSNWVIPGKMVKGMGGAMDLVANGTKVIILMRHYFKGESKIMEQNTL…
SIVAB_AST_NODE_8593_length_1052_cov_4.808649_g7682_i0_-_ORF_1_(frame_2)_translation	MLIKIFSNQIRFSNCLSRNITTCLFSHVKPRPADKILGVAEEFKKDINKNKVNLSVGAYRDNEGKPYLLSCVKAAQRIMCTTNIDHEYLPIDGLSSFVKHSLKLAYGNDNKYLKDGKIFGVQSLSGTGGLRVGFEFLSQHFQGNKTAYIPDPTWPNHRNVILRAGLNLKEYRYYDRVKKTLNLDGMLEDLNKAPKNSMVVLHACAHNPTGMDPNPAQWEEIYKVIKKRNHFPFFDMAYQGFASGDLTKDAYAVRRFAEDGCKFALSQSYAKNFGLYGERVGCFSMLCSSKENANVILSNVKYFARAEYSSPPKYGAKIVDIVLNDPELTEEWHD
SIVAB_ATM1_NODE_2559_length_1985_cov_1.922497_g2207_i0_-_ORF_1_(frame_2)_translation	MLKNFSHFYTRNILSTFHHARYLPLNLQLAKIQKIFQVQKEAVSKTENNIKLKIKQNNETLPPINGNGNNNKPRPSPKAPIHSMTRFLKPYFNNKYVKRIFSLSVLLTITSKGLITCSPLFLKFGINAVLNKSSIWKPVKYILISGGTRIGGQFLQEYRNILLNKMSTNVLVSFFERNDE
SIVAB_ATM1_NODE_2559_length_1985_cov_1.922497_g2207_i0_-_ORF_2_(frame_3)_translation	MYWCLFSKEMMNKIMKFDYSVFKDNSEKVVTSFDRCLTGLERCNRFLLGNILSNSIEIVIISLMLYSFLGSKYFLNTIFTYFIYMCATRRLATYRQKFLKQKYDAEVTSNWKLWDVIGNIQTVKYFQGENRESENFSNMMKEVRNLDQKVVKSLSLLNSIQSVIITTGMMANLTLGIYDCIRGILTPGDLIMLQGMFTQMMGPLNYMGMLMREIDDTKTNLQFGIDLMGNRSEDQKKQLKHFNFQKGKIEFKNVSFGFSNSNKMGYNPVFRNFNAVFYPGTTCAIVGESGQGKSTMFDLLYRLYEPFEGEILVDGQNINEVDVESYRKHLTICPQNGYLFNESLLYNIKYGNPKASLGKVEKMTKNVNLYEKIMSLGENFFTPVGTLGGKLSGGEKQRI…
SIVAB_CBS_NODE_4805_length_1492_cov_8.613919_g4227_i0_-_ORF_1_(frame_2)_translation	DNTHPQHDPHIHEEFYQRKKFCKSVLDAIGNTPMIRLNAIPKSEGIKCEIVAKCEYFNPGGSLKDRIGRRMIMDAEAKGVIKPNVSTIIEATSGNTGLGLALVGGVTGYKMIITLPEKMSQEKSDVLNALGAEIIRTPTEANFSDSNSHAGVARKLLQEIPNSVILDQYVNPSNPMAHYDQTAEEMWDQCDEKIDYVVMSAGTGGTIMGIARKLKEKTPQVKIIAVDTYGSILSFPESMNDKGVCPYKIEGIGYDFIPKTCERFKPTVDQWVKTGDKESFIMARRLIREEGLLVGGSAGAAMCGALKIAKDLPEDKRVVVLFTDGIRNYMSKFLNDDWMLENGFMEQEDYDKKYFPQNVAIFNGEDNDGYILDLGLKESPTVKLTSTVKEVLDVFSNNY…
SIVAB_DnaJ_Jac1-like_NODE_6504_length_1269_cov_22.779335_g5756_i0_-_ORF_1_(frame_1)_translation	MRSSKLRKTQQLMKSEKNYRKLAKEKHPDKGGNEKDFQELQQAYEVLSDENKRKVYDQYGEEGLKEGRADMSGFEGGDLFDLLGGRMGGSRGKKKTKSVLHTLNVTLEDVYSGKTKYFEISRYRICTTCKGSGSKDPNANTKCKSCDGRGIKLVIQRLPMGMIQTQAECGECKGEGYVIKEKDKCKDCKGQKVTKVSKMIEVSIDKGAPDGKRYVFQGESDEIPDYEPGDVVVEINIEKHKKFLRKGADLVYTADISLLEALTGFQLAVTHLDGRKILVKSNPGQIIKPGILKTVKDCGMPFFEAPYKFGNLYISFNIIFPEKLNSNQKVALAKLFPDLVQEEIKETIDETCTMVEYKPEDDNTHVGGGKKEHKGDGENEDEDDESRFFGGRRAKNVRC…
SIVAB_DnaJ_Jac1-like_NODE_7422_length_1166_cov_14.942252_g6591_i0_-_ORF_1_(frame_2)_translation	YQRRVRDILNKMSFFFNNFPFGMGGDFGGFEERGDASQGPKKEVNTTRYYEILKVAKNATADEIRKNYRKLAKEKHPDKGGNEKDFQELQQAYEVLSDENKRKVYDQYGEEGLKEGRADMSGFEGGDLFDLLGGRMGGSRGKKKTKSVLHTLNVTLEDVYSGKTKYFEISRYRICTTCKGSGSKDPNANTKCKSCDGRGIKLVIQRLPMGMIQTQAECSECKGEGYVIKEKDKCKDCKGQKVTKVSKMIEVSIDKGAPDGKRYVFQGESDEIPDYEPGDVVVEINIEKHKKFLRKGADLVYTADISLLEALTGFQLAVTHLDGRKILVKSNPGQIIKPGVLKTVKECGMPFFEAPYKFGNLYISFNIIFPEKLNSNQKVALAKLFPDL
SIVAB_DnaK_NODE_2329_length_2060_cov_432.737713_g2007_i0_-_ORF_2_(frame_3)_translation	MQLLQSQHISTIPKRQATKDAGTISGLNVLRIINEPTAAAIAYGLDKKFKNERNVLIFDLGGGTFDVSILSLEEGLFEVRATNGHTHLGGEDFDNRLVEYCAGEFRRKTNIDIKENPKALRRVRASCEKAKRALSSSTQATVDIDALMDGKDLNITLTRAKFEELNMDLFKKCIPPLDNVLKDSKLSKSEIQDVVLVGGSTRIPKIGQMVQDYFNGKEPNRSINPDEAVAYGAAVQAAVVSNVQDEDIKGVILLDVTPLSLGIETVGGVMTVLIQRNSTIPTKKTQIFTTYADNQSSVLIQVYEGERQLTKDNHNLGKFTLDGIPPMPRGQPQIEVTFDLDVNSILNVTAVEKSTGKNNKIVITNDKGRLSKEEIERLVKDAEKFKDEDEKVKQRIEAK…
SIVAB_DnaK_NODE_2336_length_2059_cov_432.861284_g2007_i1_-_ORF_2_(frame_2)_translation	MQLLQSQHISTIPKRQATKDAGTISGLNVLRIINEPTAAAIAYGLDKKFKNERNVLIFDLGGGTFDVSILSLEEGLFEVRATNGHTHLGGEDFDNRLVEYCAGEFRRKTNIDIKENPKALRRVRASCEKAKRALSSSTQATVDIDALMDGKDLNITLTRAKFEELNMDLFKKCIPPLDNVLKDSKLSKSEIQDVVLVGGSTRIPKIGQMVQDYFNGKEPNRSINPDEAVAYGAAVQAAVVSNVQDEDIKGVILLDVTPLSLGIETVGGVMTVLIQRNSTIPTKKTQIFTTYADNQSSVLIQVYEGERQLTKDNHNLGKFTLDGIPPMPRGQPQIEVTFDLDVNSILNVTAVEKSTGKNNKIVITNDKGRLSKEEIERLVKDAEKFKDEDEKVKQRIEAK…
SIVAB_DnaK_NODE_2341_length_2058_cov_433.045054_g2007_i2_-_ORF_1_(frame_1)_translation	MQLLQSQHISTIPKRQATKDAGTISGLNVLRIINEPTAAAIAYGLDKKFKNERNVLIFDLGGGTFDVSILSLEEGLFEVRATNGHTHLGGEDFDNRLVEYCAGEFRRKTNIDIKENPKALRRVRASCEKAKRALSSSTQATVDIDALMDGKDLNITLTRAKFEELNMDLFKKCIPPLDNVLKDSKLSKSEIQDVVLVGGSTRIPKIGQMVQDYFNGKEPNRSINPDEAVAYGAAVQAAVVSNVQDEDIKGVILLDVTPLSLGIETVGGVMTVLIQRNSTIPTKKTQIFTTYADNQSSVLIQVYEGERQLTKDNHNLGKFTLDGIPPMPRGQPQIEVTFDLDVNSILNVTAVEKSTGKNNKIVITNDKGRLSKEEIERLVKDAEKFKDEDEKVKQRIEAK…
SIVAB_DnaK_NODE_2414_length_2033_cov_438.768625_g2007_i3_-_ORF_1_(frame_3)_translation	MQLLQSQHISTIPKRQATKDAGTISGLNVLRIINEPTAAAIAYGLDKKFKNERNVLIFDLGGGTFDVSILSLEEGLFEVRATNGHTHLGGEDFDNRLVEYCAGEFRRKTNIDIKENPKALRRVRASCEKAKRALSSSTQATVDIDALMDGKDLNITLTRAKFEELNMDLFKKCIPPLDNVLKDSKLSKSEIQDVVLVGGSTRIPKIGQMVQDYFNGKEPNRSINPDEAVAYGAAVQAAVVSNVQDEDIKGVILLDVTPLSLGIETVGGVMTVLIQRNSTIPTKKTQIFTTYADNQSSVLIQVYEGERQLTKDNHNLGKFTLDGIPPMPRGQPQIEVTFDLDVNSILNVTAVEKSTGKNNKIVITNDKGRLSKEEIERLVKDAEKFKDEDEKVKQRIEAK…
SIVAB_DnaK_NODE_5286_length_1424_cov_226.259830_g2007_i4_-_ORF_1_(frame_3)_translation	MSNTAQVNSEEKTNIDIKENPKALRRVRASCEKAKRALSSSTQATVDIDALMDGKDLNITLTRAKFEELNMDLFKKCIPPLDNVLKDSKLSKSEIQDVVLVGGSTRIPKIGQMVQDYFNGKEPNRSINPDEAVAYGAAVQAAVVSNVQDEDIKGVILLDVTPLSLGIETVGGVMTVLIQRNSTIPTKKTQIFTTYADNQSSVLIQVYEGERQLTKDNHNLGKFTLDGIPPMPRGQPQIEVTFDLDVNSILNVTAVEKSTGKNNKIVITNDKGRLSKEEIERLVKDAEKFKDEDEKVKQRIEAKNQLEQFAYQVRQTLNEEKLKDKFTDDEKKTIEAKASEILKWANDNPAAAKEEFEAKVKELEAIFNPIMMRVYQQAGGQPGGMPGGMPGGMPNMNFG…
SIVAB_E1_NODE_2830_length_1902_cov_1.291268_g2444_i0_-_ORF_2_(frame_3)_translation	MAHRGRLNVLANVFEKPYPTIFAEFYGKHETGKVFNFSGDVKYHLGTFTERKFPNGKTVTLDLLPNPSHLESVNSVVMGKTRAKQHFEKKFKNEDYLAILLHGDSAFAGQGIVYEAIQMTNLEHFTTGGVLHVVTNNQIGFTTTPHESRSTPFCTDIGKSVEAPIIHVNADDPIAVDFVFKCAVEYIHKFHHDIIIDVIGYRRHGHNELDQPLFTQPLMYKIITKHDPVLKLYKERLIKEGIDENTFTQIDQKIKSFLQKFYEQGKQEKSSDLKEWQQKMWKDYHPMEYSEPQLTGVSIKTLRKIGETINKIPQNFNIHPQLKKHYENRLRSIRTGKDIDWATAEALAFGFLLQNGRTVRLSGEDVERGTFSNRHAVIHDQQTEKRFLPLAQILTKE
SIVAB_E2_NODE_5092_length_1449_cov_2.684569_g4475_i0_-_ORF_1_(frame_1)_translation	MNFLNKSILQQSLLTSFQRCSHFLGSPICIAPFSVLEKTFINENVVRSIPKFNQKCQNYYFARVKKPEPQFNKYNQFYFATNLPTHKKLTMPSLSPTMETGNIIEWKKKEGDKISSGDVLAGIETDKAVVDFEVNEDGYLAKILFPAGSKDIKLGEVIGILVENEKDIAAFKDYESGQTGAAPTKPEDKKTEDKAKDKKIPKEEKRISKEEKGERVIASPLAKKTAKEKEVAISDIEGTGPKGRIIQEDILQKAKEKPKPKEAAKPTMPHVEYEDVELNNIKKVTAERLLLSKTSIPHFYVSIDIKMDKVLNLRAQLNKHSTSKITVNHMIIKAASLACKKVPESNSSFHGSYIRKYSNVDMSVAVQTENGLITPIVFSAEKKGLSQIAKEMIELQKKA…
SIVAB_ECH_NODE_7452_length_1162_cov_2.289855_g6619_i0_-_ORF_1_(frame_3)_translation	TGFLGKLMNGNSNNCNEEDKIVYINHNDKCVEIILNNPKKLNALNLKMCQTIINKIIQWLPEHIKELDGIKISQHSVSQKYSIPMVIFLSGSGEKAFCTGGELKAIYNYKITNDLDTLFKFYEHEIFLFHCLLKIKPVIVSIWNGYVMGSGVGISINSSIRLATESTVFAMPETNIGHYPDVGAPYFLTRLFNHNIAVGIYVGLTGYRICGKECITSGAATHFVMNEKISLVKEAIIKLTNGGNNVTIDDVKMAIAPFCESYSQENFYFKNLKIIEHVFIPDSIFRIFTRLEDIISGKNNNFFNDENKLWAEETLAILKKASPVALLIFLEYSKLAIKFKSIEEDYEMEKKVFAKICLEDEFFEGIRALLINKDKTPKWKYKSIYD
SIVAB_ENO_NODE_577_length_3346_cov_40.236409_g465_i0_-_ORF_1_(frame_2)_translation	MTLDDHSLHRAAVPSGASTGIYEALELRDKDKNRYGGKGVLKAVSNVEKFIAPALIGQNPQEQTKLDKLMVEKLDGSQNEWGWCKKKLGANAILACSMALCRAGAHTAGVPLYEWIARLAGNPTNNYIMPVPSLNVINGGSHAGNQLAVQEFMLLPTGATSFRDSIRIGAEVYQALKKVILEKYGLNATNVGDEGGFAPDISNTEEAFQLLQSALKKSGHEGKVQLAMDCAASEYYIEESQEYNLLFKNKEKKQLLSKDQMVDLYSEWIDKYKVASIEDPFDQNDFDSYAKFTQRNEKKTQIVGDDLLVTNPVRVKMGIEKKLCNALLLKVNQIGSVTESIEAYHLSRKNKWGVMVSHRSGETEDNFIADLVVGLGTGQIKTGAPCRSERLAKYNQLSR…
SIVAB_ENO_NODE_1091_length_2727_cov_18.426154_g911_i0_-_ORF_1_(frame_1)_translation	VSTQSTGIIKMITGIKAREILDSRGNPTIEVDLKLDDGSVHRAAVPSGASTGVYEALELRDGDKKRFGGKGVLKACENVTTLIAPKLIGMDPTQQEKIDKLMVETIDSSKNEFGWSKSKLGANSILAVSLAVCRAGAYLSKLPLFAYIAQLAGNSIDKFTMPVPALNVINGGSHAGNQLALQEFMILPTGATSFTDAIRIGAEVYQTLKKVILEKYGLNATNVGDEGGFAPDITDGEEAIQLLLDAMERSGHKDKVVIGMDCAASEFWDEHEKKYNLKFKSKNESAMISGDDLGELYMKWADKYPIASIEDPFDQNDLGSYAKMTEKTKGNLQIVGDDLLVTNTVRVQMGIDKKLCNALLLKVNQIGSVSESIDAYKLARKNGWGVMVSHRSGETEDNF…
SIVAB_ENO_NODE_5222_length_1431_cov_4.210890_g4597_i0_-_ORF_2_(frame_2)_translation	INAEYGKLLKMGCSAGRTKEPLPPTKTNPRGVSIRQLIAREILDSRGNPTIEVDLILSDGALLRGAVPSGASTGMYEALELRDNDKKRYLGKGVLKACSNVEKIIFPKLEGMDVTKQEDIDKVMVEELDGTKNEYGWTKSKLGANAILAVSIAVCRAGAYVAKMPLYKWIAKLAGVNEKKFILPVPAFNLINGGSHAGNGLAIQEFMVLPTGAKTFKEAIMIGSEIYQTLKKLIHERYGQSATNVGDEGGFAPNLLEGEDALAVLSDAIEKAGYKDQVIIGMDCAASEFFQKDEKKYDLSYKAKDKKPGLTGSELGALYEKWASTYNIKSIEDPFDQNDFESYTAFTEKNKGKLQIVGDDLLVTNPTRIALGIEKKLCNSLLLKINQIGTISESIQAFK…
SIVAB_FUM_NODE_1942_length_2209_cov_9.361671_g1659_i0_-_ORF_1_(frame_3)_translation	MNLDKKISPETEKEGYRVEYDTFGPINVPQDKLWAAQTQRSLQNFEIGTKEDKMPLSVIRAMAIIKKTAAKVNMGYGMNHEIGEAIMKSSDEIIEGKLNEHFPLVIFQTGSGTQSNMNMNEVISNRSCELMGGKRGEKSKVHPNDHVNKSQSSNDTYPTAMHIAVVLDLHKFLLPELEKLKQNLEIKVQEFEHIIKIGRTHTQDATPLTLGQEFSGYLTQVTYHIEHINYNIKFISQLAQGGTAVGTGLNTKKGFDVAIAKEISNETKIEFTTAPNKFEALATHDALAHFSGTLNSLASSLYKIGHDIKLLSTDLRELKVEDVTPCEELLMACIQTMGNHAAVTLGNMHGHFELNVFKPLIVSNVLNSIYALSSGIKNFNENLIKNLQPDTERISELMK…
SIVAB_GCSH_part_NODE_16695_length_560_cov_4.147806_g15389_i0_translation_frame_1_reverse	QKIKHFTFPPLKILQEKFTKEHEWVMIEKDIATIGISEHAQNELGELIHVELPKMGKTFKVNDILGTIESVKTVSSIFSPLEGKVVESNQKLLKEPSLINTRPYTLGWYTKLKVNPQETKNILEDLMSENEYLKYVEDSKK
SIVAB_GCSL_part_NODE_2488_length_2009_cov_21.958023_g2081_i1_-_ORF_1_(frame_3)_translation	CIPSKALLNITQKYYEAKHNFKDMGINIGNVSYDFEKIMQRKTRIVDGLTKGIEMLFKKNKVDLLRGFGTFQDSKTILVESAPGQGQTYRCKNFIIATGSESNNLPGGILPIDENRVLSSTGALSLKEVPKKLIVVGGGVIGLELGSVYRRLGTEVEVIEFLDRILPNFDNELGSYFLSLLKKTGMKFHLSNKVIDGEVTEKSVKLITANLKKNNEKQEFTSDYTLIATGRRANTKGLGLEKTGIQVAKDGKIPINKSLQTKVPGIYAIGDTVEGPMLAHKGEEEGVAVVEMICGEPGHINHNVIPNVVYTHPEVAFVGLSEEEVKAKGIDYKKGKFPFQANSRAKCTDDYSGFVKVLADKKTDKILGVHIIGQNAGELIAECVLAMEGGCTSEDIGRT…
SIVAB_GCSL_part_NODE_4745_length_1500_cov_0.693372_g4170_i0_-_ORF_1_(frame_2)_translation	LKCSKHFVIRKNLFFSGTKYFTTAKFDYDICIIGSGPAGYVAAIKAGQKGLKTACVESMPKLGGTCLNVGCIPSKALLNITQKYEEAKSTFKSMGINVGNISYNFNQMQAKKDKIVDTLNRGIEMLFKKYKVDHLKGWGKFQDPKTILVESEPGRGKGKTYRCKNFIIATGSEPFQLPGGVLPIDEKRLLSSTGALSLREVPKKLLVVGGGVIGIELGSVYRRLGTEVEIIEYADSILPNFDKELAKYFLELLKKSGIKFYLGHKVIGGETDGTSVKITAQTKKQ
SIVAB_GCSL_part_NODE_4745_length_1500_cov_0.693372_g4170_i0_-_ORF_2_(frame_3)_translation	MNPRGRIPVGKSLQTKVPGIYAIGDTTDGPMLAHKGSEEGVAAVEIILGEPWHINHNVIPNVVYTHPEVAYVGQTEEELKEKGVEYKKGKFPFLANSRAKATEDFAGFVKVLADKKTDKILGVHIIGPSAGELIAECVLSMEYGASSEDIGRTVHAHPTLSEAVKEACLATFDKPLNF
SIVAB_GCST_NODE_7246_length_1185_cov_3.310964_g6427_i0_-_ORF_1_(frame_2)_translation	YQRRVRDLKMFQKFNNNLILHQLFSKIVNQYSHLLIKKTALNSFHKEKLNAKMVEFAGYEMPIKYFGLIEEHLHCRKNASLFDVSHMGQVRIHGKDRFNFIESLCVGNIRELKQNSASLSLLTNDQGGIKDDMIVTNLPNFLNVVINAGNVKKDLEHFRFMKNKFWESKDVTIEFIEDRSLIALQGPKSANVLQNLLSPTSNLNKLYFMQARFMNIPKLNEKALISRCGYTGEDGFEISISNQNVIKFCDMIFNKDGVVKPCGLGARDTLRTEAGLCLYGQDITEKTTPIEANLMWLIGKRRIQQGGFPGFERIKRQIERNEKVKRKRIGLLFEKGPVAREHMSIFNNEKKEIGKITTGTFSPSLKRPIAMGYIDTIFSKIATRVHVNIRGKDY
SIVAB_GcvP_NODE_710_length_3142_cov_13.304809_g585_i0_-_ORF_1_(frame_2)_translation	YQRRVRDLNINMIRHMFMQPVKQVANIFLLNENLLSKLSKFFFINSRTIELEKNSEIDDSLKHANFTKRHIGPSDSEINEMLNIIKVDSLEKLVKDTVPNKILLPENVKENQEKILGNPISESSALKYLKELADKNKIYKNYIGCGFNPVIVPPVILRNILQNPVWYTSYTPYQSEISQGRLESLLNFQTLISELTGLPCSNSSLLDEATSAAEAMVMAYNITEGEKKDFFVDENIFPFIKDTIRSRAHYLNINIIEGNIFEETSLKNKNLFGAIVQNPDNYGNVYDLTHIVKQIKQIGAVPIAIADAFSLLQIKSPEEMGFDIAVGSTQRFGVPMMNGGPHAGFLSTKKEYVRKMPGRIVGISKDAVGKKGYRLSLQTREQHIRRDKATSNICTAEAL…
SIVAB_GcvP_NODE_1733_length_2306_cov_17.332263_g585_i1_-_ORF_1_(frame_2)_translation	YQRRVRDLNINMIRHMFMQPVKQVANIFLLNENLLSKLSKFFFINSRTIELEKNSEIDDSLKHANFTKRHIGPSDSEINEMLNIIKVDSLEKLVKDTVPNKILLPENVKENQEKILGNPISESSALKYLKELADKNKIYKNYIGCGFNPVIVPPVILRNILQNPVWYTSYTPYQSEISQGRLESLLNFQTLISELTGLPCSNSSLLDEATSAAEAMVMAYNITEGEKKDFFVDENIFPFIKDTIRSRAHYLNINIIEGNIFEETSLKNKNLFGAIVQNPDNYGNVYDLTHIVKQIKQIGAVPIAIADAFSLLQIKSPEEMGFDIAVGSTQRFGVPMMNGGPHAGFLSTKKEYVRKMPGRIVGISKDAVGKKGYRLSLQTREQHIRRDKATSNICTAEAL…
SIVAB_GDH_NODE_4952_length_1469_cov_1.046200_g4354_i0_-_ORF_1_(frame_1)_translation	FLTHRLYTPKLFQMTRLFGFATLTTINEPGFLSMVHSFYDDSSKYLNIPSQYLNLIRSARSSIRFNFPLVRDDGRIENISAFRVQHSLHYLPTKGGTRFSDKIDMSEVEALAFLMSLKLSVHNIPFGGAKGGIKINPYKYSKNELFQMTKRYTLELAKKNFIGPGIDVPGPDLGTGEQIMNWMKDTYVTLYGYKDVNSIACVTGKSVSQGGIEGRVEATGLGAFFGIREILNDERLAKKYSFVMGLQNKSFIIQGLGNVGYWLAHFLQLEGAKIIGVVEYDSSVYNPYGLDVENLLVYKTKNRTLKGFNSLDGTTKSFNKEEGFEKVLYKPCDVLAPAAMELTINLKNVDQLYCKILAEVANGPTTLGASKKLEEKSFNHSRFGFKCWRSDLLLF
SIVAB_GrpE_NODE_13841_length_686_cov_6.119857_g12628_i0_-_ORF_1_(frame_2)_translation	EQQSVEDKPEKDKPIQENQKPNENGDVSEEKIEKSKEDQKDTKPEEKIETTTTKEEYVTKNKYDELQTIFNELSIKSEKIRSKFDELRKMYLDNVSETEQIKLRYTKEINNTKDYAISKFAKDLLDVHDNFNRALEMLKNKKLDSLTEDEQKEIFKSFIEGIKIVGITLSKTLNKYGVTEFTPLKEKFDPHKHESVFDYEDEKGTPGTVGQVLQSCFLIKDRILRPAR
SIVAB_HIBADH_NODE_386_length_3744_cov_12.737075_g298_i0_-_ORF_2_(frame_2)_translation	VSTQSTGFKMLGTLTKKLFHSKIAFFGLGNMGHYMARHLLKSGVKVYGCDLRKGVVEKFQQDGGQQYDSVEESVNNSEAVLTILPNYKIVKSVWEANLKHAKKGTIFIDCSTISPFDARELAEMAKDQGMIPVDAPVTGAQPGAVKGTLNFLIGVEKQYFDKVRRILKPMGKNFFHCGENSTGQVAKVCNNLCLAINITGLSESLVLGQKLGVDPKLLTEVLNAGSARCWSIDTYNPVPGVLENAPSSKNYAAGFANELMCKDVTIANDCLKKMKIDAPLARKTKEVYENLKKEAPEKDFSYVYQYVLNKNI
SIVAB_Hsp10_NODE_19711_length_463_cov_15.919643_g18341_i0_-_BLAST_Hit_translation	INTLRPLLNRCLIQKLIPKQISKGGIILSEKSIEKEARFGKVIAVGPGEYNEKGNIIKPAVKIGDIVLLPEYIGTKVPMKDTDNEYLIYKDTELLGIIEGFKH
SIVAB_HSP60_NODE_3692_length_1691_cov_14.577366_g3208_i0_-_ORF_1_(frame_1)_translation	DAVQVTLGPKGRNVILDQTYGEPKITKDGVTVAKPIEFSNKLINIGASLVKQVANRASTEVGDGTTTATILARELFKQGCKSVTSGINPMDIRRGMILAAEKVEEYLKEKSKKIASKEDLVQVATISANNDKEVGNLIASIIEKVGPEGTINVQSGKTLTHEVEYVEGLKFDRGYISPYFINDSKTQKCEYDNAMVLIMENKVSDVQALAKVLEFAVSKQKPLLIICEDVESEALAVLIINRLKANLKVVAVKTPGYGDNRKHMLEDIAISTGATVLSEEAGMTLQNTTPDKILGMVKKIIVTKDDTILIEGHGDKKAVNERISMIKDQIPRTTSDYDKEKLQERLGKLTGGVAVVKVGGSSETEVNEVKDRIDDAICATKAAIAEGIVPGGGVALLNA…
SIVAB_HSP60_NODE_4260_length_1584_cov_19.741935_g3723_i0_-_ORF_1_(frame_1)_translation	AKEIVHGEDCRKKILLGVQKIADTVEVTLGPKGRNVIIDQQFGEPKITKDGVTVAKSIDFNDKYMNLGANLIKQVANRSNNETGDGTTTATILARKIFGDGCKSITGGMNPMELRKGILLAVSKVEEYLNQISIKITNKEQLTNVATIAANGDQRLGKLIADIISKIGSEGTVNVENGKTVDHTVEYVEGLRFDRGFISPYFVTDYKKQVCEFEKPLILLMEDKLKDSDVQQLVKVLEYAKQTGRPLLIVAEDVETELLATLIVNKLRNSLKVCTVKTPGFGDNKKNFLQDIAIATGGQIFSEEIGTTLQNVDPKAMIGYLGSCKKVIMSKDDTIIIEGAGEKKEMAERINLIKELIPTTQSQYDKDKLQERLAKLTGGVAILKVGGVSETEVNEAKDL…
SIVAB_HSP60_NODE_4261_length_1584_cov_17.749485_g3723_i1_translation	AKEIVYGEDCRKKILLGVQKIADTVEVTLGPKGRNIIIDQQFGEPKITKDGVTVAKSIDFNDKYMNLGANLIKQVANRSNNETGDGTTTATILAIKIFVDGCKSITGGMNPMELRKGILLAVSKVEEYLNHISIKITNKEQLTNVATIAANGDQRLGKLIADIISKIGSEGTVNVENGKTVDHTVEYVEGLRFDRGFISPYFVTDYKKQVCEFEKPLILLMEDKLKDSDVQQLVKVLEYAKQTGRPLLIVAEDVETELLATLIVNKLRNSLKVCTVKTPGFGDNKKNFLQDIAIATGGQIFSEEIGTTLQNVDPKAMIGYLGSCKKVIMSKDDTIIIEGAGEKKEMAERINLIKELIPTTQSQYDKDKLQERLAKLTGGVAILKVGGVSETEVNEAKDL…
SIVAB_HSP60_NODE_4760_length_1497_cov_33.027737_g4184_i0_-_ORF_1_(frame_1)_translation	GINAEYGHSKLRMLSKTLNSLDIGKCLSVFPKMTFAGKELVHGEKARKLMLQGVNKLADAVQVTLGPKGRNVILDQTYGDPKITKDGVTVAKPIEFSNKLINIGASLVKQVANRASTEVGDGTTTATILARELFKQGCKSVTSGINPMDIRRGMILAAEKVEEYLKEKSKKIASKEDLVQVATISANNDKEVGNLIASIIEKVGPEGTINVQSGKTLAHEVEYVEGLKFDRGYISPYFINDSKTQKCEYDNAMVLIMENKVSDVQALAKVLEFAVSKQKPLLIICEDVESEALAVLIINRLKANLKVVAVKTPGYGDNRKHMLEDIAISTGATVLSEEAGMTLQNTVPDKILGMVKKIIVTKDDTILIEGHGDKKAVNERISMIKDQIPRTTSDYDKEK…
SIVAB_HSP60_NODE_18719_length_491_cov_11.288462_g17371_i0_-_ORF_1_(frame_2)_translation	MIQLSLKEQVKKKEITERINLIKELIPTTQSQYDKDKLQERLAKLTGGVAILKVGGVSETEVNEAKDLINDAICATKCASEQGIVVGGGCALLYAFKHIKDLKGENFDQDNGINIVRQALKYPILAICNNAGL
SIVAB_Hsp90_NODE_1787_length_2278_cov_84.721990_g1517_i0_-_ORF_1_(frame_3)_translation	MTTETDTFNFNADINQLLSLIINTFYSNKEIFLRELISNASDALDKVRYLSITDPSILRNEDKLLIRIIADKTNNTLTIWDTGIGMTKPDLISNLGTIARSGTRQFMELLNAGADISMIGQFGVGFYSSYLVANKVVVISKHNDDEQYRWESIANSTFVVAKDVILEDKSNEIGRGSKIILYLKDECIEYLEERKLKDLIKKHSEFISFPIELWVEKSTEKEVDDDEEEDKDKEKKEGDEPKVEDENKKEKKKKKIKEISHEFERVNNTKPIWLRKREDIKKEEYSNFYKSITNDWEDHLSCIHFTMEGNLEIKGILFVPKRAPFDLFEAKKKKTNIKLYVRRVFIMDDCDELIPEYLGFIRGVIDSDDLPLNISRESLQQNKILKAIKKAVTKKCIEM…
SIVAB_IscS_2_NODE_5386_length_1410_cov_0.915822_g4749_i0_-_ORF_2_(frame_2)_translation	MISCRSRDIKYMDQKGIGALYIRRKPRVRLVPIINGGGQERGFRSGTLAAPLCVGFGKAAEVALAEMKYDSEYITNLSNRLYSKLKANIKDIYLNGDEKHRYSGNLNISFAYVEGESLIMAVKELAVSSGSACTSASLEPSYVLRALGVDEELAHTSLRIGIGRFTTLKEIDFAAELITKSVEKLRKLSPLWEMVQEGVDLKSIKWASH
SIVAB_IscS_NODE_5386_length_1410_cov_0.915822_g4749_i0_-_ORF_1_(frame_1)_translation	GINAEYGKKYKLAMKSMTKIALKYINNFSMSNLLIFSHCKRNFTNLPSMNLVKDEVGKQTIFFDFQSTTPLDPRVLDAMLPYMTVRYGNPHSKSHDFGWEAEKAVESAREKIAKLIGAESKEIIFTSGATESNNLALKGVAEFKKENKKHIITTQTEHKCVLDTCRNLQQHGFDVTYLPVKKNGLIDLQNLKDNIRKDTVLVSAMFINNEIGVIQPIKEIGEICRKNKIYFHTDAAQATGKIPINVNELNIDLMSISGHKIYGPKRYWCTIY
SIVAB_IscU_NODE_707_length_3146_cov_2.038092_g582_i0_-_ORF_3_(frame_2)_translation	MSLSVIDITKPQLLFCFTFAFIVRNGGFDRVFCQNRTVNFHRRQFKFFSNIGVFDRLRFVERLPFHPFGDQGAGSDSGTAAVSFKTRVFNDTFIVDFNLQLHHVATGRCTHHAAADVLVVVVKGTHVTRILVMVDNFFAVSHYKFS
SIVAB_MDH_NODE_7705_length_1139_cov_19.993083_g6859_i0_-_ORF_1_(frame_2)_translation	MQAHLRKASNMLFKLSSMNFWKTNTTMKAPMNVAITGGTGNISYALAFRVASGELFGHDQPVNLNMIDIPQMEPRLQGVKMELNDCAFPLLQKLTTTSKLSLGFKDIDVAFLVGSKPRTKGMERSDLLKANGKIFIEQGKALSDYAKRKVKVLVVGNPANTNCLIAMKNAKSLKPECFAAMTRLDHNRAIAQLAKKTKVPVTSISKVAIWGNHSATMFADIYNSTVNGKKALDVVGREWYEKTFIPVVAQRGAEIIKARGASSAASAANAAIDCVRDWILGTQEWKSMAIPTDGKLYKVPKDLIFSFPVTTERGVVKTVTGVNFDQFAQKKIKATTEELLAERKEVENMLI
SIVAB_MDH_NODE_9327_length_988_cov_25.130081_g8352_i0_-_ORF_1_(frame_3)_translation	MQAHLRKASNMLFKLSSMNFWKTNSTTMKAPMNVAITGGTGNISYALAFRVASGELFGHDQPVNLNMIDIPQMEPRLQGVKMELDDCAFPLLHKLTTTSKLSLGFKDIDVAFLVGSKPRTKGMERSDLLKANGKIFIEQGKALSDYAKRKVKVLVVGNPANTNCLIAMKNAKSLKPECFAAMTRLDHNRAIAQLAMKTKVPVTSISKVAIWGNHSATMFADIYNSTVNGKKALDIVGREWYEKTFIPVVAQRGAEIIKARGASSAASAANAAIDCVRDWILGTQEWKSMAIPTDGKLYKVPKDLIFSFPVTTERGVVK
SIVAB_ME_NODE_1335_length_2525_cov_89.812344_g1130_i0_-_ORF_1_(frame_3)_translation	MDSVGLTLVYTPGVAASCLEIQKDLRKSYQYTNKGNSILIVTDSSDFEQVKNGQKWNDNAAMPYLEAFCLYYKMIANIDAYPLIIDHTSIKSPEDLLETINGVMPGYAAVEFFSMKSDLLKGFYELLEKEKKKNYAHIFTSTKRLICELLSKKHTPLTSNGFYSAILRAALDCRCKENLNDIACHIIKLIEADKIKFNGDFYADFVQILTLATDYIFEKKWQDSSLDEFNINGEKLSKEYIMTKFKKFLRFGPSSWVDSYPNNYYFNKTNTDTNSCLLHSLYKGVIEPGCKIQLKNPVELNNLITWKVLDRLSSILIEKPEEAVNITCKSNFGAIITNGTAILGLGDIGAVAGLPVMEGKSFLFKTFGGTDIVPICIEEHDNDKVIRIIKRISPTYSII…
SIVAB_ME_NODE_1471_length_2444_cov_92.939577_g1130_i1_-_ORF_1_(frame_3)_translation	MVLTLVYTPGVAASCLEIQKDLRKSYQYTNKGNSILIVTDSSDFEQVKNGQKWNDNAAMPYLEAFCLYYKMIANIDAYPLIIDHTSIKSPEDLLETINGVMPGYAAVEFFSMKSDLLKGFYELLEKEKKKNYAHIFTSTKRLICELLSKKHTPLTSNGFYSAILRAALDCRCKENLNDIACHIIKLIEADKIKFNGDFYADFVQILTLATDYIFEKKWQDSSLDEFNINGEKLSKEYIMTKFKKFLRFGPSSWVDSYPNNYYFNKTNTDTNSCLLHSLYKGVIEPGCKIQLKNPVELNNLITWKVLDRLSSILIEKPEEAVNITCKSNFGAIITNGTAILGLGDIGAVAGLPVMEGKSFLFKTFGGTDIVPICIEEHDNDKVIRIIKRISPTYSIINLE…
SIVAB_ME_NODE_1563_length_2390_cov_95.159081_g1130_i2_-_ORF_1_(frame_3)_translation	LTLVYTPGVAASCLEIQKDLRKSYQYTNKGNSILIVTDSSDFEQVKNGQKWNDNAAMPYLEAFCLYYKMIANIDAYPLIIDHTSIKSPEDLLETINGVMPGYAAVEFFSMKSDLLKGFYELLEKEKKKNYAHIFTSTKRLICELLSKKHTPLTSNGFYSAILRAALDCRCKENLNDIACHIIKLIEADKIKFNGDFYADFVQILTLATDYIFEKKWQDSSLDEFNINGEKLSKEYIMTKFKKFLRFGPSSWVDSYPNNYYFNKTNTDTNSCLLHSLYKGVIEPGCKIQLKNPVELNNLITWKVLDRLSSILIEKPEEAVNITCKSNFGAIITNGTAILGLGDIGAVAGLPVMEGKSFLFKTFGGTDIVPICIEEHDNDKVIRIIKRISPTYSIINLEDI…
SIVAB_MMC_NODE_5745_length_1363_cov_3.026699_g5073_i0_-_ORF_1_(frame_3)_translation	IMNYQYKYGTTITQTIKILYRQGGIKRFYSGIGFSLINAPVIRFSETFMNTFTLKLLEKSNLPLFVKTFIVSTCSVGVKILLTPLDTLKTMCQVKGPRAMPIIIRKIKANGLSALYHGALANSVGSILGHYPWFLTHNYLHIYLPKPQGQFNNILRNAIIGFASSINSNLISNCLKVVKTTRQTSEMSNSYVDVVKAIMVKDGLKGLFLRGIKVRFVASGIQGLMFNVLWKYFEDRAKTNENKKFALN
SIVAB_MMC_NODE_11623_length_814_cov_1.751092_g10511_i0_-_ORF_1_(frame_2)_translation	MEDLKKAIRSGYSGFQAMTIQVCTLMWLRTIMNYQYKYGTSIRQTIEILYKQGGIRRFYSGLLPGLIQGPVSRFGDTFSNAFALEITRRTHLPIFIKTAFASLTAGFVRILLTPIDTIKTMSQVEGKEAMKILTNKIRANGIGSLYHGALANALGTFIGHYPWFVSHNYLNKYIPTYNSPMKNLLRNAFIGFTCSMISDTTSNFMRVIKTSRQTSEKKSSYLEVVNLILRKDGIQGLLFRGLGIRLFTNGLQGLMFNIM
SIVAB_MMC_NODE_11684_length_810_cov_2.436310_g10567_i0_-_ORF_1_(frame_2)_translation	SSGVSGFKAMTVEVASLMWMHTIINYQYKYGTSIRDTIKILYIQGGIKRFYSGFVPALISGSLSRFADTSLNTLIMKYLKNYPLPIFIKTAIVSFTAGMVKVGLTPIDTLKTMYQVHGQQAGKIILMKLKYHGVFVLFHGAAAHLLSTIFAHYPWFVTHNYLYKYVFPHHRHKYGLKSVFIDACIGFYFISQFGYIFKFYESN
SIVAB_MMC_NODE_11685_length_810_cov_2.260615_g10567_i1_-_ORF_1_(frame_2)_translation	SSGVSGFKAMTVEVASLMWMHTIINYQYKYGTSIRDTIKILYIQGGIKRFYSGFVPALISGSLSRFADTSLNTLIMKYLKNYPLPIFIKTAIVSFTAGMVKVGLTPIDTLKTMYQVHGQQAGKIILMKLKYHGVFVLFHGAAAHLLSTIFAHYPWFVTHNYLYKYVFPHHRHKYGLKSVFIDACIGFYFISQFGYIFKFYESN
SIVAB_MMSDH_NODE_3851_length_1657_cov_11.724183_g3352_i0_-_ORF_1_(frame_2)_translation	STQSTGDINYRMLIKKSLLHLTKRSLSFAFSTKVLPNFINGEFVPSKTGKLYDIVDPSTQKLISQAPESTLSEFDSAVDSARRAFITWKKTPILTRQRYMADFLHLIKQRQDALERCISLEHGKNLPDAHGDIVRGIEVIEQSCSLSNLLLGDTIENISKGMDMYTYRVPLGVVAGIAPFNFPVLVPLWMFPISLVCGNTFILKPSERVANSSMMLAEMLKEIKLPKGVFNMVHGGKRIVDAICTNRDIKAISFVGSNRVGEYIWKKGTETGKRVQANLGAKNHMVILPDADKDEAINALVGAAYGSSGQRCMAISVAVFVGESKKWVKDFVAKTSKLTVGNAFEKKVDMGPLTNKGNLERIKNILSNLEREGGKFLLDGRDIKVNGYPNGNWLGPTII…
SIVAB_MPPa_NODE_377_length_3780_cov_5.963592_g290_i0_-_ORF_2_(frame_2)_translation	MFMTQMLKQNLITKILHANFSSMFKNVKHFAHRLAACDPQKELENHKPILYSDSSDHIQYTISKLKSGITVITEESQFPSNVHAGVLINLGTRDENHNTSGTCLALKHSFLNTFKNSNETLNYGKIQMSGGITEIEYDEENLWYSTHCFEYDTHDMLKMICESAFEKKSKFAVNLAREKNKIFHTMQNQMQQINPFNRNIQMLISTAYGYQNLGMPKFGYENNIRNINHTMLNSFMGKITPDKVIIVGNGIRKHDEFVYLVEDIIKQHSFKNTTNKTREKSTYVGGETKNYIDHPEINILIAYKSVPWNHPLMPAYSLIHTMFGGAQGFSVGGPGKGMLNRAYRHILRSKYYVGSCESINLHYSDSGLFGLNFTGAAEYGKNIVEDMIDTINGFRIKID…
SIVAB_MPPb_NODE_5295_length_1423_cov_1.989969_g4660_i0_-_ORF_1_(frame_3)_translation	TKINPSQFSKLELKNFGDLPIGEIPEPLKYIRPFQMTTLENGIRVCTEKWNSNLCAVGVLVDAGSRYEKPNTSGTAHFLEHILFKGTKNRSKSNFESEIEQMGATLDAYTSREHTLFHMQCYPKDIGKCVNILGDMLQNPLLLKQQIFEEKETIKTELEECNKDAQELIMEAGHSTAFRGSSMGQPILGEVDNIYNVTQEMVKEFHMTHYVGINFVVIATGNVNHEEFVDKIVQNFGKVNQNPPKGLVKPNMQKPKFNQQVTFIRNDQVLNSGIGVFYQAPSWHDNDYYPMLVMERVFGQYDIEKNQYLLTNPNSQNRLIEGILTKIPNITKSSAFFNPYKDCGLFGFYMSGEGNYVNWMKYLCTLYPSLYGTQFNPIEFYRARAKIWQELLNIQSPPD…
SIVAB_P5CDH_NODE_5525_length_1390_cov_10.316706_g4883_i0_-_ORF_1_(frame_1)_translation	VRGYIMEQTSSQEKKTKEVFPCNKLKLEEFANFDSEAKYFKLSNYINGEWRSVEKYDEYLDPLNGGKFMAVPVTQKNEMDDIISSMKACPKSGLHNPFKNVDRYVLYGNICRKVAEALHQKEIERHFARLIQRVFPKSDPQAYGEIKVLRAFFENFSGDNVRFLARGFSNPGDHTGQQSNGFRWPYGPVAVISPFNFPLEIPMLQVMGALFMGNKVLLKAASKVALPAEEFVRLLIACGMPKNDLIFVNTNGQNIEYLLAQCELRMTMFTGGGKNAENLAHILKGKLKMEDSGVNWKILGPDCPKDEIDFVAQTADQDAYALSGQKCSAQSLLFCHKNWIQNGFIEKIKALADQRSIKNMTISPVMTWTNKKLSEHIEKLLKIPDTKVLIGGHPVEEEH…
SIVAB_P5CDH_NODE_7959_length_1114_cov_27.061803_g7087_i0_-_ORF_1_(frame_1)_translation	GLHNPFKNVDRYVLYGNICRKVAEALHQKEIERHFARLIQRVFPKSDPQAYGEIKVLRAFFENFSGDNVRFLARGFSNPGDHTGQQSNGFRWPYGPVAVISPFNFPLEIPMLQVMGALFMGNKVLLKAASKVALPAEEFVRLLIACGMPKNDLIFVNTNGQNIEYLLAQCELRMTMFTGGGKNAENLAHILKGKLKMEDSGVNWKILGPDCPKDEIDFVAQTADQDAYALSGQKCSAQSLLFCHKNWIQNGFIEKIKALADQRSIKNMTISPVMTWTNKKLSEHIEKLLKIPDTKVLIGGHPVEEEHHIPDCYGSFRPTAVFVPLKHFQDKQYFDLLTTEIFGPLQLVTEYDDDSLDNVIAIIESCQQHLT
SIVAB_PDH_E1a_NODE_5399_length_1408_cov_8.437158_g4762_i0_-_ORF_1_(frame_1)_translation	EYGDLNMAMKFNSNFIKAQTVSLFNNFSQRLFTTLNKSITIPLPRYQTIDIDKTLLPTSTTSSKTELLKYLKDMCTMRRMEFAADELYKNKEIRGFCHLYIGQEAIAEGMEEAITKDDCVITAYREHCNVLARGDTTYKILAEMMGKATGSTKGKGGSMHFYSKKNNFYGGNGIVGAQQPLGIGLAFALKYLGKPNACFTLFGDGSVNQGQLYEAANMAGLWKLPIVFVIENNHYGMGTAEMRSSFYRPLMGKFRGYSGLLCDGMDVFSVREAVKFCKEYAIKNGPMFLEIDTYRYQGHSMSDPGVTYRSKDEVTQWRKNRDCIDKIKDDLFKFNLATENEVKEIIREIKQKIDDEVVRIRKDPYPDEKELFTNIYVDKKIPFIRNVEYCDSVFNEHSA
SIVAB_PDH_E1b_NODE_4707_length_1506_cov_3.216099_g4136_i0_-_ORF_1_(frame_1)_translation	MGFTGLGVGAAMYGLRPIIEFMTWNFAMQAIDQLINSAAKSHYMSSGDLTCPIVFRGLNGGAAGVAAQHSQDYSAWYASVPGLKVIAPWNAEDCRGLLKAAVRDDNPVIFLENEIMYGKSFPRNEKIMEKDFLLPIGKAKVEREGNDVSIITFSRMVGESLEVAKKLEGEGVSIEVLNLRTLRPMDRTTVLNSIRKTHRVVTVEEGWPVCGIGSEICAMIMETDAFDQLDAPVERITGADVPMPYAVNLEQLALPRQQNIYNAVKRVLARKI
SIVAB_PDH_E1b_NODE_7286_length_1181_cov_4.038899_g4136_i1_-_ORF_1_(frame_3)_translation	ITQMKFDRKQGKFPETKQKPKSTMITIREALSSAIDEELERDDKVFLMGEEVGQYQGAYKISKGFYQKYGAKRIWDTPISEMGFTGLGVGAAMYGLRPIIEFMTWNFAMQAIDQLINSAAKSHYMSSGDLTCPIVFRGLNGGAAGVAAQHSQDYSAWYASVPGLKVIAPWNAEDCRGLLKAAVRDDNPVIFLENEIMYGKSFPRNEKIMEKDFLLPIGKAKVEREGNDVSIITFSRMVGESLEVAKKLEGEGVSIEVLNLRTLRPMDRTTVLNSIRKTHRVVTVEEGWPVCGIGSEICAMIMETDAFDQLDAPVERITGADVPMPYAVNLEQLALPRQQNIYNAVKRVLARKI
SIVAB_PDH_E1b_NODE_9216_length_999_cov_3.802752_g8251_i0_-_ORF_1_(frame_1)_translation	DKVFLMGEEVGQYQGAYKISKGFYQKYGAKRIWDTPISEMGFTGLGVGAAMYGLRPIIEFMTWNFAMQAIDQLINSAAKSHYMSSGDLTCPIVFRGLNGGAAGVAAQHSQDYSAWYASVPGLKVIAPWNAEDCRGLLKAAIRDDNPVIFLENEIMYGKSFPRNEKIMEKDFLLPIGKAKVEREGKDVSIITFSRMVGESLEVAKKLEGEGISIEVVNLRTLRPMDRTTVLNSIRKTHRVVTVEEGWPVCGIGSEICAMIMETDAFDQLDAPVERITGADIPMPYAVNLEQLALPRQQNIYNAVKRVLARKI
SIVAB_PDH_E2_NODE_5092_length_1449_cov_2.684569_g4475_i0_-_ORF_1_(frame_1)_translation	MNFLNKSILQQSLLTSFQRCSHFLGSPICIAPFSVLEKTFINENVVRSIPKFNQKCQNYYFARVKKPEPQFNKYNQFYFATNLPTHKKLTMPSLSPTMETGNIIEWKKKEGDKISSGDVLAGIETDKAVVDFEVNEDGYLAKILFPAGSKDIKLGEVIGILVENEKDIAAFKDYESGQTGAAPTKPEDKKTEDKAKDKKIPKEEKRISKEEKGERVIASPLAKKTAKEKEVAISDIEGTGPKGRIIQEDILQKAKEKPKPKEAAKPTMPHVEYEDVELNNIKKVTAERLLLSKTSIPHFYVSIDIKMDKVLNLRAQLNKHSTSKITVNHMIIKAASLACKKVPESNSSFHGSYIRKYSNVDMSVAVQTENGLITPIVFSAEKKGLSQIAKEMIELQKKA…
SIVAB_PDH_E3_NODE_2418_length_2032_cov_21.685039_g2081_i0_-_ORF_1_(frame_3)_translation	CIPSKALLNITQKYYEAKHNFKDMGINIGNVSYDFEKIMQRKTRIVDGLTKGIEMLFKKNKVDLLRGFGTFQDSKTILVESAPGQGQTYRCKNFIIATGSESNNLPGGILPIDENRVLSSTGALSLKEVPKKLIVVGGGVIGLELGSVYRRLGTEVEVIEFLDRILPNFDNELGSYFLSLLKKTGMKFHLSNKVIDGEVTEKSVKLITANLKKNNEKQEFTSDYTLIATGRRANTKGLGLEKTGIQVAKDGKIPINKSLQTKVPGIYAIGDTVEGPMLAHKGEEEGVAVVEMICGEPGHINHNVIPNVVYTHPEVAFVGLSEEEVKAKGIDYKKGKFPFQANSRAKCTDDYSGFVKVLADKKTDKILGVHIIGQNAGELIAECVLAMEGGCTSEDIGRT…
SIVAB_PDH_E3_NODE_2488_length_2009_cov_21.958023_g2081_i1_-_ORF_1_(frame_3)_translation	CIPSKALLNITQKYYEAKHNFKDMGINIGNVSYDFEKIMQRKTRIVDGLTKGIEMLFKKNKVDLLRGFGTFQDSKTILVESAPGQGQTYRCKNFIIATGSESNNLPGGILPIDENRVLSSTGALSLKEVPKKLIVVGGGVIGLELGSVYRRLGTEVEVIEFLDRILPNFDNELGSYFLSLLKKTGMKFHLSNKVIDGEVTEKSVKLITANLKKNNEKQEFTSDYTLIATGRRANTKGLGLEKTGIQVAKDGKIPINKSLQTKVPGIYAIGDTVEGPMLAHKGEEEGVAVVEMICGEPGHINHNVIPNVVYTHPEVAFVGLSEEEVKAKGIDYKKGKFPFQANSRAKCTDDYSGFVKVLADKKTDKILGVHIIGQNAGELIAECVLAMEGGCTSEDIGRT…
SIVAB_PEPCK_NODE_2502_length_2005_cov_162.067093_g2156_i0_-_ORF_1_(frame_2)_translation	MMILKSFHSIKTNLGMMAYSTVVNSKFGETLRSWNNNEKLVQFIEKNVKLMKPDRVHLLDGSDEENALLNKRMVQSGTFIPLNPEIRPNSYLCRSNPKDVARVEEFTLICSEKKEDAGPTNNWADPAKQKEKMLKLYDGAMKGRTMYIIPFSMAPVNSPFSQIGVEITDSPYVVNNMRIMTHGMGNEALNALSSGREFIPCLHSVGAPLKPGEDDAPWPCNPKEKWIVHYPETREIWSYGSGYGGNALLGKKCFALRIASKMARDEGWLAEHMLILGLTAPWGKKYYVGGAFPSACGKTNLAMLLPSLPGWKIETVGDDICWMRIGKDGRLWAVNPEAGCFGVAPGTSMKSNPNCIKGLYKNSIFTNCAITEDGDVWWEGMTDEKPEFVMSWLRTEHYR…
SIVAB_PEPCK_NODE_2544_length_1990_cov_146.420290_g2156_i1_-_ORF_1_(frame_2)_translation	MMILKSFHSIKTNLGMMAYSTVVNSKFGETLRSWNNNEKLVQFIEKNVKLMKPDRVHLLDGSDEENALLNKRMVQSGTFIPLNPEIRPNSYLCRSNPKDVARVEEFTLICSEKKEDAGPTNNWADPAKQKEKMLKLYDGAMKGRTMYIIPFSMAPVNSPFSQIGVEITDSPYVVNNMRIMTHGMGNEALNALSSGREFIPCLHSVGAPLKPGEDDAPWPCNPKEKWIVHYPETREIWSYGSGYGGNALLGKKCFALRIASKMARDEGWLAEHMLILGLTAPWGKKYYVGGAFPSACGKTNLAMLLPSLPGWKIETVGDDICWMRIGKDGRLWAVNPEAGCFGVAPGTSMKSNPNCIKGLYKNSIFTNCAITEDGDVWWEGMTDEKPEFVMSWLRTEHYR…
SIVAB_PGM_NODE_10687_length_882_cov_28.018543_g9624_i0_-_ORF_1_(frame_2)_translation	MLNTYIRRFFTCIPSMPYKVVFVRHGESSWNKENRFTGWTDVDLSEEGSKEAFDAGQRLKGWKFDVCHASVLKRAIKTWNSIADVIEHHHIPLYKHWRLNERHYGGLQGLNKSETAEKHGEQQVKIWRRAYDIAPPKLELDDPRHPSFDSRYKYLPADVLPQTECLKDTVERVLPYWQDHIAKDIIQGKKVIVCAHGNSLRAIIKHLDNMTNKDIINLNIPTAVPLVYELNQELKPIKHYYLASDEEVKAKIEAVASQGKAKK
SIVAB_PGM_NODE_10822_length_872_cov_10.813423_g9750_i0_-_ORF_1_(frame_3)_translation	MDSQSKYKIVFVRHGESTWNKENRFTGWTDVDLSEQGTQEATESGERLKGYKFDVCYTSILKRAIKTWNLIADVIDHHHIPLIKHWRLNERHYGALQGLNKSETAKIHGEEQVKKWRREYDIAPPKLETTDKRFPGNDPKYAGIPTDVLPQTECLKCTVDRVLPYWNDHIAIDILAGKKVIVCAHGNSLRAIVKHLDDLRNDEVVGLDIPTGLPLVYELDANLKPVKHYYLATDEEVKKKIDTVKNQGKSK
SIVAB_PhoE-like_NODE_10564_length_891_cov_3.630890_g9506_i0_-_ORF_1_(frame_1)_translation	MGSYNTKRIAAYSIGGIAVASSYFWFKPLLRNVCRKIAILAKEEIKRTRPKRIILVRHGESEANIDTMLYAHTPDHQISLTEKGKDQADEAGDKLKQIIGKESLKFWVSPYLRGIQTYEILRSKFQENLIAFAMDPRLREQEFANLKNKDPEQWKKVQEERKRVGKFFYRFLNGENGADVYDRVHLFLETIFREIGDVEYRHYDNFVVVCHSLFMRLFVMRFLKMGIEKFDLIACPTNCEIWIFERDEKGTYSLITPIKEDPTYSD
SIVAB_PhoE-like_NODE_11200_length_843_cov_1.976257_g10108_i0_-_ORF_1_(frame_3)_translation	MGSYNAKKITAYSIGGIAVASSYFWFKPLLRNVCRKIAILAKEEIKRTRPKRIILVRHGESEANIDTMLYAHTPDHKISLTEKGKAQADEAGDKLKQIIGKESLKFWVSPYLRGIQTYEILRSKFKENLIAFAMDPRLREQEFANLKDKDPEQLKKVQEERKRVGKFFYRFLNGENGADVYDRVHLFLETIFRKIGDVEYRHYENFVVVCHSLFMRLFVMRFLKMGVEKFDLIACPTNCEIWIFEKDEKGTYSLITPIKEDPTYSD
SIVAB_PhoE-like_NODE_11663_length_812_cov_0.713869_g10547_i0_-_ORF_1_(frame_3)_translation	MNRPKRIILIRHGESEANVDHSVYTHTPDNKIPLTEKGKEQAEEGGNKLKALIGNGSVKFYMSPYLRSIQTFEIFKKKFLDNKLKFTIDPRLREQEFGNFKNKDRNVVAETFKERKQVGKFYYRFLNGESGADVYDRASLFLDTMFREIGKADYHHIENLVIVCHGLFMRLFIMNFLKLSIEQFDLLANPENCEIWIIEKDKMGRYSLMSHIKHDPTYSD
SIVAB_PRX_NODE_1021_length_2790_cov_4.997747_g847_i0_-_ORF_1_(frame_3)_translation	INAEYGIFKMECKECSKICEYGSLSYFPKAAIGKPAPEFKGMAWKETDFAEIKLTDYKGKWLVLFFYPLDFTFVCPTEIVSFSDAAEEFKNINTEVIGCSIDSHYVHREWALKDRKLGGLNPLKIPLLSDISKEISKDYGVYVDDGPNKGVALRATFIIDPTGILRQYSVSDLGVGRSVEEVLRLVQAFQYTDQYGEACPAKWKPGKKGMSTKLESPELKKFWEEELGKK
SIVAB_PRX_NODE_17727_length_523_cov_23.664141_g16398_i0_-_ORF_1_(frame_1)_translation	EYGSLSYFPKAVIGKPAPEFKGMTWKETDFAEIKLTDYKGKWLVLFFYPLDFTFVCPTEIVSFSDAAEEFKNINTEVVGCSIDSHYVHREWALKDRKLGGLNPLKIPLLSDITKEISKDYGVYVDDGPNKGVALRATFIIDPKEILRQYSVCDLGVGRSVEEVMRLVQAFQYTD
SIVAB_SCSa_NODE_10265_length_912_cov_3.382166_g9227_i0_-_ORF_1_(frame_1)_translation	GEMRQLLMNTTMFTSLSKRMFSSLKPYVYINKDTKVICQGITGKQGTFHTEKALEYGTKMVGGVSPKKAGTLHLGIPVFKNCREAKEQTKCDASVIYVPAPQAANAIIDAIKAEIGLIVCITEGIPQHDMVKVKAILRGQKVSRLIGPNCPGIIKSEECKIGIMPGFIHKKGKIGIVSRSGTLTYEAVDQTTKVGLGQSTCVGIGGDPFNGTNFIDVFERFMEDPQTEGIVMIGEIGGVAEEEVAEWVKTNNKQNKPIVSFIAGASAPPGRRMGHAGAIISGGKGGALDKIKALEKSGIRVTRN
SIVAB_SCSb_NODE_1179_length_2655_cov_14.745649_g988_i0_-_ORF_1_(frame_1)_translation	GINAEYGIIKMLRKNLMRIAFPIELASKLSFYMPFGIMKFFDLHEYQAKYILKKNGLQVQKGDLATNPEEAFKIAEKLNGELILKAQVHAGGRGKGRLTSGLKGGVQICKSPEEVKGYAEKMIGYNLITHQTPKQGLPVKSVAVLESVDIKKQFYIAVVLDRKNQSPVIIACNEGGMEIEEVAKRNPEAIKIFPINVLKGITDETAEKVVNVFDFENDTQREKAVDQVKKLYKLFIKIDSTQIEINPWALDTKGDIYFVDSKVGIDESASYRQKEIMKLKADSRGSESVDENEERANKYGLSYIGLDGNIGCLVNGAGLAMATMDIIKLKNGEPANFLDVGGGATEDQVTEAFKILKSHPKVNAILVNIFGGIMRCDIIAKGIIQAVQKVGLQIPVVTR…
SIVAB_SDR_like_NODE_7545_length_1154_cov_81.286271_g6708_i0_-_ORF_1_(frame_3)_translation	INAEYGDTKYSSNMLSFTWISSVNFFYILIALVILTAIKIFFNGPTASAKRRMDNKIILITGVSEGIGKVAALELLQQGATVIFGCRDKNKTMKIINDIKDPNERSRAIFIQLNLCSFASVLKFAKEFGEKFDRLDILVNNAGIIPSKSYNLSENNIEVSLQTNILSPMILTQELLPILNKSNGRVINTASIASEMLYKDAKFYDSLDVTDEKKLKEDYQYFNAYCFSKLANVFFTLHLKKYCEENKINIKTASLHPGVIYTQLYRDQSLLLRMGACIFFPITWLLAKSIYRGAQTTLQLCYLPENELVSGGYYSDTKLKKLMPHAASEENREAAIRFLKRFIDYRGKDLGISFQLI
SIVAB_SLC25_NODE_1681_length_2335_cov_0.720562_g1422_i0_-_ORF_2_(frame_3)_translation	MANLVIEEKSKIVTSFEKIKFYLKVSSIGALRGSLGLILEHPLESVKTQWQDHINFNNAKEIINYIYQKKGVVGFYRGFFPSLIRVTTKQIYRWPMMIFFPKFFEKNIPKRILEKFPGLHKILAGLAIANIELFFVCPLDRLKVYLMTAKVETGAHSSNYLIQFAKQNKHHLIRELFRGFEPTFWRGNISWISFMYLDYCFKVLIKKLRGKETLGIMDLFLVSVGVGIGNVFSVMPFDFAKTQMQKDGHVTKSTLSLITQYYRQYGLKSLYTGWKFKIWQYTLNSIFTVITLEKLEIKAKRI
SIVAB_SLC25_NODE_12381_length_765_cov_0.710031_g11226_i0_-_ORF_1_(frame_2)_translation	NNATEIIKYVYYKKGIIGFYGGFSPNLFRVIIRQFYRWPMMIFFPKFFEKKLPKNLLINFDGLHKILAGLIIANFELIIITPLDRLKIYYATERTKGSFYHFYKENKKTIMRELFRGFEPTFWRGNVSWISFLSLDYYFKKLFKKLRKSEKLRFIDLFFISIGVGIGNVVSVMPFDFVKTQMQKEGNITTSTIPLLIKYYKANGIKTLYTGWKFKALQYVVNSIFTVMALEKFERKSKKFL
SIVAB_SOD_NODE_12976_length_732_cov_1.242975_g11800_i0_-_ORF_1_(frame_3)_translation	MQTTTSKFPKAELPKLDYGYADLEPVLPENLIKIHHTKHHQGYIDNYNKFMEEFLNATERGDFDKITSLTKDIKFNGGSHINHSIYWKNLAPIKQGGGKLPEESSPLMKHIIQQWGSAENFINDFIDKIMKIQGSGWGNLVYDKVTKTLSYLETKDQDPVSLIPGKVPILVIDAWEHSWYLKYLNEKKKYYTEIWKIINWKDLEERYENATSTNPKF
SIVAB_SOD_NODE_15769_length_597_cov_6.721277_g14495_i0_-_ORF_1_(frame_2)_translation	NKFMEEFLYATERGDFDKITSLTKDIKFNGGSHINHSIYWKNLAPIKQGGGKLPEESSPLMKHIIQQWGSAENFINDFIDKIMKIQGSGWGNLVYDKVTKTLSYLETKDQDPVSLIPGKVPILVMDAWEHSWYLKYLNEKKKYYTEIWKIINWKDLEERYENATSTIPKF
SIVAB_TPI_NODE_12038_length_786_cov_47.743551_g10906_i0_-_ORF_1_(frame_2)_translation	SHCKFLNGIQFESEKCEVAICPIFLHLESVLNQIDKKYIVSSQNISMFDNGAYTGEISAKQLKDLGINWTLIAHSERRQYFKEDENVIGEKIMKALNGGINVILCVGEKLEQREAQQTFSVIEAQMKTAGKTVGNNWDKVVIAYEPVWAIGTGKTASKEQAQEVHDYIRKWIKSSVSEEVAKKVRIIYGGSVTDTNCNELIAQPDIDGFLVGGASLKPAFKTIIESYKNKKY
SIVAB_TPI_NODE_14958_length_631_cov_19.825397_g13709_i0_-_ORF_1_(frame_2)_translation	AYTGEVTAKQLKDFGINWTLIGHSERRALFGETNEVVGKKVKMALAHDVKVIACVGEKLAERESGNTMKVVLEHMDAIAKNTTNWKKMVIAYEPVWAIGTGKTASPEQAQEVHGEIRQWIAKKISCSVADEVQIIYGGSVTESNAKELIMKKDIDGFLVGGASLKGGFKTIVSSYVHKTKF
SIVAB_unknown_protein_NODE_3302_length_1777_cov_1.863636_g2868_i0_-_ORF_1_(frame_1)_translation	VRDYLKYKMNSMTCSHKLAKIFKRMDNFGANIQFRINNQREYQSLFGGITFFTFVVLSSSYVIYMFYNFVIGTNPSVIFSNKILETNPSIDLRKTGFSLAFGLIYENGASVAIEDTKDFFDYKIDLIMWIGESDIRKQNLNPYKCERSDFKNISDQAFNDNEIGEMYCANTTRANYSLAGLYTDYWYQYLELNIYIKDSAIDNMDLIRNFLKENPLQMIVFFMDTGIDYQNSSFPLPNFLNYIDKTIDFDFYKTNEVFISKLEFQTDSNILFPDPSHQGASIYDKSFDYFHKVDKRTEHTNDQLKIGTFMIKASSKIMQVSRVYQKFPNFLAEMSGIISQCLFVIFMLTTFLNRKTVDHKLIDRVLKFKGSKYYYVEYLVDTFNTLGRKTSSLGVLLYD…
SIVAB_YMC_NODE_8409_length_1069_cov_3.092357_g7510_i0_-_ORF_1_(frame_2)_translation	YRIQSSTSNSKFKTSKFISEFVYKEGYKTFLKGLTVTTASVLSTSFLQFIXXXXVRDISYMSTLSKHKKNTFECCITALVPGLAKILITQPFDFIRYRIQSSTSNSKFKTSKFISEFVYKEGYKTFLKGLTVTTASVLSTSFLQFIFYQKFLEMVVKLKKYKRISSPIIQQSLGSAGAGGLFWALLGLMTLPIDIVRIKLQSIQNIVNIEKGAYRYKNSSDCFKKIWAQSGVKGFFIGGHLSVLREGIGAALYFGLFEYLKKRNEFQGKTLKNHQRLSYGAMAGALNWAVTLPIDIVKTKIIVDSVEHKYKGIFDCVQKIYKHSGVFGFYRGFYLVMTRGIIVNAVVLASFDMTRT
SIVAB_YMC_NODE_9430_length_980_cov_7.071512_g8449_i0_-_ORF_1_(frame_1)_translation	MTDKKKLFSMNDFISGSMAGFVQVLLGQPFDIVKVRMQTNNEIKSVVQCAKNIYKSEGLLGFYKGTMSPLMGISICASVQFASNEMAKNFFMTRNKQKTRKPTMSIKDNVICGLFSGFCGSFIVSPVELFKIKMQIQGTGQGTSYSNTFDCMKKTLTTHGIRGVYQGLCATLFREVPAYGLYFGVYETLMSMSEKKYGTRNKIPSWKICMFGGLSGLALWMGTFPQDVIKSCIQASPIEGGKYKTIFSTFRTIRAEKGYGGLLKGVGPCMLRALPINAATFLTFELVQKLLNRNKPN
SIVAB_YMC_NODE_13930_length_681_cov_5.209386_g12713_i0_-_ORF_1_(frame_2)_translation	AGFVQVLLGQPFDIVKVRMQTNNEIKSVVQCAKNIYKSEGLLGFYKGTMSPLMGISICASVQFASNEMAKNFFMTRNKQKTGKPTMSIKDNVICGLFSGFCGSFIVSPVELFKIKMQIQGTGQGTSYSNTFDCMKKTLTTHGIRGVYQGLCATLFREVPAYGLYFGVYETLMSMSEKKYGTRNKIPSWKICMFGGLSGLALWMGTFPQDVIKSCIQASPIEGGKYK
LEG_mgen_TIM17_NODE_148_length_36712_cov_57.623179_-_ORF_7_(frame_2)_translation	MNQVPCPGRIIVDLGDGFTTGCSMGAIWYFLKGSYYAIRRERIKGGLALLRSRAPILGGSFAMWACFYSMSSCLLISMRQREDQLNSIIAGFTTGFILAIRGGFKNALKSAWVGGMFLSIIEAIMLINNQYHKRAQIKEEIRVINHYKRQFEKQGVKFIESPRRMSEIKKL
LEG_mgen_TIM50_NODE_2548_length_5695_cov_35.354885_-_ORF_2_(frame_1)_translation	MPYYEVVLPDKLQPVGRPIEKTLVLNLNKTLVSYEYKMGRGFEILKRPGVLKFLQELGQSYEIVLFGNEDTHFVEEIASKLDQYGVNIKYKLGKEATRLVNGRGVKDLDYLNRDLKNVIVIDYDPNNVALHPNNTIIIPEFKGDGKDRELIFLIVFLKDLAKPKVTDVRKEIEQYGSYKPYEKYYRSNPKYQKLLPRDSTIKDDQDLQEALAEQSKGRNKK
LEG_TIM17_part_NODE_22767_length_324_cov_1.633466_g21647_i0_extraction_translation_frame_1_reverse	MNQVPCPGRIIVDLGDGFTTGCSMGAIWYFLKGSYYAIRRERIKGGLALLRSRAPILGGSFAMWACFY
LEG_TIM50_NODE_6640_length_858_cov_2.542675_g5733_i0_-_ORF_1_(frame_2)_translation	EFAIYNRYSRFIIEKFSMLWHLVYWGLTLPYYEVVLPDKLQHVGRPIEKTLVLNLNKTLVSYEYKMGRGFEILKRPGVLKFLQELGQSYEIVLFGNEDTHFVEEIASKLDQLVNGRGVKDLDYLNRDLKNVIVIDYDPNNVALHPNNTIIIPEFKGDGKDRELIFLIVFLKDLAKPKVTDVRKEIEQYGSYKPYEKYYRSNPKYQKLLPRDSTIKDDQDLQEALAEQARGETRNKSYSNLNE
SIVAB_TIM17_NODE_17180_length_542_cov_0.674699_g15861_i0_-_ORF_1_(frame_2)_translation	MNQAPCPGRIISDIGDGFTTGCSMGALFYFMKGAFYAMRRERIKGGLLLLRSRAPILGGSFAMWSLFYSMSSCALVYWRQKEDQLNAVAAGFATGFILSIRGGIKNAFKSALTGGVFLSIIEAISFIYSQKQRRRQILEEIKLINHYKKQFEKQGIKFVELETTKRELE
SIVAB_TIM50_NODE_2514_length_2002_cov_2.318400_g2166_i0_-_ORF_1_(frame_2)_translation	YKTSRRIRFFLGKAFNLLFLAGGVITLYNGYLYWKKDKPKENLLYNKYSMFIVDKIISLWDLIYGGLTMPYHEVLLPDKLQPVGRPIEKTLVLNLNKTLVSYEYKMGRGFEILKRPGVQKFLQELGQLYEIVIFSDEDTSFVEEIASKLDQFGMNIKYKLGKEATKFVNGRGVKDLNYLNRDLKNVLVIDYDPNNVLLHPNNTIVIPEFKGDGKDRELLFLIVFLKEMAKQNVTDVRTEIKKYGSYKPYEKFYKSDPKFQRLLPKETTSKDDKDLQILHSMAKK
